# Supplementary material for: STIM1-dependent peripheral coupling governs the contractility of vascular smooth muscle cells
Source: eLife. 2022 Feb 11;11:e70278. doi: 10.7554/eLife.70278 (PMC8947769; doi:10.7554/eLife.70278)
Supplement: Figure 1—figure supplement 1—source data 1. [file elife-70278-fig1-figsupp1-data1.xlsx]

## Sheet: Supplementary figure 1B
Densitometric analysis (STIM1 protein expression normalized to total protein)	CA SM
	Control	Stim1 wt/wt + tamox
Mouse 1	0.993702	0.863572
Mouse 2	1.07557	0.776512
Mouse 3	0.682109	0.608182
Mouse 4
Mouse 5
Minimum	0.6821	0.6082
25% Percentile	0.6821	0.6082
Median	0.9937	0.7765
75% Percentile	1.076	0.8636
Maximum	1.076	0.8636
Mean	0.9171	0.7494
Std. Deviation	0.2076	0.1298
Std. Error of Mean	0.1199	0.07496
Lower 95% CI	0.4014	0.4269
Upper 95% CI	1.433	1.072
Unpaired t test
P value	0.3012
Significantly different (P < 0.05)?	No
One- or two-tailed P value?	Two-tailed
Mean of column A	0.9171
Mean of column B	0.7494
Difference between means (B - A) ± SEM	-0.1677 ± 0.1414
95% confidence interval	-0.5602 to 0.2248

## Sheet: Supplementary figure 1C
Densitometric analysis (STIM1 protein expression normalized to total protein)	MA SM
	Control	Stim1 wt/wt + tamox
Mouse 1	0.94314	0.310444
Mouse 2	0.347217	0.429853
Mouse 3	0.54013	0.261281
Mouse 4	0.762956	0.194198
Mouse 5	0.22496
Minimum	0.225	0.1942
25% Percentile	0.2861	0.211
Median	0.5401	0.2859
75% Percentile	0.853	0.4
Maximum	0.9431	0.4299
Mean	0.5637	0.2989
Std. Deviation	0.294	0.09943
Std. Error of Mean	0.1315	0.04972
Lower 95% CI	0.1986	0.1407
Upper 95% CI	0.9288	0.4572
Unpaired t test
P value	0.1322
Significantly different (P < 0.05)?	No
One- or two-tailed P value?	Two-tailed
Mean of column A	0.5637
Mean of column B	0.2989
Difference between means (B - A) ± SEM	-0.2647 ± 0.1554
95% confidence interval	-0.6321 to 0.1027

## Sheet: Supplementary figure 1D
Densitometric analysis (STIM1 protein expression normalized to total protein)	Aortic SM
	Control	Stim1 wt/wt + tamox
Mouse 1	0.48189	0.341497
Mouse 2	0.331949	0.224075
Mouse 3	0.241623	0.418668
Mouse 4
Mouse 5
Minimum	0.2416	0.2241
25% Percentile	0.2416	0.2241
Median	0.3319	0.3415
75% Percentile	0.4819	0.4187
Maximum	0.4819	0.4187
Mean	0.3518	0.3281
Std. Deviation	0.1214	0.09799
Std. Error of Mean	0.07007	0.05657
Lower 95% CI	0.05035	0.08466
Upper 95% CI	0.6533	0.5715
Unpaired t test
P value	0.8051
Significantly different (P < 0.05)?	No
One- or two-tailed P value?	Two-tailed
Mean of column A	0.3518
Mean of column B	0.3281
Difference between means (B - A) ± SEM	-0.02374 ± 0.09006
95% confidence interval	-0.2738 to 0.2263

## Sheet: Supplementary figure 1E
Densitometric analysis (STIM1 protein expression normalized to total protein)	Colon SM
	Control	Stim1 wt/wt + tamox
Mouse 1	0.285026	0.547339
Mouse 2	0.222469	0.73196
Mouse 3	0.373635	0.453285
Mouse 4	0.662106	0.674121
Mouse 5
Minimum	0.2225	0.4533
25% Percentile	0.2381	0.4768
Median	0.3293	0.6107
75% Percentile	0.59	0.7175
Maximum	0.6621	0.732
Mean	0.3858	0.6017
Std. Deviation	0.1944	0.1254
Std. Error of Mean	0.09718	0.06271
Lower 95% CI	0.07654	0.4021
Upper 95% CI	0.6951	0.8013
Unpaired t test
P value	0.1112
Significantly different (P < 0.05)?	No
One- or two-tailed P value?	Two-tailed
Mean of column A	0.3858
Mean of column B	0.6017
Difference between means (B - A) ± SEM	0.2159 ± 0.1157
95% confidence interval	-0.06714 to 0.4989

## Sheet: Supplementary figure 1F
Densitometric analysis (STIM1 protein expression normalized to total protein)	Bladder SM
	Control	Stim1 wt/wt + tamox
Mouse 1	0.692369	0.74316
Mouse 2	0.756429	0.563674
Mouse 3	0.772163	1.15509
Mouse 4
Mouse 5
Minimum	0.6924	0.5637
25% Percentile	0.6924	0.5637
Median	0.7564	0.7432
75% Percentile	0.7722	1.155
Maximum	0.7722	1.155
Mean	0.7403	0.8206
Std. Deviation	0.04227	0.3032
Std. Error of Mean	0.0244	0.1751
Lower 95% CI	0.6353	0.06739
Upper 95% CI	0.8453	1.574
Unpaired t test
P value	0.6731
Significantly different (P < 0.05)?	No
One- or two-tailed P value?	Two-tailed
Mean of column A	0.7403
Mean of column B	0.8206
Difference between means (B - A) ± SEM	0.08032 ± 0.1768
95% confidence interval	-0.4104 to 0.5711

## Sheet: Supplementary figure 1G
Densitometric analysis (STIM1 protein expression normalized to total protein)	Brain SM
	Control	Stim1 wt/wt + tamox
Mouse 1	0.353095	0.413927
Mouse 2	0.331267	0.399807
Mouse 3	0.25756	0.256478
Mouse 4
Mouse 5
Minimum	0.2576	0.2565
25% Percentile	0.2576	0.2565
Median	0.3313	0.3998
75% Percentile	0.3531	0.4139
Maximum	0.3531	0.4139
Mean	0.314	0.3567
Std. Deviation	0.05006	0.08711
Std. Error of Mean	0.0289	0.0503
Lower 95% CI	0.1896	0.1403
Upper 95% CI	0.4383	0.5731
Unpaired t test
P value	0.5019
Significantly different (P < 0.05)?	No
One- or two-tailed P value?	Two-tailed
Mean of column A	0.314
Mean of column B	0.3567
Difference between means (B - A) ± SEM	0.04276 ± 0.05801
95% confidence interval	-0.1183 to 0.2038
