# Supplementary material for: STIM1-dependent peripheral coupling governs the contractility of vascular smooth muscle cells
Source: eLife. 2022 Feb 11;11:e70278. doi: 10.7554/eLife.70278 (PMC8947769; doi:10.7554/eLife.70278)
Supplement: Figure 1—figure supplement 2—source data 1. [file elife-70278-fig1-figsupp2-data1.xlsx]

## Sheet: Supplementary Figure 2B
STIM1 clusters per area	Control	Stim1 smKO
Cell 1	31.6358	10.4216
Cell 2	19.014	11.3608
Cell 3	16.1917	4.58057
Cell 4	20.5976	7.54457
Cell 5	17.9984	15.8936
Cell 6	15.8943	5.28954
Cell 7	21.9607	4.32143
Cell 8	21.5681	7.93704
Cell 9	12.8781
Cell 10	13.6618
Unpaired t test
P value	0.0002
Significantly different (P < 0.05)?	Yes
One- or two-tailed P value?	Two-tailed
Mean of column A	19.14
Mean of column B	8.419
Difference between means (B - A) ± SEM	-10.72 ± 2.289
95% confidence interval	-15.57 to -5.868

## Sheet: Supplementary Figure 2C
Control	Stim1 smKO		Unpaired t test
400	400		P value	<0.0001
400	400		Significantly different (P < 0.05)?	Yes
400	400		One- or two-tailed P value?	Two-tailed
400	400
400	400		Mean of column A	1858
400	400		Mean of column B	808.2
400	400		Difference between means (B - A) ± SEM	-1050 ± 43.68
400	400		95% confidence interval	-1136 to -964.5
400	400
400	400
400	400
400	400
400	400
400	400
400	400
400	400
400	400
400	400
400	400
400	400
400	400
400	400
400	400
400	400
400	400
400	400
400	400
400	400
400	400
400	400
400	400
400	400
400	400
400	400
400	400
400	400
400	400
400	400
400	400
400	400
400	400
400	400
400	400
400	400
400	400
400	400
400	400
400	400
400	400
400	400
400	400
400	400
400	400
400	400
400	400
400	400
400	400
400	400
400	400
400	400
400	400
400	400
400	400
400	400
400	400
400	400
400	400
400	400
400	400
400	400
400	400
400	400
400	400
400	400
400	400
400	400
400	400
400	400
400	400
400	400
400	400
400	400
400	400
400	400
400	400
400	400
400	400
400	400
400	400
400	400
400	800
400	800
400	800
400	800
400	800
400	800
400	800
400	800
400	800
400	800
400	800
400	800
400	800
400	800
400	800
400	800
400	800
400	800
400	800
400	800
400	800
400	800
400	800
400	800
400	800
400	800
400	800
400	800
400	800
400	800
400	800
400	800
400	800
400	800
400	800
400	800
400	800
400	800
400	800
400	800
400	800
400	800
400	800
400	800
400	800
400	800
400	800
400	800
400	800
400	1200
400	1200
400	1200
400	1200
400	1200
400	1200
400	1200
400	1200
400	1200
400	1200
400	1200
400	1200
400	1200
400	1200
400	1200
400	1200
400	1200
400	1200
400	1200
400	1200
400	1200
400	1200
400	1200
400	1200
400	1200
400	1200
400	1600
400	1600
400	1600
400	1600
400	1600
400	1600
400	1600
400	1600
400	1600
400	1600
400	1600
400	1600
400	1600
400	2000
400	2000
400	2000
400	2000
400	2000
400	2000
400	2000
400	2400
400	2400
400	2400
400	2400
400	2800
400	2800
400	3600
400	400
400	400
400	400
400	400
400	400
400	400
400	400
400	400
400	400
400	400
400	400
400	400
400	400
400	400
400	400
400	400
400	400
400	400
400	400
400	400
400	400
400	400
400	400
400	400
400	400
400	400
400	400
400	400
400	400
400	400
400	400
400	400
400	400
400	400
400	400
400	400
400	400
400	400
400	400
400	400
400	400
400	400
400	400
400	400
400	400
400	400
400	400
400	400
400	400
400	400
400	400
400	400
400	400
400	400
400	400
400	400
400	400
400	400
400	400
400	400
400	400
400	400
400	400
400	400
400	400
400	400
400	400
400	400
400	400
400	400
400	400
400	400
400	400
400	400
400	400
400	400
400	400
400	400
400	400
400	400
400	400
400	400
400	400
400	400
400	400
400	400
400	400
400	400
400	400
400	400
400	400
400	400
400	400
400	400
400	400
400	400
400	400
400	400
400	400
400	400
400	400
400	400
400	400
400	400
400	400
400	400
400	400
400	400
400	400
400	400
400	400
400	400
400	400
400	400
400	400
400	400
400	400
400	400
400	400
400	400
400	400
400	400
400	400
400	400
400	400
400	400
400	400
400	400
400	400
400	400
400	400
400	400
400	400
400	400
400	400
400	400
400	400
400	400
400	400
400	400
400	400
400	400
400	400
400	400
400	400
400	400
400	400
400	400
400	400
400	400
400	400
400	400
400	400
400	400
400	400
400	400
400	400
400	400
400	400
400	400
400	400
400	400
400	400
400	400
400	400
400	400
400	400
400	400
400	400
400	400
400	400
400	400
400	400
400	400
400	400
400	400
400	400
400	400
400	400
400	400
400	400
400	400
400	400
400	400
400	400
400	400
400	400
400	400
400	400
400	400
400	400
400	400
400	400
400	400
400	400
400	400
400	400
400	400
400	400
400	400
400	400
400	400
400	400
400	400
400	400
400	400
400	400
400	400
400	400
400	400
400	400
400	400
400	400
400	400
400	400
400	400
400	400
400	400
400	400
400	400
400	400
400	400
400	400
400	400
400	400
400	400
400	400
400	400
400	400
400	400
400	400
400	400
400	400
400	400
400	400
400	400
400	400
400	400
400	400
400	400
400	400
400	400
400	400
400	400
400	400
400	400
400	400
400	400
400	400
400	400
400	400
400	400
400	400
400	400
400	400
400	400
400	400
400	400
400	400
400	400
400	400
400	400
400	400
400	400
400	400
400	400
400	400
400	400
400	400
400	400
400	400
400	400
400	400
400	400
400	400
400	400
400	400
400	400
400	400
400	400
400	400
400	400
400	400
400	400
400	400
400	400
400	400
400	400
400	400
400	400
400	400
400	400
400	400
400	400
400	400
400	400
400	400
400	400
400	400
400	400
400	400
400	400
400	400
400	400
400	400
400	400
400	400
400	400
400	400
400	400
400	400
400	400
400	400
400	400
400	400
400	400
400	400
400	400
400	400
400	400
400	400
400	400
400	400
400	400
400	400
400	400
400	400
400	400
400	400
400	400
400	400
400	400
400	400
400	400
400	400
400	400
400	400
400	400
400	400
400	400
400	400
400	400
400	400
400	400
400	400
400	400
400	400
400	400
400	400
400	400
400	400
400	400
400	400
400	400
400	400
400	400
400	400
400	800
400	800
400	800
400	800
400	800
400	800
400	800
400	800
400	800
400	800
400	800
400	800
400	800
400	800
400	800
400	800
400	800
400	800
400	800
400	800
400	800
400	800
400	800
400	800
400	800
400	800
400	800
400	800
400	800
400	800
400	800
400	800
400	800
400	800
400	800
400	800
400	800
400	800
400	800
400	800
400	800
400	800
400	800
400	800
400	800
400	800
400	800
400	800
400	800
400	800
400	800
400	800
400	800
400	800
400	800
400	800
400	800
400	800
400	800
400	800
400	800
400	800
400	800
400	800
400	800
400	800
400	800
400	800
400	800
400	800
400	800
400	800
400	800
400	800
400	800
400	800
400	800
400	800
400	800
400	800
400	800
400	800
400	800
400	800
400	800
400	800
400	800
400	800
400	800
400	800
400	800
400	800
400	800
400	800
400	800
400	800
400	800
400	800
400	800
400	800
400	800
400	800
400	800
400	800
400	800
400	800
400	800
400	800
400	800
400	800
400	800
400	800
400	800
400	800
400	800
400	800
400	800
400	800
400	800
400	800
400	800
400	800
400	800
400	800
400	800
400	800
400	800
400	800
400	800
400	800
400	800
400	800
400	800
400	800
400	800
400	800
400	800
400	800
400	800
400	800
400	800
400	800
400	800
400	800
400	800
400	800
400	800
400	800
400	800
400	800
400	800
400	800
400	800
400	800
400	800
400	800
400	800
400	800
400	800
400	800
400	800
400	800
400	800
400	800
400	800
400	800
400	800
400	800
400	800
400	800
400	800
400	800
400	800
400	800
400	800
400	800
400	800
400	800
400	800
400	800
400	1200
400	1200
400	1200
400	1200
400	1200
400	1200
400	1200
400	1200
400	1200
400	1200
400	1200
400	1200
400	1200
400	1200
400	1200
400	1200
400	1200
400	1200
400	1200
400	1200
400	1200
400	1200
400	1200
400	1200
400	1200
400	1200
400	1200
400	1200
400	1200
400	1200
400	1200
400	1200
400	1200
400	1200
400	1200
400	1200
400	1200
400	1200
400	1200
400	1200
400	1200
400	1200
400	1200
400	1200
400	1200
400	1200
400	1200
400	1200
400	1200
400	1200
400	1200
400	1200
400	1200
400	1200
400	1200
400	1200
400	1200
400	1200
400	1200
400	1200
400	1200
400	1200
400	1200
400	1200
400	1200
400	1200
400	1200
400	1200
400	1200
400	1200
400	1200
400	1200
400	1200
400	1200
400	1200
400	1200
400	1200
400	1200
400	1200
400	1200
400	1200
400	1200
400	1200
400	1200
400	1200
400	1200
400	1200
400	1200
400	1200
400	1200
400	1200
400	1200
400	1200
400	1200
400	1200
400	1600
400	1600
400	1600
400	1600
400	1600
400	1600
400	1600
400	1600
400	1600
400	1600
400	1600
400	1600
400	1600
400	1600
400	1600
400	1600
400	1600
400	1600
400	1600
400	1600
400	1600
400	1600
400	1600
400	1600
400	1600
400	1600
400	1600
400	1600
400	1600
400	1600
400	1600
400	1600
400	1600
400	1600
400	1600
400	1600
400	1600
400	1600
400	1600
400	1600
400	1600
400	1600
400	1600
400	1600
400	1600
400	1600
400	1600
400	1600
400	1600
400	1600
400	1600
400	2000
400	2000
400	2000
400	2000
400	2000
400	2000
400	2000
400	2000
400	2000
400	2000
400	2000
400	2000
400	2000
400	2000
400	2000
400	2000
400	2000
400	2000
400	2000
400	2000
400	2000
400	2000
400	2000
400	2000
400	2000
400	2000
400	2000
400	2000
400	2000
400	2000
400	2400
400	2400
400	2400
400	2400
400	2400
400	2400
400	2400
400	2400
400	2400
400	2400
400	2400
400	2400
400	2400
400	2400
400	2400
400	2800
400	2800
400	2800
400	2800
400	3200
400	3200
400	3200
400	3600
400	3600
400	4000
400	4000
400	4000
400	4000
400	4400
400	4800
400	400
400	400
400	400
400	400
400	400
400	400
400	400
400	400
400	400
400	400
400	400
400	400
400	400
400	400
400	400
400	400
400	400
400	400
400	400
400	400
400	400
400	400
400	400
400	400
400	400
400	400
400	400
400	400
400	400
400	400
400	400
400	400
400	400
400	400
400	400
400	400
400	400
400	400
400	400
400	400
400	400
400	400
400	400
400	400
400	400
400	400
400	400
400	400
400	400
400	400
400	400
400	400
400	400
400	400
400	400
400	400
400	400
400	400
400	400
400	400
400	400
400	400
400	400
400	400
400	400
400	400
400	400
400	400
400	400
400	400
400	400
400	400
400	400
400	400
400	400
400	400
400	400
400	800
400	800
400	800
400	800
400	800
400	800
400	800
400	800
400	800
400	800
400	800
400	800
400	800
400	800
400	800
400	800
400	800
400	800
400	800
400	800
400	800
400	800
400	800
400	800
400	800
400	800
400	800
400	800
400	800
400	800
400	800
400	800
400	800
400	800
400	800
400	800
400	800
400	800
400	800
400	800
400	800
400	800
400	800
400	800
400	800
400	800
400	800
400	800
400	800
400	1200
400	1200
400	1200
400	1200
400	1200
400	1200
400	1200
400	1200
400	1200
400	1200
400	1200
400	1200
800	1200
800	1200
800	1200
800	1200
800	1200
800	1600
800	1600
800	1600
800	1600
800	1600
800	1600
800	1600
800	1600
800	1600
800	2000
800	2000
800	2000
800	2000
800	2000
800	2400
800	2400
800	2800
800	2800
800	3200
800	400
800	400
800	400
800	400
800	400
800	400
800	400
800	400
800	400
800	400
800	400
800	400
800	400
800	400
800	400
800	400
800	400
800	400
800	400
800	400
800	400
800	400
800	400
800	400
800	400
800	400
800	400
800	400
800	400
800	400
800	400
800	400
800	400
800	400
800	400
800	400
800	400
800	400
800	400
800	400
800	400
800	400
800	400
800	400
800	400
800	400
800	400
800	400
800	400
800	400
800	400
800	400
800	400
800	400
800	400
800	400
800	400
800	400
800	400
800	400
800	400
800	400
800	400
800	400
800	400
800	400
800	400
800	400
800	400
800	400
800	400
800	400
800	400
800	400
800	400
800	400
800	400
800	400
800	400
800	400
800	400
800	400
800	400
800	400
800	400
800	400
800	400
800	400
800	400
800	400
800	400
800	400
800	400
800	400
800	400
800	400
800	400
800	400
800	400
800	400
800	400
800	400
800	400
800	400
800	400
800	400
800	400
800	400
800	400
800	400
800	400
800	400
800	400
800	400
800	400
800	400
800	400
800	400
800	400
800	400
800	400
800	400
800	400
800	400
800	400
800	400
800	400
800	400
800	400
800	400
800	400
800	400
800	400
800	400
800	400
800	400
800	400
800	400
800	400
800	400
800	400
800	400
800	400
800	400
800	400
800	400
800	400
800	400
800	400
800	400
800	400
800	400
800	400
800	400
800	400
800	400
800	400
800	400
800	400
800	400
800	400
800	400
800	400
800	400
800	400
800	400
800	400
800	400
800	400
800	400
800	400
800	400
800	400
800	400
800	400
800	400
800	400
800	400
800	400
800	400
800	400
800	400
800	400
800	400
800	400
800	400
800	400
800	400
800	400
800	400
800	800
800	800
800	800
800	800
800	800
800	800
800	800
800	800
800	800
800	800
800	800
800	800
800	800
800	800
800	800
800	800
800	800
800	800
800	800
800	800
800	800
800	800
800	800
800	800
800	800
800	800
800	800
800	800
800	800
800	800
800	800
800	800
800	800
800	800
800	800
800	800
800	800
800	800
800	800
800	800
800	800
800	800
800	800
800	800
800	800
800	800
800	800
800	800
800	800
800	800
800	800
800	800
800	800
800	800
800	800
800	800
800	800
800	800
800	800
800	800
800	800
800	800
800	800
800	800
800	800
800	800
800	800
800	800
800	800
800	800
800	800
800	800
800	1200
800	1200
800	1200
800	1200
800	1200
800	1200
800	1200
800	1200
800	1200
800	1200
800	1200
800	1200
800	1200
800	1200
800	1200
800	1200
800	1200
800	1200
800	1200
800	1200
800	1200
800	1200
800	1200
800	1200
800	1200
800	1200
800	1200
800	1600
800	1600
800	1600
800	1600
800	1600
800	1600
800	1600
800	1600
800	1600
800	1600
800	1600
800	1600
800	1600
800	1600
800	1600
800	1600
800	1600
800	1600
800	1600
800	2000
800	2000
800	2000
800	2000
800	2000
800	2000
800	2000
800	2000
800	2000
800	2400
800	2400
800	2400
800	2400
800	3600
800	4400
800	4800
800	400
800	400
800	400
800	400
800	400
800	400
800	400
800	400
800	400
800	400
800	400
800	400
800	400
800	400
800	400
800	400
800	400
800	400
800	400
800	400
800	400
800	400
800	400
800	400
800	400
800	400
800	400
800	400
800	400
800	400
800	400
800	400
800	400
800	400
800	400
800	400
800	400
800	400
800	400
800	400
800	400
800	400
800	400
800	400
800	400
800	400
800	400
800	400
800	400
800	400
800	400
800	400
800	400
800	400
800	400
800	400
800	400
800	400
800	400
800	400
800	400
800	400
800	400
800	400
800	400
800	400
800	400
800	400
800	400
800	400
800	400
800	400
800	400
800	400
800	400
800	400
800	400
800	400
800	400
800	400
800	400
800	400
800	400
800	400
800	400
800	400
800	400
800	400
800	400
800	400
800	400
800	400
800	400
800	400
800	400
800	400
800	400
800	400
800	400
800	400
800	400
800	400
800	400
800	400
1200	400
1200	400
1200	400
1200	400
1200	400
1200	400
1200	400
1200	400
1200	400
1200	400
1200	400
1200	400
1200	400
1200	400
1200	400
1200	400
1200	400
1200	400
1200	400
1200	400
1200	400
1200	400
1200	400
1200	400
1200	400
1200	400
1200	400
1200	400
1200	400
1200	400
1200	400
1200	400
1200	400
1200	400
1200	400
1200	400
1200	400
1200	400
1200	400
1200	400
1200	400
1200	400
1200	400
1200	400
1200	400
1200	400
1200	400
1200	400
1200	400
1200	400
1200	400
1200	400
1200	400
1200	400
1200	400
1200	400
1200	400
1200	400
1200	400
1200	400
1200	400
1200	400
1200	400
1200	400
1200	400
1200	400
1200	400
1200	400
1200	400
1200	400
1200	400
1200	400
1200	400
1200	400
1200	400
1200	400
1200	400
1200	400
1200	400
1200	400
1200	400
1200	400
1200	400
1200	400
1200	400
1200	400
1200	400
1200	400
1200	400
1200	400
1200	400
1200	400
1200	400
1200	400
1200	400
1200	400
1200	400
1200	400
1200	400
1200	400
1200	400
1200	400
1200	400
1200	400
1200	400
1200	400
1200	400
1200	400
1200	400
1200	400
1200	400
1200	400
1200	400
1200	400
1200	400
1200	400
1200	400
1200	400
1200	400
1200	400
1200	400
1200	400
1200	400
1200	400
1200	400
1200	400
1200	400
1200	400
1200	400
1200	400
1200	400
1200	400
1200	400
1200	400
1200	400
1200	400
1200	400
1200	400
1200	400
1200	400
1200	400
1200	400
1200	400
1200	400
1200	400
1200	400
1200	400
1200	400
1200	400
1200	400
1200	400
1200	400
1200	400
1200	400
1200	400
1200	400
1200	400
1200	400
1200	400
1200	400
1200	400
1200	400
1200	400
1200	400
1200	400
1200	400
1200	400
1200	400
1200	400
1200	400
1200	400
1200	400
1200	400
1200	400
1200	400
1200	400
1200	400
1200	400
1200	400
1200	400
1200	400
1200	400
1200	400
1200	400
1200	400
1200	400
1200	400
1200	400
1200	400
1200	400
1200	400
1200	400
1200	400
1200	400
1200	400
1200	400
1200	400
1200	400
1200	400
1200	400
1200	400
1200	400
1200	400
1200	400
1200	400
1200	400
1200	400
1200	400
1200	400
1200	400
1200	400
1200	400
1200	400
1200	400
1200	400
1200	400
1200	400
1200	400
1200	400
1200	400
1200	400
1200	400
1200	400
1200	400
1200	400
1200	400
1200	400
1200	400
1200	400
1200	400
1200	400
1200	400
1200	400
1200	400
1200	400
1200	400
1200	400
1200	400
1200	400
1200	400
1200	400
1200	400
1200	400
1200	400
1200	400
1200	400
1200	400
1200	400
1600	400
1600	400
1600	400
1600	400
1600	400
1600	400
1600	400
1600	400
1600	400
1600	400
1600	400
1600	400
1600	400
1600	400
1600	400
1600	400
1600	400
1600	400
1600	400
1600	400
1600	400
1600	400
1600	400
1600	400
1600	400
1600	400
1600	400
1600	400
1600	400
1600	400
1600	400
1600	400
1600	400
1600	400
1600	400
1600	400
1600	400
1600	400
1600	400
1600	400
1600	400
1600	400
1600	400
1600	400
1600	400
1600	400
1600	400
1600	400
1600	400
1600	400
1600	400
1600	400
1600	400
1600	400
1600	400
1600	400
1600	400
1600	400
1600	400
1600	400
1600	400
1600	400
1600	400
1600	400
1600	400
1600	400
1600	400
1600	400
1600	400
1600	400
1600	400
1600	400
1600	400
1600	400
1600	400
1600	800
1600	800
1600	800
1600	800
1600	800
1600	800
1600	800
1600	800
1600	800
1600	800
1600	800
1600	800
1600	800
1600	800
1600	800
1600	800
1600	800
1600	800
1600	800
1600	800
1600	800
1600	800
1600	800
1600	800
1600	800
1600	800
1600	800
1600	800
1600	800
1600	800
1600	800
1600	800
1600	800
1600	800
1600	800
1600	800
1600	800
1600	800
1600	800
1600	800
1600	800
1600	800
1600	800
1600	800
1600	800
1600	800
1600	800
1600	800
1600	800
1600	800
1600	800
1600	800
1600	800
1600	800
1600	800
1600	800
1600	800
1600	800
1600	800
1600	800
1600	800
1600	800
1600	800
1600	800
1600	800
1600	800
1600	800
1600	800
1600	800
1600	800
1600	800
1600	800
1600	800
1600	800
1600	800
1600	800
1600	800
1600	800
1600	800
1600	800
1600	800
1600	800
1600	800
1600	800
1600	800
1600	800
1600	800
1600	800
1600	800
1600	800
1600	800
1600	800
1600	800
1600	800
2000	800
2000	800
2000	800
2000	800
2000	800
2000	800
2000	800
2000	800
2000	800
2000	800
2000	800
2000	800
2000	800
2000	800
2000	800
2000	800
2000	800
2000	800
2000	800
2000	800
2000	800
2000	800
2000	800
2000	800
2000	800
2000	800
2000	800
2000	800
2000	800
2000	800
2000	800
2000	800
2000	800
2000	800
2000	800
2000	800
2000	800
2000	800
2000	800
2000	800
2000	800
2000	800
2000	800
2000	800
2000	800
2000	800
2000	800
2000	800
2000	800
2000	800
2000	800
2000	800
2000	800
2000	800
2000	800
2000	800
2000	800
[truncated: 9,567 more rows]

## Sheet: Supplementary Figure 2E
GSDIM counts per unit area
	Control	Stim1 smKO	20 Ab only
Cell 1	271.419	45.2825	34.0778
Cell 2	348.599	28.3039	44.0503
Cell 3	346.137	28.498	25.1969
Cell 4	359.929	30.6139	30.311
Cell 5	459.02	54.9792	23.8895
Cell 6	1003.79	167.393	68.5776
Cell 7	1274.94	139.683	60.3225
Cell 8	587.783	139.574	59.8777
Cell 9	1027.6	89.9455	38.6973
Cell 10	598.289	104.779	42.6545
Cell 11	917.057	95.8977	28.9646
Cell 12	789.408	112.952	25.7632
Cell 13	334.719	118.335	29.7872
Cell 14	1166.42	69.7484	25.6647
Cell 15	1027.68	106.164	35.0467
Cell 16	1036.57	125.412	20.9687
Cell 17	1235.56	95.3645	18.9905
Cell 18	976.943	106.839	28.2644
Minimum	271.4	28.3	18.99
25% Percentile	357.1	52.56	25.55
Median	853.2	100.3	30.05
75% Percentile	1030	120.1	43
Maximum	1275	167.4	68.58
Mean	764.5	92.21	35.62
Std. Deviation	349.3	41.3	14.37
Std. Error of Mean	82.34	9.733	3.388
Lower 95% CI	590.8	71.67	28.47
Upper 95% CI	938.3	112.7	42.76
1-way ANOVA summary
F	71.64
P value	<0.0001
Significant diff. among means (P < 0.05)?	Yes
Tukey's multiple comparisons test	Mean Diff.	95.00% CI of diff.	Below threshold?	Summary	Adjusted P Value
Control v Stim1 smKO	672.3	508.8 to 835.9	Yes	****	<0.0001
Control vs.20 Ab only	728.9	565.4 to 892.5	Yes	****	<0.0001
Stim1 smKO vs. 20 Ab only	56.59	-107.0 to 220.1	No	ns	0.683
