# Supplementary material for: STIM1-dependent peripheral coupling governs the contractility of vascular smooth muscle cells
Source: eLife. 2022 Feb 11;11:e70278. doi: 10.7554/eLife.70278 (PMC8947769; doi:10.7554/eLife.70278)
Supplement: Figure 1—figure supplement 3—source data 1. [file elife-70278-fig1-figsupp3-data1.xlsx]

## Sheet: Supplementary Figure 3B
STIM1 clusters per area	Vehicle	Thapsigargin
Cell 1	18.4913	11.909
Cell 2	18.2196	20.2186
Cell 3	14.8228	15.7799
Cell 4	15.981	21.5689
Cell 5	19.0585	13.4373
Cell 6	25.3629	13.0334
Cell 7	18.9913	17.711
Cell 8	24.2759	32.4527
Cell 9	19.0047	17.9415
Cell 10	22.433	22.738
Cell 11	22.363	20.6301
Cell 12	22.677	16.4081
Cell 13	23.1733	19.4812
Cell 14	21.9893	13.7116
Cell 15	25.2288	15.6898
Cell 16	13.0548	18.3974
Cell 17	25.461	17.8773
Cell 18	24.7772	20.3511
Cell 19	17.2197	16.0644
Cell 20	11.7587
Cell 21	13.3594
Cell 22	16.5917
Cell 23	18.749
Cell 24	13.7839
Cell 25	12.5346
Unpaired t test
P value	0.4713
P value summary	ns
Significantly different (P < 0.05)?	No
One- or two-tailed P value?	Two-tailed
Mean of column A	19.17
Mean of column B	18.18
Difference between means (B - A) ± SEM	-0.9955 ± 1.369
95% confidence interval	-3.759 to 1.768

## Sheet: Supplementary Figure 3C
Vehicle	Thapsigargin		Unpaired t test
400	400		P value	0.3712
400	400		P value summary	ns
400	400		Significantly different (P < 0.05)?	No
400	400		One- or two-tailed P value?	Two-tailed
400	400
400	400		Mean of column A	1746
400	400		Mean of column B	1763
400	400		Difference between means (B - A) ± SEM	16.26 ± 18.19
400	400		95% confidence interval	-19.38 to 51.91
400	400
400	400
400	400
400	400
400	400
400	400
400	400
400	400
400	400
400	400
400	400
400	400
400	400
400	400
400	400
400	400
400	400
400	400
400	400
400	400
400	400
400	400
400	400
400	400
400	400
400	400
400	400
400	400
400	400
400	400
400	400
400	400
400	400
400	400
400	400
400	400
400	400
400	400
400	400
400	400
400	400
400	400
400	400
400	400
400	400
400	400
400	400
400	400
400	400
400	400
400	400
400	400
400	400
400	400
400	400
400	400
400	400
400	400
400	400
400	400
400	400
400	400
400	400
400	400
400	400
400	400
400	400
400	400
400	400
400	400
400	400
400	400
400	400
400	400
400	400
400	400
400	400
400	400
400	400
400	400
400	400
400	400
400	400
400	400
400	400
400	400
400	400
400	400
400	400
400	400
400	400
400	400
400	400
400	400
400	400
400	400
400	400
400	400
400	400
400	400
400	400
400	400
400	400
400	400
400	400
400	400
400	400
400	400
400	400
400	400
400	400
400	400
400	400
400	400
400	400
400	400
400	400
400	400
400	400
400	400
400	400
400	400
400	400
400	400
400	400
400	400
400	400
400	400
400	400
400	400
400	400
400	400
400	400
400	400
400	400
400	400
400	400
400	400
400	400
400	400
400	400
400	400
400	400
400	400
400	400
400	400
400	400
400	400
400	400
400	400
400	400
400	400
400	400
400	400
400	400
400	400
400	400
400	400
400	400
400	400
400	400
400	400
400	400
400	400
400	400
400	400
400	400
400	400
400	400
400	400
400	400
400	400
400	400
400	400
400	400
400	400
400	800
400	800
400	800
400	800
400	800
400	800
400	800
400	800
400	800
400	800
400	800
400	800
400	800
400	800
400	800
400	800
400	800
400	800
400	800
400	800
400	800
400	800
400	800
400	800
400	800
400	800
400	800
400	800
400	800
400	800
400	800
400	800
400	800
400	800
400	800
400	800
400	800
400	800
400	800
400	800
400	800
400	800
400	800
400	800
400	800
400	800
400	800
400	800
400	800
400	800
400	800
400	800
400	800
400	800
400	800
400	800
400	800
400	800
400	800
400	800
400	800
400	800
400	800
400	800
400	800
400	800
400	800
400	800
400	800
400	800
400	800
400	800
400	800
400	800
400	800
400	800
400	800
400	800
400	800
400	800
400	800
400	800
400	800
400	800
400	800
400	800
400	800
400	800
400	800
400	800
400	800
400	800
400	800
400	800
400	800
400	800
400	800
400	1200
400	1200
400	1200
400	1200
400	1200
400	1200
400	1200
400	1200
400	1200
400	1200
400	1200
400	1200
400	1200
400	1200
400	1200
400	1200
400	1200
400	1200
400	1200
400	1200
400	1200
400	1200
400	1200
400	1200
400	1200
400	1200
400	1200
400	1200
400	1200
400	1200
400	1200
400	1200
400	1200
400	1200
400	1200
400	1200
400	1200
400	1200
400	1200
400	1200
400	1200
400	1200
400	1200
400	1200
400	1200
400	1200
400	1200
400	1200
400	1200
400	1200
400	1200
400	1200
400	1200
400	1600
400	1600
400	1600
400	1600
400	1600
400	1600
400	1600
400	1600
400	1600
400	1600
400	1600
400	1600
400	1600
400	1600
400	1600
400	1600
400	1600
400	1600
400	1600
400	1600
400	1600
400	1600
400	1600
400	1600
400	1600
400	1600
400	1600
400	1600
400	1600
400	1600
400	1600
400	1600
400	1600
400	1600
400	1600
400	1600
400	1600
400	1600
400	1600
400	2000
400	2000
400	2000
400	2000
400	2000
400	2000
400	2000
400	2000
400	2000
400	2000
400	2000
400	2000
400	2000
400	2000
400	2000
400	2000
400	2000
400	2000
400	2000
400	2000
400	2000
400	2000
400	2000
400	2000
400	2000
400	2000
400	2000
400	2000
400	2000
400	2000
400	2000
400	2000
400	2000
400	2000
400	2000
400	2000
400	2000
400	2000
400	2000
400	2000
400	2000
400	2000
400	2400
400	2400
400	2400
400	2400
400	2400
400	2400
400	2400
400	2400
400	2400
400	2400
400	2400
400	2400
400	2400
400	2400
400	2400
400	2400
400	2400
400	2400
400	2400
400	2400
400	2400
400	2400
400	2400
400	2400
400	2800
400	2800
400	2800
400	2800
400	2800
400	2800
400	2800
400	2800
400	2800
400	2800
400	2800
400	2800
400	2800
400	2800
400	2800
400	2800
400	2800
400	2800
400	2800
400	2800
400	2800
400	2800
400	2800
400	2800
800	3200
800	3200
800	3200
800	3200
800	3200
800	3200
800	3200
800	3200
800	3200
800	3200
800	3600
800	3600
800	3600
800	3600
800	3600
800	3600
800	3600
800	3600
800	3600
800	3600
800	3600
800	4000
800	4000
800	4000
800	4000
800	4000
800	4000
800	4000
800	4400
800	4400
800	4400
800	4400
800	4800
800	4800
800	4800
800	4800
800	4800
800	4800
800	5200
800	5200
800	5200
800	5600
800	5600
800	5600
800	5600
800	5600
800	6000
800	6000
800	6400
800	6800
800	6800
800	7200
800	7200
800	8000
800	12400
800	400
800	400
800	400
800	400
800	400
800	400
800	400
800	400
800	400
800	400
800	400
800	400
800	400
800	400
800	400
800	400
800	400
800	400
800	400
800	400
800	400
800	400
800	400
800	400
800	400
800	400
800	400
800	400
800	400
800	400
800	400
800	400
800	400
800	400
800	400
800	400
800	400
800	400
800	400
800	400
800	400
800	400
800	400
800	400
800	400
800	400
800	400
800	400
800	400
800	400
800	400
800	400
800	400
800	400
800	400
800	400
800	400
800	400
800	400
800	400
800	400
800	400
800	400
800	400
800	400
800	400
800	400
800	400
800	400
800	400
800	400
800	400
800	400
800	400
800	400
800	400
800	400
800	400
800	400
800	400
800	400
800	400
800	400
800	400
800	400
800	400
800	400
800	400
800	400
800	400
800	400
800	400
800	400
800	400
800	400
800	400
800	400
800	400
800	400
800	400
800	400
800	400
800	400
800	400
800	400
800	400
800	400
800	400
800	400
800	400
800	400
800	400
800	400
800	400
800	400
800	400
800	400
800	400
800	400
800	400
800	400
800	400
800	400
800	400
800	400
800	400
800	400
800	400
800	400
800	400
800	400
800	400
800	400
800	400
800	400
800	400
800	400
800	400
800	400
800	400
800	400
800	400
800	400
800	400
800	400
800	400
800	400
800	400
800	400
800	400
800	400
800	400
800	400
800	400
800	400
800	400
800	400
800	400
800	400
800	400
800	400
800	400
800	400
800	400
800	400
800	400
800	400
800	400
800	400
800	400
800	400
800	400
800	400
800	400
800	400
800	400
800	400
800	400
800	400
800	400
800	800
1200	800
1200	800
1200	800
1200	800
1200	800
1200	800
1200	800
1200	800
1200	800
1200	800
1200	800
1200	800
1200	800
1200	800
1200	800
1200	800
1200	800
1200	800
1200	800
1200	800
1200	800
1200	800
1200	800
1200	800
1200	800
1200	800
1200	800
1200	800
1200	800
1200	800
1200	800
1200	800
1200	800
1200	800
1200	800
1200	800
1200	800
1200	800
1200	800
1200	800
1200	800
1200	800
1200	800
1200	800
1200	800
1200	800
1200	800
1200	800
1200	800
1200	800
1200	800
1200	800
1200	800
1200	800
1200	800
1200	800
1200	800
1200	800
1200	800
1200	800
1200	800
1200	800
1200	800
1200	800
1200	800
1200	800
1200	800
1200	800
1200	800
1200	800
1200	800
1200	800
1200	800
1200	800
1200	800
1200	800
1200	800
1200	800
1200	800
1200	800
1200	800
1200	800
1200	800
1200	800
1200	800
1200	800
1200	800
1200	800
1200	800
1200	800
1200	800
1200	800
1200	800
1200	1200
1200	1200
1200	1200
1200	1200
1200	1200
1200	1200
1200	1200
1200	1200
1200	1200
1200	1200
1200	1200
1200	1200
1200	1200
1200	1200
1200	1200
1200	1200
1200	1200
1200	1200
1200	1200
1200	1200
1200	1200
1200	1200
1200	1200
1200	1200
1200	1200
1200	1200
1200	1200
1200	1200
1200	1200
1200	1200
1200	1200
1200	1200
1200	1200
1200	1200
1200	1200
1200	1200
1200	1200
1200	1200
1200	1200
1200	1200
1200	1200
1200	1200
1200	1200
1200	1200
1200	1200
1200	1200
1200	1200
1200	1200
1200	1200
1200	1200
1200	1200
1200	1200
1200	1200
1200	1200
1200	1200
1200	1600
1200	1600
1200	1600
1200	1600
1200	1600
1200	1600
1200	1600
1200	1600
1200	1600
1200	1600
1200	1600
1200	1600
1600	1600
1600	1600
1600	1600
1600	1600
1600	1600
1600	1600
1600	1600
1600	1600
1600	1600
1600	1600
1600	1600
1600	1600
1600	1600
1600	1600
1600	1600
1600	1600
1600	1600
1600	1600
1600	1600
1600	1600
1600	1600
1600	1600
1600	1600
1600	1600
1600	1600
1600	1600
1600	1600
1600	1600
1600	1600
1600	1600
1600	1600
1600	1600
1600	2000
1600	2000
1600	2000
1600	2000
1600	2000
1600	2000
1600	2000
1600	2000
1600	2000
1600	2000
1600	2000
1600	2000
1600	2000
1600	2000
1600	2000
1600	2000
1600	2000
1600	2000
1600	2000
1600	2000
1600	2000
1600	2000
1600	2000
1600	2000
1600	2000
1600	2000
1600	2000
1600	2000
1600	2000
1600	2000
1600	2000
1600	2000
1600	2000
1600	2000
1600	2000
1600	2000
1600	2400
1600	2400
1600	2400
1600	2400
1600	2400
1600	2400
1600	2400
1600	2400
1600	2400
1600	2400
1600	2400
1600	2400
1600	2400
1600	2400
1600	2400
1600	2400
1600	2400
1600	2400
1600	2400
1600	2400
1600	2400
1600	2400
1600	2400
1600	2400
1600	2400
1600	2400
1600	2400
1600	2400
1600	2800
1600	2800
1600	2800
1600	2800
1600	2800
1600	2800
1600	2800
1600	2800
1600	2800
1600	2800
1600	2800
1600	2800
1600	2800
1600	2800
1600	2800
1600	2800
1600	2800
1600	2800
1600	2800
1600	2800
1600	2800
1600	2800
1600	2800
1600	2800
1600	2800
1600	2800
1600	2800
1600	2800
1600	2800
1600	2800
1600	2800
1600	3200
1600	3200
1600	3200
1600	3200
1600	3200
1600	3200
2000	3200
2000	3200
2000	3200
2000	3200
2000	3200
2000	3200
2000	3200
2000	3600
2000	3600
2000	3600
2000	3600
2000	3600
2000	3600
2000	3600
2000	3600
2000	3600
2000	3600
2000	3600
2000	4000
2000	4000
2000	4000
2000	4000
2000	4000
2000	4000
2000	4000
2000	4000
2000	4000
2000	4000
2000	4000
2000	4000
2000	4000
2000	4000
2000	4000
2000	4000
2000	4400
2000	4400
2000	4400
2000	4400
2000	4400
2000	4400
2000	4400
2000	4800
2000	4800
2000	4800
2000	4800
2000	4800
2000	4800
2000	4800
2000	4800
2000	4800
2000	5200
2000	5200
2000	5200
2000	5200
2000	5200
2000	5200
2000	5200
2000	5200
2000	5600
2000	5600
2000	5600
2000	5600
2000	5600
2000	6000
2000	6000
2000	6000
2000	6000
2000	6000
2000	6000
2000	6000
2000	6000
2000	6400
2000	6400
2000	6800
2000	6800
2000	6800
2000	7200
2000	7600
2000	7600
2000	7600
2000	8000
2000	8000
2000	8400
2000	8400
2000	8800
2000	9200
2000	10400
2000	10400
2000	10800
2000	11200
2000	11600
2000	15600
2000	400
2000	400
2000	400
2000	400
2000	400
2000	400
2000	400
2000	400
2000	400
2000	400
2000	400
2000	400
2000	400
2000	400
2000	400
2000	400
2000	400
2000	400
2000	400
2000	400
2000	400
2000	400
2000	400
2000	400
2000	400
2000	400
2000	400
2000	400
2000	400
2000	400
2000	400
2000	400
2000	400
2000	400
2000	400
2400	400
2400	400
2400	400
2400	400
2400	400
2400	400
2400	400
2400	400
2400	400
2400	400
2400	400
2400	400
2400	400
2400	400
2400	400
2400	400
2400	400
2400	400
2400	400
2400	400
2400	400
2400	400
2400	400
2400	400
2400	400
2400	400
2400	400
2400	400
2400	400
2400	400
2400	400
2400	400
2400	400
2400	400
2400	400
2400	400
2400	400
2400	400
2400	400
2400	400
2400	400
2400	400
2400	400
2400	400
2400	400
2400	400
2400	400
2400	400
2400	400
2400	400
2400	400
2400	400
2400	400
2400	400
2400	400
2400	400
2400	400
2400	400
2400	400
2400	400
2400	400
2400	400
2400	400
2400	400
2400	400
2400	400
2400	400
2400	400
2400	400
2800	400
2800	400
2800	400
2800	400
2800	400
2800	400
2800	400
2800	400
2800	400
2800	400
2800	400
2800	400
2800	400
2800	400
2800	400
2800	400
2800	400
2800	400
2800	400
2800	400
2800	400
2800	400
2800	400
2800	400
2800	400
2800	400
2800	400
2800	400
2800	400
2800	400
2800	400
2800	400
2800	400
2800	400
2800	400
2800	400
2800	400
2800	400
2800	400
2800	400
2800	400
2800	400
2800	400
2800	400
2800	400
2800	400
2800	400
2800	400
2800	400
2800	400
2800	400
2800	400
2800	400
2800	400
2800	400
2800	400
2800	400
2800	400
2800	400
2800	400
2800	400
2800	400
2800	400
2800	400
2800	400
2800	400
2800	400
2800	400
2800	400
2800	800
3200	800
3200	800
3200	800
3200	800
3200	800
3200	800
3200	800
3200	800
3200	800
3200	800
3200	800
3200	800
3200	800
3200	800
3200	800
3200	800
3200	800
3200	800
3200	800
3200	800
3200	800
3200	800
3200	800
3200	800
3200	800
3200	800
3200	800
3200	800
3200	800
3200	800
3200	800
3200	800
3200	800
3200	800
3200	800
3200	800
3200	800
3200	800
3200	800
3200	800
3600	800
3600	800
3600	800
3600	800
3600	800
3600	800
3600	800
3600	800
3600	800
3600	800
3600	800
3600	800
3600	800
3600	800
3600	800
3600	800
3600	800
3600	800
3600	800
3600	800
3600	800
3600	800
3600	800
3600	800
3600	800
3600	800
3600	800
3600	800
3600	800
3600	800
3600	800
4000	800
4000	800
4000	800
4000	800
4000	800
4000	800
4000	800
4000	800
4000	800
4000	800
4000	800
4000	1200
4000	1200
4000	1200
4000	1200
4000	1200
4000	1200
4000	1200
4000	1200
4000	1200
4000	1200
4000	1200
4400	1200
4400	1200
4400	1200
4400	1200
4400	1200
4400	1200
4400	1200
4400	1200
4400	1200
4400	1200
4400	1200
4400	1200
4800	1200
4800	1200
4800	1200
4800	1200
4800	1200
4800	1200
4800	1200
4800	1200
4800	1200
4800	1200
4800	1200
4800	1200
4800	1200
4800	1200
4800	1200
4800	1200
4800	1200
4800	1200
4800	1200
4800	1200
4800	1200
5200	1200
5200	1200
5200	1200
5200	1200
5200	1200
5200	1200
5200	1200
5200	1200
5200	1200
5200	1200
5600	1200
5600	1200
5600	1200
5600	1200
5600	1200
5600	1200
5600	1200
5600	1200
5600	1200
5600	1200
5600	1200
6000	1200
6000	1200
6000	1200
6000	1200
6000	1200
6000	1200
6000	1200
6000	1200
6000	1200
6000	1200
6400	1200
6400	1200
6400	1200
6400	1200
6400	1200
6400	1200
6400	1200
6400	1200
6400	1600
6400	1600
6800	1600
6800	1600
6800	1600
6800	1600
6800	1600
6800	1600
6800	1600
6800	1600
7200	1600
7200	1600
7200	1600
7200	1600
7200	1600
7600	1600
7600	1600
7600	1600
7600	1600
7600	1600
7600	1600
7600	1600
8000	1600
8000	1600
8400	1600
8400	1600
8800	1600
8800	1600
9200	1600
9600	1600
10800	1600
14800	1600
14800	1600
400	1600
400	1600
400	1600
400	1600
400	1600
400	1600
400	1600
400	1600
400	1600
400	1600
400	1600
400	1600
400	1600
400	1600
400	1600
400	1600
400	1600
400	1600
400	1600
400	1600
400	1600
400	1600
400	1600
400	1600
400	1600
400	1600
400	1600
400	1600
400	1600
400	1600
400	1600
400	1600
400	1600
400	1600
400	1600
400	1600
400	1600
400	1600
400	1600
400	1600
400	1600
400	1600
400	1600
400	1600
400	1600
400	1600
400	1600
400	1600
400	1600
400	1600
400	1600
400	1600
400	2000
400	2000
400	2000
400	2000
400	2000
400	2000
400	2000
400	2000
400	2000
400	2000
400	2000
400	2000
400	2000
400	2000
400	2000
400	2000
400	2000
400	2000
400	2000
400	2000
400	2000
400	2000
400	2000
400	2000
400	2000
400	2000
400	2000
400	2000
400	2000
400	2000
400	2000
400	2000
400	2000
400	2000
400	2000
400	2000
400	2000
400	2000
400	2000
400	2000
400	2000
400	2000
400	2000
400	2000
400	2000
400	2000
400	2000
400	2000
400	2000
400	2000
400	2000
400	2000
400	2000
400	2000
400	2000
400	2000
400	2000
400	2000
400	2000
400	2000
400	2000
400	2000
400	2000
400	2000
400	2000
400	2000
400	2000
400	2000
400	2000
400	2000
400	2000
400	2000
400	2000
400	2000
400	2400
400	2400
400	2400
400	2400
400	2400
400	2400
400	2400
400	2400
400	2400
400	2400
400	2400
400	2400
400	2400
400	2400
400	2400
400	2400
400	2400
400	2400
400	2400
400	2400
400	2400
400	2400
400	2400
400	2400
400	2400
400	2400
400	2400
400	2400
400	2400
400	2400
400	2400
400	2400
400	2400
400	2400
400	2400
400	2400
400	2400
400	2400
400	2400
400	2400
400	2400
400	2400
400	2400
400	2400
400	2400
400	2400
400	2400
400	2400
400	2400
400	2400
400	2400
400	2400
400	2400
400	2400
400	2800
400	2800
400	2800
400	2800
400	2800
400	2800
400	2800
400	2800
400	2800
400	2800
400	2800
400	2800
400	2800
400	2800
400	2800
400	2800
400	2800
400	2800
400	2800
400	2800
400	2800
400	2800
400	2800
400	2800
400	2800
400	2800
400	2800
400	2800
400	2800
400	2800
400	2800
400	2800
400	2800
400	2800
400	2800
400	2800
400	2800
400	3200
400	3200
400	3200
400	3200
400	3200
400	3200
400	3200
400	3200
400	3200
400	3200
400	3200
400	3200
400	3200
400	3200
400	3200
400	3200
400	3200
400	3200
400	3200
400	3200
400	3200
400	3200
400	3600
400	3600
400	3600
400	3600
400	3600
400	3600
400	3600
400	3600
400	3600
400	3600
400	3600
400	3600
400	3600
400	3600
400	3600
400	3600
400	3600
400	3600
400	3600
400	3600
400	3600
400	3600
400	3600
400	3600
400	3600
400	3600
400	4000
400	4000
400	4000
400	4000
400	4000
400	4000
400	4000
400	4000
400	4000
400	4000
400	4000
400	4000
400	4000
400	4000
400	4000
400	4000
400	4000
400	4000
400	4400
400	4400
400	4400
400	4400
400	4400
400	4400
400	4400
400	4400
400	4400
400	4800
400	4800
400	4800
400	4800
400	4800
400	4800
400	4800
400	4800
400	5200
400	5200
400	5200
400	5200
400	5200
400	5200
400	5200
400	5200
400	5200
400	5200
400	5200
400	5200
400	5200
400	5200
400	5200
400	5600
400	5600
400	5600
400	5600
400	5600
400	5600
400	5600
400	5600
400	5600
400	5600
400	5600
400	5600
400	5600
400	6000
400	6000
400	6000
400	6000
400	6000
400	6400
400	6800
400	6800
400	6800
400	6800
400	6800
400	6800
400	7200
400	7200
400	8000
400	8000
400	8400
400	8800
400	8800
400	8800
400	8800
400	9200
400	9600
400	10400
400	10400
400	10800
400	10800
400	12400
400	12400
400	14000
400	16000
400	18000
400	18400
400	400
400	400
400	400
400	400
400	400
400	400
400	400
400	400
400	400
400	400
400	400
400	400
400	400
400	400
400	400
400	400
400	400
400	400
400	400
400	400
400	400
400	400
400	400
400	400
400	400
400	400
400	400
400	400
400	400
400	400
400	400
400	400
400	400
400	400
400	400
400	400
400	400
400	400
400	400
400	400
400	400
400	400
400	400
400	400
400	400
400	400
400	400
400	400
400	400
400	400
400	400
400	400
400	400
400	400
400	400
400	400
400	400
400	400
400	400
400	400
400	400
400	400
400	400
400	400
400	400
400	400
400	400
400	400
400	400
400	400
400	400
400	400
400	400
400	400
400	400
400	400
400	400
400	400
400	400
400	400
400	400
400	400
400	400
400	400
400	400
400	400
400	400
400	400
400	400
400	400
400	400
400	400
400	400
400	400
400	400
400	400
400	400
400	400
400	400
400	400
400	400
400	400
400	400
400	400
400	400
400	400
400	400
400	400
400	400
400	400
400	400
400	400
400	400
400	400
400	400
400	400
400	400
400	400
400	400
400	400
400	400
400	400
400	400
400	400
400	400
400	400
400	400
400	400
800	400
800	400
800	400
800	400
800	400
800	400
800	400
800	400
800	400
800	400
800	400
800	400
800	400
800	400
800	400
800	400
800	400
800	400
800	400
800	400
800	400
800	400
800	400
800	400
800	400
800	400
800	400
800	400
800	400
800	400
800	400
800	400
800	400
800	400
800	400
800	400
800	400
800	400
800	400
800	400
800	400
800	400
800	400
800	400
800	400
800	400
800	400
800	400
800	400
800	400
800	400
800	400
800	400
[truncated: 29,780 more rows]

## Sheet: Supplementary Figure 3D
Time (min)	Proliferative SMC (F340/F380)	Contractile SMC (F340/F380)
0.00767	0.5867	0.51
0.041	0.585	0.5367
0.0732	0.5792	0.54
0.1057	0.6088	0.5133
0.1378	0.5992	0.5367
0.1702	0.6079	0.5267
0.2025	0.6208	0.5233
0.2348	0.66	0.52
0.267	0.6729	0.5333
0.2993	0.7121	0.5267
0.3315	0.7371	0.53
0.3638	0.7733	0.53
0.3962	0.8013	0.5367
0.4285	0.8288	0.55
0.4608	0.8679	0.5433
0.493	0.8967	0.5533
0.5253	0.9013	0.5567
0.5577	0.9175	0.5833
0.59	0.9421	0.5833
0.6222	0.965	0.58
0.6545	0.9863	0.5867
0.6867	0.9904	0.6067
0.719	1.0029	0.5967
0.7513	1.0083	0.61
0.7837	1.0308	0.6233
0.816	1.0379	0.63
0.8482	1.0367	0.65
0.8805	1.0308	0.6533
0.9128	1.0483	0.65
0.9452	1.0458	0.67
0.9775	1.0554	0.6767
1.0097	1.0713	0.6867
1.042	1.0704	0.6833
1.0742	1.0808	0.6967
1.1067	1.0617	0.71
1.1388	1.0683	0.7067
1.1712	1.0808	0.71
1.2035	1.065	0.7067
1.2358	1.0779	0.75
1.268	1.0708	0.74
1.3003	1.0692	0.7333
1.3327	1.0708	0.7533
1.365	1.0629	0.76
1.3972	1.0771	0.75
1.4295	1.0725	0.7667
1.4618	1.0654	0.7667
1.4942	1.0588	0.77
1.5263	1.0613	0.7833
1.5585	1.0521	0.77
1.591	1.0508	0.7833
1.6233	1.0562	0.79
1.6553	1.0538	0.8033
1.6878	1.0629	0.8033
1.72	1.0408	0.8067
1.7523	1.0658	0.7933
1.7845	1.0467	0.82
1.817	1.0521	0.81
1.8492	1.0288	0.81
1.8815	1.0442	0.8233
1.9138	1.035	0.8067
1.9462	1.0425	0.82
1.9785	1.0433	0.8167
2.0107	1.0275	0.8167
2.043	1.0304	0.82
2.0752	1.0163	0.8333
2.1077	1.0258	0.8233
2.1398	1.0221	0.82
2.172	1.02	0.8167
2.2045	1.0196	0.8167
2.2367	1.0063	0.8033
2.269	1.0213	0.8167
2.3012	1.0054	0.8133
2.3337	1.0208	0.8067
2.366	0.9954	0.8233
2.3982	1.0113	0.82
2.4305	0.9996	0.8
2.4627	1.0013	0.7967
2.4952	1	0.7967
2.5273	1.0025	0.8033
2.5595	0.9946	0.8067
2.592	0.9725	0.8067
2.6243	0.9804	0.81
2.6565	0.9808	0.8267
2.6888	0.9788	0.8133
2.721	0.9858	0.8133
2.7535	0.9829	0.8167
2.7857	0.9758	0.7933
2.818	0.9742	0.8
2.8503	0.9725	0.81
2.8827	0.9733	0.7967
2.9147	0.9688	0.8167
2.947	0.9667	0.7967
2.9793	0.96	0.8067
3.0438	0.9483	0.7867
3.1085	0.9567	0.8
3.1408	0.9563	0.81
3.1732	0.9429	0.7967
3.2055	0.9479	0.7867
3.2377	0.9321	0.7833
3.27	0.9363	0.78
3.3022	0.9504	0.77
3.3347	0.9367	0.7767
3.367	0.9254	0.7733
3.3992	0.9296	0.7767
3.4313	0.9283	0.7633
3.4962	0.9392	0.7733
3.5283	0.9267	0.7633
3.5605	0.9246	0.77
3.593	0.9233	0.7733
3.6253	0.9208	0.76
3.6575	0.9088	0.7733
3.7222	0.9083	0.7733
3.7545	0.9238	0.76
3.7867	0.8983	0.76
3.8188	0.9113	0.77
3.8513	0.8946	0.7533
3.8835	0.9104	0.7567
3.9158	0.8958	0.7433
3.948	0.8996	0.75
3.9805	0.8779	0.7433
4.045	0.8842	0.7367
4.0773	0.8833	0.74
4.1095	0.8817	0.7333
4.1418	0.8717	0.7367
4.1742	0.8804	0.74
4.2063	0.8733	0.73
4.2387	0.8771	0.7267
4.271	0.8738	0.7333
4.3033	0.8692	0.73
4.3357	0.8625	0.7267
4.368	0.8696	0.72
4.4002	0.8525	0.73
4.4325	0.8529	0.7167
4.4648	0.8471	0.7167
4.4972	0.8563	0.7267
4.5293	0.8442	0.6967
4.5617	0.845	0.7167
4.594	0.8454	0.7033
4.6263	0.8496	0.7133
4.6585	0.8492	0.7067
4.6908	0.8333	0.7033
4.723	0.8254	0.7
4.7555	0.8213	0.7133
4.7877	0.8088	0.6933
4.8198	0.8242	0.6967
4.8523	0.8167	0.7033
4.8845	0.8117	0.69
4.9168	0.8171	0.6967
4.9492	0.8146	0.6933
4.9815	0.7979	0.69
5.0137	0.8104	0.6833
5.046	0.8054	0.7
5.0783	0.8038	0.6867
5.1107	0.8033	0.6767
5.1428	0.7967	0.6833
5.2075	0.7871	0.6767
5.2398	0.7846	0.69
5.272	0.7713	0.6833
5.3043	0.7863	0.69
5.3367	0.7838	0.66
5.3688	0.7788	0.6667
5.4012	0.775	0.67
5.4333	0.7725	0.67
5.4658	0.7829	0.6533
5.4982	0.7683	0.6767
5.5303	0.7658	0.6633
5.5627	0.76	0.6633
5.595	0.7558	0.6733
5.6272	0.7517	0.6567
5.6595	0.7533	0.6733
5.6918	0.7625	0.67
5.7242	0.7533	0.6767
5.7563	0.7479	0.65
5.7887	0.76	0.65
5.8208	0.7446	0.64
5.8533	0.7492	0.6633
5.8855	0.7429	0.64
5.9178	0.7479	0.6467
5.9502	0.73	0.64
5.9825	0.7363	0.66
6.0147	0.7271	0.6433
6.047	0.7321	0.6333
6.0792	0.7342	0.6433
6.1115	0.7292	0.6467
6.1438	0.7283	0.6367
6.1762	0.7188	0.6367
6.2085	0.7238	0.6267
6.2407	0.7179	0.64
6.273	0.715	0.6467
6.3053	0.7183	0.63
6.3377	0.7167	0.63
6.3698	0.7067	0.6167
6.4022	0.7142	0.6233
6.4345	0.6958	0.6267
6.4667	0.7017	0.6367
6.4992	0.7038	0.62
6.5313	0.7025	0.6333
6.5637	0.6983	0.6267
6.596	0.6867	0.62
6.6282	0.6958	0.64
6.6605	0.7021	0.6167
6.6927	0.7063	0.61
6.7252	0.6929	0.61
6.7573	0.6842	0.61
6.7897	0.6796	0.6133
6.822	0.6871	0.61
6.8543	0.6775	0.6233
6.8865	0.675	0.6167
6.9187	0.6783	0.6033
6.951	0.6717	0.6167
6.9835	0.6763	0.5867
7.0157	0.6688	0.61
7.048	0.6725	0.5933
7.0803	0.6754	0.61
7.1125	0.6733	0.6067
7.1448	0.6646	0.6
7.1772	0.6725	0.6067
7.2095	0.6696	0.6133
7.2418	0.6629	0.5967
7.274	0.6675	0.62
7.3063	0.6667	0.61
7.3385	0.6517	0.6133
7.3708	0.6563	0.6133
7.4032	0.6613	0.6
7.4355	0.6613	0.6
7.4678	0.6529	0.5967
7.5002	0.6529	0.6067
7.5323	0.6613	0.6
7.5645	0.6483	0.5933
7.597	0.6471	0.5967
7.6292	0.6446	0.6033
7.6615	0.6446	0.5867
7.6937	0.6463	0.5967
7.726	0.6546	0.6
7.7583	0.6496	0.5933
7.7905	0.6442	0.59
7.823	0.6504	0.5967
7.8553	0.64	0.59
7.8875	0.63	0.5867
7.9198	0.63	0.6033
7.952	0.6408	0.5967
7.9845	0.6375	0.5833
8.0167	0.6338	0.5767
8.049	0.6342	0.6067
8.0813	0.6371	0.58
8.1137	0.64	0.5867
8.1458	0.6392	0.6033
8.1782	0.6313	0.59
8.2103	0.6175	0.6
8.2427	0.6263	0.6033
8.275	0.6175	0.6133
8.3072	0.6038	0.6033
8.3397	0.6204	0.5867
8.3718	0.615	0.5933
8.4042	0.6142	0.5967
8.4363	0.6121	0.5867
8.4688	0.6138	0.5867
8.6302	0.5983	0.5833
8.6625	0.6238	0.5833
8.6947	0.655	0.5967
8.7272	0.6833	0.59
8.7593	0.69	0.58
8.7917	0.7117	0.58
8.824	0.7204	0.59
8.8563	0.7388	0.6033
8.8885	0.7683	0.5833
8.9208	0.7708	0.5967
8.953	0.7888	0.5867
8.9855	0.8138	0.5733
9.0177	0.8404	0.59
9.0498	0.8783	0.5767
9.0823	0.9446	0.5767
9.1145	0.9788	0.5933
9.1468	1.0404	0.5767
9.1792	1.1021	0.5933
9.2115	1.1413	0.5833
9.2437	1.1754	0.5933
9.276	1.2167	0.5833
9.3082	1.2404	0.6033
9.3407	1.2596	0.58
9.3728	1.2733	0.58
9.4052	1.3	0.58
9.4373	1.3004	0.5733
9.4698	1.3204	0.5833
9.502	1.325	0.5833
9.5343	1.3454	0.5867
9.5667	1.3558	0.5867
9.599	1.3554	0.58
9.6312	1.3575	0.59
9.6635	1.3525	0.5867
9.6957	1.365	0.5933
9.7282	1.3646	0.5867
9.7603	1.3617	0.58
9.7927	1.3538	0.5933
9.825	1.3654	0.58
9.8572	1.3646	0.5633
9.8893	1.3733	0.5767
9.9218	1.3571	0.5867
9.9542	1.36	0.57
9.9863	1.3621	0.58
10.0185	1.3738	0.5833
10.051	1.3696	0.58
10.0833	1.3808	0.5833
10.1155	1.3767	0.5833
10.1478	1.3867	0.5867
10.1802	1.3796	0.5667
10.2125	1.3721	0.58
10.2447	1.3563	0.59
10.2768	1.3913	0.5667
10.3093	1.3671	0.5767
10.3415	1.3921	0.58
10.3738	1.3767	0.57
10.406	1.3758	0.5833
10.4385	1.3979	0.5833
10.4707	1.3888	0.5767
10.503	1.3992	0.58
10.5353	1.4021	0.5867
10.5677	1.3967	0.58
10.5998	1.3821	0.5767
10.6322	1.3679	0.5767
10.6645	1.3921	0.5833
10.6967	1.4092	0.5733
10.729	1.4125	0.57
10.7613	1.3813	0.58
10.7937	1.4042	0.5767
10.8258	1.3704	0.5733
10.8582	1.3892	0.5767

## Sheet: Supplementary Figure 3E
Proliferative SMC			Contractile SMC				Unpaired t test
Mean	SEM	N	Mean	SEM	N		P value	<0.0001
100	10.26	6	10.26	2.01	6		P value summary	****
							Significantly different (P < 0.05)?	Yes
							One- or two-tailed P value?	Two-tailed
							Mean of column A	100
							Mean of column B	10.26
							Difference between means (B - A) ± SEM	-89.74 ± 10.46
							95% confidence interval	-113.0 to -66.44
