# Supplementary material for: STIM1-dependent peripheral coupling governs the contractility of vascular smooth muscle cells
Source: eLife. 2022 Feb 11;11:e70278. doi: 10.7554/eLife.70278 (PMC8947769; doi:10.7554/eLife.70278)
Supplement: Figure 1—source data 1. [file elife-70278-fig1-data1.xlsx]

## Sheet: Figure 1A
Densitometric analysis (STIM1 protein expression normalized to total protein)	CA SM			MA SM			Aortic SM			Colon SM			Bladder SM			Brain SM
	Control	STIM1 smKO		Control	STIM1 smKO		Control	STIM1 smKO		Control	STIM1 smKO		Control	STIM1 smKO		Control	STIM1 smKO
Mouse 1	0.993702	0.58164		0.94314	0.215018		0.148309	0.012904		0.335439	0.0492491		0.466405	0.0339941		0.199673	0.241237
Mouse 2	1.07557	0.025449		0.347217	0.0179918		0.137559	0.0322651		0.582692	0.0520291		0.403247	0.0260954		0.255553	0.226438
Mouse 3	0.682109	0.12702		0.54013	0.279277		0.170438	0.0100216		0.203534	0.0577064		0.409002	0.0180254		0.0909452	0.0772219
Mouse 4		0.18117		0.762956	0.0467805		0.0906517	0.0180747		0.262908	0.043363		0.232044			0.0378855	0.104734
Mouse 5							0.179387	0.0233786								0.156899	0.133482
Mouse 6							0.103894	0.0299601								0.139205	0.120084
Minimum	0.6821	0.02545		0.3472	0.01799		0.09065	0.01002		0.2035	0.04336		0.232	0.01803		0.03789	0.07722
25% Percentile	0.6821	0.05084		0.3954	0.02519		0.1006	0.01218		0.2184	0.04483		0.2748	0.01803		0.07768	0.09786
Median	0.9937	0.1541		0.6515	0.1309		0.1429	0.02073		0.2992	0.05064		0.4061	0.0261		0.1481	0.1268
75% Percentile	1.076	0.4815		0.8981	0.2632		0.1727	0.03054		0.5209	0.05629		0.4521	0.03399		0.2136	0.2301
Maximum	1.076	0.5816		0.9431	0.2793		0.1794	0.03227		0.5827	0.05771		0.4664	0.03399		0.2556	0.2412
Mean	0.9171	0.2288		0.6484	0.1398		0.1384	0.0211		0.3461	0.05059		0.3777	0.02604		0.1467	0.1505
Std. Deviation	0.2076	0.2439		0.2598	0.1273		0.03543	0.009027		0.1667	0.005965		0.1012	0.007985		0.07716	0.06735
Std. Error of Mean	0.1199	0.122		0.1299	0.06364		0.01446	0.003685		0.08333	0.002982		0.05059	0.00461		0.0315	0.02749
Lower 95% CI	0.4014	-0.1593		0.235	-0.06277		0.1012	0.01163		0.08094	0.0411		0.2167	0.006204		0.06572	0.07986
Upper 95% CI	1.433	0.6169		1.062	0.3423		0.1756	0.03057		0.6114	0.06008		0.5387	0.04587		0.2277	0.2212
Unpaired t test
P value	0.0112			0.0126			<0.0001			0.0122			0.002			0.9286
Significantly different (P < 0.05)?	Yes			Yes			Yes			Yes			Yes			No
One- or two-tailed P value?	Two-tailed			Two-tailed			Two-tailed			Two-tailed			Two-tailed			Two-tailed
Mean of column A	0.9171			0.6484			0.1384			0.3461			0.3777			0.1467
Mean of column B	0.2288			0.1398			0.0211			0.05059			0.02604			0.1505
Difference between means (B - A) ± SEM	-0.6883 ± 0.1757			-0.5086 ± 0.1446			-0.1173 ± 0.01493			-0.2956 ± 0.08339			-0.3516 ± 0.05999			0.003839 ± 0.04181
95% confidence interval	-1.140 to -0.2366			-0.8625 to -0.1547			-0.1505 to -0.08402			-0.4996 to -0.09151			-0.5058 to -0.1974			-0.08932 to 0.09700

## Sheet: Figure 1C
Areas of all STIM1 clusters (nm2)		Number of values	42726
400
400		Minimum	400
400		Maximum	196000
400		Range	195600
400
400		Mean	2135
400		Std. Deviation	4305
400		Std. Error of Mean	20.83
400
400
400
400
400
400
400
400
400
400
400
400
400
400
400
400
400
400
400
400
400
400
400
400
400
400
400
400
400
400
400
400
400
400
400
400
400
400
400
400
400
400
400
400
400
400
400
400
400
400
400
400
400
400
400
400
400
400
400
400
400
400
400
400
400
400
400
400
400
400
400
400
400
400
400
400
400
400
400
400
400
400
400
400
400
400
400
400
400
400
400
400
400
400
400
400
400
400
400
400
400
400
400
400
400
400
400
400
400
400
400
400
400
400
400
400
400
400
400
400
400
400
400
400
400
400
400
400
400
400
400
400
400
400
400
400
400
400
400
400
400
400
400
400
400
400
400
400
400
400
400
400
400
400
400
400
400
400
400
400
400
400
400
400
400
400
400
400
400
400
400
400
400
400
400
400
400
400
400
400
400
400
400
400
400
400
400
400
400
400
400
400
400
400
400
400
400
400
400
400
400
400
400
400
400
400
400
400
400
400
400
400
400
400
400
400
400
400
400
400
400
400
400
400
400
400
400
400
400
400
400
400
400
400
400
400
400
400
400
400
400
400
400
400
400
400
400
400
400
400
400
400
400
400
400
400
400
400
400
400
400
400
400
400
400
400
400
400
400
400
400
400
400
400
400
400
400
400
400
400
400
400
400
400
400
400
400
400
400
400
400
400
400
400
400
400
400
400
400
400
400
400
400
400
400
400
400
400
400
400
400
400
400
400
400
400
400
400
400
400
400
400
400
400
400
400
400
400
400
400
400
400
400
400
400
400
400
400
400
400
400
400
400
400
400
400
400
400
400
400
400
400
400
400
400
400
400
400
400
400
400
400
400
400
400
400
400
400
400
400
400
400
400
400
400
400
400
400
400
400
400
400
400
400
400
400
400
400
400
400
400
400
400
400
400
400
400
400
400
400
400
400
400
400
400
400
400
400
400
400
400
400
400
400
400
400
400
400
400
400
400
400
400
400
400
400
400
400
400
400
400
400
400
400
400
400
400
400
400
400
400
400
400
400
400
400
400
400
400
400
400
400
400
400
400
400
400
400
400
400
400
400
400
400
400
400
400
400
400
400
400
400
400
400
400
400
400
400
400
400
400
400
400
400
400
400
400
400
400
400
400
400
400
400
400
400
400
400
400
400
400
400
400
400
400
400
400
400
400
400
400
400
400
400
400
400
400
400
400
400
400
400
400
400
400
400
400
400
400
400
400
400
400
400
400
400
400
400
400
400
400
400
400
400
400
400
400
400
400
400
400
400
400
400
400
400
400
400
400
400
400
400
400
400
400
400
400
400
400
400
400
400
400
400
400
400
400
400
400
400
400
400
400
400
400
400
400
400
400
400
400
400
400
400
400
400
400
400
400
400
400
400
400
400
400
400
400
400
400
400
400
400
400
400
400
400
400
400
400
400
400
400
400
400
400
400
400
400
400
400
400
400
400
400
400
400
400
400
400
400
400
400
400
400
400
400
400
400
400
400
400
400
400
400
400
400
400
400
400
400
400
400
400
400
400
400
400
400
400
400
400
400
400
400
400
400
400
400
400
400
400
400
400
400
400
400
400
400
400
400
400
400
400
400
400
400
400
400
400
400
400
400
400
400
400
400
400
400
400
400
400
400
400
400
400
400
400
400
400
400
400
400
400
400
400
400
400
400
400
400
400
400
400
400
400
400
400
400
400
400
400
400
400
400
400
400
400
400
400
400
400
400
400
400
400
400
400
400
400
400
400
400
400
400
400
400
400
400
400
400
400
400
400
400
800
800
800
800
800
800
800
800
800
800
800
800
800
800
800
800
800
800
800
800
800
800
800
800
800
800
800
800
800
800
800
800
800
800
800
800
800
800
800
800
800
800
800
800
800
800
800
800
800
800
800
800
800
800
800
800
800
800
800
800
800
800
800
800
800
800
800
800
800
800
800
800
800
800
800
800
800
800
800
800
800
800
800
800
800
800
800
800
800
800
800
800
800
800
800
800
800
800
800
800
800
800
800
800
800
800
800
800
800
800
800
800
800
800
800
800
800
800
800
800
800
800
800
800
800
800
800
800
800
800
800
800
800
800
800
800
800
800
800
800
800
800
800
800
800
800
800
800
800
800
800
800
800
800
800
800
800
800
800
800
800
800
800
800
800
800
800
800
800
800
800
800
800
800
800
800
800
800
800
800
800
800
800
800
800
800
800
800
800
800
800
800
800
800
800
800
800
800
800
800
800
800
800
800
800
800
800
800
800
800
800
800
800
800
800
800
800
800
800
800
800
800
800
800
800
800
800
800
800
800
800
800
800
800
800
800
800
800
800
800
800
800
800
800
800
800
800
800
800
800
800
800
800
800
800
800
800
800
800
800
800
800
800
800
800
800
800
800
800
800
800
800
800
800
800
800
800
800
800
800
800
800
800
800
800
800
800
800
800
800
800
800
800
800
800
800
800
800
800
800
800
800
800
800
800
800
800
800
800
800
800
800
800
800
800
800
800
800
800
800
800
800
800
800
800
800
800
800
800
800
800
800
800
800
800
800
800
800
800
800
800
800
1200
1200
1200
1200
1200
1200
1200
1200
1200
1200
1200
1200
1200
1200
1200
1200
1200
1200
1200
1200
1200
1200
1200
1200
1200
1200
1200
1200
1200
1200
1200
1200
1200
1200
1200
1200
1200
1200
1200
1200
1200
1200
1200
1200
1200
1200
1200
1200
1200
1200
1200
1200
1200
1200
1200
1200
1200
1200
1200
1200
1200
1200
1200
1200
1200
1200
1200
1200
1200
1200
1200
1200
1200
1200
1200
1200
1200
1200
1200
1200
1200
1200
1200
1200
1200
1200
1200
1200
1200
1200
1200
1200
1200
1200
1200
1200
1200
1200
1200
1200
1200
1200
1200
1200
1200
1200
1200
1200
1200
1200
1200
1200
1200
1200
1200
1200
1200
1200
1200
1200
1200
1200
1200
1200
1200
1200
1200
1200
1200
1200
1200
1200
1200
1200
1200
1200
1200
1200
1200
1200
1200
1200
1200
1200
1200
1200
1200
1200
1200
1200
1200
1200
1200
1200
1200
1200
1200
1200
1200
1200
1200
1200
1200
1200
1200
1200
1200
1200
1200
1200
1200
1200
1200
1200
1200
1200
1200
1200
1200
1200
1200
1200
1200
1200
1200
1200
1200
1200
1200
1200
1200
1200
1200
1200
1200
1200
1200
1200
1200
1200
1200
1200
1200
1200
1200
1200
1200
1200
1200
1200
1200
1200
1200
1200
1600
1600
1600
1600
1600
1600
1600
1600
1600
1600
1600
1600
1600
1600
1600
1600
1600
1600
1600
1600
1600
1600
1600
1600
1600
1600
1600
1600
1600
1600
1600
1600
1600
1600
1600
1600
1600
1600
1600
1600
1600
1600
1600
1600
1600
1600
1600
1600
1600
1600
1600
1600
1600
1600
1600
1600
1600
1600
1600
1600
1600
1600
1600
1600
1600
1600
1600
1600
1600
1600
1600
1600
1600
1600
1600
1600
1600
1600
1600
1600
1600
1600
1600
1600
1600
1600
1600
1600
1600
1600
1600
1600
1600
1600
1600
1600
1600
1600
1600
1600
1600
1600
1600
1600
1600
1600
1600
1600
1600
1600
1600
1600
1600
1600
1600
1600
1600
1600
1600
1600
1600
1600
1600
1600
1600
1600
1600
1600
1600
1600
1600
1600
1600
1600
1600
1600
1600
1600
1600
1600
1600
1600
1600
1600
1600
1600
1600
1600
1600
1600
1600
1600
1600
1600
1600
1600
1600
1600
2000
2000
2000
2000
2000
2000
2000
2000
2000
2000
2000
2000
2000
2000
2000
2000
2000
2000
2000
2000
2000
2000
2000
2000
2000
2000
2000
2000
2000
2000
2000
2000
2000
2000
2000
2000
2000
2000
2000
2000
2000
2000
2000
2000
2000
2000
2000
2000
2000
2000
2000
2000
2000
2000
2000
2000
2000
2000
2000
2000
2000
2000
2000
2000
2000
2000
2000
2000
2000
2000
2000
2000
2000
2000
2000
2000
2000
2000
2000
2000
2000
2000
2000
2000
2000
2000
2000
2000
2000
2000
2000
2000
2000
2000
2000
2000
2000
2000
2000
2000
2000
2000
2000
2000
2000
2000
2000
2000
2000
2000
2000
2000
2000
2000
2000
2000
2400
2400
2400
2400
2400
2400
2400
2400
2400
2400
2400
2400
2400
2400
2400
2400
2400
2400
2400
2400
2400
2400
2400
2400
2400
2400
2400
2400
2400
2400
2400
2400
2400
2400
2400
2400
2400
2400
2400
2400
2400
2400
2400
2400
2400
2400
2400
2400
2400
2400
2400
2400
2400
2400
2400
2400
2400
2400
2400
2400
2400
2400
2400
2400
2400
2400
2400
2400
2400
2400
2400
2400
2400
2400
2400
2400
2400
2400
2400
2400
2400
2400
2400
2400
2400
2400
2400
2400
2400
2400
2400
2400
2400
2400
2400
2400
2400
2400
2800
2800
2800
2800
2800
2800
2800
2800
2800
2800
2800
2800
2800
2800
2800
2800
2800
2800
2800
2800
2800
2800
2800
2800
2800
2800
2800
2800
2800
2800
2800
2800
2800
2800
2800
2800
2800
2800
2800
2800
2800
2800
2800
2800
2800
2800
2800
2800
2800
2800
2800
2800
2800
2800
2800
2800
2800
2800
2800
2800
2800
3200
3200
3200
3200
3200
3200
3200
3200
3200
3200
3200
3200
3200
3200
3200
3200
3200
3200
3200
3200
3200
3200
3200
3200
3200
3200
3200
3200
3200
3200
3200
3200
3200
3200
3200
3200
3200
3200
3200
3200
3200
3200
3200
3200
3200
3200
3600
3600
3600
3600
3600
3600
3600
3600
3600
3600
3600
3600
3600
3600
3600
3600
3600
3600
3600
3600
3600
3600
3600
3600
3600
3600
3600
3600
3600
3600
3600
3600
4000
4000
4000
4000
4000
4000
4000
4000
4000
4000
4000
4000
4000
4000
4000
4000
4000
4000
4000
4400
4400
4400
4400
4400
4400
4400
4400
4400
4400
4400
4400
4400
4400
4400
4400
4400
4400
4400
4400
4400
4400
4400
4400
4400
4400
4800
4800
4800
4800
4800
4800
4800
4800
4800
4800
4800
4800
4800
4800
4800
4800
4800
4800
5200
5200
5200
5200
5200
5200
5200
5200
5200
5200
5200
5600
5600
5600
5600
5600
5600
5600
5600
6000
6000
6000
6000
6000
6400
6400
6400
6400
6400
6400
6400
6400
6400
6800
6800
6800
6800
6800
6800
6800
7200
7200
7200
7200
7200
7200
7200
7600
7600
7600
8000
8000
8400
8400
8400
8400
8400
8800
9200
9200
9600
11600
12800
13200
14000
27600
400
400
400
400
400
400
400
400
400
400
400
400
400
400
400
400
400
400
400
400
400
[truncated: 40,727 more rows]

## Sheet: Figure 1D
STIM1 cluster density	Control	STIM1 smKO
Cell 1	12.1738	2.65482
Cell 2	13.1924	2.03875
Cell 3	13.8387	2.1907
Cell 4	9.85028	2.29967
Cell 5	16.3793	2.74991
Cell 6	30.2251	8.2223
Cell 7	28.0537	7.70616
Cell 8	26.5053	5.94373
Cell 9	28.6666	5.82989
Cell 10	24.5009	6.04442
Cell 11	24.3491	4.20545
Cell 12	26.5844	5.50586
Cell 13	12.0488	6.11544
Cell 14	30.8327	4.06482
Cell 15	22.7647	5.04798
Cell 16	18.5007	5.85207
Cell 17	25.4223	4.28916
Cell 18	21.5538	3.3488
Minimum	9.85	2.039
25% Percentile	13.68	2.726
Median	23.56	4.669
75% Percentile	26.95	5.969
Maximum	30.83	8.222
Mean	21.41	4.673
Std. Deviation	6.934	1.878
Std. Error of Mean	1.634	0.4426
Lower 95% CI	17.97	3.739
Upper 95% CI	24.86	5.606
Unpaired t test
P value	<0.0001
Significantly different (P < 0.05)?	Yes
One- or two-tailed P value?	Two-tailed
Mean of column A	21.41
Mean of column B	4.673
Difference between means (B - A) ± SEM	-16.74 ± 1.693
95% confidence interval	-20.18 to -13.30
