# Supplementary material for: STIM1-dependent peripheral coupling governs the contractility of vascular smooth muscle cells
Source: eLife. 2022 Feb 11;11:e70278. doi: 10.7554/eLife.70278 (PMC8947769; doi:10.7554/eLife.70278)
Supplement: Figure 2—source data 1. [file elife-70278-fig2-data1.xlsx]

## Sheet: Figure 2B
PM volume (μm3)	Control	STIM1 smKO
Cell 1	546.19	744.85
Cell 2	637.36	496.92
Cell 3	336.95	576.21
Cell 4	427.35	553.06
Cell 5	474.62	645.9
Cell 6	456.96	544.35
Cell 7	390.61	366.46
Cell 8	650.61	512.07
Cell 9	725.61	455.01
Cell 10	442.36	382.63
Cell 11	698.52	599.08
Cell 12	619.56	488.92
Cell 13	398.08	439.06
Cell 14	713.89	339.72
Cell 15	606.19	400.2
Cell 16	552.01	450.65
Cell 17	599.75	424.64
Cell 18	495.72	426.51
Cell 19	554.96	515.17
Cell 20		514.22
Cell 21		401.75
Cell 22		336.99
Cell 23		619.38
Cell 24		488.24
Cell 25		488.67
Minimum	337	337
25% Percentile	442.4	413.2
Median	552	488.7
75% Percentile	637.4	548.7
Maximum	725.6	744.9
Mean	543.5	488.4
Std. Deviation	116.7	99.22
Std. Error of Mean	26.77	19.84
Lower 95% CI	487.3	447.5
Upper 95% CI	599.8	529.4
Unpaired t test
P value	0.0981
Significantly different (P < 0.05)?	No
One- or two-tailed P value?	Two-tailed
Mean of column A	543.5
Mean of column B	488.4
Difference between means (B - A) ± SEM	-55.12 ± 32.58
95% confidence interval	-120.9 to 10.63

## Sheet: Figure 2C
SR volume (μm3)	Control	STIM1 smKO
Cell 1	301.13	316.49
Cell 2	280.42	280.05
Cell 3	231.68	218.94
Cell 4	214.96	256.92
Cell 5	327.48	271.9
Cell 6	214.53	272.9
Cell 7	376.26	258.44
Cell 8	399.74	251.58
Cell 9	439.44	311.14
Cell 10	343.58	191.05
Cell 11	443.71	204.2
Cell 12	338.95	221.31
Cell 13	214.96	236.59
Cell 14	264.57	270.9
Cell 15	330.91	345.88
Cell 16	326.85	198.12
Cell 17	366.7	136.65
Cell 18	235.85	157.88
Cell 19	355.2	194.62
Cell 20		179.29
Cell 21		139.19
Cell 22		154.83
Cell 23		315.48
Cell 24		153.99
Cell 25		222.66
Minimum	214.5	136.7
25% Percentile	235.9	185.2
Median	327.5	222.7
75% Percentile	366.7	272.4
Maximum	443.7	345.9
Mean	316.2	230.4
Std. Deviation	73.2	59.68
Std. Error of Mean	16.79	11.94
Lower 95% CI	280.9	205.8
Upper 95% CI	351.4	255.1
Unpaired t test
P value	0.0001
Significantly different (P < 0.05)?	Yes
One- or two-tailed P value?	Two-tailed
Mean of column A	316.2
Mean of column B	230.4
Difference between means (B - A) ± SEM	-85.71 ± 20.03
95% confidence interval	-126.1 to -45.29

## Sheet: Figure 2D
PM-SR colocalization (%)	Control	STIM1 smKO
Cell 1	4.7691	2.46801
Cell 2	3.61323	5.48933
Cell 3	5.14268	3.89226
Cell 4	2.2049	2.10301
Cell 5	9.11464	1.96306
Cell 6	5.82748	4.4341
Cell 7	7.93457	3.02555
Cell 8	6.36036	1.5554
Cell 9	6.94976	3.27483
Cell 10	9.93206	3.86775
Cell 11	6.34382	4.59725
Cell 12	4.77379	4.93703
Cell 13	2.05159	4.08399
Cell 14	2.54583	2.34412
Cell 15	3.22259	3.8189
Cell 16	5.79982	1.34316
Cell 17	4.07411	0.781844
Cell 18	2.83303	0.616798
Cell 19	3.10556	4.92191
Cell 20		4.01298
Cell 21		2.64764
Cell 22		2.41309
Cell 23		5.91878
Cell 24		0.696289
Cell 25		2.97519
Minimum	2.052	0.6168
25% Percentile	3.106	2.033
Median	4.774	3.026
75% Percentile	6.36	4.259
Maximum	9.932	5.919
Mean	5.084	3.127
Std. Deviation	2.302	1.509
Std. Error of Mean	0.5281	0.3018
Lower 95% CI	3.975	2.504
Upper 95% CI	6.194	3.75
Unpaired t test
P value	0.0015
Significantly different (P < 0.05)?	Yes
One- or two-tailed P value?	Two-tailed
Mean of column A	5.084
Mean of column B	3.127
Difference between means (B - A) ± SEM	-1.957 ± 0.5753
95% confidence interval	-3.118 to -0.7959

## Sheet: Figure 2G
Volumes of all coupling sites (μm3)	Control	STIM1 smKO		Number of values	1551	1323
	0.01	0.01
	0.01	0.01		Minimum	0.01	0.01
	0.01	0.01		Maximum	19.48	11.23
	0.01	0.01		Range	19.47	11.22
	0.01	0.01
	0.01	0.01		Mean	0.5424	0.4368
	0.01	0.01		Std. Deviation	1.281	0.8623
	0.01	0.01		Std. Error of Mean	0.03254	0.02371
	0.01	0.01
	0.01	0.01
	0.01	0.01
	0.01	0.01
	0.01	0.01
	0.01	0.01
	0.01	0.01
	0.01	0.01
	0.01	0.01
	0.01	0.01
	0.01	0.01
	0.01	0.01
	0.01	0.01
	0.01	0.01
	0.01	0.01
	0.01	0.01
	0.01	0.01
	0.01	0.01
	0.01	0.01
	0.01	0.01
	0.01	0.01
	0.01	0.01
	0.01	0.01
	0.01	0.01
	0.01	0.01
	0.01	0.01
	0.01	0.01
	0.01	0.01
	0.01	0.01
	0.01	0.01
	0.01	0.01
	0.01	0.01
	0.01	0.01
	0.01	0.01
	0.01	0.01
	0.01	0.01
	0.01	0.01
	0.01	0.01
	0.01	0.01
	0.01	0.01
	0.01	0.01
	0.01	0.01
	0.01	0.01
	0.01	0.01
	0.01	0.01
	0.01	0.01
	0.01	0.01
	0.01	0.01
	0.01	0.01
	0.01	0.01
	0.01	0.01
	0.01	0.01
	0.01	0.01
	0.01	0.01
	0.01	0.01
	0.01	0.01
	0.01	0.01
	0.01	0.01
	0.01	0.01
	0.01	0.01
	0.01	0.01
	0.01	0.01
	0.01	0.01
	0.01	0.01
	0.01	0.01
	0.01	0.01
	0.01	0.01
	0.01	0.01
	0.01	0.01
	0.01	0.01
	0.01	0.01
	0.01	0.01
	0.01	0.01
	0.01	0.01
	0.01	0.01
	0.01	0.01
	0.01	0.01
	0.01	0.01
	0.01	0.01
	0.01	0.01
	0.01	0.01
	0.01	0.01
	0.01	0.01
	0.01	0.01
	0.01	0.01
	0.01	0.01
	0.01	0.01
	0.01	0.01
	0.01	0.01
	0.01	0.01
	0.01	0.01
	0.01	0.01
	0.01	0.01
	0.01	0.01
	0.01	0.01
	0.01	0.01
	0.01	0.01
	0.01	0.01
	0.01	0.01
	0.01	0.01
	0.01	0.01
	0.01	0.01
	0.01	0.01
	0.01	0.02
	0.01	0.02
	0.01	0.02
	0.01	0.02
	0.01	0.02
	0.01	0.02
	0.01	0.02
	0.01	0.02
	0.01	0.02
	0.01	0.02
	0.01	0.02
	0.01	0.02
	0.01	0.02
	0.01	0.02
	0.01	0.02
	0.01	0.02
	0.01	0.02
	0.01	0.02
	0.01	0.02
	0.02	0.02
	0.02	0.02
	0.02	0.02
	0.02	0.02
	0.02	0.02
	0.02	0.02
	0.02	0.02
	0.02	0.02
	0.02	0.02
	0.02	0.02
	0.02	0.02
	0.02	0.02
	0.02	0.02
	0.02	0.02
	0.02	0.02
	0.02	0.02
	0.02	0.02
	0.02	0.02
	0.02	0.02
	0.02	0.02
	0.02	0.02
	0.02	0.02
	0.02	0.02
	0.02	0.02
	0.02	0.02
	0.02	0.02
	0.02	0.02
	0.02	0.02
	0.02	0.02
	0.02	0.02
	0.02	0.02
	0.02	0.02
	0.02	0.02
	0.02	0.02
	0.02	0.02
	0.02	0.02
	0.02	0.02
	0.02	0.02
	0.02	0.02
	0.02	0.02
	0.02	0.02
	0.02	0.02
	0.02	0.02
	0.02	0.02
	0.02	0.02
	0.02	0.02
	0.02	0.02
	0.02	0.02
	0.02	0.02
	0.02	0.02
	0.02	0.02
	0.02	0.02
	0.02	0.02
	0.02	0.02
	0.02	0.02
	0.02	0.02
	0.02	0.02
	0.02	0.02
	0.02	0.02
	0.02	0.02
	0.02	0.02
	0.02	0.02
	0.02	0.02
	0.02	0.02
	0.02	0.02
	0.02	0.02
	0.02	0.02
	0.02	0.02
	0.02	0.03
	0.02	0.03
	0.02	0.03
	0.02	0.03
	0.02	0.03
	0.02	0.03
	0.02	0.03
	0.02	0.03
	0.02	0.03
	0.02	0.03
	0.02	0.03
	0.02	0.03
	0.02	0.03
	0.02	0.03
	0.02	0.03
	0.03	0.03
	0.03	0.03
	0.03	0.03
	0.03	0.03
	0.03	0.03
	0.03	0.03
	0.03	0.03
	0.03	0.03
	0.03	0.03
	0.03	0.03
	0.03	0.03
	0.03	0.03
	0.03	0.03
	0.03	0.03
	0.03	0.03
	0.03	0.03
	0.03	0.03
	0.03	0.03
	0.03	0.03
	0.03	0.03
	0.03	0.03
	0.03	0.03
	0.03	0.03
	0.03	0.03
	0.03	0.03
	0.03	0.03
	0.03	0.03
	0.03	0.03
	0.03	0.03
	0.03	0.03
	0.03	0.03
	0.03	0.03
	0.03	0.03
	0.03	0.03
	0.03	0.03
	0.03	0.03
	0.03	0.03
	0.03	0.03
	0.03	0.03
	0.03	0.03
	0.03	0.03
	0.03	0.03
	0.03	0.03
	0.03	0.03
	0.03	0.03
	0.03	0.03
	0.03	0.03
	0.03	0.03
	0.03	0.03
	0.03	0.03
	0.03	0.03
	0.03	0.03
	0.03	0.03
	0.03	0.03
	0.03	0.03
	0.03	0.04
	0.03	0.04
	0.03	0.04
	0.03	0.04
	0.03	0.04
	0.03	0.04
	0.03	0.04
	0.03	0.04
	0.03	0.04
	0.03	0.04
	0.03	0.04
	0.03	0.04
	0.03	0.04
	0.03	0.04
	0.03	0.04
	0.03	0.04
	0.03	0.04
	0.03	0.04
	0.03	0.04
	0.04	0.04
	0.04	0.04
	0.04	0.04
	0.04	0.04
	0.04	0.04
	0.04	0.04
	0.04	0.04
	0.04	0.04
	0.04	0.04
	0.04	0.04
	0.04	0.04
	0.04	0.04
	0.04	0.04
	0.04	0.04
	0.04	0.04
	0.04	0.04
	0.04	0.04
	0.04	0.04
	0.04	0.04
	0.04	0.04
	0.04	0.04
	0.04	0.04
	0.04	0.04
	0.04	0.04
	0.04	0.04
	0.04	0.04
	0.04	0.04
	0.04	0.04
	0.04	0.04
	0.04	0.04
	0.04	0.04
	0.04	0.04
	0.04	0.04
	0.04	0.04
	0.04	0.04
	0.04	0.04
	0.04	0.04
	0.04	0.04
	0.04	0.04
	0.04	0.04
	0.04	0.04
	0.04	0.04
	0.04	0.04
	0.04	0.05
	0.04	0.05
	0.04	0.05
	0.04	0.05
	0.04	0.05
	0.04	0.05
	0.04	0.05
	0.04	0.05
	0.04	0.05
	0.04	0.05
	0.04	0.05
	0.04	0.05
	0.04	0.05
	0.04	0.05
	0.04	0.05
	0.04	0.05
	0.05	0.05
	0.05	0.05
	0.05	0.05
	0.05	0.05
	0.05	0.05
	0.05	0.05
	0.05	0.05
	0.05	0.05
	0.05	0.05
	0.05	0.05
	0.05	0.05
	0.05	0.05
	0.05	0.05
	0.05	0.05
	0.05	0.05
	0.05	0.05
	0.05	0.05
	0.05	0.05
	0.05	0.05
	0.05	0.05
	0.05	0.05
	0.05	0.05
	0.05	0.05
	0.05	0.05
	0.05	0.05
	0.05	0.05
	0.05	0.05
	0.05	0.05
	0.05	0.06
	0.05	0.06
	0.05	0.06
	0.05	0.06
	0.05	0.06
	0.05	0.06
	0.05	0.06
	0.05	0.06
	0.05	0.06
	0.05	0.06
	0.05	0.06
	0.05	0.06
	0.05	0.06
	0.05	0.06
	0.05	0.06
	0.05	0.06
	0.05	0.06
	0.05	0.06
	0.05	0.06
	0.05	0.06
	0.05	0.06
	0.05	0.06
	0.05	0.06
	0.05	0.06
	0.05	0.06
	0.05	0.06
	0.05	0.06
	0.05	0.06
	0.05	0.06
	0.06	0.06
	0.06	0.06
	0.06	0.06
	0.06	0.06
	0.06	0.06
	0.06	0.06
	0.06	0.06
	0.06	0.06
	0.06	0.06
	0.06	0.06
	0.06	0.06
	0.06	0.06
	0.06	0.06
	0.06	0.07
	0.06	0.07
	0.06	0.07
	0.06	0.07
	0.06	0.07
	0.06	0.07
	0.06	0.07
	0.06	0.07
	0.06	0.07
	0.06	0.07
	0.06	0.07
	0.06	0.07
	0.06	0.07
	0.06	0.07
	0.06	0.07
	0.06	0.07
	0.06	0.07
	0.06	0.07
	0.06	0.07
	0.06	0.07
	0.06	0.07
	0.06	0.07
	0.06	0.07
	0.06	0.07
	0.06	0.07
	0.06	0.07
	0.06	0.07
	0.06	0.07
	0.06	0.07
	0.06	0.07
	0.06	0.07
	0.06	0.07
	0.06	0.07
	0.06	0.07
	0.06	0.07
	0.07	0.07
	0.07	0.07
	0.07	0.07
	0.07	0.07
	0.07	0.08
	0.07	0.08
	0.07	0.08
	0.07	0.08
	0.07	0.08
	0.07	0.08
	0.07	0.08
	0.07	0.08
	0.07	0.08
	0.07	0.08
	0.07	0.08
	0.07	0.08
	0.07	0.08
	0.07	0.08
	0.07	0.08
	0.07	0.08
	0.07	0.08
	0.07	0.08
	0.07	0.08
	0.07	0.08
	0.07	0.08
	0.07	0.08
	0.07	0.08
	0.07	0.08
	0.07	0.08
	0.07	0.08
	0.07	0.08
	0.07	0.08
	0.07	0.08
	0.07	0.09
	0.07	0.09
	0.07	0.09
	0.07	0.09
	0.07	0.09
	0.07	0.09
	0.07	0.09
	0.07	0.09
	0.07	0.09
	0.07	0.09
	0.07	0.09
	0.07	0.09
	0.07	0.09
	0.07	0.09
	0.07	0.09
	0.07	0.09
	0.08	0.09
	0.08	0.09
	0.08	0.09
	0.08	0.09
	0.08	0.09
	0.08	0.09
	0.08	0.09
	0.08	0.09
	0.08	0.09
	0.08	0.09
	0.08	0.09
	0.08	0.09
	0.08	0.09
	0.08	0.09
	0.08	0.09
	0.08	0.09
	0.08	0.09
	0.08	0.1
	0.08	0.1
	0.08	0.1
	0.08	0.1
	0.08	0.1
	0.08	0.1
	0.08	0.1
	0.08	0.1
	0.08	0.1
	0.08	0.1
	0.08	0.1
	0.08	0.1
	0.08	0.1
	0.08	0.1
	0.08	0.1
	0.08	0.1
	0.08	0.1
	0.08	0.1
	0.08	0.1
	0.08	0.1
	0.09	0.1
	0.09	0.1
	0.09	0.1
	0.09	0.1
	0.09	0.1
	0.09	0.1
	0.09	0.1
	0.09	0.1
	0.09	0.11
	0.09	0.11
	0.09	0.11
	0.09	0.11
	0.09	0.11
	0.09	0.11
	0.09	0.11
	0.09	0.11
	0.09	0.11
	0.09	0.11
	0.09	0.11
	0.09	0.11
	0.09	0.11
	0.09	0.11
	0.09	0.11
	0.09	0.11
	0.09	0.11
	0.09	0.11
	0.09	0.11
	0.09	0.11
	0.09	0.11
	0.1	0.11
	0.1	0.11
	0.1	0.11
	0.1	0.12
	0.1	0.12
	0.1	0.12
	0.1	0.12
	0.1	0.12
	0.1	0.12
	0.1	0.12
	0.1	0.12
	0.1	0.12
	0.1	0.12
	0.1	0.12
	0.1	0.12
	0.1	0.12
	0.1	0.12
	0.1	0.12
	0.1	0.12
	0.1	0.12
	0.1	0.12
	0.1	0.12
	0.1	0.12
	0.1	0.12
	0.1	0.12
	0.1	0.12
	0.1	0.12
	0.1	0.12
	0.1	0.12
	0.1	0.12
	0.1	0.12
	0.1	0.12
	0.1	0.13
	0.1	0.13
	0.11	0.13
	0.11	0.13
	0.11	0.13
	0.11	0.13
	0.11	0.13
	0.11	0.13
	0.11	0.13
	0.11	0.13
	0.11	0.13
	0.11	0.13
	0.11	0.13
	0.11	0.13
	0.11	0.13
	0.11	0.13
	0.11	0.13
	0.11	0.14
	0.11	0.14
	0.11	0.14
	0.11	0.14
	0.11	0.14
	0.11	0.14
	0.11	0.14
	0.11	0.14
	0.11	0.14
	0.11	0.14
	0.11	0.14
	0.11	0.14
	0.11	0.14
	0.11	0.14
	0.11	0.14
	0.11	0.14
	0.11	0.14
	0.11	0.14
	0.12	0.14
	0.12	0.14
	0.12	0.14
	0.12	0.15
	0.12	0.15
	0.12	0.15
	0.12	0.15
	0.12	0.15
	0.12	0.15
	0.12	0.15
	0.12	0.15
	0.12	0.15
	0.12	0.15
	0.12	0.15
	0.12	0.15
	0.12	0.15
	0.12	0.15
	0.12	0.15
	0.12	0.15
	0.12	0.15
	0.12	0.15
	0.12	0.15
	0.12	0.15
	0.12	0.15
	0.12	0.15
	0.13	0.15
	0.13	0.15
	0.13	0.15
	0.13	0.16
	0.13	0.16
	0.13	0.16
	0.13	0.16
	0.13	0.16
	0.13	0.16
	0.13	0.16
	0.13	0.16
	0.13	0.16
	0.13	0.16
	0.13	0.16
	0.13	0.16
	0.13	0.16
	0.13	0.16
	0.13	0.16
	0.13	0.16
	0.13	0.16
	0.13	0.16
	0.13	0.16
	0.13	0.16
	0.13	0.16
	0.13	0.17
	0.13	0.17
	0.14	0.17
	0.14	0.17
	0.14	0.17
	0.14	0.17
	0.14	0.17
	0.14	0.17
	0.14	0.17
	0.14	0.17
	0.14	0.17
	0.14	0.17
	0.14	0.17
	0.14	0.17
	0.14	0.17
	0.14	0.17
	0.14	0.17
	0.14	0.17
	0.14	0.17
	0.14	0.17
	0.14	0.17
	0.14	0.17
	0.14	0.17
	0.14	0.17
	0.14	0.18
	0.14	0.18
	0.14	0.18
	0.14	0.18
	0.14	0.18
	0.14	0.18
	0.14	0.18
	0.14	0.18
	0.14	0.18
	0.14	0.18
	0.14	0.18
	0.14	0.18
	0.14	0.18
	0.14	0.18
	0.14	0.18
	0.14	0.19
	0.14	0.19
	0.15	0.19
	0.15	0.19
	0.15	0.19
	0.15	0.19
	0.15	0.19
	0.15	0.19
	0.15	0.19
	0.15	0.19
	0.15	0.19
	0.15	0.19
	0.15	0.19
	0.15	0.2
	0.15	0.2
	0.15	0.2
	0.15	0.2
	0.15	0.2
	0.15	0.2
	0.15	0.2
	0.15	0.2
	0.15	0.2
	0.15	0.2
	0.15	0.2
	0.15	0.2
	0.16	0.2
	0.16	0.2
	0.16	0.2
	0.16	0.2
	0.16	0.2
	0.16	0.21
	0.16	0.21
	0.16	0.21
	0.16	0.21
	0.16	0.21
	0.16	0.21
	0.16	0.21
	0.16	0.21
	0.16	0.21
	0.16	0.21
	0.16	0.21
	0.16	0.21
	0.16	0.21
	0.16	0.21
	0.16	0.21
	0.16	0.22
	0.16	0.22
	0.16	0.22
	0.16	0.22
	0.16	0.22
	0.16	0.22
	0.16	0.22
	0.16	0.22
	0.16	0.22
	0.16	0.23
	0.16	0.23
	0.16	0.23
	0.16	0.23
	0.16	0.23
	0.16	0.23
	0.17	0.23
	0.17	0.23
	0.17	0.23
	0.17	0.23
	0.17	0.23
	0.17	0.23
	0.17	0.23
	0.17	0.24
	0.17	0.24
	0.17	0.24
	0.17	0.24
	0.17	0.24
	0.17	0.24
	0.17	0.24
	0.17	0.24
	0.17	0.24
	0.17	0.24
	0.17	0.24
	0.17	0.24
	0.17	0.24
	0.17	0.24
	0.17	0.25
	0.18	0.25
	0.18	0.25
	0.18	0.25
	0.18	0.25
	0.18	0.25
	0.18	0.25
	0.18	0.25
	0.18	0.25
	0.18	0.25
	0.18	0.25
	0.18	0.25
	0.18	0.26
	0.18	0.26
	0.18	0.26
	0.19	0.26
	0.19	0.26
	0.19	0.26
	0.19	0.26
	0.19	0.26
	0.19	0.26
	0.19	0.26
	0.19	0.26
	0.19	0.26
	0.19	0.27
	0.19	0.27
	0.19	0.27
	0.19	0.27
	0.19	0.27
	0.19	0.27
	0.19	0.27
	0.19	0.27
	0.2	0.27
	0.2	0.27
	0.2	0.27
	0.2	0.27
	0.2	0.27
	0.2	0.27
	0.2	0.28
	0.2	0.28
	0.2	0.28
	0.2	0.28
	0.2	0.28
	0.2	0.28
	0.2	0.28
	0.2	0.28
	0.2	0.28
	0.2	0.28
	0.2	0.29
	0.2	0.29
	0.2	0.29
	0.2	0.29
	0.2	0.29
	0.2	0.29
	0.21	0.29
	0.21	0.29
	0.21	0.29
	0.21	0.29
	0.21	0.29
	0.21	0.29
	0.21	0.29
	0.21	0.29
	0.21	0.29
	0.21	0.29
	0.21	0.3
	0.21	0.3
	0.21	0.3
	0.21	0.3
	0.21	0.3
	0.21	0.3
	0.21	0.3
	0.22	0.3
	0.22	0.3
	0.22	0.3
	0.22	0.3
	0.22	0.3
	0.22	0.31
	0.22	0.31
	0.22	0.31
	0.22	0.31
	0.22	0.31
	0.22	0.31
	0.22	0.31
	0.22	0.31
	0.22	0.31
	0.22	0.31
	0.23	0.32
	0.23	0.32
	0.23	0.32
	0.23	0.32
	0.23	0.32
	0.23	0.32
	0.23	0.32
	0.23	0.32
	0.23	0.32
	0.23	0.32
	0.23	0.32
	0.23	0.32
	0.23	0.32
	0.23	0.32
	0.23	0.32
	0.23	0.32
	0.23	0.33
	0.23	0.33
	0.23	0.33
	0.23	0.33
	0.23	0.33
	0.24	0.33
	0.24	0.33
	0.24	0.33
	0.24	0.33
	0.24	0.33
	0.24	0.33
	0.24	0.33
	0.24	0.34
	0.24	0.34
	0.24	0.34
	0.24	0.34
	0.24	0.34
	0.24	0.34
	0.25	0.34
	0.25	0.34
	0.25	0.34
	0.25	0.34
	0.25	0.34
	0.25	0.35
	0.25	0.35
	0.25	0.35
	0.25	0.35
	0.25	0.35
	0.26	0.35
	0.26	0.35
	0.26	0.35
	0.26	0.35
	0.26	0.35
	0.26	0.35
	0.26	0.36
	0.26	0.36
	0.26	0.36
	0.26	0.36
	0.26	0.36
	0.27	0.36
	0.27	0.36
	0.27	0.36
	0.27	0.36
	0.27	0.36
	0.27	0.36
	0.27	0.37
	0.27	0.37
	0.27	0.37
	0.27	0.37
	0.27	0.37
	0.28	0.37
	0.28	0.37
	0.28	0.37
	0.28	0.37
	0.28	0.38
	0.28	0.38
	0.28	0.38
	0.28	0.38
	0.28	0.39
	0.28	0.39
	0.29	0.39
	0.29	0.39
	0.29	0.39
	0.29	0.39
	0.29	0.39
	0.29	0.39
	0.29	0.39
	0.29	0.39
	0.29	0.39
	0.29	0.39
	0.29	0.39
	0.29	0.4
	0.29	0.4
	0.3	0.4
	0.3	0.4
	0.3	0.4
	0.3	0.41
	0.3	0.41
	0.3	0.41
	0.3	0.41
	0.3	0.41
	0.3	0.42
	0.3	0.42
	0.3	0.42
	0.3	0.42
	0.3	0.43
	0.3	0.43
	0.3	0.43
	0.3	0.43
	0.3	0.43
	0.3	0.44
	0.31	0.44
	0.31	0.44
	0.31	0.44
	0.31	0.44
	0.31	0.45
	0.31	0.45
	0.31	0.45
	0.31	0.45
	0.31	0.46
	0.31	0.46
	0.31	0.46
	0.31	0.46
	0.31	0.46
	0.31	0.46
	0.31	0.46
	0.32	0.46
	0.32	0.46
	0.32	0.46
	0.32	0.47
	0.32	0.47
	0.32	0.47
	0.32	0.48
	0.33	0.48
	0.33	0.48
	0.33	0.48
	0.33	0.49
	0.33	0.49
	0.33	0.49
	0.33	0.49
	0.33	0.49
	0.33	0.49
	0.34	0.49
	0.34	0.49
	0.34	0.5
	0.34	0.5
	0.34	0.5
	0.34	0.51
	0.34	0.51
	0.34	0.51
	0.34	0.51
	0.34	0.52
	0.35	0.52
	0.35	0.52
	0.35	0.53
	0.35	0.53
	0.35	0.53
	0.35	0.53
	0.35	0.54
	0.35	0.54
	0.35	0.54
	0.35	0.55
	0.36	0.55
	0.36	0.56
	0.36	0.56
	0.36	0.56
	0.36	0.56
	0.36	0.57
	0.36	0.57
	0.36	0.57
	0.37	0.57
	0.37	0.57
	0.37	0.57
	0.37	0.58
	0.37	0.58
	0.37	0.58
	0.37	0.58
	0.37	0.59
	0.37	0.59
	0.37	0.59
	0.38	0.59
	0.38	0.59
	0.38	0.59
	0.38	0.59
	0.38	0.59
	0.38	0.6
	0.38	0.6
	0.38	0.6
	0.38	0.6
	0.38	0.61
	0.38	0.61
	0.39	0.61
	0.39	0.61
	0.39	0.61
	0.39	0.62
	0.39	0.62
	0.39	0.62
	0.39	0.62
	0.4	0.62
	0.4	0.62
	0.4	0.62
	0.4	0.63
	0.4	0.63
	0.4	0.63
	0.4	0.63
	0.4	0.64
	0.4	0.64
	0.4	0.64
	0.41	0.64
	0.41	0.65
	0.41	0.65
	0.41	0.65
	0.41	0.65
	0.41	0.66
	0.41	0.66
	0.42	0.66
	0.42	0.67
	0.42	0.67
	0.42	0.67
	0.42	0.67
	0.42	0.68
	0.42	0.68
	0.42	0.68
	0.42	0.68
	0.42	0.68
	0.43	0.68
	0.43	0.69
	0.43	0.69
	0.43	0.69
	0.43	0.69
	0.43	0.7
	0.43	0.7
	0.44	0.71
	0.44	0.71
	0.44	0.72
	0.44	0.73
	0.44	0.73
	0.44	0.73
	0.45	0.74
	0.45	0.74
	0.45	0.74
	0.45	0.74
	0.45	0.75
	0.45	0.75
	0.45	0.75
	0.46	0.75
	0.46	0.76
	0.46	0.76
	0.46	0.77
	0.46	0.78
	0.46	0.78
	0.47	0.78
	0.47	0.78
	0.47	0.78
	0.47	0.78
	0.47	0.78
	0.47	0.79
	0.48	0.8
	0.48	0.8
	0.48	0.8
	0.48	0.81
	0.48	0.82
	0.48	0.82
	0.48	0.83
	0.48	0.84
	0.48	0.84
	0.49	0.85
	0.49	0.85
	0.49	0.86
	0.49	0.86
	0.49	0.86
	0.49	0.87
	0.49	0.87
	0.49	0.88
	0.5	0.88
	0.5	0.88
	0.5	0.88
	0.5	0.89
	0.51	0.89
	0.51	0.89
	0.51	0.89
	0.52	0.89
	0.52	0.9
	0.52	0.9
	0.52	0.9
	0.52	0.91
	0.53	0.91
	0.53	0.91
	0.53	0.92
	0.53	0.95
	0.53	0.95
	0.53	0.97
	0.53	0.98
	0.54	0.99
	0.54	0.99
	0.54	1
	0.54	1
	0.54	1.01
	0.54	1.01
	0.55	1.02
	0.55	1.02
	0.55	1.04
	0.55	1.05
	0.55	1.05
	0.55	1.05
	0.55	1.06
	0.55	1.06
	0.55	1.06
	0.55	1.07
	0.56	1.07
	0.56	1.08
	0.56	1.11
	0.56	1.14
	0.56	1.14
	0.56	1.14
	0.57	1.14
	0.57	1.15
	0.57	1.16
	0.58	1.16
	0.58	1.16
	0.58	1.17
	0.58	1.17
	0.58	1.17
	0.59	1.18
	0.59	1.19
	0.59	1.19
	0.59	1.22
	0.59	1.23
	0.59	1.24
	0.59	1.26
	0.59	1.26
	0.6	1.28
	0.6	1.29
	0.6	1.31
	0.61	1.31
	0.61	1.33
	0.61	1.33
	0.61	1.33
	0.61	1.35
	0.61	1.35
	0.61	1.36
	0.61	1.38
	0.62	1.38
	0.62	1.38
	0.62	1.41
	0.62	1.41
	0.62	1.42
	0.62	1.43
	0.63	1.43
	0.63	1.44
	0.63	1.45
	0.63	1.45
	0.63	1.48
	0.64	1.5
	0.64	1.5
	0.64	1.51
	0.64	1.52
	0.64	1.52
	0.64	1.53
	0.64	1.54
	0.65	1.54
	0.65	1.54
	0.66	1.56
	0.66	1.61
	0.67	1.63
	0.67	1.64
	0.67	1.67
	0.67	1.68
	0.68	1.69
	0.68	1.72
	0.68	1.73
	0.69	1.75
	0.69	1.76
	0.69	1.77
	0.7	1.78
	0.7	1.78
	0.71	1.78
	0.71	1.84
	0.72	1.85
	0.72	1.87
	0.72	1.89
	0.72	1.89
	0.74	1.94
	0.74	1.96
	0.74	1.99
	0.74	2
	0.74	2
	0.74	2.11
	0.74	2.13
	0.74	2.15
	0.75	2.2
	0.75	2.22
	0.75	2.23
	0.75	2.25
	0.76	2.28
	0.76	2.35
	0.76	2.43
	0.77	2.48
	0.77	2.5
	0.77	2.52
	0.77	2.63
	0.77	2.64
	0.77	2.65
	0.77	2.79
	0.77	2.91
	0.78	2.96
	0.78	2.97
	0.78	3.02
	0.78	3.04
	0.79	3.06
	0.8	3.07
	0.8	3.1
	0.81	3.19
	0.81	3.29
	0.81	3.39
	0.81	3.4
	0.82	3.47
	0.82	3.58
	0.82	3.64
	0.83	3.66
	0.83	3.69
	0.83	3.83
	0.84	4.07
	0.84	4.1
	0.85	4.1
	0.85	4.31
	0.85	4.47
	0.85	4.6
	0.85	4.81
	0.86	4.98
	0.86	5.86
	0.86	6.13
	0.87	6.61
	0.87	6.66
	0.87	6.73
	0.87	6.74
	0.88	6.79
	0.88	7.68
	0.89	11.23
	0.89
	0.91
	0.91
	0.92
	0.93
	0.93
	0.95
	0.95
	0.95
	0.95
	0.96
	0.96
	0.97
	0.97
	0.97
	0.98
	0.98
	0.98
	0.99
	0.99
	0.99
	0.99
	0.99
	0.99
	1
	1
	1
	1.01
	1.01
	1.01
	1.02
	1.02
	1.04
	1.04
	1.04
	1.04
	1.05
	1.06
	1.06
	1.07
	1.07
	1.08
	1.08
	1.08
	1.09
	1.09
	1.1
	1.1
	1.11
	1.11
	1.12
	1.13
	1.13
	1.14
	1.14
	1.14
	1.14
	1.15
	1.15
	1.16
	1.17
	1.18
	1.19
	1.2
	1.21
	1.21
	1.21
	1.21
	1.21
	1.23
	1.23
	1.25
	1.25
	1.26
	1.26
	1.28
	1.29
	1.29
	1.3
	1.31
	1.31
	1.32
	1.33
	1.33
	1.33
	1.33
	1.34
	1.34
	1.34
	1.34
	1.36
	1.36
	1.36
	1.36
	1.36
	1.4
	1.4
	1.4
	1.42
	1.43
	1.44
	1.45
	1.46
	1.47
	1.49
	1.49
	1.5
	1.51
	1.51
	1.53
	1.53
	1.55
	1.56
	1.59
	1.6
	1.62
	1.64
	1.66
	1.68
	1.68
	1.75
	1.75
	1.75
	1.75
	1.76
	1.77
	1.81
	1.81
	1.82
	1.83
	1.83
	1.85
	1.88
	1.92
	1.94
	1.95
	1.98
	2.02
	2.05
	2.09
	2.1
	2.1
	2.11
	2.14
	2.14
	2.16
	2.16
	2.16
	2.19
	2.22
	2.23
	2.25
	2.26
	2.26
	2.27
	2.28
	2.29
	2.31
	2.35
	2.35
	2.39
	2.41
	2.42
	2.49
	2.5
	2.51
	2.51
	2.52
	2.52
	2.53
	2.6
	2.61
	2.64
	2.67
	2.67
	2.68
	2.73
	2.79
	2.81
	2.87
	2.87
	2.89
	2.92
	3.07
	3.08
	3.15
	3.16
	3.21
	3.22
	3.26
	3.29
	3.48
	3.54
	3.71
	3.72
	3.77
	4
	4.11
	4.25
	4.29
	4.48
	4.53
	4.57
	4.59
	4.6
	4.62
	5.28
	5.37
	5.48
	5.56
	5.84
	5.95
	6.13
	6.47
	6.86
	6.9
	6.96
	7.23
	7.41
	7.84
	8.83
	10.12
	11.15
	11.58
	12.23
	12.67
	18.09
	19.48

## Sheet: Figure 2H
Coupling site density	Control	STIM1 smKO
Cell 1	0.177593	0.119487
Cell 2	0.141207	0.197216
Cell 3	0.151357	0.152723
Cell 4	0.09126	0.112104
Cell 5	0.288651	0.113021
Cell 6	0.242909	0.145128
Cell 7	0.199685	0.114611
Cell 8	0.204424	0.078114
Cell 9	0.220505	0.160436
Cell 10	0.250929	0.146355
Cell 11	0.146022	0.156906
Cell 12	0.114598	0.130902
Cell 13	0.1457	0.148044
Cell 14	0.106458	0.150123
Cell 15	0.097329	0.117442
Cell 16	0.224634	0.068789
Cell 17	0.130055	0.032969
Cell 18	0.114985	0.070339
Cell 19	0.1874	0.155287
Cell 20		0.105013
Cell 21		0.05476
Cell 22		0.106827
Cell 23		0.180827
Cell 24		0.030722
Cell 25		0.141198
Minimum	0.09126	0.03072
25% Percentile	0.115	0.09156
Median	0.1514	0.1195
75% Percentile	0.2205	0.1514
Maximum	0.2887	0.1972
Mean	0.1703	0.1196
Std. Deviation	0.05747	0.04366
Std. Error of Mean	0.01319	0.008732
Lower 95% CI	0.1426	0.1016
Upper 95% CI	0.198	0.1376
Unpaired t test
P value	0.0018
Significantly different (P < 0.05)?	Yes
One- or two-tailed P value?	Two-tailed
Mean of column A	0.1703
Mean of column B	0.1196
Difference between means (B - A) ± SEM	-0.05073 ± 0.01523
95% confidence interval	-0.08147 to -0.01999

## Sheet: Figure 2I
Mean Coupling Site Volume	Control	STIM1 smKO			Control	STIM1 smKO
	0.01	0.01		Minimum	0.01	0.01
	0.01	0.01		25% Percentile	0.05	0.05
	0.01	0.01		Median	0.16	0.16
	0.01	0.01		75% Percentile	0.51	0.43
	0.01	0.01		Maximum	19.48	11.23
	0.01	0.01
	0.01	0.01		Mean	0.5424	0.4368
	0.01	0.01		Std. Deviation	1.281	0.8623
	0.01	0.01		Std. Error of Mean	0.03254	0.02371
	0.01	0.01
	0.01	0.01		Lower 95% CI	0.4785	0.3903
	0.01	0.01		Upper 95% CI	0.6062	0.4833
	0.01	0.01
	0.01	0.01		Unpaired t test
	0.01	0.01		P value	0.011
	0.01	0.01		Significantly different (P < 0.05)?	Yes
	0.01	0.01		One- or two-tailed P value?	Two-tailed
	0.01	0.01
	0.01	0.01		Mean of column A	0.5424
	0.01	0.01		Mean of column B	0.4368
	0.01	0.01		Difference between means (B - A) ± SEM	-0.1056 ± 0.04148
	0.01	0.01		95% confidence interval	-0.1869 to -0.02424
	0.01	0.01
	0.01	0.01
	0.01	0.01
	0.01	0.01
	0.01	0.01
	0.01	0.01
	0.01	0.01
	0.01	0.01
	0.01	0.01
	0.01	0.01
	0.01	0.01
	0.01	0.01
	0.01	0.01
	0.01	0.01
	0.01	0.01
	0.01	0.01
	0.01	0.01
	0.01	0.01
	0.01	0.01
	0.01	0.01
	0.01	0.01
	0.01	0.01
	0.01	0.01
	0.01	0.01
	0.01	0.01
	0.01	0.01
	0.01	0.01
	0.01	0.01
	0.01	0.01
	0.01	0.01
	0.01	0.01
	0.01	0.01
	0.01	0.01
	0.01	0.01
	0.01	0.01
	0.01	0.01
	0.01	0.01
	0.01	0.01
	0.01	0.01
	0.01	0.01
	0.01	0.01
	0.01	0.01
	0.01	0.01
	0.01	0.01
	0.01	0.01
	0.01	0.01
	0.01	0.01
	0.01	0.01
	0.01	0.01
	0.01	0.01
	0.01	0.01
	0.01	0.01
	0.01	0.01
	0.01	0.01
	0.01	0.01
	0.01	0.01
	0.01	0.01
	0.01	0.01
	0.01	0.01
	0.01	0.01
	0.01	0.01
	0.01	0.01
	0.01	0.01
	0.01	0.01
	0.01	0.01
	0.01	0.01
	0.01	0.01
	0.01	0.01
	0.01	0.01
	0.01	0.01
	0.01	0.01
	0.01	0.01
	0.01	0.01
	0.01	0.01
	0.01	0.01
	0.01	0.01
	0.01	0.01
	0.01	0.01
	0.01	0.01
	0.01	0.01
	0.01	0.01
	0.01	0.01
	0.01	0.01
	0.01	0.01
	0.01	0.01
	0.01	0.01
	0.01	0.01
	0.01	0.01
	0.01	0.01
	0.01	0.02
	0.01	0.02
	0.01	0.02
	0.01	0.02
	0.01	0.02
	0.01	0.02
	0.01	0.02
	0.01	0.02
	0.01	0.02
	0.01	0.02
	0.01	0.02
	0.01	0.02
	0.01	0.02
	0.01	0.02
	0.01	0.02
	0.01	0.02
	0.01	0.02
	0.01	0.02
	0.01	0.02
	0.02	0.02
	0.02	0.02
	0.02	0.02
	0.02	0.02
	0.02	0.02
	0.02	0.02
	0.02	0.02
	0.02	0.02
	0.02	0.02
	0.02	0.02
	0.02	0.02
	0.02	0.02
	0.02	0.02
	0.02	0.02
	0.02	0.02
	0.02	0.02
	0.02	0.02
	0.02	0.02
	0.02	0.02
	0.02	0.02
	0.02	0.02
	0.02	0.02
	0.02	0.02
	0.02	0.02
	0.02	0.02
	0.02	0.02
	0.02	0.02
	0.02	0.02
	0.02	0.02
	0.02	0.02
	0.02	0.02
	0.02	0.02
	0.02	0.02
	0.02	0.02
	0.02	0.02
	0.02	0.02
	0.02	0.02
	0.02	0.02
	0.02	0.02
	0.02	0.02
	0.02	0.02
	0.02	0.02
	0.02	0.02
	0.02	0.02
	0.02	0.02
	0.02	0.02
	0.02	0.02
	0.02	0.02
	0.02	0.02
	0.02	0.02
	0.02	0.02
	0.02	0.02
	0.02	0.02
	0.02	0.02
	0.02	0.02
	0.02	0.02
	0.02	0.02
	0.02	0.02
	0.02	0.02
	0.02	0.02
	0.02	0.02
	0.02	0.02
	0.02	0.02
	0.02	0.02
	0.02	0.02
	0.02	0.02
	0.02	0.02
	0.02	0.02
	0.02	0.03
	0.02	0.03
	0.02	0.03
	0.02	0.03
	0.02	0.03
	0.02	0.03
	0.02	0.03
	0.02	0.03
	0.02	0.03
	0.02	0.03
	0.02	0.03
	0.02	0.03
	0.02	0.03
	0.02	0.03
	0.02	0.03
	0.03	0.03
	0.03	0.03
	0.03	0.03
	0.03	0.03
	0.03	0.03
	0.03	0.03
	0.03	0.03
	0.03	0.03
	0.03	0.03
	0.03	0.03
	0.03	0.03
	0.03	0.03
	0.03	0.03
	0.03	0.03
	0.03	0.03
	0.03	0.03
	0.03	0.03
	0.03	0.03
	0.03	0.03
	0.03	0.03
	0.03	0.03
	0.03	0.03
	0.03	0.03
	0.03	0.03
	0.03	0.03
	0.03	0.03
	0.03	0.03
	0.03	0.03
	0.03	0.03
	0.03	0.03
	0.03	0.03
	0.03	0.03
	0.03	0.03
	0.03	0.03
	0.03	0.03
	0.03	0.03
	0.03	0.03
	0.03	0.03
	0.03	0.03
	0.03	0.03
	0.03	0.03
	0.03	0.03
	0.03	0.03
	0.03	0.03
	0.03	0.03
	0.03	0.03
	0.03	0.03
	0.03	0.03
	0.03	0.03
	0.03	0.03
	0.03	0.03
	0.03	0.03
	0.03	0.03
	0.03	0.03
	0.03	0.03
	0.03	0.04
	0.03	0.04
	0.03	0.04
	0.03	0.04
	0.03	0.04
	0.03	0.04
	0.03	0.04
	0.03	0.04
	0.03	0.04
	0.03	0.04
	0.03	0.04
	0.03	0.04
	0.03	0.04
	0.03	0.04
	0.03	0.04
	0.03	0.04
	0.03	0.04
	0.03	0.04
	0.03	0.04
	0.04	0.04
	0.04	0.04
	0.04	0.04
	0.04	0.04
	0.04	0.04
	0.04	0.04
	0.04	0.04
	0.04	0.04
	0.04	0.04
	0.04	0.04
	0.04	0.04
	0.04	0.04
	0.04	0.04
	0.04	0.04
	0.04	0.04
	0.04	0.04
	0.04	0.04
	0.04	0.04
	0.04	0.04
	0.04	0.04
	0.04	0.04
	0.04	0.04
	0.04	0.04
	0.04	0.04
	0.04	0.04
	0.04	0.04
	0.04	0.04
	0.04	0.04
	0.04	0.04
	0.04	0.04
	0.04	0.04
	0.04	0.04
	0.04	0.04
	0.04	0.04
	0.04	0.04
	0.04	0.04
	0.04	0.04
	0.04	0.04
	0.04	0.04
	0.04	0.04
	0.04	0.04
	0.04	0.04
	0.04	0.04
	0.04	0.05
	0.04	0.05
	0.04	0.05
	0.04	0.05
	0.04	0.05
	0.04	0.05
	0.04	0.05
	0.04	0.05
	0.04	0.05
	0.04	0.05
	0.04	0.05
	0.04	0.05
	0.04	0.05
	0.04	0.05
	0.04	0.05
	0.04	0.05
	0.05	0.05
	0.05	0.05
	0.05	0.05
	0.05	0.05
	0.05	0.05
	0.05	0.05
	0.05	0.05
	0.05	0.05
	0.05	0.05
	0.05	0.05
	0.05	0.05
	0.05	0.05
	0.05	0.05
	0.05	0.05
	0.05	0.05
	0.05	0.05
	0.05	0.05
	0.05	0.05
	0.05	0.05
	0.05	0.05
	0.05	0.05
	0.05	0.05
	0.05	0.05
	0.05	0.05
	0.05	0.05
	0.05	0.05
	0.05	0.05
	0.05	0.05
	0.05	0.06
	0.05	0.06
	0.05	0.06
	0.05	0.06
	0.05	0.06
	0.05	0.06
	0.05	0.06
	0.05	0.06
	0.05	0.06
	0.05	0.06
	0.05	0.06
	0.05	0.06
	0.05	0.06
	0.05	0.06
	0.05	0.06
	0.05	0.06
	0.05	0.06
	0.05	0.06
	0.05	0.06
	0.05	0.06
	0.05	0.06
	0.05	0.06
	0.05	0.06
	0.05	0.06
	0.05	0.06
	0.05	0.06
	0.05	0.06
	0.05	0.06
	0.05	0.06
	0.06	0.06
	0.06	0.06
	0.06	0.06
	0.06	0.06
	0.06	0.06
	0.06	0.06
	0.06	0.06
	0.06	0.06
	0.06	0.06
	0.06	0.06
	0.06	0.06
	0.06	0.06
	0.06	0.06
	0.06	0.07
	0.06	0.07
	0.06	0.07
	0.06	0.07
	0.06	0.07
	0.06	0.07
	0.06	0.07
	0.06	0.07
	0.06	0.07
	0.06	0.07
	0.06	0.07
	0.06	0.07
	0.06	0.07
	0.06	0.07
	0.06	0.07
	0.06	0.07
	0.06	0.07
	0.06	0.07
	0.06	0.07
	0.06	0.07
	0.06	0.07
	0.06	0.07
	0.06	0.07
	0.06	0.07
	0.06	0.07
	0.06	0.07
	0.06	0.07
	0.06	0.07
	0.06	0.07
	0.06	0.07
	0.06	0.07
	0.06	0.07
	0.06	0.07
	0.06	0.07
	0.06	0.07
	0.07	0.07
	0.07	0.07
	0.07	0.07
	0.07	0.07
	0.07	0.08
	0.07	0.08
	0.07	0.08
	0.07	0.08
	0.07	0.08
	0.07	0.08
	0.07	0.08
	0.07	0.08
	0.07	0.08
	0.07	0.08
	0.07	0.08
	0.07	0.08
	0.07	0.08
	0.07	0.08
	0.07	0.08
	0.07	0.08
	0.07	0.08
	0.07	0.08
	0.07	0.08
	0.07	0.08
	0.07	0.08
	0.07	0.08
	0.07	0.08
	0.07	0.08
	0.07	0.08
	0.07	0.08
	0.07	0.08
	0.07	0.08
	0.07	0.08
	0.07	0.09
	0.07	0.09
	0.07	0.09
	0.07	0.09
	0.07	0.09
	0.07	0.09
	0.07	0.09
	0.07	0.09
	0.07	0.09
	0.07	0.09
	0.07	0.09
	0.07	0.09
	0.07	0.09
	0.07	0.09
	0.07	0.09
	0.07	0.09
	0.08	0.09
	0.08	0.09
	0.08	0.09
	0.08	0.09
	0.08	0.09
	0.08	0.09
	0.08	0.09
	0.08	0.09
	0.08	0.09
	0.08	0.09
	0.08	0.09
	0.08	0.09
	0.08	0.09
	0.08	0.09
	0.08	0.09
	0.08	0.09
	0.08	0.09
	0.08	0.1
	0.08	0.1
	0.08	0.1
	0.08	0.1
	0.08	0.1
	0.08	0.1
	0.08	0.1
	0.08	0.1
	0.08	0.1
	0.08	0.1
	0.08	0.1
	0.08	0.1
	0.08	0.1
	0.08	0.1
	0.08	0.1
	0.08	0.1
	0.08	0.1
	0.08	0.1
	0.08	0.1
	0.08	0.1
	0.09	0.1
	0.09	0.1
	0.09	0.1
	0.09	0.1
	0.09	0.1
	0.09	0.1
	0.09	0.1
	0.09	0.1
	0.09	0.11
	0.09	0.11
	0.09	0.11
	0.09	0.11
	0.09	0.11
	0.09	0.11
	0.09	0.11
	0.09	0.11
	0.09	0.11
	0.09	0.11
	0.09	0.11
	0.09	0.11
	0.09	0.11
	0.09	0.11
	0.09	0.11
	0.09	0.11
	0.09	0.11
	0.09	0.11
	0.09	0.11
	0.09	0.11
	0.09	0.11
	0.1	0.11
	0.1	0.11
	0.1	0.11
	0.1	0.12
	0.1	0.12
	0.1	0.12
	0.1	0.12
	0.1	0.12
	0.1	0.12
	0.1	0.12
	0.1	0.12
	0.1	0.12
	0.1	0.12
	0.1	0.12
	0.1	0.12
	0.1	0.12
	0.1	0.12
	0.1	0.12
	0.1	0.12
	0.1	0.12
	0.1	0.12
	0.1	0.12
	0.1	0.12
	0.1	0.12
	0.1	0.12
	0.1	0.12
	0.1	0.12
	0.1	0.12
	0.1	0.12
	0.1	0.12
	0.1	0.12
	0.1	0.12
	0.1	0.13
	0.1	0.13
	0.11	0.13
	0.11	0.13
	0.11	0.13
	0.11	0.13
	0.11	0.13
	0.11	0.13
	0.11	0.13
	0.11	0.13
	0.11	0.13
	0.11	0.13
	0.11	0.13
	0.11	0.13
	0.11	0.13
	0.11	0.13
	0.11	0.13
	0.11	0.14
	0.11	0.14
	0.11	0.14
	0.11	0.14
	0.11	0.14
	0.11	0.14
	0.11	0.14
	0.11	0.14
	0.11	0.14
	0.11	0.14
	0.11	0.14
	0.11	0.14
	0.11	0.14
	0.11	0.14
	0.11	0.14
	0.11	0.14
	0.11	0.14
	0.11	0.14
	0.12	0.14
	0.12	0.14
	0.12	0.14
	0.12	0.15
	0.12	0.15
	0.12	0.15
	0.12	0.15
	0.12	0.15
	0.12	0.15
	0.12	0.15
	0.12	0.15
	0.12	0.15
	0.12	0.15
	0.12	0.15
	0.12	0.15
	0.12	0.15
	0.12	0.15
	0.12	0.15
	0.12	0.15
	0.12	0.15
	0.12	0.15
	0.12	0.15
	0.12	0.15
	0.12	0.15
	0.12	0.15
	0.13	0.15
	0.13	0.15
	0.13	0.15
	0.13	0.16
	0.13	0.16
	0.13	0.16
	0.13	0.16
	0.13	0.16
	0.13	0.16
	0.13	0.16
	0.13	0.16
	0.13	0.16
	0.13	0.16
	0.13	0.16
	0.13	0.16
	0.13	0.16
	0.13	0.16
	0.13	0.16
	0.13	0.16
	0.13	0.16
	0.13	0.16
	0.13	0.16
	0.13	0.16
	0.13	0.16
	0.13	0.17
	0.13	0.17
	0.14	0.17
	0.14	0.17
	0.14	0.17
	0.14	0.17
	0.14	0.17
	0.14	0.17
	0.14	0.17
	0.14	0.17
	0.14	0.17
	0.14	0.17
	0.14	0.17
	0.14	0.17
	0.14	0.17
	0.14	0.17
	0.14	0.17
	0.14	0.17
	0.14	0.17
	0.14	0.17
	0.14	0.17
	0.14	0.17
	0.14	0.17
	0.14	0.17
	0.14	0.18
	0.14	0.18
	0.14	0.18
	0.14	0.18
	0.14	0.18
	0.14	0.18
	0.14	0.18
	0.14	0.18
	0.14	0.18
	0.14	0.18
	0.14	0.18
	0.14	0.18
	0.14	0.18
	0.14	0.18
	0.14	0.18
	0.14	0.19
	0.14	0.19
	0.15	0.19
	0.15	0.19
	0.15	0.19
	0.15	0.19
	0.15	0.19
	0.15	0.19
	0.15	0.19
	0.15	0.19
	0.15	0.19
	0.15	0.19
	0.15	0.19
	0.15	0.2
	0.15	0.2
	0.15	0.2
	0.15	0.2
	0.15	0.2
	0.15	0.2
	0.15	0.2
	0.15	0.2
	0.15	0.2
	0.15	0.2
	0.15	0.2
	0.15	0.2
	0.16	0.2
	0.16	0.2
	0.16	0.2
	0.16	0.2
	0.16	0.2
	0.16	0.21
	0.16	0.21
	0.16	0.21
	0.16	0.21
	0.16	0.21
	0.16	0.21
	0.16	0.21
	0.16	0.21
	0.16	0.21
	0.16	0.21
	0.16	0.21
	0.16	0.21
	0.16	0.21
	0.16	0.21
	0.16	0.21
	0.16	0.22
	0.16	0.22
	0.16	0.22
	0.16	0.22
	0.16	0.22
	0.16	0.22
	0.16	0.22
	0.16	0.22
	0.16	0.22
	0.16	0.23
	0.16	0.23
	0.16	0.23
	0.16	0.23
	0.16	0.23
	0.16	0.23
	0.17	0.23
	0.17	0.23
	0.17	0.23
	0.17	0.23
	0.17	0.23
	0.17	0.23
	0.17	0.23
	0.17	0.24
	0.17	0.24
	0.17	0.24
	0.17	0.24
	0.17	0.24
	0.17	0.24
	0.17	0.24
	0.17	0.24
	0.17	0.24
	0.17	0.24
	0.17	0.24
	0.17	0.24
	0.17	0.24
	0.17	0.24
	0.17	0.25
	0.18	0.25
	0.18	0.25
	0.18	0.25
	0.18	0.25
	0.18	0.25
	0.18	0.25
	0.18	0.25
	0.18	0.25
	0.18	0.25
	0.18	0.25
	0.18	0.25
	0.18	0.26
	0.18	0.26
	0.18	0.26
	0.19	0.26
	0.19	0.26
	0.19	0.26
	0.19	0.26
	0.19	0.26
	0.19	0.26
	0.19	0.26
	0.19	0.26
	0.19	0.26
	0.19	0.27
	0.19	0.27
	0.19	0.27
	0.19	0.27
	0.19	0.27
	0.19	0.27
	0.19	0.27
	0.19	0.27
	0.2	0.27
	0.2	0.27
	0.2	0.27
	0.2	0.27
	0.2	0.27
	0.2	0.27
	0.2	0.28
	0.2	0.28
	0.2	0.28
	0.2	0.28
	0.2	0.28
	0.2	0.28
	0.2	0.28
	0.2	0.28
	0.2	0.28
	0.2	0.28
	0.2	0.29
	0.2	0.29
	0.2	0.29
	0.2	0.29
	0.2	0.29
	0.2	0.29
	0.21	0.29
	0.21	0.29
	0.21	0.29
	0.21	0.29
	0.21	0.29
	0.21	0.29
	0.21	0.29
	0.21	0.29
	0.21	0.29
	0.21	0.29
	0.21	0.3
	0.21	0.3
	0.21	0.3
	0.21	0.3
	0.21	0.3
	0.21	0.3
	0.21	0.3
	0.22	0.3
	0.22	0.3
	0.22	0.3
	0.22	0.3
	0.22	0.3
	0.22	0.31
	0.22	0.31
	0.22	0.31
	0.22	0.31
	0.22	0.31
	0.22	0.31
	0.22	0.31
	0.22	0.31
	0.22	0.31
	0.22	0.31
	0.23	0.32
	0.23	0.32
	0.23	0.32
	0.23	0.32
	0.23	0.32
	0.23	0.32
	0.23	0.32
	0.23	0.32
	0.23	0.32
	0.23	0.32
	0.23	0.32
	0.23	0.32
	0.23	0.32
	0.23	0.32
	0.23	0.32
	0.23	0.32
	0.23	0.33
	0.23	0.33
	0.23	0.33
	0.23	0.33
	0.23	0.33
	0.24	0.33
	0.24	0.33
	0.24	0.33
	0.24	0.33
	0.24	0.33
	0.24	0.33
	0.24	0.33
	0.24	0.34
	0.24	0.34
	0.24	0.34
	0.24	0.34
	0.24	0.34
	0.24	0.34
	0.25	0.34
	0.25	0.34
	0.25	0.34
	0.25	0.34
	0.25	0.34
	0.25	0.35
	0.25	0.35
	0.25	0.35
	0.25	0.35
	0.25	0.35
	0.26	0.35
	0.26	0.35
	0.26	0.35
	0.26	0.35
	0.26	0.35
	0.26	0.35
	0.26	0.36
	0.26	0.36
	0.26	0.36
	0.26	0.36
	0.26	0.36
	0.27	0.36
	0.27	0.36
	0.27	0.36
	0.27	0.36
	0.27	0.36
	0.27	0.36
	0.27	0.37
	0.27	0.37
	0.27	0.37
	0.27	0.37
	0.27	0.37
	0.28	0.37
	0.28	0.37
	0.28	0.37
	0.28	0.37
	0.28	0.38
	0.28	0.38
	0.28	0.38
	0.28	0.38
	0.28	0.39
	0.28	0.39
	0.29	0.39
	0.29	0.39
	0.29	0.39
	0.29	0.39
	0.29	0.39
	0.29	0.39
	0.29	0.39
	0.29	0.39
	0.29	0.39
	0.29	0.39
	0.29	0.39
	0.29	0.4
	0.29	0.4
	0.3	0.4
	0.3	0.4
	0.3	0.4
	0.3	0.41
	0.3	0.41
	0.3	0.41
	0.3	0.41
	0.3	0.41
	0.3	0.42
	0.3	0.42
	0.3	0.42
	0.3	0.42
	0.3	0.43
	0.3	0.43
	0.3	0.43
	0.3	0.43
	0.3	0.43
	0.3	0.44
	0.31	0.44
	0.31	0.44
	0.31	0.44
	0.31	0.44
	0.31	0.45
	0.31	0.45
	0.31	0.45
	0.31	0.45
	0.31	0.46
	0.31	0.46
	0.31	0.46
	0.31	0.46
	0.31	0.46
	0.31	0.46
	0.31	0.46
	0.32	0.46
	0.32	0.46
	0.32	0.46
	0.32	0.47
	0.32	0.47
	0.32	0.47
	0.32	0.48
	0.33	0.48
	0.33	0.48
	0.33	0.48
	0.33	0.49
	0.33	0.49
	0.33	0.49
	0.33	0.49
	0.33	0.49
	0.33	0.49
	0.34	0.49
	0.34	0.49
	0.34	0.5
	0.34	0.5
	0.34	0.5
	0.34	0.51
	0.34	0.51
	0.34	0.51
	0.34	0.51
	0.34	0.52
	0.35	0.52
	0.35	0.52
	0.35	0.53
	0.35	0.53
	0.35	0.53
	0.35	0.53
	0.35	0.54
	0.35	0.54
	0.35	0.54
	0.35	0.55
	0.36	0.55
	0.36	0.56
	0.36	0.56
	0.36	0.56
	0.36	0.56
	0.36	0.57
	0.36	0.57
	0.36	0.57
	0.37	0.57
	0.37	0.57
	0.37	0.57
	0.37	0.58
	0.37	0.58
	0.37	0.58
	0.37	0.58
	0.37	0.59
	0.37	0.59
	0.37	0.59
	0.38	0.59
	0.38	0.59
	0.38	0.59
	0.38	0.59
	0.38	0.59
	0.38	0.6
	0.38	0.6
	0.38	0.6
	0.38	0.6
	0.38	0.61
	0.38	0.61
	0.39	0.61
	0.39	0.61
	0.39	0.61
	0.39	0.62
	0.39	0.62
	0.39	0.62
	0.39	0.62
	0.4	0.62
	0.4	0.62
	0.4	0.62
	0.4	0.63
	0.4	0.63
	0.4	0.63
	0.4	0.63
	0.4	0.64
	0.4	0.64
	0.4	0.64
	0.41	0.64
	0.41	0.65
	0.41	0.65
	0.41	0.65
	0.41	0.65
	0.41	0.66
	0.41	0.66
	0.42	0.66
	0.42	0.67
	0.42	0.67
	0.42	0.67
	0.42	0.67
	0.42	0.68
	0.42	0.68
	0.42	0.68
	0.42	0.68
	0.42	0.68
	0.43	0.68
	0.43	0.69
	0.43	0.69
	0.43	0.69
	0.43	0.69
	0.43	0.7
	0.43	0.7
	0.44	0.71
	0.44	0.71
	0.44	0.72
	0.44	0.73
	0.44	0.73
	0.44	0.73
	0.45	0.74
	0.45	0.74
	0.45	0.74
	0.45	0.74
	0.45	0.75
	0.45	0.75
	0.45	0.75
	0.46	0.75
	0.46	0.76
	0.46	0.76
	0.46	0.77
	0.46	0.78
	0.46	0.78
	0.47	0.78
	0.47	0.78
	0.47	0.78
	0.47	0.78
	0.47	0.78
	0.47	0.79
	0.48	0.8
	0.48	0.8
	0.48	0.8
	0.48	0.81
	0.48	0.82
	0.48	0.82
	0.48	0.83
	0.48	0.84
	0.48	0.84
	0.49	0.85
	0.49	0.85
	0.49	0.86
	0.49	0.86
	0.49	0.86
	0.49	0.87
	0.49	0.87
	0.49	0.88
	0.5	0.88
	0.5	0.88
	0.5	0.88
	0.5	0.89
	0.51	0.89
	0.51	0.89
	0.51	0.89
	0.52	0.89
	0.52	0.9
	0.52	0.9
	0.52	0.9
	0.52	0.91
	0.53	0.91
	0.53	0.91
	0.53	0.92
	0.53	0.95
	0.53	0.95
	0.53	0.97
	0.53	0.98
	0.54	0.99
	0.54	0.99
	0.54	1
	0.54	1
	0.54	1.01
	0.54	1.01
	0.55	1.02
	0.55	1.02
	0.55	1.04
	0.55	1.05
	0.55	1.05
	0.55	1.05
	0.55	1.06
	0.55	1.06
	0.55	1.06
	0.55	1.07
	0.56	1.07
	0.56	1.08
	0.56	1.11
	0.56	1.14
	0.56	1.14
	0.56	1.14
	0.57	1.14
	0.57	1.15
	0.57	1.16
	0.58	1.16
	0.58	1.16
	0.58	1.17
	0.58	1.17
	0.58	1.17
	0.59	1.18
	0.59	1.19
	0.59	1.19
	0.59	1.22
	0.59	1.23
	0.59	1.24
	0.59	1.26
	0.59	1.26
	0.6	1.28
	0.6	1.29
	0.6	1.31
	0.61	1.31
	0.61	1.33
	0.61	1.33
	0.61	1.33
	0.61	1.35
	0.61	1.35
	0.61	1.36
	0.61	1.38
	0.62	1.38
	0.62	1.38
	0.62	1.41
	0.62	1.41
	0.62	1.42
	0.62	1.43
	0.63	1.43
	0.63	1.44
	0.63	1.45
	0.63	1.45
	0.63	1.48
	0.64	1.5
	0.64	1.5
	0.64	1.51
	0.64	1.52
	0.64	1.52
	0.64	1.53
	0.64	1.54
	0.65	1.54
	0.65	1.54
	0.66	1.56
	0.66	1.61
	0.67	1.63
	0.67	1.64
	0.67	1.67
	0.67	1.68
	0.68	1.69
	0.68	1.72
	0.68	1.73
	0.69	1.75
	0.69	1.76
	0.69	1.77
	0.7	1.78
	0.7	1.78
	0.71	1.78
	0.71	1.84
	0.72	1.85
	0.72	1.87
	0.72	1.89
	0.72	1.89
	0.74	1.94
	0.74	1.96
	0.74	1.99
	0.74	2
	0.74	2
	0.74	2.11
	0.74	2.13
	0.74	2.15
	0.75	2.2
	0.75	2.22
	0.75	2.23
	0.75	2.25
	0.76	2.28
	0.76	2.35
	0.76	2.43
	0.77	2.48
	0.77	2.5
	0.77	2.52
	0.77	2.63
	0.77	2.64
	0.77	2.65
	0.77	2.79
	0.77	2.91
	0.78	2.96
	0.78	2.97
	0.78	3.02
	0.78	3.04
	0.79	3.06
	0.8	3.07
	0.8	3.1
	0.81	3.19
	0.81	3.29
	0.81	3.39
	0.81	3.4
	0.82	3.47
	0.82	3.58
	0.82	3.64
	0.83	3.66
	0.83	3.69
	0.83	3.83
	0.84	4.07
	0.84	4.1
	0.85	4.1
	0.85	4.31
	0.85	4.47
	0.85	4.6
	0.85	4.81
	0.86	4.98
	0.86	5.86
	0.86	6.13
	0.87	6.61
	0.87	6.66
	0.87	6.73
	0.87	6.74
	0.88	6.79
	0.88	7.68
	0.89	11.23
	0.89
	0.91
	0.91
	0.92
	0.93
	0.93
	0.95
	0.95
	0.95
	0.95
	0.96
	0.96
	0.97
	0.97
	0.97
	0.98
	0.98
	0.98
	0.99
	0.99
	0.99
	0.99
	0.99
	0.99
	1
	1
	1
	1.01
	1.01
	1.01
	1.02
	1.02
	1.04
	1.04
	1.04
	1.04
	1.05
	1.06
	1.06
	1.07
	1.07
	1.08
	1.08
	1.08
	1.09
	1.09
	1.1
	1.1
	1.11
	1.11
	1.12
	1.13
	1.13
	1.14
	1.14
	1.14
	1.14
	1.15
	1.15
	1.16
	1.17
	1.18
	1.19
	1.2
	1.21
	1.21
	1.21
	1.21
	1.21
	1.23
	1.23
	1.25
	1.25
	1.26
	1.26
	1.28
	1.29
	1.29
	1.3
	1.31
	1.31
	1.32
	1.33
	1.33
	1.33
	1.33
	1.34
	1.34
	1.34
	1.34
	1.36
	1.36
	1.36
	1.36
	1.36
	1.4
	1.4
	1.4
	1.42
	1.43
	1.44
	1.45
	1.46
	1.47
	1.49
	1.49
	1.5
	1.51
	1.51
	1.53
	1.53
	1.55
	1.56
	1.59
	1.6
	1.62
	1.64
	1.66
	1.68
	1.68
	1.75
	1.75
	1.75
	1.75
	1.76
	1.77
	1.81
	1.81
	1.82
	1.83
	1.83
	1.85
	1.88
	1.92
	1.94
	1.95
	1.98
	2.02
	2.05
	2.09
	2.1
	2.1
	2.11
	2.14
	2.14
	2.16
	2.16
	2.16
	2.19
	2.22
	2.23
	2.25
	2.26
	2.26
	2.27
	2.28
	2.29
	2.31
	2.35
	2.35
	2.39
	2.41
	2.42
	2.49
	2.5
	2.51
	2.51
	2.52
	2.52
	2.53
	2.6
	2.61
	2.64
	2.67
	2.67
	2.68
	2.73
	2.79
	2.81
	2.87
	2.87
	2.89
	2.92
	3.07
	3.08
	3.15
	3.16
	3.21
	3.22
	3.26
	3.29
	3.48
	3.54
	3.71
	3.72
	3.77
	4
	4.11
	4.25
	4.29
	4.48
	4.53
	4.57
	4.59
	4.6
	4.62
	5.28
	5.37
	5.48
	5.56
	5.84
	5.95
	6.13
	6.47
	6.86
	6.9
	6.96
	7.23
	7.41
	7.84
	8.83
	10.12
	11.15
	11.58
	12.23
	12.67
	18.09
	19.48
