# Supplementary material for: STIM1-dependent peripheral coupling governs the contractility of vascular smooth muscle cells
Source: eLife. 2022 Feb 11;11:e70278. doi: 10.7554/eLife.70278 (PMC8947769; doi:10.7554/eLife.70278)
Supplement: Figure 3—source data 1. [file elife-70278-fig3-data1.xlsx]

## Sheet: Figure 3B
BK Cluster density	Control	STIM1 smKO		BK Cluster size	Individual Cluster areas (nm2)				Control	STIM1 smKO
Cell 1	11.1763	11.383			Control	STIM1 smKO		Number of values	44340	30552
Cell 2	7.19272	11.1881			400	400
Cell 3	9.41417	11.75			400	400		Minimum	400	400
Cell 4	8.64154	4.2526			400	400		25% Percentile	400	400
Cell 5	13.0804	6.11902			400	400		Median	1200	1200
Cell 6	17.3543	4.39354			400	400		75% Percentile	2400	2400
Cell 7	17.5239	9.52962			400	400		Maximum	686000	160000
Cell 8	15.0864	10.5007			400	400
Cell 9	12.5315	9.26631			400	400		Mean	2482	2059
Cell 10	10.5396	22.216			400	400		Std. Deviation	7061	3628
Cell 11	17.803	12.8893			400	400		Std. Error of Mean	33.53	20.76
Cell 12	22.2233	19.522			400	400
Cell 13	16.6987	19.2116			400	400		Lower 95% CI	2416	2018
Cell 14	22.6233	18.2776			400	400		Upper 95% CI	2548	2100
Cell 15	24.5035	16.4464			400	400
Cell 16	19.7129	14.928			400	400		Unpaired t test
Cell 17	18.292	21.8572			400	400		P value	<0.0001
Cell 18	25.3129	23.7282			400	400		Significantly different (P < 0.05)?	Yes
Cell 19	14.2833				400	400		One- or two-tailed P value?	Two-tailed
Cell 20	18.882				400	400
					400	400		Mean of column A	2482
Minimum	7.193	4.253			400	400		Mean of column B	2059
25% Percentile	11.52	9.464			400	400		Difference between means (B - A) ± SEM	-423.0 ± 43.92
Median	17.03	12.32			400	400		95% confidence interval	-509.0 to -336.9
75% Percentile	19.51	19.29			400	400
Maximum	25.31	23.73			400	400
					400	400
Mean	16.14	13.75			400	400
Std. Deviation	5.276	6.091			400	400
Std. Error of Mean	1.18	1.436			400	400
					400	400
Lower 95% CI	13.67	10.72			400	400
Upper 95% CI	18.61	16.78			400	400
					400	400
Unpaired t test					400	400
P value	0.2021				400	400
Significantly different (P < 0.05)?	No				400	400
One- or two-tailed P value?	Two-tailed				400	400
					400	400
Mean of column A	16.14				400	400
Mean of column B	13.75				400	400
Difference between means (B - A) ± SEM	-2.396 ± 1.844				400	400
95% confidence interval	-6.136 to 1.344				400	400
					400	400
					400	400
					400	400
					400	400
					400	400
					400	400
					400	400
					400	400
					400	400
					400	400
					400	400
					400	400
					400	400
					400	400
					400	400
					400	400
					400	400
					400	400
					400	400
					400	400
					400	400
					400	400
					400	400
					400	400
					400	400
					400	400
					400	400
					400	400
					400	400
					400	400
					400	400
					400	400
					400	400
					400	400
					400	400
					400	400
					400	400
					400	400
					400	400
					400	400
					400	400
					400	400
					400	400
					400	400
					400	400
					400	400
					400	400
					400	400
					400	400
					400	400
					400	400
					400	400
					400	400
					400	400
					400	400
					400	400
					400	400
					400	400
					400	400
					400	400
					400	400
					400	400
					400	400
					400	400
					400	400
					400	400
					400	400
					400	400
					400	400
					400	400
					400	400
					400	400
					400	400
					400	400
					400	400
					400	400
					400	400
					400	400
					400	400
					400	400
					400	400
					400	400
					400	400
					400	400
					400	400
					400	400
					400	400
					400	400
					400	400
					400	400
					400	400
					400	400
					400	400
					400	400
					400	400
					400	400
					400	400
					400	400
					400	400
					400	400
					400	400
					400	400
					400	400
					400	400
					400	400
					400	400
					400	400
					400	400
					400	400
					400	400
					400	400
					400	400
					400	400
					400	400
					400	400
					400	400
					400	400
					400	400
					400	400
					400	400
					400	400
					400	400
					400	400
					400	400
					400	400
					400	400
					400	400
					400	400
					400	400
					400	400
					400	400
					400	400
					400	400
					400	400
					400	400
					400	400
					400	400
					400	400
					400	400
					400	400
					400	400
					400	400
					400	400
					400	400
					400	400
					400	400
					400	400
					400	400
					400	400
					400	400
					400	400
					400	400
					400	400
					400	400
					400	400
					400	400
					400	400
					400	400
					400	400
					400	400
					400	400
					400	400
					400	400
					400	400
					400	400
					400	400
					400	400
					400	400
					400	400
					400	400
					400	400
					400	400
					400	400
					400	400
					400	400
					400	400
					400	400
					400	400
					400	400
					400	400
					400	400
					400	400
					400	400
					400	400
					400	400
					400	400
					400	400
					400	400
					400	400
					400	400
					400	400
					400	400
					400	400
					400	400
					400	400
					400	400
					400	400
					400	400
					400	400
					400	400
					400	400
					400	400
					400	400
					400	400
					400	400
					400	400
					400	400
					400	400
					400	400
					400	400
					400	400
					400	400
					400	400
					400	400
					400	400
					400	400
					400	400
					400	400
					400	400
					400	400
					400	400
					400	400
					400	400
					400	400
					400	400
					400	400
					400	400
					400	400
					400	400
					400	400
					400	400
					400	400
					400	400
					400	400
					400	400
					400	400
					400	400
					400	400
					400	400
					400	400
					400	400
					400	400
					400	400
					400	400
					400	400
					400	400
					400	400
					400	400
					400	400
					400	400
					400	400
					400	400
					400	400
					400	400
					400	400
					400	400
					400	400
					400	400
					400	400
					400	400
					400	400
					400	400
					400	400
					400	400
					400	400
					400	400
					400	400
					400	400
					400	400
					400	400
					400	400
					400	400
					400	400
					400	400
					400	400
					400	400
					400	400
					400	400
					400	400
					400	400
					400	400
					400	400
					400	400
					400	400
					400	400
					400	400
					400	400
					400	400
					400	400
					400	400
					400	400
					800	400
					800	400
					800	400
					800	400
					800	400
					800	400
					800	400
					800	400
					800	400
					800	400
					800	400
					800	400
					800	400
					800	400
					800	400
					800	400
					800	400
					800	400
					800	400
					800	400
					800	400
					800	400
					800	400
					800	400
					800	400
					800	400
					800	400
					800	400
					800	400
					800	400
					800	400
					800	400
					800	400
					800	400
					800	400
					800	400
					800	400
					800	400
					800	400
					800	400
					800	400
					800	400
					800	400
					800	400
					800	400
					800	400
					800	400
					800	400
					800	400
					800	400
					800	400
					800	400
					800	400
					800	400
					800	400
					800	400
					800	400
					800	400
					800	400
					800	400
					800	400
					800	400
					800	400
					800	400
					800	400
					800	400
					800	400
					800	400
					800	400
					800	400
					800	400
					800	400
					800	400
					800	400
					800	400
					800	400
					800	400
					800	400
					800	400
					800	400
					800	400
					800	400
					800	400
					800	400
					800	400
					800	400
					800	400
					800	400
					800	400
					800	400
					800	400
					800	400
					800	400
					800	400
					800	400
					800	400
					800	400
					800	400
					800	400
					800	400
					800	400
					800	400
					800	400
					800	400
					800	400
					800	400
					800	400
					800	400
					800	400
					800	400
					800	400
					800	400
					800	400
					800	400
					800	400
					800	400
					800	400
					800	400
					800	400
					800	400
					800	400
					800	400
					800	400
					800	400
					800	400
					800	400
					800	400
					800	400
					800	400
					800	400
					800	400
					800	400
					800	400
					800	400
					800	400
					800	400
					800	400
					800	400
					800	400
					800	400
					800	400
					800	400
					800	400
					800	400
					800	400
					800	400
					800	400
					800	400
					800	400
					800	400
					800	400
					800	400
					800	400
					800	400
					800	400
					800	400
					800	400
					800	400
					800	400
					800	400
					800	400
					800	400
					800	400
					800	400
					800	400
					800	400
					800	400
					800	400
					800	400
					800	400
					800	400
					800	400
					800	400
					800	400
					800	800
					800	800
					800	800
					800	800
					800	800
					800	800
					800	800
					800	800
					800	800
					800	800
					800	800
					800	800
					800	800
					800	800
					800	800
					800	800
					800	800
					800	800
					800	800
					800	800
					800	800
					800	800
					800	800
					800	800
					800	800
					800	800
					800	800
					1200	800
					1200	800
					1200	800
					1200	800
					1200	800
					1200	800
					1200	800
					1200	800
					1200	800
					1200	800
					1200	800
					1200	800
					1200	800
					1200	800
					1200	800
					1200	800
					1200	800
					1200	800
					1200	800
					1200	800
					1200	800
					1200	800
					1200	800
					1200	800
					1200	800
					1200	800
					1200	800
					1200	800
					1200	800
					1200	800
					1200	800
					1200	800
					1200	800
					1200	800
					1200	800
					1200	800
					1200	800
					1200	800
					1200	800
					1200	800
					1200	800
					1200	800
					1200	800
					1200	800
					1200	800
					1200	800
					1200	800
					1200	800
					1200	800
					1200	800
					1200	800
					1200	800
					1200	800
					1200	800
					1200	800
					1200	800
					1200	800
					1200	800
					1200	800
					1200	800
					1200	800
					1200	800
					1200	800
					1200	800
					1200	800
					1200	800
					1200	800
					1200	800
					1200	800
					1200	800
					1200	800
					1200	800
					1200	800
					1200	800
					1200	800
					1200	800
					1200	800
					1200	800
					1200	800
					1200	800
					1200	800
					1200	800
					1200	800
					1200	800
					1200	800
					1200	800
					1200	800
					1200	800
					1200	800
					1200	800
					1200	800
					1200	800
					1200	800
					1200	800
					1200	800
					1200	800
					1200	800
					1200	800
					1200	800
					1200	800
					1200	800
					1200	800
					1200	800
					1200	800
					1200	800
					1200	800
					1200	800
					1200	800
					1200	800
					1200	800
					1200	800
					1200	800
					1200	800
					1200	800
					1200	800
					1200	800
					1200	800
					1200	800
					1200	800
					1200	800
					1200	800
					1200	800
					1200	800
					1200	800
					1200	800
					1200	800
					1200	800
					1200	800
					1200	800
					1200	800
					1200	800
					1200	800
					1200	800
					1200	800
					1200	800
					1600	800
					1600	800
					1600	800
					1600	800
					1600	800
					1600	800
					1600	800
					1600	800
					1600	800
					1600	800
					1600	800
					1600	800
					1600	800
					1600	800
					1600	800
					1600	800
					1600	800
					1600	800
					1600	800
					1600	800
					1600	800
					1600	800
					1600	800
					1600	800
					1600	800
					1600	800
					1600	800
					1600	800
					1600	800
					1600	800
					1600	800
					1600	800
					1600	800
					1600	800
					1600	800
					1600	800
					1600	800
					1600	800
					1600	800
					1600	800
					1600	800
					1600	800
					1600	800
					1600	800
					1600	800
					1600	800
					1600	800
					1600	800
					1600	800
					1600	800
					1600	800
					1600	800
					1600	800
					1600	800
					1600	800
					1600	800
					1600	800
					1600	800
					1600	800
					1600	800
					1600	800
					1600	800
					1600	800
					1600	800
					1600	800
					1600	800
					1600	800
					1600	800
					1600	800
					1600	800
					1600	800
					1600	800
					1600	800
					1600	800
					1600	800
					1600	800
					1600	800
					1600	800
					1600	800
					1600	800
					1600	800
					1600	800
					1600	800
					1600	800
					1600	800
					1600	800
					1600	800
					1600	800
					1600	800
					2000	1200
					2000	1200
					2000	1200
					2000	1200
					2000	1200
					2000	1200
					2000	1200
					2000	1200
					2000	1200
					2000	1200
					2000	1200
					2000	1200
					2000	1200
					2000	1200
					2000	1200
					2000	1200
					2000	1200
					2000	1200
					2000	1200
					2000	1200
					2000	1200
					2000	1200
					2000	1200
					2000	1200
					2000	1200
					2000	1200
					2000	1200
					2000	1200
					2000	1200
					2000	1200
					2000	1200
					2000	1200
					2000	1200
					2000	1200
					2000	1200
					2000	1200
					2000	1200
					2000	1200
					2000	1200
					2000	1200
					2000	1200
					2000	1200
					2000	1200
					2000	1200
					2000	1200
					2000	1200
					2000	1200
					2000	1200
					2000	1200
					2000	1200
					2000	1200
					2000	1200
					2000	1200
					2000	1200
					2000	1200
					2000	1200
					2000	1200
					2000	1200
					2000	1200
					2000	1200
					2000	1200
					2400	1200
					2400	1200
					2400	1200
					2400	1200
					2400	1200
					2400	1200
					2400	1200
					2400	1200
					2400	1200
					2400	1200
					2400	1200
					2400	1200
					2400	1200
					2400	1200
					2400	1200
					2400	1200
					2400	1200
					2400	1200
					2400	1200
					2400	1200
					2400	1200
					2400	1200
					2400	1200
					2400	1200
					2400	1200
					2400	1200
					2400	1200
					2400	1200
					2400	1200
					2400	1200
					2400	1200
					2400	1200
					2400	1200
					2400	1200
					2800	1200
					2800	1200
					2800	1200
					2800	1200
					2800	1200
					2800	1200
					2800	1200
					2800	1200
					2800	1200
					2800	1200
					2800	1200
					2800	1200
					2800	1200
					2800	1200
					2800	1200
					2800	1200
					2800	1200
					2800	1200
					2800	1200
					2800	1200
					2800	1200
					2800	1200
					2800	1200
					2800	1200
					2800	1200
					2800	1200
					2800	1200
					2800	1200
					3200	1200
					3200	1200
					3200	1200
					3200	1200
					3200	1200
					3200	1200
					3200	1200
					3200	1200
					3200	1200
					3200	1200
					3200	1200
					3200	1200
					3200	1200
					3200	1200
					3200	1200
					3200	1200
					3600	1200
					3600	1200
					3600	1200
					3600	1200
					3600	1200
					3600	1200
					3600	1200
					3600	1200
					3600	1200
					3600	1200
					4000	1200
					4000	1200
					4000	1200
					4000	1200
					4000	1200
					4000	1200
					4000	1200
					4000	1200
					4000	1200
					4000	1200
					4000	1200
					4000	1200
					4000	1600
					4000	1600
					4000	1600
					4400	1600
					4400	1600
					4400	1600
					4400	1600
					4400	1600
					4800	1600
					4800	1600
					4800	1600
					4800	1600
					5600	1600
					5600	1600
					5600	1600
					5600	1600
					6400	1600
					6400	1600
					6800	1600
					6800	1600
					7200	1600
					7200	1600
					7200	1600
					7200	1600
					8000	1600
					8400	1600
					8800	1600
					12000	1600
					15600	1600
					16000	1600
					25200	1600
					28000	1600
					33600	1600
					94800	1600
					400	1600
					400	1600
					400	1600
					400	1600
					400	1600
					400	1600
					400	1600
					400	1600
					400	1600
					400	1600
					400	1600
					400	1600
					400	1600
					400	1600
					400	1600
					400	1600
					400	1600
					400	1600
					400	1600
					400	1600
					400	1600
					400	1600
					400	1600
					400	1600
					400	1600
					400	1600
					400	1600
					400	1600
					400	1600
					400	1600
					400	1600
					400	1600
					400	1600
					400	1600
					400	1600
					400	1600
					400	1600
					400	1600
					400	1600
					400	1600
					400	1600
					400	1600
					400	1600
					400	1600
					400	1600
					400	1600
					400	1600
					400	1600
					400	1600
					400	1600
					400	1600
					400	1600
					400	1600
					400	1600
					400	1600
					400	1600
					400	1600
					400	1600
					400	1600
					400	1600
					400	1600
					400	1600
					400	1600
					400	1600
					400	1600
					400	1600
					400	1600
					400	1600
					400	1600
					400	1600
					400	1600
					400	1600
					400	1600
					400	1600
					400	1600
					400	1600
					400	1600
					400	1600
					400	1600
					400	1600
					400	1600
					400	1600
					400	1600
					400	1600
					400	1600
					400	1600
					400	1600
					400	1600
					400	1600
					400	1600
					400	1600
					400	2000
					400	2000
					400	2000
					400	2000
					400	2000
					400	2000
					400	2000
					400	2000
					400	2000
					400	2000
					400	2000
					400	2000
					400	2000
					400	2000
					400	2000
					400	2000
					400	2000
					400	2000
					400	2000
					400	2000
					400	2000
					400	2000
					400	2000
					400	2000
					400	2000
					400	2000
					400	2000
					400	2000
					400	2000
					400	2000
					400	2000
					400	2000
					400	2000
					400	2000
					400	2000
					400	2000
					400	2000
					400	2000
					400	2000
					400	2000
					400	2000
					400	2000
					400	2000
					400	2000
					400	2000
					400	2000
					400	2000
					400	2000
					400	2000
					400	2000
					400	2000
					400	2000
					400	2000
					400	2000
					400	2000
					400	2000
					400	2000
					400	2000
					400	2000
					400	2000
					400	2000
					400	2000
					400	2000
					400	2000
					400	2000
					400	2000
					400	2000
					400	2000
					400	2000
					400	2000
					400	2000
					400	2000
					400	2000
					400	2000
					400	2000
					400	2000
					400	2000
					400	2000
					400	2000
					400	2000
					400	2000
					400	2000
					400	2000
					400	2400
					400	2400
					400	2400
					400	2400
					400	2400
					400	2400
					400	2400
					400	2400
					400	2400
					400	2400
					400	2400
					400	2400
					400	2400
					400	2400
					400	2400
					400	2400
					400	2400
					400	2400
					400	2400
					400	2400
					400	2400
					400	2400
					400	2400
					400	2400
					400	2400
					400	2400
					400	2400
					400	2400
					400	2400
					400	2400
					400	2400
					400	2400
					400	2400
					400	2400
					400	2400
					400	2400
					400	2400
					400	2400
					400	2400
					400	2400
					400	2400
					400	2400
					400	2400
					400	2400
					400	2400
					400	2400
					400	2400
					400	2400
					400	2400
					400	2400
					400	2400
					400	2400
					400	2400
					400	2400
					400	2400
					400	2400
					400	2400
					400	2400
					400	2400
					400	2400
					400	2400
					400	2400
					400	2400
					400	2800
					400	2800
					400	2800
					400	2800
					400	2800
					400	2800
					400	2800
					400	2800
					400	2800
					400	2800
					400	2800
					400	2800
					400	2800
					400	2800
					400	2800
					400	2800
					400	2800
					400	2800
					400	2800
					400	2800
					400	2800
					400	2800
					400	2800
					400	2800
					400	2800
					400	2800
					400	2800
					400	2800
					400	2800
					400	2800
					400	2800
					400	2800
					400	2800
					400	2800
					400	2800
					400	2800
					400	2800
					400	3200
					400	3200
					400	3200
					400	3200
					400	3200
					400	3200
					400	3200
					400	3200
					400	3200
					400	3200
					400	3200
					400	3200
					400	3200
					400	3200
					400	3200
					400	3200
					400	3200
					400	3200
					400	3200
					400	3200
					400	3200
					400	3600
					400	3600
					400	3600
					400	3600
					400	3600
					400	3600
					400	3600
					400	3600
					400	3600
					400	3600
					400	3600
					400	4000
					400	4000
					400	4000
					400	4000
					400	4000
					400	4000
					400	4000
					400	4000
					400	4000
					400	4400
					400	4400
					400	4400
					400	4400
					400	4400
					400	4400
					400	4400
					400	4400
					400	4400
					400	4400
					400	4400
					400	4400
					400	4400
					400	4800
					400	4800
					400	4800
					400	4800
					400	4800
					400	4800
					400	4800
					400	5200
					400	5200
					400	5200
					400	5600
					400	5600
					400	6000
					400	6400
					400	6400
					400	6400
					400	6800
					400	6800
					400	7200
					400	7200
					400	7200
					400	7200
					400	7200
					400	8400
					400	8400
					400	8800
					400	8800
					800	10000
					800	10800
					800	13200
					800	14800
					800	15600
					800	28000
					800	400
					800	400
					800	400
					800	400
					800	400
					800	400
					800	400
					800	400
					800	400
					800	400
					800	400
					800	400
					800	400
					800	400
					800	400
					800	400
					800	400
					800	400
					800	400
					800	400
					800	400
					800	400
					800	400
					800	400
					800	400
					800	400
					800	400
					800	400
					800	400
					800	400
					800	400
					800	400
					800	400
					800	400
					800	400
					800	400
					800	400
					800	400
					800	400
					800	400
					800	400
					800	400
					800	400
					800	400
					800	400
					800	400
					800	400
					800	400
					800	400
					800	400
					800	400
					800	400
					800	400
					800	400
					800	400
					800	400
					800	400
					800	400
					800	400
					800	400
					800	400
					800	400
					800	400
					800	400
					800	400
					800	400
					800	400
					800	400
					800	400
					800	400
					800	400
					800	400
					800	400
					800	400
					800	400
					800	400
					800	400
					800	400
					800	400
					800	400
					800	400
					800	400
					800	400
					800	400
					800	400
					800	400
					800	400
					800	400
					800	400
					800	400
					800	400
					800	400
					800	400
					800	400
					800	400
					800	400
					800	400
					800	400
					800	400
					800	400
					800	400
					800	400
					800	400
					800	400
					800	400
					800	400
					800	400
					800	400
					800	400
					800	400
					800	400
					800	400
					800	400
					800	400
					800	400
					800	400
					800	400
					800	400
					800	400
					800	400
					800	400
					800	400
					800	400
					800	400
					800	400
					800	400
					800	400
					800	400
					800	400
					800	400
					800	400
					800	400
					800	400
					800	400
					800	400
					800	400
					800	400
					800	400
					800	400
					800	400
					800	400
					800	400
					800	400
					800	400
					800	400
					800	400
					800	400
					800	400
					800	400
					800	400
					800	400
					800	400
					800	400
					800	400
					800	400
					800	400
					800	400
					800	400
					800	400
					800	400
					800	400
					800	400
					800	400
					800	400
					800	400
					800	400
					800	400
					800	400
					800	400
					800	400
					1200	400
					1200	400
					1200	400
					1200	400
					1200	400
					1200	400
					1200	400
					1200	400
					1200	400
					1200	400
					1200	400
					1200	400
					1200	400
					1200	400
					1200	400
					1200	400
					1200	400
					1200	400
					1200	400
					1200	400
					1200	400
					1200	400
					1200	400
					1200	400
					1200	400
					1200	400
					1200	400
					1200	400
					1200	400
					1200	400
					1200	400
					1200	400
					1200	400
					1200	400
					1200	400
					1200	400
					1200	400
					1200	400
					1200	400
					1200	400
					1200	400
					1200	400
					1200	400
					1200	400
					1200	400
					1200	400
					1200	400
					1200	400
					1200	400
					1200	400
					1200	400
					1200	400
					1200	400
					1200	400
					1200	400
					1200	400
					1200	400
					1200	400
					1200	400
					1200	400
					1200	400
					1200	400
					1200	400
					1200	400
					1200	400
					1200	400
					1200	400
					1200	400
					1200	400
					1200	400
					1200	400
					1200	400
					1200	400
					1200	400
					1200	400
					1200	400
					1200	400
					1200	400
					1200	400
					1200	400
					1200	400
					1200	400
					1200	400
					1200	400
					1200	400
					1200	400
					1200	400
					1200	400
					1200	400
					1200	400
					1200	400
					1200	400
					1200	400
					1200	400
					1200	400
					1200	400
					1200	400
					1200	400
					1200	400
					1200	400
					1200	400
					1200	400
					1200	400
					1200	400
					1200	400
					1200	400
					1200	400
					1200	400
					1200	400
					1200	400
					1200	400
					1200	400
					1200	400
					1200	400
					1200	400
					1200	400
					1200	400
					1200	400
					1200	400
					1200	400
					1200	400
					1200	400
					1200	400
					1200	400
					1200	400
					1200	400
					1200	400
					1200	400
					1200	400
					1600	400
					1600	400
					1600	400
					1600	400
					1600	400
					1600	400
					1600	400
					1600	400
					1600	400
					1600	400
					1600	400
					1600	400
					1600	400
					1600	400
					1600	400
					1600	400
					1600	400
					1600	400
					1600	400
					1600	400
					1600	400
					1600	400
					1600	400
					1600	400
					1600	400
					1600	400
					1600	400
					1600	400
					1600	400
					1600	400
					1600	400
					1600	400
					1600	400
					1600	400
					1600	400
					1600	400
					1600	400
					1600	400
					1600	400
					1600	400
					1600	800
					1600	800
					1600	800
					1600	800
					1600	800
					1600	800
					1600	800
					1600	800
					1600	800
					1600	800
					1600	800
					1600	800
					1600	800
					1600	800
					1600	800
					1600	800
					1600	800
					1600	800
					1600	800
					1600	800
					1600	800
					1600	800
					1600	800
					1600	800
					1600	800
					1600	800
					1600	800
					1600	800
					1600	800
					1600	800
					1600	800
					1600	800
					1600	800
					1600	800
					1600	800
					1600	800
					1600	800
					1600	800
					1600	800
					1600	800
					1600	800
					1600	800
					1600	800
					1600	800
					1600	800
					1600	800
					2000	800
					2000	800
					2000	800
					2000	800
					2000	800
					2000	800
					2000	800
					2000	800
					2000	800
					2000	800
					2000	800
					2000	800
					2000	800
					2000	800
					2000	800
					2000	800
					2000	800
					2000	800
					2000	800
					2000	800
					2000	800
					2000	800
					2000	800
					2000	800
					2000	800
					2000	800
					2000	800
					2000	800
					2000	800
					2000	800
					2000	800
					2000	800
					2000	800
					2000	800
					2000	800
					2400	800
					2400	800
					2400	800
					2400	800
					2400	800
					2400	800
					2400	800
					2400	800
					2400	800
					2400	800
					2400	800
					2400	800
					2400	800
					2400	800
					2400	800
					2400	800
					2400	800
					2400	800
					2400	800
					2400	800
					2400	800
					2400	800
					2400	800
					2400	800
					2400	800
					2400	800
					2400	800
					2400	800
					2400	800
					2400	800
					2400	800
					2400	800
					2400	800
					2400	800
					2400	800
					2400	800
					2400	800
					2800	800
					2800	800
					2800	800
					2800	800
					2800	800
					2800	800
					2800	800
					2800	800
					2800	800
					2800	800
					2800	800
					2800	800
					2800	800
					2800	800
					2800	800
					2800	800
					2800	800
					2800	800
					2800	800
					2800	800
					2800	800
					2800	800
					3200	800
					3200	800
					3200	800
					3200	800
					3200	800
					3200	800
					3200	800
					3200	800
					3600	800
					3600	800
					3600	800
					3600	800
					3600	800
					3600	800
					3600	800
					3600	800
					4000	800
					4000	800
					4000	800
					4000	800
					4000	800
					4000	800
					4000	800
					4000	800
					4000	800
					4000	800
					4400	800
					4400	800
					4400	800
					4400	800
					5200	800
					5200	800
					5600	800
					6000	800
					7200	800
					7600	800
					7600	800
					8000	800
					9200	800
					11200	800
					14000	800
					22000	800
					400	800
					400	800
					400	800
					400	800
					400	800
					400	800
					400	800
					400	800
					400	800
					400	800
					400	800
					400	1200
					400	1200
					400	1200
					400	1200
					400	1200
					400	1200
					400	1200
					400	1200
					400	1200
					400	1200
					400	1200
					400	1200
					400	1200
					400	1200
					400	1200
					400	1200
					400	1200
					400	1200
					400	1200
					400	1200
					400	1200
					400	1200
					400	1200
					400	1200
					400	1200
					400	1200
					400	1200
					400	1200
					400	1200
					400	1200
					400	1200
					400	1200
					400	1200
					400	1200
					400	1200
					400	1200
					400	1200
					400	1200
					400	1200
					400	1200
					400	1200
					400	1200
					400	1200
					400	1200
					400	1200
					400	1200
					400	1200
					400	1200
					400	1200
					400	1200
					400	1200
					400	1200
					400	1200
					400	1200
					400	1200
					400	1200
					400	1200
					400	1200
					400	1200
					400	1200
					400	1200
					400	1200
					400	1200
					400	1200
					400	1200
					400	1200
					400	1200
					400	1200
					400	1200
					400	1200
					400	1200
					400	1200
					400	1200
					400	1200
					400	1200
					400	1200
					400	1200
					400	1200
					400	1200
					400	1200
					400	1200
					400	1200
					400	1200
					400	1200
					400	1200
					400	1200
					400	1200
					400	1200
					400	1200
					400	1200
					400	1200
					400	1200
					400	1200
					400	1200
					400	1200
					400	1200
					400	1200
					400	1200
					400	1200
					400	1200
					400	1200
					400	1200
					400	1200
					400	1200
					400	1200
					400	1200
					400	1200
					400	1200
					400	1200
					400	1200
					400	1200
					400	1200
					400	1200
					400	1200
					400	1200
					400	1200
					400	1200
					400	1200
					400	1200
					400	1200
					400	1200
					400	1200
					400	1200
					400	1200
					400	1200
					400	1200
					400	1200
					400	1200
					400	1200
					400	1200
					400	1200
					400	1200
					400	1200
					400	1200
					400	1600
					400	1600
					400	1600
					400	1600
					400	1600
					400	1600
					400	1600
					400	1600
					400	1600
					400	1600
					400	1600
					400	1600
					400	1600
					400	1600
					400	1600
					400	1600
					400	1600
					400	1600
[truncated: 42,342 more rows]

## Sheet: Figure 3C
RyR2 Cluster density	Control	STIM1 smKO		RyR2 Cluster size	Individual Cluster areas (nm2)				Control	STIM1 smKO
Cell 1	3.37751	4.9725			Control	STIM1 smKO		Number of values	15193	9702
Cell 2	2.0306	6.2168			800	800
Cell 3	3.32651	3.58722			800	800		Minimum	800	800
Cell 4	4.40103	3.0111			800	800		25% Percentile	800	800
Cell 5	3.28927	3.65916			800	800		Median	1200	1600
Cell 6	5.99388	1.69383			800	800		75% Percentile	2400	2800
Cell 7	5.54906	2.1464			800	800		Maximum	82000	110000
Cell 8	6.81849	2.9516			800	800
Cell 9	4.57625	2.68406			800	800		Mean	2260	2383
Cell 10	2.61932	6.67444			800	800		Std. Deviation	3057	3334
Cell 11	7.66566	4.18136			800	800		Std. Error of Mean	24.81	33.85
Cell 12	7.46528	4.95797			800	800
Cell 13	6.41054	4.20658			800	800		Lower 95% CI	2211	2317
Cell 14	4.511	4.4507			800	800		Upper 95% CI	2308	2449
Cell 15	6.73053	4.79251			800	800
Cell 16	9.61682	4.93135			800	800		Unpaired t test
Cell 17	4.83323	6.0639			800	800		P value	0.0027
Cell 18	5.91151	6.39762			800	800		Significantly different (P < 0.05)?	Yes
Cell 19	6.87992				800	800		One- or two-tailed P value?	Two-tailed
Cell 20	11.3187				800	800
					800	800		Mean of column A	2260
Minimum	2.031	1.694			800	800		Mean of column B	2383
25% Percentile	3.633	2.996			800	800		Difference between means (B - A) ± SEM	123.4 ± 41.17
Median	5.73	4.329			800	800		95% confidence interval	42.68 to 204.1
75% Percentile	6.865	5.245			800	800
Maximum	11.32	6.674			800	800
					800	800
Mean	5.666	4.31			800	800
Std. Deviation	2.33	1.472			800	800
Std. Error of Mean	0.521	0.3469			800	800
					800	800
Lower 95% CI	4.576	3.578			800	800
Upper 95% CI	6.757	5.042			800	800
					800	800
Unpaired t test					800	800
P value	0.0412				800	800
Significantly different (P < 0.05)?	Yes				800	800
One- or two-tailed P value?	Two-tailed				800	800
					800	800
Mean of column A	5.666				800	800
Mean of column B	4.31				800	800
Difference between means (B - A) ± SEM	-1.356 ± 0.6406				800	800
95% confidence interval	-2.656 to -0.05702				800	800
					800	800
					800	800
					800	800
					800	800
					800	800
					800	800
					800	800
					800	800
					800	800
					800	800
					800	800
					800	800
					800	800
					800	800
					800	800
					800	800
					800	800
					800	800
					800	800
					800	800
					800	800
					800	800
					800	800
					800	800
					800	800
					800	800
					800	800
					800	800
					800	800
					800	800
					800	800
					800	800
					800	800
					800	800
					800	800
					800	800
					1200	800
					1200	800
					1200	800
					1200	800
					1200	800
					1200	800
					1200	800
					1200	800
					1200	800
					1200	800
					1200	800
					1200	800
					1200	800
					1200	800
					1200	800
					1200	800
					1200	800
					1200	800
					1200	800
					1200	800
					1200	800
					1200	800
					1200	800
					1200	800
					1200	800
					1200	800
					1200	800
					1200	800
					1200	800
					1200	800
					1200	800
					1200	800
					1200	800
					1200	800
					1200	800
					1200	800
					1200	800
					1200	800
					1200	800
					1200	800
					1200	800
					1200	800
					1200	800
					1200	800
					1200	800
					1200	800
					1200	800
					1200	800
					1200	800
					1200	800
					1200	800
					1200	800
					1200	800
					1200	800
					1200	800
					1200	800
					1200	800
					1200	800
					1200	800
					1200	800
					1200	800
					1200	800
					1200	800
					1200	800
					1200	800
					1200	800
					1200	800
					1600	800
					1600	800
					1600	800
					1600	800
					1600	800
					1600	800
					1600	800
					1600	800
					1600	800
					1600	800
					1600	800
					1600	800
					1600	800
					1600	800
					1600	800
					1600	800
					1600	800
					1600	800
					1600	800
					1600	800
					1600	800
					1600	800
					1600	800
					1600	800
					1600	800
					1600	800
					1600	800
					1600	800
					1600	800
					1600	800
					1600	800
					1600	800
					1600	800
					1600	800
					1600	800
					1600	800
					1600	800
					1600	800
					1600	800
					1600	800
					1600	800
					1600	800
					1600	800
					1600	800
					1600	800
					1600	800
					2000	800
					2000	800
					2000	800
					2000	800
					2000	800
					2000	800
					2000	1200
					2000	1200
					2000	1200
					2000	1200
					2000	1200
					2000	1200
					2000	1200
					2000	1200
					2000	1200
					2000	1200
					2000	1200
					2000	1200
					2000	1200
					2000	1200
					2000	1200
					2000	1200
					2000	1200
					2000	1200
					2000	1200
					2000	1200
					2000	1200
					2000	1200
					2400	1200
					2400	1200
					2400	1200
					2400	1200
					2400	1200
					2400	1200
					2400	1200
					2400	1200
					2400	1200
					2400	1200
					2400	1200
					2400	1200
					2400	1200
					2400	1200
					2400	1200
					2400	1200
					2400	1200
					2400	1200
					2800	1200
					2800	1200
					2800	1200
					2800	1200
					2800	1200
					2800	1200
					2800	1200
					2800	1200
					3200	1200
					3200	1200
					3200	1200
					3200	1200
					3200	1200
					3200	1200
					3200	1200
					3200	1200
					3200	1200
					3200	1200
					3200	1200
					3200	1200
					3200	1200
					3200	1200
					3600	1200
					3600	1200
					3600	1200
					3600	1200
					3600	1200
					4000	1200
					4000	1200
					4000	1200
					4000	1200
					4000	1200
					4000	1200
					4000	1200
					4000	1200
					4000	1200
					4000	1200
					4400	1200
					4400	1200
					4400	1200
					4800	1200
					4800	1200
					4800	1200
					5200	1200
					5600	1200
					6000	1200
					6800	1200
					6800	1200
					6800	1200
					7600	1200
					11200	1200
					800	1200
					800	1200
					800	1200
					800	1200
					800	1200
					800	1200
					800	1200
					800	1200
					800	1200
					800	1200
					800	1200
					800	1200
					800	1200
					800	1200
					800	1200
					800	1200
					800	1200
					800	1200
					800	1200
					800	1200
					800	1200
					800	1200
					800	1600
					800	1600
					800	1600
					800	1600
					800	1600
					800	1600
					800	1600
					800	1600
					800	1600
					800	1600
					800	1600
					800	1600
					800	1600
					800	1600
					800	1600
					800	1600
					800	1600
					800	1600
					800	1600
					800	1600
					800	1600
					800	1600
					800	1600
					800	1600
					800	1600
					800	1600
					800	1600
					800	1600
					800	1600
					800	1600
					800	1600
					800	1600
					800	1600
					800	1600
					800	1600
					800	1600
					800	1600
					800	1600
					800	1600
					800	1600
					800	1600
					800	1600
					800	1600
					800	1600
					800	1600
					800	1600
					800	1600
					800	1600
					800	1600
					800	1600
					800	1600
					800	1600
					800	1600
					800	1600
					800	1600
					800	1600
					800	1600
					800	1600
					800	1600
					800	1600
					800	1600
					800	1600
					800	1600
					800	1600
					800	1600
					800	1600
					800	1600
					800	2000
					800	2000
					1200	2000
					1200	2000
					1200	2000
					1200	2000
					1200	2000
					1200	2000
					1200	2000
					1200	2000
					1200	2000
					1200	2000
					1200	2000
					1200	2000
					1200	2000
					1200	2000
					1200	2000
					1200	2000
					1200	2000
					1200	2000
					1200	2000
					1200	2000
					1200	2000
					1200	2000
					1200	2000
					1200	2000
					1200	2000
					1200	2000
					1200	2000
					1200	2000
					1200	2000
					1200	2000
					1200	2000
					1200	2000
					1200	2000
					1200	2000
					1200	2000
					1200	2000
					1200	2000
					1200	2400
					1200	2400
					1200	2400
					1200	2400
					1200	2400
					1200	2400
					1200	2400
					1200	2400
					1200	2400
					1600	2400
					1600	2400
					1600	2400
					1600	2400
					1600	2400
					1600	2400
					1600	2400
					1600	2400
					1600	2400
					1600	2400
					1600	2400
					1600	2400
					1600	2400
					1600	2400
					1600	2400
					1600	2800
					1600	2800
					1600	2800
					1600	2800
					1600	2800
					1600	2800
					1600	2800
					1600	2800
					1600	2800
					1600	2800
					1600	2800
					1600	2800
					1600	2800
					1600	2800
					1600	2800
					1600	2800
					1600	2800
					1600	2800
					1600	2800
					1600	3200
					2000	3200
					2000	3200
					2000	3200
					2000	3200
					2000	3200
					2000	3200
					2000	3200
					2000	3200
					2000	3200
					2000	3200
					2000	3200
					2000	3600
					2000	3600
					2000	3600
					2000	3600
					2000	3600
					2000	3600
					2000	3600
					2000	3600
					2000	3600
					2000	3600
					2000	3600
					2000	3600
					2000	3600
					2000	3600
					2000	3600
					2000	4000
					2000	4000
					2000	4000
					2000	4000
					2000	4000
					2400	4000
					2400	4000
					2400	4000
					2400	4000
					2400	4000
					2400	4400
					2400	4400
					2400	4400
					2800	4400
					2800	4400
					2800	4400
					2800	4400
					2800	4400
					2800	4400
					2800	4400
					2800	4400
					3200	4800
					3200	4800
					3200	4800
					3200	4800
					3200	4800
					3200	4800
					3200	4800
					3200	4800
					3200	5200
					3600	5200
					3600	5200
					3600	5200
					3600	5200
					3600	5200
					4000	5200
					4000	5600
					4800	5600
					4800	5600
					5600	5600
					5600	5600
					5600	5600
					6000	5600
					7600	5600
					8400	5600
					9600	6000
					10400	6000
					15200	6000
					17600	6000
					24800	6000
					25600	6000
					800	6000
					800	6400
					800	6400
					800	6400
					800	6400
					800	6400
					800	6800
					800	6800
					800	6800
					800	6800
					800	7200
					800	7200
					800	7600
					800	7600
					800	7600
					800	7600
					800	8000
					800	8000
					800	8400
					800	8400
					800	8400
					800	8400
					800	8400
					800	8800
					800	9600
					800	9600
					800	10000
					800	10000
					800	10000
					800	10800
					800	13600
					800	13600
					800	13600
					800	16000
					800	17600
					800	18800
					800	20000
					800	800
					800	800
					800	800
					800	800
					800	800
					800	800
					800	800
					800	800
					800	800
					800	800
					800	800
					800	800
					800	800
					800	800
					800	800
					800	800
					800	800
					800	800
					800	800
					800	800
					800	800
					800	800
					800	800
					800	800
					800	800
					800	800
					800	800
					800	800
					800	800
					800	800
					800	800
					800	800
					800	800
					800	800
					800	800
					800	800
					800	800
					800	800
					800	800
					800	800
					800	800
					800	800
					800	800
					800	800
					800	800
					800	800
					800	800
					800	800
					800	800
					800	800
					800	800
					800	800
					800	800
					800	800
					800	800
					800	800
					800	800
					800	800
					800	800
					800	800
					800	800
					800	800
					800	800
					800	800
					800	800
					800	800
					800	800
					800	800
					800	800
					800	800
					800	800
					800	800
					800	800
					800	800
					800	800
					800	800
					800	800
					800	800
					800	800
					800	800
					800	800
					800	800
					800	800
					800	800
					800	800
					800	800
					800	800
					800	800
					800	800
					800	800
					800	800
					800	800
					800	800
					800	800
					800	800
					800	800
					800	800
					800	800
					1200	800
					1200	800
					1200	800
					1200	800
					1200	800
					1200	800
					1200	800
					1200	800
					1200	800
					1200	800
					1200	800
					1200	800
					1200	800
					1200	800
					1200	800
					1200	800
					1200	800
					1200	800
					1200	800
					1200	800
					1200	800
					1200	800
					1200	800
					1200	800
					1200	800
					1200	800
					1200	800
					1200	800
					1200	800
					1200	800
					1200	800
					1200	800
					1200	800
					1200	800
					1200	800
					1200	800
					1200	800
					1200	800
					1200	800
					1200	800
					1200	800
					1200	800
					1200	800
					1200	800
					1200	800
					1200	800
					1200	800
					1200	800
					1200	800
					1200	800
					1200	800
					1200	800
					1200	800
					1200	800
					1200	800
					1200	800
					1200	800
					1200	800
					1200	800
					1200	800
					1200	800
					1200	800
					1200	800
					1600	800
					1600	800
					1600	800
					1600	1200
					1600	1200
					1600	1200
					1600	1200
					1600	1200
					1600	1200
					1600	1200
					1600	1200
					1600	1200
					1600	1200
					1600	1200
					1600	1200
					1600	1200
					1600	1200
					1600	1200
					1600	1200
					1600	1200
					1600	1200
					1600	1200
					1600	1200
					1600	1200
					1600	1200
					1600	1200
					1600	1200
					1600	1200
					1600	1200
					1600	1200
					1600	1200
					1600	1200
					1600	1200
					1600	1200
					1600	1200
					1600	1200
					1600	1200
					1600	1200
					1600	1200
					1600	1200
					1600	1200
					1600	1200
					1600	1200
					1600	1200
					1600	1200
					1600	1200
					1600	1200
					1600	1200
					1600	1200
					1600	1200
					1600	1200
					1600	1200
					1600	1200
					1600	1200
					1600	1200
					1600	1200
					1600	1200
					1600	1200
					1600	1200
					1600	1200
					2000	1200
					2000	1200
					2000	1200
					2000	1200
					2000	1200
					2000	1200
					2000	1200
					2000	1200
					2000	1200
					2000	1200
					2000	1200
					2000	1200
					2000	1200
					2000	1200
					2000	1200
					2000	1200
					2000	1200
					2000	1200
					2000	1200
					2000	1200
					2000	1200
					2000	1200
					2000	1200
					2000	1200
					2000	1200
					2000	1200
					2000	1200
					2000	1200
					2000	1200
					2000	1200
					2000	1200
					2000	1200
					2000	1200
					2000	1200
					2000	1200
					2000	1200
					2000	1200
					2000	1200
					2000	1200
					2000	1200
					2000	1200
					2000	1200
					2000	1200
					2000	1200
					2400	1200
					2400	1200
					2400	1200
					2400	1200
					2400	1200
					2400	1200
					2400	1200
					2400	1200
					2400	1200
					2400	1200
					2400	1200
					2400	1200
					2400	1200
					2400	1200
					2400	1200
					2400	1200
					2400	1200
					2400	1200
					2400	1200
					2400	1200
					2400	1600
					2400	1600
					2400	1600
					2400	1600
					2400	1600
					2400	1600
					2400	1600
					2400	1600
					2400	1600
					2400	1600
					2400	1600
					2400	1600
					2800	1600
					2800	1600
					2800	1600
					2800	1600
					2800	1600
					2800	1600
					2800	1600
					2800	1600
					2800	1600
					2800	1600
					2800	1600
					2800	1600
					2800	1600
					2800	1600
					2800	1600
					2800	1600
					2800	1600
					2800	1600
					2800	1600
					2800	1600
					2800	1600
					2800	1600
					2800	1600
					3200	1600
					3200	1600
					3200	1600
					3200	1600
					3200	1600
					3200	1600
					3200	1600
					3200	1600
					3200	1600
					3200	1600
					3200	1600
					3600	1600
					3600	1600
					3600	1600
					3600	1600
					3600	1600
					3600	1600
					3600	1600
					3600	1600
					3600	1600
					4000	1600
					4000	1600
					4000	1600
					4000	1600
					4000	1600
					4000	1600
					4400	1600
					4400	1600
					4800	1600
					4800	1600
					4800	1600
					5200	1600
					5200	1600
					5600	1600
					5600	1600
					6000	1600
					6400	1600
					6800	1600
					6800	1600
					6800	1600
					6800	1600
					6800	1600
					8000	1600
					8400	1600
					8400	1600
					8800	1600
					9600	1600
					10400	1600
					16400	1600
					800	1600
					800	1600
					800	1600
					800	2000
					800	2000
					800	2000
					800	2000
					800	2000
					800	2000
					800	2000
					800	2000
					800	2000
					800	2000
					800	2000
					800	2000
					800	2000
					800	2000
					800	2000
					800	2000
					800	2000
					800	2000
					800	2000
					800	2000
					800	2000
					800	2000
					800	2000
					800	2000
					800	2000
					800	2000
					800	2000
					800	2000
					800	2000
					800	2000
					800	2000
					800	2000
					800	2000
					800	2000
					800	2000
					800	2000
					800	2000
					800	2000
					800	2000
					800	2000
					800	2000
					800	2000
					800	2000
					800	2000
					800	2000
					800	2000
					800	2000
					800	2000
					800	2000
					800	2000
					800	2000
					800	2000
					800	2000
					800	2000
					800	2000
					800	2000
					800	2000
					800	2000
					800	2000
					800	2000
					800	2400
					800	2400
					800	2400
					800	2400
					800	2400
					800	2400
					800	2400
					800	2400
					800	2400
					800	2400
					800	2400
					800	2400
					800	2400
					800	2400
					800	2400
					800	2400
					800	2400
					800	2400
					800	2400
					800	2400
					800	2400
					800	2400
					800	2400
					800	2400
					800	2400
					800	2400
					800	2400
					800	2400
					800	2400
					800	2400
					800	2400
					800	2400
					800	2400
					800	2400
					800	2400
					800	2400
					800	2800
					800	2800
					800	2800
					800	2800
					800	2800
					800	2800
					800	2800
					800	2800
					800	2800
					800	2800
					800	2800
					800	2800
					800	2800
					800	2800
					800	2800
					800	2800
					800	2800
					800	2800
					800	2800
					800	2800
					800	2800
					800	2800
					800	2800
					800	2800
					800	2800
					800	2800
					1200	2800
					1200	2800
					1200	2800
					1200	2800
					1200	2800
					1200	2800
					1200	2800
					1200	3200
					1200	3200
					1200	3200
					1200	3200
					1200	3200
					1200	3200
					1200	3200
					1200	3200
					1200	3200
					1200	3200
					1200	3200
					1200	3200
					1200	3200
					1200	3200
					1200	3200
					1200	3200
					1200	3200
					1200	3200
					1200	3200
					1200	3200
					1200	3200
					1200	3600
					1200	3600
					1200	3600
					1200	3600
					1200	3600
					1200	3600
					1200	3600
					1200	3600
					1200	3600
					1200	3600
					1200	3600
					1200	3600
					1200	3600
					1200	3600
					1200	3600
					1200	4000
					1200	4000
					1200	4000
					1200	4000
					1200	4000
					1200	4000
					1200	4000
					1200	4000
					1200	4000
					1200	4000
					1200	4400
					1200	4400
					1200	4400
					1200	4400
					1200	4400
					1200	4400
					1200	4400
					1200	4400
					1200	4400
					1200	4400
					1200	4800
					1200	4800
					1200	4800
					1200	4800
					1200	5200
					1200	5600
					1600	5600
					1600	5600
					1600	5600
					1600	6000
					1600	6000
					1600	6000
					1600	6400
					1600	6400
					1600	6400
					1600	6400
					1600	6800
					1600	6800
					1600	6800
					1600	6800
					1600	7200
					1600	8400
					1600	8800
					1600	8800
					1600	9200
					1600	10000
					1600	10000
					1600	10000
					1600	10400
					1600	10400
					1600	10400
					1600	16800
					1600	18400
					1600	22000
					1600	26000
					1600	37200
					1600	40000
					1600	800
					1600	800
					1600	800
					1600	800
					1600	800
					1600	800
					1600	800
					1600	800
					1600	800
					1600	800
					1600	800
					1600	800
					1600	800
					1600	800
					1600	800
					1600	800
					1600	800
					1600	800
					1600	800
					2000	800
					2000	800
					2000	800
					2000	800
					2000	800
					2000	800
					2000	800
					2000	800
					2000	800
					2000	800
					2000	800
					2000	800
					2000	800
					2000	800
					2000	800
					2000	800
					2000	800
					2000	800
					2000	800
					2000	800
					2000	800
					2000	800
					2000	800
					2000	800
					2000	800
					2000	800
					2000	800
					2000	800
					2000	800
					2400	800
					2400	800
					2400	800
					2400	800
					2400	800
					2400	800
					2400	800
					2400	800
					2400	800
					2400	800
					2400	800
					2400	800
					2400	800
					2400	800
					2400	800
					2800	800
					2800	800
					2800	800
					2800	800
					2800	800
					2800	800
					2800	800
					3200	800
					3200	800
					3200	800
					3600	800
					3600	800
					3600	800
					3600	800
					3600	800
					3600	800
					4000	800
					4000	800
					4000	1200
					4000	1200
					4000	1200
					4000	1200
					4000	1200
					4400	1200
					4400	1200
					4400	1200
					4400	1200
					4800	1200
					4800	1200
					4800	1200
					4800	1200
					5600	1200
					5600	1200
					6800	1200
					6800	1200
					8000	1200
					8000	1200
					8400	1200
					9600	1200
					11200	1200
					23200	1200
					800	1200
					800	1200
					800	1200
					800	1200
					800	1200
					800	1200
					800	1200
					800	1200
					800	1200
					800	1200
					800	1200
					800	1200
					800	1200
					800	1200
					800	1200
					800	1200
					800	1200
					800	1200
					800	1200
					800	1200
					800	1200
					800	1200
					800	1200
					800	1200
					800	1200
					800	1200
					800	1200
					800	1200
					800	1200
					800	1200
					800	1200
					800	1200
					800	1600
					800	1600
					800	1600
					800	1600
					800	1600
					800	1600
					800	1600
					800	1600
					800	1600
					800	1600
					800	1600
					800	1600
					800	1600
					800	1600
					800	1600
					800	1600
					800	1600
					800	1600
					800	1600
					800	1600
					800	1600
					800	1600
					800	1600
					800	1600
					800	1600
					800	1600
					800	1600
					800	1600
					800	1600
					800	1600
					800	1600
					800	1600
					800	1600
					800	1600
					800	1600
					800	1600
					800	1600
					800	1600
					800	1600
					800	1600
					800	1600
					800	1600
					800	1600
					800	1600
					800	1600
					800	1600
					800	1600
					800	1600
					800	1600
					800	1600
					800	1600
					800	1600
					800	1600
					800	2000
					800	2000
					800	2000
					800	2000
					800	2000
					800	2000
					800	2000
					800	2000
					800	2000
					800	2000
					800	2000
					800	2000
					800	2000
					800	2000
					800	2000
					800	2000
					800	2000
					800	2000
					800	2000
					800	2000
					800	2000
					800	2400
					800	2400
					800	2400
					800	2400
					800	2400
					800	2400
					800	2400
					800	2400
					800	2400
					800	2400
					800	2400
					800	2400
					800	2400
					800	2400
					800	2400
					800	2400
					800	2400
					800	2400
					800	2400
					800	2400
					800	2400
					800	2400
					800	2400
					800	2400
					800	2800
					800	2800
					800	2800
					800	2800
					800	2800
					800	2800
					800	2800
					800	2800
					800	2800
					800	2800
					800	2800
					800	2800
					800	2800
					800	2800
					800	2800
					800	2800
					800	3200
					800	3200
					800	3200
					800	3200
					800	3200
					800	3200
					800	3200
					800	3200
					800	3200
					800	3200
					800	3200
					800	3600
					800	3600
					800	3600
					800	3600
					800	3600
					800	3600
					800	3600
					800	3600
					800	3600
					800	3600
					800	4000
					800	4000
					800	4000
					800	4000
					800	4800
					800	4800
					800	4800
					800	5200
					800	5200
					800	6000
					800	6800
					800	7200
					800	8400
					800	8800
					800	8800
					800	9200
					800	9600
					800	9600
					800	10000
					800	12800
					800	13600
					800	14800
					800	28400
					800	800
					800	800
					800	800
					800	800
					800	800
					800	800
					800	800
					800	800
					800	800
					800	800
					800	800
					800	800
					800	800
					800	800
					800	800
					800	800
					800	800
					800	800
					800	800
					800	800
					800	800
					800	800
					800	800
					800	800
					800	800
					800	800
					800	800
					800	800
					800	800
					800	800
					800	800
					800	800
					800	800
					800	800
					800	800
					800	800
					800	800
					800	800
					800	800
					800	800
					800	800
					800	800
					800	800
					800	800
					800	800
					800	800
					800	800
					800	800
					800	800
					800	800
					800	800
					800	800
					800	800
					800	800
					800	800
					800	800
					800	800
					800	800
					800	800
					800	800
					800	800
					800	800
					800	800
					1200	800
					1200	800
					1200	800
					1200	800
					1200	800
					1200	800
					1200	800
					1200	800
					1200	800
					1200	800
					1200	800
					1200	800
					1200	800
					1200	800
					1200	800
					1200	800
					1200	800
					1200	800
					1200	800
					1200	800
					1200	800
					1200	800
					1200	800
					1200	800
					1200	800
					1200	800
					1200	800
					1200	800
					1200	800
					1200	800
					1200	800
					1200	800
					1200	800
					1200	800
					1200	800
					1200	800
					1200	800
					1200	800
					1200	800
					1200	800
					1200	800
					1200	800
					1200	800
					1200	800
					1200	800
					1200	1200
					1200	1200
					1200	1200
					1200	1200
					1200	1200
					1200	1200
					1200	1200
					1200	1200
					1200	1200
					1200	1200
					1200	1200
					1200	1200
					1200	1200
					1200	1200
					1200	1200
					1200	1200
					1200	1200
					1200	1200
					1200	1200
					1200	1200
					1200	1200
					1200	1200
					1200	1200
					1200	1200
					1200	1200
					1200	1200
					1200	1200
					1200	1200
					1200	1200
					1200	1200
					1200	1200
					1200	1200
					1200	1200
					1200	1200
					1200	1200
					1200	1200
					1200	1200
					1200	1200
					1200	1200
					1200	1200
					1200	1200
					1200	1200
					1200	1200
					1200	1200
					1200	1200
					1200	1200
					1200	1200
					1200	1200
					1200	1200
					1200	1200
					1200	1200
					1200	1200
					1200	1200
					1200	1200
					1200	1200
					1200	1200
					1200	1200
					1200	1200
					1200	1200
					1200	1200
					1200	1200
					1200	1200
					1200	1200
					1200	1200
					1200	1200
					1600	1200
					1600	1200
					1600	1200
					1600	1200
					1600	1200
					1600	1200
					1600	1200
					1600	1600
					1600	1600
					1600	1600
					1600	1600
					1600	1600
					1600	1600
					1600	1600
					1600	1600
					1600	1600
					1600	1600
					1600	1600
					1600	1600
					1600	1600
					1600	1600
					1600	1600
					1600	1600
					1600	1600
					1600	1600
					1600	1600
					1600	1600
					1600	1600
					1600	1600
					1600	1600
					1600	1600
					1600	1600
					1600	1600
					1600	1600
					1600	1600
					1600	1600
					1600	1600
					1600	1600
					1600	1600
					1600	1600
					1600	1600
					1600	1600
					1600	1600
					1600	1600
					1600	1600
					1600	1600
					1600	1600
					1600	1600
					1600	1600
					1600	1600
					1600	1600
					1600	1600
					1600	1600
					1600	1600
					1600	1600
					1600	1600
					1600	1600
					1600	1600
					1600	1600
					1600	1600
					1600	1600
					1600	1600
					1600	1600
					1600	1600
					1600	2000
					1600	2000
					1600	2000
					1600	2000
					1600	2000
					1600	2000
					1600	2000
					1600	2000
					1600	2000
					1600	2000
					1600	2000
					1600	2000
					1600	2000
					1600	2000
					1600	2000
					1600	2000
					1600	2000
					1600	2000
					1600	2000
					1600	2000
					1600	2000
					1600	2400
					1600	2400
					1600	2400
					1600	2400
					1600	2400
					1600	2400
					1600	2400
					1600	2400
					1600	2400
					1600	2400
					1600	2400
					1600	2400
					1600	2400
					1600	2400
					1600	2400
					1600	2400
					1600	2800
					1600	2800
					1600	2800
					1600	2800
					1600	2800
					1600	2800
					1600	2800
					1600	2800
					1600	2800
					1600	2800
					1600	2800
					1600	2800
					1600	2800
					1600	3200
					1600	3200
					1600	3200
					1600	3200
					2000	3200
					2000	3200
					2000	3200
					2000	3200
					2000	3200
					2000	3200
					2000	3200
					2000	3200
					2000	3600
					2000	3600
					2000	3600
					2000	3600
					2000	3600
					2000	3600
					2000	4000
					2000	4000
					2000	4000
					2000	4400
					2000	4800
					2000	4800
					2000	4800
					2000	5600
					2000	6000
					2000	6000
					2000	6800
					2000	7200
					2000	10400
					2000	14400
					2000	14400
					2000	15200
					2000	16000
					2000	17600
					2000	17600
					2000	23200
					2000	800
					2000	800
					2000	800
					2000	800
					2000	800
					2000	800
					2000	800
					2000	800
					2000	800
					2000	800
					2000	800
					2000	800
					2000	800
					2000	800
					2000	800
					2400	800
					2400	800
					2400	800
					2400	800
					2400	800
					2400	800
					2400	800
					2400	800
					2400	800
					2400	800
					2400	800
					2400	800
					2400	800
					2400	800
					2400	800
					2400	800
					2400	800
					2400	800
					2400	800
					2400	800
					2400	800
					2400	800
					2400	800
					2400	800
					2400	800
					2400	800
					2400	800
					2400	800
					2400	800
					2400	800
					2400	800
					2400	800
					2400	800
					2400	800
					2400	800
					2400	800
					2400	800
					2400	800
					2400	800
					2400	800
					2400	800
					2400	800
					2400	800
					2400	800
					2400	800
					2400	800
					2400	800
					2400	800
					2400	800
					2400	800
					2400	800
					2400	800
					2400	800
					2400	800
					2400	800
					2400	800
					2400	800
					2400	800
					2400	800
					2400	800
					2400	800
					2400	800
					2400	800
					2400	800
					2400	800
					2400	800
					2400	800
					2400	800
					2400	800
					2400	800
					2400	800
					2400	800
					2400	800
					2400	800
					2400	800
					2400	800
					2400	800
					2400	800
					2400	800
					2400	800
					2400	800
					2400	800
					2400	800
					2400	800
					2400	800
					2400	800
					2400	800
					2400	800
					2400	800
					2400	800
					2400	800
					2400	800
					2400	800
					2800	800
					2800	800
					2800	800
					2800	800
					2800	800
					2800	800
					2800	800
					2800	800
					2800	800
					2800	800
					2800	800
					2800	800
					2800	800
					2800	800
					2800	800
					2800	800
					2800	800
					2800	800
					2800	800
					2800	800
					2800	800
					2800	800
					2800	800
					2800	800
					2800	800
					2800	800
					2800	1200
					2800	1200
					2800	1200
					2800	1200
					2800	1200
					2800	1200
					2800	1200
					2800	1200
					2800	1200
					2800	1200
					2800	1200
					2800	1200
					2800	1200
					2800	1200
					2800	1200
					2800	1200
					2800	1200
					2800	1200
					2800	1200
					2800	1200
					2800	1200
					3200	1200
					3200	1200
					3200	1200
					3200	1200
					3200	1200
					3200	1200
					3200	1200
					3200	1200
					3200	1200
					3200	1200
					3200	1200
					3200	1200
					3200	1200
					3200	1200
					3200	1200
					3200	1200
					3200	1200
					3200	1200
					3200	1200
					3200	1200
					3200	1200
					3200	1200
					3200	1200
					3200	1200
					3200	1200
					3200	1200
					3200	1200
					3200	1200
					3200	1200
					3200	1200
					3200	1200
					3200	1200
					3200	1200
					3200	1200
					3200	1200
					3200	1200
					3200	1200
					3200	1200
					3200	1200
					3600	1200
					3600	1200
					3600	1200
					3600	1200
					3600	1200
					3600	1200
					3600	1200
					3600	1200
					3600	1200
					3600	1200
					3600	1200
					3600	1200
					3600	1200
					3600	1200
					3600	1200
					3600	1200
					3600	1200
[truncated: 13,195 more rows]

## Sheet: Figure 3D
Colocalized Cluster density	Control	STIM1 smKO		Colocalized Cluster size	Individual Cluster areas (nm2)				Control	STIM1 smKO
Cell 1	0.0820922	0.173258			Control	STIM1 smKO		Number of values	1054	547
Cell 2	0.11417	0.230252			1600	800
Cell 3	0.131094	0.17082			2400	800		Minimum	800	800
Cell 4	0.107016	0.0648544			2400	800		25% Percentile	2800	2800
Cell 5	0.243908	0.137793			3200	1200		Median	6000	5600
Cell 6	0.641056	0.0677534			7600	1200		75% Percentile	13200	12800
Cell 7	0.57748	0.154024			33600	1600		Maximum	686000	120400
Cell 8	0.471719	0.306497			94800	1600
Cell 9	0.438018	0.199462			800	1600		Mean	15008	11753
Cell 10	0.198788	0.433718			800	2000		Std. Deviation	36822	16432
Cell 11	0.371616	0.251039			1200	3200		Std. Error of Mean	1134	703
Cell 12	0.446976	0.328101			1200	3200
Cell 13	0.239474	0.240376			1600	3200		Lower 95% CI	12783	10373
Cell 14	0.331978	0.197809			2000	4000		Upper 95% CI	17234	13133
Cell 15	0.555095	0.341644			3200	4400
Cell 16	0.511193	0.217683			3600	8400		Unpaired t test
Cell 17	0.280581	0.362024			4000	9600		P value	0.0492
Cell 18	0.567092	0.392055			5200	10000		Significantly different (P < 0.05)?	Yes
Cell 19	0.280431				7600	10400		One- or two-tailed P value?	Two-tailed
Cell 20	0.652139				22000	20000
					24800	28000		Mean of column A	15008
Minimum	0.08209	0.06485			31600	800		Mean of column B	11753
25% Percentile	0.209	0.1666			800	800		Difference between means (B - A) ± SEM	-3256 ± 1654
Median	0.3518	0.224			2000	1200		95% confidence interval	-6500 to -11
75% Percentile	0.5441	0.3315			2000	2000
Maximum	0.6521	0.4337			2400	2000
					2800	2800
Mean	0.3621	0.2372			3200	2800
Std. Deviation	0.1868	0.1056			3600	3600
Std. Error of Mean	0.04177	0.02488			4400	4000
					4400	4400
Lower 95% CI	0.2747	0.1847			8400	4400
Upper 95% CI	0.4495	0.2897			8800	4800
					12400	5200
Unpaired t test					15200	5600
P value	0.0172				15200	6400
Significantly different (P < 0.05)?	Yes				17600	6800
One- or two-tailed P value?	Two-tailed				20000	6800
					800	10400
Mean of column A	0.3621				1200	26000
Mean of column B	0.2372				1600	37200
Difference between means (B - A) ± SEM	-0.1249 ± 0.05000				1600	800
95% confidence interval	-0.2263 to -0.02352				2400	800
					8400	1200
					9200	1200
					51200	1600
					800	2400
					1600	3200
					1600	4800
					2000	7200
					2000	8400
					2400	8800
					2400	10000
					2800	10800
					2800	12800
					2800	1200
					3200	3200
					3200	14400
					3200	14400
					3200	17600
					3600	17600
					3600	23200
					3600	1200
					4000	1600
					4000	2400
					4400	2800
					4800	3200
					5200	3200
					5200	4000
					5600	4000
					6000	4000
					6400	4400
					6400	4800
					6400	5200
					7600	5600
					8000	6400
					8000	6800
					8400	9600
					8400	9600
					9200	10400
					9600	10800
					9600	14000
					9600	14400
					10000	28400
					10000	35200
					10000	36000
					10800	49600
					10800	86800
					11200	89600
					11200	1200
					11600	1600
					12000	1600
					14400	2800
					14400	4000
					15600	4000
					16400	4800
					16800	5600
					16800	8400
					19200	10800
					20000	20800
					23200	44400
					24800	86400
					26000	1600
					26400	2000
					31200	2800
					36400	3200
					36800	3600
					44000	4400
					64400	4800
					89600	4800
					92800	5600
					100400	5600
					107600	6000
					114800	6400
					157200	7200
					184800	7200
					800	8000
					800	10400
					1200	13200
					1200	13200
					1200	15200
					1600	17200
					1600	18400
					1600	23600
					2000	26800
					2000	28000
					2000	34800
					2000	44000
					2400	46000
					2400	48800
					2400	54400
					2400	54400
					2400	120400
					2400	800
					2800	1600
					2800	2000
					2800	2000
					3200	2000
					3200	2400
					3200	2400
					3200	2400
					3200	2400
					3200	3200
					3600	3600
					4000	4000
					4000	4000
					4000	4000
					4000	4000
					4400	4000
					4400	4400
					4400	4400
					5200	4800
					5200	5200
					5600	5600
					5600	5600
					5600	5600
					5600	5600
					5600	5600
					5600	6000
					6000	6000
					6000	6000
					6000	6800
					6000	6800
					6000	6800
					6400	6800
					6400	7200
					6400	7200
					6400	7600
					6400	8000
					6800	8000
					6800	8800
					6800	8800
					6800	9200
					6800	9200
					7200	10400
					7200	11200
					7200	11200
					7200	11200
					7200	12400
					7600	12800
					7600	14400
					7600	14800
					7600	15200
					7600	16800
					8400	16800
					8800	18800
					9200	20400
					9200	24000
					9200	26000
					9600	28000
					10000	28800
					10000	29600
					10000	30400
					10000	30400
					10400	39600
					10400	39600
					10800	42400
					10800	45200
					11200	54800
					11200	56400
					11200	60000
					11600	62400
					12000	72400
					12800	84800
					12800	85600
					12800	87200
					13200	1600
					13600	1600
					13600	2400
					13600	2400
					14000	2800
					14000	3200
					15200	3600
					15600	3600
					16400	4400
					16800	4400
					18000	4800
					18000	5200
					18400	5600
					18800	5600
					19600	7200
					20000	8000
					20000	9200
					20400	10800
					20400	11200
					20800	11600
					20800	12400
					21200	12400
					22400	12800
					22400	12800
					24400	12800
					24800	12800
					25200	13200
					25200	14000
					26000	15200
					29200	16800
					31200	19200
					33600	20000
					33600	22800
					34000	23200
					34800	24000
					35200	28000
					35600	28400
					36800	35200
					39600	38800
					41200	45200
					42000	48000
					46400	57200
					47600	60400
					56000	61200
					81200	72400
					92000	110000
					100400	2000
					102400	2400
					126400	2800
					132800	2800
					1200	3200
					1200	3200
					1200	3200
					1600	3600
					1600	4400
					1600	4400
					2000	4400
					2000	4400
					2000	4400
					2000	4800
					2000	5600
					2400	5600
					2400	6000
					2400	6400
					2400	6800
					2800	7600
					2800	9200
					3200	9600
					4000	10400
					4000	10800
					4000	10800
					4400	10800
					4400	11200
					4400	11200
					4400	11600
					4800	12000
					4800	12400
					4800	13600
					4800	15200
					5200	20400
					5200	22800
					5200	48800
					5600	800
					5600	800
					5600	1600
					6000	1600
					6000	2000
					6800	2000
					6800	2800
					7600	3200
					8000	3200
					8000	3200
					8000	3600
					9200	3600
					9600	4000
					9600	4800
					10000	5200
					10400	5200
					10400	6800
					10800	6800
					11200	7600
					11200	8000
					11200	9200
					12000	9600
					12400	10400
					12400	10800
					12800	11600
					12800	12000
					13200	14400
					13200	16000
					14000	17200
					14000	17200
					14400	27200
					14800	78000
					15200	800
					15600	800
					16000	1600
					16000	1600
					16400	1600
					17600	1600
					17600	2000
					17600	2000
					18400	2000
					18800	2400
					19200	2400
					19200	2400
					19600	2800
					20000	2800
					21200	2800
					23200	2800
					24400	3600
					25200	4000
					25600	4800
					27200	4800
					27600	4800
					28400	5600
					28400	5600
					29600	5600
					30400	5600
					31200	7200
					33600	7200
					33600	12400
					39200	12800
					42000	12800
					43200	14400
					45600	16400
					50400	30000
					52400	31200
					54800	35600
					55600	52000
					56000	800
					58000	1200
					59200	1200
					59600	1600
					60800	1600
					65600	1600
					82400	2000
					88400	2000
					90800	2000
					155600	2400
					800	2400
					800	3200
					1600	4400
					2400	4400
					2400	6000
					3200	6800
					3200	7200
					3600	7600
					4000	8800
					4000	9200
					4000	10400
					4000	12400
					5200	14400
					5200	14800
					5600	18800
					5600	22400
					5600	800
					6000	800
					6800	1600
					6800	2400
					6800	2800
					7200	3200
					7200	3200
					7600	4000
					7600	4800
					7600	6400
					7600	7600
					8400	9200
					8400	15600
					8800	17200
					10800	17600
					11600	26400
					11600	32000
					12000	38000
					14400	48400
					14800	50800
					16000	800
					16000	1200
					17600	1200
					18000	1200
					18800	1200
					19200	1200
					24000	1600
					25600	1600
					25600	1600
					26800	1600
					32400	1600
					32800	2000
					35200	2000
					35600	2400
					36800	2400
					53200	2400
					82000	2400
					89200	2800
					112800	3200
					800	3200
					800	3600
					1200	3600
					1200	5200
					1200	5200
					1600	6000
					2400	6000
					3200	6400
					3200	6800
					3600	7200
					3600	8400
					3600	11200
					4000	12800
					4000	14400
					4000	19600
					4000	23600
					4400	29200
					4400	1200
					4800	1600
					4800	1600
					4800	2400
					4800	2800
					5200	3200
					5200	3600
					5200	3600
					5200	3600
					6000	4000
					6000	4000
					6000	4000
					6000	4400
					6400	4400
					7200	5200
					7200	5600
					7200	6400
					7200	6800
					7600	6800
					8000	7600
					8400	8800
					8400	9200
					8800	9600
					8800	10400
					9200	20800
					9600	20800
					10400	1200
					10400	1200
					10800	1200
					11200	1200
					11200	1600
					12000	1600
					12000	1600
					12400	2000
					12800	2000
					12800	2400
					13200	2400
					13600	2400
					13600	2800
					13600	2800
					14000	3200
					14800	3600
					15200	3600
					15600	3600
					15600	4000
					16000	4000
					18000	4800
					18800	5600
					19200	6800
					21600	7200
					21600	8000
					22400	8400
					22800	8800
					23600	9600
					24400	12000
					24800	12800
					26000	13200
					26800	15200
					26800	15200
					28400	18000
					28400	20800
					29600	21600
					31200	33600
					34400	39200
					36000	46800
					36800	75200
					37600	800
					41200	1200
					45600	1200
					46800	1600
					49200	1600
					62000	2000
					70800	2000
					79600	2000
					80800	2000
					84800	2400
					102000	2400
					115200	2800
					140800	2800
					155200	2800
					166400	3200
					185200	3200
					234800	3600
					249200	3600
					251200	4000
					411200	4000
					439200	4000
					686000	4000
					1200	4000
					1200	4000
					1600	4000
					2400	4000
					3600	4400
					4400	4800
					4800	5200
					5200	5200
					5600	5600
					5600	6000
					6000	6000
					6000	6000
					6000	6400
					6800	8400
					7200	8800
					7200	9200
					7200	10400
					7600	12400
					7600	14400
					8000	14400
					8400	17200
					8400	24800
					8800
					9200
					9200
					9200
					10400
					10800
					10800
					10800
					11600
					12400
					12800
					12800
					13200
					14000
					14400
					16000
					16000
					17200
					19200
					20000
					23200
					32000
					36800
					37200
					38800
					48800
					53200
					60400
					73600
					800
					800
					800
					800
					800
					1200
					1200
					1200
					1200
					1200
					1200
					1200
					1600
					1600
					1600
					1600
					1600
					1600
					1600
					2000
					2000
					2400
					2400
					2800
					3200
					3200
					3200
					3200
					3600
					4400
					4800
					4800
					5200
					6000
					6000
					6800
					8800
					9200
					9600
					14800
					16400
					18400
					20400
					800
					800
					800
					1200
					1200
					1600
					1600
					1600
					1600
					1600
					1600
					2000
					2000
					2000
					2000
					2000
					2400
					2400
					2400
					2400
					2400
					2400
					2400
					2400
					2400
					2400
					2800
					2800
					3200
					3200
					3600
					3600
					4000
					4000
					4400
					4400
					4400
					4400
					4800
					4800
					4800
					5200
					5200
					5600
					5600
					6400
					6400
					7200
					8400
					8400
					9600
					9600
					10800
					11200
					14800
					18400
					22800
					800
					800
					800
					800
					1200
					1200
					1200
					2000
					2000
					2000
					2400
					2800
					2800
					2800
					3200
					4000
					4400
					4400
					5600
					6000
					8800
					10800
					11200
					13600
					22800
					33600
					800
					800
					800
					1200
					1600
					1600
					1600
					2000
					2000
					2000
					2000
					2000
					2000
					2400
					2400
					2800
					2800
					3200
					3200
					4000
					4000
					4000
					4400
					4400
					4400
					4800
					6400
					7600
					8400
					8800
					8800
					11600
					20000
					37200
					800
					800
					1200
					1200
					1200
					1200
					1200
					1200
					1200
					1600
					1600
					1600
					1600
					2000
					2000
					2000
					2000
					2000
					2400
					2400
					2400
					2400
					2400
					2400
					2800
					3200
					3200
					3200
					3200
					3600
					4000
					4000
					4000
					4400
					4400
					4400
					4400
					4400
					4800
					5600
					5600
					5600
					6800
					6800
					6800
					6800
					7200
					7600
					7600
					7600
					8800
					8800
					9600
					11200
					11600
					13200
					800
					800
					800
					800
					800
					800
					800
					800
					1200
					1200
					1200
					1600
					1600
					2000
					2000
					2000
					2000
					2000
					2000
					2400
					2800
					2800
					2800
					3600
					3600
					4000
					4000
					4400
					4400
					4400
					4400
					5200
					6000
					6000
					6400
					6400
					7200
					7600
					7600
					8000
					10800
					11200
					11600
					14000
					14800
					24800
					36800
					60800
					800
					1200
					1600
					1600
					2000
					2000
					2000
					2800
					2800
					2800
					3200
					3200
					3200
					3600
					3600
					4000
					4000
					4000
					4400
					4800
					4800
					4800
					5200
					5200
					5200
					5600
					6000
					6400
					8400
					21600
					27600
					800
					800
					800
					800
					1200
					1600
					1600
					1600
					2000
					2000
					2000
					2000
					2400
					2400
					2800
					2800
					2800
					2800
					3200
					3600
					3600
					3600
					4000
					4000
					4000
					4400
					4800
					4800
					4800
					5200
					5200
					5600
					5600
					5600
					5600
					6400
					6400
					6800
					6800
					6800
					7200
					7600
					8400
					8800
					8800
					8800
					9200
					9600
					9600
					9600
					10000
					12000
					12000
					12400
					12800
					13600
					16000
					18000
					18000
					20000
					20400
					21600
					26400
					27600
					28800
					33200
					800
					1200
					1600
					2000
					2000
					2000
					2400
					2400
					2400
					2800
					3200
					3200
					3600
					4000
					4400
					4400
					4400
					4400
					5200
					6400
					7600
					8000
					8400
					11600
					11600
					17200
					23600
					28000
					31600
					52800
					800
					800
					800
					800
					800
					1200
					1200
					1200
					1200
					1600
					1600
					1600
					1600
					1600
					1600
					1600
					2000
					2000
					2000
					2400
					2400
					2400
					2400
					2400
					2400
					2400
					2800
					2800
					2800
					2800
					2800
					2800
					2800
					2800
					2800
					2800
					3200
					3200
					3200
					3200
					3600
					3600
					3600
					3600
					3600
					4000
					4000
					4000
					4000
					4000
					4000
					4400
					4800
					5200
					5200
					5200
					5200
					5600
					5600
					5600
					6000
					6000
					6000
					6000
					6000
					6400
					6400
					6800
					7200
					8000
					8000
					8400
					8400
					9200
					10000
					10400
					10400
					10800
					11200
					13200
					13200
					16800
					18800
					21200
					24000
					32000
					45600
