# Supplementary material for: STIM1-dependent peripheral coupling governs the contractility of vascular smooth muscle cells
Source: eLife. 2022 Feb 11;11:e70278. doi: 10.7554/eLife.70278 (PMC8947769; doi:10.7554/eLife.70278)
Supplement: Figure 4—source data 1. [file elife-70278-fig4-data1.xlsx]

## Sheet: Figure 4B
TRPM4 Cluster density	Control	STIM1 smKO		TRPM4 Cluster size	Individual Cluster areas (nm2)				Control	STIM1 smKO
Cell 1	41.541	27.8389			Control	STIM1 smKO		Number of values	64292	56771
Cell 2	42.0185	27.2243			400	400
Cell 3	32.8349	38.1664			400	400		Minimum	400	400
Cell 4	39.6498	33.0441			400	400		25% Percentile	400	400
Cell 5	36.0965	38.4191			400	400		Median	800	1200
Cell 6	33.8508	55.5249			400	400		75% Percentile	2400	2000
Cell 7	44.8423	42.7122			400	400		Maximum	110000	53200
Cell 8	40.7015	38.712			400	400
Cell 9	32.4391	25.355			400	400		Mean	1911	1694
Cell 10	45.6581	36.0926			400	400		Std. Deviation	2885	2088
Cell 11	44.9736	26.5708			400	400		Std. Error of Mean	11.38	8.763
Cell 12	55.5203	54.0564			400	400
Cell 13	44.6168	45.2053			400	400		Lower 95% CI	1889	1677
Cell 14	46.1373	37.2757			400	400		Upper 95% CI	1933	1711
Cell 15	41.9234	35.5686			400	400
					400	400		Unpaired t test
Minimum	32.44	25.35			400	400		P value	<0.0001
25% Percentile	36.1	27.84			400	400		Significantly different (P < 0.05)?	Yes
Median	41.92	37.28			400	400		One- or two-tailed P value?	Two-tailed
75% Percentile	44.97	42.71			400	400
Maximum	55.52	55.52			400	400		Mean of column A	1911
					400	400		Mean of column B	1694
Mean	41.52	37.45			400	400		Difference between means (B - A) ± SEM	-216.7 ± 14.64
Std. Deviation	6.081	9.18			400	400		95% confidence interval	-245.4 to -188.0
Std. Error of Mean	1.57	2.37			400	400
					400	400
Lower 95% CI	38.15	32.37			400	400
Upper 95% CI	44.89	42.53			400	400
					400	400
Unpaired t test					400	400
P value	0.1634				400	400
Significantly different (P < 0.05)?	No				400	400
One- or two-tailed P value?	Two-tailed				400	400
					400	400
Mean of column A	41.52				400	400
Mean of column B	37.45				400	400
Difference between means (B - A) ± SEM	-4.069 ± 2.843				400	400
95% confidence interval	-9.893 to 1.755				400	400
					400	400
					400	400
					400	400
					400	400
					400	400
					400	400
					400	400
					400	400
					400	400
					400	400
					400	400
					400	400
					400	400
					400	400
					400	400
					400	400
					400	400
					400	400
					400	400
					400	400
					400	400
					400	400
					400	400
					400	400
					400	400
					400	400
					400	400
					400	400
					400	400
					400	400
					400	400
					400	400
					400	400
					400	400
					400	400
					400	400
					400	400
					400	400
					400	400
					400	400
					400	400
					400	400
					400	400
					400	400
					400	400
					400	400
					400	400
					400	400
					400	400
					400	400
					400	400
					400	400
					400	400
					400	400
					400	400
					400	400
					400	400
					400	400
					400	400
					400	400
					400	400
					400	400
					400	400
					400	400
					400	400
					400	400
					400	400
					400	400
					400	400
					400	400
					400	400
					400	400
					400	400
					400	400
					400	400
					400	400
					400	400
					400	400
					400	400
					400	400
					400	400
					400	400
					400	400
					400	400
					400	400
					400	400
					400	400
					400	400
					400	400
					400	400
					400	400
					400	400
					400	400
					400	400
					400	400
					400	400
					400	400
					400	400
					400	400
					400	400
					400	400
					400	400
					400	400
					400	400
					400	400
					400	400
					400	400
					400	400
					400	400
					400	400
					400	400
					400	400
					400	400
					400	400
					400	400
					400	400
					400	400
					400	400
					400	400
					400	400
					400	400
					400	400
					400	400
					400	400
					400	400
					400	400
					400	400
					400	400
					400	400
					400	400
					400	400
					400	400
					400	400
					400	400
					400	400
					400	400
					400	400
					400	400
					400	400
					400	400
					400	400
					400	400
					400	400
					400	400
					400	400
					400	400
					400	400
					400	400
					400	400
					400	400
					400	400
					400	400
					400	400
					400	400
					400	400
					400	400
					400	400
					400	400
					400	400
					400	400
					400	400
					400	400
					400	400
					400	400
					400	400
					400	400
					400	400
					400	400
					400	400
					400	400
					400	400
					400	400
					400	400
					400	400
					400	400
					400	400
					400	400
					400	400
					400	400
					400	400
					400	400
					400	400
					400	400
					400	400
					400	400
					400	400
					400	400
					400	400
					400	400
					400	400
					400	400
					400	400
					400	400
					400	400
					400	400
					400	400
					400	400
					400	400
					400	400
					400	400
					400	400
					400	400
					400	400
					400	400
					400	400
					400	400
					400	400
					400	400
					400	400
					400	400
					400	400
					400	400
					400	400
					400	400
					400	400
					400	400
					400	400
					400	400
					400	400
					400	400
					400	400
					400	400
					400	400
					400	400
					400	400
					400	400
					400	400
					400	400
					400	400
					400	400
					400	400
					400	400
					400	400
					400	400
					400	400
					400	400
					400	400
					400	400
					400	400
					400	400
					400	400
					400	400
					400	400
					400	400
					400	400
					400	400
					400	400
					400	400
					400	400
					400	400
					400	400
					400	400
					400	400
					400	400
					400	400
					400	400
					400	400
					400	400
					400	400
					400	400
					400	400
					400	400
					400	400
					400	400
					400	400
					400	400
					400	400
					400	400
					400	400
					400	400
					400	400
					400	400
					400	400
					400	400
					400	400
					400	400
					400	400
					400	400
					400	400
					400	400
					400	400
					400	400
					400	400
					400	400
					400	400
					400	400
					400	400
					400	400
					400	400
					400	400
					400	400
					400	400
					400	400
					400	400
					400	400
					400	400
					400	400
					400	400
					400	400
					400	400
					400	400
					400	400
					400	400
					400	400
					400	400
					400	400
					400	400
					400	400
					400	400
					400	400
					400	400
					400	400
					400	400
					400	400
					400	400
					400	400
					400	400
					400	400
					400	400
					400	400
					400	400
					400	400
					400	400
					400	400
					400	400
					400	400
					400	400
					400	400
					400	400
					400	400
					400	400
					400	400
					400	400
					400	400
					400	400
					400	400
					400	400
					400	400
					400	400
					400	400
					400	400
					400	400
					400	400
					400	400
					400	400
					400	400
					400	400
					400	400
					400	400
					400	400
					400	400
					400	400
					400	400
					400	400
					400	400
					400	400
					400	400
					400	400
					400	400
					400	400
					400	400
					400	400
					400	400
					400	400
					400	400
					400	400
					400	400
					400	400
					400	400
					400	400
					400	400
					400	400
					400	400
					400	400
					400	400
					400	400
					400	400
					400	400
					400	400
					400	400
					400	400
					400	400
					400	400
					400	400
					400	400
					400	400
					400	400
					400	400
					400	400
					400	400
					400	400
					400	400
					400	400
					400	400
					400	400
					400	400
					400	400
					400	400
					400	400
					400	400
					400	400
					400	400
					400	400
					400	400
					400	400
					400	400
					400	400
					400	400
					400	400
					400	400
					400	400
					400	400
					400	400
					400	400
					400	400
					400	400
					400	400
					400	400
					400	400
					400	400
					400	400
					400	400
					400	400
					400	400
					400	400
					400	400
					400	400
					400	400
					400	400
					400	400
					400	400
					400	400
					400	400
					400	400
					400	400
					400	400
					400	400
					400	400
					400	400
					400	400
					400	400
					400	400
					400	400
					400	400
					400	400
					400	400
					400	400
					400	400
					400	400
					400	400
					400	400
					400	400
					400	400
					400	400
					400	400
					400	400
					400	400
					400	400
					400	400
					400	400
					400	400
					400	400
					400	400
					400	400
					400	400
					400	400
					400	400
					400	400
					400	400
					400	400
					400	400
					400	400
					400	400
					400	400
					400	400
					400	400
					400	400
					400	400
					400	400
					400	400
					400	400
					400	400
					400	400
					400	400
					400	400
					400	400
					400	400
					400	400
					400	400
					400	400
					400	400
					400	400
					400	400
					400	400
					400	400
					400	400
					400	400
					400	400
					400	400
					400	400
					400	400
					400	400
					400	400
					400	400
					400	400
					400	400
					400	400
					400	400
					400	400
					400	400
					400	400
					400	400
					400	400
					400	400
					400	400
					400	400
					400	400
					400	400
					400	400
					400	400
					400	400
					400	400
					400	400
					400	400
					400	400
					400	400
					400	400
					400	400
					400	400
					400	400
					400	400
					400	400
					400	400
					400	400
					400	400
					400	400
					400	400
					400	400
					400	400
					400	400
					400	400
					400	400
					400	400
					400	400
					400	400
					400	400
					400	400
					400	400
					400	400
					400	400
					400	400
					400	400
					400	400
					400	400
					400	400
					400	400
					400	400
					400	400
					400	400
					400	400
					400	400
					400	400
					400	400
					400	400
					400	400
					400	400
					400	400
					400	400
					400	400
					400	400
					400	400
					400	400
					400	400
					400	400
					400	400
					400	400
					400	400
					400	400
					400	400
					400	400
					400	400
					400	400
					400	400
					400	400
					400	400
					400	400
					400	400
					400	400
					400	400
					400	400
					400	400
					400	400
					400	400
					400	400
					400	400
					400	400
					400	400
					400	400
					400	400
					400	400
					400	400
					400	400
					400	400
					400	400
					400	400
					400	400
					400	400
					400	400
					400	400
					400	400
					400	400
					400	400
					400	400
					400	400
					400	400
					400	400
					400	400
					400	400
					400	400
					400	400
					400	400
					400	400
					400	400
					400	400
					400	400
					400	400
					400	400
					400	400
					400	400
					400	400
					400	400
					400	400
					400	400
					400	400
					400	400
					400	400
					400	400
					400	400
					400	400
					400	400
					400	400
					400	400
					400	400
					400	400
					400	400
					400	400
					400	400
					400	400
					400	400
					400	400
					400	400
					400	400
					400	400
					400	400
					400	400
					400	400
					400	400
					400	400
					400	400
					400	400
					400	400
					400	400
					400	400
					400	400
					400	400
					400	400
					400	400
					400	400
					400	400
					400	400
					400	400
					400	400
					400	400
					400	400
					400	400
					400	400
					400	400
					400	400
					400	400
					400	400
					400	400
					400	400
					400	400
					400	400
					400	400
					400	400
					400	400
					400	400
					400	400
					400	400
					400	400
					400	400
					400	400
					400	400
					400	400
					400	400
					400	400
					400	400
					400	400
					400	400
					400	400
					400	400
					400	400
					400	400
					400	400
					400	400
					400	400
					400	400
					400	400
					400	400
					400	400
					400	400
					400	400
					400	400
					400	400
					400	400
					400	400
					400	400
					400	400
					400	400
					400	400
					400	400
					400	400
					400	400
					400	400
					400	400
					400	400
					400	400
					400	400
					400	400
					400	400
					400	400
					400	400
					400	400
					400	400
					400	400
					400	400
					400	400
					400	400
					400	400
					400	400
					400	400
					400	400
					400	400
					400	400
					400	400
					400	400
					400	400
					400	400
					400	400
					400	400
					400	400
					400	400
					400	400
					400	400
					400	400
					400	400
					400	400
					400	400
					400	400
					400	400
					400	400
					400	400
					400	400
					400	400
					400	400
					400	400
					400	400
					400	400
					400	400
					400	400
					400	400
					400	400
					400	400
					400	400
					400	400
					400	400
					400	400
					400	400
					400	400
					400	400
					400	400
					400	400
					400	400
					400	400
					400	400
					400	400
					400	400
					400	400
					400	400
					400	400
					400	400
					400	400
					400	400
					400	400
					400	400
					400	400
					400	400
					400	400
					400	400
					400	400
					400	400
					400	400
					400	400
					400	400
					400	400
					400	400
					400	400
					400	400
					400	400
					400	400
					400	400
					400	400
					400	400
					400	400
					400	400
					400	400
					800	400
					800	400
					800	400
					800	400
					800	400
					800	400
					800	400
					800	400
					800	400
					800	400
					800	400
					800	400
					800	400
					800	400
					800	400
					800	400
					800	400
					800	400
					800	400
					800	400
					800	400
					800	400
					800	400
					800	400
					800	400
					800	400
					800	400
					800	400
					800	400
					800	400
					800	400
					800	400
					800	400
					800	400
					800	400
					800	400
					800	400
					800	400
					800	400
					800	400
					800	400
					800	400
					800	400
					800	400
					800	400
					800	400
					800	400
					800	400
					800	400
					800	400
					800	400
					800	400
					800	400
					800	400
					800	400
					800	400
					800	400
					800	400
					800	400
					800	400
					800	400
					800	400
					800	400
					800	400
					800	400
					800	400
					800	400
					800	400
					800	400
					800	400
					800	400
					800	400
					800	400
					800	400
					800	400
					800	400
					800	400
					800	400
					800	400
					800	400
					800	400
					800	400
					800	400
					800	400
					800	400
					800	400
					800	400
					800	400
					800	400
					800	400
					800	400
					800	400
					800	400
					800	400
					800	800
					800	800
					800	800
					800	800
					800	800
					800	800
					800	800
					800	800
					800	800
					800	800
					800	800
					800	800
					800	800
					800	800
					800	800
					800	800
					800	800
					800	800
					800	800
					800	800
					800	800
					800	800
					800	800
					800	800
					800	800
					800	800
					800	800
					800	800
					800	800
					800	800
					800	800
					800	800
					800	800
					800	800
					800	800
					800	800
					800	800
					800	800
					800	800
					800	800
					800	800
					800	800
					800	800
					800	800
					800	800
					800	800
					800	800
					800	800
					800	800
					800	800
					800	800
					800	800
					800	800
					800	800
					800	800
					800	800
					800	800
					800	800
					800	800
					800	800
					800	800
					800	800
					800	800
					800	800
					800	800
					800	800
					800	800
					800	800
					800	800
					800	800
					800	800
					800	800
					800	800
					800	800
					800	800
					800	800
					800	800
					800	800
					800	800
					800	800
					800	800
					800	800
					800	800
					800	800
					800	800
					800	800
					800	800
					800	800
					800	800
					800	800
					800	800
					800	800
					800	800
					800	800
					800	800
					800	800
					800	800
					800	800
					800	800
					800	800
					800	800
					800	800
					800	800
					800	800
					800	800
					800	800
					800	800
					800	800
					800	800
					800	800
					800	800
					800	800
					800	800
					800	800
					800	800
					800	800
					800	800
					800	800
					800	800
					800	800
					800	800
					800	800
					800	800
					800	800
					800	800
					800	800
					800	800
					800	800
					800	800
					800	800
					800	800
					800	800
					800	800
					800	800
					800	800
					800	800
					800	800
					800	800
					800	800
					800	800
					800	800
					800	800
					800	800
					800	800
					800	800
					800	800
					800	800
					800	800
					800	800
					800	800
					800	800
					800	800
					800	800
					800	800
					800	800
					800	800
					800	800
					800	800
					800	800
					800	800
					800	800
					800	800
					800	800
					800	800
					800	800
					800	800
					800	800
					800	800
					800	800
					800	800
					800	800
					800	800
					800	800
					800	800
					800	800
					800	800
					800	800
					800	800
					800	800
					800	800
					800	800
					800	800
					800	800
					800	800
					800	800
					800	800
					800	800
					800	800
					800	800
					800	800
					800	800
					800	800
					800	800
					800	800
					800	800
					800	800
					800	800
					800	800
					800	800
					800	800
					800	800
					800	800
					800	800
					800	800
					800	800
					800	800
					800	800
					800	800
					800	800
					800	800
					800	800
					800	800
					800	800
					800	800
					800	800
					800	800
					800	800
					800	800
					800	800
					800	800
					800	800
					800	800
					800	800
					800	800
					800	800
					800	800
					800	800
					800	800
					800	800
					800	800
					800	800
					800	800
					800	800
					800	800
					800	800
					800	800
					800	800
					800	800
					800	800
					800	800
					800	800
					800	800
					800	800
					800	800
					800	800
					800	800
					800	800
					800	800
					800	800
					800	800
					800	800
					800	800
					800	800
					800	800
					800	800
					800	800
					800	800
					800	800
					800	800
					800	800
					800	800
					800	800
					800	800
					800	800
					800	800
					800	800
					800	800
					800	800
					800	800
					800	800
					800	800
					800	800
					800	800
					800	800
					800	800
					800	800
					800	800
					800	800
					800	800
					800	800
					800	800
					800	800
					800	800
					800	800
					800	800
					800	800
					800	800
					800	800
					800	800
					800	800
					800	800
					800	800
					800	800
					800	800
					800	800
					800	800
					800	800
					800	800
					800	800
					800	800
					800	800
					800	800
					800	800
					800	800
					800	800
					800	800
					800	800
					800	800
					800	800
					800	800
					800	800
					800	800
					800	800
					800	800
					800	800
					800	800
					800	800
					800	800
					800	800
					800	800
					800	800
					800	800
					800	800
					800	800
					800	800
					800	800
					800	800
					800	800
					800	800
					800	800
					800	800
					800	800
					800	800
					800	800
					800	800
					800	800
					800	800
					800	800
					800	800
					800	800
					800	800
					800	800
					800	800
					800	800
					800	800
					800	800
					800	800
					800	800
					800	800
					800	800
					800	800
					800	800
					800	800
					800	800
					800	800
					800	800
					800	800
					800	800
					800	800
					1200	800
					1200	800
					1200	800
					1200	800
					1200	800
					1200	800
					1200	800
					1200	800
					1200	800
					1200	800
					1200	800
					1200	800
					1200	800
					1200	800
					1200	800
					1200	800
					1200	800
					1200	800
					1200	800
					1200	800
					1200	800
					1200	800
					1200	800
					1200	800
					1200	800
					1200	800
					1200	800
					1200	800
					1200	800
					1200	800
					1200	800
					1200	800
					1200	800
					1200	800
					1200	800
					1200	800
					1200	800
					1200	800
					1200	800
					1200	800
					1200	800
					1200	800
					1200	800
					1200	800
					1200	800
					1200	800
					1200	800
					1200	800
					1200	800
					1200	800
					1200	800
					1200	800
					1200	800
					1200	800
					1200	800
					1200	800
					1200	800
					1200	800
					1200	800
					1200	800
					1200	800
					1200	800
					1200	800
					1200	800
					1200	800
					1200	800
					1200	800
					1200	800
					1200	800
					1200	800
					1200	800
					1200	800
					1200	800
					1200	800
					1200	800
					1200	800
					1200	800
					1200	800
					1200	800
					1200	800
					1200	800
					1200	800
					1200	800
					1200	800
					1200	800
					1200	800
					1200	800
					1200	800
					1200	800
					1200	800
					1200	800
					1200	800
					1200	800
					1200	800
					1200	800
					1200	800
					1200	800
					1200	800
					1200	800
					1200	800
					1200	800
					1200	800
					1200	800
					1200	800
					1200	800
					1200	800
					1200	800
					1200	800
					1200	800
					1200	800
					1200	800
					1200	800
					1200	800
					1200	800
					1200	800
					1200	800
					1200	800
					1200	800
					1200	800
					1200	800
					1200	800
					1200	800
					1200	800
					1200	800
					1200	800
					1200	800
					1200	800
					1200	800
					1200	800
					1200	800
					1200	800
					1200	800
					1200	800
					1200	800
					1200	800
					1200	800
					1200	800
					1200	800
					1200	800
					1200	800
					1200	800
					1200	800
					1200	800
					1200	800
					1200	800
					1200	800
					1200	800
					1200	800
					1200	800
					1200	800
					1200	800
					1200	800
					1200	800
					1200	800
					1200	800
					1200	800
					1200	800
					1200	800
					1200	800
					1200	800
					1200	800
					1200	800
					1200	800
					1200	800
					1200	800
					1200	800
					1200	800
					1200	800
					1200	1200
					1200	1200
					1200	1200
					1200	1200
					1200	1200
					1200	1200
					1200	1200
					1200	1200
					1200	1200
					1200	1200
					1200	1200
					1200	1200
					1200	1200
					1200	1200
					1200	1200
					1200	1200
					1200	1200
					1200	1200
					1200	1200
					1200	1200
					1200	1200
					1200	1200
					1200	1200
					1200	1200
					1200	1200
					1200	1200
					1200	1200
					1200	1200
					1200	1200
					1200	1200
					1200	1200
					1200	1200
					1200	1200
					1200	1200
					1200	1200
					1200	1200
					1200	1200
					1200	1200
					1200	1200
					1200	1200
					1200	1200
					1200	1200
					1200	1200
					1200	1200
					1200	1200
					1200	1200
					1200	1200
					1200	1200
					1200	1200
					1200	1200
					1200	1200
					1200	1200
					1200	1200
					1200	1200
					1200	1200
					1200	1200
					1200	1200
					1200	1200
					1200	1200
					1200	1200
					1200	1200
					1200	1200
					1200	1200
					1200	1200
					1200	1200
					1200	1200
					1200	1200
					1200	1200
					1200	1200
					1200	1200
					1200	1200
					1200	1200
					1200	1200
					1200	1200
					1200	1200
					1200	1200
					1200	1200
					1200	1200
					1200	1200
					1200	1200
					1200	1200
					1200	1200
					1200	1200
					1200	1200
					1200	1200
					1200	1200
					1200	1200
					1200	1200
					1200	1200
					1200	1200
					1200	1200
					1200	1200
					1200	1200
					1200	1200
					1200	1200
					1200	1200
					1200	1200
					1200	1200
					1200	1200
					1200	1200
					1200	1200
					1200	1200
					1200	1200
					1200	1200
					1200	1200
					1200	1200
					1200	1200
					1200	1200
					1200	1200
					1200	1200
					1200	1200
					1200	1200
					1200	1200
					1200	1200
					1200	1200
					1200	1200
					1200	1200
					1200	1200
					1200	1200
					1200	1200
					1600	1200
					1600	1200
					1600	1200
					1600	1200
					1600	1200
					1600	1200
					1600	1200
					1600	1200
					1600	1200
					1600	1200
					1600	1200
					1600	1200
					1600	1200
					1600	1200
					1600	1200
					1600	1200
					1600	1200
					1600	1200
					1600	1200
					1600	1200
					1600	1200
					1600	1200
					1600	1200
					1600	1200
					1600	1200
					1600	1200
					1600	1200
					1600	1200
					1600	1200
					1600	1200
					1600	1200
					1600	1200
					1600	1200
					1600	1200
					1600	1200
					1600	1200
					1600	1200
					1600	1200
					1600	1200
					1600	1200
					1600	1200
					1600	1200
					1600	1200
					1600	1200
					1600	1200
					1600	1200
					1600	1200
					1600	1200
					1600	1200
					1600	1200
					1600	1200
					1600	1200
					1600	1200
					1600	1200
					1600	1200
					1600	1200
					1600	1200
					1600	1200
					1600	1200
					1600	1200
					1600	1200
					1600	1200
					1600	1200
					1600	1200
					1600	1200
					1600	1200
					1600	1200
					1600	1200
					1600	1200
					1600	1200
					1600	1200
					1600	1200
					1600	1200
					1600	1200
					1600	1200
					1600	1200
					1600	1200
					1600	1200
					1600	1200
					1600	1200
					1600	1200
					1600	1200
					1600	1200
					1600	1200
					1600	1200
					1600	1200
					1600	1200
					1600	1200
					1600	1200
					1600	1200
					1600	1200
					1600	1200
					1600	1200
					1600	1200
					1600	1200
					1600	1200
					1600	1200
					1600	1200
					1600	1200
					1600	1200
					1600	1200
					1600	1200
					1600	1200
					1600	1200
					1600	1200
					1600	1200
					1600	1200
					1600	1200
					1600	1200
					1600	1200
					1600	1200
					1600	1200
					1600	1200
					1600	1200
					1600	1200
					1600	1200
					1600	1200
					1600	1200
					1600	1200
					1600	1200
					1600	1200
					1600	1200
					1600	1200
					1600	1200
					1600	1200
					1600	1200
					1600	1200
					1600	1200
					1600	1200
					1600	1200
					1600	1200
					1600	1200
					1600	1200
					1600	1200
					1600	1200
					1600	1200
					1600	1200
					1600	1200
					1600	1200
					1600	1200
					1600	1200
					1600	1200
					1600	1200
					1600	1200
					1600	1200
					1600	1200
					1600	1200
					1600	1200
					1600	1200
					1600	1200
					1600	1200
					1600	1200
					1600	1200
					1600	1200
					1600	1200
					1600	1200
					1600	1200
					1600	1200
					1600	1200
					1600	1200
					1600	1200
					1600	1200
					1600	1200
					1600	1200
					1600	1200
					1600	1200
					1600	1200
					1600	1200
					1600	1200
					1600	1200
					1600	1200
					1600	1200
					1600	1200
					1600	1200
					1600	1200
					1600	1200
					1600	1200
					1600	1200
					1600	1200
					1600	1200
					1600	1200
					1600	1200
					1600	1200
					1600	1200
					1600	1200
					1600	1200
					1600	1200
					1600	1200
					1600	1200
					1600	1200
					1600	1200
					1600	1200
					1600	1200
					1600	1200
					1600	1200
					1600	1200
					1600	1200
					1600	1200
					1600	1200
					1600	1200
					1600	1200
					1600	1200
					1600	1200
					1600	1200
					1600	1200
					1600	1200
					1600	1200
					1600	1200
					1600	1200
					1600	1200
					1600	1200
					1600	1200
					1600	1200
					1600	1200
					1600	1200
					1600	1200
					1600	1200
					1600	1200
					1600	1200
					1600	1200
					1600	1200
					1600	1200
					1600	1200
					1600	1200
					1600	1200
					1600	1200
					1600	1200
					1600	1200
					1600	1200
					1600	1200
					1600	1200
					1600	1200
					1600	1200
					1600	1200
					1600	1200
					1600	1200
					1600	1200
					1600	1200
					1600	1200
					1600	1200
					1600	1200
					1600	1200
					1600	1200
					1600	1200
					1600	1200
					1600	1200
					1600	1200
					1600	1200
					1600	1200
					1600	1200
					1600	1200
					1600	1200
					1600	1200
					2000	1200
					2000	1200
					2000	1200
					2000	1200
					2000	1200
					2000	1200
					2000	1200
					2000	1200
					2000	1200
					2000	1200
					2000	1200
					2000	1200
					2000	1200
					2000	1200
					2000	1200
					2000	1200
					2000	1200
					2000	1200
					2000	1200
					2000	1200
					2000	1200
					2000	1200
					2000	1200
					2000	1200
					2000	1200
					2000	1200
					2000	1200
					2000	1200
					2000	1200
					2000	1200
					2000	1200
					2000	1200
					2000	1200
					2000	1200
					2000	1200
					2000	1200
					2000	1200
					2000	1200
					2000	1200
					2000	1200
					2000	1200
					2000	1200
					2000	1200
					2000	1200
					2000	1200
					2000	1200
					2000	1200
					2000	1200
					2000	1200
					2000	1200
					2000	1200
					2000	1200
					2000	1200
					2000	1600
					2000	1600
					2000	1600
					2000	1600
					2000	1600
					2000	1600
					2000	1600
					2000	1600
					2000	1600
					2000	1600
					2000	1600
					2000	1600
					2000	1600
					2000	1600
					2000	1600
					2000	1600
					2000	1600
					2000	1600
					2000	1600
					2000	1600
					2000	1600
					2000	1600
					2000	1600
					2000	1600
					2000	1600
					2000	1600
					2000	1600
					2000	1600
					2000	1600
					2000	1600
					2000	1600
					2000	1600
					2000	1600
					2000	1600
					2000	1600
					2000	1600
					2000	1600
					2000	1600
					2000	1600
					2000	1600
					2000	1600
					2000	1600
					2000	1600
					2000	1600
					2000	1600
					2000	1600
					2000	1600
					2000	1600
					2000	1600
					2000	1600
					2000	1600
					2000	1600
					2000	1600
					2000	1600
					2000	1600
					2000	1600
					2000	1600
					2000	1600
					2000	1600
					2000	1600
					2000	1600
					2000	1600
					2000	1600
					2000	1600
					2000	1600
					2000	1600
					2000	1600
					2000	1600
					2000	1600
					2000	1600
					2000	1600
					2000	1600
					2000	1600
					2000	1600
					2000	1600
					2000	1600
					2000	1600
					2000	1600
					2000	1600
					2000	1600
					2000	1600
					2000	1600
					2000	1600
					2000	1600
					2000	1600
					2000	1600
					2000	1600
					2000	1600
					2000	1600
					2000	1600
					2000	1600
					2000	1600
					2000	1600
					2000	1600
					2000	1600
					2000	1600
					2000	1600
[truncated: 62,294 more rows]

## Sheet: Figure 4C
IP3R Cluster density	Control	STIM1 smKO		IP3R Cluster size	Individual Cluster areas (nm2)				Control	STIM1 smKO
Cell 1	30.8838	28.7308			Control	STIM1 smKO		Number of values	51728	45717
Cell 2	36.2191	29.7192			400	400
Cell 3	36.447	34.8434			400	400		Minimum	400	400
Cell 4	34.3294	34.6007			400	400		25% Percentile	400	400
Cell 5	34.1537	35.8268			400	400		Median	800	800
Cell 6	30.4686	45.9383			400	400		75% Percentile	2000	1600
Cell 7	37.5342	16.4353			400	400		Maximum	130000	71600
Cell 8	31.5476	25.9051			400	400
Cell 9	21.5921	17.2744			400	400		Mean	1705	1414
Cell 10	34.6764	31.0528			400	400		Std. Deviation	3144	2092
Cell 11	37.1442	18.0047			400	400		Std. Error of Mean	13.82	9.783
Cell 12	40.5465	43.9698			400	400
Cell 13	28.9943	35.4006			400	400		Lower 95% CI	1678	1395
Cell 14	33.6255	36.2129			400	400		Upper 95% CI	1733	1433
Cell 15	31.1235	25.1814			400	400
					400	400		Unpaired t test
Minimum	21.59	16.44			400	400		P value	<0.0001
25% Percentile	30.88	25.18			400	400		Significantly different (P < 0.05)?	Yes
Median	34.15	31.05			400	400		One- or two-tailed P value?	Two-tailed
75% Percentile	36.45	35.83			400	400
Maximum	40.55	45.94			400	400		Mean of column A	1705
					400	400		Mean of column B	1414
Mean	33.29	30.61			400	400		Difference between means (B - A) ± SEM	-291.1 ± 17.34
Std. Deviation	4.51	8.955			400	400		95% confidence interval	-325.1 to -257.1
Std. Error of Mean	1.164	2.312			400	400
					400	400
Lower 95% CI	30.79	25.65			400	400
Upper 95% CI	35.78	35.57			400	400
					400	400
Unpaired t test					400	400
P value	0.3095				400	400
Significantly different (P < 0.05)?	No				400	400
One- or two-tailed P value?	Two-tailed				400	400
					400	400
Mean of column A	33.29				400	400
Mean of column B	30.61				400	400
Difference between means (B - A) ± SEM	-2.679 ± 2.589				400	400
95% confidence interval	-7.982 to 2.623				400	400
					400	400
					400	400
					400	400
					400	400
					400	400
					400	400
					400	400
					400	400
					400	400
					400	400
					400	400
					400	400
					400	400
					400	400
					400	400
					400	400
					400	400
					400	400
					400	400
					400	400
					400	400
					400	400
					400	400
					400	400
					400	400
					400	400
					400	400
					400	400
					400	400
					400	400
					400	400
					400	400
					400	400
					400	400
					400	400
					400	400
					400	400
					400	400
					400	400
					400	400
					400	400
					400	400
					400	400
					400	400
					400	400
					400	400
					400	400
					400	400
					400	400
					400	400
					400	400
					400	400
					400	400
					400	400
					400	400
					400	400
					400	400
					400	400
					400	400
					400	400
					400	400
					400	400
					400	400
					400	400
					400	400
					400	400
					400	400
					400	400
					400	400
					400	400
					400	400
					400	400
					400	400
					400	400
					400	400
					400	400
					400	400
					400	400
					400	400
					400	400
					400	400
					400	400
					400	400
					400	400
					400	400
					400	400
					400	400
					400	400
					400	400
					400	400
					400	400
					400	400
					400	400
					400	400
					400	400
					400	400
					400	400
					400	400
					400	400
					400	400
					400	400
					400	400
					400	400
					400	400
					400	400
					400	400
					400	400
					400	400
					400	400
					400	400
					400	400
					400	400
					400	400
					400	400
					400	400
					400	400
					400	400
					400	400
					400	400
					400	400
					400	400
					400	400
					400	400
					400	400
					400	400
					400	400
					400	400
					400	400
					400	400
					400	400
					400	400
					400	400
					400	400
					400	400
					400	400
					400	400
					400	400
					400	400
					400	400
					400	400
					400	400
					400	400
					400	400
					400	400
					400	400
					400	400
					400	400
					400	400
					400	400
					400	400
					400	400
					400	400
					400	400
					400	400
					400	400
					400	400
					400	400
					400	400
					400	400
					400	400
					400	400
					400	400
					400	400
					400	400
					400	400
					400	400
					400	400
					400	400
					400	400
					400	400
					400	400
					400	400
					400	400
					400	400
					400	400
					400	400
					400	400
					400	400
					400	400
					400	400
					400	400
					400	400
					400	400
					400	400
					400	400
					400	400
					400	400
					400	400
					400	400
					400	400
					400	400
					400	400
					400	400
					400	400
					400	400
					400	400
					400	400
					400	400
					400	400
					400	400
					400	400
					400	400
					400	400
					400	400
					400	400
					400	400
					400	400
					400	400
					400	400
					400	400
					400	400
					400	400
					400	400
					400	400
					400	400
					400	400
					400	400
					400	400
					400	400
					400	400
					400	400
					400	400
					400	400
					400	400
					400	400
					400	400
					400	400
					400	400
					400	400
					400	400
					400	400
					400	400
					400	400
					400	400
					400	400
					400	400
					400	400
					400	400
					400	400
					400	400
					400	400
					400	400
					400	400
					400	400
					400	400
					400	400
					400	400
					400	400
					400	400
					400	400
					400	400
					400	400
					400	400
					400	400
					400	400
					400	400
					400	400
					400	400
					400	400
					400	400
					400	400
					400	400
					400	400
					400	400
					400	400
					400	400
					400	400
					400	400
					400	400
					400	400
					400	400
					400	400
					400	400
					400	400
					400	400
					400	400
					400	400
					400	400
					400	400
					400	400
					400	400
					400	400
					400	400
					400	400
					400	400
					400	400
					400	400
					400	400
					400	400
					400	400
					400	400
					400	400
					400	400
					400	400
					400	400
					400	400
					400	400
					400	400
					400	400
					400	400
					400	400
					400	400
					400	400
					400	400
					400	400
					400	400
					400	400
					400	400
					400	400
					400	400
					400	400
					400	400
					400	400
					400	400
					400	400
					400	400
					400	400
					400	400
					400	400
					400	400
					400	400
					400	400
					400	400
					400	400
					400	400
					400	400
					400	400
					400	400
					400	400
					400	400
					400	400
					400	400
					400	400
					400	400
					400	400
					400	400
					400	400
					400	400
					400	400
					400	400
					400	400
					400	400
					400	400
					400	400
					400	400
					400	400
					400	400
					400	400
					400	400
					400	400
					400	400
					400	400
					400	400
					400	400
					400	400
					400	400
					400	400
					400	400
					400	400
					400	400
					400	400
					400	400
					400	400
					400	400
					400	400
					400	400
					400	400
					400	400
					400	400
					400	400
					400	400
					400	400
					400	400
					400	400
					400	400
					400	400
					400	400
					400	400
					400	400
					400	400
					400	400
					400	400
					400	400
					400	400
					400	400
					400	400
					400	400
					400	400
					400	400
					400	400
					400	400
					400	400
					400	400
					400	400
					400	400
					400	400
					400	400
					400	400
					400	400
					400	400
					400	400
					400	400
					400	400
					400	400
					400	400
					400	400
					400	400
					400	400
					400	400
					400	400
					400	400
					400	400
					400	400
					400	400
					400	400
					400	400
					400	400
					400	400
					400	400
					400	400
					400	400
					400	400
					400	400
					400	400
					400	400
					400	400
					400	400
					400	400
					400	400
					400	400
					400	400
					400	400
					400	400
					400	400
					400	400
					400	400
					400	400
					400	400
					400	400
					400	400
					400	400
					400	400
					400	400
					400	400
					400	400
					400	400
					400	400
					400	400
					400	400
					400	400
					400	400
					400	400
					400	400
					400	400
					400	400
					400	400
					400	400
					400	400
					400	400
					400	400
					400	400
					400	400
					400	400
					400	400
					400	400
					400	400
					400	400
					400	400
					400	400
					400	400
					400	400
					400	400
					400	400
					400	400
					400	400
					400	400
					400	400
					400	400
					400	400
					400	400
					400	400
					400	400
					400	400
					400	400
					400	400
					400	400
					400	400
					400	400
					400	400
					400	400
					400	400
					400	400
					400	400
					400	400
					400	400
					400	400
					400	400
					400	400
					400	400
					400	400
					400	400
					400	400
					400	400
					400	400
					400	400
					400	400
					400	400
					400	400
					400	400
					400	400
					400	400
					400	400
					400	400
					400	400
					400	400
					400	400
					400	400
					400	400
					400	400
					400	400
					400	400
					400	400
					400	400
					400	400
					400	400
					400	400
					400	400
					400	400
					400	400
					400	400
					400	400
					400	400
					400	400
					400	400
					400	400
					400	400
					400	400
					400	400
					400	400
					400	400
					400	400
					400	400
					400	400
					400	400
					400	400
					400	400
					400	400
					400	400
					400	400
					400	400
					400	400
					400	400
					400	400
					400	400
					400	400
					400	400
					400	400
					400	400
					400	400
					400	400
					400	400
					400	400
					400	400
					400	400
					400	400
					400	400
					400	400
					400	400
					400	400
					400	400
					400	400
					400	400
					400	400
					400	400
					400	400
					400	400
					400	400
					400	400
					400	400
					400	400
					400	400
					400	400
					400	400
					400	400
					400	400
					400	400
					400	400
					400	400
					400	400
					400	400
					400	400
					400	400
					400	400
					400	400
					400	400
					400	400
					400	400
					400	400
					400	400
					400	400
					400	400
					400	400
					400	400
					400	400
					400	400
					400	400
					400	400
					400	400
					400	400
					400	400
					400	400
					400	400
					400	400
					400	400
					400	400
					400	400
					400	400
					400	400
					400	400
					400	400
					400	400
					400	400
					400	400
					400	400
					400	400
					400	400
					400	400
					400	400
					400	400
					400	400
					400	400
					400	400
					400	400
					400	400
					400	400
					400	400
					400	400
					400	400
					400	400
					400	400
					400	400
					400	400
					400	400
					400	400
					400	400
					400	400
					400	400
					400	400
					400	400
					400	400
					400	400
					400	400
					400	400
					400	400
					400	400
					400	400
					400	400
					400	400
					400	400
					400	400
					400	400
					400	400
					400	400
					400	400
					400	400
					400	400
					400	400
					400	400
					400	400
					400	400
					400	400
					400	400
					400	400
					400	400
					400	400
					400	400
					400	400
					400	400
					400	400
					400	400
					400	400
					400	400
					400	400
					400	400
					400	400
					400	400
					400	400
					400	400
					400	400
					400	400
					400	400
					400	400
					400	400
					400	400
					400	400
					400	400
					400	400
					400	400
					400	400
					400	400
					400	400
					400	400
					400	400
					400	400
					400	400
					400	400
					400	400
					400	400
					400	400
					400	400
					400	400
					400	400
					400	400
					400	400
					400	400
					400	400
					400	400
					400	400
					400	400
					400	400
					400	400
					400	400
					400	400
					400	400
					400	400
					400	400
					400	400
					400	400
					400	400
					400	400
					400	400
					400	400
					400	400
					400	400
					400	400
					400	400
					400	400
					400	400
					400	400
					400	400
					400	400
					800	400
					800	400
					800	400
					800	400
					800	400
					800	400
					800	400
					800	400
					800	400
					800	400
					800	400
					800	400
					800	400
					800	400
					800	400
					800	400
					800	400
					800	400
					800	400
					800	400
					800	400
					800	400
					800	400
					800	400
					800	400
					800	400
					800	400
					800	400
					800	400
					800	400
					800	400
					800	400
					800	400
					800	400
					800	400
					800	400
					800	400
					800	400
					800	400
					800	400
					800	400
					800	400
					800	400
					800	400
					800	400
					800	400
					800	400
					800	400
					800	400
					800	400
					800	400
					800	400
					800	400
					800	400
					800	400
					800	400
					800	400
					800	400
					800	400
					800	400
					800	400
					800	400
					800	400
					800	400
					800	400
					800	400
					800	400
					800	400
					800	400
					800	400
					800	400
					800	400
					800	400
					800	400
					800	400
					800	400
					800	400
					800	400
					800	400
					800	400
					800	400
					800	400
					800	400
					800	400
					800	400
					800	400
					800	400
					800	400
					800	400
					800	400
					800	400
					800	400
					800	400
					800	400
					800	400
					800	400
					800	400
					800	400
					800	400
					800	400
					800	400
					800	400
					800	400
					800	400
					800	400
					800	400
					800	400
					800	400
					800	400
					800	400
					800	400
					800	400
					800	400
					800	400
					800	400
					800	400
					800	400
					800	400
					800	400
					800	400
					800	400
					800	400
					800	400
					800	400
					800	400
					800	400
					800	400
					800	400
					800	400
					800	400
					800	400
					800	400
					800	400
					800	400
					800	400
					800	400
					800	400
					800	400
					800	400
					800	400
					800	400
					800	400
					800	400
					800	400
					800	400
					800	400
					800	400
					800	400
					800	400
					800	400
					800	400
					800	400
					800	400
					800	400
					800	400
					800	400
					800	400
					800	400
					800	400
					800	400
					800	400
					800	400
					800	400
					800	400
					800	400
					800	400
					800	400
					800	400
					800	400
					800	400
					800	400
					800	400
					800	400
					800	400
					800	400
					800	400
					800	400
					800	400
					800	400
					800	400
					800	400
					800	400
					800	400
					800	400
					800	400
					800	400
					800	400
					800	400
					800	400
					800	400
					800	400
					800	400
					800	400
					800	400
					800	400
					800	400
					800	400
					800	400
					800	400
					800	400
					800	400
					800	400
					800	400
					800	400
					800	400
					800	400
					800	400
					800	400
					800	400
					800	400
					800	400
					800	400
					800	400
					800	400
					800	400
					800	400
					800	400
					800	400
					800	400
					800	400
					800	400
					800	400
					800	400
					800	400
					800	400
					800	400
					800	400
					800	400
					800	400
					800	400
					800	400
					800	400
					800	400
					800	400
					800	400
					800	400
					800	400
					800	400
					800	400
					800	400
					800	400
					800	400
					800	400
					800	400
					800	400
					800	400
					800	400
					800	400
					800	400
					800	400
					800	400
					800	400
					800	400
					800	400
					800	400
					800	400
					800	400
					800	400
					800	400
					800	400
					800	400
					800	400
					800	400
					800	400
					800	400
					800	400
					800	400
					800	400
					800	400
					800	400
					800	400
					800	400
					800	400
					800	400
					800	400
					800	400
					800	400
					800	400
					800	400
					800	400
					800	400
					800	400
					800	400
					800	400
					800	400
					800	400
					800	400
					800	400
					800	400
					800	400
					800	400
					800	400
					800	400
					800	400
					800	400
					800	400
					800	400
					800	400
					800	400
					800	400
					800	400
					800	400
					800	400
					800	400
					800	400
					800	400
					800	400
					800	400
					800	400
					800	400
					800	400
					800	400
					800	400
					800	400
					800	400
					800	400
					800	400
					800	400
					800	400
					800	400
					800	400
					800	400
					800	400
					800	400
					800	400
					800	400
					800	400
					800	400
					800	400
					800	400
					800	400
					800	400
					800	400
					800	400
					800	400
					800	400
					800	400
					800	400
					800	400
					800	400
					800	400
					800	400
					800	400
					800	400
					800	400
					800	400
					800	400
					800	400
					800	400
					800	400
					800	400
					800	400
					800	400
					800	400
					800	400
					800	400
					800	400
					800	400
					800	400
					800	400
					800	400
					800	400
					800	400
					800	400
					800	400
					800	400
					800	400
					800	400
					800	400
					800	400
					800	400
					800	400
					800	400
					800	400
					800	400
					800	400
					800	400
					1200	400
					1200	400
					1200	400
					1200	400
					1200	400
					1200	400
					1200	400
					1200	400
					1200	400
					1200	400
					1200	400
					1200	400
					1200	400
					1200	400
					1200	400
					1200	400
					1200	400
					1200	400
					1200	400
					1200	400
					1200	400
					1200	400
					1200	400
					1200	400
					1200	400
					1200	400
					1200	400
					1200	400
					1200	400
					1200	400
					1200	400
					1200	400
					1200	400
					1200	400
					1200	800
					1200	800
					1200	800
					1200	800
					1200	800
					1200	800
					1200	800
					1200	800
					1200	800
					1200	800
					1200	800
					1200	800
					1200	800
					1200	800
					1200	800
					1200	800
					1200	800
					1200	800
					1200	800
					1200	800
					1200	800
					1200	800
					1200	800
					1200	800
					1200	800
					1200	800
					1200	800
					1200	800
					1200	800
					1200	800
					1200	800
					1200	800
					1200	800
					1200	800
					1200	800
					1200	800
					1200	800
					1200	800
					1200	800
					1200	800
					1200	800
					1200	800
					1200	800
					1200	800
					1200	800
					1200	800
					1200	800
					1200	800
					1200	800
					1200	800
					1200	800
					1200	800
					1200	800
					1200	800
					1200	800
					1200	800
					1200	800
					1200	800
					1200	800
					1200	800
					1200	800
					1200	800
					1200	800
					1200	800
					1200	800
					1200	800
					1200	800
					1200	800
					1200	800
					1200	800
					1200	800
					1200	800
					1200	800
					1200	800
					1200	800
					1200	800
					1200	800
					1200	800
					1200	800
					1200	800
					1200	800
					1200	800
					1200	800
					1200	800
					1200	800
					1200	800
					1200	800
					1200	800
					1200	800
					1200	800
					1200	800
					1200	800
					1200	800
					1200	800
					1200	800
					1200	800
					1200	800
					1200	800
					1200	800
					1200	800
					1200	800
					1200	800
					1200	800
					1200	800
					1200	800
					1200	800
					1200	800
					1200	800
					1200	800
					1200	800
					1200	800
					1200	800
					1200	800
					1200	800
					1200	800
					1200	800
					1200	800
					1200	800
					1200	800
					1200	800
					1200	800
					1200	800
					1200	800
					1200	800
					1200	800
					1200	800
					1200	800
					1200	800
					1200	800
					1200	800
					1200	800
					1200	800
					1200	800
					1200	800
					1200	800
					1200	800
					1200	800
					1200	800
					1200	800
					1200	800
					1200	800
					1200	800
					1200	800
					1200	800
					1200	800
					1200	800
					1200	800
					1200	800
					1200	800
					1200	800
					1200	800
					1200	800
					1200	800
					1200	800
					1200	800
					1200	800
					1200	800
					1200	800
					1200	800
					1200	800
					1200	800
					1200	800
					1200	800
					1200	800
					1200	800
					1200	800
					1200	800
					1200	800
					1200	800
					1200	800
					1200	800
					1200	800
					1200	800
					1200	800
					1200	800
					1200	800
					1200	800
					1200	800
					1200	800
					1200	800
					1200	800
					1200	800
					1200	800
					1200	800
					1200	800
					1200	800
					1200	800
					1200	800
					1200	800
					1200	800
					1200	800
					1200	800
					1200	800
					1200	800
					1200	800
					1200	800
					1200	800
					1200	800
					1200	800
					1200	800
					1200	800
					1200	800
					1200	800
					1200	800
					1200	800
					1200	800
					1200	800
					1200	800
					1200	800
					1200	800
					1200	800
					1200	800
					1200	800
					1200	800
					1200	800
					1200	800
					1200	800
					1200	800
					1200	800
					1200	800
					1200	800
					1200	800
					1200	800
					1200	800
					1200	800
					1200	800
					1200	800
					1200	800
					1200	800
					1200	800
					1200	800
					1200	800
					1200	800
					1200	800
					1200	800
					1600	800
					1600	800
					1600	800
					1600	800
					1600	800
					1600	800
					1600	800
					1600	800
					1600	800
					1600	800
					1600	800
					1600	800
					1600	800
					1600	800
					1600	800
					1600	800
					1600	800
					1600	800
					1600	800
					1600	800
					1600	800
					1600	800
					1600	800
					1600	800
					1600	800
					1600	800
					1600	800
					1600	800
					1600	800
					1600	800
					1600	800
					1600	800
					1600	800
					1600	800
					1600	800
					1600	800
					1600	800
					1600	800
					1600	800
					1600	800
					1600	800
					1600	800
					1600	800
					1600	800
					1600	800
					1600	800
					1600	800
					1600	800
					1600	800
					1600	800
					1600	800
					1600	800
					1600	800
					1600	800
					1600	800
					1600	800
					1600	800
					1600	800
					1600	800
					1600	800
					1600	800
					1600	800
					1600	800
					1600	800
					1600	800
					1600	800
					1600	800
					1600	800
					1600	800
					1600	800
					1600	800
					1600	800
					1600	800
					1600	800
					1600	800
					1600	800
					1600	800
					1600	800
					1600	800
					1600	800
					1600	800
					1600	800
					1600	800
					1600	800
					1600	800
					1600	800
					1600	800
					1600	800
					1600	800
					1600	800
					1600	800
					1600	800
					1600	800
					1600	800
					1600	800
					1600	800
					1600	800
					1600	800
					1600	800
					1600	800
					1600	800
					1600	800
					1600	800
					1600	800
					1600	800
					1600	800
					1600	800
					1600	800
					1600	800
					1600	800
					1600	800
					1600	800
					1600	800
					1600	800
					1600	800
					1600	800
					1600	800
					1600	800
					1600	800
					1600	800
					1600	800
					1600	800
					1600	800
					1600	800
					1600	800
					1600	800
					1600	800
					1600	800
					1600	800
					1600	800
					1600	800
					1600	800
					1600	800
					1600	800
					1600	800
					1600	800
					1600	800
					1600	800
					1600	800
					1600	800
					1600	800
					1600	800
					1600	800
					1600	800
					1600	800
					1600	800
					1600	800
					1600	800
					1600	800
					1600	800
					1600	800
					1600	800
					1600	800
					1600	800
					1600	800
					1600	800
					1600	800
					1600	800
					1600	800
					1600	800
					1600	800
					1600	800
					1600	800
					1600	800
					1600	800
					1600	800
					1600	800
					1600	800
					1600	800
					1600	800
					1600	800
					1600	800
					1600	800
					1600	800
					1600	800
					1600	800
					1600	800
					2000	800
					2000	800
					2000	800
					2000	800
					2000	800
					2000	800
					2000	800
					2000	800
					2000	800
					2000	800
					2000	800
					2000	800
					2000	800
					2000	800
					2000	800
					2000	800
					2000	800
					2000	800
					2000	800
					2000	800
					2000	800
					2000	800
					2000	800
					2000	800
					2000	800
					2000	800
					2000	800
					2000	800
					2000	800
					2000	800
					2000	800
					2000	800
					2000	800
					2000	800
					2000	800
					2000	800
					2000	800
					2000	800
					2000	800
					2000	800
					2000	800
					2000	800
					2000	800
					2000	800
					2000	800
					2000	800
					2000	800
					2000	800
					2000	800
					2000	800
					2000	800
					2000	800
					2000	800
					2000	800
					2000	800
					2000	800
					2000	800
					2000	800
					2000	800
					2000	800
					2000	800
					2000	800
					2000	800
					2000	800
					2000	800
					2000	800
					2000	800
					2000	800
					2000	800
					2000	800
					2000	800
					2000	800
					2000	800
					2000	800
					2000	800
					2000	800
					2000	800
					2000	800
					2000	800
					2000	800
					2000	800
					2000	800
					2000	800
					2000	800
					2000	800
					2000	800
					2000	800
					2000	800
					2000	800
					2000	800
					2000	800
					2000	800
					2000	800
					2000	800
					2000	800
					2000	800
					2000	800
					2000	800
					2000	800
					2000	800
					2000	800
					2000	800
					2000	800
					2000	800
					2000	800
					2000	800
					2000	800
					2000	800
					2000	800
					2000	800
					2000	800
					2000	800
					2000	800
					2000	800
					2000	800
					2000	800
					2000	800
					2000	800
					2000	800
					2000	800
					2000	800
					2000	800
					2000	800
					2000	800
					2000	800
					2000	800
					2000	800
					2000	800
					2400	800
					2400	800
					2400	800
					2400	800
					2400	800
					2400	800
					2400	800
					2400	800
					2400	800
					2400	800
					2400	800
					2400	800
					2400	800
					2400	800
					2400	800
					2400	800
					2400	800
					2400	800
					2400	800
					2400	800
					2400	800
					2400	800
					2400	800
					2400	800
					2400	800
					2400	800
					2400	800
					2400	800
					2400	800
					2400	800
					2400	800
					2400	800
					2400	800
					2400	800
					2400	800
					2400	800
					2400	800
					2400	800
					2400	800
					2400	800
					2400	800
					2400	800
					2400	800
					2400	800
					2400	800
					2400	800
					2400	800
					2400	800
					2400	800
					2400	800
					2400	800
					2400	800
					2400	800
					2400	800
					2400	800
					2400	800
					2400	800
					2400	800
					2400	800
					2400	800
					2400	1200
					2400	1200
					2400	1200
					2400	1200
					2400	1200
					2400	1200
					2400	1200
					2400	1200
					2400	1200
					2400	1200
					2400	1200
					2400	1200
					2400	1200
					2400	1200
					2400	1200
					2400	1200
					2400	1200
					2400	1200
					2400	1200
					2400	1200
					2400	1200
					2400	1200
					2400	1200
					2400	1200
					2400	1200
					2400	1200
					2400	1200
					2400	1200
					2400	1200
					2400	1200
					2400	1200
					2800	1200
					2800	1200
					2800	1200
					2800	1200
					2800	1200
					2800	1200
					2800	1200
					2800	1200
					2800	1200
					2800	1200
					2800	1200
					2800	1200
					2800	1200
					2800	1200
					2800	1200
					2800	1200
					2800	1200
					2800	1200
					2800	1200
					2800	1200
					2800	1200
					2800	1200
					2800	1200
					2800	1200
					2800	1200
					2800	1200
					2800	1200
					2800	1200
					2800	1200
					2800	1200
					2800	1200
					2800	1200
					2800	1200
					2800	1200
					2800	1200
					2800	1200
					2800	1200
					2800	1200
					2800	1200
					2800	1200
					2800	1200
					2800	1200
					2800	1200
					2800	1200
					2800	1200
					2800	1200
					2800	1200
					2800	1200
					2800	1200
					2800	1200
					2800	1200
					2800	1200
					2800	1200
					2800	1200
					2800	1200
					2800	1200
					2800	1200
					2800	1200
					2800	1200
					2800	1200
					2800	1200
					2800	1200
					2800	1200
					2800	1200
					2800	1200
					2800	1200
					3200	1200
					3200	1200
					3200	1200
					3200	1200
					3200	1200
					3200	1200
					3200	1200
					3200	1200
					3200	1200
					3200	1200
					3200	1200
					3200	1200
					3200	1200
					3200	1200
					3200	1200
					3200	1200
					3200	1200
					3200	1200
					3200	1200
					3200	1200
					3200	1200
					3200	1200
					3200	1200
					3200	1200
					3200	1200
					3200	1200
					3200	1200
					3200	1200
					3200	1200
					3200	1200
					3200	1200
					3200	1200
					3200	1200
					3200	1200
					3200	1200
					3200	1200
					3200	1200
					3200	1200
					3200	1200
					3200	1200
					3200	1200
					3200	1200
					3200	1200
					3200	1200
					3200	1200
					3600	1200
					3600	1200
					3600	1200
					3600	1200
					3600	1200
					3600	1200
					3600	1200
					3600	1200
					3600	1200
					3600	1200
					3600	1200
					3600	1200
					3600	1200
					3600	1200
					3600	1200
					3600	1200
					3600	1200
					3600	1200
					3600	1200
					3600	1200
					3600	1200
					3600	1200
					3600	1200
					3600	1200
					3600	1200
					3600	1200
					3600	1200
					3600	1200
					3600	1200
					3600	1200
					3600	1200
					3600	1200
					3600	1200
					3600	1200
					3600	1200
					3600	1200
					3600	1200
					3600	1200
					3600	1200
					3600	1200
					3600	1200
					3600	1200
					3600	1200
					3600	1200
					3600	1200
					3600	1200
					3600	1200
					3600	1200
					3600	1200
					3600	1200
					4000	1200
					4000	1200
					4000	1200
					4000	1200
					4000	1200
					4000	1200
					4000	1200
					4000	1200
					4000	1200
					4000	1200
					4000	1200
					4000	1200
					4000	1200
					4000	1200
					4000	1200
					4000	1200
					4000	1200
[truncated: 49,730 more rows]

## Sheet: Figure 4D
Colocalized Cluster density	Control	STIM1 smKO		Colocalized Cluster size	Individual Cluster areas (nm2)				Control	STIM1 smKO
Cell 1	2.83702	2.21324			Control	STIM1 smKO		Number of values	5164	3981
Cell 2	3.11581	1.77948			400	400
Cell 3	3.05202	2.91657			400	400		Minimum	400	400
Cell 4	3.34856	3.09094			400	400		25% Percentile	2400	2000
Cell 5	2.40531	3.67795			400	400		Median	4400	3600
Cell 6	2.38355	5.70625			400	400		75% Percentile	8400	6400
Cell 7	3.75147	1.39422			400	800		Maximum	180800	100800
Cell 8	2.90725	1.70128			400	800
Cell 9	1.79424	0.904603			800	800		Mean	7635	5434
Cell 10	3.81561	1.90497			800	800		Std. Deviation	11346	6630
Cell 11	4.70739	0.67958			800	800		Std. Error of Mean	157.9	105.1
Cell 12	5.25807	5.54005			800	800
Cell 13	3.0178	4.66766			800	800		Lower 95% CI	7325	5228
Cell 14	4.20434	3.47368			800	800		Upper 95% CI	7944	5640
Cell 15	3.33378	1.89491			800	800
					800	800		Unpaired t test
Minimum	1.794	0.6796			800	800		P value	<0.0001
25% Percentile	2.837	1.701			800	1200		Significantly different (P < 0.05)?	Yes
Median	3.116	2.213			1200	1200		One- or two-tailed P value?	Two-tailed
75% Percentile	3.816	3.678			1200	1200
Maximum	5.258	5.706			1200	1200		Mean of column A	7635
					1200	1200		Mean of column B	5434
Mean	3.329	2.77			1600	1200		Difference between means (B - A) ± SEM	-2201 ± 202.1
Std. Deviation	0.9081	1.582			1600	1200		95% confidence interval	-2597 to -1805
Std. Error of Mean	0.2345	0.4084			1600	1200
					1600	1200
Lower 95% CI	2.826	1.894			1600	1600
Upper 95% CI	3.832	3.646			1600	1600
					1600	1600
Unpaired t test					1600	1600
P value	0.2451				1600	1600
Significantly different (P < 0.05)?	No				1600	1600
One- or two-tailed P value?	Two-tailed				1600	1600
					1600	1600
Mean of column A	3.329				2000	1600
Mean of column B	2.77				2000	1600
Difference between means (B - A) ± SEM	-0.5591 ± 0.4709				2000	1600
95% confidence interval	-1.524 to 0.4055				2000	1600
					2000	1600
					2000	1600
					2000	1600
					2000	1600
					2000	1600
					2000	1600
					2400	1600
					2400	2000
					2400	2000
					2400	2000
					2400	2000
					2400	2000
					2400	2000
					2400	2000
					2400	2000
					2400	2000
					2400	2000
					2400	2000
					2800	2000
					2800	2000
					2800	2000
					2800	2000
					2800	2400
					2800	2400
					2800	2400
					2800	2400
					2800	2400
					2800	2400
					2800	2400
					3200	2400
					3200	2400
					3200	2400
					3200	2400
					3200	2400
					3200	2400
					3200	2400
					3200	2400
					3200	2400
					3200	2400
					3600	2400
					3600	2400
					3600	2800
					3600	2800
					3600	2800
					3600	2800
					3600	3200
					3600	3200
					3600	3200
					3600	3200
					3600	3200
					3600	3200
					4000	3200
					4000	3200
					4000	3200
					4000	3600
					4000	3600
					4000	3600
					4000	3600
					4000	3600
					4000	3600
					4000	3600
					4000	3600
					4000	3600
					4400	3600
					4400	3600
					4400	3600
					4400	3600
					4400	3600
					4400	3600
					4400	3600
					4400	3600
					4400	4000
					4800	4000
					4800	4000
					4800	4000
					4800	4000
					4800	4000
					4800	4000
					4800	4000
					4800	4000
					4800	4000
					4800	4000
					4800	4000
					4800	4000
					5200	4000
					5200	4000
					5200	4000
					5200	4000
					5200	4000
					5200	4000
					5200	4400
					5200	4400
					5200	4400
					5200	4400
					5200	4400
					5600	4400
					5600	4400
					5600	4400
					5600	4400
					6000	4400
					6000	4400
					6000	4800
					6000	4800
					6000	4800
					6000	4800
					6400	4800
					6400	5200
					6400	5200
					6400	5200
					6800	5200
					6800	5200
					6800	5200
					7200	5200
					7200	5200
					7200	5600
					7200	5600
					7600	5600
					7600	5600
					7600	5600
					8000	5600
					8000	5600
					8000	6000
					8000	6000
					8400	6000
					8800	6000
					9200	6000
					9600	6000
					9600	6000
					9600	6000
					10000	6000
					10000	6000
					10400	6000
					10400	6400
					10400	6400
					10800	6400
					11600	6400
					12000	6400
					12400	6400
					13600	6400
					14000	6400
					14000	6800
					14400	6800
					14400	6800
					14800	6800
					16800	6800
					17200	6800
					17200	6800
					18400	7200
					19200	7200
					19600	7200
					20800	7200
					21200	7200
					22400	7200
					23600	7600
					26400	7600
					36000	7600
					400	7600
					400	8000
					400	8000
					400	8000
					400	8000
					800	8000
					800	8000
					800	8000
					800	8000
					800	8400
					800	8400
					800	8400
					800	8400
					800	8400
					800	8400
					1200	8400
					1200	8800
					1200	9200
					1200	9200
					1200	9600
					1200	9600
					1200	9600
					1200	9600
					1200	10000
					1200	10400
					1200	10400
					1200	11200
					1200	11200
					1200	11200
					1200	11600
					1200	12400
					1600	12400
					1600	12400
					1600	12400
					1600	12800
					1600	13200
					1600	13200
					1600	13200
					1600	13200
					1600	13600
					1600	14400
					1600	16000
					1600	16000
					2000	17200
					2000	17200
					2000	17200
					2000	17600
					2000	18000
					2000	18000
					2000	18000
					2000	18400
					2000	18400
					2400	20000
					2400	20400
					2400	21200
					2400	21200
					2400	21600
					2400	22000
					2400	22800
					2400	24800
					2400	26400
					2400	29200
					2400	29600
					2400	30000
					2400	30400
					2400	30400
					2800	31600
					2800	32800
					2800	32800
					2800	34400
					2800	34800
					2800	36400
					3200	40000
					3200	44000
					3200	57200
					3200	400
					3200	400
					3200	400
					3200	800
					3200	800
					3200	800
					3200	800
					3200	800
					3200	800
					3600	800
					3600	800
					3600	800
					3600	1200
					3600	1200
					3600	1200
					3600	1200
					4000	1200
					4000	1200
					4000	1200
					4000	1200
					4000	1200
					4000	1200
					4000	1600
					4400	1600
					4400	1600
					4400	1600
					4400	1600
					4400	1600
					4400	1600
					4400	1600
					4400	1600
					4400	1600
					4400	1600
					4800	1600
					4800	1600
					4800	1600
					4800	1600
					4800	1600
					4800	1600
					4800	1600
					4800	1600
					5200	1600
					5200	2000
					5200	2000
					5200	2000
					5200	2000
					5200	2000
					5200	2000
					5600	2000
					5600	2400
					5600	2400
					6000	2400
					6000	2400
					6400	2400
					6400	2400
					6400	2400
					6400	2400
					6400	2400
					6400	2400
					6400	2400
					6800	2400
					6800	2800
					6800	2800
					7600	2800
					7600	2800
					7600	2800
					8000	2800
					8000	2800
					8000	2800
					8400	2800
					8400	2800
					8400	2800
					9200	2800
					9200	2800
					9600	3200
					9600	3200
					10000	3200
					10400	3200
					10400	3200
					10800	3200
					10800	3200
					12000	3200
					12000	3200
					12000	3200
					12000	3200
					12000	3200
					12400	3200
					12800	3200
					12800	3200
					13200	3200
					13600	3200
					13600	3600
					15600	3600
					17600	3600
					18800	3600
					19200	3600
					25200	3600
					28800	3600
					400	3600
					400	3600
					400	3600
					400	3600
					400	3600
					400	3600
					400	3600
					800	4000
					800	4000
					800	4000
					800	4000
					800	4000
					800	4000
					800	4000
					1200	4000
					1200	4000
					1200	4000
					1200	4000
					1200	4000
					1200	4000
					1200	4000
					1200	4000
					1200	4400
					1200	4400
					1200	4400
					1200	4400
					1200	4400
					1600	4400
					1600	4400
					1600	4400
					1600	4800
					1600	4800
					1600	4800
					1600	4800
					1600	4800
					1600	4800
					1600	4800
					1600	4800
					1600	4800
					1600	5200
					1600	5200
					1600	5200
					1600	5200
					1600	5200
					1600	5200
					1600	5200
					1600	5600
					1600	5600
					1600	5600
					1600	6000
					2000	6000
					2000	6000
					2000	6400
					2000	6400
					2000	6800
					2000	6800
					2000	6800
					2000	6800
					2000	6800
					2000	6800
					2000	6800
					2000	6800
					2000	7200
					2400	7200
					2400	7600
					2400	7600
					2400	7600
					2400	8400
					2400	8400
					2400	8400
					2400	9200
					2400	9200
					2400	9600
					2400	9600
					2400	9600
					2400	10000
					2400	10000
					2400	10000
					2400	10400
					2400	10400
					2400	11200
					2400	11200
					2800	11600
					2800	13600
					2800	14400
					2800	14400
					2800	15200
					2800	15600
					2800	17200
					2800	20400
					2800	21600
					2800	22000
					2800	22400
					2800	23200
					2800	28400
					2800	32400
					3200	400
					3200	400
					3200	400
					3200	400
					3200	400
					3200	400
					3200	400
					3200	800
					3200	800
					3200	800
					3200	800
					3200	800
					3600	800
					3600	800
					3600	1200
					3600	1200
					3600	1200
					3600	1200
					3600	1200
					3600	1200
					3600	1200
					3600	1200
					3600	1200
					3600	1200
					3600	1200
					3600	1600
					3600	1600
					3600	1600
					3600	1600
					3600	1600
					3600	1600
					4000	1600
					4000	1600
					4000	1600
					4000	1600
					4000	1600
					4000	1600
					4000	1600
					4000	1600
					4400	1600
					4400	1600
					4400	2000
					4400	2000
					4400	2000
					4400	2000
					4400	2000
					4400	2000
					4400	2000
					4400	2000
					4400	2000
					4400	2000
					4800	2000
					4800	2000
					4800	2400
					4800	2400
					4800	2400
					4800	2400
					4800	2400
					4800	2400
					4800	2400
					4800	2400
					4800	2400
					4800	2400
					4800	2400
					5200	2400
					5200	2400
					5200	2400
					5200	2400
					5200	2400
					5200	2400
					5200	2800
					5200	2800
					5200	2800
					5600	2800
					5600	2800
					5600	2800
					5600	2800
					5600	2800
					5600	2800
					5600	2800
					5600	2800
					5600	2800
					5600	2800
					5600	2800
					5600	2800
					5600	2800
					6000	2800
					6000	2800
					6000	2800
					6000	3200
					6000	3200
					6000	3200
					6000	3200
					6000	3200
					6400	3200
					6400	3200
					6400	3200
					6400	3200
					6400	3200
					6400	3200
					6400	3200
					6400	3200
					6400	3200
					6800	3200
					6800	3600
					6800	3600
					6800	3600
					6800	3600
					6800	3600
					6800	3600
					6800	3600
					6800	4000
					7200	4000
					7200	4000
					7200	4000
					7200	4000
					7600	4000
					7600	4000
					7600	4000
					7600	4000
					8000	4000
					8000	4400
					8000	4400
					8000	4400
					8400	4400
					8400	4400
					8400	4400
					8400	4400
					8400	4400
					8400	4400
					8400	4400
					8400	4800
					8800	4800
					8800	4800
					8800	4800
					8800	4800
					8800	4800
					8800	4800
					8800	4800
					9200	5200
					9200	5200
					9200	5200
					9600	5200
					9600	5200
					9600	5200
					9600	5200
					10000	5200
					10000	5200
					10000	5200
					10400	5200
					10400	5200
					10800	5200
					10800	5600
					10800	5600
					10800	5600
					10800	5600
					11200	5600
					11200	5600
					11200	5600
					11200	6000
					11200	6000
					11600	6000
					12000	6000
					12000	6000
					12000	6000
					12000	6000
					12800	6000
					12800	6000
					12800	6000
					13200	6000
					13200	6000
					13200	6000
					13200	6400
					13600	6400
					13600	6400
					13600	6400
					13600	6800
					14000	6800
					14000	6800
					14000	6800
					14400	6800
					14400	6800
					14400	6800
					14400	6800
					14800	7200
					14800	7200
					15200	7200
					15200	7200
					15200	7600
					15600	7600
					15600	7600
					16000	8000
					16000	8000
					16400	8000
					16400	8000
					16800	8000
					17200	8000
					18000	8000
					18800	8400
					19200	8400
					19200	8400
					19200	8400
					20000	8400
					20400	8400
					23600	8800
					24000	8800
					24000	9200
					25200	9200
					27600	9600
					27600	9600
					28000	9600
					28000	9600
					28400	10000
					29200	10000
					29600	10400
					31200	10400
					31600	10400
					31600	10800
					34400	10800
					36400	11200
					36400	11600
					37600	11600
					38000	12000
					38000	12000
					38800	12400
					39600	12800
					40800	12800
					42400	12800
					50800	13200
					53600	13200
					60400	13600
					400	13600
					400	14000
					400	16000
					400	16800
					400	17600
					400	17600
					400	18000
					800	20800
					800	22000
					800	23600
					800	27200
					800	29600
					800	30000
					800	400
					800	400
					800	800
					800	800
					1200	800
					1200	800
					1200	800
					1200	800
					1200	800
					1200	800
					1200	800
					1200	800
					1200	800
					1200	800
					1200	1200
					1200	1200
					1200	1200
					1600	1200
					1600	1200
					1600	1200
					1600	1200
					1600	1200
					1600	1200
					1600	1200
					1600	1200
					1600	1600
					1600	1600
					1600	1600
					1600	1600
					1600	1600
					2000	1600
					2000	1600
					2000	1600
					2000	1600
					2000	1600
					2000	1600
					2000	1600
					2000	1600
					2000	1600
					2000	1600
					2000	1600
					2000	2000
					2000	2000
					2000	2000
					2000	2000
					2400	2000
					2400	2000
					2400	2000
					2400	2000
					2400	2000
					2400	2000
					2400	2000
					2400	2000
					2400	2000
					2400	2000
					2400	2000
					2400	2000
					2400	2000
					2400	2000
					2400	2000
					2400	2000
					2400	2400
					2400	2400
					2400	2400
					2400	2400
					2400	2400
					2800	2400
					2800	2400
					2800	2400
					2800	2400
					2800	2400
					2800	2400
					2800	2400
					2800	2400
					2800	2400
					2800	2400
					2800	2400
					2800	2400
					2800	2400
					2800	2800
					2800	2800
					2800	2800
					2800	2800
					2800	2800
					2800	2800
					2800	2800
					2800	2800
					2800	2800
					3200	2800
					3200	2800
					3200	2800
					3200	2800
					3200	2800
					3200	2800
					3200	2800
					3200	2800
					3200	2800
					3200	3200
					3200	3200
					3200	3200
					3200	3200
					3600	3200
					3600	3200
					3600	3200
					3600	3200
					3600	3200
					3600	3200
					3600	3200
					3600	3200
					3600	3200
					3600	3200
					3600	3600
					3600	3600
					4000	3600
					4000	3600
					4000	3600
					4000	3600
					4000	3600
					4000	3600
					4000	3600
					4000	3600
					4000	3600
					4000	3600
					4000	3600
					4000	3600
					4400	3600
					4400	3600
					4400	3600
					4400	3600
					4400	3600
					4400	3600
					4400	3600
					4400	3600
					4400	3600
					4400	4000
					4400	4000
					4400	4000
					4400	4000
					4400	4000
					4800	4000
					4800	4000
					4800	4000
					4800	4000
					4800	4000
					4800	4000
					4800	4000
					4800	4400
					4800	4400
					4800	4400
					4800	4400
					5200	4400
					5200	4400
					5200	4400
					5200	4400
					5200	4400
					5200	4400
					5200	4400
					5200	4400
					5200	4400
					5200	4400
					5200	4800
					5200	4800
					5200	4800
					5200	4800
					5200	4800
					5200	4800
					5200	4800
					5600	4800
					5600	5200
					5600	5200
					5600	5200
					5600	5200
					5600	5200
					5600	5200
					5600	5200
					6000	5200
					6000	5200
					6000	5200
					6000	5600
					6000	5600
					6000	5600
					6000	5600
					6000	5600
					6000	5600
					6000	5600
					6000	5600
					6400	5600
					6400	6000
					6400	6000
					6800	6000
					6800	6000
					6800	6000
					6800	6000
					6800	6400
					6800	6400
					6800	6400
					6800	6400
					6800	6400
					6800	6400
					6800	6400
					6800	6800
					6800	6800
					6800	6800
					6800	6800
					6800	6800
					6800	7200
					7200	7200
					7200	7200
					7200	7200
					7200	7200
					7200	7600
					7200	7600
					7200	7600
					7600	8000
					7600	8000
					7600	8400
					7600	8800
					7600	8800
					7600	9200
					7600	9200
					7600	9200
					7600	9200
					8000	9200
					8000	9600
					8000	9600
					8000	9600
					8000	9600
					8000	9600
					8000	9600
					8000	9600
					8000	10000
					8000	10000
					8400	10000
					8400	10400
					8400	10400
					8400	10400
					8400	10400
					8800	10400
					8800	10400
					8800	11200
					8800	11200
					8800	11600
					9200	11600
					9200	11600
					9200	12000
					9200	12000
					9200	12000
					9200	12000
					9600	12400
					9600	12400
					9600	12400
					9600	12800
					9600	12800
					9600	13200
					9600	13200
					10000	13200
					10000	13600
					10000	14400
					10000	14800
					10000	15200
					10000	15600
					10400	15600
					10800	15600
					10800	16400
					10800	16800
					10800	17200
					10800	17600
					10800	17600
					10800	19200
					10800	20400
					11200	21600
					11200	22000
					11600	23200
					11600	23600
					11600	24400
					11600	26000
					11600	41200
					11600	42800
					12000	400
					12400	400
					12400	800
					12800	800
					13200	800
					13200	800
					13200	800
					13200	800
					13200	800
					13200	800
					13200	800
					13600	800
					13600	800
					13600	800
					13600	800
					13600	800
					14000	800
					14000	800
					14000	800
					14000	800
					14000	800
					14000	800
					14400	1200
					14400	1200
					14800	1200
					14800	1200
					14800	1200
					14800	1200
					15200	1200
					15200	1200
					15200	1200
					15200	1200
					15600	1200
					15600	1200
					16000	1200
					16000	1200
					16000	1200
					16000	1600
					16000	1600
					16400	1600
					16400	1600
					16400	1600
					16400	1600
					16800	1600
					17200	1600
					17600	1600
					17600	1600
					18000	1600
					18400	1600
					18400	1600
					18800	1600
					18800	1600
					18800	1600
					18800	2000
					19200	2000
					19600	2000
					19600	2000
					20000	2000
					20400	2000
					20800	2000
					22400	2000
					22400	2000
					22800	2000
					24400	2000
					24400	2000
					24800	2000
					24800	2000
					27200	2000
					27600	2000
					28000	2000
					28800	2000
					30000	2400
					30000	2400
					32400	2400
					33600	2400
					34000	2400
					34800	2400
					37600	2400
					39200	2400
					39200	2400
					43600	2400
					44400	2400
					44800	2400
					56800	2400
					70800	2400
					94400	2400
					400	2400
					400	2400
					400	2400
					400	2400
					400	2400
					400	2800
					400	2800
					800	2800
					800	2800
					800	2800
					800	2800
					800	2800
					800	2800
					800	2800
					800	2800
					800	2800
					800	2800
					800	2800
					800	2800
					800	2800
					800	2800
					800	2800
					800	2800
					800	2800
					800	3200
					800	3200
					1200	3200
					1200	3200
					1200	3200
					1200	3200
					1200	3200
					1200	3200
					1200	3200
					1200	3200
					1200	3200
					1200	3200
					1200	3200
					1200	3200
					1200	3200
					1200	3200
					1200	3200
					1200	3200
					1200	3200
					1200	3600
					1200	3600
					1200	3600
					1200	3600
					1600	3600
					1600	3600
					1600	3600
					1600	3600
					1600	3600
					1600	3600
					1600	3600
					1600	4000
					1600	4000
					1600	4000
					1600	4000
					1600	4000
					1600	4000
					1600	4000
					1600	4000
					1600	4000
					1600	4000
					1600	4000
					1600	4000
					1600	4000
					1600	4000
					1600	4000
					2000	4000
					2000	4000
					2000	4000
					2000	4000
					2000	4000
					2000	4000
					2000	4000
					2000	4000
					2000	4000
					2000	4000
					2000	4000
					2000	4000
					2000	4000
					2000	4400
					2000	4400
					2000	4400
					2000	4400
					2000	4400
					2000	4400
					2000	4400
					2000	4400
					2000	4400
					2000	4400
					2400	4400
					2400	4400
					2400	4400
					2400	4400
					2400	4800
					2400	4800
					2400	4800
					2400	4800
					2400	4800
					2400	4800
					2400	4800
					2400	4800
					2400	4800
					2400	4800
					2400	4800
					2400	4800
					2400	4800
					2800	4800
					2800	4800
					2800	5200
					2800	5200
					2800	5200
					2800	5200
					2800	5200
					2800	5200
					2800	5200
					2800	5200
					2800	5200
					2800	5200
					2800	5600
					3200	5600
					3200	5600
					3200	5600
					3200	5600
					3200	5600
					3200	5600
					3200	5600
					3200	5600
					3200	5600
					3200	5600
					3200	5600
					3200	6000
					3200	6000
					3200	6000
					3200	6000
					3600	6000
					3600	6000
					3600	6000
					3600	6000
					3600	6000
					3600	6000
					3600	6000
					3600	6000
					3600	6400
					3600	6400
					3600	6400
					3600	6400
					3600	6400
					3600	6800
					3600	6800
					4000	6800
					4000	6800
					4000	6800
					4000	6800
					4000	6800
					4000	6800
					4000	7200
					4000	7200
					4000	7600
					4000	7600
					4000	7600
					4000	7600
					4400	7600
					4400	7600
					4400	7600
					4400	7600
					4400	7600
					4400	8000
					4400	8000
					4400	8000
					4400	8000
					4400	8000
					4400	8000
					4400	8400
					4400	8400
					4400	8400
					4400	8400
					4400	8400
					4800	8400
					4800	8800
					4800	8800
					4800	8800
					4800	9200
					4800	9200
					4800	9200
					4800	9200
					4800	9600
					4800	9600
					4800	9600
					4800	10000
					4800	10000
					5200	10000
					5200	10000
					5200	10400
					5200	10400
					5200	10400
					5200	10800
					5200	10800
					5200	10800
					5200	10800
					5600	10800
					5600	10800
					5600	11600
					6000	11600
					6000	11600
					6000	12000
					6000	12000
					6000	12000
					6000	12400
					6000	12400
					6000	12400
					6000	12800
					6400	12800
					6400	13200
					6400	13600
					6400	13600
					6400	13600
					6400	13600
					6400	14400
					6800	14400
					6800	14400
					6800	14400
					6800	14800
					6800	14800
					6800	15600
					7200	16000
					7200	16400
					7200	16800
					7200	17200
					7200	17600
					7200	18000
					7600	18800
					7600	18800
					8000	19200
					8000	20000
					8000	21200
					8400	21200
					8800	23200
					8800	23600
					8800	25200
					9600	26400
					9600	28800
					9600	33200
					10000	38800
					10000	400
					10000	400
					10400	400
					10800	400
					11200	400
					11200	400
					11600	400
					11600	400
					12000	400
					12400	800
					12800	800
					12800	800
					12800	800
					13200	800
					13200	800
					13200	800
					14000	800
					14000	800
					14000	800
					14000	800
					14800	800
					15200	800
					15200	800
					16000	800
					17200	800
					17600	800
					17600	800
					18000	800
					18000	800
					18800	800
					19600	800
					20000	800
					22800	800
					23200	800
					25200	800
					26000	800
					26800	1200
					29200	1200
					30000	1200
					71200	1200
					400	1200
					400	1200
					400	1200
					400	1200
					400	1200
					800	1200
					800	1200
					800	1200
					800	1200
					800	1200
					800	1200
					800	1200
					800	1200
					800	1200
					800	1200
					800	1200
					800	1200
					800	1200
					800	1200
					800	1200
					800	1200
					800	1200
					800	1200
					1200	1200
					1200	1200
					1200	1200
					1200	1200
					1200	1200
					1200	1200
					1200	1600
					1200	1600
					1200	1600
					1200	1600
					1200	1600
					1200	1600
					1200	1600
					1200	1600
					1200	1600
					1200	1600
					1200	1600
					1200	1600
					1200	1600
					1200	1600
					1200	1600
					1200	1600
					1200	1600
					1200	1600
					1600	1600
					1600	1600
					1600	1600
					1600	1600
					1600	1600
					1600	1600
					1600	1600
					1600	1600
					1600	1600
					1600	1600
					1600	1600
					1600	2000
					1600	2000
					1600	2000
					1600	2000
					1600	2000
					1600	2000
					1600	2000
					1600	2000
					1600	2000
					1600	2000
					1600	2000
					1600	2000
					1600	2000
					1600	2000
					1600	2000
					1600	2000
					1600	2000
					2000	2000
					2000	2000
					2000	2000
					2000	2000
					2000	2000
					2000	2000
					2000	2000
					2000	2000
					2000	2000
					2000	2000
					2000	2000
					2000	2000
					2000	2000
					2000	2000
					2000	2000
					2000	2000
					2000	2000
					2000	2000
					2400	2000
					2400	2400
					2400	2400
					2400	2400
					2400	2400
					2400	2400
					2400	2400
					2400	2400
					2400	2400
					2400	2400
					2400	2400
					2400	2400
					2400	2400
					2400	2400
					2400	2400
					2400	2400
					2400	2400
					2400	2400
					2400	2400
					2400	2400
					2400	2400
					2400	2400
					2800	2400
					2800	2400
					2800	2400
					2800	2400
					2800	2400
					2800	2400
					2800	2400
					2800	2400
					2800	2400
					2800	2400
					2800	2400
					2800	2800
					2800	2800
					2800	2800
					2800	2800
					2800	2800
					2800	2800
					2800	2800
					2800	2800
					2800	2800
					2800	2800
					2800	2800
					2800	2800
					2800	2800
					2800	2800
					2800	2800
					3200	2800
					3200	2800
					3200	2800
					3200	2800
					3200	2800
					3200	2800
					3200	2800
					3200	2800
					3200	2800
					3200	2800
					3200	2800
					3200	2800
					3200	3200
					3200	3200
					3200	3200
					3200	3200
					3200	3200
					3600	3200
					3600	3200
					3600	3200
					3600	3200
					3600	3200
					3600	3200
					3600	3200
					3600	3200
					3600	3200
					3600	3200
					3600	3200
					3600	3200
					3600	3200
					3600	3200
					3600	3200
					3600	3200
					3600	3200
					3600	3200
					4000	3200
					4000	3200
					4000	3200
					4000	3200
					4000	3600
					4000	3600
					4000	3600
					4000	3600
					4000	3600
					4000	3600
					4000	3600
					4000	3600
					4000	3600
					4000	3600
					4000	3600
					4000	3600
					4000	3600
					4000	3600
					4000	3600
					4000	3600
					4400	3600
					4400	3600
					4400	3600
					4400	3600
					4400	3600
					4400	3600
					4400	3600
					4400	3600
					4400	3600
					4400	3600
					4400	3600
					4400	3600
					4400	4000
					4400	4000
					4400	4000
					4400	4000
					4800	4000
					4800	4000
					4800	4000
					4800	4000
					4800	4000
					4800	4000
					4800	4000
					4800	4000
					4800	4000
					4800	4000
					4800	4000
					4800	4000
					4800	4000
					4800	4000
					4800	4000
					4800	4000
					4800	4000
					5200	4000
					5200	4000
					5200	4400
					5200	4400
					5200	4400
					5200	4400
					5200	4400
					5200	4400
					5600	4400
					5600	4400
					5600	4400
					5600	4400
					5600	4400
					6000	4400
					6000	4400
					6000	4400
					6000	4800
					6000	4800
					6000	4800
					6000	4800
					6000	4800
					6000	4800
					6000	4800
					6400	4800
					6400	4800
					6400	4800
					6400	4800
					6400	4800
					6400	4800
					6400	5200
					6400	5200
					6400	5200
					6400	5200
					6800	5200
					6800	5200
					7200	5200
					7200	5200
					7200	5200
					7600	5200
					7600	5200
					7600	5200
					7600	5600
					8000	5600
					8000	5600
					8000	5600
					8000	5600
					8400	5600
					8400	5600
					8400	5600
					8800	5600
					9200	5600
					9200	5600
					9600	5600
					9600	5600
					9600	5600
					10000	6000
					10000	6000
					10000	6000
					10400	6000
					10400	6000
					10400	6000
					10800	6000
					10800	6000
					11200	6000
					11200	6000
					11200	6000
					11600	6400
					11600	6400
					11600	6400
					11600	6400
					11600	6400
					12000	6400
					12400	6400
					12400	6400
					12800	6400
					12800	6400
					13200	6800
					13600	6800
					13600	6800
					13600	6800
					14400	6800
					14400	6800
					14400	6800
					14800	6800
					15600	6800
					16800	6800
					18000	6800
					18400	6800
					18400	6800
					20000	6800
					20800	6800
					23600	7200
					24800	7200
					28400	7200
					31200	7200
					32000	7200
					53600	7200
					58000	7600
					400	7600
					400	7600
					400	7600
					400	7600
					400	7600
					400	7600
					400	8000
					400	8000
					400	8000
					400	8400
					400	8800
					400	8800
					400	9200
					400	9200
					400	9200
					400	9200
					400	9200
					400	9600
					800	9600
					800	9600
					800	9600
					800	10000
					800	10000
					800	10000
					800	10000
					800	10000
					800	10000
					800	10000
					800	10400
					800	10400
					800	10400
					800	10400
					800	10400
					800	10400
					800	10400
					800	10400
					800	10800
					800	10800
					800	10800
					800	11200
					1200	11200
					1200	11200
					1200	11200
					1200	11600
					1200	11600
					1200	11600
					1200	12000
					1200	12000
					1200	12800
					1200	12800
					1200	12800
					1200	12800
					1200	13200
					1200	13200
					1200	13600
					1200	14000
					1200	14000
					1200	15200
					1200	15200
					1200	15600
					1200	16000
					1200	16800
					1200	16800
					1200	17200
					1200	17200
					1200	17600
					1200	18000
					1200	18000
					1200	18400
					1200	19200
					1200	19200
					1200	19200
					1600	20000
					1600	20400
					1600	20400
					1600	20400
					1600	21200
					1600	22400
					1600	22400
					1600	22400
					1600	22800
					1600	23200
					1600	23600
					1600	24000
					1600	24000
					1600	24000
					1600	24400
					1600	25200
					1600	25600
					1600	26000
					1600	26800
					1600	26800
					1600	28000
					1600	28800
					1600	29200
					2000	34800
					2000	39200
					2000	40400
					2000	43600
					2000	48000
					2000	58000
					2000	62400
					2000	62800
					2000	77600
					2000	84800
					2000	87200
					2000	88400
					2000	100800
					2000	400
					2000	400
					2000	400
					2000	400
					2000	400
					2400	400
					2400	400
					2400	800
					2400	800
					2400	800
					2400	800
					2400	800
					2400	800
					2400	800
					2400	800
					2400	800
					2400	800
					2400	800
					2400	800
					2400	800
					2400	800
					2400	800
					2400	800
					2400	800
					2400	1200
					2400	1200
					2400	1200
					2400	1200
					2400	1200
					2400	1200
					2800	1200
					2800	1200
					2800	1200
					2800	1200
					2800	1200
					2800	1200
					2800	1200
					2800	1200
					2800	1200
					2800	1200
					2800	1200
					2800	1200
					2800	1200
					2800	1600
					2800	1600
					2800	1600
					2800	1600
					2800	1600
					2800	1600
					2800	1600
					2800	1600
					2800	1600
					2800	1600
					2800	1600
					2800	1600
					2800	1600
					2800	1600
					2800	1600
					2800	1600
					2800	2000
					2800	2000
					2800	2000
					2800	2000
					2800	2000
					3200	2000
					3200	2000
					3200	2000
					3200	2000
					3200	2000
					3200	2000
					3200	2000
					3200	2000
					3200	2000
					3200	2000
					3200	2000
					3200	2400
					3200	2400
					3200	2400
					3200	2400
					3200	2400
					3200	2400
					3200	2400
					3200	2400
					3200	2400
					3600	2400
					3600	2400
					3600	2400
					3600	2400
					3600	2800
					3600	2800
					3600	2800
					3600	2800
					3600	2800
					3600	2800
					3600	2800
					3600	2800
					3600	2800
					3600	2800
					3600	2800
					3600	2800
					3600	3200
					3600	3200
					3600	3200
					3600	3200
					3600	3200
					3600	3200
					4000	3600
					4000	3600
					4000	3600
					4000	3600
					4000	3600
					4000	3600
					4000	3600
					4000	3600
					4000	3600
					4000	4000
					4000	4000
					4000	4000
					4000	4000
					4400	4000
					4400	4000
					4400	4000
					4400	4400
					4400	4400
					4400	4400
					4400	4400
					4400	4800
					4400	4800
					4400	4800
					4400	4800
					4400	4800
					4400	4800
					4400	4800
					4400	4800
					4400	5200
					4800	5200
					4800	5200
					4800	5200
					4800	5200
					4800	5200
					4800	5600
					4800	6000
					4800	6000
					4800	6000
					5200	6000
					5200	6400
					5200	6400
					5200	6800
					5200	7600
					5200	7600
					5200	8000
					5200	8000
					5200	8000
					5200	8400
					5200	8800
					5200	8800
					5600	9600
					5600	9600
					5600	10000
					5600	10000
					5600	11200
					5600	11200
					5600	11200
					5600	11200
					5600	11600
					5600	12000
					5600	13600
					5600	13600
					5600	20800
					6000	24400
					6000	400
					6000	400
					6000	400
					6000	400
					6000	400
					6000	400
					6000	400
					6000	400
					6000	400
					6000	400
					6400	400
					6400	400
					6400	800
					6400	800
					6400	800
					6400	800
					6800	800
					6800	800
					6800	800
					6800	800
					6800	800
					6800	800
					6800	800
					6800	800
					6800	800
					6800	800
					7200	800
					7200	800
					7200	800
					7600	800
					7600	800
					7600	800
					7600	1200
					7600	1200
					7600	1200
					8000	1200
					8000	1200
[truncated: 3,166 more rows]
