# Supplementary material for: STIM1-dependent peripheral coupling governs the contractility of vascular smooth muscle cells
Source: eLife. 2022 Feb 11;11:e70278. doi: 10.7554/eLife.70278 (PMC8947769; doi:10.7554/eLife.70278)
Supplement: Figure 5—source data 1. [file elife-70278-fig5-data1.xlsx]

## Sheet: Figure 5B
	BK+STIM1	Randomized
Cell 1	2.7178	1.03761
Cell 2	2.8083	1.35823
Cell 3	4.10184	0.615385
Cell 4	3.79253	1.54004
Cell 5	2.77457	1.51134
Cell 6	5.62588	3.17872
Cell 7	3.71747	0.465116
Cell 8	3.31174	1.09308
Cell 9	4.99302	3.12805
Cell 10	4.47077	1.61687
Cell 11	3.02809	2.36167
Paired t test
P value	<0.0001
Significantly different (P < 0.05)?	Yes
One- or two-tailed P value?	Two-tailed
Mean of differences (B - A)	-2.131
SD of differences	0.8588
SEM of differences	0.2589
95% confidence interval	-2.707 to -1.554

## Sheet: Figure 5D
	TRPM4+STIM1	Randomized
Cell 1	2.74725	1.03627
Cell 2	5.35117	3.67762
Cell 3	7.55965	2.96966
Cell 4	6.03614	3.8961
Cell 5	5.07842	2.41477
Cell 6	12.1186	3.76014
Cell 7	7.8728	2.8998
Cell 8	7.37145	2.0657
Cell 9	6.98565	3.92324
Cell 10	6.86797	2.79898
Cell 11	5.73201	2.99388
Cell 12	7.92899	2.015
Cell 13	5.54692	1.52801
Cell 14	5.53657	2.57898
Cell 15	3.08123	1.3312
Cell 16	4.12175	0.829384
Cell 17	3.64495	1.18713
Paired t test
P value	<0.0001
P value summary	****
Significantly different (P < 0.05)?	Yes
One- or two-tailed P value?	Two-tailed
Mean of differences (B - A)	-3.628
SD of differences	1.78
SEM of differences	0.4318
95% confidence interval	-4.543 to -2.713
