# Supplementary material for: STIM1-dependent peripheral coupling governs the contractility of vascular smooth muscle cells
Source: eLife. 2022 Feb 11;11:e70278. doi: 10.7554/eLife.70278 (PMC8947769; doi:10.7554/eLife.70278)
Supplement: Figure 6—source data 1. [file elife-70278-fig6-data1.xlsx]

## Sheet: Figure 6D
Ca2+ Spark Frequency	Control	STIM1 smKO
Spark site 1	0.63	1.2
Spark site 2	0.21	0.63
Spark site 3	0.37	0.3
Spark site 4	0.37	0.7
Spark site 5	0.4	0.99
Spark site 6	1.1	0.94
Spark site 7	1.1	1.2
Spark site 8	0.51	0.91
Spark site 9	0.62	0.84
Spark site 10	0.43	0.56
Spark site 11	0.83	0.28
Spark site 12	0.5	1.1
Spark site 13	2.6	0.48
Spark site 14	1.5	0.26
Spark site 15	1.7	0.24
Spark site 16	0.26	0.19
Spark site 17	0.46	0.07
Spark site 18	0.33	0.51
Spark site 19	0.21	0.5
Spark site 20	0.63	0.2
Spark site 21	0.89	1.5
Spark site 22	0.53	0.6
Spark site 23	1.1	0.46
Spark site 24	0.86	0.6
Spark site 25	0.25	0.53
Spark site 26	0.33	0.75
Spark site 27	0.22	0.6
Spark site 28	0.22	0.3
Spark site 29	0.28	1.3
Spark site 30	0.22	0.7
Spark site 31	0.4	0.8
Spark site 32	0.19	0.2
Spark site 33	0.55	0.1
Spark site 34	0.3	0.3
Spark site 35	0.3	0.27
Spark site 36	0.15	0.09
Spark site 37	0.15	0.18
Spark site 38	0.6	0.72
Spark site 39	0.3	0.72
Spark site 40	0.3	0.72
Spark site 41	0.4	1
Spark site 42	0.3
Spark site 43	0.9
Minimum	0.15	0.07
25% Percentile	0.28	0.275
Median	0.4	0.6
75% Percentile	0.63	0.82
Maximum	2.6	1.5
Mean	0.5698	0.5985
Std. Deviation	0.4774	0.3612
Std. Error of Mean	0.07281	0.05641
Lower 95% CI	0.4228	0.4845
Upper 95% CI	0.7167	0.7125
Unpaired t test
P value	0.7571
Significantly different (P < 0.05)?	No
One- or two-tailed P value?	Two-tailed
Mean of column A	0.5698
Mean of column B	0.5985
Difference between means (B - A) ± SEM	0.02877 ± 0.09271
95% confidence interval	-0.1557 to 0.2132

## Sheet: Figure 6E
Ca2+ Spark Amplitude (delta F/F0)	Control	STIM1 smKO
Spark site 1	0.7	0.7
Spark site 2	1	0.5
Spark site 3	0.4	0.8
Spark site 4	0.5	1
Spark site 5	0.4	0.7
Spark site 6	0.6	0.9
Spark site 7	0.6	0.9
Spark site 8	0.6	0.6
Spark site 9	0.5	0.5
Spark site 10	0.6	0.5
Spark site 11	0.5	0.4
Spark site 12	0.4	0.7
Spark site 13	0.7	0.8
Spark site 14	0.5	0.6
Spark site 15	0.5	0.5
Spark site 16	0.7	0.6
Spark site 17	0.5	0.7
Spark site 18	0.4	0.7
Spark site 19	0.4	0.4
Spark site 20	0.5	0.5
Spark site 21	0.6	0.6
Spark site 22	0.5	0.9
Spark site 23	0.5	0.8
Spark site 24	0.5	0.9
Spark site 25	0.4	0.7
Spark site 26	0.5	0.5
Spark site 27	0.5	1.3
Spark site 28	0.6	1.7
Spark site 29	0.5	1
Spark site 30	0.5	2.3
Spark site 31	0.7	2.4
Spark site 32	0.7	0.6
Spark site 33	0.5	0.7
Spark site 34	0.6	0.6
Spark site 35	0.6	0.9
Spark site 36	1.1	0.8
Spark site 37	0.6	1.3
Spark site 38	0.6	0.7
Spark site 39	0.5	1.1
Spark site 40	0.6	1.4
Spark site 41	0.5	1.7
Spark site 42	0.6
Spark site 43	1.2
Minimum	0.4	0.4
25% Percentile	0.5	0.6
Median	0.5	0.7
75% Percentile	0.6	0.95
Maximum	1.2	2.4
Mean	0.5791	0.8756
Std. Deviation	0.1698	0.4598
Std. Error of Mean	0.0259	0.0718
Lower 95% CI	0.5268	0.7305
Upper 95% CI	0.6313	1.021
Unpaired t test
P value	0.0002
Significantly different (P < 0.05)?	Yes
One- or two-tailed P value?	Two-tailed
Mean of column A	0.5791
Mean of column B	0.8756
Difference between means (B - A) ± SEM	0.2965 ± 0.07495
95% confidence interval	0.1474 to 0.4456

## Sheet: Figure 6F
Ca2+ Spark Spatial spread (µm2)	Control	STIM1 smKO
Spark site 1	6.75	53.91
Spark site 2	11.87	19.19
Spark site 3	11.34	16.1
Spark site 4	21.2	54
Spark site 5	14.49	41.23
Spark site 6	11.05	53.88
Spark site 7	18.76	70.14
Spark site 8	27.2	32
Spark site 9	4.42	7.04
Spark site 10	9.95	32.05
Spark site 11	13.7	21.06
Spark site 12	9.19	46.43
Spark site 13	34.6	24.83
Spark site 14	30.87	11.2
Spark site 15	21	36.58
Spark site 16	6.6	34.7
Spark site 17	15.48	43.8
Spark site 18	5.58	32.3
Spark site 19	8.85	10.26
Spark site 20	5	8.5
Spark site 21	33	31.8
Spark site 22	11.59	30.4
Spark site 23	13.33	10.3
Spark site 24	7.9	17.5
Spark site 25	11.67	17.5
Spark site 26	12.5	52.7
Spark site 27	11.2	25
Spark site 28	7.4	55
Spark site 29	15.3	101
Spark site 30	9.6	39
Spark site 31	26.1	59
Spark site 32	17.8	15
Spark site 33	12.4	4
Spark site 34	3.5	29
Spark site 35	7.5	20.14
Spark site 36	18.4	20.6
Spark site 37	9.9	64
Spark site 38	46	19
Spark site 39	23.8	37
Spark site 40	13.8	6.3
Spark site 41	10.3	51
Spark site 42	10.26
Spark site 43	83
Minimum	3.5	4
25% Percentile	9.19	17.5
Median	11.87	31.8
75% Percentile	18.76	48.72
Maximum	83	101
Mean	16.38	33.04
Std. Deviation	13.76	20.62
Std. Error of Mean	2.098	3.221
Lower 95% CI	12.14	26.53
Upper 95% CI	20.61	39.54
Unpaired t test
P value	<0.0001
Significantly different (P < 0.05)?	Yes
One- or two-tailed P value?	Two-tailed
Mean of column A	16.38
Mean of column B	33.04
Difference between means (B - A) ± SEM	16.66 ± 3.809
95% confidence interval	9.083 to 24.24

## Sheet: Figure 6G
Ca2+ Spark Duration (t1/2) (ms)	Control	STIM1 KO
Spark site 1	49	84
Spark site 2	70	80
Spark site 3	48	68
Spark site 4	77	122
Spark site 5	73	58
Spark site 6	79	73
Spark site 7	81	110
Spark site 8	79	67
Spark site 9	66	70
Spark site 10	55	57
Spark site 11	60	35
Spark site 12	61	108
Spark site 13	63	100
Spark site 14	65	88
Spark site 15	62	100
Spark site 16	78	108
Spark site 17	78	279
Spark site 18	75	169
Spark site 19	90	88
Spark site 20	77	43
Spark site 21	120	74
Spark site 22	62	85
Spark site 23	51	59
Spark site 24	48	79
Spark site 25	65	69
Spark site 26	76	60
Spark site 27	77	80
Spark site 28	48	71
Spark site 29	49	59
Spark site 30	57	64
Spark site 31	56	90
Spark site 32	32	122
Spark site 33	59	91
Spark site 34	107	114
Spark site 35	78	107
Spark site 36	94	144
Spark site 37	84	155
Spark site 38	114	106
Spark site 39	53	90
Spark site 40	57	87
Spark site 41	73	127
Spark site 42	56
Spark site 43	112
Minimum	32	35
25% Percentile	56	68.5
Median	66	87
75% Percentile	78	108
Maximum	120	279
Mean	70.09	93.66
Std. Deviation	19.13	41.34
Std. Error of Mean	2.917	6.456
Lower 95% CI	64.21	80.61
Upper 95% CI	75.98	106.7
Unpaired t test
P value	0.0011
Significantly different (P < 0.05)?	Yes
One- or two-tailed P value?	Two-tailed
Mean of column A	70.09
Mean of column B	93.66
Difference between means (B - A) ± SEM	23.57 ± 6.974
95% confidence interval	9.691 to 37.44

## Sheet: Figure 6H
Ca2+ Spark Rise Time (t1/2) (ms)	Control	STIM1 KO
Spark site 1	26	41
Spark site 2	60	49
Spark site 3	43	33
Spark site 4	42	42
Spark site 5	38	33
Spark site 6	47	31
Spark site 7	40	41
Spark site 8	42	36
Spark site 9	39	37
Spark site 10	39	36
Spark site 11	31	23
Spark site 12	38	52
Spark site 13	33	51
Spark site 14	33	57
Spark site 15	36	55
Spark site 16	36	47
Spark site 17	52	59
Spark site 18	38	52
Spark site 19	45	35
Spark site 20	35	41
Spark site 21	43	41
Spark site 22	51	32
Spark site 23	33	38
Spark site 24	28	34
Spark site 25	33	38
Spark site 26	28	41
Spark site 27	38	31
Spark site 28	41	35
Spark site 29	54	50
Spark site 30	40	52
Spark site 31	35	48
Spark site 32	22	48
Spark site 33	35	45
Spark site 34	57	55
Spark site 35	55	52
Spark site 36	48	52
Spark site 37	47	56
Spark site 38	52	52
Spark site 39	52	51
Spark site 40	39	62
Spark site 41	43	47
Spark site 42	34
Spark site 43	31
Minimum	22	23
25% Percentile	34	36
Median	39	45
75% Percentile	47	52
Maximum	60	62
Mean	40.28	44.17
Std. Deviation	8.743	9.249
Std. Error of Mean	1.333	1.444
Lower 95% CI	37.59	41.25
Upper 95% CI	42.97	47.09
Unpaired t test
P value	0.0508
Significantly different (P < 0.05)?	No
One- or two-tailed P value?	Two-tailed
Mean of column A	40.28
Mean of column B	44.17
Difference between means (B - A) ± SEM	3.892 ± 1.963
95% confidence interval	-0.01358 to 7.797

## Sheet: Figure 6I
Ca2+ Spark Decay (t1/2) (ms)	Control	STIM1 KO
Spark site 1	33	52
Spark site 2	47	50
Spark site 3	28	50
Spark site 4	52	87
Spark site 5	44	37
Spark site 6	49	51
Spark site 7	56	78
Spark site 8	51	44
Spark site 9	40	48
Spark site 10	37	35
Spark site 11	39	20
Spark site 12	29	65
Spark site 13	40	56
Spark site 14	42	45
Spark site 15	40	64
Spark site 16	54	71
Spark site 17	33	231
Spark site 18	47	126
Spark site 19	59	66
Spark site 20	49	21
Spark site 21	85	50
Spark site 22	38	63
Spark site 23	31	34
Spark site 24	26	57
Spark site 25	55	43
Spark site 26	40	30
Spark site 27	42	54
Spark site 28	27	42
Spark site 29	30	29
Spark site 30	35	36
Spark site 31	32	61
Spark site 32	17	90
Spark site 33	33	68
Spark site 34	71	64
Spark site 35	45	63
Spark site 36	68	109
Spark site 37	60	113
Spark site 38	74	67
Spark site 39	33	53
Spark site 40	27	36
Spark site 41	40	84
Spark site 42	39
Spark site 43	86
Minimum	17	20
25% Percentile	33	42.5
Median	40	54
75% Percentile	52	67.5
Maximum	86	231
Mean	44.26	62.02
Std. Deviation	15.5	35.8
Std. Error of Mean	2.363	5.591
Lower 95% CI	39.49	50.72
Upper 95% CI	49.02	73.32
Unpaired t test
P value	0.0038
Significantly different (P < 0.05)?	Yes
One- or two-tailed P value?	Two-tailed
Mean of column A	44.26
Mean of column B	62.02
Difference between means (B - A) ± SEM	17.77 ± 5.971
95% confidence interval	5.891 to 29.65

## Sheet: Figure 6J
SR Ca2+ (ΔF/F0)	Control	STIM1 smKO
Cell 1	4.1	1.01
Cell 2	2.56	7.4
Cell 3	1.2	2.1
Cell 4	5.7	2.4
Cell 5	2.4	1.6
Cell 6	3.7	4.5
Cell 7	3	4.9
Cell 8	3.8	1.9
Minimum	1.2	1.01
25% Percentile	2.44	1.675
Median	3.35	2.25
75% Percentile	4.025	4.8
Maximum	5.7	7.4
Mean	3.308	3.226
Std. Deviation	1.345	2.175
Std. Error of Mean	0.4756	0.7689
Lower 95% CI	2.183	1.408
Upper 95% CI	4.432	5.044
Unpaired t test
P value	0.9297
Significantly different (P < 0.05)?	No
One- or two-tailed P value?	Two-tailed
Mean of column A	3.308
Mean of column B	3.226
Difference between means (B - A) ± SEM	-0.08125 ± 0.9041
95% confidence interval	-2.020 to 1.858
