# Supplementary material for: STIM1-dependent peripheral coupling governs the contractility of vascular smooth muscle cells
Source: eLife. 2022 Feb 11;11:e70278. doi: 10.7554/eLife.70278 (PMC8947769; doi:10.7554/eLife.70278)
Supplement: Figure 7—figure supplement 1—source data 1. [file elife-70278-fig7-figsupp1-data1.xlsx]

## Sheet: Supplementary Figure 1A
Gene expression	Pial Kcnma1			Pial Kcnmb1			Pial RyR2
	Control	Stim1 smKO		Control	Stim1 smKO		Control	Stim1 smKO
Mouse 1	9.10781	10.4724		109.166	211.456		1.95999	1.93648
Mouse 2	23.8496	29.4243		144.703	107.565		5.41902	7.68775
Mouse 3	25.2097	28.6425		118.672	78.3937		7.85502	6.68317
Minimum	9.108	10.47		109.2	78.39		1.96	1.936
25% Percentile	9.108	10.47		109.2	78.39		1.96	1.936
Median	23.85	28.64		118.7	107.6		5.419	6.683
75% Percentile	25.21	29.42		144.7	211.5		7.855	7.688
Maximum	25.21	29.42		144.7	211.5		7.855	7.688
Mean	19.39	22.85		124.2	132.5		5.078	5.436
Std. Deviation	8.93	10.72		18.4	69.94		2.962	3.072
Std. Error of Mean	5.156	6.191		10.62	40.38		1.71	1.774
Lower 95% CI	-2.794	-3.792		78.48	-41.27		-2.281	-2.195
Upper 95% CI	41.57	49.48		169.9	306.2		12.44	13.07
P value	0.6899			0.8523			0.8916
Significantly different (P < 0.05)?	No			No			No
One- or two-tailed P value?	Two-tailed			Two-tailed			Two-tailed
Mean of column A	19.39			124.2			5.078
Mean of column B	22.85			132.5			5.436
Difference between means (B - A) ± SEM	3.457 ± 8.057			8.291 ± 41.75			0.3578 ± 2.464
95% confidence interval	-18.91 to 25.83			-107.6 to 124.2			-6.483 to 7.198

## Sheet: Supplementary Figure 1C
	Control	Synta 66
Cell 1	14.438	14.438
Cell 2	15.958	12.192
Cell 3	11.89	10.08
Cell 4	15.7778	10.724
Cell 5	11.25	14.207
Cell 6	9.642	14.0308
Cell 7	17.89	16.3973
Unpaired t test
P value	0.637
P value summary	ns
Significantly different (P < 0.05)?	No
One- or two-tailed P value?	Two-tailed
Mean of column A	13.84
Mean of column B	13.15
Difference between means (B - A) ± SEM	-0.6824 ± 1.410
95% confidence interval	-3.754 to 2.389

## Sheet: Supplementary Figure 1D
	Control	Synta 66
Cell 1	1.17857	2.82143
Cell 2	2.85714	2.46429
Cell 3	4.91071	3.125
Cell 4	4.05357	2.42857
Cell 5	0.785714	0.678571
Cell 6	1.82143	2.23214
Cell 7	4.5712	3.67857
Unpaired t test
P value	0.5976
P value summary	ns
Significantly different (P < 0.05)?	No
One- or two-tailed P value?	Two-tailed
Mean of column A	2.883
Mean of column B	2.49
Difference between means (B - A) ± SEM	-0.3928 ± 0.7244
95% confidence interval	-1.971 to 1.186
