# Supplementary material for: STIM1-dependent peripheral coupling governs the contractility of vascular smooth muscle cells
Source: eLife. 2022 Feb 11;11:e70278. doi: 10.7554/eLife.70278 (PMC8947769; doi:10.7554/eLife.70278)
Supplement: Figure 7—figure supplement 2—source data 1. [file elife-70278-fig7-figsupp2-data1.xlsx]

## Sheet: Supplementary Figure 2A
Gene expression	Pial Trpm4			Pial Itpr1			Pial Itpr2			Pial Itpr3
	Control	Stim1 smKO		Control	Stim1 smKO		Control	Stim1 smKO		Control	Stim1 smKO
Mouse 1	5.61647	4.5808		36.9689	33.4126		80.1503	53.5268		21.3518	13.318
Mouse 2	11.3733	14.3403		109.154	127.661		147.734	117.249		49.3058	44.6554
Mouse 3	8.12127	17.2967		92.0445	137.309		67.1196	154.34		39.1067	61.8732
Minimum	5.616	4.581		36.97	33.41		67.12	53.53		21.35	13.32
25% Percentile	5.616	4.581		36.97	33.41		67.12	53.53		21.35	13.32
Median	8.121	14.34		92.04	127.7		80.15	117.2		39.11	44.66
75% Percentile	11.37	17.3		109.2	137.3		147.7	154.3		49.31	61.87
Maximum	11.37	17.3		109.2	137.3		147.7	154.3		49.31	61.87
Mean	8.37	12.07		79.39	99.46		98.33	108.4		36.59	39.95
Std. Deviation	2.886	6.654		37.72	57.4		43.27	50.99		14.15	24.62
Std. Error of Mean	1.667	3.842		21.78	33.14		24.98	29.44		8.167	14.21
Lower 95% CI	1.2	-4.458		-14.31	-43.14		-9.165	-18.29		1.447	-21.2
Upper 95% CI	15.54	28.6		173.1	242.1		205.8	235		71.73	101.1
P value	0.4266			0.6394			0.8077			0.8476
Significantly different (P < 0.05)?	No			No			No			No
One- or two-tailed P value?	Two-tailed			Two-tailed			Two-tailed			Two-tailed
Mean of column A	8.37			79.39			98.33			36.59
Mean of column B	12.07			99.46			108.4			39.95
Difference between means (B - A) ± SEM	3.702 ± 4.188			20.07 ± 39.66			10.04 ± 38.61			3.361 ± 16.39
95% confidence interval	-7.925 to 15.33			-90.03 to 130.2			-97.17 to 117.2			-42.15 to 48.87

## Sheet: Supplementary Figure 2C
	Control	Synta 66
Cell 1	1.35842	1.45674
Cell 2	1.25201	1.03641
Cell 3	1.59797	1.90638
Cell 4	2.37423	2.1503
Cell 5	1.8587	2.29435
Cell 6	1.3153	1.8448
Unpaired t test
P value	0.5609
P value summary	ns
Significantly different (P < 0.05)?	No
One- or two-tailed P value?	Two-tailed
Mean of column A	1.626
Mean of column B	1.781
Difference between means (B - A) ± SEM	0.1554 ± 0.2583
95% confidence interval	-0.4202 to 0.7310
