# Supplementary material for: STIM1-dependent peripheral coupling governs the contractility of vascular smooth muscle cells
Source: eLife. 2022 Feb 11;11:e70278. doi: 10.7554/eLife.70278 (PMC8947769; doi:10.7554/eLife.70278)
Supplement: Figure 7—source data 1. [file elife-70278-fig7-data1.xlsx]

## Sheet: Figure 7B
STOC Frequency (Hz)						Control																	Stim1 smKO
	Voltage (mV)	Cell 1	Cell 2	Cell 3	Cell 4	Cell 5	Cell 6	Cell 7	Cell 8	Cell 9	Cell 10	Cell 11	Cell 12	Cell 13		Cell 1	Cell 2	Cell 3	Cell 4	Cell 5	Cell 6	Cell 7	Cell 8	Cell 9	Cell 10	Cell 11	Cell 12	Cell 13	Cell 14	Cell 15	Cell 16	Cell 17
	-60	0	0	0.275862	0	0	0.137931	0	0.206897	4.24138	0	0.172414	0	0		0	0	0	0	0	0	0	0	0	0	0	0	0	0	0	0	0
	-50	0	0.172414	0.551724	0.034483	0.137931	0.551724	0	1.55172	2.34483	0.241379	9.51724	0.586207	0.275862		0	0	0	0	0	0	0	0.344828	0	0.655172	0	0	0.068966	0	0	0.206897	0
	-40	0.62069	1.13793	1.03448	2	0.724138	0.827586	0.896552	3.24138	3.96552	1.89655	6.72414	7	1.55172		0	0	0.068966	0	0	0.448276	0	1.55172	0	3.7931	0	1.41379	0.068966	0.275862	0	2.51724	0
	-30	0.689655	3.65517	0.62069	2.41379	1.24138	3.96552	1.58621	5.06897	4.34483	3	3.58621	6.7931	1.51724		0.068966	0.034483	0.896552	0.034483	0.034483	0.862069	1.17241	3.31034	0.310345	4.10345	2.13793	5.51724	0	1.17241	0.206897	1.93103	0.344828
	-20	0.689655	4.51724	1.10345	2.62069	3.24138	2.10345	0.793103	2	2.72414	3.55172	7.2069	3.48276	1.10345		0.034483	0.172414	1.17241	0	0.206897	2	1.89655	3.62069	0.482759	2.10345	3.65517	5.34483	0.103448	1.27586	0.172414	0.413793	0.344828
	-10	2.2069	3.06897	0.413793	0.655172	2.65517	2.65517	2.89655	3.86207	3.24138	2.41379	4.37931	3.06897	1		0.034483	0.103448	1.34483	0.172414	0.206897	0.172414	1.03448	5.44828	1.06897	1.44828	2.68966	4.44828	0	5.48276	1.27586	0.37931	0.344828
	0	1.68965	2.93103	2.2069	1.06897	3.62069	0.37931	1.48276	4.13793	5.75862	2.2069	6.13793	4.96552	2.75862		0.448276	0.206897	0	0.275862	0.482759	2.62069	2.06897	3.34483	1.37931	0.758621	3.24138	7.86207	0.241379	0.413793	1.34483	1.37931	0.931034
Two-way RM ANOVA
Alpha	0.05
Source of Variation	% of total variation	P value	Significant?
Row Factor x Column Factor	1.42	0.3165	No
Row Factor	16.51	<0.0001	Yes
Column Factor	11.46	0.0068	Yes

## Sheet: Figure 7C
STOC Amplitude (pA)						Control																	Stim1 smKO
	Voltage (mV)	Cell 1	Cell 2	Cell 3	Cell 4	Cell 5	Cell 6	Cell 7	Cell 8	Cell 9	Cell 10	Cell 11	Cell 12	Cell 13		Cell 1	Cell 2	Cell 3	Cell 4	Cell 5	Cell 6	Cell 7	Cell 8	Cell 9	Cell 10	Cell 11	Cell 12	Cell 13	Cell 14	Cell 15	Cell 16	Cell 17
	-60	0	0	15.999	0	0	10.458	0	16.204	11.21	0	13.8	0	0		0	0	0	0	0	0	0	0	0	0	0	0	0	0	0	0	0
	-50	0	11.425	24.86	10.31	10.66	22.64	0	22.729	20.38	11.79	14.78	11.52	10.25		0	0	0	0	0	0	0	10.88	0	10.914	0	0	10.102	0	0	10.02	0
	-40	13.261	12.0808	46.94	15.053	14.36	48.29	12.88	22.67	34.28	13.158	25.58	11.78	14.001		0	0	10.04	0	0	10.74	0	15.33	0	13.78	0	11.028	11.88	13.932	0	12.34	0
	-30	23.7	15.8524	71.565	18.35	33.88	56.811	16.519	36.03	49.68	16.65	38.35	13.721	20.645		11.39	23.214	10.56	10.46	27.35	11.987	13.09	19.38	15.95	16.91	12.78	13.261	0	14.74	12.21	16.814	11.72
	-20	37.356	27.44	101.67	28.69	42.97	87.88	30.712	57.508	94.125	23.45	52.25	29.78	41.212		27.55	15.955	16.45	0	26.87	19.915	19.912	32.58	23.85	34.714	20.99	20.044	18.99	25.31	18.37	21.47	20.23
	-10	73.0925	50.415	164.45	43.879	51.46	124.14	41.892	68.547	125.12	32.02	82.98	38.69	35.898		43.66	21.433	22.989	22.38	71.522	26.054	29.28	39.98	52.47	60.78	38.698	29.32	0	22.165	25	26.36	26.63
	0	101.33	64.6722	122.078	61.524	64.97	159.9	47.258	33.258	124.32	28.12	74.76	44.545	17.089		33.102	45.97	0	26.78	60.758	44.21	35.723	69.78	67.36	54.65	48.478	36.78	35.08	26.335	29.98	26.34	34.98
Two-way RM ANOVA
Alpha	0.05
Source of Variation	% of total variation	P value	Significant?
Row Factor x Column Factor	3.807	<0.0001	Yes
Row Factor	45.33	<0.0001	Yes
Column Factor	13.4	0.0004	Yes

## Sheet: Figure 7E
Whole-cell BK currents (pA/pF)						Control						Stim1 smKO
	Voltage (mV)	Cell 1	Cell 2	Cell 3	Cell 4	Cell 5	Cell 6		Cell 1	Cell 2	Cell 3	Cell 4	Cell 5	Cell 6	Cell 7
	-100	-1.24055	-6.84223	-0.07859	-0.08507	-0.16447	-0.41307		-6.02527	-0.53497	0.032581	-0.94139	-2.14986	-0.17539	-1.74386
	-80	-1.06687	-5.40113	-0.06549	-0.24457	-0.19438	-0.56177		-4.63912	-0.41339	0	-0.73449	-1.56258	-0.17539	-1.26999
	-60	-0.42179	-3.51194	0.039293	-0.0319	0.029905	-0.5783		-3.23062	-0.92404	0.01086	-0.43449	-1.18505	-0.07016	-2.48311
	-40	0.843575	-2.22827	0	-0.0638	0.089714	-0.38002		-2.12393	-0.38907	0.130324	-0.33104	-0.60825	0.023385	-0.871931
	-20	11.289	3.35451	-0.14407	0.106333	-0.16447	-0.2148		3.06294	0.170218	0.456135	0.02069	0.776048	0.09354	0.26537
	0	38.6804	39.9393	-1.78128	-0.90383	-0.71771	0.330456		38.0743	1.13073	2.08519	0.486212	8.44215	2.30343	0.796111
	20	75.5744	100.248	0.929935	6.19921	2.88579	5.02293		93.9226	10.9669	11.8161	9.19665	28.2628	12.1486	9.42064
	40	122.653	167.762	29.5091	32.07	26.3758	28.1383		156.869	61.3877	37.8374	43.7798	66.6248	31.5816	41.9285
	60	181.145	233.569	84.1526	88.5222	78.8583	86.662		218.296	123.566	108.267	104.07	110.472	70.167	110.508
	80	234.067	292.303	154.487	168.272	136.544	158.767		270.768	203.301	199.233	189.033	162.184	99.7141	202.402
	100	280.836	339.242	239.779	259.803	175.764	263.786		315.382	282.658	311.692	308.052	218.059	109.08	292.836
Two-way RM ANOVA
Alpha	0.05
Source of Variation	% of total variation	P value	Significant?
Row Factor x Column Factor	0.02118	>0.9999	No
Row Factor	86.12	<0.0001	Yes
Column Factor	0.01186	0.878	No

## Sheet: Figure 7G
TICC Activity (NPO)	Control	STIM1 smKO
Cell 1	0.618299	0.867805
Cell 2	1.39293	0.55775
Cell 3	0.545295	0.075391
Cell 4	0.408785	0.09995
Cell 5	0.438895	0.054705
Cell 6	0.481789	0.692466
Cell 7	1.01192	0.829797
Cell 8	0.662065	0.63066
Cell 9	0.596091	0.139575
Cell 10	0.675041	0.098593
Cell 11	2.022	0.700143
Cell 12		0.352462
Cell 13		0.356074
Cell 14		0.239614
Cell 15		1.147
Minimum	0.4088	0.05471
25% Percentile	0.4818	0.09995
Median	0.6183	0.3561
75% Percentile	1.012	0.7001
Maximum	2.022	1.147
Mean	0.8048	0.4561
Std. Deviation	0.4948	0.3455
Std. Error of Mean	0.1492	0.08921
Lower 95% CI	0.4724	0.2648
Upper 95% CI	1.137	0.6475
Unpaired t test
P value	0.0445
Significantly different (P < 0.05)?	Yes
One- or two-tailed P value?	Two-tailed
Mean of column A	0.8048
Mean of column B	0.4561
Difference between means (B - A) ± SEM	-0.3487 ± 0.1645
95% confidence interval	-0.6881 to -0.009264

## Sheet: Figure 7H
TICC Amplitude (pA)	Control	STIM1 smKO
Cell 1	-2.608	-2.0022
Cell 2	-2.361	-2.55
Cell 3	-2.558	-2.295
Cell 4	-2.344	-2.539
Cell 5	-5.038	-2.198
Cell 6	-3.245	-3.113
Cell 7	-3.199	-2.7129
Cell 8	-2.913	-2.09316
Cell 9	-2.377	-2.1102
Cell 10	-2.882	-2.2214
Cell 11	-4.355	-2.367
Cell 12		-1.992
Cell 13		-2.232
Cell 14		-2.02
Cell 15		-2.461
Minimum	-5.038	-3.113
25% Percentile	-3.245	-2.539
Median	-2.882	-2.232
75% Percentile	-2.377	-2.093
Maximum	-2.344	-1.992
Mean	-3.08	-2.327
Std. Deviation	0.8727	0.3085
Std. Error of Mean	0.2631	0.07966
Lower 95% CI	-3.666	-2.498
Upper 95% CI	-2.494	-2.156
Unpaired t test
P value	0.0048
Significantly different (P < 0.05)?	Yes
One- or two-tailed P value?	Two-tailed
Mean of column A	-3.08
Mean of column B	-2.327
Difference between means (B - A) ± SEM	0.7529 ± 0.2424
95% confidence interval	0.2526 to 1.253

## Sheet: Figure 7J
Whole cell TRPM4 current (pA/pF)	Control	STIM1 smKO
Cell 1	2.40772	2.69963
Cell 2	2.23913	2.74141
Cell 3	4.26822	5.52318
Cell 4	2.91455	2.3962
Cell 5	4.34447	2.95557
Minimum	2.239	2.396
25% Percentile	2.323	2.548
Median	2.915	2.741
75% Percentile	4.306	4.239
Maximum	4.344	5.523
Mean	3.235	3.263
Std. Deviation	1.01	1.279
Std. Error of Mean	0.4515	0.572
Lower 95% CI	1.981	1.675
Upper 95% CI	4.488	4.851
Unpaired t test
P value	0.9699
Significantly different (P < 0.05)?	No
One- or two-tailed P value?	Two-tailed
Mean of column A	3.235
Mean of column B	3.263
Difference between means (B - A) ± SEM	0.02838 ± 0.7287
95% confidence interval	-1.652 to 1.709
