# Supplementary material for: STIM1-dependent peripheral coupling governs the contractility of vascular smooth muscle cells
Source: eLife. 2022 Feb 11;11:e70278. doi: 10.7554/eLife.70278 (PMC8947769; doi:10.7554/eLife.70278)
Supplement: Figure 8—figure supplement 1—source data 1. [file elife-70278-fig8-figsupp1-data1.xlsx]

## Sheet: Supplementary Figure 1B
	60 mmHg							+ Pax (1 µM)
Control	21.734	18.1954	20.1413	25.8242	16.4668	15.8446		41.1532	31.9959	28.0219	37.3032	40.6978	31.5423
Stim1 smKO	4.5924	4.77811	5.61424	3.7361	6.16263	5.34527		12.7733	9.08536	12.7842	10.7673	18.5292	8.82691
Two-way ANOVA	Ordinary
Alpha	0.05
Source of Variation	% of total variation	P value	P value summary	Significant?
Interaction	3.179	0.0133	*	Yes
Row Factor	64.98	<0.0001	****	Yes
Column Factor	23.22	<0.0001	****	Yes
Tukey's multiple comparisons test	Mean Diff.	95.00% CI of diff.	Below threshold?	Summary	Adjusted P Value
Control:60 mmHg vs. Control:+ Pax (1 µM)	-15.42	-21.49 to -9.349	Yes	****	<0.0001
Control:60 mmHg vs. Stim1 smKO:60 mmHg	14.66	8.594 to 20.73	Yes	****	<0.0001
Control:60 mmHg vs. Stim1 smKO:+ Pax (1 µM)	7.573	1.504 to 13.64	Yes	*	0.0113
Control:+ Pax (1 µM) vs. Stim1 smKO:60 mmHg	30.08	24.01 to 36.15	Yes	****	<0.0001
Control:+ Pax (1 µM) vs. Stim1 smKO:+ Pax (1 µM)	22.99	16.92 to 29.06	Yes	****	<0.0001
Stim1 smKO:60 mmHg vs. Stim1 smKO:+ Pax (1 µM)	-7.09	-13.16 to -1.020	Yes	*	0.0185

## Sheet: Supplementary Figure 1D
	60 mmHg							+ 9-Phen (30 µM)
Control	16.8421	29.1225	26.5209	20.6682	24.8675	14.9646		0.485028	1.74898	0.855822	0.306941	2.02799	0.81147
Stim1 smKO	6.6156	4.82307	7.9325	5.74843	5.9813	5.94391		0.797305	1.17824	0.84286	0.332316	0.620297	1.60424
Two-way ANOVA	Ordinary
Alpha	0.05
Source of Variation	% of total variation	P value	P value summary	Significant?
Interaction	19.04	<0.0001	****	Yes
Row Factor	19.73	<0.0001	****	Yes
Column Factor	52.85	<0.0001	****	Yes
ANOVA table	SS	DF	MS	F (DFn, DFd)	P value
Interaction	376.7	1	376.7	F (1, 20) = 45.41	P<0.0001
Row Factor	390.4	1	390.4	F (1, 20) = 47.07	P<0.0001
Column Factor	1046	1	1046	F (1, 20) = 126.1	P<0.0001
Residual	165.9	20	8.294
Tukey's multiple comparisons test	Mean Diff.	95.00% CI of diff.	Below threshold?	Summary	Adjusted P Value
Control:60 mmHg vs. Control:+ 9-Phen (30 µM)	21.12	16.47 to 25.78	Yes	****	<0.0001
Control:60 mmHg vs. Stim1 smKO:60 mmHg	15.99	11.34 to 20.64	Yes	****	<0.0001
Control:60 mmHg vs. Stim1 smKO:+ 9-Phen (30 µM)	21.27	16.61 to 25.92	Yes	****	<0.0001
Control:+ 9-Phen (30 µM) vs. Stim1 smKO:60 mmHg	-5.135	-9.789 to -0.4808	Yes	*	0.0273
Control:+ 9-Phen (30 µM) vs. Stim1 smKO:+ 9-Phen (30 µM)	0.1435	-4.510 to 4.797	No	ns	0.9998
Stim1 smKO:60 mmHg vs. Stim1 smKO:+ 9-Phen (30 µM)	5.278	0.6243 to 9.932	Yes	*	0.0227

## Sheet: Supplementary Figure 1E
	Control	+ Synta66 (10 µM)
Vessel 1	74.3325	74.8819
Vessel 2	63.1497	67.5594
Vessel 3	56.4847	61.5057
Vessel 4	47.1388	39.7176
Vessel 5	69.8836	63.929
Vessel 6	49.3612	45.3067
Paired t test
P value	0.5937
P value summary	ns
Significantly different (P < 0.05)?	No
One- or two-tailed P value?	Two-tailed
Mean of differences (B - A)	-1.242
SD of differences	5.342
SEM of differences	2.181
95% confidence interval	-6.848 to 4.364

## Sheet: Supplementary Figure 1G
Intraluminal Pressure (mmHg)	Control							+ Synta66 (10 µM)
	Vessel 1	Vessel 2	Vessel 3	Vessel 4	Vessel 5	Vessel 6		Vessel 1	Vessel 2	Vessel 3	Vessel 4	Vessel 5	Vessel 6
5	6.9819	-0.230574	1.72384	-1.16354	3.31431	3.71359		3.89494	-0.0453885	3.11278	2.74498	3.64322	3.57286
20	3.97118	5.90918	4.78106	7.97787	2.67098	14.3719		2.5473	2.81126	5.9505	8.28689	6.79635	9.7823
40	24.7345	11.4434	21.7556	12.7753	-1.74969	15.2016		23.895	11.2719	19.0059	13.2198	2.70132	9.63821
60	25.0877	15.7711	16.3812	17.105	10.8135	22.8084		28.1541	12.877	27.014	10.6679	5.53424	19.7009
80	24.088	19.2995	27.772	23.3843	13.6202	28.1541		28.0182	19.0196	19.3894	20.5278	13.7209	25.2023
100	28.7389	22.0345	23.5629	25.6167	19.1873	28.8279		28.277	18.2905	18.3643	19.1688	20.1031	28.7096
120	27.7126	22.267	19.9096	25.3361	19.3418	31.2102		30.2986	23.9896	22.6792	22.5699	22.7838	32.6451
140	24.7403	23.1462	22.7067	24.1164	18.5076	28.0028		28.3509	25.2475	25.0528	21.4992	22.3153	32.365
2-way ANOVA
Source of Variation	% of total variation	P value	P value summary	Significant?
Pressure x Synta66 Treatment	0.6244	0.8371	ns	No
Pressure	73.01	<0.0001	****	Yes
Synta66 treatment	0.0177	0.9116	ns	No
