# Supplementary material for: STIM1-dependent peripheral coupling governs the contractility of vascular smooth muscle cells
Source: eLife. 2022 Feb 11;11:e70278. doi: 10.7554/eLife.70278 (PMC8947769; doi:10.7554/eLife.70278)
Supplement: Figure 8—source data 1. [file elife-70278-fig8-data1.xlsx]

## Sheet: Figure 8A
Pial KCl response	Control	Stim1 smKO
Vessel 1	45.9356	47.5307
Vessel 2	50.4185	43.8679
Vessel 3	38.8592	54.3557
Vessel 4	41.9327	67.4403
Vessel 5	56.1351	61.3364
Vessel 6	51.1226	46.5191
Vessel 7	57.9885	54.3922
Vessel 8	48.7726	39.5227
Vessel 9	69.0189	63.3497
Vessel 10	61.9875	72.9524
Vessel 11	46.6547	67.2875
Vessel 12	74.8406	59.8937
Minimum	38.86	39.52
25% Percentile	46.12	46.77
Median	50.77	57.14
75% Percentile	60.99	66.3
Maximum	74.84	72.95
Mean	53.64	56.54
Std. Deviation	10.81	10.55
Std. Error of Mean	3.12	3.047
Lower 95% CI	46.77	49.83
Upper 95% CI	60.51	63.24
Unpaired t test
P value	0.5132
Significantly different (P < 0.05)?	No
One- or two-tailed P value?	Two-tailed
Mean of column A	53.64
Mean of column B	56.54
Difference between means (B - A) ± SEM	2.898 ± 4.361
95% confidence interval	-6.146 to 11.94

## Sheet: Figure 8C
Pial Myogenic Reactivity				Control							Stim1 smKO
	Intraluminal pressure (mmHg)	Vessel 1	Vessel 2	Vessel 3	Vessel 4	Vessel 5	Vessel 6		Vessel 1	Vessel 2	Vessel 3	Vessel 4	Vessel 5	Vessel 6
	5	-1.0123	4.48508	0.221428	1.78401	7.77621	-5.6598		-0.247677	-0.607344	0.867941	0.554885	1.14578	0.237485
	20	3.05839	2.52229	7.51268	5.23143	10.4976	2.30757		7.13108	2.44084	3.122	-0.690149	3.59431	4.02836
	40	13.118	4.91319	9.39801	8.02726	14.325	8.31692		7.73191	5.93413	3.50826	4.25692	3.92758	8.00682
	60	11.9993	13.2332	13.7799	20.289	13.9153	17.163		8.02662	5.66054	7.52194	7.35897	4.25258	6.28647
	80	17.1215	30.4221	20.5104	25.2382	14.8467	22.2648		6.24477	5.47052	7.41391	12.913	6.99305	6.42371
	100	22.152	33.0551	23.4043	22.0061	15.7871	19.8932		5.62605	6.07289	7.11784	9.94756	6.69938	5.44139
	120	23.9991	22.0613	22.0626	20.0981	17.3781	20.0326		5.13366	5.43988	8.37435	7.32954	6.18025	5.04218
	140	26.283	16.4242	24.297	21.3229	16.0317	20.1567		5.14778	5.66477	7.13908	4.28049	6.41071	5.01931
Two-way RM ANOVA
Alpha	0.05
Source of Variation	% of total variation	P value	Significant?
Row x Column Factor	13.84	<0.0001	Yes
Row Factor	37.66	<0.0001	Yes
Column Factor	34.91	<0.0001	Yes

## Sheet: Figure 8E
Pial U46619 CRC				Control							Stim1 smKO
	log [U46619] (M)	Vessel 1	Vessel 2	Vessel 3	Vessel 4	Vessel 5	Vessel 6		Vessel 1	Vessel 2	Vessel 3	Vessel 4	Vessel 5	Vessel 6
	-10	-0.372384	-0.658771	-0.765679	-0.0174663	-0.838241	-0.303256		0.170393	-0.713469	-0.197823	0.717915	0.352266	0.0571669
	-9.5	-0.252631	-1.05033	-0.941147	-0.0637521	-1.22643	-0.0426303		0.463365	-0.836382	-0.280469	0.821235	1.04393	-0.252001
	-9	-0.115652	-0.840118	-1.04777	-0.179903	-1.21255	-0.729559		0.460757	-1.063	-0.0325309	0.327003	0.476944	-0.625335
	-8.5	1.20492	2.06144	-1.04693	-0.635775	-0.168532	3.05872		0.587683	-1.0726	-0.0958343	1.53808	0.78963	2.73118
	-8	15.5311	17.1503	6.9927	3.05399	8.2284	19.3367		1.93605	14.7399	8.40352	10.3309	1.4714	0.850503
	-7.5	35.1436	27.7742	21.1376	6.23199	19.787	31.1841		10.0167	18.2276	18.147	20.0302	4.50327	21.8261
	-7	45.9575	41.6062	58.0228	16.9371	34.2801	55.5899		24.1098	22.4882	21.131	29.3919	5.81239	16.4477
	-6.5	49.6854	41.097	66.468	61.3339	43.4749	63.3932		22.2459	21.2332	20.7494	37.2219	16.9939	15.0396
	-6	46.5399	38.131	69.9673	57.9393	46.1651	65.2001		23.2656	18.2372	20.3002	36.8278	20.9875	10.1582
Two-way RM ANOVA
Alpha	0.05
Source of Variation	% of total variation	P value	Significant?
Row x Column Factor	11.93	<0.0001	Yes
Row Factor	68.33	<0.0001	Yes
Column Factor	8.031	0.0005	Yes

## Sheet: Figure 8F
Mes KCl response	Control	Stim1 smKO
Vessel 1	57.1278	60.6501
Vessel 2	50.8352	83.8312
Vessel 3	90.6947	57.0304
Vessel 4	43.2818	47.0608
Vessel 5	52.8733	52.7838
Vessel 6	43.4329	60.7651
Vessel 7	50.4482	47.1799
Vessel 8	46.1344	57.4031
Vessel 9	78.6459	59.0872
Vessel 10	66.7676	58.8085
Vessel 11	41.5867	52.3667
Vessel 12	70.1473	72.7084
Minimum	41.59	47.06
25% Percentile	44.11	52.47
Median	51.85	58.11
75% Percentile	69.3	60.74
Maximum	90.69	83.83
Mean	57.66	59.14
Std. Deviation	15.65	10.36
Std. Error of Mean	4.517	2.992
Lower 95% CI	47.72	52.55
Upper 95% CI	67.61	65.72
Unpaired t test
P value	0.788
Significantly different (P < 0.05)?	No
One- or two-tailed P value?	Two-tailed
Mean of column A	57.66
Mean of column B	59.14
Difference between means (B - A) ± SEM	1.475 ± 5.418
95% confidence interval	-9.760 to 12.71

## Sheet: Figure 8H
Mes Myogenic Reactivity				Control							Stim1 smKO
	Intraluminal pressure (mmHg)	Vessel 1	Vessel 2	Vessel 3	Vessel 4	Vessel 5	Vessel 6		Vessel 1	Vessel 2	Vessel 3	Vessel 4	Vessel 5	Vessel 6
	5	4.05793	0.665923	0.800667	4.05546	1.71507	-0.276025		2.85496	-0.644958	4.13149	3.27633	1.21707	2.14819
	20	4.48952	17.6016	10.5783	4.13804	11.3192	-3.76741		4.43724	1.84526	3.34003	3.66641	1.53689	0.701387
	40	7.25701	13.6791	15.9868	14.492	8.08926	3.37668		11.2718	9.20648	8.62223	1.91399	4.5039	10.0008
	60	20.0239	17.5952	17.0683	17.4222	14.977	15.9422		13.5152	15.1165	7.93063	3.5595	4.44596	12.0477
	80	18.8173	16.9598	17.3326	16.6829	15.3533	23.3109		13.6059	14.7876	5.83684	3.97123	6.00725	10.8238
	100	18.894	15.5795	17.5867	21.7885	15.3628	27.1907		14.5897	8.52158	4.19554	3.86813	6.42906	9.33651
	120	18.9428	15.2694	17.0845	22.0242	15.8171	33.7035		13.7989	8.36334	2.94798	3.74435	5.88879	8.76381
	140	18.3711	14.303	16.6646	20.8124	15.9567	35.6259		13.8563	5.64758	2.59895	3.75076	5.6184	8.37288
Two-way RM ANOVA
Alpha	0.05
Source of Variation	% of total variation	P value	Significant?
Row x Column Factor	9.741	0.0006	Yes
Row Factor	33.27	<0.0001	Yes
Column Factor	26.66	0.0001	Yes

## Sheet: Figure 8J
Mes Phenylephrine CRC				Control							Stim1 smKO
	log [PE] (M)	Vessel 1	Vessel 2	Vessel 3	Vessel 4	Vessel 5	Vessel 6		Vessel 1	Vessel 2	Vessel 3	Vessel 4	Vessel 5	Vessel 6
	-8	-0.646893	-0.321219	-0.613785	-1.3566	-0.922577	-0.758818		-0.0192721	-0.713924	0.220117	-0.243539	-0.412772	-0.233897
	-7.5	-0.94324	-0.380605	-1.14055	-0.418073	-1.62047	-1.14016		-0.149895	-0.785515	0.0448203	-0.417795	-0.666165	0.125872
	-7	-1.04552	-0.506573	-1.43165	1.59395	10.4709	2.29115		-0.512853	-1.23694	-0.392426	-0.571057	-1.0288	-0.14372
	-6.5	3.08498	5.64698	-0.103966	20.5996	33.6255	11.81		1.24412	2.65782	2.15038	3.00854	-1.2992	-0.1719
	-6	24.7375	24.5566	34.8009	68.1505	40.2963	33.1018		21.451	11.0857	9.03178	6.92301	-1.02432	0.094874
	-5.5	51.8117	44.9266	54.0778	73.9368	44.7841	41.2245		17.1693	12.5782	13.9162	8.99099	5.19949	18.6413
	-5	60.1217	52.2634	49.2214	78.3355	40.3908	46.6182		6.42512	12.5056	15.1204	9.49382	15.0326	22.0305
	-4.5	59.0263	42.1112	49.6989	72.1955	39.6308	45.0147		6.27523	10.7735	9.89432	8.78315	16.8189	21.3504
	-4	54.4089	37.1634	47.628	72.4328	37.5184	43.0507		5.37158	7.03384	7.20112	7.00174	8.83385	16.8547
Two-way RM ANOVA
Alpha	0.05
Source of Variation	% of total variation	P value	Significant?
Row x Column Factor	16.66	<0.0001	Yes
Row Factor	44.55	<0.0001	Yes
Column Factor	26.42	<0.0001	Yes
