# Supplementary material for: STIM1-dependent peripheral coupling governs the contractility of vascular smooth muscle cells
Source: eLife. 2022 Feb 11;11:e70278. doi: 10.7554/eLife.70278 (PMC8947769; doi:10.7554/eLife.70278)
Supplement: Figure 9—figure supplement 1—source data 1. [file elife-70278-fig9-figsupp1-data1.xlsx]

## Sheet: Supplementary Figure 1A
			Baseline							+ Tamoxifen						Systolic BP day	Control	Stim1 smKO + vehicle		Systolic BP night	Control	Stim1 smKO + vehicle
Time (h)	Mean	SD	SEM	Upper limit	Lower limit	N		Mean	SD	SEM	Upper limit	Lower limit	N			Mouse 1	109.303	105.323		Mouse 1	128.814	132.581
0	114.834	18.7453	8.38314	138.109	91.5587	5		123.202	7.83275	3.50291	132.928	113.476	5			Mouse 2	93.9375	96.2406		Mouse 2	108.95	108.378
0.08	114.668	16.2577	7.27068	134.855	94.4813	5		120.702	14.7698	6.60526	139.041	102.363	5			Mouse 3	100.023	102.616		Mouse 3	126.603	124.705
0.17	106.798	15.2877	6.83687	125.78	87.8158	5		117.218	10.6104	4.7451	130.393	104.043	5			Mouse 4	97.7653	101.165		Mouse 4	112.648	121.277
0.25	101.12	15.7233	7.03168	120.643	81.5969	5		107.796	15.5913	6.97264	127.155	88.4369	5			Mouse 5	102.032	105.848		Mouse 5	114.311	115.703
0.33	110.772	26.368	11.7921	143.512	78.0318	5		99.88	10.1717	4.54893	112.51	87.2501	5
0.42	115.144	22.0617	9.86628	142.537	87.7508	5		98.59	17.4525	7.805	120.26	76.9198	5		Paired t test				Paired t test
0.5	104.834	17.2843	7.72979	126.295	83.3727	5		110.18	18.8093	8.41177	133.535	86.8252	5		P value	0.3182			P value	0.2896
0.58	113.064	15.1327	6.76757	131.854	94.2742	5		108.214	20.652	9.23584	133.857	82.5712	5		Significantly different (P < 0.05)?	No			Significantly different (P < 0.05)?	No
0.67	108.106	10.7105	4.78986	121.405	94.8072	5		123.48	22.7835	10.1891	151.769	95.1905	5		One- or two-tailed P value?	Two-tailed			One- or two-tailed P value?	Two-tailed
0.75	108.366	13.7434	6.14625	125.431	91.3013	5		113.65	22.1131	9.88928	141.107	86.193	5
0.83	113.75	10.1561	4.54195	126.36	101.14	5		106.056	15.1515	6.77596	124.869	87.2429	5		Mean of differences (B - A)	1.626			Mean of differences (B - A)	2.264
0.92	112.284	11.4067	5.10122	126.447	98.1207	5		114.932	14.6274	6.54159	133.094	96.7696	5		SD of differences	3.193			SD of differences	4.15
1	114.82	12.6252	5.64615	130.496	99.1438	5		100.63	13.5869	6.07622	117.5	83.7597	5		SEM of differences	1.428			SEM of differences	1.856
1.08	117.704	22.335	9.98851	145.437	89.9715	5		116.654	13.5762	6.07146	133.511	99.7969	5		95% confidence interval	-2.338 to 5.591			95% confidence interval	-2.889 to 7.416
1.17	118.288	19.1601	8.56867	142.078	94.4976	5		121.296	13.6062	6.0849	138.19	104.402	5
1.25	119.822	19.4083	8.67964	143.921	95.7235	5		125.154	13.7413	6.14528	142.216	108.092	5
1.33	118.508	18.9285	8.46506	142.011	95.0052	5		128.506	12.2413	5.47447	143.706	113.306	5
1.42	121.286	13.7834	6.1641	138.4	104.172	5		131.352	10.5753	4.72943	144.483	118.221	5
1.5	122.368	10.4469	4.67198	135.34	109.396	5		126.412	7.33545	3.28051	135.52	117.304	5
1.58	122.556	12.729	5.6926	138.361	106.751	5		118.788	22.2389	9.94554	146.401	91.1747	5
1.67	122.936	10.1826	4.55379	135.579	110.293	5		121.342	18.3486	8.20576	144.125	98.5592	5
1.75	118.928	9.32385	4.16975	130.505	107.351	5		130.892	17.466	7.81105	152.579	109.205	5
1.83	119.18	11.0166	4.92677	132.859	105.501	5		129.156	11.94	5.33971	143.981	114.331	5
1.92	119.498	8.89456	3.97777	130.542	108.454	5		123.582	10.511	4.70066	136.633	110.531	5
2	123.902	11.4629	5.12635	138.135	109.669	5		122.402	8.86449	3.96432	133.409	111.395	5
2.08	118.114	14.7502	6.59648	136.429	99.7992	5		129.038	11.6252	5.19896	143.473	114.603	5
2.17	119.492	14.4026	6.44105	137.375	101.609	5		118.846	13.6664	6.1118	135.815	101.877	5
2.25	121.756	11.3831	5.09069	135.89	107.622	5		123.322	7.51203	3.35948	132.649	113.995	5
2.33	118.314	6.71972	3.00515	126.658	109.97	5		124.656	6.57276	2.93943	132.817	116.495	5
2.42	114.572	10.0265	4.48398	127.022	102.122	5		125.404	11.777	5.26684	140.027	110.781	5
2.5	117.774	7.75708	3.46907	127.406	108.142	5		117.46	13.0761	5.84779	133.696	101.224	5
2.58	126.2	15.9024	7.11175	145.945	106.455	5		119.838	10.0712	4.50399	132.343	107.333	5
2.67	118.274	17.6939	7.91293	140.244	96.3042	5		124.902	23.9342	10.7037	154.62	95.1838	5
2.75	116.68	15.2851	6.83571	135.659	97.701	5		100.342	15.8103	7.07058	119.973	80.7109	5
2.83	116.72	17.763	7.94385	138.776	94.6643	5		109.734	15.084	6.74576	128.463	91.0048	5
2.92	115.2	23.3081	10.4237	144.141	86.2592	5		120.332	13.739	6.14429	137.391	103.273	5
3	111.398	19.273	8.61916	135.329	87.4674	5		106.804	15.8768	7.10031	126.518	87.0904	5
3.08	112.66	18.7969	8.40625	135.999	89.3205	5		115.158	12.6356	5.65082	130.847	99.4688	5
3.17	109.276	15.8346	7.08147	128.937	89.6147	5		120.602	10.7326	4.79978	133.928	107.276	5
3.25	112.534	16.5624	7.40694	133.099	91.969	5		116.42	17.1272	7.6595	137.686	95.1538	5
3.33	110.956	12.381	5.53694	126.329	95.583	5		117.172	22.4061	10.0203	144.993	89.3512	5
3.42	121.74	12.721	5.68901	137.535	105.945	5		119.538	11.345	5.07366	133.625	105.451	5
3.5	118.74	5.24871	2.34729	125.257	112.223	5		122.528	26.3298	11.775	155.221	89.8353	5
3.58	117.866	7.8354	3.5041	127.595	108.137	5		125.934	20.3705	9.10994	151.227	100.641	5
3.67	119.746	9.73372	4.35305	131.832	107.66	5		116.048	20.4188	9.13158	141.401	90.6947	5
3.75	121.418	8.40172	3.75736	131.85	110.986	5		114.634	7.30817	3.26831	123.708	105.56	5
3.83	120.432	14.9538	6.68753	139	101.864	5		128.38	17.712	7.92103	150.372	106.388	5
3.92	129.35	20.7202	9.26636	155.078	103.622	5		114.832	14.1686	6.33637	132.425	97.2394	5
4	127.84	15.2128	6.80337	146.729	108.951	5		124.358	10.069	4.50301	136.86	111.856	5
4.08	124.762	2.82437	1.2631	128.269	121.255	5		128.968	9.53525	4.26429	140.808	117.128	5
4.17	130.194	2.57193	1.1502	133.387	127.001	5		121.97	16.6946	7.46606	142.699	101.241	5
4.25	130.498	19.0913	8.53787	154.203	106.793	5		121.416	10.928	4.88713	134.985	107.847	5
4.33	118.874	8.41748	3.76441	129.326	108.422	5		126.06	17.293	7.73368	147.532	104.588	5
4.42	117.85	9.7243	4.34884	129.924	105.776	5		120.382	23.8529	10.6673	149.999	90.7648	5
4.5	123.148	7.18198	3.21188	132.066	114.23	5		119.846	15.4502	6.90952	139.03	100.662	5
4.58	123.538	8.96334	4.00853	134.667	112.409	5		118.092	15.806	7.06865	137.718	98.4663	5
4.67	123.73	10.3549	4.63086	136.587	110.873	5		123.954	20.9703	9.37819	149.992	97.916	5
4.75	115.868	7.53227	3.36853	125.221	106.515	5		122.518	18.6055	8.32061	145.62	99.4163	5
4.83	111.156	10.2771	4.59607	123.917	98.3953	5		115.538	21.1351	9.45189	141.781	89.2953	5
4.92	113.27	13.0297	5.82706	129.449	97.0915	5		126.538	15.4869	6.92593	145.767	107.309	5
5	115.878	24.6342	11.0167	146.465	85.2907	5		123.442	24.5721	10.989	153.952	92.9318	5
5.08	118.728	22.8888	10.2362	147.148	90.3078	5		124.114	10.513	4.70155	137.168	111.06	5
5.17	116.836	14.9589	6.68981	135.41	98.2621	5		122.524	15.3936	6.88422	141.638	103.41	5
5.25	116.922	16.8096	7.51747	137.794	96.0502	5		115.196	11.0607	4.94651	128.93	101.462	5
5.33	122.874	8.76844	3.92137	133.761	111.987	5		113.69	12.9527	5.79264	129.773	97.607	5
5.42	119.716	19.7037	8.81174	144.181	95.2507	5		111.792	26.228	11.7295	144.358	79.2257	5
5.5	121.758	15.9509	7.13348	141.564	101.952	5		113.834	17.6725	7.90336	135.777	91.8907	5
5.58	117.406	17.4512	7.80443	139.075	95.7374	5		111.81	19.3259	8.64279	135.806	87.8138	5
5.67	126.022	14.4526	6.46342	143.967	108.077	5		115.876	21.581	9.6513	142.672	89.0797	5
5.75	120.346	16.5376	7.39583	140.88	99.8119	5		113.936	17.5583	7.8523	135.737	92.1345	5
5.83	119.36	3.64958	1.63214	123.892	114.828	5		114.966	21.4515	9.59339	141.602	88.3305	5
5.92	121.972	8.04043	3.59579	131.956	111.988	5		101.338	10.1658	4.54628	113.961	88.7155	5
6	134.66	10.3228	4.61652	147.478	121.842	5		120.486	27.3393	12.2265	154.432	86.5398	5
6.08	120.956	15.366	6.8719	140.035	101.877	5		117.562	27.4033	12.2551	151.588	83.5363	5
6.17	116.248	7.69695	3.44218	125.805	106.691	5		121.77	19.2564	8.61172	145.68	97.86	5
6.25	120.062	14.0246	6.27198	137.476	102.648	5		125.424	26.9713	12.0619	158.913	91.9347	5
6.33	117.044	11.2459	5.02931	131.008	103.08	5		122.69	22.0837	9.87612	150.111	95.2695	5
6.42	123.788	9.24897	4.13627	135.272	112.304	5		126.702	24.6152	11.0082	157.266	96.1382	5
6.5	126.166	4.26805	1.90873	131.465	120.867	5		123.792	15.8859	7.10441	143.517	104.067	5
6.58	120.944	11.1747	4.99749	134.819	107.069	5		134.482	25.6217	11.4584	166.296	102.668	5
6.67	118.544	6.83252	3.0556	127.028	110.06	5		133.322	11.2154	5.01568	147.248	119.396	5
6.75	114.008	11.3949	5.09594	128.157	99.8594	5		130.734	11.1858	5.00244	144.623	116.845	5
6.83	113.26	11.6999	5.23233	127.787	98.7327	5		126.232	10.2623	4.58943	138.974	113.49	5
6.92	122.902	17.1364	7.66364	144.18	101.624	5		135.006	17.522	7.83607	156.762	113.25	5
7	125.078	21.93	9.80738	152.308	97.8483	5		128.726	10.0528	4.49575	141.208	116.244	5
7.08	111.582	11.684	5.22524	126.09	97.0744	5		120.292	16.7871	7.50742	141.136	99.4481	5
7.17	107.312	7.23922	3.23748	116.301	98.3233	5		118.49	12.7219	5.6894	134.286	102.694	5
7.25	114.864	12.8814	5.76073	130.858	98.8697	5		125.928	25.4951	11.4018	157.584	94.2716	5
7.33	112.276	7.27009	3.25129	121.303	103.249	5		116.132	29.7789	13.3175	153.107	79.1566	5
7.42	115.956	10.4343	4.66638	128.912	103	5		109.672	30.637	13.7013	147.713	71.6312	5
7.5	120.01	14.5144	6.49102	138.032	101.988	5		118.68	29.0163	12.9765	154.708	82.6516	5
7.58	109.132	20.8548	9.32654	135.027	83.2374	5		108.28	21.7511	9.7274	135.288	81.2724	5
7.67	119.536	15.3752	6.87599	138.627	100.445	5		126.576	34.3569	15.3649	169.236	83.9163	5
7.75	118.676	23.7797	10.6346	148.202	89.1496	5		126.052	26.1882	11.7117	158.569	93.5351	5
7.83	109.746	16.9994	7.60238	130.854	88.6384	5		113.194	20.444	9.14285	138.579	87.8094	5
7.92	113.52	15.8795	7.10154	133.237	93.803	5		115.084	18.4464	8.24947	137.988	92.1798	5
8	115.21	14.4775	6.47456	133.186	97.2337	5		116.094	18.5918	8.31453	139.179	93.0092	5
8.08	118.968	11.5243	5.15383	133.277	104.659	5		111.098	13.5143	6.04376	127.878	94.3178	5
8.17	122.29	17.262	7.71981	143.724	100.856	5		99.042	17.2605	7.71912	120.474	77.6103	5
8.25	116.418	22.9479	10.2626	144.912	87.9244	5		104.022	16.0005	7.15562	123.889	84.1548	5
8.33	122.55	13.5085	6.04118	139.323	105.777	5		112.284	17.6747	7.90435	134.23	90.338	5
8.42	121.048	13.6777	6.11686	138.031	104.065	5		123.056	10.0354	4.48798	135.517	110.595	5
8.5	122.302	15.3569	6.86781	141.37	103.234	5		128.68	14.9569	6.68893	147.251	110.109	5
8.58	117.188	11.7623	5.26028	131.793	102.583	5		127.91	22.7133	10.1577	156.112	99.7077	5
8.67	119.412	9.11074	4.07445	130.724	108.1	5		128.8	26.4187	11.8148	161.603	95.9968	5
8.75	111.94	15.3354	6.8582	130.981	92.8986	5		121.64	24.425	10.9232	151.968	91.3123	5
8.83	120.284	15.4217	6.89681	139.433	101.135	5		119.1	29.9769	13.4061	156.321	81.8788	5
8.92	120.54	10.9805	4.91063	134.174	106.906	5		116.126	16.2446	7.2648	136.296	95.9557	5
9	121.51	9.88607	4.42118	133.785	109.235	5		124.218	14.9449	6.68357	142.775	105.661	5
9.08	109.956	9.41047	4.20849	121.641	98.2714	5		118.504	21.3341	9.5409	144.994	92.0142	5
9.17	113.752	8.49443	3.79883	124.299	103.205	5		111.392	21.7888	9.74423	138.446	84.3377	5
9.25	125.398	20.2565	9.059	150.55	100.246	5		108.59	20.6914	9.25348	134.282	82.8982	5
9.33	124.43	18.4002	8.22882	147.277	101.583	5		112.312	14.9723	6.6958	130.903	93.7215	5
9.42	116.216	23.0751	10.3195	144.868	87.5644	5		107.552	15.267	6.82759	126.508	88.5956	5
9.5	122.85	22.9712	10.273	151.373	94.3274	5		130.186	17.3288	7.74967	151.703	108.669	5
9.58	117.002	20.9565	9.37203	143.023	90.9811	5		127.52	9.72635	4.34976	139.597	115.443	5
9.67	125.602	18.2727	8.17179	148.291	102.913	5		124.228	8.82264	3.9456	135.183	113.273	5
9.75	111.278	5.1717	2.31285	117.7	104.856	5		112.406	19.9718	8.93166	137.204	87.6077	5
9.83	113.68	5.60464	2.50647	120.639	106.721	5		125.07	14.1254	6.31708	142.609	107.531	5
9.92	126.762	23.0405	10.304	155.371	98.1535	5		124.712	12.2916	5.49699	139.974	109.45	5
10	120.562	10.7576	4.81095	133.919	107.205	5		124.05	13.5941	6.07946	140.929	107.171	5
10.08	116.314	14.2138	6.35659	133.963	98.6653	5		114.368	17.9085	8.00892	136.604	92.1317	5
10.17	116.124	17.7075	7.91904	138.111	94.1372	5		111.792	17.1173	7.65507	133.046	90.5381	5
10.25	121.716	13.7479	6.14824	138.786	104.646	5		118.322	21.4171	9.57804	144.915	91.7291	5
10.33	121.38	5.54814	2.4812	128.269	114.491	5		130.348	26.3253	11.7731	163.035	97.6608	5
10.42	124.114	8.33207	3.72622	134.46	113.768	5		123.298	25.1023	11.2261	154.467	92.1293	5
10.5	122.966	8.20364	3.66878	133.152	112.78	5		113.548	13.6925	6.12347	130.549	96.5465	5
10.58	117.29	12.1578	5.43714	132.386	102.194	5		116.416	15.8888	7.10568	136.145	96.6875	5
10.67	123.494	7.62865	3.41164	132.966	114.022	5		133.546	17.1677	7.67761	154.862	112.23	5
10.75	109.492	13.3678	5.97828	126.09	92.8936	5		113.734	11.8238	5.28778	128.415	99.0528	5
10.83	116.73	10.7125	4.79077	130.031	103.429	5		109.396	18.8601	8.43449	132.814	85.9781	5
10.92	117.73	13.2069	5.90631	134.129	101.331	5		123.702	27.3796	12.2445	157.698	89.7057	5
11	124.304	10.6412	4.75887	137.517	111.091	5		120.078	16.6505	7.44632	140.752	99.4037	5
11.08	126.966	15.7813	7.0576	146.561	107.371	5		121	17.1728	7.67989	142.323	99.6772	5
11.17	124.78	14.1653	6.33492	142.369	107.191	5		116.864	9.91788	4.43541	129.179	104.549	5
11.25	122.7	18.4458	8.24922	145.604	99.7965	5		119.926	8.15169	3.64555	130.048	109.804	5
11.33	119.794	16.9825	7.59482	140.881	98.7074	5		113.37	16.1296	7.21337	133.398	93.3425	5
11.42	118.35	14.6262	6.54104	136.511	100.189	5		121.054	15.7754	7.05498	140.642	101.466	5
11.5	124.704	7.20361	3.22155	133.648	115.76	5		120.586	10.8916	4.87089	134.11	107.062	5
11.58	125.886	10.5413	4.7142	138.975	112.797	5		128.924	17.6034	7.87247	150.781	107.067	5
11.67	125.312	7.46072	3.33654	134.576	116.048	5		122.906	21.0094	9.39569	148.993	96.8194	5
11.75	126.704	7.84943	3.51037	136.45	116.958	5		116.42	21.5897	9.6552	143.227	89.6129	5
11.83	125.366	11.4073	5.1015	139.53	111.202	5		118.108	22.3119	9.9782	145.812	90.4041	5
11.92	124.996	9.3778	4.19388	136.64	113.352	5		117.382	15.6282	6.98915	136.787	97.977	5
12	120.828	12.1165	5.41864	135.873	105.783	5		125.134	13.6634	6.11047	142.099	108.169	5
12.08	125.678	13.0573	5.83942	141.891	109.465	5		125.902	19.5931	8.76229	150.23	101.574	5
12.17	125.304	10.3517	4.62943	138.157	112.451	5		131.068	20.7556	9.28218	156.839	105.297	5
12.25	123.126	14.1892	6.34561	140.744	105.508	5		129.25	20.9485	9.36846	155.261	103.239	5
12.33	122.404	9.22883	4.12726	133.863	110.945	5		118.236	28.3685	12.6868	153.46	83.0118	5
12.42	122.95	7.7398	3.46134	132.56	113.34	5		110.542	14.6678	6.55963	128.754	92.3295	5
12.5	118.398	8.00472	3.57982	128.337	108.459	5		108.404	10.3873	4.64532	121.301	95.5065	5
12.58	115.268	23.0717	10.318	143.915	86.6207	5		101.056	15.2275	6.80997	119.963	82.1485	5
12.67	116.042	17.4305	7.79518	137.685	94.3991	5		96.37	10.8074	4.8332	109.789	82.9509	5
12.75	122.002	15.381	6.8786	141.1	102.904	5		93.25	10.8305	4.84357	106.698	79.8021	5
12.83	119.742	19.7527	8.83368	144.268	95.2158	5		97.056	9.54377	4.2681	108.906	85.2058	5
12.92	112.446	7.43116	3.32332	121.673	103.219	5		103.254	18.2488	8.16111	125.913	80.5951	5
13	105.606	8.17176	3.65452	115.753	95.4594	5		103.172	9.01441	4.03137	114.365	91.9791	5
13.08	105.038	19.7518	8.83327	129.563	80.5129	5		106.452	14.0755	6.29475	123.929	88.975	5
13.17	106.848	13.7513	6.14975	123.922	89.7736	5		108.892	10.4281	4.66359	121.84	95.9438	5
13.25	109.568	13.4651	6.02176	126.287	92.8489	5		106.048	14.8064	6.62164	124.433	87.6634	5
13.33	108.362	13.5365	6.0537	125.17	91.5542	5		109.634	33.9268	15.1725	151.76	67.5083	5
13.42	113.552	11.3398	5.07132	127.632	99.4718	5		106.036	21.2256	9.49236	132.391	79.681	5
13.5	115.156	8.98175	4.01676	126.308	104.004	5		103.058	16.5544	7.40335	123.613	82.503	5
13.58	105.86	13.8563	6.19674	123.065	88.6551	5		99.488	12.0463	5.38728	114.445	84.5305	5
13.67	100.482	12.1538	5.43536	115.573	85.391	5		97.668	10.7733	4.81795	111.045	84.2912	5
13.75	98.928	9.06119	4.05229	110.179	87.677	5		107.73	18.242	8.15806	130.38	85.0796	5
13.83	106.618	15.7331	7.03605	126.153	87.0828	5		96.376	14.181	6.34193	113.984	78.768	5
13.92	110.184	12.7232	5.68997	125.982	94.3861	5		103.832	20.1204	8.99811	128.815	78.8492	5
14	105.91	11.5741	5.1761	120.281	91.5388	5		107.306	21.8646	9.77813	134.454	80.1575	5
14.08	101.72	13.5662	6.06698	118.565	84.8754	5		111.42	15.0932	6.7499	130.161	92.6793	5
14.17	103.296	12.7592	5.70609	119.139	87.4534	5		106.252	18.0564	8.07508	128.672	83.832	5
14.25	104.946	22.0247	9.84974	132.293	77.5987	5		107.092	18.8984	8.45164	130.558	83.6265	5
14.33	97.958	10.9001	4.87466	111.492	84.4238	5		106.83	17.6334	7.88588	128.725	84.9353	5
14.42	93.028	7.75386	3.46763	102.656	83.4003	5		101.312	15.9044	7.11266	121.06	81.5641	5
14.5	96.872	10.3797	4.64193	109.76	83.9839	5		104.214	16.7706	7.50005	125.037	83.3905	5
14.58	98.872	13.1726	5.89098	115.228	82.516	5		101.604	20.053	8.96795	126.503	76.705	5
14.67	96.22	6.99326	3.12748	104.903	87.5367	5		93.324	9.01377	4.03108	104.516	82.1319	5
14.75	100.462	9.61621	4.3005	112.402	88.5219	5		97.696	9.81002	4.38718	109.877	85.5152	5
14.83	105.958	15.7554	7.04601	125.521	86.3951	5		95.292	5.74847	2.57079	102.43	88.1543	5
14.92	103.21	13.3373	5.96461	119.77	86.6496	5		91.762	7.16358	3.20365	100.657	82.8672	5
15	101.316	10.6817	4.777	114.579	88.0529	5		90.144	12.1407	5.42949	105.219	75.0693	5
15.08	95.166	7.10603	3.17791	103.989	86.3427	5		88.866	4.65243	2.08063	94.6428	83.0892	5
15.17	97.65	7.4736	3.34229	106.93	88.3703	5		88.116	2.39622	1.07162	91.0913	85.1407	5
15.25	102.296	17.4689	7.81235	123.987	80.6055	5		96.926	6.87964	3.07667	105.468	88.3838	5
15.33	101.374	10.4066	4.65398	114.296	88.4525	5		86.376	6.70706	2.99949	94.7039	78.0481	5
15.42	99.942	16.8544	7.53753	120.87	79.0145	5		90.276	9.46772	4.23409	102.032	78.5203	5
15.5	94.624	4.91627	2.19862	100.728	88.5196	5		94.746	5.54949	2.48181	101.637	87.8554	5
15.58	105.624	15.6285	6.98927	125.029	86.2187	5		95.668	7.94944	3.5551	105.539	85.7975	5
15.67	101.992	14.2371	6.36703	119.67	84.3143	5		94.42	5.53343	2.47463	101.291	87.5493	5
15.75	103.76	15.8062	7.06874	123.386	84.134	5		94.344	7.15067	3.19788	103.223	85.4653	5
15.83	97.618	24.0099	10.7375	127.43	67.8058	5		91.82	3.91498	1.75083	96.6811	86.9589	5
15.92	106.752	25.9689	11.6136	138.997	74.5074	5		95.602	9.19392	4.11165	107.018	84.1862	5
16	103.712	14.6234	6.53977	121.869	85.5547	5		109.978	16.9928	7.59942	131.077	88.8786	5
16.08	108.508	16.3293	7.30269	128.784	88.2325	5		101.342	14.28	6.3862	119.073	83.6111	5
16.17	109.368	14.8176	6.62665	127.767	90.9695	5		113.328	24.729	11.0591	144.033	82.6229	5
16.25	104.784	13.6025	6.08324	121.674	87.8942	5		111.92	12.9166	5.77646	127.958	95.882	5
16.33	96.548	16.8846	7.55102	117.513	75.583	5		108.18	17.2889	7.73182	129.647	86.713	5
16.42	97.96	10.7656	4.81452	111.327	84.5927	5		100.662	10.5751	4.72934	113.793	87.5312	5
16.5	91.164	7.25228	3.24332	100.169	82.1591	5		95.484	7.139	3.19266	104.348	86.6198	5
16.58	93.634	8.73196	3.90505	104.476	82.7918	5		97.188	9.98396	4.46496	109.585	84.7913	5
16.67	96.728	18.5674	8.30359	119.782	73.6735	5		94.128	8.9525	4.00368	105.244	83.012	5
16.75	103.722	8.85388	3.95958	114.716	92.7285	5		94.16	10.0814	4.50853	106.678	81.6423	5
16.83	104.582	13.4152	5.99944	121.239	87.9249	5		95.17	8.4195	3.76531	105.624	84.7158	5
16.92	104.322	6.52382	2.91754	112.422	96.2216	5		90.634	10.351	4.62912	103.487	77.7815	5
17	100.164	11.5597	5.16966	114.517	85.8107	5		94.198	2.66518	1.1919	97.5073	90.8887	5
17.08	99.75	11.191	5.00475	113.645	85.8546	5		88.562	6.04182	2.70198	96.0639	81.0601	5
17.17	101.816	10.4327	4.66564	114.77	88.8621	5		84.356	4.17615	1.86763	89.5414	79.1706	5
17.25	104.16	22.8868	10.2353	132.578	75.7423	5		93.068	8.68872	3.88571	103.856	82.2795	5
17.33	104.228	25.2674	11.2999	135.602	72.8544	5		98.142	17.689	7.91078	120.106	76.1781	5
17.42	107.06	25.9058	11.5854	139.226	74.8936	5		96.316	15.5643	6.96058	115.642	76.9903	5
17.5	98.322	16.3575	7.31528	118.632	78.0115	5		103.448	24.2708	10.8542	133.584	73.3119	5
17.58	101.654	28.0523	12.5454	136.486	66.8224	5		96.782	12.4176	5.55332	112.201	81.3635	5
17.67	96.2	19.3423	8.65016	120.217	72.1833	5		105.368	17.0661	7.63219	126.558	84.1776	5
17.75	100.046	18.4029	8.23003	122.896	77.1958	5		96.04	19.7062	8.81289	120.509	71.5715	5
17.83	92.006	12.5268	5.60214	107.56	76.452	5		99.858	18.7781	8.39781	123.174	76.5419	5
17.92	87.944	7.31098	3.26957	97.0218	78.8662	5		98.06	17.4913	7.82234	119.778	76.3417	5
18	96.056	13.7923	6.16811	113.181	78.9306	5		109.126	15.5698	6.96303	128.458	89.7935	5
18.08	97.738	12.4268	5.55743	113.168	82.3081	5		104.88	16.3116	7.29478	125.134	84.6264	5
18.17	97.204	13.7709	6.15853	114.303	80.1052	5		97.946	18.9462	8.473	121.471	74.4212	5
18.25	99.852	17.3254	7.74814	121.364	78.3397	5		100.174	15.5258	6.94334	119.452	80.8962	5
18.33	101.068	14.3634	6.42351	118.903	83.2335	5		101.21	17.6364	7.88724	123.109	79.3115	5
18.42	97.832	17.2805	7.72806	119.289	76.3755	5		96.578	10.0509	4.49489	109.058	84.0982	5
18.5	104.272	18.2016	8.14001	126.872	81.6717	5		90.086	4.80309	2.14801	96.0498	84.1222	5
18.58	92.244	18.7087	8.3668	115.474	69.014	5		91.82	13.0884	5.85333	108.071	75.5686	5
18.67	96.362	15.7629	7.0494	115.934	76.7897	5		99.134	9.02575	4.03644	110.341	87.9271	5
18.75	95.12	10.9754	4.90835	108.748	81.4922	5		97.154	10.3204	4.61543	109.968	84.3395	5
18.83	102.786	19.8297	8.86811	127.408	78.1642	5		104.482	14.5535	6.50851	122.553	86.4115	5
18.92	109.004	19.8675	8.88501	133.673	84.3352	5		100.166	18.2935	8.1811	122.88	77.4516	5
19	102.102	18.1522	8.11793	124.641	79.563	5		96.502	23.9932	10.7301	126.293	66.7105	5
19.08	102.592	30.527	13.6521	140.496	64.6877	5		89.046	10.5708	4.72742	102.171	75.9206	5
19.17	96.878	12.7652	5.70875	112.728	81.028	5		94.48	13.5436	6.05689	111.297	77.6634	5
19.25	89.484	9.45612	4.22891	101.225	77.7427	5		87.46	7.13683	3.19169	96.3215	78.5985	5
19.33	86.88	10.5022	4.69675	99.9203	73.8397	5		89.056	5.38845	2.40979	95.7466	82.3654	5
19.42	82.854	6.54162	2.9255	90.9765	74.7315	5		98.244	14.2273	6.36266	115.91	80.5784	5
19.5	86.674	4.63319	2.07203	92.4269	80.9211	5		110.596	20.7774	9.29194	136.395	84.7974	5
19.58	87.852	6.10419	2.72988	95.4314	80.2726	5		107.594	17.1006	7.64763	128.827	86.3608	5
19.67	85.402	8.46274	3.78465	95.9099	74.8941	5		109.436	23.0785	10.321	138.092	80.7803	5
19.75	88.894	18.1588	8.12085	111.441	66.3469	5		94.464	11.34	5.07142	108.545	80.3835	5
19.83	87.466	19.4317	8.69011	111.594	63.3384	5		103.108	13.6411	6.1005	120.046	86.1703	5
19.92	90.596	15.8832	7.10317	110.318	70.8744	5		94.708	15.4452	6.90728	113.886	75.5303	5
20	93.604	12.8365	5.74067	109.543	77.6653	5		91.186	13.4849	6.03063	107.93	74.4423	5
20.08	99.272	16.6242	7.43458	119.914	78.6303	5		94.52	11.0976	4.96299	108.299	80.7405	5
20.17	93.396	24.9926	11.177	124.428	62.3636	5		89.182	6.43439	2.87755	97.1713	81.1927	5
20.25	99.796	22.1322	9.89783	127.277	72.3152	5		91.872	12.7848	5.71755	107.746	75.9975	5
20.33	96.652	20.8033	9.30352	122.483	70.8213	5		92.714	11.67	5.21899	107.204	78.2238	5
20.42	116.964	18.5447	8.29344	139.99	93.9377	5		91.664	12.5314	5.6042	107.224	76.1043	5
20.5	120.744	28.6602	12.8172	156.33	85.1577	5		90.864	6.44616	2.88281	98.868	82.86	5
20.58	105.002	15.7714	7.0532	124.585	85.4192	5		91.076	16.2201	7.25386	111.216	70.9361	5
20.67	102.834	9.43563	4.21974	114.55	91.1181	5		104.166	24.2383	10.8397	134.262	74.0701	5
20.75	99.808	11.0083	4.92308	113.477	86.1393	5		112.586	22.8369	10.213	140.942	84.2302	5
20.83	100.906	12.2198	5.46486	116.079	85.7331	5		109.794	25.141	11.2434	141.011	78.5773	5
20.92	95.682	6.30085	2.81783	103.506	87.8585	5		104.308	24.4827	10.949	134.707	73.9087	5
21	97.452	6.44053	2.88029	105.449	89.455	5		94.248	20.9334	9.3617	120.24	68.2557	5
21.08	95.402	10.1677	4.54712	108.027	82.7772	5		98.574	18.7473	8.38404	121.852	75.2962	5
21.17	93.592	15.2339	6.81282	112.507	74.6766	5		95.444	18.1121	8.1	117.933	72.9548	5
21.25	96.818	17.2131	7.69795	118.191	75.4451	5		90.958	25.0434	11.1997	122.053	59.8626	5
21.33	95.51	12.285	5.49403	110.764	80.2561	5		91.744	21.1982	9.48012	118.065	65.423	5
21.42	89.018	7.07604	3.1645	97.8041	80.2319	5		95.362	16.0976	7.19905	115.35	75.3742	5
21.5	95.06	14.8881	6.65815	113.546	76.574	5		97.684	14.7596	6.60069	116.01	79.3576	5
21.58	95.682	10.4051	4.65329	108.602	82.7624	5		104.7	20.3574	9.10409	129.977	79.423	5
21.67	94.496	8.93807	3.99723	105.594	83.3979	5		108.008	21.7227	9.7147	134.98	81.0357	5
21.75	101.412	7.4293	3.32248	110.637	92.1873	5		100.432	11.9999	5.36654	115.332	85.5321	5
21.83	99.4	16.9299	7.57126	120.421	78.3788	5		93.786	11.5572	5.16852	108.136	79.4359	5
21.92	91.746	18.1886	8.13419	114.33	69.1619	5		92.238	9.36899	4.18994	103.871	80.6049	5
22	89.832	10.6254	4.75184	103.025	76.6388	5		87.8	10.5749	4.72925	100.93	74.6695	5
22.08	94.482	17.1495	7.6695	115.776	73.1881	5		97.08	15.4535	6.911	116.268	77.892	5
22.17	92.748	8.9313	3.9942	103.838	81.6583	5		107.968	21.9937	9.83589	135.277	80.6592	5
22.25	95.7	17.0309	7.61644	116.847	74.5534	5		112.768	32.7751	14.6575	153.464	72.0724	5
22.33	91.222	12.8218	5.73409	107.142	75.3016	5		102.44	21.014	9.39773	128.532	76.3477	5
22.42	91.336	6.60234	2.95265	99.5339	83.1381	5		103.118	21.282	9.51759	129.543	76.6929	5
22.5	99.712	18.1298	8.10787	122.223	77.2009	5		113.068	17.125	7.65851	134.331	91.8046	5
22.58	93.774	9.65695	4.31872	105.765	81.7833	5		113.408	11.1106	4.96882	127.204	99.6123	5
22.67	95.198	18.8087	8.41149	118.552	71.844	5		101.782	8.46118	3.78395	112.288	91.2761	5
22.75	100.93	19.6607	8.79251	125.342	76.5181	5		101.478	11.2494	5.03088	115.446	87.51	5
22.83	104.83	14.0293	6.27409	122.25	87.4103	5		102.466	7.92236	3.54299	112.303	92.6291	5
22.92	115.192	4.19359	1.87543	120.399	109.985	5		105.664	18.6222	8.3281	128.787	82.5415	5
23	111.724	6.43714	2.87878	119.717	103.731	5		97.946	9.38928	4.19901	109.604	86.2877	5
23.08	107.916	12.2246	5.46699	123.095	92.7372	5		100.93	16.6877	7.46298	121.651	80.2094	5
23.17	103.568	9.04178	4.04361	114.795	92.3411	5		107.88	27.1776	12.1542	141.625	74.1346	5
23.25	110.242	19.7865	8.84879	134.81	85.6738	5		115.99	12.7573	5.70522	131.83	100.15	5
23.33	105.008	14.1337	6.32077	122.557	87.4587	5		109.764	12.6871	5.67384	125.517	94.0109	5
23.42	108.02	23.9124	10.694	137.711	78.3288	5		115.922	21.636	9.67593	142.787	89.0573	5
23.5	100.898	16.3168	7.2971	121.158	80.638	5		118.24	13.3154	5.95482	134.773	101.707	5
23.58	103.946	15.9546	7.13512	123.756	84.1357	5		107.682	19.6257	8.77689	132.051	83.3135	5
23.67	96.084	10.058	4.49809	108.573	83.5953	5		103.104	16.0218	7.16516	122.998	83.2103	5
23.75	105.738	21.1558	9.46116	132.006	79.4696	5		101.584	21.9183	9.80214	128.799	74.3689	5
23.83	104.082	24.2134	10.8286	134.147	74.017	5		111.654	26.1864	11.7109	144.169	79.1393	5
23.92	109.308	11.7913	5.27323	123.949	94.6672	5		109.284	24.8652	11.1201	140.158	78.4098	5
24	112.244	16.6646	7.45262	132.936	91.5522	5		107.47	20.0565	8.96954	132.373	82.5666	5
24.08	111.216	25.3694	11.3455	142.716	79.7157	5		111.346	17.3479	7.75823	132.886	89.8057	5
24.17	109.158	23.3289	10.433	138.125	80.1914	5		104.252	23.4788	10.5	133.405	75.0993	5
24.25	106.57	21.7742	9.73773	133.606	79.5337	5		110.954	18.5851	8.31151	134.03	87.8775	5
24.33	105.382	14.6067	6.5323	123.519	87.2454	5		105.6	17.2995	7.73656	127.08	84.1199	5
24.42	106.252	21.3475	9.5469	132.758	79.7456	5		99.814	18.3891	8.22384	122.647	76.9809	5
24.5	110.138	22.561	10.0896	138.151	82.1248	5		110.788	26.0185	11.6358	143.094	78.4818	5
24.58	104.908	16.5306	7.39271	125.433	84.3825	5		109.912	5.6768	2.53874	116.961	102.863	5
24.67	107.474	15.8443	7.08579	127.147	87.8007	5		118.502	17.3703	7.76822	140.07	96.934	5
24.75	113.004	13.766	6.15632	130.097	95.9113	5		113.318	12.1554	5.43604	128.411	98.2251	5
24.83	106.992	12.3419	5.51946	122.316	91.6675	5		114.866	21.8878	9.7885	142.043	87.6888	5
24.92	108.47	3.73157	1.66881	113.103	103.837	5		118.054	21.0532	9.41529	144.195	91.913	5
25	109.196	9.97197	4.4596	121.578	96.8142	5		116.002	16.4194	7.34296	136.389	95.6147	5
25.08	118.88	12.6924	5.6762	134.64	103.12	5		120.772	23.4718	10.4969	149.916	91.6279	5
25.17	117.818	13.1941	5.90056	134.201	101.435	5		107.508	23.106	10.3333	136.198	78.8181	5
25.25	121.83	16.6552	7.44842	142.51	101.15	5		119.736	13.5824	6.07424	136.601	102.871	5
25.33	119.86	15.6043	6.97847	139.235	100.485	5		131.328	7.12216	3.18513	140.171	122.485	5
25.42	124.686	15.1774	6.78753	143.531	105.841	5		125.622	10.942	4.8934	139.208	112.036	5
25.5	125.092	15.1812	6.78926	143.942	106.242	5		136.204	17.2299	7.70547	157.598	114.81	5
25.58	127.288	11.4593	5.12474	141.517	113.059	5		133.314	14.732	6.58835	151.606	115.022	5
25.67	120.824	11.9191	5.33037	135.623	106.025	5		121.304	14.0595	6.2876	138.761	103.847	5
25.75	124.782	17.7998	7.96033	146.883	102.681	5		120.694	16.3005	7.28981	140.934	100.454	5
25.83	121.774	12.5078	5.59368	137.305	106.243	5		121.95	12.514	5.59642	137.488	106.412	5
25.92	121.792	17.3214	7.74637	143.299	100.285	5		125.848	14.9776	6.69818	144.445	107.251	5
26	119.61	8.99521	4.02278	130.779	108.441	5		130.214	17.156	7.67238	151.516	108.912	5
26.08	122.094	13.4237	6.00325	138.762	105.426	5		119.5	12.1968	5.45456	134.644	104.356	5
26.17	117.622	13.4744	6.02595	134.353	100.891	5		124.754	17.3126	7.74245	146.25	103.258	5
26.25	123.838	14.4258	6.4514	141.75	105.926	5		126.224	11.0387	4.93665	139.93	112.518	5
26.33	125.69	12.803	5.72566	141.587	109.793	5		126.462	15.0675	6.73837	145.171	107.753	5
26.42	122.474	15.7227	7.03139	141.996	102.952	5		122.608	16.6461	7.44437	143.277	101.939	5
26.5	122.516	14.4455	6.46022	140.452	104.58	5		120.108	12.4807	5.58155	135.605	104.611	5
26.58	115.664	15.1801	6.78873	134.513	96.8155	5		115.378	13.7399	6.14469	132.438	98.3176	5
26.67	111.41	18.8222	8.41755	134.781	88.0391	5		118.592	13.9402	6.23426	135.901	101.283	5
26.75	115.242	26.1359	11.6884	147.694	82.7899	5		124.012	18.9305	8.46596	147.517	100.507	5
26.83	116.922	18.8051	8.40989	140.272	93.5724	5		119.702	10.987	4.91354	133.344	106.06	5
26.92	114.686	22.404	10.0194	142.504	86.8677	5		123.958	16.0052	7.15776	143.831	104.085	5
27	113.816	16.8288	7.52605	134.712	92.9203	5		121.496	28.1686	12.5974	156.472	86.5201	5
27.08	116.196	17.0346	7.6181	137.347	95.0448	5		117.642	25.2485	11.2915	148.992	86.2919	5
27.17	113.798	12.0573	5.39218	128.769	98.8269	5		119.24	23.3383	10.4372	148.218	90.2617	5
27.25	122.54	19.9659	8.92901	147.331	97.7491	5		123.266	19.521	8.73005	147.504	99.0275	5
27.33	116.354	14.4813	6.47622	134.335	98.3731	5		120.936	15.4984	6.93109	140.18	101.692	5
27.42	105.874	9.21741	4.12215	117.319	94.4291	5		115.402	11.9714	5.35378	130.266	100.538	5
27.5	107.77	11.2215	5.01842	121.703	93.8366	5		112.608	27.1319	12.1337	146.297	78.9193	5
27.58	119.932	21.5616	9.64263	146.704	93.1598	5		117.284	15.3376	6.85918	136.328	98.2399	5
27.67	118.246	20.6632	9.24088	143.903	92.5892	5		125.072	8.97056	4.01176	136.21	113.934	5
27.75	114.886	16.0261	7.16711	134.785	94.9869	5		119.534	19.5368	8.7371	143.792	95.2759	5
27.83	111.184	13.6673	6.11222	128.154	94.2138	5		114.278	20.718	9.26539	140.003	88.5532	5
27.92	119	12.6137	5.64104	134.662	103.338	5		125.538	19.1943	8.58396	149.371	101.705	5
28	116.39	13.6974	6.12567	133.398	99.3824	5		123.764	4.85118	2.16952	129.788	117.74	5
28.08	122.742	13.7008	6.12719	139.754	105.73	5		132.056	10.2747	4.595	144.814	119.298	5
28.17	120.192	11.8549	5.30167	134.912	105.472	5		136.968	12.6111	5.63986	152.627	121.309	5
28.25	119.45	9.79798	4.38179	131.616	107.284	5		131.426	8.25865	3.69338	141.68	121.172	5
28.33	124.738	12.1308	5.42505	139.8	109.676	5		129.996	7.78528	3.48168	139.663	120.329	5
28.42	121.454	11.8391	5.29459	136.154	106.754	5		134.836	17.0309	7.61646	155.983	113.689	5
28.5	127.136	8.91014	3.98474	138.199	116.073	5		131.244	19.3797	8.66685	155.307	107.181	5
28.58	126.92	11.2509	5.03155	140.89	112.95	5		122.578	12.9536	5.79301	138.662	106.494	5
28.67	118.256	14.3439	6.41478	136.066	100.446	5		129.434	9.44531	4.22407	141.162	117.706	5
28.75	118.824	18.1088	8.09848	141.309	96.339	5		122.59	17.9695	8.0362	144.902	100.278	5
28.83	117.152	14.1612	6.33308	134.735	99.5685	5		125.734	22.8706	10.2281	154.132	97.3364	5
28.92	118.168	8.99122	4.02099	129.332	107.004	5		118.8	10.2155	4.5685	131.484	106.116	5
29	117.35	13.8707	6.20319	134.573	100.127	5		117.846	7.55061	3.37674	127.221	108.471	5
29.08	119.654	11.4355	5.11411	133.853	105.455	5		127.908	12.9128	5.77478	143.941	111.875	5
29.17	118.564	11.7238	5.24305	133.121	104.007	5		125.516	22.6291	10.1201	153.614	97.4182	5
29.25	114.772	11.0571	4.94488	128.501	101.043	5		117.36	15.6909	7.01717	136.843	97.8772	5
29.33	120.31	18.2237	8.1499	142.938	97.6822	5		118.376	13.908	6.21983	135.645	101.107	5
29.42	120.676	21.0076	9.39489	146.76	94.5916	5		113.156	10.6882	4.7799	126.427	99.8849	5
29.5	117.238	16.5959	7.42191	137.845	96.6315	5		104.036	18.4529	8.2524	126.948	81.1237	5
29.58	122.114	13.0823	5.85057	138.358	105.87	5		115.338	16.9664	7.58762	136.405	94.2714	5
29.67	119.082	16.628	7.43628	139.728	98.4356	5		116.42	19.9022	8.90055	141.132	91.7081	5
29.75	114.368	14.2288	6.36331	132.035	96.7006	5		122.044	18.3384	8.20118	144.814	99.2739	5
29.83	116.568	10.8555	4.85472	130.047	103.089	5		119.46	23.7849	10.6369	148.993	89.9271	5
29.92	116.92	12.7658	5.70904	132.771	101.069	5		128.458	33.3438	14.9118	169.86	87.0562	5
30	127.298	12.1097	5.41564	142.334	112.262	5		130.472	21.2075	9.4843	156.805	104.139	5
30.08	113.24	11.2915	5.04971	127.26	99.2198	5		123.77	12.6072	5.63812	139.424	108.116	5
30.17	122.664	10.4168	4.65854	135.598	109.73	5		127.22	18.6755	8.35194	150.409	104.031	5
30.25	126.894	8.02127	3.58722	136.854	116.934	5		125.012	10.137	4.5334	137.599	112.425	5
30.33	119.216	8.99191	4.02131	130.381	108.051	5		127.412	8.42356	3.76713	137.871	116.953	5
30.42	118.77	7.18359	3.2126	127.69	109.85	5		140.504	9.79323	4.37967	152.664	128.344	5
30.5	121.806	13.0154	5.82069	137.967	105.645	5		128.492	17.5054	7.82866	150.228	106.756	5
30.58	122.72	21.1359	9.45225	148.964	96.4763	5		124.876	14.8813	6.65514	143.354	106.398	5
30.67	114.836	20.4573	9.14879	140.237	89.4349	5		126.574	23.4776	10.4995	155.725	97.4228	5
30.75	117.272	18.8761	8.44166	140.71	93.8342	5		126.598	15.8463	7.08669	146.274	106.922	5
30.83	117.854	21.9036	9.79558	145.051	90.6571	5		121.514	20.4942	9.16527	146.961	96.0671	5
30.92	117.83	14.2898	6.3906	135.573	100.087	5		124.518	28.4383	12.718	159.829	89.2072	5
31	119.008	16.7269	7.4805	139.777	98.2388	5		119.622	26.1853	11.7104	152.135	87.1087	5
31.08	122.206	15.8664	7.09569	141.907	102.505	5		120.96	24.8364	11.1072	151.798	90.1215	5
31.17	118.18	15.6436	6.99605	137.604	98.7558	5		124.492	28.8687	12.9105	160.337	88.6467	5
31.25	108.984	18.5904	8.31388	132.067	85.901	5		122.554	22.7318	10.1659	150.779	94.3288	5
31.33	112.436	19.1277	8.55416	136.186	88.6858	5		120.182	25.9565	11.6081	152.411	87.9528	5
31.42	115.266	8.04023	3.5957	125.249	105.283	5		113.902	17.1868	7.68616	135.242	92.5618	5
31.5	119.942	15.7652	7.05041	139.517	100.367	5		107.81	21.6128	9.66553	134.646	80.9742	5
31.58	122.824	9.74567	4.3584	134.925	110.723	5		119.82	20.5341	9.18313	145.316	94.3235	5
31.67	120.518	16.5978	7.42275	141.127	99.9092	5		116.794	24.7818	11.0827	147.565	86.0234	5
31.75	122.926	14.5109	6.48948	140.944	104.908	5		120.164	21.9435	9.81342	147.41	92.9176	5
31.83	119.374	15.0319	6.72246	138.039	100.709	5		108.498	15.3918	6.88344	127.609	89.3865	5
31.92	112.132	5.85791	2.61974	119.406	104.858	5		108.358	17.8461	7.98101	130.517	86.1992	5
32	110.622	7.60414	3.40068	120.064	101.18	5		122.796	17.4987	7.82564	144.523	101.069	5
32.08	105.418	5.65247	2.52786	112.436	98.3995	5		120.664	24.9574	11.1613	151.653	89.6753	5
32.17	111.932	9.45754	4.22954	123.675	100.189	5		131.226	22.7687	10.1825	159.497	102.955	5
32.25	111.878	14.3603	6.42211	129.709	94.0474	5		134.016	21.7716	9.73654	161.049	106.983	5
32.33	120.666	9.66391	4.32183	132.665	108.667	5		129.4	16.121	7.20952	149.417	109.383	5
32.42	119.338	19.7813	8.84647	143.9	94.7763	5		123.126	9.33412	4.17434	134.716	111.536	5
32.5	115.666	20.2274	9.04596	140.782	90.5504	5		120.652	15.0199	6.71712	139.302	102.002	5
32.58	118.562	19.0255	8.50845	142.185	94.9387	5		122.804	23.3471	10.4411	151.793	93.8147	5
32.67	119.694	9.58375	4.28598	131.594	107.794	5		125.036	24.5183	10.9649	155.479	94.5926	5
32.75	119.224	20.7835	9.29465	145.03	93.4179	5		122.406	13.5111	6.04235	139.182	105.63	5
32.83	115.832	10.9274	4.88689	129.4	102.264	5		115.964	8.97411	4.01334	127.107	104.821	5
32.92	116.812	13.9609	6.2435	134.147	99.4773	5		118.312	12.6837	5.67232	134.061	102.563	5
33	115.856	4.18673	1.87236	121.055	110.657	5		127.086	17.9314	8.01914	149.351	104.821	5
33.08	119.27	10.253	4.58528	132.001	106.539	5		119.848	12.1681	5.44176	134.957	104.739	5
33.17	122.584	14.6148	6.53595	140.731	104.437	5		115.604	19.0488	8.51889	139.256	91.9518	5
33.25	116.048	11.3195	5.06225	130.103	101.993	5		106.298	20.2018	9.03452	131.382	81.2142	5
33.33	116.31	17.5991	7.87054	138.162	94.4579	5		120.56	10.7684	4.81579	133.931	107.189	5
33.42	112.214	6.9092	3.08989	120.793	103.635	5		120.66	13.1811	5.89477	137.026	104.294	5
33.5	114.824	14.3128	6.4009	132.596	97.0523	5		113.276	8.86418	3.96418	124.282	102.27	5
33.58	120.636	14.5571	6.51012	138.711	102.561	5		128.53	9.56074	4.27569	140.401	116.659	5
33.67	121.688	9.67295	4.32587	133.699	109.677	5		127.184	25.0727	11.2128	158.316	96.0522	5
33.75	116.058	12.7424	5.69856	131.88	100.236	5		125.442	12.478	5.58034	140.936	109.948	5
33.83	113.34	17.1954	7.69002	134.691	91.9891	5		139.178	20.6476	9.2339	164.815	113.541	5
33.92	118.988	13.0845	5.85155	135.235	102.741	5		127.77	18.533	8.28823	150.782	104.758	5
34	122.898	11.3417	5.07217	136.981	108.815	5		132.914	20.9221	9.35665	158.892	106.936	5
34.08	114.518	9.60567	4.29579	126.445	102.591	5		124.596	13.5897	6.07748	141.47	107.722	5
34.17	121.462	8.78456	3.92857	132.369	110.555	5		127.832	11.3386	5.07078	141.911	113.753	5
34.25	125.012	11.9595	5.34846	139.862	110.162	5		124.31	13.2773	5.9378	140.796	107.824	5
34.33	130.226	13.5856	6.07565	147.095	113.357	5		113.804	11.1465	4.98485	127.644	99.9638	5
34.42	120.536	13.1232	5.86887	136.831	104.241	5		121.276	8.26458	3.69603	131.538	111.014	5
34.5	118.164	9.23069	4.12809	129.625	106.703	5		128.728	13.6046	6.08417	145.62	111.836	5
34.58	117.25	14.4013	6.44046	135.132	99.3684	5		127.11	11.0361	4.93551	140.813	113.407	5
34.67	122.026	14.0801	6.29683	139.509	104.543	5		127.93	8.429	3.76956	138.396	117.464	5
34.75	114.042	14.6169	6.53686	132.191	95.8928	5		126.952	8.99247	4.02155	138.118	115.786	5
34.83	119.286	15.8163	7.07325	138.924	99.6475	5		127.718	17.1942	7.68949	149.067	106.369	5
34.92	114.706	9.69997	4.33796	126.75	102.662	5		106.644	22.9403	10.2592	135.128	78.1598	5
35	118.976	8.27585	3.70107	129.252	108.7	5		117.814	14.0595	6.28761	135.271	100.357	5
35.08	123.35	23.0755	10.3197	152.002	94.698	5		119.614	21.0309	9.40531	145.727	93.5007	5
35.17	123.534	17.0492	7.62465	144.703	102.365	5		118.724	12.3662	5.53032	134.079	103.369	5
35.25	117.56	8.32911	3.72489	127.902	107.218	5		126.31	16.7585	7.49464	147.118	105.502	5
35.33	118.196	11.2901	5.04908	132.215	104.177	5		121.298	13.0352	5.82952	137.483	105.113	5
35.42	118.712	16.0561	7.18053	138.648	98.7757	5		126.212	13.5972	6.08083	143.095	109.329	5
35.5	123.07	7.33405	3.27989	132.176	113.964	5		122.03	13.2898	5.94339	138.531	105.529	5
35.58	123.838	6.99397	3.1278	132.522	115.154	5		126.694	22.0025	9.83982	154.014	99.3743	5
35.67	124.16	7.39475	3.30703	133.342	114.978	5		123.466	16.1373	7.21683	143.503	103.429	5
35.75	117.698	13.3496	5.97012	134.274	101.122	5		123.32	9.52932	4.26164	135.152	111.488	5
35.83	121.026	15.459	6.91349	140.221	101.831	5		132.608	20.0769	8.97865	157.537	107.679	5
35.92	118.524	13.7626	6.1548	135.612	101.436	5		128.98	20.8129	9.30783	154.823	103.137	5
36	119.838	14.0008	6.26133	137.222	102.454	5		119.368	18.8459	8.42816	142.768	95.9677	5
36.08	126.89	11.9076	5.32524	141.675	112.105	5		121.802	20.9047	9.34886	147.759	95.8454	5
36.17	115.594	19.5543	8.74494	139.874	91.3141	5		117.75	26.0132	11.6335	150.05	85.4503	5
36.25	117.85	21.532	9.6294	144.586	91.1145	5		124.598	25.0435	11.1998	155.694	93.5024	5
36.33	122.492	14.5206	6.49382	140.522	104.462	5		116.87	26.9148	12.0367	150.289	83.4509	5
36.42	119.538	11.1554	4.98887	133.389	105.687	5		129.972	28.1741	12.5998	164.955	94.9892	5
36.5	112.892	12.5967	5.63342	128.533	97.2511	5		126.608	12.4464	5.56621	142.062	111.154	5
36.58	116.69	11.8801	5.31294	131.441	101.939	5		121.654	15.6165	6.98391	141.044	102.264	5
36.67	113.742	12.176	5.44527	128.861	98.6235	5		123.634	24.9964	11.1787	154.671	92.5969	5
36.75	118.97	7.14198	3.19399	127.838	110.102	5		125.356	35.1941	15.7393	169.055	81.6567	5
36.83	109.658	10.514	4.702	122.713	96.6031	5		122.36	21.8172	9.75693	149.45	95.2704	5
36.92	105.59	15.2827	6.83461	124.566	86.6141	5		115.81	24.3897	10.9074	146.094	85.5262	5
37	104.946	15.9307	7.12444	124.727	85.1654	5		116.692	25.8653	11.5673	148.808	84.576	5
37.08	103.278	19.4588	8.70225	127.439	79.1167	5		113.688	31.7567	14.202	153.119	74.2568	5
37.17	112.416	20.3092	9.08254	137.633	87.1988	5		114.494	20.2599	9.06049	139.65	89.3381	5
37.25	108.616	19.3698	8.66244	132.667	84.5652	5		121.102	16.279	7.28018	141.315	100.889	5
37.33	109.086	10.7666	4.81497	122.454	95.7175	5		110.516	20.2965	9.07686	135.717	85.3146	5
37.42	108.69	13.1024	5.85958	124.959	92.4212	5		107.238	20.134	9.00419	132.238	82.2384	5
37.5	101.1	13.7043	6.12876	118.116	84.0838	5		111.034	29.0569	12.9947	147.113	74.955	5
37.58	104.666	11.6843	5.2254	119.174	90.158	5		109.986	11.8197	5.28592	124.662	95.3099	5
37.67	102.034	11.7236	5.24295	116.591	87.4772	5		105.882	8.25861	3.69336	116.136	95.6276	5
37.75	103.556	8.31803	3.71993	113.884	93.2278	5		97.014	5.8407	2.61204	104.266	89.7618	5
37.83	98.562	6.04049	2.70139	106.062	91.0617	5		97.678	10.8381	4.84696	111.135	84.2207	5
37.92	99.834	13.018	5.82184	115.998	83.67	5		92.488	3.40289	1.52182	96.7132	88.2628	5
38	96.766	8.41516	3.76337	107.215	86.3172	5		89.77	7.09674	3.17376	98.5818	80.9582	5
38.08	102.272	8.19539	3.66509	112.448	92.0961	5		88.058	8.86945	3.96654	99.0709	77.0451	5
38.17	105.962	19.9179	8.90757	130.693	81.2306	5		93.308	13.9728	6.24882	110.658	75.9585	5
38.25	103.954	13.4023	5.99371	120.595	87.3128	5		110.992	13.3282	5.96057	127.541	94.4428	5
38.33	97.024	10.8536	4.85388	110.501	83.5475	5		96.632	6.97293	3.11839	105.29	87.974	5
38.42	100.368	6.87916	3.07645	108.91	91.8264	5		99.002	10.4545	4.67539	111.983	86.021	5
38.5	101.872	11.2232	5.01916	115.807	87.9366	5		98.102	20.2195	9.04241	123.208	72.9962	5
38.58	100.688	11.2303	5.02232	114.632	86.7438	5		96.376	17.0897	7.64275	117.596	75.1563	5
38.67	105.876	13.0227	5.82394	122.046	89.7061	5		95.164	11.7806	5.26844	109.792	80.5365	5
38.75	100.534	13.2246	5.9142	116.954	84.1135	5		96.002	10.5516	4.71881	109.104	82.9005	5
38.83	108.754	16.8359	7.52926	129.659	87.8494	5		101.284	13.4568	6.01804	117.993	84.5752	5
38.92	95.106	19.5992	8.76503	119.442	70.7704	5		98.59	10.7183	4.79337	111.899	85.2815	5
39	96.246	16.6591	7.45016	116.931	75.561	5		103.636	8.30812	3.7155	113.952	93.3201	5
39.08	101.684	11.4322	5.11265	115.879	87.489	5		97.966	8.12151	3.63205	108.05	87.8818	5
39.17	105.64	21.3244	9.53658	132.118	79.1622	5		95.936	6.07757	2.71797	103.482	88.3897	5
39.25	106.17	21.7384	9.72171	133.162	79.1782	5		95.39	9.82434	4.39358	107.589	83.1915	5
39.33	104.318	18.3972	8.2275	127.161	81.4748	5		99.706	14.0321	6.27536	117.129	82.2828	5
39.42	109.044	13.7406	6.14498	126.105	91.9828	5		109.156	13.9314	6.23033	126.454	91.8578	5
39.5	102.742	14.2308	6.36421	120.412	85.0721	5		105.18	11.8472	5.29821	119.89	90.4698	5
39.58	109.484	17.3192	7.74539	130.989	87.9793	5		109.956	21.5646	9.64399	136.732	83.18	5
39.67	99.416	10.9134	4.8806	112.967	85.8653	5		107.658	11.1389	4.98147	121.489	93.8272	5
39.75	109.892	19.479	8.71128	134.078	85.7056	5		105.82	7.76609	3.4731	115.463	96.1771	5
39.83	95.63	7.54144	3.37264	104.994	86.2661	5		107.31	6.12759	2.74034	114.918	99.7016	5
39.92	89.174	8.02497	3.58887	99.1383	79.2097	5		105.944	8.37162	3.7439	116.339	95.5493	5
40	90.992	9.0211	4.03436	102.193	79.7908	5		112.89	26.6482	11.9174	145.978	79.8019	5
40.08	88.102	6.23768	2.78958	95.8471	80.3569	5		102.818	19.7775	8.84477	127.375	78.261	5
40.17	92.802	10.2113	4.56663	105.481	80.123	5		100.404	13.4026	5.99384	117.046	83.7624	5
40.25	91.892	7.32023	3.27371	100.981	82.8027	5		92.252	8.41018	3.76115	102.695	81.8094	5
40.33	89.79	12.6392	5.65243	105.484	74.0963	5		93.348	12.0669	5.39649	108.331	78.3649	5
40.42	94.688	8.78255	3.92768	105.593	83.783	5		93.916	13.1676	5.88873	110.266	77.5663	5
40.5	103.036	15.14	6.77082	121.835	84.2372	5		95.218	15.0977	6.75191	113.964	76.4717	5
40.58	95.338	11.7518	5.25558	109.93	80.7462	5		99.78	15.6946	7.01883	119.267	80.2926	5
40.67	91.588	17.38	7.77259	113.168	70.0078	5		95.62	11.4296	5.11147	109.812	81.4283	5
40.75	96.204	10.4703	4.68248	109.205	83.2034	5		102.626	19.0329	8.51176	126.258	78.9936	5
40.83	91.322	11.3061	5.05625	105.36	77.2836	5		95.834	10.0619	4.49981	108.327	83.3405	5
40.92	85.696	7.95977	3.55972	95.5794	75.8126	5		93.196	7.34495	3.28476	102.316	84.076	5
41	87.034	10.7943	4.82734	100.437	73.6311	5		90.882	11.1208	4.97339	104.69	77.0737	5
41.08	99.918	22.4893	10.0575	127.842	71.9938	5		89.674	5.87039	2.62532	96.963	82.385	5
41.17	97.036	16.3796	7.32517	117.374	76.6981	5		98.838	11.737	5.24895	113.411	84.2646	5
41.25	95.104	16.6037	7.42541	115.72	74.4878	5		92.614	16.0174	7.16322	112.502	72.7257	5
41.33	96.362	24.2028	10.8238	126.414	66.3102	5		93.982	12.3411	5.51911	109.305	78.6585	5
41.42	92.826	17.553	7.84993	114.621	71.0311	5		88.506	8.73515	3.90648	99.3521	77.6599	5
41.5	86.954	5.77639	2.58328	94.1263	79.7817	5		96.524	12.2962	5.49903	111.792	81.2563	5
41.58	92.402	8.07825	3.6127	102.432	82.3715	5		94.924	11.4292	5.1113	109.115	80.7327	5
41.67	87.67	10.5428	4.71487	100.761	74.5794	5		100.056	19.225	8.59766	123.927	76.1851	5
41.75	93.272	10.434	4.66622	106.227	80.3165	5		96.538	16.6359	7.43978	117.194	75.8819	5
41.83	92.488	11.4948	5.14062	106.761	78.2154	5		112.446	18.5034	8.27496	135.421	89.471	5
41.92	99.46	25.7961	11.5364	131.49	67.4299	5		107.784	15.2601	6.82453	126.732	88.8361	5
42	100.41	30.8349	13.7898	138.697	62.1234	5		108.29	18.483	8.26584	131.24	85.3404	5
42.08	110.444	12.3983	5.54468	125.838	95.0495	5		103.484	10.3382	4.62336	116.321	90.6475	5
42.17	107.464	17.5409	7.84454	129.244	85.6841	5		98.346	10.1284	4.52955	110.922	85.7699	5
42.25	101.476	11.7833	5.26965	116.107	86.8451	5		95.182	10.2412	4.58002	107.898	82.4658	5
42.33	95.948	16.7483	7.49009	116.744	75.1522	5		93.234	5.93324	2.65343	100.601	85.8669	5
42.42	91.328	11.9755	5.35561	106.198	76.4585	5		98.17	3.9977	1.78783	103.134	93.2062	5
42.5	96.934	7.52797	3.36661	106.281	87.5868	5		98.244	8.52059	3.81052	108.824	87.6643	5
42.58	90.82	4.48889	2.00749	96.3937	85.2463	5		93.4	8.44385	3.77621	103.884	82.9156	5
42.67	85.424	11.5199	5.15186	99.7278	71.1202	5		101.806	9.98357	4.46479	114.202	89.4098	5
42.75	87.884	4.17897	1.86889	93.0729	82.6951	5		94.636	5.11578	2.28785	100.988	88.2839	5
42.83	82.394	6.6853	2.98976	90.6949	74.0931	5		92.2	11.2171	5.01645	106.128	78.2721	5
42.92	90.832	12.4167	5.55292	106.249	75.4146	5		98.994	14.3233	6.40558	116.779	81.2093	5
43	91.296	26.1891	11.7121	123.814	58.7779	5		93.252	15.095	6.75071	111.995	74.509	5
43.08	90.868	13.6335	6.0971	107.796	73.9397	5		105.12	33.7027	15.0723	146.967	63.2725	5
43.17	99.66	22.1509	9.90619	127.164	72.156	5		100.32	13.4713	6.02456	117.047	83.5931	5
43.25	100.258	14.9452	6.68368	118.815	81.7011	5		101.164	19.3509	8.65398	125.191	77.1367	5
43.33	94.604	12.4084	5.54922	110.011	79.1969	5		94.83	8.5699	3.83257	105.471	84.1891	5
43.42	86.884	7.04175	3.14917	95.6275	78.1405	5		93.516	5.70398	2.5509	100.598	86.4336	5
43.5	90.558	12.6769	5.66929	106.298	74.8175	5		98.734	13.1971	5.90191	115.12	82.3477	5
43.58	88.008	6.68028	2.98751	96.3027	79.7133	5		98.184	10.2835	4.59892	110.953	85.4154	5
43.67	93.224	6.67626	2.98572	101.514	84.9343	5		117.528	11.9868	5.36066	132.412	102.644	5
43.75	93.558	12.0121	5.37198	108.473	78.643	5		102.276	13.1576	5.88426	118.613	85.9387	5
43.83	93.794	13.6173	6.08984	110.702	76.8859	5		108.286	19.5751	8.75426	132.592	83.9803	5
43.92	89.642	6.48182	2.89876	97.6902	81.5938	5		116.366	22.5111	10.0673	144.317	88.4147	5
44	90.238	10.6897	4.78057	103.511	76.965	5		106.668	16.5653	7.40821	127.236	86.0995	5
44.08	91.242	13.5114	6.04247	108.019	74.4654	5		111.036	29.5618	13.2204	147.742	74.3302	5
44.17	87.48	9.10345	4.07119	98.7834	76.1766	5		104.014	17.6998	7.91557	125.991	82.0368	5
44.25	94.606	11.7101	5.23694	109.146	80.0659	5		114.602	13.3092	5.95205	131.128	98.0765	5
44.33	94.42	15.511	6.93672	113.679	75.1606	5		106.016	6.46805	2.8926	114.047	97.9848	5
44.42	97.086	21.9669	9.82391	124.362	69.8105	5		114.818	15.6189	6.98499	134.211	95.4246	5
44.5	98.152	14.8646	6.64765	116.609	79.6952	5		105.69	11.4154	5.10512	119.864	91.5159	5
44.58	99.036	15.4043	6.88902	118.163	79.909	5		100.488	23.8266	10.6556	130.073	70.9034	5
44.67	99.674	17.2039	7.6938	121.035	78.3126	5		105.6	23.8436	10.6632	135.206	75.9942	5
44.75	104.41	25.0526	11.2039	135.517	73.303	5		101.378	23.1001	10.3307	130.061	72.6955	5
44.83	102.632	19.5312	8.73463	126.883	78.3808	5		93.34	8.256	3.6922	103.591	83.0888	5
44.92	99.484	18.8098	8.41198	122.839	76.1286	5		96.854	9.05785	4.05079	108.101	85.6072	5
45	93.67	11.2893	5.04875	107.688	79.6524	5		96.076	9.10826	4.07334	107.385	84.7666	5
45.08	90.178	9.94211	4.44625	102.523	77.8332	5		105.788	13.8591	6.19798	122.996	88.5796	5
45.17	96.352	10.2199	4.57047	109.042	83.6624	5		98.81	19.5021	8.72159	123.025	74.595	5
45.25	98.966	10.8642	4.85862	112.456	85.4763	5		99.408	18.0356	8.06574	121.802	77.0139	5
45.33	103.476	15.0673	6.73828	122.184	84.7675	5		100.238	13.7775	6.16147	117.345	83.131	5
45.42	109.216	14.4425	6.45886	127.149	91.2833	5		94.862	5.67863	2.53956	101.913	87.811	5
45.5	101.056	14.1846	6.34354	118.668	83.4435	5		94.72	6.13135	2.74202	102.333	87.1069	5
45.58	92.016	8.53183	3.81555	102.61	81.4223	5		92.124	10.1269	4.52887	104.698	79.5498	5
45.67	91.672	12.8832	5.76156	107.669	75.6754	5		95.72	7.2925	3.26131	104.775	86.6652	5
45.75	99.154	15.025	6.71938	117.81	80.498	5		96.758	7.77119	3.47538	106.407	87.1088	5
45.83	98.664	12.1159	5.4184	113.708	83.6201	5		92.646	8.21754	3.675	102.849	82.4426	5
45.92	95.816	14.0081	6.26462	113.209	78.4226	5		104.656	24.3003	10.8674	134.829	74.4832	5
46	93.964	14.6797	6.56496	112.191	75.7368	5		102.04	16.0178	7.16336	121.929	82.1513	5
46.08	95.87	19.5455	8.741	120.139	71.6011	5		106.532	14.8216	6.62841	124.935	88.1286	5
46.17	99.038	21.1838	9.4737	125.341	72.7348	5		116.738	21.4285	9.58313	143.345	90.131	5
46.25	103.462	20.2286	9.04648	128.579	78.3449	5		117.086	17.1563	7.67252	138.388	95.7837	5
46.33	102.968	15.483	6.92419	122.193	83.7434	5		118.092	19.5691	8.75155	142.39	93.7938	5
46.42	91.312	12.1921	5.45248	106.451	76.1735	5		113.614	22.219	9.93662	141.202	86.0255	5
46.5	93.362	7.43457	3.32484	102.593	84.1308	5		105.352	17.7321	7.93004	127.369	83.3347	5
46.58	93.024	15.58	6.96758	112.369	73.6789	5		105.85	14.9696	6.69462	124.437	87.2627	5
46.67	98.978	18.3298	8.19732	121.737	76.2186	5		107.962	7.84459	3.50821	117.702	98.2217	5
46.75	95.376	15.3559	6.86739	114.443	76.3091	5		97.328	4.46835	1.99831	102.876	91.7798	5
46.83	98.636	17.9331	8.01994	120.903	76.3691	5		99.454	10.6414	4.75898	112.667	86.2409	5
46.92	95.964	10.8236	4.84047	109.403	82.5247	5		104.284	15.7127	7.02692	123.794	84.7742	5
47	99.954	18.2428	8.15844	122.605	77.3025	5		101.046	8.76472	3.9197	111.929	90.1632	5
47.08	101.076	17.4258	7.79306	122.713	79.439	5		94.258	7.53581	3.37012	103.615	84.9011	5
47.17	110.858	15.4973	6.93058	130.1	91.6156	5		101.85	16.0302	7.1689	121.754	81.9459	5
47.25	113.84	17.0737	7.63561	135.04	92.6401	5		109.492	16.504	7.38081	129.984	88.9996	5
47.33	111.374	19.8455	8.87518	136.015	86.7325	5		101.82	12.76	5.70646	117.664	85.9763	5
47.42	108.01	13.7436	6.14631	125.075	90.9451	5		103.988	12.9742	5.80222	120.098	87.8785	5
47.5	109.682	26.3682	11.7922	142.422	76.9415	5		106.424	11.6313	5.20167	120.866	91.9818	5
47.58	99.55	15.7237	7.03185	119.074	80.0264	5		111.426	8.84061	3.95364	122.403	100.449	5
47.67	106.066	20.2749	9.06722	131.241	80.8913	5		109.222	15.8829	7.10304	128.943	89.5008	5
47.75	98.65	22.1737	9.91639	126.182	71.1177	5		116.026	15.5277	6.9442	135.306	96.7458	5
47.83	99.026	20.0503	8.96679	123.922	74.1302	5		109.148	16.9292	7.57096	130.168	88.1276	5
47.92	102.474	21.8399	9.76708	129.592	75.3562	5		107.37	17.3245	7.74776	128.881	85.8588	5

## Sheet: Supplementary Figure 1B
			Baseline							+ Tamoxifen						Diastolic BP day	Control	Stim1 smKO + vehicle		Diastolic BP night	Control	Stim1 smKO + vehicle
Time (h)	Mean	SD	SEM	Upper limit	Lower limit	N		Mean	SD	SEM	Upper limit	Lower limit	N			Mouse 1	93.3682	94.129		Mouse 1	106.527	113.442
0	84.718	19.6188	8.77379	109.078	60.358	5		95.188	17.1283	7.66	116.456	73.9204	5			Mouse 2	68.0939	72.0592		Mouse 2	81.4039	83.155
0.08	84.766	19.1079	8.54531	108.492	61.0404	5		91.84	20.2323	9.04815	116.962	66.7183	5			Mouse 3	73.1194	76.202		Mouse 3	96.1636	95.5895
0.17	80.44	19.6953	8.808	104.895	55.9851	5		91.48	14.8138	6.62495	109.874	73.0862	5			Mouse 4	63.7943	73.4427		Mouse 4	74.9007	86.2913
0.25	74.41	18.4143	8.23512	97.2744	51.5456	5		81.452	11.2234	5.01926	95.3877	67.5163	5			Mouse 5	73.6846	74.2157		Mouse 5	87.4938	83.9129
0.33	79.908	27.1119	12.1248	113.572	46.2442	5		76.672	11.65	5.21002	91.1373	62.2067	5
0.42	85.834	25.1603	11.252	117.075	54.5934	5		75.048	18.9897	8.49246	98.6268	51.4692	5		Paired t test				Paired t test
0.5	79.256	20.703	9.25867	104.962	53.5498	5		84.168	19.1734	8.57462	107.975	60.361	5		P value	0.0947			P value	0.3004
0.58	84.452	17.1089	7.65134	105.696	63.2085	5		82.868	22.9755	10.2749	111.396	54.3402	5		Significantly different (P < 0.05)?	No			Significantly different (P < 0.05)?	No
0.67	81.156	9.98848	4.46698	93.5583	68.7537	5		92.468	20.6522	9.23597	118.111	66.8248	5		One- or two-tailed P value?	Two-tailed			One- or two-tailed P value?	Two-tailed
0.75	80.79	9.76775	4.36827	92.9183	68.6617	5		86.424	27.2612	12.1916	120.273	52.5748	5
0.83	84.71	8.47799	3.79147	95.2368	74.1832	5		81.454	14.69	6.56959	99.6941	63.2139	5		Mean of differences (B - A)	3.598			Mean of differences (B - A)	3.18
0.92	82.358	3.75742	1.68037	87.0234	77.6926	5		85.928	15.2378	6.81457	104.848	67.0077	5		SD of differences	3.69			SD of differences	5.984
1	85.762	14.4828	6.47689	103.745	67.7793	5		76.566	16.989	7.59772	97.6607	55.4713	5		SEM of differences	1.65			SEM of differences	2.676
1.08	88.58	23.187	10.3696	117.371	59.7895	5		86.796	18.9383	8.46946	110.311	63.281	5		95% confidence interval	-0.9841 to 8.179			95% confidence interval	-4.249 to 10.61
1.17	88.516	17.4002	7.78162	110.121	66.9108	5		93.376	11.7451	5.25255	107.959	78.7926	5
1.25	90.848	22.3603	9.99984	118.612	63.084	5		94.852	11.8345	5.29254	109.546	80.1576	5
1.33	90.208	22.8	10.1965	118.518	61.8981	5		98.648	14.0196	6.26977	116.056	81.2403	5
1.42	92.632	13.4533	6.0165	109.336	75.9275	5		102.942	10.6309	4.75429	116.142	89.742	5
1.5	93.296	15.1789	6.78821	112.143	74.4489	5		97.202	6.45944	2.88875	105.222	89.1815	5
1.58	94.474	15.6003	6.97666	113.844	75.1037	5		91.312	18.3751	8.21758	114.128	68.4963	5
1.67	91.99	15.2967	6.84087	110.983	72.9967	5		95.596	14.7213	6.58355	113.875	77.3171	5
1.75	91.292	11.6961	5.23064	105.815	76.7694	5		102.688	18.8162	8.41487	126.051	79.3246	5
1.83	90.114	8.52139	3.81088	100.695	79.5333	5		102.516	14.762	6.60174	120.845	84.1866	5
1.92	90.61	11.5225	5.15304	104.917	76.3029	5		95.446	11.0712	4.95121	109.193	81.6992	5
2	95.158	14.7296	6.5873	113.447	76.8687	5		95.428	12.4513	5.56839	110.888	79.9677	5
2.08	90.09	16.8577	7.53898	111.022	69.1584	5		100.64	11.6617	5.21529	115.12	86.16	5
2.17	91.556	17.1707	7.67897	112.876	70.2357	5		93.632	13.0717	5.84585	109.863	77.4013	5
2.25	93.098	13.1589	5.88482	109.437	76.7591	5		96.428	8.3817	3.74841	106.835	86.0207	5
2.33	88.58	11.3254	5.06485	102.642	74.5177	5		99.314	11.2582	5.03483	113.293	85.3351	5
2.42	88.532	8.91329	3.98614	99.5993	77.4647	5		101.29	16.5626	7.40702	121.855	80.7248	5
2.5	89.828	9.29253	4.15575	101.366	78.2898	5		89.66	13.9873	6.25531	107.028	72.2925	5
2.58	98.348	20.4437	9.14271	123.732	72.9638	5		92.026	10.8772	4.86442	105.532	78.5202	5
2.67	90.828	19.2106	8.59123	114.681	66.9749	5		95.316	29.3624	13.1313	131.774	58.8577	5
2.75	89.702	18.3175	8.19182	112.446	66.9579	5		76.312	11.4516	5.1213	90.531	62.093	5
2.83	88.678	19.5585	8.74683	112.963	64.3929	5		82.23	11.3035	5.05508	96.2652	68.1948	5
2.92	85.996	23.2536	10.3993	114.869	57.1229	5		90.516	17.5978	7.86998	112.367	68.6654	5
3	83.328	20.3341	9.09368	108.576	58.0799	5		82.4	18.8758	8.4415	105.837	58.9626	5
3.08	87.034	22.0305	9.85232	114.388	59.6796	5		89.734	14.784	6.6116	108.091	71.3773	5
3.17	81.596	19.7674	8.84025	106.14	57.0515	5		92.914	15.5286	6.9446	112.195	73.6327	5
3.25	84.926	18.1557	8.11945	107.469	62.3828	5		88.322	21.5984	9.65911	115.14	61.504	5
3.33	84.282	16.2007	7.24515	104.398	64.1662	5		87.234	26.0092	11.6317	119.529	54.9393	5
3.42	92.372	14.6884	6.56885	110.61	74.1339	5		92.994	12.1027	5.4125	108.022	77.9665	5
3.5	88.228	9.44373	4.22337	99.9539	76.5021	5		94.296	19.5125	8.72628	118.524	70.068	5
3.58	88.266	10.5593	4.72226	101.377	75.1549	5		95.684	28.4111	12.7058	130.961	60.407	5
3.67	88.788	11.0201	4.92833	102.471	75.1048	5		86.032	17.7169	7.92326	108.03	64.0335	5
3.75	92.352	8.72165	3.90044	103.181	81.5226	5		83.336	9.96311	4.45564	95.7068	70.9652	5
3.83	89.832	16.0818	7.19198	109.8	69.8639	5		97.922	22.5568	10.0877	125.93	69.9141	5
3.92	96.652	23.0341	10.3012	125.253	68.0514	5		88.786	14.233	6.36521	106.459	71.1133	5
4	97.318	19.4171	8.6836	121.428	73.2084	5		99.094	13.9795	6.25181	116.452	81.7362	5
4.08	94.14	10.663	4.76865	107.38	80.9001	5		101.948	11.2053	5.01117	115.861	88.0348	5
4.17	99.854	8.04004	3.59562	109.837	89.871	5		95.824	16.2512	7.26776	116.003	75.6455	5
4.25	100.162	22.3301	9.98633	127.888	72.4355	5		96.384	11.8528	5.30072	111.101	81.6668	5
4.33	89.612	10.6773	4.77504	102.87	76.3543	5		99.698	17.5834	7.86354	121.531	77.8653	5
4.42	88.65	8.62561	3.85749	99.3601	77.9399	5		92.12	23.5428	10.5287	121.352	62.8877	5
4.5	92.222	10.259	4.58798	104.96	79.4837	5		94.328	21.4456	9.59078	120.956	67.6997	5
4.58	94.672	11.9268	5.33381	109.481	79.863	5		91.646	13.781	6.16303	108.757	74.5347	5
4.67	95.5	13.7883	6.16631	112.62	78.3796	5		97.262	17.9606	8.03221	119.563	74.961	5
4.75	87.674	11.4807	5.13434	101.929	73.4188	5		94.614	19.1896	8.58183	118.441	70.787	5
4.83	82.59	6.21666	2.78018	90.309	74.871	5		90.08	16.6393	7.4413	110.74	69.4196	5
4.92	85.328	13.7348	6.14238	102.382	68.274	5		95.074	11.6905	5.22814	109.59	80.5584	5
5	86.776	25.2656	11.2991	118.147	55.4046	5		96.18	24.5573	10.9824	126.672	65.6881	5
5.08	90.632	23.5722	10.5418	119.901	61.3632	5		94.444	12.0995	5.41107	109.468	79.4205	5
5.17	87.53	16.9485	7.57961	108.574	66.4856	5		92.32	18.6133	8.32411	115.431	69.2086	5
5.25	86.778	18.2849	8.17728	109.482	64.0742	5		87.07	14.5704	6.51607	105.162	68.9785	5
5.33	95.986	9.02429	4.03578	107.191	84.7809	5		85.926	18.0769	8.08424	108.371	63.4806	5
5.42	95.598	21.5802	9.65098	122.393	68.8026	5		84.884	26.1624	11.7002	117.369	52.3991	5
5.5	94.246	14.6962	6.57233	112.494	75.9983	5		86.622	20.2832	9.07093	111.807	61.4371	5
5.58	87.904	16.9678	7.58824	108.972	66.8357	5		85.856	22.6842	10.1447	114.022	57.6898	5
5.67	92.632	16.8456	7.53357	113.549	71.7155	5		87.998	20.5311	9.1818	113.491	62.5052	5
5.75	89.748	17.9358	8.02113	112.018	67.4778	5		86.502	16.7052	7.47079	107.244	65.7597	5
5.83	90.452	8.87201	3.96768	101.468	79.4359	5		85.512	17.9615	8.03262	107.814	63.2099	5
5.92	92.844	9.27106	4.14614	104.356	81.3325	5		74.968	5.48918	2.45483	81.7837	68.1523	5
6	101.158	14.7878	6.6133	119.519	82.7965	5		91.27	32.5885	14.574	131.734	50.8061	5
6.08	91.146	15.0107	6.71298	109.784	72.5078	5		86.826	28.4121	12.7063	122.104	51.5477	5
6.17	88.092	5.58864	2.49931	95.0312	81.1528	5		95.028	20.3844	9.11617	120.339	69.7174	5
6.25	88.688	16.014	7.16167	108.572	68.804	5		94.492	24.4446	10.932	124.844	64.14	5
6.33	88.04	13.2877	5.94244	104.539	71.5411	5		94.114	21.9846	9.8318	121.411	66.8165	5
6.42	93.21	14.33	6.40859	111.003	75.4169	5		97.986	23.3624	10.448	126.994	68.9777	5
6.5	95.53	6.57051	2.93842	103.688	87.3716	5		96.166	20.9074	9.35008	122.126	70.206	5
6.58	90.218	15.404	6.88886	109.345	71.0915	5		105.894	27.1834	12.1568	139.647	72.1413	5
6.67	85.878	11.0529	4.94302	99.602	72.154	5		104.332	12.944	5.78872	120.404	88.2599	5
6.75	84.21	11.9072	5.32506	98.9947	69.4253	5		98.86	17.5897	7.86634	120.7	77.0195	5
6.83	85.242	12.0109	5.37142	100.155	70.3286	5		98.306	17.1509	7.6701	119.602	77.0104	5
6.92	91.154	19.6193	8.77402	115.515	66.7934	5		102.36	22.4232	10.028	130.202	74.5179	5
7	93.13	24.1059	10.7805	123.061	63.1986	5		98.656	15.9363	7.12691	118.443	78.8685	5
7.08	84.104	16.7824	7.50533	104.942	63.2659	5		90.006	10.2913	4.60243	102.784	77.2276	5
7.17	79.342	12.3424	5.5197	94.6672	64.0168	5		84.446	4.74016	2.11986	90.3317	78.5603	5
7.25	86.164	15.3796	6.87797	105.26	67.0677	5		94.412	25.3705	11.346	125.914	62.9104	5
7.33	83.342	11.6654	5.21692	97.8265	68.8575	5		90.984	32.1811	14.3918	130.942	51.0259	5
7.42	82.5	7.79361	3.48541	92.177	72.823	5		85.02	34.5154	15.4358	127.877	42.1635	5
7.5	91.232	16.1551	7.2248	111.291	71.1728	5		88.312	29.4025	13.1492	124.82	51.804	5
7.58	81.974	20.31	9.08289	107.192	56.7558	5		80.996	23.8846	10.6815	110.653	51.3394	5
7.67	89.002	18.5285	8.2862	112.008	65.9958	5		91.568	28.9802	12.9603	127.552	55.5844	5
7.75	89.66	24.0882	10.7725	119.569	59.7506	5		91.946	22.9408	10.2595	120.431	63.4612	5
7.83	80.41	16.1291	7.21317	100.437	60.383	5		80.468	15.5253	6.94314	99.7452	61.1908	5
7.92	80.926	11.4756	5.13204	95.1748	66.6772	5		89.088	20.0041	8.9461	113.926	64.2496	5
8	84.456	14.1748	6.33915	102.056	66.8557	5		89.078	21.2635	9.50934	115.48	62.6758	5
8.08	89.226	14.9392	6.68099	107.775	70.6766	5		83.95	17.3403	7.75483	105.481	62.4192	5
8.17	90.88	20.022	8.95409	115.741	66.0195	5		73.3	9.51935	4.25718	85.1198	61.4802	5
8.25	86.028	22.5375	10.0791	114.012	58.044	5		79.292	15.6231	6.98686	98.6906	59.8934	5
8.33	91.366	17.2499	7.71441	112.785	69.9474	5		87.462	20.7035	9.25889	113.169	61.7552	5
8.42	95.1	21.9412	9.81239	122.344	67.8564	5		96.33	8.50035	3.80147	106.885	85.7754	5
8.5	90.064	19.4085	8.67973	114.163	65.9652	5		103.646	15.8675	7.09616	123.348	83.9439	5
8.58	85.856	14.5849	6.52257	103.966	67.7465	5		105.94	28.4599	12.7276	141.278	70.6024	5
8.67	91.694	12.198	5.45509	106.84	76.5482	5		104.426	31.8484	14.243	143.971	64.881	5
8.75	83.586	14.2016	6.35117	101.22	65.9523	5		93.464	23.1918	10.3717	122.26	64.6675	5
8.83	90.43	14.0493	6.28303	107.874	72.9855	5		91.482	29.1201	13.0229	127.639	55.3246	5
8.92	90.778	12.8165	5.73171	106.692	74.8642	5		87.522	19.6843	8.80308	111.963	63.0807	5
9	90.738	14.1296	6.31893	108.282	73.1938	5		96.102	19.8059	8.85748	120.694	71.5097	5
9.08	83.098	7.2751	3.25352	92.1312	74.0648	5		86.732	17.3185	7.74505	108.236	65.2283	5
9.17	86.078	12.0402	5.38454	101.028	71.1281	5		86.966	20.347	9.09947	112.23	61.7018	5
9.25	94.936	21.8186	9.75757	122.027	67.8446	5		84.556	21.408	9.57395	111.138	57.9744	5
9.33	96.58	18.7955	8.4056	119.918	73.2423	5		87.27	13.6732	6.11482	104.247	70.2925	5
9.42	88.448	25.5603	11.4309	120.185	56.7107	5		81.572	11.6019	5.18852	95.9776	67.1664	5
9.5	94.286	25.3385	11.3317	125.748	62.824	5		97.202	22.2266	9.94004	124.8	69.604	5
9.58	88.736	22.3402	9.99082	116.475	60.997	5		92.072	13.1686	5.88919	108.423	75.721	5
9.67	94.912	20.0314	8.95831	119.784	70.0398	5		91.382	6.25621	2.79786	99.1501	83.6139	5
9.75	84.108	9.47163	4.23584	95.8686	72.3474	5		84.646	18.5388	8.29079	107.665	61.6271	5
9.83	84.79	13.5945	6.07965	101.67	67.9102	5		95.516	18.2078	8.14276	118.124	72.9081	5
9.92	97.416	25.3376	11.3313	128.877	65.9552	5		97.754	17.6132	7.87687	119.624	75.8843	5
10	91.484	14.7165	6.58143	109.757	73.211	5		96.108	16.9389	7.57529	117.14	75.0756	5
10.08	87.222	12.7693	5.71059	103.077	71.3669	5		86.606	17.0128	7.60836	107.73	65.4818	5
10.17	85.812	18.627	8.33025	108.94	62.6835	5		84.864	14.7861	6.61254	103.223	66.5047	5
10.25	92.034	18.4757	8.2626	114.975	69.0934	5		90.262	18.4212	8.2382	113.135	67.3891	5
10.33	92.096	9.36512	4.18821	103.724	80.4677	5		99.604	25.7931	11.535	131.63	67.5776	5
10.42	94.144	17.1355	7.66322	115.421	72.8675	5		92.648	21.3332	9.54049	119.137	66.1594	5
10.5	93.75	15.4965	6.93024	112.991	74.5086	5		88.156	12.9891	5.8089	104.284	72.0279	5
10.58	87.312	8.66325	3.87432	98.0688	76.5552	5		88.308	9.04759	4.04621	99.5421	77.0739	5
10.67	91.788	13.576	6.07137	108.645	74.9312	5		101.22	17.8463	7.9811	123.379	79.0609	5
10.75	82.086	11.5645	5.17181	96.4453	67.7267	5		84.64	14.6712	6.56117	102.857	66.4233	5
10.83	88.946	11.4859	5.13664	103.208	74.6844	5		84.814	19.7578	8.83598	109.347	60.2814	5
10.92	88.47	16.6559	7.44877	109.151	67.7889	5		87.01	20.6732	9.24535	112.679	61.3408	5
11	93.058	15.517	6.9394	112.325	73.7911	5		89.536	17.9098	8.00951	111.774	67.298	5
11.08	96.18	18.963	8.48051	119.726	72.6343	5		91.516	17.8826	7.99734	113.72	69.3118	5
11.17	96.446	15.7326	7.03582	115.981	76.9114	5		90.02	16.6123	7.42925	110.647	69.3931	5
11.25	90.632	15.5601	6.95867	109.952	71.3116	5		90.802	5.67709	2.53887	97.851	83.753	5
11.33	90.372	16.9712	7.58975	111.445	69.2995	5		84.19	13.722	6.13667	101.228	67.1519	5
11.42	86.84	13.71	6.13131	103.863	69.8167	5		93.388	10.9832	4.91182	107.025	79.7506	5
11.5	92.864	11.3212	5.063	106.921	78.8069	5		94.382	14.6097	6.53367	112.522	76.2416	5
11.58	92.998	14.9367	6.67988	111.544	74.4517	5		105.896	19.2312	8.60045	129.775	82.0173	5
11.67	95.358	10.5734	4.72855	108.487	82.2294	5		97.114	17.0064	7.60549	118.23	75.9978	5
11.75	93.854	10.6345	4.7559	107.059	80.6495	5		90.606	18.6928	8.35966	113.816	67.3959	5
11.83	91.81	10.4487	4.67279	104.784	78.8363	5		90.988	18.0194	8.05851	113.362	68.614	5
11.92	92.164	5.36424	2.39896	98.8246	85.5034	5		90.318	11.3885	5.09309	104.459	76.1773	5
12	88.46	4.72522	2.11318	94.3271	82.5929	5		97.19	5.34892	2.39211	103.832	90.5484	5
12.08	93.74	6.25839	2.79884	101.511	85.9692	5		95.872	11.2877	5.048	109.888	81.8565	5
12.17	93.798	10.6161	4.74764	106.98	80.6164	5		103.13	12.5659	5.61966	118.733	87.5273	5
12.25	91.324	9.30034	4.15924	102.872	79.7761	5		100.506	10.2614	4.58903	113.247	87.7648	5
12.33	91.01	9.1864	4.10828	102.416	79.6036	5		88.938	13.7434	6.14622	106.003	71.8734	5
12.42	93.664	9.12799	4.08216	104.998	82.3301	5		87.806	13.9815	6.25272	105.166	70.4457	5
12.5	89.376	4.26586	1.90775	94.6728	84.0792	5		84.71	12.9101	5.77358	100.74	68.68	5
12.58	85.142	14.4298	6.45318	103.059	67.2251	5		78.294	21.0467	9.41239	104.427	52.161	5
12.67	87.744	9.61874	4.30163	99.6872	75.8008	5		72.65	16.8929	7.55475	93.6253	51.6747	5
12.75	93.072	18.7756	8.39672	116.385	69.759	5		70.852	17.3898	7.77696	92.4443	49.2597	5
12.83	90.616	22.2082	9.93181	118.191	63.0409	5		73.116	12.5452	5.61036	88.6929	57.5391	5
12.92	85.588	11.6857	5.22601	100.098	71.0783	5		77.388	18.9494	8.47444	100.917	53.8592	5
13	77.902	5.36773	2.40052	84.5669	71.2371	5		77.064	11.0818	4.95593	90.8239	63.3041	5
13.08	78.428	11.8926	5.31855	93.1947	63.6613	5		80.768	13.7631	6.15503	97.8571	63.6789	5
13.17	79.8	10.7731	4.81787	93.1765	66.4235	5		84.186	13.1909	5.89916	100.565	67.8073	5
13.25	82.944	12.5641	5.61884	98.5444	67.3436	5		79.33	12.7769	5.714	95.1946	63.4654	5
13.33	80.976	13.5208	6.04667	97.7643	64.1877	5		80.75	18.7737	8.39586	104.061	57.4394	5
13.42	85.028	10.456	4.67605	98.0108	72.0452	5		77.062	12.357	5.52623	92.4053	61.7187	5
13.5	85.434	11.5348	5.15851	99.7563	71.1117	5		76.18	6.75385	3.02041	84.566	67.794	5
13.58	77.732	14.5074	6.48789	95.7453	59.7187	5		75.33	8.49225	3.79785	85.8745	64.7855	5
13.67	70.776	14.562	6.51231	88.8571	52.6949	5		74.414	10.0649	4.50114	86.9112	61.9168	5
13.75	72.81	13.6604	6.10911	89.7716	55.8484	5		81.984	14.6611	6.55665	100.188	63.7798	5
13.83	75.272	15.9591	7.13712	95.0878	55.4562	5		72.442	13.1612	5.88589	88.7838	56.1002	5
13.92	79.97	13.9527	6.23982	97.2945	62.6455	5		77.434	18.9976	8.49597	101.023	53.8454	5
14	76.006	16.6634	7.4521	96.6963	55.3157	5		78.612	22.5869	10.1012	106.657	50.5666	5
14.08	72.768	14.1741	6.33885	90.3675	55.1685	5		84.744	17.4283	7.79415	106.384	63.104	5
14.17	73.33	12.2611	5.48333	88.5542	58.1058	5		79.182	21.3526	9.54917	105.695	52.6692	5
14.25	79.29	23.1318	10.3449	108.012	50.5681	5		81.354	14.8327	6.6334	99.7713	62.9367	5
14.33	72.004	16.1895	7.24017	92.1059	51.9021	5		82.566	19.7114	8.81519	107.041	58.0911	5
14.42	67.068	12.3356	5.51666	82.3847	51.7513	5		79.514	21.1129	9.44198	105.729	53.2988	5
14.5	70.35	10.8984	4.87389	83.8821	56.8179	5		83.074	14.2566	6.37573	100.776	65.3721	5
14.58	73.676	15.9087	7.1146	93.4293	53.9227	5		81.476	18.3142	8.19037	104.216	58.7359	5
14.67	69.364	12.961	5.79633	85.4572	53.2708	5		73.468	8.56702	3.83129	84.1054	62.8306	5
14.75	73.448	13.4487	6.01442	90.1467	56.7493	5		76.458	10.5706	4.72733	89.5832	63.3328	5
14.83	77.054	16.4132	7.3402	97.4337	56.6743	5		75.51	11.4342	5.11355	89.7075	61.3125	5
14.92	74.652	13.1273	5.87073	90.9518	58.3522	5		71.674	6.90802	3.08936	80.2514	63.0966	5
15	75.252	12.7028	5.68085	91.0246	59.4794	5		69.056	5.41705	2.42258	75.7822	62.3298	5
15.08	71.134	14.1589	6.33203	88.7145	53.5535	5		69.758	5.05321	2.25987	76.0324	63.4836	5
15.17	74.136	15.4332	6.90193	93.2988	54.9732	5		68.528	8.26914	3.69807	78.7955	58.2605	5
15.25	78.382	18.9383	8.46947	101.897	54.867	5		75.886	10.2	4.56159	88.551	63.221	5
15.33	76.916	15.389	6.88216	96.0239	57.8081	5		67.738	5.55112	2.48254	74.6306	60.8454	5
15.42	72.444	14.2987	6.39459	90.1982	54.6898	5		70.318	13.3165	5.95534	86.8527	53.7833	5
15.5	67.504	9.78119	4.37428	79.6489	55.3591	5		73.24	10.8147	4.83649	86.6682	59.8118	5
15.58	73.986	18.3061	8.18675	96.7161	51.2559	5		73.394	13.1671	5.88849	89.7431	57.0449	5
15.67	72.214	14.5542	6.50881	90.2854	54.1426	5		73.304	8.5038	3.80302	83.8629	62.7451	5
15.75	76.784	18.2598	8.16605	99.4566	54.1114	5		69.536	5.79229	2.59039	76.7281	62.3439	5
15.83	69.98	19.3932	8.67292	94.0599	45.9001	5		69.542	7.93387	3.54813	79.3932	59.6908	5
15.92	82.256	22.5422	10.0812	110.246	54.2661	5		72.826	10.7305	4.79882	86.1497	59.5023	5
16	80.128	14.0501	6.28339	97.5735	62.6825	5		84.264	14.7573	6.59966	102.588	65.9404	5
16.08	77.378	12.7216	5.68929	93.174	61.582	5		78.318	10.3296	4.61953	91.1439	65.4921	5
16.17	80.564	14.4466	6.4607	98.5018	62.6262	5		86.91	17.8706	7.99198	109.099	64.7207	5
16.25	77.096	14.9068	6.66651	95.6052	58.5868	5		87.576	17.437	7.79804	109.227	65.9252	5
16.33	71.434	18.6188	8.3266	94.5523	48.3157	5		83.344	8.92983	3.99354	94.4318	72.2562	5
16.42	74.656	12.4212	5.55495	90.079	59.233	5		79.854	9.38096	4.19529	91.502	68.206	5
16.5	67.728	12.0011	5.36706	82.6294	52.8266	5		75.07	13.8236	6.1821	92.2343	57.9057	5
16.58	69.3	12.1307	5.42503	84.3623	54.2377	5		76.86	16.3639	7.31815	97.1784	56.5416	5
16.67	74.854	24.4396	10.9297	105.2	44.5082	5		73.328	15.5876	6.97097	92.6825	53.9735	5
16.75	80.604	14.5214	6.49416	98.6347	62.5733	5		70.432	19.1818	8.57838	94.2494	46.6146	5
16.83	81.82	17.8941	8.00247	104.038	59.6016	5		72.168	17.3593	7.76334	93.7225	50.6135	5
16.92	81.804	9.21249	4.11995	93.2428	70.3652	5		69.356	16.1032	7.20158	89.3508	49.3612	5
17	77.568	13.983	6.25339	94.9302	60.2058	5		73.212	11.3055	5.05599	87.2497	59.1743	5
17.08	76.856	13.6708	6.11376	93.8305	59.8815	5		67.656	10.3274	4.61854	80.4791	54.8329	5
17.17	74.63	13.8633	6.19986	91.8436	57.4164	5		64.446	8.75097	3.91355	75.3118	53.5802	5
17.25	76.302	20.9271	9.3589	102.286	50.3175	5		71.48	7.80073	3.48859	81.1659	61.7941	5
17.33	76.678	14.9194	6.67217	95.2029	58.1531	5		76.862	11.4507	5.12093	91.08	62.644	5
17.42	78.042	24.1161	10.785	107.986	48.098	5		74.09	13.8203	6.18062	91.2501	56.9299	5
17.5	73.278	13.3946	5.99025	89.9096	56.6464	5		78.164	14.9973	6.70701	96.7857	59.5423	5
17.58	75.968	17.678	7.90583	97.9181	54.0179	5		73.614	14.1806	6.34177	91.2216	56.0064	5
17.67	72.116	17.1892	7.68726	93.4592	50.7728	5		81.618	19.3772	8.66573	105.678	57.5581	5
17.75	74.82	21.5862	9.65364	101.623	48.0172	5		74.498	23.1782	10.3656	103.278	45.7185	5
17.83	66.546	14.3906	6.43569	84.4143	48.6777	5		76.296	21.0961	9.43446	102.49	50.1017	5
17.92	64.736	10.5809	4.7319	77.8739	51.5981	5		77.246	22.9966	10.2844	105.8	48.6919	5
18	69.712	16.608	7.42734	90.3336	49.0904	5		83.942	12.8608	5.75151	99.9107	67.9733	5
18.08	71.762	18.2572	8.16489	94.4314	49.0926	5		78.564	16.4909	7.37493	99.0401	58.0879	5
18.17	72.936	17.6341	7.88619	94.8316	51.0404	5		75.986	22.1337	9.8985	103.469	48.5034	5
18.25	75.318	15.0258	6.71973	93.975	56.661	5		76.26	14.1824	6.34258	93.8698	58.6502	5
18.33	74.742	12.7935	5.72143	90.6272	58.8568	5		78.798	21.1722	9.46849	105.087	52.5093	5
18.42	68.934	16.1096	7.20444	88.9367	48.9313	5		71.788	18.8232	8.41801	95.1602	48.4158	5
18.5	73.114	10.4214	4.66059	86.0539	60.1741	5		66.428	14.6987	6.57347	84.6789	48.1771	5
18.58	65.532	10.8663	4.85954	79.0242	52.0398	5		68.956	18.8091	8.41167	92.3105	45.6015	5
18.67	69.034	7.11475	3.18181	77.8681	60.1999	5		75.534	14.5738	6.51759	93.6297	57.4383	5
18.75	72.854	9.4476	4.22509	84.5847	61.1233	5		72.854	12.6268	5.64688	88.5322	57.1758	5
18.83	75.222	21.2678	9.51124	101.629	48.8146	5		79.536	12.4425	5.56445	94.9854	64.0866	5
18.92	81.828	22.3063	9.97566	109.525	54.1311	5		76.772	14.7842	6.61171	95.129	58.415	5
19	75.594	19.7946	8.85239	100.172	51.0158	5		75.902	20.1292	9.00204	100.896	50.9083	5
19.08	77.694	33.3087	14.8961	119.052	36.3358	5		68.066	10.7839	4.82272	81.456	54.676	5
19.17	71.12	18.4663	8.25837	94.0489	48.1911	5		74.604	11.1479	4.9855	88.446	60.762	5
19.25	63.714	10.8086	4.83377	77.1347	50.2933	5		68.656	8.16175	3.65005	78.7902	58.5218	5
19.33	61.198	14.5989	6.52883	79.3249	43.0711	5		68.474	8.84697	3.95648	79.459	57.489	5
19.42	56.538	4.38845	1.96257	61.987	51.089	5		74.46	16.7589	7.49481	95.2689	53.6511	5
19.5	61.684	6.21444	2.77918	69.4002	53.9678	5		82.93	23.8147	10.6502	112.5	53.3602	5
19.58	62.782	12.3337	5.5158	78.0963	47.4677	5		80.174	22.9692	10.2722	108.694	51.6539	5
19.67	59.83	12.2362	5.4722	75.0232	44.6368	5		81.704	25.7112	11.4984	113.629	49.7794	5
19.75	64.566	22.7117	10.157	92.7663	36.3657	5		70.596	14.9825	6.70038	89.1992	51.9928	5
19.83	63.26	24.1246	10.7889	93.2147	33.3053	5		77.678	17.1798	7.68306	99.0096	56.3464	5
19.92	64.522	20.9224	9.35678	90.5006	38.5434	5		72.61	17.181	7.68356	93.943	51.277	5
20	67.748	17.4919	7.82264	89.4671	46.0289	5		71.202	18.0923	8.09113	93.6666	48.7374	5
20.08	76.322	24.7655	11.0755	107.072	45.5716	5		71.486	15.1509	6.7757	90.2983	52.6737	5
20.17	69.142	24.1508	10.8006	99.1292	39.1548	5		65.912	12.8338	5.73944	81.8472	49.9768	5
20.25	72.336	19.8967	8.89809	97.0411	47.6309	5		67.97	16.9549	7.58246	89.0223	46.9177	5
20.33	69.658	18.3626	8.21201	92.4582	46.8578	5		69.18	14.4215	6.4495	87.0867	51.2733	5
20.42	85.858	23.6007	10.5546	115.162	56.5538	5		69.346	13.3813	5.98428	85.961	52.731	5
20.5	91.666	33.4469	14.9579	133.196	50.1361	5		68.86	11.898	5.32093	83.6333	54.0867	5
20.58	75.09	17.3279	7.74927	96.6054	53.5746	5		70.134	22.4036	10.0192	97.9518	42.3162	5
20.67	75.42	12.4369	5.56196	90.8625	59.9775	5		79.694	24.686	11.0399	110.346	49.0422	5
20.75	73.662	16.113	7.20597	93.669	53.655	5		86.062	24.2335	10.8376	116.152	55.9721	5
20.83	73.686	16.1021	7.20107	93.6794	53.6926	5		83.428	26.0681	11.658	115.796	51.0602	5
20.92	69.51	12.9329	5.78379	85.5684	53.4516	5		81.196	23.8594	10.6703	110.821	51.5706	5
21	73.878	7.20262	3.22111	82.8212	64.9348	5		72.598	15.1555	6.77775	91.416	53.78	5
21.08	69.564	12.286	5.49448	84.8191	54.3089	5		76.044	14.64	6.54719	94.2219	57.8661	5
21.17	68.138	9.68912	4.33311	80.1686	56.1074	5		72.768	15.5662	6.96143	92.096	53.44	5
21.25	70.372	17.4035	7.78308	91.9813	48.7627	5		68.606	23.4413	10.4833	97.7122	39.4998	5
21.33	70.038	14.4212	6.44935	87.9443	52.1317	5		70.382	18.5459	8.294	93.4098	47.3542	5
21.42	63.874	8.09174	3.61874	73.9212	53.8268	5		72.248	14.5723	6.51694	90.3419	54.1541	5
21.5	68.336	17.3273	7.74901	89.8507	46.8213	5		76.12	15.3668	6.87223	95.2004	57.0396	5
21.58	68.888	16.9339	7.57306	89.9142	47.8618	5		80.526	24.9199	11.1445	111.468	49.5838	5
21.67	69.374	13.419	6.00116	86.0359	52.7121	5		85.828	28.612	12.7957	121.355	50.3015	5
21.75	74.592	12.7514	5.70259	90.4249	58.7591	5		75.394	17.973	8.03777	97.7104	53.0776	5
21.83	70.28	18.0971	8.09327	92.7505	47.8095	5		71.204	17.5898	7.86639	93.0446	49.3634	5
21.92	64.584	16.7928	7.50996	85.435	43.733	5		68.038	15.5983	6.97575	87.4058	48.6702	5
22	64.454	14.6642	6.55803	82.662	46.246	5		63.592	6.20864	2.77659	71.301	55.883	5
22.08	66.734	21.01	9.39594	92.8213	40.6467	5		74.224	21.2754	9.51467	100.641	47.807	5
22.17	64.422	15.5051	6.93411	83.6742	45.1698	5		82.268	25.9556	11.6077	114.496	50.0398	5
22.25	69.274	22.8753	10.2301	97.6774	40.8706	5		86.846	34.0355	15.2211	129.107	44.5854	5
22.33	63.93	18.6433	8.33755	87.0787	40.7813	5		79.258	29.4572	13.1737	115.834	42.682	5
22.42	64.276	6.40705	2.86532	72.2314	56.3206	5		81.886	28.2717	12.6435	116.99	46.782	5
22.5	70.74	18.2574	8.16498	93.4096	48.0704	5		86.302	23.8072	10.6469	115.863	56.7415	5
22.58	67.948	13.1997	5.9031	84.3376	51.5584	5		82.02	14.2783	6.38545	99.7489	64.2911	5
22.67	69.09	18.8378	8.42451	92.4802	45.6998	5		75.276	13.1572	5.88408	91.6128	58.9392	5
22.75	70.716	18.0785	8.08496	93.1634	48.2686	5		75.694	18.8775	8.4423	99.1336	52.2544	5
22.83	77.308	16.5653	7.40825	97.8766	56.7394	5		73.446	12.9608	5.79623	89.5389	57.3531	5
22.92	85.776	8.66647	3.87576	96.5368	75.0152	5		82.312	14.2603	6.37741	100.019	64.6055	5
23	83.288	1.76716	0.7903	85.4822	81.0938	5		73.91	13.609	6.08611	90.8078	57.0122	5
23.08	82.024	15.8336	7.081	101.684	62.364	5		76.102	17.695	7.91345	98.0733	54.1307	5
23.17	76.296	12.0963	5.40965	91.3156	61.2764	5		82.572	28.6211	12.7997	118.11	47.0343	5
23.25	80.372	23.0843	10.3236	109.035	51.709	5		90.046	17.0878	7.64191	111.263	68.8287	5
23.33	74.748	13.0453	5.83405	90.9459	58.5501	5		82.684	11.2935	5.05059	96.7067	68.6613	5
23.42	78.97	26.6661	11.9254	112.08	45.8597	5		93.354	27.5871	12.3373	127.608	59.1001	5
23.5	73.208	20.469	9.15401	98.6236	47.7924	5		94.018	15.2774	6.83228	112.987	75.0485	5
23.58	74.062	17.803	7.96173	96.1673	51.9567	5		82.208	23.9239	10.6991	111.913	52.5025	5
23.67	72.66	14.1131	6.31158	90.1838	55.1362	5		79.462	18.0814	8.08625	101.913	57.011	5
23.75	79.666	22.3796	10.0085	107.454	51.8781	5		78.13	22.2822	9.96492	105.797	50.4629	5
23.83	75.706	26.2766	11.7512	108.333	43.0793	5		83.258	28.0778	12.5568	118.121	48.3948	5
23.92	79.922	16.4437	7.35386	100.34	59.5044	5		80.264	26.4727	11.8389	113.134	47.3938	5
24	80.648	17.9915	8.04606	102.987	58.3085	5		81.576	26.3229	11.772	114.26	48.8918	5
24.08	84.866	28.3215	12.6658	120.032	49.7002	5		80.124	18.9648	8.48133	103.672	56.576	5
24.17	83.426	27.5743	12.3316	117.664	49.1879	5		77.188	26.2265	11.7288	109.752	44.6235	5
24.25	78.704	22.5937	10.1042	106.758	50.6502	5		79.436	20.8276	9.31439	105.297	53.5751	5
24.33	80.308	16.6765	7.45797	101.015	59.6014	5		78.886	17.8236	7.97094	101.017	56.7551	5
24.42	78.906	23.3056	10.4226	107.844	49.9683	5		75.656	19.9288	8.91245	100.401	50.9111	5
24.5	82.358	22.697	10.1504	110.54	54.1759	5		80.056	26.1063	11.6751	112.471	47.6408	5
24.58	79.914	17.328	7.74931	101.43	58.3985	5		81.674	9.18423	4.10731	93.0777	70.2703	5
24.67	82.008	18.5697	8.30463	105.065	58.9506	5		91.59	21.0139	9.3977	117.682	65.4978	5
24.75	83.97	15.8067	7.06896	103.597	64.3434	5		84.75	13.481	6.0289	101.489	68.0111	5
24.83	78.818	8.79187	3.93184	89.7345	67.9015	5		87.45	24.8629	11.119	118.321	56.5786	5
24.92	79.348	6.69575	2.99443	87.6619	71.0341	5		87.652	24.7715	11.0781	118.41	56.8942	5
25	82.936	11.8201	5.2861	97.6126	68.2594	5		87.91	17.7678	7.94601	109.972	65.8483	5
25.08	89.006	13.3822	5.98469	105.622	72.3898	5		90.31	21.299	9.52522	116.756	63.8637	5
25.17	86.614	14.1178	6.31368	104.144	69.0844	5		81.386	17.5375	7.84302	103.162	59.6103	5
25.25	88.576	19.1475	8.56303	112.351	64.8012	5		94.374	8.99778	4.02393	105.546	83.2018	5
25.33	90.676	15.1674	6.78306	109.509	71.8432	5		101.896	8.44308	3.77586	112.379	91.4125	5
25.42	93.024	13.2349	5.91883	109.457	76.5907	5		100.352	18.6113	8.32322	123.461	77.243	5
25.5	94.95	18.8215	8.41723	118.32	71.58	5		110.79	19.5696	8.75179	135.089	86.4911	5
25.58	95.38	14.5016	6.48532	113.386	77.3739	5		105.648	15.1029	6.75422	124.401	86.8953	5
25.67	91.502	11.9505	5.34441	106.34	76.6635	5		95.828	12.9065	5.77194	111.853	79.8025	5
25.75	94.942	20.0128	8.94999	119.791	70.0929	5		92.798	15.7776	7.05595	112.388	73.2075	5
25.83	93.888	14.9787	6.69867	112.487	75.2895	5		95.886	11.0662	4.94894	109.626	82.1455	5
25.92	90.99	16.6309	7.43757	111.64	70.34	5		100.292	18.5224	8.28346	123.291	77.2934	5
26	91.314	11.7314	5.24646	105.881	76.7475	5		99.816	20.4284	9.13584	125.181	74.4508	5
26.08	91.672	14.3302	6.40866	109.465	73.8787	5		94.77	15.5947	6.97416	114.133	75.4066	5
26.17	89.97	14.2871	6.38939	107.71	72.2302	5		98.63	12.8445	5.74424	114.579	82.6814	5
26.25	94.738	14.0652	6.29013	112.202	77.2738	5		102.152	12.6784	5.66997	117.894	86.4096	5
26.33	97.104	14.8484	6.6404	115.541	78.6673	5		99.078	13.4513	6.0156	115.78	82.376	5
26.42	93.974	16.8831	7.55036	114.937	73.0109	5		94.996	20.0054	8.9467	119.836	70.156	5
26.5	93.046	14.5037	6.48626	111.055	75.0373	5		91.788	14.62	6.53827	109.941	73.6349	5
26.58	89.3	17.6782	7.90594	111.25	67.3496	5		89.338	9.49344	4.24559	101.126	77.5503	5
26.67	84.78	19.437	8.6925	108.914	60.6458	5		92.896	13.2433	5.9226	109.34	76.4522	5
26.75	87.906	23.3748	10.4535	116.93	58.8823	5		96.456	17.1361	7.66351	117.733	75.1787	5
26.83	89.006	14.0051	6.26327	106.396	71.6164	5		94.124	15.3445	6.86225	113.177	75.0713	5
26.92	87.478	21.2525	9.50441	113.866	61.0895	5		96.846	17.6297	7.88423	118.736	74.9559	5
27	86.21	16.4521	7.35758	106.638	65.7821	5		95.012	28.4181	12.709	130.298	59.7262	5
27.08	89.984	15.6847	7.01439	109.459	70.5089	5		87.552	18.7755	8.39664	110.865	64.2392	5
27.17	86.778	13.0367	5.8302	102.965	70.5908	5		92.922	19.2923	8.62777	116.877	68.9675	5
27.25	94.692	20.6418	9.23129	120.322	69.0618	5		96.068	20.5254	9.17924	121.554	70.5823	5
27.33	88.674	17.3168	7.7443	110.176	67.1724	5		90.37	17.0084	7.60639	111.489	69.2513	5
27.42	79.762	8.7772	3.92528	90.6603	68.8637	5		88.3	15.2337	6.8127	107.215	69.3849	5
27.5	84.788	15.9568	7.1361	104.601	64.975	5		86.432	27.2899	12.2044	120.317	52.5471	5
27.58	89.658	23.2442	10.3951	118.519	60.7965	5		93.254	16.9621	7.58568	114.315	72.1928	5
27.67	86.938	23.0296	10.2991	115.533	58.343	5		99.896	9.20596	4.11703	111.327	88.4653	5
27.75	83.244	18.3955	8.22671	106.085	60.403	5		93.476	19.3229	8.64147	117.469	69.4834	5
27.83	84.82	14.7426	6.59308	103.125	66.5147	5		90.392	20.4509	9.1459	115.785	64.9989	5
27.92	90.896	17.7758	7.94957	112.968	68.8245	5		96.952	16.3216	7.29926	117.218	76.686	5
28	88.832	17.8966	8.00359	111.054	66.6105	5		97.836	5.38637	2.40886	104.524	91.1479	5
28.08	94.364	18.1952	8.13712	116.956	71.7717	5		103.678	14.34	6.41306	121.484	85.8725	5
28.17	92.988	13.6595	6.10872	109.949	76.0275	5		105.234	15.1633	6.78124	124.062	86.4063	5
28.25	91.156	12.1643	5.44003	106.26	76.0521	5		104.152	12.004	5.36834	119.057	89.2471	5
28.33	95.226	14.8498	6.64102	113.664	76.7876	5		102.382	10.6641	4.76914	115.623	89.1407	5
28.42	91.362	11.2763	5.0429	105.363	77.3607	5		104.028	16.8413	7.53164	124.939	83.1168	5
28.5	97.566	9.28888	4.15411	109.1	86.0323	5		100.616	18.7578	8.38877	123.907	77.3251	5
28.58	97.916	14.8903	6.65916	116.405	79.4272	5		97.602	13.615	6.08882	114.507	80.6967	5
28.67	89.18	11.4606	5.12535	103.41	74.9498	5		99.168	12.5562	5.61529	114.759	83.5775	5
28.75	89.792	16.0568	7.18081	109.729	69.8549	5		98.486	16.5145	7.38551	118.991	77.9805	5
28.83	89.708	12.2903	5.49639	104.968	74.4476	5		99.402	19.5351	8.73637	123.658	75.146	5
28.92	90.714	13.3306	5.96161	107.266	74.1619	5		90.956	13.8651	6.20067	108.172	73.7402	5
29	89.892	13.4602	6.01958	106.605	73.179	5		88.794	12.9071	5.77223	104.82	72.7677	5
29.08	91.138	13.7447	6.14682	108.204	74.0717	5		96.814	16.0652	7.18457	116.762	76.8664	5
29.17	89.69	13.3786	5.98311	106.302	73.0782	5		96.474	27.7991	12.4321	130.991	61.9569	5
29.25	89.506	12.8572	5.74991	105.47	73.5417	5		90.3	15.3074	6.84567	109.307	71.2934	5
29.33	91.5	15.9753	7.14436	111.336	71.6641	5		91.114	16.5639	7.4076	111.681	70.5472	5
29.42	91.526	20.7475	9.27857	117.287	65.7646	5		84.558	8.36145	3.73935	94.9401	74.1759	5
29.5	88.454	15.7415	7.0398	108	68.9084	5		78.932	15.0932	6.74987	97.6726	60.1914	5
29.58	92.786	12.6307	5.64863	108.469	77.1029	5		87.61	20.1668	9.01888	112.65	62.5696	5
29.67	91.15	15.8654	7.09524	110.85	71.4505	5		88.636	23.2685	10.406	117.528	59.7443	5
29.75	86.144	9.91315	4.4333	98.4528	73.8352	5		94.67	17.6667	7.90078	116.606	72.7339	5
29.83	88.044	15.4527	6.91064	107.231	68.857	5		92.038	28.0702	12.5534	126.892	57.1843	5
29.92	88.402	12.3387	5.51804	103.723	73.0815	5		101.36	37.969	16.9802	148.505	54.2153	5
30	97.256	15.3402	6.86034	116.303	78.2086	5		101.922	25.1824	11.2619	133.19	70.6539	5
30.08	85.63	10.6367	4.75689	98.8372	72.4228	5		97.162	18.1848	8.13251	119.741	74.5825	5
30.17	91.914	12.649	5.65678	107.62	76.2083	5		95.264	11.6258	5.19921	109.699	80.8287	5
30.25	97.394	7.74632	3.46426	107.012	87.7757	5		94.836	12.9046	5.77111	110.859	78.8128	5
30.33	90.48	9.36134	4.18652	102.104	78.8564	5		99.464	12.1398	5.42906	114.537	84.3905	5
30.42	90.718	10.7714	4.81711	104.092	77.3436	5		107.916	13.7028	6.12808	124.93	90.9017	5
30.5	92.852	14.5848	6.52253	110.961	74.7426	5		99.472	17.5155	7.83315	121.22	77.7237	5
30.58	93.874	21.4365	9.58669	120.491	67.2571	5		95.742	16.0615	7.18292	115.685	75.799	5
30.67	86.662	20.3881	9.11785	111.977	61.3468	5		96.292	16.8822	7.54993	117.254	75.33	5
30.75	88.586	18.5758	8.30737	111.651	65.5211	5		99.948	13.6036	6.08372	116.839	83.0569	5
30.83	88.366	18.2016	8.14002	110.966	65.7657	5		96.074	22.503	10.0637	124.015	68.1328	5
30.92	90.13	14.5346	6.50008	108.177	72.0829	5		99.836	26.1986	11.7164	132.366	67.3061	5
31	91.386	17.5885	7.86582	113.225	69.547	5		93.72	27.3392	12.2265	127.666	59.7739	5
31.08	93.45	16.4539	7.35843	113.88	73.0197	5		92.886	23.1883	10.3701	121.678	64.0939	5
31.17	89.668	15.8533	7.08981	109.352	69.9835	5		95.502	29.022	12.979	131.538	59.4665	5
31.25	83.616	17.501	7.82668	105.346	61.8857	5		93.668	23.8975	10.6873	123.341	63.9953	5
31.33	84.82	17.5416	7.84485	106.601	63.0392	5		88.028	25.2605	11.2969	119.393	56.6629	5
31.42	86.358	13.5898	6.07753	103.232	69.4841	5		84.73	18.6715	8.35013	107.914	61.5463	5
31.5	90.188	17.5788	7.86148	112.015	68.361	5		79.564	24.554	10.9809	110.052	49.0762	5
31.58	90.624	9.2398	4.13216	102.097	79.1513	5		91.354	25.9533	11.6067	123.579	59.1288	5
31.67	89.586	13.8107	6.17631	106.734	72.4378	5		88.552	25.9656	11.6122	120.793	56.3114	5
31.75	91.832	15.2789	6.83295	110.803	72.8607	5		89.782	22.3837	10.0103	117.575	61.989	5
31.83	89.84	16.9427	7.577	110.877	68.8029	5		82.272	9.87166	4.41474	94.5293	70.0147	5
31.92	85.026	9.0619	4.05261	96.2778	73.7742	5		80.526	14.8132	6.62466	98.919	62.133	5
32	82.982	8.07235	3.61007	93.0051	72.9589	5		97.038	22.2305	9.94177	124.641	69.4352	5
32.08	78.986	3.61791	1.61798	83.4782	74.4938	5		93.524	27.6689	12.3739	127.879	59.1685	5
32.17	85.634	11.3406	5.07168	99.7152	71.5528	5		102.256	25.7324	11.5079	134.207	70.305	5
32.25	84.892	15.4323	6.90152	104.054	65.7303	5		101.182	27.2045	12.1662	134.961	67.4032	5
32.33	89.87	14.0276	6.27331	107.288	72.4525	5		100.39	16.9051	7.56018	121.38	79.3996	5
32.42	91.436	20.7747	9.29075	117.231	65.6407	5		94.416	15.1684	6.7835	113.25	75.582	5
32.5	87.392	19.8804	8.89079	112.077	62.7072	5		88.54	17.3286	7.7496	110.056	67.0236	5
32.58	87.924	15.6464	6.99729	107.352	68.4964	5		92.748	16.0238	7.16607	112.644	72.8518	5
32.67	91.546	14.4432	6.45919	109.48	73.6124	5		95.152	21.9146	9.80051	122.363	67.9414	5
32.75	93.728	21.6459	9.68036	120.605	66.851	5		92.284	13.2097	5.90756	108.686	75.882	5
32.83	88.154	13.739	6.14428	105.213	71.0947	5		90.434	10.8729	4.86252	103.935	76.9335	5
32.92	86.186	17.3644	7.7656	107.747	64.6252	5		89.148	9.65318	4.31703	101.134	77.162	5
33	86.446	9.68237	4.33009	98.4682	74.4238	5		96.154	22.3068	9.97592	123.852	68.4564	5
33.08	89.704	7.03673	3.14692	98.4413	80.9667	5		89.946	12.1224	5.42132	104.998	74.894	5
33.17	95.944	15.1696	6.78407	114.78	77.1084	5		85.996	9.3351	4.17478	97.5871	74.4049	5
33.25	90.166	12.628	5.6474	105.846	74.4863	5		78.432	10.746	4.80574	91.7749	65.0891	5
33.33	89.338	16.7196	7.47723	110.098	68.5779	5		94.53	11.9029	5.32312	109.309	79.7506	5
33.42	84.126	7.89596	3.53118	93.9301	74.3219	5		91.172	14.9525	6.68695	109.738	72.606	5
33.5	84.168	9.19559	4.11239	95.5858	72.7502	5		85.348	13.8995	6.21606	102.607	68.0895	5
33.58	91.138	13.6079	6.08564	108.034	74.2415	5		98.842	14.804	6.62054	117.224	80.4604	5
33.67	92.196	14.5825	6.52148	110.303	74.0895	5		95.754	16.5344	7.3944	116.284	75.2238	5
33.75	89.884	12.2904	5.49642	105.145	74.6235	5		95.67	16.7981	7.51235	116.528	74.8124	5
33.83	86.148	18.8061	8.41033	109.499	62.7972	5		100.562	18.5532	8.29726	123.599	77.5251	5
33.92	89.118	14.0493	6.28304	106.563	71.6735	5		97.742	22.9666	10.271	126.259	69.2252	5
34	93.398	14.2512	6.37333	111.093	75.7028	5		99.648	21.9537	9.81799	126.907	72.3889	5
34.08	86.49	12.7497	5.70185	102.321	70.6591	5		94.72	18.2491	8.16125	117.379	72.0607	5
34.17	90.968	14.133	6.32048	108.516	73.4195	5		97.168	17.6196	7.87973	119.046	75.2904	5
34.25	93.266	13.4015	5.99334	109.906	76.6258	5		95.372	19.4527	8.69952	119.526	71.2183	5
34.33	97.09	16.1971	7.24355	117.201	76.9787	5		88.288	8.51012	3.80584	98.8547	77.7213	5
34.42	90.17	12.6471	5.65596	105.873	74.4665	5		95.156	8.60734	3.84932	105.843	84.4686	5
34.5	90.456	12.5304	5.60376	106.015	74.8975	5		99.902	16.4464	7.35508	120.323	79.481	5
34.58	88.096	16.1915	7.24105	108.2	67.9916	5		95.95	13.6164	6.08942	112.857	79.043	5
34.67	92.258	16.6755	7.45751	112.963	71.5526	5		96.622	10.506	4.69842	109.667	83.5771	5
34.75	87.09	13.7392	6.14434	104.149	70.0306	5		99.34	13.1301	5.87196	115.643	83.0368	5
34.83	93.136	16.4403	7.3523	113.549	72.7227	5		99.192	17.9074	8.00845	121.427	76.957	5
34.92	85.504	11.6826	5.22462	100.01	70.9981	5		78.34	15.2468	6.81857	97.2714	59.4086	5
35	89.74	10.8912	4.87069	103.263	76.2168	5		86.08	8.11405	3.62871	96.1549	76.0051	5
35.08	94.138	24.4998	10.9566	124.558	63.7175	5		93.662	20.9507	9.36945	119.676	67.6482	5
35.17	91.846	17.5782	7.86119	113.672	70.0198	5		91.33	14.0934	6.30274	108.829	73.8308	5
35.25	88.994	11.585	5.18097	103.379	74.6093	5		96.428	12.2333	5.4709	111.618	81.2384	5
35.33	92.784	11.9583	5.34793	107.632	77.9358	5		91.152	10.1141	4.52315	103.71	78.5937	5
35.42	90.936	12.1454	5.4316	106.017	75.8555	5		97.274	13.6301	6.09558	114.198	80.3499	5
35.5	93.914	12.804	5.72613	109.812	78.0157	5		97.968	15.8394	7.08357	117.635	78.3008	5
35.58	93.58	8.16496	3.65148	103.718	83.4419	5		100.768	25.131	11.2389	131.972	69.5638	5
35.67	92.106	7.7739	3.47659	101.759	82.4534	5		97.47	12.7805	5.7156	113.339	81.601	5
35.75	88.56	9.02254	4.035	99.763	77.357	5		95.948	7.70804	3.44714	105.519	86.3772	5
35.83	91.488	8.17881	3.65768	101.643	81.3327	5		102.57	17.7568	7.9411	124.618	80.522	5
35.92	91.114	11.6267	5.19964	105.551	76.6775	5		97.752	12.7025	5.68072	113.524	81.9798	5
36	90.708	15.5716	6.96384	110.043	71.3733	5		92.906	13.3921	5.98914	109.535	76.2775	5
36.08	97.196	12.8637	5.75282	113.168	81.2236	5		97.154	18.4108	8.23354	120.014	74.294	5
36.17	86.696	10.2612	4.58896	99.437	73.955	5		90.96	18.8397	8.42537	114.353	67.5674	5
36.25	89.348	15.3909	6.88304	108.458	70.2376	5		99.368	19.6335	8.78036	123.746	74.9898	5
36.33	98.014	15.3461	6.86298	117.069	78.9593	5		91.656	17.919	8.01364	113.905	69.4066	5
36.42	91.12	10.0025	4.47327	103.54	78.7002	5		98.818	17.8838	7.99789	121.024	76.6123	5
36.5	84.63	11.1044	4.96604	98.4179	70.8421	5		99.368	11.2711	5.04058	113.363	85.3731	5
36.58	89.016	11.4754	5.13196	103.265	74.7674	5		93.294	14.7126	6.57966	111.562	75.0259	5
36.67	86.35	12.6729	5.6675	102.086	70.6145	5		96.878	17.3404	7.75487	118.409	75.347	5
36.75	91.462	5.18048	2.31678	97.8944	85.0296	5		95.956	18.7703	8.39432	119.262	72.6496	5
36.83	82.968	1.46934	0.65711	84.7924	81.1436	5		96.742	16.5639	7.40762	117.309	76.1751	5
36.92	78.958	8.33807	3.7289	89.3111	68.6049	5		88.312	13.2588	5.92952	104.775	71.849	5
37	79.256	10.7137	4.79129	92.5588	65.9532	5		89.812	17.7862	7.95422	111.896	67.7275	5
37.08	77.35	14.5508	6.50733	95.4172	59.2828	5		88.024	24.906	11.1383	118.949	57.0991	5
37.17	83.82	18.8201	8.41658	107.188	60.4518	5		87.48	14.2869	6.38931	105.22	69.7404	5
37.25	79.926	17.0497	7.62486	101.096	58.756	5		90.404	13.9113	6.2213	107.677	73.1309	5
37.33	81.896	10.4744	4.6843	94.9017	68.8903	5		87.6	17.8126	7.96602	109.717	65.4828	5
37.42	82.256	8.15445	3.64678	92.3811	72.1309	5		83.876	14.6544	6.55366	102.072	65.6801	5
37.5	75.628	8.05686	3.60314	85.6319	65.6241	5		85.34	20.3947	9.12077	110.663	60.0167	5
37.58	77.956	7.90007	3.53302	87.7652	68.1468	5		85.278	9.20721	4.11759	96.7103	73.8457	5
37.67	76.536	6.25612	2.79782	84.304	68.768	5		82.584	10.9262	4.88636	96.1507	69.0173	5
37.75	77.422	4.68923	2.09709	83.2444	71.5996	5		75.326	9.59413	4.29062	87.2387	63.4133	5
37.83	73.55	8.84087	3.95376	84.5274	62.5726	5		78.296	14.5715	6.51655	96.3889	60.2031	5
37.92	74.202	11.7836	5.26981	88.8333	59.5707	5		69.942	9.59854	4.2926	81.8602	58.0238	5
38	72.536	12.4362	5.56163	87.9776	57.0944	5		68.39	10.7914	4.82608	81.7893	54.9907	5
38.08	74.368	12.2382	5.47307	89.5637	59.1723	5		67.298	10.1643	4.54562	79.9187	54.6773	5
38.17	76.63	21.8879	9.78856	103.807	49.4526	5		73.022	13.2635	5.93162	89.4908	56.5532	5
38.25	77.06	11.1102	4.96861	90.8551	63.2649	5		85.444	12.2862	5.49454	100.699	70.1887	5
38.33	71.468	13.2954	5.94588	87.9764	54.9596	5		75.41	6.66222	2.97943	83.6822	67.1378	5
38.42	74.702	12.1936	5.45315	89.8424	59.5616	5		75.31	3.76024	1.68163	79.979	70.641	5
38.5	75.282	13.4893	6.03262	92.0312	58.5328	5		77.274	18.9729	8.48493	100.832	53.716	5
38.58	75.024	15.4825	6.92401	94.2481	55.7999	5		72.428	16.6754	7.45747	93.1333	51.7227	5
38.67	78.966	14.8021	6.6197	97.3452	60.5868	5		72.678	12.0541	5.39077	87.6452	57.7108	5
38.75	74.982	15.5595	6.9584	94.3016	55.6624	5		73.808	8.99714	4.02364	84.9794	62.6366	5
38.83	79.672	16.7461	7.48909	100.465	58.8789	5		79.038	13.6904	6.12252	96.0368	62.0392	5
38.92	69.19	15.1831	6.79009	88.0423	50.3377	5		78.98	10.6249	4.75159	92.1725	65.7875	5
39	71.672	14.598	6.52844	89.7979	53.5461	5		81.274	10.103	4.51819	93.8185	68.7295	5
39.08	75.926	12.5965	5.63332	91.5666	60.2854	5		77.786	11.4578	5.12409	92.0128	63.5592	5
39.17	81.062	16.4688	7.36505	101.511	60.6133	5		75.094	5.21061	2.33025	81.5638	68.6242	5
39.25	79.948	19.7691	8.841	104.495	55.4014	5		72.12	6.71301	3.00215	80.4553	63.7847	5
39.33	78.774	24.722	11.056	109.47	48.0776	5		74.384	16.94	7.57579	95.4178	53.3502	5
39.42	81.86	17.9507	8.02781	104.149	59.5712	5		80.616	13.6809	6.1183	97.6031	63.6289	5
39.5	76.612	18.6675	8.34834	99.7907	53.4333	5		80.886	17.3195	7.74553	102.391	59.381	5
39.58	82.728	19.5142	8.72702	106.958	58.4979	5		84.018	28.5497	12.7678	119.467	48.5689	5
39.67	72.81	14.7057	6.57659	91.0695	54.5505	5		82.668	19.7841	8.84772	107.233	58.1028	5
39.75	85.314	27.7083	12.3915	119.718	50.9096	5		81.728	11.2881	5.04821	95.7441	67.7119	5
39.83	73.366	14.0307	6.27472	90.7874	55.9446	5		82.964	6.8237	3.05165	91.4367	74.4913	5
39.92	65.778	11.727	5.24447	80.339	51.217	5		79.822	17.8244	7.97132	101.954	57.6901	5
40	69.29	15.259	6.82403	88.2365	50.3435	5		85.486	16.651	7.44654	106.161	64.8111	5
40.08	67.4	12.2059	5.45865	82.5556	52.2444	5		78.438	12.0883	5.40603	93.4476	63.4284	5
40.17	69.038	12.6869	5.67374	84.7908	53.2852	5		75.66	2.70705	1.21063	79.0212	72.2988	5
40.25	69.624	13.0241	5.82456	85.7956	53.4524	5		71.364	10.451	4.67384	84.3407	58.3873	5
40.33	67.702	16.9383	7.57502	88.7336	46.6704	5		71.434	14.405	6.44209	89.3201	53.5479	5
40.42	71.252	16.159	7.22654	91.3161	51.1879	5		71.59	10.0158	4.47919	84.0262	59.1538	5
40.5	77.838	16.86	7.54004	98.7725	56.9035	5		69.348	8.64083	3.8643	80.077	58.619	5
40.58	70.796	8.32134	3.72141	81.1283	60.4637	5		74.256	8.82258	3.94558	85.2107	63.3013	5
40.67	67.282	11.6911	5.22843	81.7984	52.7656	5		73.314	15.7261	7.03292	92.8405	53.7875	5
40.75	72.68	12.7307	5.69335	88.4873	56.8727	5		73.878	13.8313	6.18554	91.0518	56.7042	5
40.83	67.592	10.9391	4.8921	81.1747	54.0093	5		71.434	6.54957	2.92906	79.5664	63.3016	5
40.92	63.454	10.1142	4.52321	76.0125	50.8955	5		69.586	11.9618	5.34946	84.4385	54.7335	5
41	63.604	15.8136	7.07207	83.2392	43.9688	5		68.912	9.67525	4.3269	80.9254	56.8986	5
41.08	73.756	23.9464	10.7091	103.489	44.0227	5		68.892	7.39811	3.30854	78.078	59.706	5
41.17	71.864	20.6398	9.23041	97.4917	46.2363	5		75.848	15.5508	6.95452	95.1568	56.5392	5
41.25	70.824	21.6847	9.69768	97.7491	43.8989	5		73.21	16.9155	7.56485	94.2134	52.2066	5
41.33	71.018	25.0135	11.1864	102.076	39.9596	5		73.374	14.3426	6.4142	91.1827	55.5653	5
41.42	68.934	22.8255	10.2079	97.2756	40.5924	5		68.562	11.9585	5.34799	83.4104	53.7136	5
41.5	63.448	10.198	4.56067	76.1105	50.7855	5		74.746	16.1236	7.21071	94.7661	54.7259	5
41.58	67.178	12.9701	5.80041	83.2825	51.0735	5		73.922	19.3176	8.6391	97.908	49.936	5
41.67	64.276	15.7253	7.03258	83.8016	44.7504	5		76.868	20.3462	9.09908	102.131	51.6049	5
41.75	69.048	8.84759	3.95676	80.0337	58.0623	5		73.466	17.7112	7.92068	95.4573	51.4747	5
41.83	71.634	11.8787	5.31231	86.3833	56.8847	5		83.064	21.05	9.41383	109.201	56.927	5
41.92	77.118	21.802	9.75017	104.189	50.0472	5		81.662	13.0291	5.8268	97.8398	65.4842	5
42	76.506	22.6088	10.1109	104.578	48.4335	5		83.872	26.2341	11.7323	116.446	51.298	5
42.08	85.684	12.0854	5.40476	100.69	70.678	5		79.61	18.8643	8.43637	103.033	56.1869	5
42.17	81.694	16.6094	7.42795	102.317	61.0707	5		73.536	17.2582	7.71808	94.9648	52.1072	5
42.25	76.166	13.508	6.04096	92.9384	59.3936	5		70.68	17.9569	8.03057	92.9764	48.3836	5
42.33	73.434	16.5544	7.40337	93.989	52.879	5		70.956	11.3347	5.06902	85.0298	56.8822	5
42.42	68.232	13.867	6.20151	85.4502	51.0138	5		74.466	10.2782	4.59654	87.228	61.704	5
42.5	71.36	9.63905	4.31071	83.3285	59.3915	5		75.106	13.1146	5.86502	91.3899	58.8221	5
42.58	67.074	11.3009	5.05391	81.1059	53.0421	5		70.498	12.6396	5.65259	86.1921	54.8039	5
42.67	62.546	16.7911	7.50919	83.3949	41.6971	5		78.224	17.9162	8.01237	100.47	55.9781	5
42.75	63.134	8.4841	3.79421	73.6684	52.5996	5		71.598	12.7876	5.71877	87.4759	55.7201	5
42.83	59.35	10.1011	4.51736	71.8922	46.8078	5		68.422	13.3625	5.97588	85.0137	51.8303	5
42.92	66.698	15.8289	7.07888	86.3521	47.0439	5		75.766	11.0183	4.92754	89.447	62.085	5
43	65.858	25.8578	11.564	97.9647	33.7513	5		70.232	14.4217	6.44957	88.1389	52.3251	5
43.08	64.79	16.4772	7.36884	85.2492	44.3308	5		78.848	33.4595	14.9635	120.393	37.3026	5
43.17	71.308	24.5127	10.9624	101.745	40.8714	5		76.31	20.393	9.12002	101.631	50.9888	5
43.25	72.954	18.2546	8.16372	95.6201	50.2879	5		75.788	24.3595	10.8939	106.034	45.5416	5
43.33	69.362	14.738	6.59102	87.6616	51.0624	5		71.9	15.042	6.727	90.5772	53.2228	5
43.42	62.352	7.33575	3.28065	71.4605	53.2435	5		70.296	12.787	5.7185	86.1731	54.4189	5
43.5	64.378	16.08	7.19122	84.344	44.412	5		72.848	7.49297	3.35096	82.1518	63.5442	5
43.58	64.096	9.5963	4.29159	76.0114	52.1806	5		72.808	10.391	4.64702	85.7102	59.9058	5
43.67	67.49	10.8096	4.8342	80.9119	54.0681	5		91.438	12.5336	5.60521	107.001	75.8754	5
43.75	68.426	9.53779	4.26543	80.2687	56.5833	5		79.152	9.10888	4.07362	90.4622	67.8418	5
43.83	67.976	19.571	8.75243	92.2766	43.6754	5		85.732	18.8043	8.40953	109.081	62.3834	5
43.92	65.52	10.7479	4.80659	78.8652	52.1748	5		88.524	21.2723	9.51327	114.937	62.1109	5
44	64.602	15.726	7.03289	84.1284	45.0756	5		79.166	13.93	6.22967	96.4623	61.8697	5
44.08	67.008	18.2962	8.1823	89.7257	44.2903	5		84.9	28.8986	12.9239	120.782	49.0176	5
44.17	66.2	15.5792	6.96724	85.5442	46.8558	5		78.674	17.8317	7.97459	100.815	56.533	5
44.25	69.986	12.7373	5.69627	85.8014	54.1706	5		87.26	17.9994	8.0496	109.609	64.9107	5
44.33	70.806	15.5086	6.93564	90.0624	51.5496	5		82.626	13.3919	5.98905	99.2543	65.9977	5
44.42	72.63	21.3083	9.52936	99.0877	46.1723	5		85.678	12.6873	5.67394	101.431	69.9246	5
44.5	70.372	14.4288	6.45276	88.2877	52.4563	5		78.408	11.2775	5.04345	92.4109	64.4051	5
44.58	71.968	17.3864	7.77542	93.556	50.38	5		79.614	17.0753	7.63629	100.816	58.4123	5
44.67	72.786	19.6777	8.80013	97.2191	48.3529	5		82.472	19.5662	8.75029	106.767	58.1773	5
44.75	79.242	23.1861	10.3691	108.031	50.4526	5		75.862	11.8421	5.29596	90.566	61.158	5
44.83	77.864	21.7428	9.72368	104.861	50.8667	5		70.896	5.05235	2.25948	77.1693	64.6227	5
44.92	76.75	24.5409	10.975	107.221	46.2785	5		73.058	6.28157	2.8092	80.8576	65.2584	5
45	70.124	17.3732	7.76953	91.6957	48.5523	5		73.85	12.5756	5.62397	89.4646	58.2354	5
45.08	65.76	14.5617	6.51221	83.8408	47.6792	5		81.218	16.1625	7.22808	101.286	61.1496	5
45.17	72.654	12.795	5.72211	88.5411	56.7669	5		73.534	18.5271	8.28558	96.5385	50.5295	5
45.25	73.144	10.6177	4.74836	86.3276	59.9604	5		77.478	15.4119	6.8924	96.6144	58.3416	5
45.33	74.456	16.161	7.22743	94.5226	54.3894	5		77.028	10.9898	4.91477	90.6736	63.3824	5
45.42	82.08	13.3591	5.97439	98.6676	65.4924	5		71.53	5.99273	2.68003	78.971	64.089	5
45.5	75.726	15.6955	7.01922	95.2145	56.2375	5		73.49	12.712	5.68497	89.274	57.706	5
45.58	68.132	10.4079	4.65457	81.0552	55.2088	5		69.522	8.48322	3.79381	80.0553	58.9887	5
45.67	66.514	11.0119	4.92465	80.187	52.841	5		70.9	11.34	5.07142	84.9805	56.8195	5
45.75	71.624	16.6873	7.46277	92.344	50.904	5		74.726	13.3177	5.95587	91.2621	58.1899	5
45.83	71.812	14.7214	6.58363	90.0911	53.5329	5		68.156	8.33841	3.72905	78.5095	57.8025	5
45.92	70.712	16.3006	7.28984	90.9518	50.4722	5		76.01	14.8284	6.63146	94.4219	57.5981	5
46	68.906	12.431	5.55932	84.3411	53.4709	5		73.816	8.84891	3.95735	84.8034	62.8286	5
46.08	71.086	20.4132	9.12904	96.4323	45.7397	5		80.994	13.4675	6.02284	97.7161	64.2719	5
46.17	72.698	25.5098	11.4083	104.373	41.0234	5		88.108	15.763	7.04941	107.68	68.5357	5
46.25	76.914	22.3792	10.0083	104.701	49.1265	5		89.706	11.2298	5.02213	103.65	75.7623	5
46.33	78.59	20.2336	9.04872	103.713	53.4667	5		88.726	14.3194	6.40384	106.506	70.9461	5
46.42	67.476	16.9674	7.58807	88.5439	46.4081	5		86.622	16.6875	7.46287	107.342	65.9017	5
46.5	68.424	10.6562	4.76561	81.6555	55.1925	5		79.742	14.7285	6.5868	98.0299	61.4541	5
46.58	68.874	17.6743	7.9042	90.8196	46.9284	5		76.334	9.69536	4.3359	88.3724	64.2956	5
46.67	72.124	20.1171	8.99662	97.1026	47.1454	5		78.604	11.8961	5.32011	93.375	63.833	5
46.75	69.54	15.2459	6.81819	88.4703	50.6097	5		71.512	5.68962	2.54448	78.5766	64.4474	5
46.83	71.674	17.4417	7.80018	93.3308	50.0172	5		74.076	10.7322	4.7996	87.4018	60.7502	5
46.92	67.112	12.8613	5.75173	83.0814	51.1426	5		73.91	16.8721	7.54543	94.8595	52.9605	5
47	74.522	21.5458	9.63557	101.275	47.7694	5		76.93	11.0594	4.94594	90.6621	63.1979	5
47.08	74.818	19.7638	8.83864	99.358	50.278	5		71.594	11.3723	5.08584	85.7146	57.4734	5
47.17	80.184	20.9954	9.38945	106.253	54.1147	5		79.178	17.534	7.84146	100.949	57.4066	5
47.25	83.12	21.0979	9.43527	109.317	56.9235	5		81.284	12.132	5.42559	96.3479	66.2201	5
47.33	81.284	21.9742	9.82716	108.569	53.9994	5		74.818	13.0064	5.81664	90.9676	58.6684	5
47.42	81.836	18.723	8.37318	105.084	58.5883	5		74.658	12.1238	5.42193	89.7117	59.6043	5
47.5	81.904	24.9384	11.1528	112.869	50.9389	5		75.588	10.3911	4.64704	88.4903	62.6857	5
47.58	74.138	10.9873	4.91365	87.7805	60.4955	5		83.342	15.722	7.03108	102.863	63.8206	5
47.67	78.784	21.7029	9.70581	105.732	51.8363	5		79.424	17.8479	7.98183	101.585	57.2629	5
47.75	76.15	20.0746	8.97764	101.076	51.2241	5		88.092	18.3327	8.19861	110.855	65.329	5
47.83	76.466	19.5653	8.74986	100.76	52.1725	5		81.92	17.6721	7.90321	103.863	59.9772	5
47.92	79.472	22.7815	10.1882	107.759	51.1851	5		79.572	14.7295	6.58724	97.8611	61.2829	5

## Sheet: Supplementary Figure 1C
			Baseline							+ Tamoxifen						MAP day	Control	Stim1 smKO + vehicle		MAP night	Control	Stim1 smKO + vehicle
Time (h)	Mean	SD	SEM	Upper limit	Lower limit	N		Mean	SD	SEM	Upper limit	Lower limit	N			Mouse 1	100.82	99.3429		Mouse 1	116.969	122.078
0	98	20.5506	9.19053	123.517	72.483	5		107.66	13.18	5.89429	124.025	91.2948	5			Mouse 2	81.43	84.741		Mouse 2	95.5417	96.3364
0.08	97.788	19.1623	8.56966	121.581	73.9948	5		105.07	17.7361	7.93183	127.092	83.0477	5			Mouse 3	86.2569	88.7969		Mouse 3	110.643	109.394
0.17	91.666	19.0737	8.53003	115.349	67.9828	5		103.346	13.0842	5.85145	119.592	87.0998	5			Mouse 4	75.118	86.5904		Mouse 4	87.4832	102.93
0.25	85.672	17.9723	8.03746	107.988	63.3564	5		93.662	11.3907	5.09406	107.805	79.5186	5			Mouse 5	83.1338	84.7599		Mouse 5	96.433	94.5096
0.33	92.944	27.1982	12.1634	126.715	59.173	5		87.224	10.3752	4.63993	100.107	74.3415	5
0.42	97.964	24.1357	10.7938	127.932	67.9955	5		85.772	19.1216	8.55146	109.515	62.0294	5		Paired t test				Paired t test
0.5	89.934	18.9342	8.46765	113.444	66.424	5		96.084	19.3532	8.655	120.114	72.0539	5		P value	0.1801			P value	0.3191
0.58	96.33	17.1337	7.66244	117.604	75.0556	5		94.562	22.7212	10.1612	122.774	66.3499	5		Significantly different (P < 0.05)?	No			Significantly different (P < 0.05)?	No
0.67	92.512	10.4488	4.67284	105.486	79.5381	5		105.95	19.4315	8.69004	130.077	81.8226	5		One- or two-tailed P value?	Two-tailed			One- or two-tailed P value?	Two-tailed
0.75	92.04	11.47	5.12954	106.282	77.7981	5		98.298	24.9452	11.1558	129.272	67.3244	5
0.83	96.642	8.88181	3.97206	107.67	85.6138	5		92.31	14.6881	6.56874	110.548	74.0723	5		Mean of differences (B - A)	3.494			Mean of differences (B - A)	3.635
0.92	94.598	4.00372	1.79052	99.5693	89.6267	5		98.532	14.35	6.41751	116.35	80.7141	5		SD of differences	4.817			SD of differences	7.15
1	98.404	15.8088	7.06989	118.033	78.7748	5		87.246	15.13	6.76633	106.032	68.4597	5		SEM of differences	2.154			SEM of differences	3.198
1.08	101.462	24.6533	11.0253	132.073	70.8509	5		100.014	17.7414	7.9342	122.043	77.9851	5		95% confidence interval	-2.486 to 9.475			95% confidence interval	-5.243 to 12.51
1.17	101.888	20.4478	9.14453	127.277	76.4987	5		106.066	12.696	5.67784	121.83	90.3018	5
1.25	103.432	22.9929	10.2828	131.982	74.8825	5		109.09	12.2694	5.48703	124.324	93.8556	5
1.33	102.604	23.0259	10.2975	131.194	74.0136	5		112.93	13.4357	6.00861	129.613	96.2474	5
1.42	104.97	15.3804	6.87833	124.067	85.8727	5		116.2	12.1621	5.43905	131.301	101.099	5
1.5	105.332	15.0109	6.71307	123.97	86.6935	5		110.392	7.30267	3.26585	119.459	101.325	5
1.58	106.34	15.2901	6.83793	125.325	87.3549	5		104.028	21.0797	9.42713	130.202	77.8541	5
1.67	105.26	14.8353	6.63454	123.68	86.8396	5		107.558	16.881	7.5494	128.519	86.5975	5
1.75	102.73	11.3564	5.07872	116.831	88.6292	5		115.966	19.2917	8.62751	139.92	92.0122	5
1.83	102.496	9.68137	4.32964	114.517	90.475	5		114.904	14.1151	6.31245	132.43	97.3778	5
1.92	102.74	12.6024	5.63595	118.388	87.0921	5		108.336	10.9972	4.9181	121.991	94.6812	5
2	106.938	14.3321	6.40953	124.734	89.1423	5		108	10.5886	4.73536	121.147	94.8525	5
2.08	101.778	16.7353	7.48426	122.558	80.9984	5		113.756	11.8715	5.30908	128.496	99.0156	5
2.17	103.502	16.6218	7.4335	124.141	82.8633	5		105.254	14.4736	6.4728	123.225	87.2826	5
2.25	105.014	11.5071	5.14613	119.302	90.7261	5		108.594	8.12837	3.63512	118.687	98.5013	5
2.33	101.366	10.735	4.80085	114.695	88.0367	5		110.578	9.41127	4.20885	122.264	98.8924	5
2.42	99.502	9.73102	4.35184	111.585	87.4193	5		112.148	14.9828	6.70051	130.752	93.5444	5
2.5	101.552	8.93623	3.99641	112.648	90.4562	5		102.344	14.7914	6.61492	120.71	83.978	5
2.58	110.36	19.6904	8.8058	134.809	85.9112	5		104.726	11.0661	4.94891	118.466	90.9856	5
2.67	102.43	19.9164	8.9069	127.16	77.7005	5		108.35	27.4743	12.2869	142.464	74.2362	5
2.75	101.002	17.5902	7.86655	122.843	79.1609	5		87.052	13.2158	5.91027	103.462	70.6425	5
2.83	100.47	20.4671	9.15316	125.883	75.0568	5		94.698	12.478	5.58033	110.191	79.2045	5
2.92	98.2	24.5347	10.9723	128.664	67.7361	5		103.866	15.0237	6.71881	122.52	85.2116	5
3	94.756	20.2077	9.03717	119.847	69.6648	5		93.492	16.8563	7.53835	114.422	72.5622	5
3.08	97.47	21.5524	9.63851	124.231	70.7092	5		101.236	13.64	6.09998	118.172	84.2998	5
3.17	92.812	18.2215	8.1489	115.437	70.187	5		105.312	12.1566	5.43662	120.406	90.2175	5
3.25	95.914	17.8646	7.9893	118.096	73.7321	5		100.606	19.6527	8.78897	125.008	76.2039	5
3.33	95.094	14.7771	6.60854	113.442	76.7457	5		100.276	24.2341	10.8378	130.367	70.1854	5
3.42	104.55	15.1224	6.76294	123.327	85.7731	5		104.512	12.8097	5.72865	120.417	88.6067	5
3.5	100.95	7.86751	3.51846	110.719	91.1812	5		106.832	23.2498	10.3976	135.7	77.9636	5
3.58	100.66	11.1732	4.99682	114.533	86.7866	5		109.29	25.5412	11.4224	141.004	77.5764	5
3.67	101.574	10.6276	4.75279	114.77	88.3781	5		99.666	19.3175	8.63904	123.652	75.6802	5
3.75	104.256	9.3229	4.16933	115.832	92.6801	5		97.296	7.94387	3.55261	107.16	87.4324	5
3.83	102.304	16.1968	7.24343	122.415	82.193	5		111.448	20.5485	9.18955	136.962	85.9337	5
3.92	110.18	23.4347	10.4803	139.278	81.082	5		100.442	13.7943	6.169	117.57	83.3141	5
4	109.968	19.048	8.51852	133.619	86.3168	5		110.412	12.4164	5.55277	125.829	94.995	5
4.08	107.028	8.97589	4.01414	118.173	95.883	5		114.204	10.3746	4.63966	127.086	101.322	5
4.17	112.6	6.70843	3.0001	120.93	104.27	5		107.698	16.2863	7.28346	127.92	87.4759	5
4.25	113.43	21.8015	9.74993	140.5	86.3599	5		107.622	11.3265	5.06538	121.686	93.5583	5
4.33	101.902	11.2846	5.04662	115.914	87.8903	5		111.38	17.8949	8.00286	133.599	89.1605	5
4.42	101.12	10.4846	4.68887	114.138	88.1016	5		104.876	23.814	10.6499	134.445	75.307	5
4.5	105.138	10.0497	4.49437	117.616	92.6596	5		105.95	18.4106	8.23346	128.81	83.0902	5
4.58	107.01	11.7689	5.2632	121.623	92.397	5		103.586	14.7557	6.59897	121.908	85.2643	5
4.67	106.994	12.3665	5.53047	122.349	91.6389	5		108.974	19.221	8.59591	132.84	85.1079	5
4.75	99.03	10.1492	4.53887	111.632	86.4281	5		107.12	18.3909	8.22466	129.955	84.2847	5
4.83	94.246	6.6838	2.98908	102.545	85.947	5		101.614	17.7335	7.93066	123.633	79.595	5
4.92	96.912	13.6203	6.09118	113.824	80.0002	5		109.292	11.3342	5.06882	123.365	95.2187	5
5	99.044	26.0302	11.641	131.365	66.7233	5		108.744	24.2825	10.8595	138.895	78.5933	5
5.08	102.376	23.8743	10.6769	132.02	72.7321	5		108.038	11.8574	5.3028	122.761	93.3151	5
5.17	99.668	17.6568	7.89634	121.592	77.7442	5		105.494	17.2201	7.70108	126.876	84.1124	5
5.25	99.134	18.4567	8.25411	122.051	76.2169	5		99.48	12.3333	5.51562	114.794	84.1662	5
5.33	106.644	9.57514	4.28213	118.533	94.7549	5		98.294	16.0213	7.16495	118.187	78.4009	5
5.42	105.092	21.1194	9.4449	131.315	78.8687	5		96.53	25.7774	11.528	128.537	64.5232	5
5.5	106.004	16.2396	7.26258	126.168	85.8398	5		98.446	17.9369	8.02164	120.718	76.1744	5
5.58	100.118	17.5296	7.83949	121.884	78.3521	5		97.094	20.5541	9.19208	122.615	71.5727	5
5.67	106.508	17.4454	7.80182	128.169	84.8467	5		100.174	19.9969	8.94291	125.003	75.3445	5
5.75	102.13	17.2924	7.7334	123.601	80.6586	5		98.596	16.6103	7.42836	119.22	77.9716	5
5.83	102.226	8.29257	3.70855	112.523	91.9294	5		98.532	18.5936	8.31533	121.619	75.445	5
5.92	104.942	9.27841	4.14943	116.463	93.4213	5		86.832	7.81551	3.4952	96.5362	77.1278	5
6	115.616	13.8235	6.18206	132.78	98.4518	5		104.394	30.0323	13.4309	141.684	67.1039	5
6.08	103.738	14.2421	6.36928	121.422	86.054	5		100.454	26.1935	11.7141	132.978	67.9304	5
6.17	100.294	6.86217	3.06886	108.815	91.7735	5		106.748	19.844	8.8745	131.388	82.1084	5
6.25	102.182	16.7855	7.5067	123.024	81.3401	5		108.668	25.1399	11.2429	139.883	77.4527	5
6.33	100.302	13.8655	6.20082	117.518	83.0858	5		107.128	21.8253	9.76056	134.228	80.0283	5
6.42	106.008	13.4232	6.00304	122.675	89.3409	5		110.948	23.6359	10.5703	140.296	81.6001	5
6.5	108.022	4.95801	2.21729	114.178	101.866	5		108.482	18.5061	8.27618	131.46	85.5036	5
6.58	103.13	15.2179	6.80564	122.025	84.2345	5		118.844	26.4458	11.8269	151.681	86.0072	5
6.67	99.144	10.719	4.79366	112.453	85.8347	5		117.604	12.1313	5.42528	132.667	102.541	5
6.75	96.316	9.94335	4.4468	108.662	83.9697	5		112.754	13.9059	6.21892	130.02	95.4875	5
6.83	96.69	10.8512	4.85282	110.164	83.2164	5		110.974	14.0339	6.27613	128.399	93.5487	5
6.92	103.97	18.7116	8.36806	127.203	80.7365	5		116.918	20.0943	8.98646	141.868	91.9676	5
7	106.268	23.5334	10.5245	135.489	77.0474	5		111.924	13.4094	5.99686	128.574	95.2741	5
7.08	95.004	15.0342	6.72351	113.671	76.3365	5		103.764	12.9201	5.77805	119.806	87.7216	5
7.17	90.516	11.3257	5.065	104.579	76.4533	5		99.144	7.10311	3.17661	107.964	90.3243	5
7.25	97.858	14.7499	6.59635	116.172	79.5436	5		108.504	25.5082	11.4076	140.177	76.8314	5
7.33	95.108	9.16327	4.09794	106.486	83.7303	5		102.006	31.5557	14.1122	141.188	62.8244	5
7.42	96.598	7.05203	3.15376	105.354	87.8418	5		95.752	32.5348	14.55	136.149	55.3547	5
7.5	103.18	14.9287	6.67632	121.716	84.6436	5		101.132	28.6378	12.8072	136.691	65.5735	5
7.58	93.342	20.5283	9.18054	118.831	67.8527	5		93.178	23.0172	10.2936	121.758	64.5983	5
7.67	101.916	17.3572	7.7624	123.468	80.3641	5		105.944	28.7225	12.8451	141.608	70.2803	5
7.75	101.882	24.2479	10.844	131.99	71.7743	5		106.462	22.1906	9.92394	134.015	78.9087	5
7.83	92.606	16.0457	7.17586	112.529	72.6826	5		94.074	13.2857	5.94156	110.57	77.5776	5
7.92	94.682	13.576	6.07135	111.539	77.8252	5		100.734	19.6598	8.79212	125.145	76.3232	5
8	97.23	14.3046	6.39722	114.992	79.4685	5		101.422	20.6724	9.24499	127.09	75.7538	5
8.08	101.506	13.5578	6.06322	118.34	84.6718	5		96.176	15.9268	7.1227	115.952	76.4002	5
8.17	104.08	19.7725	8.84253	128.631	79.5292	5		84.81	13.0417	5.83243	101.003	68.6166	5
8.25	98.706	22.6787	10.1422	126.865	70.5466	5		90.29	16.7802	7.50432	111.125	69.4547	5
8.33	104.43	16.191	7.24085	124.534	84.3262	5		98.526	19.7395	8.82779	123.036	74.0161	5
8.42	105.312	19.5967	8.7639	129.644	80.9795	5		108.046	10.7438	4.80478	121.386	94.7058	5
8.5	103.938	18.8176	8.41548	127.303	80.5729	5		114.6	16.155	7.22473	134.659	94.5409	5
8.58	98.962	14.2496	6.37263	116.655	81.2687	5		115.75	26.1763	11.7064	148.252	83.2479	5
8.67	103.5	12.233	5.47076	118.689	88.3107	5		115.284	29.9801	13.4075	152.509	78.0588	5
8.75	95.298	15.3332	6.85723	114.337	76.2593	5		105.89	23.8407	10.6619	135.492	76.2879	5
8.83	103.208	16.4561	7.35939	123.641	82.7751	5		103.658	29.8119	13.3323	140.674	66.6416	5
8.92	103.438	13.6261	6.0938	120.357	86.5189	5		100.356	18.0503	8.07235	122.768	77.9436	5
9	103.714	13.4747	6.02607	120.445	86.9829	5		109.006	18.0357	8.0658	131.4	86.6117	5
9.08	94.604	7.107	3.17835	103.429	85.7795	5		100.89	19.5182	8.72881	125.125	76.6549	5
9.17	97.62	9.30374	4.16076	109.172	86.0679	5		97.876	21.9842	9.83162	125.173	70.579	5
9.25	107.686	21.5147	9.62165	134.4	80.972	5		94.88	22.2271	9.94026	122.479	67.2814	5
9.33	108.142	17.9931	8.04676	130.483	85.8006	5		98.47	14.7101	6.57856	116.735	80.205	5
9.42	100.1	24.6674	11.0316	130.729	69.4714	5		93.102	13.0234	5.82423	109.273	76.9313	5
9.5	106.24	24.151	10.8007	136.227	76.2525	5		112.074	19.8159	8.86194	136.679	87.4693	5
9.58	100.466	21.5462	9.63575	127.219	73.7129	5		107.858	11.1139	4.97028	121.658	94.0583	5
9.67	107.922	20.8181	9.31014	133.771	82.0729	5		105.986	3.61584	1.61705	110.476	101.496	5
9.75	94.944	7.0686	3.16117	103.721	86.1672	5		97.002	19.2641	8.61517	120.922	73.0824	5
9.83	96.384	11.9556	5.34672	111.229	81.5391	5		108.442	17.104	7.64915	129.679	87.2046	5
9.92	109.7	24.4916	10.953	140.11	79.2897	5		109.754	15.0286	6.72098	128.414	91.0936	5
10	103.458	13.0005	5.814	119.6	87.3157	5		108.596	13.8068	6.1746	125.739	91.4526	5
10.08	99.344	13.6717	6.11417	116.32	82.3683	5		98.946	16.2422	7.26375	119.113	78.7786	5
10.17	98.026	18.4777	8.26346	120.969	75.083	5		96.888	14.9172	6.67117	115.41	78.3659	5
10.25	104.234	16.0634	7.18378	124.179	84.2886	5		102.822	19.1129	8.54753	126.554	79.0903	5
10.33	104.286	8.24236	3.6861	114.52	94.0518	5		113.18	25.5503	11.4264	144.905	81.4552	5
10.42	106.712	15.4058	6.88967	125.841	87.5832	5		106.62	23.2842	10.413	135.531	77.7089	5
10.5	106.14	12.5789	5.62547	121.759	90.5212	5		99.668	13.4381	6.0097	116.354	82.9824	5
10.58	100.004	11.4318	5.11245	114.198	85.8096	5		101.296	12.4666	5.57524	116.775	85.8166	5
10.67	105.456	12.2754	5.48975	120.698	90.214	5		115.732	17.4217	7.79123	137.364	94.1001	5
10.75	93.702	13.0055	5.81626	109.851	77.5535	5		97.526	13.0593	5.8403	113.741	81.3107	5
10.83	100.59	11.728	5.24492	115.152	86.0278	5		95.938	19.0682	8.52757	119.614	72.2617	5
10.92	100.86	16.185	7.23817	120.956	80.7636	5		102.598	20.5848	9.20582	128.157	77.0385	5
11	106.196	14.0411	6.27936	123.63	88.7617	5		102.99	17.1799	7.6831	124.322	81.6583	5
11.08	108.968	18.5391	8.29095	131.987	85.9486	5		104.836	18.3434	8.2034	127.612	82.0597	5
11.17	108.584	14.3283	6.4078	126.375	90.7931	5		102.512	14.0051	6.26328	119.902	85.1223	5
11.25	104.062	16.211	7.24976	124.191	83.9334	5		104.206	6.42342	2.87264	112.182	96.2303	5
11.33	102.55	17.2604	7.71909	123.982	81.1184	5		97.468	15.776	7.05526	117.057	77.8795	5
11.42	99.896	12.9919	5.81015	116.028	83.7644	5		105.91	12.5387	5.6075	121.479	90.3411	5
11.5	106.072	10.4821	4.68772	119.087	93.0568	5		106.02	12.2413	5.47446	121.22	90.8205	5
11.58	106.964	14.0779	6.29583	124.444	89.484	5		115.958	18.5045	8.27544	138.934	92.9817	5
11.67	107.746	9.38034	4.19502	119.393	96.0988	5		108.778	19.4163	8.68321	132.886	84.6695	5
11.75	107.784	11.4284	5.11095	121.974	93.5937	5		102.12	20.1822	9.02575	127.179	77.0605	5
11.83	105.926	12.6297	5.64817	121.608	90.2442	5		103.23	20.0859	8.98268	128.17	78.2901	5
11.92	105.786	6.6236	2.96216	114.01	97.5617	5		102.54	13.6293	6.09519	119.463	85.617	5
12	102.1	7.86343	3.51663	111.864	92.3363	5		110.018	9.71647	4.34534	122.083	97.9534	5
12.08	107.012	9.65212	4.31656	118.997	95.0273	5		109.684	15.81	7.07045	129.315	90.0533	5
12.17	106.966	10.3224	4.61633	119.783	94.149	5		116.048	16.9064	7.56079	137.04	95.0559	5
12.25	104.602	10.7132	4.7911	117.904	91.2998	5		113.758	15.6106	6.98127	133.141	94.3749	5
12.33	104.006	8.72469	3.9018	114.839	93.1729	5		102.348	21.2414	9.49943	128.723	75.9734	5
12.42	105.66	7.57728	3.38866	115.068	96.2516	5		98.01	14.6814	6.56572	116.239	79.7807	5
12.5	101.008	5.39499	2.41272	107.707	94.3092	5		94.854	10.9593	4.90117	108.462	81.2462	5
12.58	97.55	16.8601	7.54005	118.485	76.6155	5		88.166	18.5459	8.29399	111.194	65.1382	5
12.67	99.282	9.86624	4.41232	111.533	87.0314	5		82.924	14.2585	6.37659	100.628	65.2198	5
12.75	105.08	17.2073	7.69534	126.446	83.7143	5		80.918	14.3483	6.41678	98.7338	63.1022	5
12.83	102.898	21.9839	9.83149	130.195	75.6014	5		83.542	9.50714	4.25172	95.3467	71.7373	5
12.92	96.616	9.24294	4.13357	108.093	85.1394	5		88.882	19.5987	8.7648	113.217	64.547	5
13	89	5.2199	2.33441	95.4814	82.5186	5		88.622	10.5771	4.73023	101.755	75.4888	5
13.08	89.476	14.2891	6.39026	107.218	71.7338	5		92.238	14.4348	6.45544	110.161	74.3148	5
13.17	91.042	11.3986	5.09763	105.195	76.8887	5		95.346	11.1445	4.98398	109.184	81.5082	5
13.25	93.992	13.6331	6.09692	110.92	77.0642	5		91.132	13.4919	6.03375	107.884	74.3796	5
13.33	92.372	13.5278	6.04983	109.169	75.575	5		93.878	26.5593	11.8777	126.856	60.9003	5
13.42	96.438	9.84802	4.40417	108.666	84.2101	5		89.868	15.2456	6.81806	108.798	70.938	5
13.5	97.62	9.56871	4.27926	109.501	85.7389	5		87.95	9.5733	4.28131	99.8368	76.0632	5
13.58	89.272	14.222	6.36025	106.931	71.6131	5		86.312	9.12162	4.07931	97.638	74.986	5
13.67	83.124	13.0561	5.83885	99.3353	66.9127	5		84.496	7.6159	3.40593	93.9524	75.0396	5
13.75	83.746	12.7245	5.69055	99.5455	67.9465	5		93.326	16.1019	7.20099	113.319	73.3328	5
13.83	88.476	16.304	7.29138	108.72	68.2319	5		83.33	13.4421	6.0115	100.021	66.6394	5
13.92	92.442	14.1943	6.34787	110.066	74.8175	5		89.368	19.3133	8.63718	113.349	65.3873	5
14	88.494	14.0447	6.28098	105.933	71.0552	5		91.676	22.0157	9.84572	119.012	64.3399	5
14.08	84.796	14.3418	6.41385	102.604	66.9883	5		96.666	15.422	6.89693	115.815	77.517	5
14.17	85.74	11.3708	5.08519	99.8588	71.6212	5		91.386	18.0833	8.08711	113.839	68.9326	5
14.25	90.202	22.2379	9.94508	117.814	62.59	5		92.39	15.6269	6.98858	111.793	72.9866	5
14.33	82.876	14.274	6.38351	100.599	65.1525	5		93.124	17.9694	8.03615	115.436	70.8121	5
14.42	77.972	11.4078	5.10172	92.1366	63.8074	5		88.892	17.5166	7.83366	110.642	67.1423	5
14.5	81.67	10.704	4.78698	94.9608	68.3792	5		92.236	13.6751	6.11569	109.216	75.2561	5
14.58	84.216	14.2254	6.36181	101.879	66.5528	5		90.21	16.9799	7.59366	111.293	69.1266	5
14.67	80.606	10.7045	4.78718	93.8973	67.3147	5		82.192	6.89757	3.08469	90.7565	73.6275	5
14.75	84.706	11.8028	5.27835	99.3611	70.0509	5		85.956	9.74235	4.35691	98.0527	73.8593	5
14.83	89.11	16.4583	7.36039	109.546	68.6743	5		84.408	9.20576	4.11694	95.8385	72.9775	5
14.92	86.268	12.8951	5.76687	102.279	70.2566	5		80.706	7.5009	3.3545	90.0196	71.3924	5
15	86.336	11.4203	5.10733	100.516	72.1558	5		78.422	7.45377	3.33343	87.6771	69.1669	5
15.08	81.158	11.6503	5.21015	95.6237	66.6923	5		78.538	2.60716	1.16596	81.7752	75.3008	5
15.17	84.012	12.2065	5.45889	99.1683	68.8557	5		77.426	6.38367	2.85486	85.3524	69.4996	5
15.25	88.426	16.2663	7.27453	108.623	68.2287	5		85.358	7.81014	3.4928	95.0556	75.6604	5
15.33	87.37	12.0105	5.37128	102.283	72.4569	5		76.072	5.86759	2.62407	83.3576	68.7864	5
15.42	83.754	12.1377	5.42813	98.8249	68.6831	5		79.23	11.7185	5.24067	93.7804	64.6796	5
15.5	78.556	6.26491	2.80175	86.3349	70.7771	5		82.868	9.19348	4.11145	94.2832	71.4528	5
15.58	86.756	16.1962	7.24317	106.866	66.6457	5		83.232	10.8965	4.87306	96.7618	69.7022	5
15.67	84.394	12.1691	5.4422	99.504	69.284	5		82.966	6.18492	2.76598	90.6456	75.2864	5
15.75	87.752	18.1729	8.12719	110.317	65.1873	5		80.49	3.31445	1.48227	84.6054	76.3746	5
15.83	81.004	20.6837	9.25003	106.686	55.3218	5		79.422	5.61264	2.51005	86.391	72.453	5
15.92	92.312	24.0437	10.7527	122.166	62.4579	5		83.006	10.4504	4.67356	95.9819	70.0301	5
16	89.984	14.432	6.45417	107.904	72.0644	5		95.648	13.672	6.1143	112.624	78.672	5
16.08	90.088	14.6426	6.54835	108.269	71.9069	5		88.61	11.834	5.29232	103.304	73.9162	5
16.17	92.374	14.058	6.28694	109.829	74.9187	5		98.394	17.9986	8.04922	120.742	76.0458	5
16.25	88.64	13.9847	6.25413	106.004	71.2758	5		98.562	15.799	7.06551	118.179	78.945	5
16.33	82.09	16.8596	7.53984	103.024	61.1561	5		94.598	13.3018	5.94873	111.114	78.0817	5
16.42	84.65	9.77329	4.37075	96.7851	72.5149	5		88.916	9.80941	4.3869	101.096	76.736	5
16.5	77.758	10.1232	4.52724	90.3276	65.1884	5		84.158	11.3482	5.07507	98.2486	70.0674	5
16.58	79.564	9.69989	4.33792	91.608	67.52	5		85.912	13.1612	5.88586	102.254	69.5702	5
16.67	84.15	23.0431	10.3052	112.762	55.5382	5		82.59	12.6738	5.66788	98.3266	66.8534	5
16.75	90.106	10.4799	4.68675	103.119	77.0935	5		80.866	15.2809	6.83381	99.8397	61.8923	5
16.83	91.186	15.4933	6.92882	110.423	71.9485	5		82.448	13.8762	6.20561	99.6775	65.2185	5
16.92	91.142	9.15494	4.09421	102.509	79.7746	5		78.822	12.941	5.78738	94.8904	62.7536	5
17	87.092	14.7666	6.60384	105.427	68.7568	5		82.654	8.60534	3.84842	93.3389	71.9691	5
17.08	86.554	14.0271	6.27309	103.971	69.1371	5		77.054	8.81539	3.94236	87.9997	66.1083	5
17.17	86.338	13.349	5.96987	102.913	69.763	5		73.242	6.70082	2.9967	81.5622	64.9218	5
17.25	87.876	21.5757	9.64896	114.666	61.0862	5		80.848	4.73693	2.11842	86.7297	74.9663	5
17.33	87.596	17.6689	7.90176	109.535	65.6572	5		85.93	12.0157	5.37359	100.849	71.0105	5
17.42	89.474	23.4352	10.4805	118.573	60.3754	5		84.114	12.3434	5.52016	99.4404	68.7876	5
17.5	83.142	13.3924	5.98926	99.7708	66.5132	5		89.4	16.2435	7.26431	109.569	69.231	5
17.58	86.168	19.7578	8.83597	110.701	61.6354	5		83.882	11.8983	5.32108	98.6557	69.1083	5
17.67	81.914	16.736	7.48456	102.694	61.1335	5		92.286	17.9906	8.04564	114.624	69.9477	5
17.75	85.468	20.3247	9.08948	110.704	60.2316	5		84.446	21.4466	9.59123	111.076	57.8165	5
17.83	77.4	14.1055	6.30818	94.9143	59.8857	5		87.074	19.9638	8.92808	111.862	62.2857	5
17.92	74.602	9.00744	4.02825	85.7862	63.4178	5		86.702	20.2033	9.03517	111.788	61.6163	5
18	80.776	15.4299	6.90048	99.9348	61.6172	5		95.522	13.7139	6.13303	112.55	78.494	5
18.08	82.618	15.9018	7.11149	102.363	62.8733	5		90.146	16.3271	7.3017	110.419	69.8732	5
18.17	82.964	15.9679	7.14108	102.791	63.1372	5		85.974	20.5363	9.18413	111.473	60.4748	5
18.25	85.682	13.3457	5.96839	102.253	69.1111	5		87.024	13.9583	6.24232	104.355	69.6925	5
18.33	85.868	11.0257	4.93086	99.5583	72.1777	5		88.928	19.3997	8.67582	113.016	64.84	5
18.42	80.664	13.4323	6.0071	97.3424	63.9856	5		82.886	14.6574	6.555	101.086	64.6864	5
18.5	85.76	9.69737	4.3368	97.8009	73.7191	5		76.904	10.8185	4.83819	90.337	63.471	5
18.58	76.618	11.0234	4.9298	90.3053	62.9307	5		79.124	16.1121	7.20557	99.1299	59.1181	5
18.67	80.22	7.32133	3.2742	89.3106	71.1294	5		86.324	13.432	6.00696	103.002	69.646	5
18.75	81.906	7.69893	3.44306	91.4655	72.3465	5		83.524	10.4156	4.65799	96.4567	70.5913	5
18.83	87.036	20.823	9.31231	112.891	61.1809	5		90.442	11.6726	5.22013	104.935	75.9486	5
18.92	93.372	22.145	9.90355	120.869	65.8753	5		87.126	14.3818	6.43173	104.983	69.2686	5
19	86.614	19.2712	8.61836	110.542	62.6856	5		85.046	19.9293	8.91264	109.791	60.3006	5
19.08	88.248	32.8321	14.683	129.014	47.4815	5		77.468	8.22957	3.68038	87.6864	67.2496	5
19.17	81.808	16.1624	7.22807	101.876	61.7397	5		83.456	10.0049	4.47433	95.8787	71.0333	5
19.25	74.444	9.76376	4.36648	86.5673	62.3207	5		77.042	6.21345	2.77874	84.757	69.327	5
19.33	72.074	13.3612	5.97533	88.6642	55.4838	5		77.762	5.88217	2.63059	85.0657	70.4583	5
19.42	67.7	5.73923	2.56666	74.8262	60.5738	5		85.102	15.6395	6.99418	104.521	65.683	5
19.5	72.314	6.72657	3.00821	80.6661	63.9619	5		95.508	23.229	10.3883	124.351	66.6654	5
19.58	73.28	10.8983	4.87385	86.812	59.748	5		92.686	21.1658	9.46564	118.967	66.4052	5
19.67	70.45	9.53425	4.26384	82.2883	58.6117	5		94.272	24.649	11.0234	124.878	63.6662	5
19.75	74.652	21.4177	9.57827	101.246	48.0585	5		81.15	12.8448	5.74436	97.0989	65.2011	5
19.83	73.35	22.4455	10.0379	101.22	45.4802	5		88.898	16.4181	7.34241	109.284	68.5122	5
19.92	75.348	18.9757	8.48617	98.9094	51.7866	5		82.686	17.3458	7.75728	104.224	61.1483	5
20	78.394	16.8975	7.5568	99.3751	57.4129	5		80.03	16.5509	7.40179	100.581	59.4793	5
20.08	85.688	23.2163	10.3827	114.515	56.8611	5		81.794	14.1298	6.31905	99.3385	64.2495	5
20.17	78.972	25.6692	11.4796	110.845	47.0994	5		76.336	10.7543	4.80947	89.6892	62.9828	5
20.25	84.036	21.1777	9.47095	110.332	57.7404	5		78.614	14.3732	6.4279	96.4607	60.7673	5
20.33	80.974	19.1393	8.55935	104.739	57.2094	5		79.694	11.2208	5.01811	93.6265	65.7615	5
20.42	98.71	23.0934	10.3277	127.384	70.0358	5		79.086	11.0122	4.92482	92.7595	65.4125	5
20.5	104.092	32.6627	14.6072	144.648	63.536	5		78.758	9.02945	4.03809	89.9695	67.5465	5
20.58	87.832	16.7486	7.49022	108.628	67.0358	5		79.538	19.8111	8.85979	104.137	54.9393	5
20.67	87.128	10.604	4.74224	100.295	73.9614	5		90.946	24.8272	11.1031	121.773	60.1189	5
20.75	85.022	15.4712	6.91895	104.232	65.8119	5		98.256	24.416	10.9191	128.572	67.9396	5
20.83	85.374	16.0995	7.1999	105.364	65.3839	5		95.302	25.8413	11.5566	127.388	63.2157	5
20.92	80.496	11.9203	5.3309	95.2969	65.6951	5		91.57	24.1965	10.821	121.614	61.5261	5
21	83.52	6.63173	2.9658	91.7544	75.2856	5		82.104	17.3581	7.76277	103.657	60.5511	5
21.08	80.046	10.7736	4.81811	93.4232	66.6688	5		85.872	14.4581	6.46588	103.824	67.9198	5
21.17	78.456	9.27744	4.149	89.9755	66.9365	5		82.522	14.1555	6.33052	100.098	64.9457	5
21.25	81.046	15.8596	7.09262	100.738	61.3537	5		78.418	22.1331	9.89823	105.9	50.9361	5
21.33	80.502	12.8335	5.7393	96.4368	64.5672	5		79.996	18.0916	8.09083	102.46	57.5323	5
21.42	74.234	5.59583	2.50253	81.1821	67.2859	5		82.482	12.5719	5.62235	98.0921	66.8719	5
21.5	79.312	15.4596	6.91373	98.5076	60.1164	5		85.97	13.8057	6.17409	103.112	68.828	5
21.58	79.996	15.4801	6.92289	99.217	60.775	5		91.646	23.2656	10.4047	120.534	62.7579	5
21.67	79.794	12.5679	5.62056	95.3992	64.1888	5		95.828	25.7453	11.5136	127.795	63.861	5
21.75	85.722	11.2617	5.0364	99.7053	71.7387	5		86.572	14.8241	6.62952	104.978	68.1655	5
21.83	82.496	18.7474	8.38411	105.774	59.218	5		81.398	14.4733	6.47267	99.369	63.427	5
21.92	76.104	18.3613	8.21141	98.9025	53.3055	5		79.138	12.8951	5.76686	95.1494	63.1266	5
22	75.086	13.9027	6.21748	92.3485	57.8235	5		74.73	6.42756	2.87449	82.7109	66.7491	5
22.08	78.548	20.7713	9.28923	104.339	52.757	5		84.912	18.2378	8.15618	107.557	62.2668	5
22.17	76.13	13.5351	6.05309	92.9361	59.3239	5		94.248	24.3875	10.9064	124.529	63.967	5
22.25	80.298	20.788	9.29669	106.11	54.4863	5		98.822	33.8802	15.1517	140.89	56.7542	5
22.33	75.164	16.6574	7.44939	95.8468	54.4812	5		89.54	25.9725	11.6152	121.789	57.2909	5
22.42	75.246	4.30814	1.92666	80.5953	69.8967	5		91.58	25.5633	11.4323	123.321	59.8389	5
22.5	82.754	17.2715	7.72406	104.199	61.3086	5		97.97	21.3733	9.55844	124.508	71.4315	5
22.58	78.84	12.1618	5.43893	93.9409	63.7391	5		95.708	12.6565	5.66014	111.423	79.9929	5
22.67	80.084	18.1706	8.12616	102.646	57.5222	5		86.816	8.93499	3.99585	97.9103	75.7217	5
22.75	83.634	19.5739	8.75372	107.938	59.3298	5		86.76	15.5264	6.94363	106.039	67.4814	5
22.83	88.926	16.2092	7.24896	109.052	68.7996	5		86.066	9.74493	4.35806	98.1659	73.9661	5
22.92	97.98	8.44181	3.77529	108.462	87.4981	5		92.568	13.8287	6.18438	109.739	75.3974	5
23	95.196	3.27228	1.46341	99.2591	91.1329	5		84.282	10.0146	4.47866	96.7167	71.8473	5
23.08	93.002	12.8549	5.74889	108.963	77.0405	5		87.048	14.9386	6.68072	105.597	68.4993	5
23.17	87.828	8.86293	3.96362	98.8328	76.8232	5		94.038	26.7279	11.9531	127.225	60.8509	5
23.25	93.078	21.9922	9.83521	120.385	65.7711	5		102.132	14.2554	6.37522	119.832	84.4316	5
23.33	87.582	13.5613	6.06481	104.421	70.7434	5		95.45	11.3169	5.06106	109.502	81.3983	5
23.42	90.986	25.9256	11.5943	123.177	58.7951	5		103.844	24.3962	10.9103	134.136	73.5522	5
23.5	84.83	20.2124	9.03927	109.927	59.733	5		105.244	14.8825	6.65568	123.723	86.7649	5
23.58	86.914	18.0028	8.05111	109.267	64.5605	5		93.408	21.8663	9.77893	120.559	66.2573	5
23.67	82.524	13.6113	6.08714	99.4246	65.6234	5		89.936	17.1562	7.6725	111.238	68.6337	5
23.75	90.868	23.5711	10.5413	120.135	61.6006	5		88.804	22.3027	9.97405	116.496	61.1116	5
23.83	88.188	26.852	12.0086	121.529	54.8468	5		95.538	27.4698	12.2848	129.646	61.4298	5
23.92	92.798	16.8408	7.53142	113.709	71.8874	5		92.81	25.3291	11.3275	124.26	61.3597	5
24	94.334	19.3831	8.66839	118.401	70.2667	5		93.18	23.5714	10.5414	122.448	63.9123	5
24.08	96.232	28.282	12.6481	131.349	61.1152	5		93.468	17.2961	7.73506	114.944	71.992	5
24.17	94.434	27.4536	12.2776	128.522	60.3459	5		89.008	24.6897	11.0416	119.664	58.3517	5
24.25	90.454	24.1743	10.8111	120.47	60.4376	5		93.028	18.8533	8.43146	116.437	69.6185	5
24.33	90.698	16.8337	7.52825	111.6	69.7962	5		90.474	15.9124	7.11626	110.232	70.7161	5
24.42	90.122	23.1657	10.36	118.886	61.358	5		86.428	18.8275	8.41993	109.805	63.0505	5
24.5	94.032	23.1318	10.3448	122.754	65.3101	5		93.364	24.6935	11.0433	124.025	62.703	5
24.58	90.186	16.0053	7.15777	110.059	70.3128	5		94.83	7.10071	3.17554	103.647	86.0133	5
24.67	92.612	18.1396	8.11227	115.135	70.0887	5		103.846	19.8538	8.8789	128.498	79.1942	5
24.75	95.978	15.5074	6.93513	115.233	76.723	5		97.66	12.5969	5.63349	113.301	82.0189	5
24.83	90.394	8.05295	3.60139	100.393	80.3949	5		99.784	23.0156	10.2929	128.362	71.2063	5
24.92	91.598	6.49101	2.90287	99.6577	83.5383	5		101.524	23.1445	10.3505	130.262	72.7863	5
25	94.042	10.8966	4.8731	107.572	80.5121	5		100.718	16.5915	7.41994	121.319	80.117	5
25.08	102.14	14.6834	6.56661	120.372	83.9082	5		104.004	21.1684	9.46681	130.288	77.7199	5
25.17	100.098	15.1509	6.7757	118.91	81.2856	5		93.116	20.1487	9.01078	118.134	68.0981	5
25.25	102.726	19.8428	8.87399	127.364	78.0879	5		105.946	10.8919	4.87099	119.47	92.422	5
25.33	103.064	15.9658	7.14014	122.888	83.2398	5		115.918	8.60578	3.84862	126.603	105.233	5
25.42	106.684	14.841	6.6371	125.112	88.2565	5		112.074	16.1797	7.2358	132.164	91.9842	5
25.5	107.666	18.5623	8.3013	130.714	84.6179	5		122.508	19.1768	8.57612	146.319	98.6969	5
25.58	108.604	14.2024	6.35152	126.239	90.9694	5		118.466	15.6621	7.00432	137.913	99.0189	5
25.67	103.62	11.1253	4.9754	117.434	89.8061	5		107.87	14.1802	6.34159	125.477	90.2629	5
25.75	107.6	20.3779	9.11325	132.902	82.2976	5		105.946	17.3541	7.76097	127.494	84.3981	5
25.83	105.632	14.0247	6.27202	123.046	88.2181	5		107.85	12.6545	5.65928	123.563	92.1373	5
25.92	104.094	18.296	8.18221	126.811	81.3765	5		112.044	17.7842	7.95332	134.126	89.962	5
26	103.348	11.2295	5.02197	117.291	89.4048	5		113.672	19.394	8.67327	137.753	89.5911	5
26.08	104.436	15.63	6.98995	123.843	85.0288	5		106.076	14.8473	6.63991	124.511	87.6407	5
26.17	101.552	15.1698	6.78415	120.388	82.7162	5		110.584	15.215	6.80437	129.476	91.692	5
26.25	106.982	15.1204	6.76205	125.756	88.2075	5		112.928	11.5982	5.18687	127.329	98.5269	5
26.33	109.06	14.8743	6.65199	127.529	90.5911	5		111.692	15.1033	6.75439	130.445	92.9388	5
26.42	106.044	17.6395	7.88863	127.946	84.1416	5		107.492	19.3863	8.6698	131.563	83.4208	5
26.5	105.496	15.0002	6.70828	124.121	86.8708	5		104.838	13.8689	6.20236	122.059	87.6175	5
26.58	100.316	17.6394	7.88859	122.218	78.4138	5		101.188	12.3505	5.5233	116.523	85.8529	5
26.67	96.134	20.4186	9.13145	121.487	70.781	5		104.84	13.8931	6.21317	122.091	87.5895	5
26.75	99.748	25.8746	11.5715	131.876	67.6205	5		108.892	18.9781	8.48727	132.456	85.3276	5
26.83	100.708	15.4824	6.92395	119.932	81.484	5		105.458	14.7115	6.57918	123.725	87.1913	5
26.92	98.928	22.5284	10.075	126.901	70.9553	5		108.65	17.9775	8.03977	130.972	86.328	5
27	97.638	16.9663	7.58757	118.704	76.5715	5		107.002	29.4461	13.1687	143.564	70.4398	5
27.08	100.48	17.3541	7.761	122.028	78.932	5		100.788	21.8277	9.76165	127.891	73.6853	5
27.17	98.088	13.4813	6.02904	114.827	81.3487	5		104.564	21.2119	9.48625	130.902	78.226	5
27.25	106.438	21.6542	9.68404	133.325	79.5508	5		108.292	20.2846	9.07153	133.479	83.1054	5
27.33	100.134	17.1199	7.65624	121.391	78.8769	5		103.69	16.1108	7.20496	123.694	83.6858	5
27.42	90.894	9.69458	4.33555	102.931	78.8566	5		99.976	13.6183	6.09028	116.885	83.0667	5
27.5	94.318	15.7155	7.0282	113.831	74.8046	5		97.9	27.5495	12.3205	132.107	63.6928	5
27.58	102.56	24.2827	10.8596	132.711	72.409	5		103.456	16.5259	7.3906	123.976	82.9364	5
27.67	100.032	23.3762	10.4542	129.057	71.0066	5		110.772	9.63309	4.30805	122.733	98.8109	5
27.75	96.628	18.6723	8.35051	119.813	73.4433	5		104.602	20.0562	8.96942	129.505	79.6989	5
27.83	95.994	15.3912	6.88316	115.105	76.8833	5		101.042	20.0705	8.97578	125.963	76.1212	5
27.92	102.984	17.1124	7.65289	124.232	81.7362	5		109.716	17.4957	7.82429	131.44	87.9923	5
28	100.51	17.4588	7.80781	122.188	78.8321	5		109.674	5.82809	2.6064	116.911	102.437	5
28.08	106.234	17.2262	7.7038	127.623	84.8448	5		116.482	12.7709	5.7113	132.339	100.625	5
28.17	104.602	14.1461	6.32632	122.167	87.0373	5		120.134	13.833	6.18631	137.31	102.958	5
28.25	103.132	12.6871	5.67386	118.885	87.3788	5		116.4	10.0851	4.5102	128.922	103.878	5
28.33	107.752	15.3099	6.84679	126.762	88.7423	5		114.854	8.79802	3.93459	125.778	103.93	5
28.42	103.978	11.5901	5.18326	118.369	89.5869	5		118.182	17.319	7.74528	139.686	96.6776	5
28.5	109.914	9.3575	4.1848	121.533	98.2951	5		114.538	19.8072	8.85805	139.132	89.9441	5
28.58	109.922	13.3263	5.95971	126.469	93.3752	5		108.588	13.2652	5.93236	125.059	92.1171	5
28.67	101.494	13.0937	5.85569	117.752	85.236	5		112.444	10.3833	4.64354	125.337	99.5515	5
28.75	102.34	17.5602	7.85316	124.144	80.5361	5		108.816	17.2065	7.69499	130.181	87.4513	5
28.83	100.982	13.0559	5.83876	117.193	84.771	5		110.774	21.2979	9.52472	137.219	84.3291	5
28.92	101.812	12.2462	5.47667	117.018	86.6063	5		103.142	11.8224	5.28714	117.821	88.4626	5
29	101.322	14.629	6.5423	119.486	83.1576	5		101.854	10.8307	4.84363	115.302	88.4059	5
29.08	102.922	13.3931	5.98957	119.552	86.2923	5		111.038	15.1607	6.78006	129.862	92.2135	5
29.17	101.268	13.2191	5.91177	117.682	84.8543	5		109.95	25.2255	11.2812	141.272	78.6284	5
29.25	99.968	12.6	5.63487	115.613	84.3231	5		102.634	15.026	6.71984	121.291	83.9767	5
29.33	103.438	18.4228	8.23892	126.313	80.5631	5		103.056	14.9184	6.67169	121.58	84.5324	5
29.42	103.382	21.774	9.73762	130.418	76.346	5		97.214	8.86622	3.96509	108.223	86.2051	5
29.5	99.914	16.5148	7.38565	120.42	79.4082	5		89.354	15.4578	6.91294	108.547	70.1606	5
29.58	105.118	14.2705	6.38196	122.837	87.3988	5		99.836	17.9791	8.04048	122.16	77.512	5
29.67	102.646	16.3747	7.32301	122.978	82.3141	5		101.004	21.6764	9.69399	127.919	74.0892	5
29.75	98.038	11.839	5.29454	112.738	83.338	5		107.162	17.9115	8.01029	129.402	84.9219	5
29.83	99.816	14.6611	6.55665	118.02	81.6118	5		104.322	26.9531	12.0538	137.789	70.8553	5
29.92	100.262	12.0236	5.37711	115.191	85.3327	5		113.63	36.0813	16.136	158.431	68.8292	5
30	109.874	14.9709	6.69517	128.463	91.2852	5		115.032	23.8867	10.6825	144.691	85.3727	5
30.08	97.236	10.2512	4.58446	109.965	84.5075	5		109.414	16.6078	7.42726	130.035	88.7926	5
30.17	104.986	12.9337	5.78412	121.045	88.9267	5		109.944	14.2704	6.38193	127.663	92.2249	5
30.25	109.68	7.71018	3.4481	119.253	100.107	5		108.47	10.841	4.84825	121.931	95.0091	5
30.33	102.506	10.6198	4.74933	115.692	89.3198	5		112.1	10.1593	4.54336	124.714	99.4856	5
30.42	102.482	10.7631	4.81341	115.846	89.1178	5		122.742	11.2672	5.03887	136.732	108.752	5
30.5	104.93	15.1113	6.75799	123.693	86.1668	5		112.958	18.3097	8.18834	135.692	90.2235	5
30.58	106.228	22.3186	9.98118	133.94	78.5158	5		109.172	16.3034	7.29109	129.415	88.9287	5
30.67	98.266	21.0086	9.39532	124.352	72.1804	5		110.134	20.8291	9.31505	135.997	84.2713	5
30.75	100.548	19.2925	8.62788	124.503	76.5932	5		112.05	15.365	6.87145	131.128	92.9718	5
30.83	100.678	19.9204	8.90867	125.412	75.9436	5		107.79	21.9864	9.8326	135.09	80.4903	5
30.92	101.394	14.7117	6.57926	119.661	83.127	5		111.116	27.9095	12.4815	145.77	76.4617	5
31	103.116	18.4487	8.25049	126.023	80.209	5		105.19	26.8538	12.0094	138.533	71.8466	5
31.08	105.448	17.3607	7.76393	127.004	83.8919	5		105.282	24.1344	10.7932	135.249	75.3151	5
31.17	101.334	16.8301	7.52664	122.231	80.4367	5		108.122	28.7535	12.859	143.824	72.4198	5
31.25	93.858	18.4422	8.24758	116.757	70.959	5		106.252	22.9274	10.2534	134.72	77.7839	5
31.33	96.2	18.9901	8.49265	119.779	72.6206	5		101.952	25.3609	11.3417	133.442	70.4623	5
31.42	98.372	12.6324	5.64939	114.057	82.6868	5		97.598	18.0148	8.05646	119.966	75.2297	5
31.5	102.284	17.3216	7.74645	123.792	80.7764	5		91.77	22.4629	10.0457	119.661	63.8786	5
31.58	103.916	9.66617	4.32284	115.918	91.9139	5		103.928	23.5458	10.53	133.164	74.6921	5
31.67	102.242	16.0828	7.19246	122.211	82.2725	5		101.2	25.5155	11.4109	132.882	69.5183	5
31.75	104.872	16.5338	7.39416	125.401	84.3425	5		103.36	21.8997	9.79382	130.552	76.168	5
31.83	102.422	17.7459	7.93619	124.456	80.3876	5		93.872	11.2375	5.02555	107.825	79.9188	5
31.92	96.622	9.36578	4.18851	108.251	84.9928	5		92.808	14.615	6.53604	110.955	74.6611	5
32	94.442	7.57355	3.38699	103.846	85.0382	5		108.586	21.0969	9.43481	134.781	82.3908	5
32.08	89.79	2.34225	1.04749	92.6983	86.8817	5		105.728	26.0316	11.6417	138.05	73.4055	5
32.17	96.176	10.1058	4.51947	108.724	83.6279	5		115.764	23.8091	10.6478	145.327	86.2011	5
32.25	96.146	15.1014	6.75357	114.897	77.3951	5		116.1	24.6241	11.0122	146.675	85.5251	5
32.33	102.886	12.6244	5.64582	118.561	87.2107	5		113.602	16.9949	7.60033	134.704	92.5001	5
32.42	103.05	21.0071	9.39467	129.134	76.9662	5		106.846	12.6566	5.66022	122.561	91.1307	5
32.5	98.944	20.2563	9.0589	124.096	73.7925	5		102.974	16.333	7.30434	123.254	82.6939	5
32.58	100.822	18.0809	8.08601	123.272	78.3716	5		105.686	18.4176	8.2366	128.554	82.8175	5
32.67	103.148	13.0719	5.84593	119.379	86.9171	5		108.336	22.6695	10.1381	136.484	80.1881	5
32.75	104.428	23.0105	10.2906	132.999	75.8567	5		105.624	10.3099	4.61072	118.425	92.8226	5
32.83	99.902	14.0375	6.27776	117.332	82.4721	5		102.416	10.8014	4.83054	115.828	89.0043	5
32.92	99.33	17.7144	7.92211	121.325	77.3347	5		102.192	11.3095	5.05774	116.235	88.1495	5
33	98.5	9.63263	4.30784	110.46	86.5395	5		110.052	20.8258	9.31359	135.911	84.1933	5
33.08	101.498	3.90914	1.74822	106.352	96.6442	5		102.754	10.9856	4.9129	116.394	89.1136	5
33.17	106.684	15.6172	6.98422	126.075	87.2927	5		99.376	12.7351	5.69533	115.189	83.5632	5
33.25	101.2	12.9965	5.81223	117.337	85.0627	5		90.656	14.3949	6.43758	108.53	72.7824	5
33.33	100.84	17.5608	7.85344	122.645	79.0354	5		105.54	10.8895	4.86991	119.061	92.019	5
33.42	95.99	9.01686	4.03246	107.186	84.7941	5		104.556	14.4241	6.45066	122.466	86.6461	5
33.5	96.99	11.2842	5.04647	111.001	82.9788	5		97.85	11.0458	4.93982	111.565	84.1349	5
33.58	103.626	15.2634	6.82602	122.578	84.6739	5		112.308	12.9361	5.7852	128.37	96.2457	5
33.67	104.658	14.0455	6.28134	122.098	87.2182	5		109.106	18.7297	8.37619	132.362	85.85	5
33.75	100.778	12.0855	5.40479	115.784	85.7719	5		109.334	14.7961	6.617	127.706	90.9623	5
33.83	97.81	19.5665	8.75039	122.105	73.515	5		117.844	17.565	7.85533	139.654	96.0341	5
33.92	101.568	14.6349	6.54492	119.74	83.3964	5		111.09	21.8567	9.77461	138.229	83.9513	5
34	105.566	14.2911	6.39117	123.311	87.8213	5		114.396	22.2973	9.97168	142.082	86.7102	5
34.08	98.406	13.1572	5.8841	114.743	82.0691	5		108.34	16.6453	7.44399	129.008	87.6722	5
34.17	103.988	13.4235	6.00316	120.655	87.3206	5		110.744	14.9218	6.67322	129.272	92.2162	5
34.25	106.638	14.0032	6.26242	124.025	89.2507	5		108.578	16.6868	7.46256	129.297	87.8586	5
34.33	111.108	16.1661	7.2297	131.181	91.0351	5		99.474	8.82598	3.9471	110.433	88.5151	5
34.42	103.146	13.9652	6.24545	120.486	85.8059	5		107.034	9.09264	4.06635	118.324	95.744	5
34.5	101.93	11.5226	5.15305	116.237	87.6228	5		113.076	16.3191	7.29813	133.339	92.8131	5
34.58	100.39	16.7566	7.49377	121.196	79.584	5		110.058	12.9696	5.8002	126.162	93.9541	5
34.67	104.732	15.6317	6.99069	124.141	85.3227	5		110.366	8.9177	3.98812	121.439	99.2932	5
34.75	98.246	14.4504	6.46241	116.189	80.3035	5		111.27	10.6234	4.75094	124.461	98.0793	5
34.83	104.058	17.2768	7.72641	125.51	82.606	5		112.02	17.6686	7.90165	133.959	90.0815	5
34.92	97.606	12.3233	5.51113	112.907	82.3046	5		90.854	17.8718	7.9925	113.045	68.6633	5
35	101.842	10.7911	4.82593	115.241	88.4431	5		100.24	9.38448	4.19687	111.892	88.5876	5
35.08	106.466	25.0183	11.1885	137.53	75.4017	5		105.208	20.6451	9.23278	130.842	79.5737	5
35.17	104.976	18.1898	8.13473	127.562	82.3904	5		103.862	11.9316	5.33597	118.677	89.047	5
35.25	101.168	11.6603	5.21465	115.646	86.6898	5		109.554	12.584	5.62773	125.179	93.9289	5
35.33	103.278	11.8232	5.28748	117.958	88.5976	5		104.688	10.0811	4.50842	117.205	92.1706	5
35.42	102.18	13.6175	6.08995	119.088	85.2716	5		110.786	13.8095	6.17577	127.933	93.6393	5
35.5	106.072	11.883	5.31424	120.827	91.3173	5		108.84	15.6206	6.98574	128.236	89.4445	5
35.58	106.434	8.60811	3.84967	117.122	95.7456	5		112.37	24.4807	10.9481	142.767	81.9732	5
35.67	105.478	8.74121	3.90919	116.332	94.6243	5		109.47	14.8036	6.62037	127.851	91.0889	5
35.75	101.048	11.038	4.93632	114.753	87.3426	5		108.722	9.27313	4.14707	120.236	97.2079	5
35.83	103.83	11.3158	5.0606	117.88	89.7795	5		116.336	19.0845	8.53485	140.033	92.6394	5
35.92	102.682	12.1786	5.44645	117.804	87.5602	5		112.114	16.9946	7.60021	133.216	91.0124	5
36	102.712	15.7424	7.0402	122.259	83.1653	5		104.464	15.4209	6.89644	123.612	85.3164	5
36.08	109.38	12.3386	5.518	124.7	94.0596	5		108.15	19.5628	8.74877	132.44	83.8595	5
36.17	98.206	13.3954	5.99059	114.839	81.5735	5		102.99	22.5707	10.0939	131.015	74.9648	5
36.25	100.76	17.7508	7.93841	122.801	78.7194	5		110.744	21.9728	9.82654	138.027	83.4611	5
36.33	107.634	14.9105	6.66818	126.148	89.1202	5		102.968	21.6758	9.6937	129.882	76.054	5
36.42	102.828	9.29533	4.157	114.37	91.2863	5		113	22.827	10.2085	141.343	84.6566	5
36.5	96.294	10.4143	4.6574	109.225	83.363	5		111.618	10.7384	4.80235	124.951	98.2845	5
36.58	100.594	11.8684	5.30771	115.331	85.8574	5		106.138	15.7894	7.06124	125.743	86.5328	5
36.67	97.624	11.6142	5.19402	112.045	83.2031	5		109.176	20.6542	9.23682	134.822	83.5305	5
36.75	102.664	3.09849	1.38569	106.511	98.8167	5		109.202	25.9178	11.5908	141.383	77.0208	5
36.83	93.892	5.68605	2.54288	100.952	86.8318	5		108.36	18.8083	8.41132	131.714	85.0064	5
36.92	90.134	12.0652	5.39571	105.115	75.1531	5		100.7	18.0474	8.07105	123.109	78.2912	5
37	89.912	12.8263	5.7361	105.838	73.986	5		102.06	22.4435	10.037	129.927	74.1928	5
37.08	88.034	16.2711	7.27667	108.237	67.8307	5		99.44	28.3827	12.6931	134.682	64.1983	5
37.17	95.45	19.9258	8.91108	120.191	70.7089	5		99.588	17.1055	7.6498	120.827	78.3488	5
37.25	91.528	17.978	8.04002	113.851	69.2053	5		104.216	14.1915	6.34662	121.837	86.595	5
37.33	92.574	10.2794	4.59707	105.338	79.8105	5		97.916	18.8322	8.422	121.299	74.5328	5
37.42	92.95	9.48962	4.24389	104.733	81.1671	5		94.278	17.3064	7.73964	115.767	72.7893	5
37.5	86.084	8.85755	3.96122	97.0821	75.0859	5		97.042	24.8006	11.0912	127.836	66.248	5
37.58	88.684	8.36715	3.7419	99.0732	78.2948	5		96.752	9.85601	4.40774	108.99	84.5142	5
37.67	86.668	6.79461	3.03864	95.1046	78.2314	5		92.912	8.32833	3.72454	103.253	82.571	5
37.75	88.252	5.76948	2.58019	95.4158	81.0882	5		84.514	6.43055	2.87583	92.4986	76.5294	5
37.83	83.978	9.06827	4.05545	95.2377	72.7183	5		86.818	12.866	5.75386	102.793	70.8427	5
37.92	84.8	13.3213	5.95747	101.341	68.2594	5		79.93	6.83799	3.05804	88.4205	71.4395	5
38	82.656	11.3234	5.06397	96.7158	68.5962	5		77.836	9.1899	4.10985	89.2468	66.4252	5
38.08	85.798	10.823	4.84018	99.2365	72.3595	5		76.586	9.88737	4.42177	88.8628	64.3092	5
38.17	89.012	22.1029	9.88474	116.456	61.5676	5		81.992	12.9477	5.79039	98.0687	65.9153	5
38.25	87.94	10.4093	4.6552	100.865	75.0151	5		96.75	12.821	5.73372	112.669	80.8306	5
38.33	82.26	12.9289	5.78196	98.3133	66.2067	5		84.624	4.694	2.09922	90.4524	78.7956	5
38.42	85.408	9.92956	4.44063	97.7372	73.0788	5		85.658	5.028	2.24859	91.9011	79.4149	5
38.5	86.574	12.9652	5.7982	102.672	70.4756	5		86.646	18.9414	8.47086	110.165	63.1271	5
38.58	85.998	14.1765	6.33992	103.6	68.3956	5		83.01	14.4067	6.44287	100.898	65.1217	5
38.67	90.284	14.857	6.64426	108.731	71.8366	5		82.716	10.7583	4.81125	96.0742	69.3578	5
38.75	85.708	14.7753	6.60772	104.054	67.362	5		83.656	8.0905	3.61818	93.7017	73.6103	5
38.83	91.86	17.1728	7.67989	113.183	70.5372	5		88.808	12.0661	5.39614	103.79	73.8259	5
38.92	80.038	17.8629	7.98854	102.218	57.8583	5		87.674	10.0096	4.47642	100.103	75.2455	5
39	82.04	16.7201	7.47747	102.801	61.2792	5		91.482	6.46883	2.89295	99.5141	83.4499	5
39.08	86.73	13.6473	6.10325	103.675	69.7847	5		86.752	9.62094	4.30262	98.698	74.806	5
39.17	91.306	18.2477	8.16061	113.963	68.6485	5		84.89	3.67003	1.64129	89.4469	80.3331	5
39.25	90.776	20.2294	9.04688	115.894	65.6578	5		82.76	6.6162	2.95885	90.9751	74.5449	5
39.33	89.422	22.2072	9.93138	116.996	61.8481	5		85.84	16.0904	7.19583	105.819	65.8612	5
39.42	93.118	14.5624	6.51249	111.2	75.0364	5		93.008	11.2094	5.013	106.926	79.0897	5
39.5	87.742	16.4234	7.34477	108.134	67.3496	5		92.17	14.9289	6.67639	110.707	73.6334	5
39.58	94.228	18.147	8.11557	116.76	71.6956	5		95.464	24.9754	11.1693	126.475	64.453	5
39.67	84.132	13.2987	5.94737	100.645	67.6194	5		93.854	15.8364	7.08227	113.518	74.1905	5
39.75	95.056	25.1171	11.2327	126.243	63.8691	5		93.068	9.62991	4.30663	105.025	81.1109	5
39.83	82.184	10.8539	4.85403	95.6609	68.7071	5		93.874	5.32627	2.38198	100.487	87.2606	5
39.92	75.48	8.35383	3.73594	85.8526	65.1074	5		91.39	14.9888	6.7032	110.001	72.7789	5
40	78.548	13.6593	6.10863	95.5083	61.5877	5		98.058	21.8116	9.75443	125.141	70.9754	5
40.08	76.206	9.64023	4.31124	88.1759	64.2361	5		89.014	13.7996	6.17139	106.149	71.8795	5
40.17	79.05	11.2829	5.04588	93.0596	65.0404	5		86.29	7.23067	3.23365	95.2681	77.3119	5
40.25	78.712	11.1808	5.00022	92.5948	64.8292	5		80.748	9.24181	4.13306	92.2232	69.2728	5
40.33	77.102	14.7616	6.60158	95.4309	58.7731	5		81.18	11.8688	5.30788	95.917	66.443	5
40.42	81.138	14.2173	6.35819	98.7912	63.4848	5		81.73	8.34444	3.73174	92.091	71.369	5
40.5	88.652	18.1086	8.0984	111.137	66.1672	5		80.588	8.02541	3.58907	90.5529	70.6231	5
40.58	80.998	10.6491	4.76243	94.2206	67.7754	5		85.562	9.34959	4.18126	97.171	73.953	5
40.67	77.298	15.058	6.73413	95.995	58.601	5		83.23	14.016	6.26815	100.633	65.8268	5
40.75	82.556	13.0702	5.84516	98.7848	66.3272	5		86.574	14.9099	6.66793	105.087	68.0609	5
40.83	77.258	11.7209	5.24173	91.8114	62.7046	5		82.222	6.51077	2.91171	90.3062	74.1378	5
40.92	72.666	9.7373	4.35465	84.7564	60.5756	5		80.15	8.59373	3.84323	90.8205	69.4795	5
41	73.406	14.581	6.52083	91.5107	55.3013	5		78.622	7.7923	3.48482	88.2974	68.9466	5
41.08	84.858	24.4378	10.9289	115.201	54.5145	5		78.56	4.07405	1.82197	83.6186	73.5014	5
41.17	82.812	19.9084	8.90329	107.532	58.0925	5		86.108	12.7596	5.70628	101.951	70.2648	5
41.25	81.108	20.7629	9.28544	106.889	55.3275	5		81.99	16.218	7.25292	102.127	61.8527	5
41.33	81.91	25.377	11.3489	113.42	50.4003	5		82.672	11.5591	5.16941	97.0246	68.3194	5
41.42	79.066	21.5399	9.63292	105.811	52.3207	5		77.77	9.6688	4.32402	89.7754	65.7646	5
41.5	73.338	8.94242	3.99917	84.4415	62.2345	5		84.624	13.7841	6.16443	101.739	67.5088	5
41.58	77.776	10.6887	4.78014	91.0478	64.5042	5		83.39	15.7527	7.04484	102.95	63.8304	5
41.67	74.082	13.9742	6.24944	91.4332	56.7308	5		87.33	19.8609	8.88207	111.991	62.6694	5
41.75	79.226	9.96727	4.4575	91.602	66.85	5		83.85	16.033	7.17015	103.758	63.9425	5
41.83	80.19	10.7172	4.79288	93.4972	66.8828	5		96.178	19.7703	8.84153	120.726	71.63	5
41.92	85.892	22.6759	10.1409	114.048	57.7362	5		93.59	13.1903	5.89886	109.968	77.2121	5
42	85.944	25.5892	11.4438	117.717	54.1709	5		94.704	22.3886	10.0125	122.503	66.9049	5
42.08	96.042	10.6798	4.77616	109.303	82.7812	5		90.01	15.6007	6.97684	109.381	70.6392	5
42.17	92.376	15.4341	6.90232	111.54	73.2121	5		84.378	13.4496	6.01486	101.078	67.6781	5
42.25	86.692	10.6505	4.76304	99.9163	73.4677	5		81.506	14.3693	6.42613	99.3478	63.6642	5
42.33	82.86	14.8699	6.65004	101.323	64.3965	5		80.848	8.66937	3.87706	91.6124	70.0836	5
42.42	78.248	12.22	5.46494	93.4211	63.0749	5		85.286	6.79698	3.0397	93.7256	76.8464	5
42.5	82.534	9.56309	4.27674	94.4081	70.6599	5		85.626	11.0494	4.94143	99.3456	71.9064	5
42.58	77.322	8.72726	3.90295	88.1583	66.4857	5		80.772	9.18069	4.10573	92.1713	69.3727	5
42.67	72.4	15.0546	6.73262	91.0928	53.7072	5		88.872	13.7562	6.15195	105.953	71.7914	5
42.75	73.494	5.8118	2.59912	80.7103	66.2777	5		81.754	9.51307	4.25437	93.566	69.942	5
42.83	69.082	7.94133	3.55147	78.9425	59.2215	5		79.116	13.2124	5.90875	95.5213	62.7107	5
42.92	77.12	15.993	7.1523	96.978	57.262	5		86.148	12.9187	5.7774	102.189	70.1074	5
43	76.85	26.8952	12.0279	110.245	43.4552	5		80.306	14.451	6.46269	98.2493	62.3627	5
43.08	76.062	16.0195	7.16414	95.9529	56.1711	5		90.722	34.0501	15.2277	133.001	48.4432	5
43.17	83.284	24.4453	10.9323	113.637	52.9312	5		87.228	17.6306	7.88465	109.119	65.3367	5
43.25	84.582	17.4975	7.82513	106.308	62.8559	5		87.076	21.5922	9.65633	113.886	60.2657	5
43.33	80.138	15.2737	6.83061	99.1028	61.1732	5		81.86	11.5721	5.17519	96.2286	67.4914	5
43.42	72.778	8.13851	3.63965	82.8833	62.6727	5		80.7	10.1135	4.52288	93.2575	68.1425	5
43.5	75.466	15.7719	7.05339	95.0494	55.8826	5		84.334	6.35232	2.84085	92.2215	76.4465	5
43.58	74.184	8.81666	3.94293	85.1313	63.2367	5		84.13	6.9115	3.09092	92.7118	75.5482	5
43.67	78.328	8.36447	3.74071	88.7139	67.9421	5		103.658	12.7415	5.69815	119.479	87.8374	5
43.75	78.932	8.69159	3.887	89.724	68.14	5		89.712	10.5952	4.73832	102.868	76.5563	5
43.83	78.86	17.3226	7.74691	100.369	57.3511	5		96.336	19.7467	8.83101	120.855	71.8172	5
43.92	75.77	10.0782	4.50712	88.2838	63.2562	5		101.226	22.0263	9.85044	128.575	73.8768	5
44	75.172	12.284	5.49357	90.4246	59.9194	5		91.616	14.7964	6.61717	109.988	73.2438	5
44.08	77.39	16.2632	7.27314	97.5835	57.1965	5		96.826	29.3709	13.1351	133.295	60.3572	5
44.17	74.888	13.7569	6.1523	91.9695	57.8065	5		90.022	17.2288	7.70498	111.414	68.6296	5
44.25	80.588	13.8333	6.18645	97.7643	63.4117	5		98.954	15.2436	6.81715	117.881	80.0266	5
44.33	80.626	15.5303	6.94537	99.9094	61.3426	5		93.356	10.734	4.8004	106.684	80.028	5
44.42	83.068	21.2108	9.48574	109.405	56.7314	5		98.706	14.6981	6.57318	116.956	80.4559	5
44.5	82.572	15.5214	6.94137	101.844	63.2997	5		90.308	12.7599	5.70641	106.152	74.4645	5
44.58	83.798	17.3791	7.77215	105.377	62.219	5		88.732	18.8305	8.42126	112.113	65.3508	5
44.67	84.526	20.3267	9.09038	109.765	59.2871	5		92.292	19.9287	8.9124	117.037	67.5472	5
44.75	89.774	24.9039	11.1373	120.696	58.8518	5		86.524	14.4159	6.447	104.424	68.6243	5
44.83	88.284	21.3296	9.53889	114.768	61.7998	5		80.816	4.84731	2.16778	86.8347	74.7973	5
44.92	86.2	22.951	10.264	114.697	57.7025	5		83.482	6.44178	2.88085	91.4805	75.4835	5
45	79.92	14.962	6.69121	98.4978	61.3422	5		83.816	11.0313	4.93333	97.5131	70.1189	5
45.08	75.948	13.9581	6.24224	93.2792	58.6168	5		92.616	15.7156	7.02824	112.13	73.1025	5
45.17	82.432	11.7058	5.23498	96.9666	67.8974	5		85.528	19.64	8.78326	109.914	61.1418	5
45.25	83.856	10.3622	4.63413	96.7224	70.9896	5		87.66	17.3001	7.73682	109.141	66.1791	5
45.33	86.606	15.815	7.07268	106.243	66.9691	5		87.752	13.1698	5.88969	104.104	71.3996	5
45.42	93.258	13.0725	5.84621	109.49	77.0263	5		82.208	4.93304	2.20612	88.3332	76.0828	5
45.5	86.53	15.3693	6.87334	105.613	67.4466	5		83.144	10.1938	4.55879	95.8012	70.4868	5
45.58	78.342	8.38338	3.74916	88.7513	67.9327	5		79.682	8.90576	3.98278	90.74	68.624	5
45.67	77.178	9.24534	4.13464	88.6576	65.6984	5		81.796	10.0544	4.49645	94.2802	69.3118	5
45.75	83.034	14.183	6.34283	100.645	65.4235	5		84.54	10.9843	4.91234	98.1788	70.9012	5
45.83	83.04	12.589	5.62997	98.6713	67.4087	5		79.32	6.15942	2.75458	86.9679	71.6721	5
45.92	81.306	14.4354	6.45571	99.2299	63.3821	5		88.34	15.6661	7.0061	107.792	68.8879	5
46	79.33	11.3793	5.08896	93.4592	65.2008	5		86.434	9.50454	4.25056	98.2354	74.6326	5
46.08	81.502	19.4857	8.71427	105.697	57.3073	5		92.464	12.6153	5.64174	108.128	76.8	5
46.17	83.932	23.5141	10.5158	113.129	54.7354	5		101.234	16.1711	7.23193	121.313	81.1549	5
46.25	88.324	21.4278	9.58281	114.93	61.7179	5		102.064	11.4658	5.12765	116.301	87.8274	5
46.33	88.882	18.614	8.32444	111.994	65.7697	5		101.638	12.9991	5.81339	117.779	85.4974	5
46.42	77.672	15.1786	6.78808	96.5187	58.8253	5		98.512	18.0261	8.0615	120.894	76.1297	5
46.5	78.738	9.538	4.26552	90.581	66.895	5		91.294	15.284	6.8352	110.272	72.3164	5
46.58	79.21	18.3895	8.22405	102.044	56.3764	5		89.278	8.2487	3.68893	99.5201	79.0359	5
46.67	83.696	20.6585	9.23878	109.347	58.045	5		91.684	8.08922	3.61761	101.728	81.6399	5
46.75	80.522	16.2784	7.27993	100.734	60.3097	5		83.142	3.81539	1.70629	87.8794	78.4046	5
46.83	83.378	18.6537	8.34217	106.54	60.2164	5		85.566	9.87459	4.41605	97.8269	73.3051	5
46.92	79.198	13.2456	5.92362	95.6446	62.7514	5		86.94	13.7629	6.15494	104.029	69.8512	5
47	85.358	21.3616	9.55321	111.882	58.834	5		87.836	10.1264	4.52865	100.41	75.2625	5
47.08	86.11	20.9426	9.36581	112.114	60.1063	5		81.424	9.40337	4.20531	93.0998	69.7482	5
47.17	92.926	19.9581	8.92555	117.707	68.1447	5		89.358	17.8959	8.0033	111.579	67.1373	5
47.25	96.33	20.1931	9.03063	121.403	71.257	5		93.428	11.3391	5.07099	107.507	79.3487	5
47.33	94.136	21.1503	9.4587	120.398	67.8744	5		87.132	13.3261	5.95963	103.679	70.5854	5
47.42	92.772	16.0531	7.17914	112.704	72.8395	5		88.238	13.1889	5.89824	104.614	71.8619	5
47.5	93.628	25.0003	11.1805	124.67	62.586	5		89.104	9.63742	4.30998	101.07	77.1376	5
47.58	84.874	10.2452	4.58178	97.595	72.153	5		95.768	13.0319	5.82805	111.949	79.5867	5
47.67	90.44	20.7696	9.28847	116.229	64.6511	5		92.422	16.3547	7.31403	112.729	72.115	5
47.75	85.568	20.7123	9.26283	111.286	59.8503	5		100.732	17.2293	7.70519	122.125	79.339	5
47.83	85.306	19.1374	8.55852	109.068	61.5438	5		93.95	16.0361	7.17156	113.861	74.0386	5
47.92	88.742	22.394	10.0149	116.548	60.9362	5		92.02	14.5179	6.4926	110.046	73.9937	5

## Sheet: Supplementary Figure 1D
			Baseline							+ Tamoxifen						Pulse pressure day	Control	Stim1 smKO + vehicle		Pulse pressure night	Control	Stim1 smKO + vehicle
Time (h)	Mean	SD	SEM	Upper limit	Lower limit	N		Mean	SD	SEM	Upper limit	Lower limit	N			Mouse 1	15.9351	11.1939		Mouse 1	22.2873	19.1392
0	30.116	4.35565	1.94791	35.5243	24.7077	5		28.012	10.1543	4.54114	40.6202	15.4038	5			Mouse 2	25.8437	24.1814		Mouse 2	27.5462	25.2232
0.08	29.9	4.52113	2.02191	35.5137	24.2863	5		28.866	7.39585	3.30752	38.0492	19.6828	5			Mouse 3	26.9033	26.4143		Mouse 3	30.439	29.1153
0.17	26.358	7.02172	3.14021	35.0766	17.6394	5		25.738	6.07975	2.71895	33.287	18.189	5			Mouse 4	33.971	27.7226		Mouse 4	37.7475	34.9854
0.25	26.71	6.65781	2.97747	34.9768	18.4432	5		26.342	8.03628	3.59393	36.3204	16.3636	5			Mouse 5	28.3474	31.6326		Mouse 5	26.8176	31.7901
0.33	30.868	6.24079	2.79097	38.617	23.119	5		23.206	4.47599	2.00172	28.7637	17.6483	5
0.42	29.31	6.44811	2.88368	37.3164	21.3036	5		23.54	4.73653	2.11824	29.4212	17.6588	5		Paired t test				Paired t test
0.5	25.578	7.27747	3.25458	34.6142	16.5418	5		26.018	9.00149	4.02559	37.1948	14.8412	5		P value	0.3037			P value	0.5749
0.58	28.616	5.40679	2.41799	35.3294	21.9026	5		25.344	3.86989	1.73067	30.1491	20.5389	5		Significantly different (P < 0.05)?	No			Significantly different (P < 0.05)?	No
0.67	26.948	5.71391	2.55534	34.0428	19.8532	5		31.008	15.0852	6.74629	49.7387	12.2773	5		One- or two-tailed P value?	Two-tailed			One- or two-tailed P value?	Two-tailed
0.75	27.576	8.83463	3.95097	38.5456	16.6064	5		27.226	6.61365	2.95771	35.4379	19.0141	5
0.83	29.038	10.6113	4.7455	42.2136	15.8624	5		24.6	4.75367	2.1259	30.5025	18.6975	5		Mean of differences (B - A)	-1.971			Mean of differences (B - A)	-0.9169
0.92	29.926	11.337	5.07007	44.0028	15.8492	5		29.006	8.29919	3.71151	39.3108	18.7012	5		SD of differences	3.738			SD of differences	3.362
1	29.058	3.90287	1.74542	33.9041	24.2119	5		24.07	6.64941	2.97371	32.3263	15.8137	5		SEM of differences	1.672			SEM of differences	1.503
1.08	29.124	4.87053	2.17817	35.1716	23.0764	5		29.856	8.39891	3.75611	40.2846	19.4274	5		95% confidence interval	-6.612 to 2.670			95% confidence interval	-5.091 to 3.258
1.17	29.77	6.15654	2.75329	37.4144	22.1256	5		27.92	6.94841	3.10742	36.5476	19.2924	5
1.25	28.974	3.93999	1.76202	33.8661	24.0819	5		30.302	7.40014	3.30944	39.4905	21.1135	5
1.33	28.3	7.07063	3.16208	37.0793	19.5207	5		29.856	6.51866	2.91524	37.95	21.762	5
1.42	28.654	8.19042	3.66287	38.8237	18.4843	5		28.41	7.37156	3.29666	37.563	19.257	5
1.5	29.072	6.93256	3.10033	37.6799	20.4641	5		29.208	6.43215	2.87655	37.1946	21.2214	5
1.58	28.082	8.57986	3.83703	38.7353	17.4287	5		27.476	6.6945	2.99387	35.7883	19.1637	5
1.67	30.95	7.70183	3.44436	40.5131	21.3869	5		25.742	7.58176	3.39067	35.156	16.328	5
1.75	27.636	11.2814	5.04521	41.6437	13.6283	5		28.204	6.34055	2.83558	36.0768	20.3312	5
1.83	29.068	8.35322	3.73567	39.4399	18.6961	5		26.642	4.73258	2.11647	32.5183	20.7657	5
1.92	28.89	5.01784	2.24405	35.1205	22.6595	5		28.134	6.1753	2.76168	35.8016	20.4664	5
2	28.744	6.93354	3.10077	37.3531	20.1349	5		26.974	5.82452	2.6048	34.2061	19.7419	5
2.08	28.024	7.71981	3.45241	37.6094	18.4386	5		28.396	6.82325	3.05145	36.8682	19.9238	5
2.17	27.936	6.58651	2.94558	36.1142	19.7578	5		25.212	6.90051	3.086	33.7801	16.6439	5
2.25	28.658	8.50892	3.8053	39.2232	18.0928	5		26.89	5.47483	2.44842	33.6879	20.0921	5
2.33	29.736	7.69322	3.44051	39.2884	20.1836	5		25.342	5.76522	2.57828	32.5005	18.1835	5
2.42	26.042	7.53192	3.36838	35.3941	16.6899	5		24.114	5.53453	2.47512	30.986	17.242	5
2.5	27.948	8.8473	3.95663	38.9334	16.9626	5		27.804	3.15093	1.40914	31.7164	23.8916	5
2.58	27.854	6.11126	2.73304	35.4421	20.2659	5		27.81	5.24377	2.34509	34.321	21.299	5
2.67	27.444	5.01634	2.24338	33.6726	21.2154	5		29.582	5.94166	2.65719	36.9595	22.2045	5
2.75	26.982	5.11339	2.28678	33.3311	20.6329	5		24.03	5.39587	2.41311	30.7299	17.3301	5
2.83	28.042	2.3354	1.04442	30.9418	25.1422	5		27.506	8.18879	3.66214	37.6737	17.3383	5
2.92	29.202	2.96769	1.32719	32.8869	25.5171	5		29.82	8.86517	3.96462	40.8276	18.8124	5
3	28.07	3.58406	1.60284	32.5202	23.6198	5		24.4	6.41676	2.86966	32.3675	16.4325	5
3.08	25.624	5.04361	2.25557	31.8865	19.3615	5		25.424	9.45988	4.23059	37.17	13.678	5
3.17	27.682	6.7793	3.0318	36.0996	19.2644	5		27.686	13.853	6.19527	44.8868	10.4852	5
3.25	27.61	7.3077	3.2681	36.6837	18.5363	5		28.1	8.87283	3.96805	39.1171	17.0829	5
3.33	26.674	6.34668	2.83832	34.5544	18.7936	5		29.94	13.1366	5.87484	46.2512	13.6288	5
3.42	29.37	2.51003	1.12252	32.4866	26.2534	5		26.542	4.28924	1.91821	31.8678	21.2162	5
3.5	30.512	9.76114	4.36531	42.6321	18.3919	5		28.236	10.9238	4.88528	41.7997	14.6723	5
3.58	29.6	5.49041	2.45539	36.4172	22.7828	5		30.244	8.64206	3.86485	40.9745	19.5135	5
3.67	30.956	8.34062	3.73004	41.3122	20.5998	5		30.014	8.5862	3.83986	40.6752	19.3528	5
3.75	29.066	8.20447	3.66915	39.2532	18.8788	5		31.3	11.0576	4.9451	45.0298	17.5702	5
3.83	30.6	7.62515	3.41007	40.0679	21.1321	5		30.458	6.05853	2.70946	37.9807	22.9353	5
3.92	32.7	6.39341	2.85922	40.6385	24.7615	5		26.046	4.23332	1.8932	31.3024	20.7896	5
4	30.518	7.048	3.15196	39.2693	21.7667	5		25.264	4.2998	1.92293	30.6029	19.9251	5
4.08	30.618	10.1299	4.53025	43.196	18.04	5		27.016	3.85514	1.72407	31.8028	22.2292	5
4.17	30.334	6.77995	3.03209	38.7524	21.9156	5		26.146	5.01213	2.24149	32.3694	19.9226	5
4.25	30.336	6.37411	2.85059	38.2505	22.4215	5		25.032	7.06468	3.15942	33.804	16.26	5
4.33	29.262	7.87514	3.52187	39.0403	19.4837	5		26.362	4.27561	1.91211	31.6709	21.0531	5
4.42	29.2	8.13619	3.63862	39.3024	19.0976	5		28.264	8.60461	3.8481	38.948	17.58	5
4.5	30.924	7.68134	3.4352	40.4616	21.3864	5		25.518	8.33387	3.72702	35.8659	15.1701	5
4.58	28.866	7.48473	3.34727	38.1595	19.5725	5		26.448	6.46141	2.88963	34.4709	18.4251	5
4.67	28.23	8.77865	3.92593	39.1301	17.3299	5		26.694	8.9972	4.02367	37.8655	15.5225	5
4.75	28.194	5.20796	2.32907	34.6605	21.7275	5		27.904	9.62668	4.30518	39.8571	15.9509	5
4.83	28.564	6.1208	2.7373	36.164	20.964	5		25.46	5.23044	2.33913	31.9545	18.9655	5
4.92	27.944	6.14549	2.74835	35.5746	20.3134	5		31.462	11.7728	5.26494	46.0798	16.8442	5
5	29.104	4.77314	2.13461	35.0306	23.1774	5		27.262	5.71101	2.55404	34.3532	20.1708	5
5.08	28.096	3.6751	1.64355	32.6592	23.5328	5		29.672	6.68548	2.98984	37.9731	21.3709	5
5.17	29.308	4.95557	2.2162	35.4612	23.1548	5		30.206	8.58285	3.83837	40.863	19.549	5
5.25	30.142	7.18931	3.21516	39.0687	21.2153	5		28.126	10.2826	4.59853	40.8936	15.3584	5
5.33	26.886	9.8036	4.3843	39.0588	14.7132	5		27.758	6.30432	2.81938	35.5858	19.9302	5
5.42	24.12	10.224	4.57229	36.8147	11.4253	5		26.908	5.46807	2.4454	33.6975	20.1185	5
5.5	27.512	6.70198	2.99721	35.8336	19.1904	5		27.212	7.04592	3.15103	35.9607	18.4633	5
5.58	29.502	7.58615	3.39263	38.9214	20.0826	5		25.946	6.21211	2.77814	33.6594	18.2326	5
5.67	33.388	6.04207	2.7021	40.8902	25.8858	5		27.876	7.20404	3.22174	36.821	18.931	5
5.75	30.596	7.69992	3.44351	40.1567	21.0353	5		27.434	8.48223	3.79337	37.9661	16.9019	5
5.83	28.912	7.6464	3.41958	38.4063	19.4177	5		29.454	10.1036	4.51847	41.9993	16.9087	5
5.92	29.128	7.46468	3.33831	38.3966	19.8594	5		26.37	7.17662	3.20948	35.2809	17.4591	5
6	33.5	7.38895	3.30444	42.6746	24.3254	5		29.216	9.4001	4.20385	40.8878	17.5442	5
6.08	29.812	9.3889	4.19884	41.4699	18.1541	5		30.738	11.2888	5.04852	44.7549	16.7211	5
6.17	28.156	8.27114	3.69897	38.426	17.886	5		26.74	5.48642	2.4536	33.5523	19.9277	5
6.25	31.372	8.10266	3.62362	41.4328	21.3112	5		30.93	9.03639	4.0412	42.1502	19.7098	5
6.33	29.004	7.96487	3.562	38.8937	19.1143	5		28.576	5.84126	2.61229	35.8289	21.3231	5
6.42	30.576	7.93567	3.54894	40.4294	20.7226	5		28.712	3.34882	1.49764	32.8701	24.5539	5
6.5	30.634	8.19793	3.66623	40.8131	20.4549	5		27.626	6.26328	2.80102	35.4029	19.8491	5
6.58	30.726	5.80001	2.59384	37.9277	23.5243	5		28.586	5.99443	2.68079	36.0291	21.1429	5
6.67	32.668	7.59874	3.39826	42.1031	23.2329	5		28.99	7.98781	3.57226	38.9082	19.0718	5
6.75	29.796	8.56398	3.82993	40.4296	19.1624	5		31.872	14.7	6.57403	50.1244	13.6196	5
6.83	28.018	4.17892	1.86887	33.2068	22.8292	5		27.928	6.9429	3.10496	36.5487	19.3073	5
6.92	31.748	5.51114	2.46465	38.591	24.905	5		32.65	9.27991	4.1501	44.1725	21.1275	5
7	31.944	10.8805	4.86591	45.4539	18.4341	5		30.068	8.77388	3.9238	40.9622	19.1738	5
7.08	27.478	6.86494	3.07009	36.0019	18.9541	5		30.288	7.88784	3.52755	40.082	20.494	5
7.17	27.968	5.41215	2.42039	34.6881	21.2479	5		34.048	13.0278	5.8262	50.2241	17.8719	5
7.25	28.696	5.94687	2.65952	36.08	21.312	5		31.516	12.3685	5.53135	46.8735	16.1585	5
7.33	28.932	8.19211	3.66362	39.1038	18.7602	5		25.148	5.09497	2.27854	31.4742	18.8218	5
7.42	33.456	10.1867	4.55564	46.1045	20.8075	5		24.65	6.71928	3.00495	32.9931	16.3069	5
7.5	28.776	8.97825	4.0152	39.924	17.628	5		30.368	12.1145	5.41776	45.4101	15.3259	5
7.58	27.156	8.28356	3.70452	37.4414	16.8706	5		27.284	4.34276	1.94214	32.6763	21.8917	5
7.67	30.536	8.34813	3.7334	40.9016	20.1704	5		35.012	21.452	9.59363	61.6482	8.37582	5
7.75	29.018	5.74255	2.56815	36.1483	21.8877	5		34.11	15.0083	6.71192	52.7453	15.4747	5
7.83	29.336	9.16726	4.09973	40.7187	17.9533	5		32.726	19.0504	8.51958	56.3801	9.07186	5
7.92	32.592	9.88434	4.42041	44.865	20.319	5		26	4.62952	2.07038	31.7483	20.2517	5
8	30.756	7.11858	3.18353	39.5949	21.9171	5		27.016	5.90929	2.64272	34.3534	19.6786	5
8.08	29.744	5.53141	2.47372	36.6122	22.8758	5		27.146	6.82289	3.05129	35.6177	18.6743	5
8.17	31.412	8.10704	3.62558	41.4782	21.3458	5		25.74	7.86878	3.51903	35.5104	15.9696	5
8.25	30.39	6.99493	3.12823	39.0754	21.7046	5		24.734	5.86583	2.62328	32.0174	17.4506	5
8.33	31.182	7.52835	3.36678	40.5297	21.8343	5		24.824	4.17326	1.86634	30.0058	19.6422	5
8.42	25.946	8.80145	3.93613	36.8744	15.0176	5		26.724	5.85317	2.61762	33.9917	19.4563	5
8.5	32.236	6.58715	2.94586	40.415	24.057	5		25.034	2.00855	0.898252	27.5279	22.5401	5
8.58	31.332	8.15059	3.64505	41.4523	21.2117	5		21.97	7.33694	3.28118	31.08	12.86	5
8.67	27.722	5.81149	2.59898	34.9379	20.5061	5		24.374	7.02266	3.14063	33.0938	15.6542	5
8.75	28.356	7.84157	3.50686	38.0926	18.6194	5		28.174	9.60705	4.2964	40.1027	16.2453	5
8.83	29.856	6.84926	3.06308	38.3605	21.3515	5		27.622	7.20757	3.22332	36.5714	18.6726	5
8.92	29.762	5.58193	2.49632	36.6929	22.8311	5		28.606	8.13249	3.63696	38.7038	18.5082	5
9	30.772	5.56233	2.48755	37.6785	23.8655	5		28.116	7.95678	3.55838	37.9956	18.2364	5
9.08	26.856	7.59523	3.39669	36.2867	17.4253	5		31.77	10.6085	4.74426	44.9422	18.5978	5
9.17	27.672	7.89048	3.52873	37.4693	17.8747	5		24.43	6.0223	2.69325	31.9077	16.9523	5
9.25	30.458	5.034	2.25127	36.7085	24.2075	5		24.034	4.97496	2.22487	30.2112	17.8568	5
9.33	27.852	7.24816	3.24148	36.8518	18.8522	5		25.042	5.49638	2.45805	31.8667	18.2173	5
9.42	27.772	7.59109	3.39484	37.1976	18.3464	5		25.982	6.84142	3.05957	34.4767	17.4873	5
9.5	28.564	7.3514	3.28764	37.692	19.436	5		32.986	8.83974	3.95325	43.962	22.01	5
9.58	28.266	6.78439	3.03407	36.6899	19.8421	5		35.444	11.1463	4.98479	49.284	21.604	5
9.67	30.686	4.47141	1.99967	36.238	25.134	5		32.842	9.78704	4.3769	44.9942	20.6898	5
9.75	27.168	7.3783	3.29967	36.3294	18.0066	5		27.76	3.38619	1.51435	31.9645	23.5555	5
9.83	28.89	8.09923	3.62208	38.9465	18.8335	5		29.554	5.63427	2.51972	36.5499	22.5581	5
9.92	29.342	9.3242	4.16991	40.9195	17.7645	5		26.958	7.2521	3.24324	35.9627	17.9533	5
10	29.08	6.08681	2.72211	36.6378	21.5222	5		27.946	9.55252	4.27202	39.807	16.085	5
10.08	29.092	6.05744	2.70897	36.6133	21.5707	5		27.768	8.64183	3.86474	38.4982	17.0378	5
10.17	30.308	6.58123	2.94321	38.4797	22.1363	5		26.93	8.91679	3.98771	38.0017	15.8583	5
10.25	29.68	6.88315	3.07824	38.2266	21.1334	5		28.06	7.96064	3.56011	37.9444	18.1756	5
10.33	29.288	8.37267	3.74437	39.684	18.892	5		30.744	7.51371	3.36023	40.0735	21.4145	5
10.42	29.968	10.1441	4.5366	42.5636	17.3724	5		30.648	6.23509	2.78842	38.3899	22.9061	5
10.5	29.216	7.84259	3.50731	38.9539	19.4781	5		25.392	5.72608	2.56078	32.5019	18.2821	5
10.58	29.976	8.49182	3.79766	40.52	19.432	5		28.11	7.98471	3.57087	38.0243	18.1957	5
10.67	31.704	7.79849	3.48759	41.3871	22.0209	5		32.326	9.44669	4.22469	44.0556	20.5964	5
10.75	27.408	5.40671	2.41795	34.1213	20.6947	5		29.092	6.95644	3.11102	37.7296	20.4544	5
10.83	27.786	6.00176	2.68407	35.2382	20.3338	5		24.582	4.42339	1.9782	30.0744	19.0896	5
10.92	29.258	4.27786	1.91312	34.5697	23.9463	5		36.69	18.9303	8.46588	60.1951	13.1849	5
11	31.248	7.32243	3.27469	40.34	22.156	5		30.538	7.45037	3.33191	39.7889	21.2871	5
11.08	30.786	4.42069	1.97699	36.275	25.297	5		29.486	4.90704	2.19449	35.5789	23.3931	5
11.17	28.334	6.15657	2.7533	35.9784	20.6896	5		26.84	9.59321	4.29022	38.7515	14.9285	5
11.25	32.07	7.29703	3.26333	41.1305	23.0095	5		29.124	10.5189	4.70421	42.185	16.063	5
11.33	29.424	5.97402	2.67166	36.8417	22.0063	5		29.18	10.1386	4.53412	41.7687	16.5913	5
11.42	31.512	8.2832	3.70436	41.797	21.227	5		27.668	11.3007	5.05382	41.6997	13.6363	5
11.5	31.842	4.43984	1.98556	37.3548	26.3292	5		26.204	8.57088	3.83301	36.8462	15.5618	5
11.58	32.89	5.09594	2.27897	39.2174	26.5626	5		23.028	6.91063	3.09053	31.6087	14.4473	5
11.67	29.958	8.4018	3.7574	40.3902	19.5258	5		25.794	6.81859	3.04936	34.2604	17.3276	5
11.75	32.852	5.99428	2.68072	40.2949	25.4091	5		25.82	7.28451	3.25773	34.8649	16.7751	5
11.83	33.554	6.87051	3.07259	42.0849	25.0231	5		27.122	10.2578	4.58744	39.8588	14.3852	5
11.92	32.832	8.38699	3.75078	43.2458	22.4182	5		27.064	6.38999	2.85769	34.9982	19.1298	5
12	32.37	10.1703	4.5483	44.9981	19.7419	5		27.94	9.56305	4.27672	39.8141	16.0659	5
12.08	31.936	10.2873	4.6006	44.7093	19.1627	5		30.026	12.1345	5.42671	45.093	14.959	5
12.17	31.506	7.7471	3.46461	41.1253	21.8867	5		27.936	9.77474	4.3714	40.0729	15.7991	5
12.25	31.8	10.7409	4.80348	45.1366	18.4634	5		28.744	12.2351	5.4717	43.9359	13.5521	5
12.33	31.394	8.12834	3.6351	41.4867	21.3013	5		29.298	14.7126	6.57969	47.5661	11.0299	5
12.42	29.282	9.33741	4.17582	40.8759	17.6881	5		22.732	10.6173	4.74819	35.9151	9.54892	5
12.5	29.018	9.7047	4.34008	41.068	16.968	5		23.69	9.66118	4.32061	35.6859	11.6941	5
12.58	30.126	10.1828	4.55389	42.7696	17.4824	5		22.762	8.43581	3.77261	33.2364	12.2876	5
12.67	28.298	10.9588	4.90094	41.9052	14.6908	5		23.72	8.66139	3.87349	34.4745	12.9655	5
12.75	28.924	9.52184	4.2583	40.7469	17.1011	5		22.398	8.51496	3.80801	32.9707	11.8253	5
12.83	29.126	8.70491	3.89295	39.9346	18.3174	5		23.938	6.56708	2.93689	32.0921	15.7839	5
12.92	26.858	8.80141	3.93611	37.7864	15.9296	5		25.866	7.77478	3.47699	35.5197	16.2123	5
13	27.702	9.18972	4.10977	39.1125	16.2915	5		26.106	7.41717	3.31706	35.3156	16.8964	5
13.08	26.608	11.4457	5.11865	40.8197	12.3963	5		25.682	7.66163	3.42638	35.1952	16.1688	5
13.17	27.048	10.2306	4.57528	39.751	14.345	5		24.702	9.50171	4.24929	36.4999	12.9041	5
13.25	26.622	7.3668	3.29453	35.7691	17.4749	5		26.714	10.3509	4.62908	39.5664	13.8616	5
13.33	27.388	9.72493	4.34912	39.4631	15.3129	5		28.884	17.1315	7.66142	50.1555	7.61249	5
13.42	28.522	4.42211	1.97763	34.0128	23.0312	5		28.976	12.7894	5.71961	44.8562	13.0958	5
13.5	29.724	7.37336	3.29747	38.8792	20.5688	5		26.876	12.4049	5.54762	42.2787	11.4733	5
13.58	28.126	6.2866	2.81145	35.9318	20.3202	5		24.158	10.5464	4.71649	37.2531	11.0629	5
13.67	29.706	7.3054	3.26708	38.7769	20.6351	5		23.254	9.45748	4.22951	34.997	11.511	5
13.75	26.116	7.4866	3.34811	35.4118	16.8202	5		25.742	9.72108	4.3474	37.8123	13.6717	5
13.83	31.344	8.1304	3.63603	41.4392	21.2488	5		23.936	8.00841	3.58147	33.8798	13.9922	5
13.92	30.21	9.10192	4.0705	41.5115	18.9085	5		26.4	9.15105	4.09247	37.7625	15.0375	5
14	29.904	9.32031	4.16817	41.4767	18.3313	5		28.692	8.25199	3.6904	38.9382	18.4458	5
14.08	28.95	8.23371	3.68223	39.1735	18.7265	5		26.68	10.0264	4.48396	39.1295	14.2305	5
14.17	29.968	9.38271	4.19608	41.6182	18.3178	5		27.072	9.04347	4.04436	38.3009	15.8431	5
14.25	25.658	4.34981	1.9453	31.059	20.257	5		25.736	7.12336	3.18566	34.5808	16.8912	5
14.33	25.956	5.63382	2.51952	32.9513	18.9607	5		24.262	6.87635	3.0752	32.8001	15.7239	5
14.42	25.96	5.34711	2.3913	32.5993	19.3207	5		21.798	9.88786	4.42199	34.0754	9.5206	5
14.5	26.518	9.95681	4.45282	38.881	14.155	5		21.14	10.0917	4.51316	33.6705	8.60945	5
14.58	25.196	6.36196	2.84515	33.0954	17.2966	5		20.126	8.62347	3.85653	30.8335	9.41855	5
14.67	26.852	7.68292	3.43591	36.3916	17.3124	5		19.856	6.80917	3.04515	28.3107	11.4013	5
14.75	27.014	6.10005	2.72803	34.5882	19.4398	5		21.238	5.81242	2.59939	28.4551	14.0209	5
14.83	28.9	7.47243	3.34177	38.1782	19.6218	5		19.784	6.21759	2.78059	27.5042	12.0638	5
14.92	28.558	10.6867	4.77923	41.8273	15.2887	5		20.086	7.7568	3.46895	29.7173	10.4547	5
15	26.068	6.54673	2.92779	34.1968	17.9392	5		21.086	8.74972	3.91299	31.9502	10.2218	5
15.08	24.032	10.1795	4.55239	36.6715	11.3925	5		19.108	7.47721	3.34391	28.3922	9.82382	5
15.17	23.514	9.51682	4.25605	35.3307	11.6973	5		19.588	6.62967	2.96488	27.8198	11.3562	5
15.25	23.916	8.37598	3.74585	34.3161	13.5159	5		21.038	7.56529	3.3833	30.4315	11.6445	5
15.33	24.458	8.53209	3.81567	35.052	13.864	5		18.638	8.66624	3.87566	29.3986	7.87744	5
15.42	27.5	11.8909	5.31777	42.2645	12.7355	5		19.956	9.86075	4.40986	32.1997	7.71226	5
15.5	27.12	10.5691	4.72664	40.2433	13.9967	5		21.508	8.71136	3.89584	32.3246	10.6914	5
15.58	31.642	8.31193	3.71721	41.9626	21.3214	5		22.27	9.56764	4.27878	34.1498	10.3902	5
15.67	29.78	13.2663	5.93287	46.2523	13.3077	5		21.114	8.16902	3.6533	31.2572	10.9708	5
15.75	26.972	10.3466	4.62714	39.819	14.125	5		24.81	9.76426	4.36671	36.9339	12.6861	5
15.83	27.638	12.8207	5.73358	43.557	11.719	5		22.278	8.85702	3.96098	33.2754	11.2806	5
15.92	24.496	10.7476	4.80647	37.8409	11.1511	5		22.774	8.53998	3.81919	33.3778	12.1702	5
16	23.584	7.98244	3.56986	33.4955	13.6725	5		25.712	14.735	6.58969	44.0079	7.4161	5
16.08	31.132	8.94186	3.99892	42.2348	20.0292	5		23.022	8.68768	3.88525	33.8092	12.2348	5
16.17	28.804	5.98307	2.67571	36.233	21.375	5		26.418	18.1382	8.11163	48.9395	3.8965	5
16.25	27.686	3.86856	1.73007	32.4894	22.8826	5		24.344	9.60462	4.29532	36.2697	12.4183	5
16.33	25.114	7.22329	3.23035	34.0829	16.1451	5		24.838	11.0943	4.96151	38.6134	11.0626	5
16.42	23.304	7.8691	3.51917	33.0748	13.5332	5		20.81	8.10923	3.62656	30.8789	10.7411	5
16.5	23.434	6.5874	2.94597	31.6133	15.2547	5		20.416	8.24883	3.68899	30.6583	10.1737	5
16.58	24.334	8.74714	3.91184	35.195	13.473	5		20.328	8.41064	3.76135	30.7712	9.88481	5
16.67	21.878	6.80382	3.04276	30.3261	13.4299	5		20.8	9.91041	4.43207	33.1054	8.49461	5
16.75	23.118	11.6533	5.2115	37.5874	8.64856	5		23.724	11.2859	5.0472	37.7373	9.71073	5
16.83	22.764	9.04038	4.04298	33.9891	11.5389	5		23.002	9.9244	4.43832	35.3248	10.6792	5
16.92	22.52	7.84542	3.50858	32.2614	12.7786	5		21.284	8.6981	3.88991	32.0841	10.4839	5
17	22.598	7.21274	3.22563	31.5538	13.6422	5		20.986	8.82325	3.94588	31.9415	10.0305	5
17.08	22.898	6.92738	3.09802	31.4995	14.2965	5		20.906	8.9461	4.00082	32.0141	9.79794	5
17.17	27.186	5.93728	2.65523	34.5581	19.8139	5		19.91	8.40302	3.75795	30.3437	9.47627	5
17.25	27.852	7.93705	3.54956	37.7071	17.9969	5		21.586	9.93137	4.44144	33.9174	9.25458	5
17.33	27.548	15.0419	6.72694	46.225	8.87102	5		21.284	9.87069	4.4143	33.5401	9.02793	5
17.42	29.018	14.5292	6.49765	47.0584	10.9776	5		22.228	9.34018	4.17706	33.8254	10.6306	5
17.5	25.046	10.0135	4.47816	37.4794	12.6126	5		25.282	12.4449	5.56555	40.7344	9.82956	5
17.58	25.688	15.1578	6.77877	44.5089	6.86711	5		23.164	7.02895	3.14344	31.8916	14.4364	5
17.67	24.082	10.1961	4.55984	36.7421	11.4219	5		23.752	5.2396	2.34322	30.2578	17.2462	5
17.75	25.224	4.87361	2.17954	31.2754	19.1726	5		21.546	3.72924	1.66777	26.1765	16.9155	5
17.83	25.462	3.54338	1.58465	29.8617	21.0623	5		23.562	3.22449	1.44203	27.5657	19.5583	5
17.92	23.208	5.87334	2.62664	30.5007	15.9153	5		20.81	7.06164	3.15806	29.5782	12.0418	5
18	26.344	8.71182	3.89604	37.1612	15.5268	5		25.182	11.2243	5.01965	39.1188	11.2452	5
18.08	25.978	6.9969	3.12911	34.6658	17.2902	5		26.318	11.664	5.21631	40.8008	11.8352	5
18.17	24.27	6.68286	2.98867	32.5679	15.9721	5		21.958	9.92488	4.43854	34.2814	9.63463	5
18.25	24.536	8.02097	3.58709	34.4954	14.5766	5		23.914	10.9184	4.88285	37.471	10.357	5
18.33	26.326	7.58035	3.39003	35.7382	16.9138	5		22.41	7.67109	3.43062	31.9349	12.8851	5
18.42	28.898	12.932	5.78337	44.9552	12.8408	5		24.79	11.1144	4.97049	38.5903	10.9897	5
18.5	31.162	13.6707	6.11374	48.1365	14.1875	5		23.656	10.5567	4.72112	36.7639	10.5481	5
18.58	26.706	10.9242	4.88544	40.2702	13.1418	5		22.864	9.66291	4.32138	34.8621	10.8659	5
18.67	27.33	11.316	5.06068	41.3807	13.2793	5		23.598	8.97114	4.01201	34.7371	12.4589	5
18.75	22.266	11.6453	5.20796	36.7256	7.80639	5		24.302	8.44976	3.77885	34.7938	13.8102	5
18.83	27.562	5.29442	2.36774	34.1359	20.9881	5		24.94	11.0591	4.94579	38.6717	11.2083	5
18.92	27.176	5.20107	2.32599	33.634	20.718	5		23.394	10.8277	4.84229	36.8384	9.94964	5
19	26.508	5.79702	2.59251	33.706	19.31	5		20.6	8.79446	3.933	31.5198	9.68023	5
19.08	24.896	3.76756	1.68491	29.574	20.218	5		20.98	8.98076	4.01632	32.1311	9.82892	5
19.17	25.756	7.84393	3.50791	35.4955	16.0165	5		19.874	9.62776	4.30567	31.8284	7.91955	5
19.25	25.766	9.5614	4.27599	37.638	13.894	5		18.804	7.51859	3.36242	28.1396	9.46843	5
19.33	25.682	4.62525	2.06848	31.425	19.939	5		20.58	8.52636	3.81311	31.1669	9.99312	5
19.42	26.312	7.7559	3.46854	35.9422	16.6818	5		23.786	10.0481	4.49365	36.2624	11.3096	5
19.5	24.994	6.08917	2.72316	32.5547	17.4333	5		27.666	5.20898	2.32952	34.1338	21.1982	5
19.58	25.068	7.18829	3.2147	33.9934	16.1426	5		27.42	8.12357	3.63297	37.5067	17.3333	5
19.67	25.572	8.94409	3.99992	36.6776	14.4664	5		27.73	6.10241	2.72908	35.3071	20.1529	5
19.75	24.328	6.43482	2.87774	32.3179	16.3381	5		23.868	9.71143	4.34308	35.9263	11.8097	5
19.83	24.206	7.04754	3.15176	32.9567	15.4553	5		25.436	8.33192	3.72615	35.7814	15.0906	5
19.92	26.074	7.73871	3.46085	35.6829	16.4651	5		22.096	7.30971	3.269	31.1722	13.0198	5
20	25.856	5.2939	2.3675	32.4292	19.2828	5		19.98	7.2733	3.25272	29.011	10.949	5
20.08	22.956	9.74453	4.35788	35.0554	10.8566	5		23.032	6.64054	2.96974	31.2773	14.7867	5
20.17	24.254	10.8964	4.87303	37.7837	10.7243	5		23.27	6.99069	3.12633	31.9501	14.5899	5
20.25	27.458	6.71086	3.00119	35.7906	19.1254	5		23.904	5.23137	2.33954	30.3996	17.4084	5
20.33	26.994	7.41238	3.31492	36.1977	17.7903	5		23.53	8.73908	3.90824	34.381	12.679	5
20.42	31.106	7.80943	3.49248	40.8027	21.4093	5		22.318	9.03742	4.04165	33.5394	11.0966	5
20.5	29.076	7.28233	3.25676	38.1182	20.0338	5		22.002	9.45407	4.22799	33.7408	10.2632	5
20.58	29.916	9.1042	4.07152	41.2204	18.6116	5		20.942	7.94287	3.55216	30.8044	11.0796	5
20.67	27.412	10.2871	4.60052	40.1851	14.6389	5		24.474	5.2237	2.33611	30.9601	17.9879	5
20.75	26.15	8.72148	3.90036	36.9791	15.3209	5		26.524	8.78769	3.92997	37.4354	15.6126	5
20.83	27.218	7.7799	3.47928	36.878	17.558	5		26.366	7.18823	3.21467	35.2914	17.4406	5
20.92	26.17	8.91685	3.98774	37.2417	15.0983	5		23.11	8.46222	3.78442	33.6172	12.6028	5
21	23.574	9.25371	4.13838	35.064	12.084	5		21.65	10.5966	4.73897	34.8075	8.49252	5
21.08	25.84	9.47814	4.23875	37.6087	14.0713	5		22.53	9.36281	4.18718	34.1555	10.9045	5
21.17	25.452	10.4097	4.65537	38.3774	12.5266	5		22.676	10.5878	4.73502	35.8225	9.52946	5
21.25	26.446	10.7148	4.7918	39.7502	13.1418	5		22.352	9.22294	4.12462	33.8038	10.9002	5
21.33	25.47	7.92393	3.54369	35.3089	15.6311	5		21.364	9.37541	4.19281	33.0051	9.72289	5
21.42	25.144	8.49409	3.79867	35.6908	14.5972	5		23.114	10.281	4.59782	35.8796	10.3484	5
21.5	26.722	8.50824	3.805	37.2864	16.1576	5		21.568	5.09037	2.27648	27.8885	15.2475	5
21.58	26.796	7.15454	3.19961	35.6795	17.9125	5		24.174	4.98563	2.22964	30.3645	17.9835	5
21.67	25.12	7.92359	3.54354	34.9584	15.2816	5		22.182	7.99736	3.57653	32.112	12.252	5
21.75	26.826	9.25454	4.13876	38.317	15.335	5		25.04	8.17661	3.65669	35.1926	14.8874	5
21.83	29.118	5.54678	2.4806	36.0052	22.2308	5		22.58	6.65756	2.97735	30.8464	14.3136	5
21.92	27.168	7.09194	3.17161	35.9738	18.3622	5		24.202	6.26207	2.80048	31.9774	16.4266	5
22	25.376	5.64462	2.52435	32.3847	18.3673	5		24.212	6.02687	2.6953	31.6953	16.7287	5
22.08	27.746	3.91893	1.7526	32.612	22.88	5		22.862	5.86204	2.62158	30.1407	15.5833	5
22.17	28.326	8.61955	3.85478	39.0286	17.6234	5		25.7	8.54286	3.82048	36.3074	15.0926	5
22.25	26.424	6.07755	2.71796	33.9703	18.8777	5		25.922	6.28573	2.81106	33.7268	18.1172	5
22.33	27.29	6.65774	2.97743	35.5567	19.0233	5		23.184	9.94461	4.44737	35.5319	10.8361	5
22.42	27.064	7.73719	3.46018	36.671	17.457	5		21.23	8.71309	3.89661	32.0487	10.4113	5
22.5	28.972	4.00793	1.7924	33.9485	23.9955	5		26.768	7.3322	3.27906	35.8721	17.6639	5
22.58	25.824	5.3263	2.38199	32.4375	19.2105	5		31.39	10.2863	4.60017	44.1621	18.6179	5
22.67	26.11	5.66731	2.5345	33.1469	19.0731	5		26.504	13.2396	5.92094	42.9432	10.0648	5
22.75	30.216	4.60861	2.06104	35.9384	24.4936	5		25.784	10.4562	4.67618	38.7671	12.8009	5
22.83	27.522	5.76716	2.57915	34.6829	20.3611	5		29.02	10.6883	4.77994	42.2912	15.7488	5
22.92	29.416	7.5076	3.3575	38.7379	20.0941	5		23.35	8.66896	3.87688	34.1139	12.5861	5
23	28.438	6.46241	2.89008	36.4621	20.4139	5		24.032	11.123	4.97436	37.843	10.221	5
23.08	25.892	6.60722	2.95484	34.0959	17.6881	5		24.824	10.6052	4.7428	37.9921	11.6559	5
23.17	27.276	6.95927	3.11228	35.9171	18.6349	5		25.31	6.27393	2.80579	33.1001	17.5199	5
23.25	29.87	7.96135	3.56043	39.7553	19.9847	5		25.944	6.71362	3.00242	34.2801	17.6079	5
23.33	30.26	7.4144	3.31582	39.4662	21.0538	5		27.08	7.13557	3.19112	35.94	18.22	5
23.42	29.048	4.89871	2.19077	35.1305	22.9655	5		22.57	6.73954	3.01402	30.9382	14.2018	5
23.5	27.694	4.25663	1.90362	32.9793	22.4087	5		24.222	6.10229	2.72903	31.799	16.645	5
23.58	29.888	4.92714	2.20348	36.0059	23.7701	5		25.472	6.71091	3.00121	33.8047	17.1393	5
23.67	23.422	5.04873	2.25786	29.6908	17.1532	5		23.642	6.51163	2.91209	31.7273	15.5567	5
23.75	26.072	5.38868	2.40989	32.7629	19.3811	5		23.456	4.41687	1.97528	28.9403	17.9717	5
23.83	28.374	5.23124	2.33948	34.8694	21.8786	5		28.398	8.38354	3.74923	38.8075	17.9885	5
23.92	29.386	6.35368	2.84145	37.2751	21.4969	5		29.02	5.55687	2.48511	35.9198	22.1202	5
24	31.596	5.03447	2.25148	37.8471	25.3449	5		25.892	8.52492	3.81246	36.4771	15.3069	5
24.08	26.35	3.46527	1.54972	30.6527	22.0473	5		31.224	11.356	5.07858	45.3244	17.1236	5
24.17	25.73	5.34543	2.39055	32.3672	19.0928	5		27.062	5.12286	2.29101	33.4229	20.7011	5
24.25	27.87	2.78548	1.2457	31.3286	24.4114	5		31.516	11.2361	5.02494	45.4675	17.5645	5
24.33	25.07	3.00331	1.34312	28.7991	21.3409	5		26.712	7.64018	3.41679	36.1985	17.2255	5
24.42	27.348	4.08299	1.82597	32.4177	22.2783	5		24.162	6.51903	2.9154	32.2564	16.0676	5
24.5	27.782	4.13774	1.85046	32.9197	22.6443	5		30.736	12.735	5.69525	46.5485	14.9235	5
24.58	24.988	6.42622	2.87389	32.9672	17.0088	5		28.234	6.8684	3.07164	36.7623	19.7057	5
24.67	25.464	5.88606	2.63233	32.7725	18.1555	5		26.912	7.26763	3.25018	35.936	17.888	5
24.75	29.038	3.66028	1.63693	33.5828	24.4932	5		28.57	7.78793	3.48287	38.24	18.9	5
24.83	28.176	7.55017	3.37654	37.5508	18.8012	5		27.418	9.16832	4.1002	38.802	16.034	5
24.92	29.12	6.57222	2.93919	37.2805	20.9595	5		30.394	10.1788	4.5521	43.0327	17.7553	5
25	26.262	6.63213	2.96598	34.4969	18.0271	5		28.094	7.44988	3.33169	37.3442	18.8438	5
25.08	29.872	5.63845	2.52159	36.8731	22.8709	5		30.464	13.8488	6.19338	47.6596	13.2684	5
25.17	31.202	7.52253	3.36418	40.5425	21.8615	5		26.12	7.99168	3.57399	36.043	16.197	5
25.25	33.254	8.43563	3.77253	43.7282	22.7798	5		25.362	6.80789	3.04458	33.8151	16.9089	5
25.33	29.184	8.55373	3.82535	39.8049	18.5631	5		29.434	6.86046	3.06809	37.9524	20.9156	5
25.42	31.664	7.9218	3.54274	41.5002	21.8278	5		25.266	7.88482	3.5262	35.0563	15.4757	5
25.5	30.142	7.47789	3.34421	39.427	20.857	5		25.414	4.49492	2.01019	30.9952	19.8328	5
25.58	31.908	8.10493	3.62463	41.9716	21.8444	5		27.666	2.3617	1.05618	30.5984	24.7336	5
25.67	29.322	9.43834	4.22095	41.0412	17.6028	5		25.478	6.05026	2.70576	32.9904	17.9656	5
25.75	29.838	3.84032	1.71744	34.6064	25.0696	5		27.896	7.56011	3.38098	37.2831	18.5089	5
25.83	27.886	6.81145	3.04617	36.3435	19.4285	5		26.066	5.11244	2.28635	32.4139	19.7181	5
25.92	30.798	6.21778	2.78068	38.5184	23.0776	5		25.558	6.56294	2.93504	33.707	17.409	5
26	28.294	6.18194	2.76465	35.9699	20.6181	5		30.4	10.3141	4.6126	43.2066	17.5934	5
26.08	30.418	4.35163	1.94611	35.8213	25.0147	5		24.73	4.15392	1.85769	29.8878	19.5722	5
26.17	27.654	4.28158	1.91478	32.9703	22.3377	5		26.124	10.1754	4.55056	38.7584	13.4896	5
26.25	29.1	6.28669	2.81149	36.906	21.294	5		24.074	3.16369	1.41484	28.0022	20.1458	5
26.33	28.588	7.56996	3.38539	37.9873	19.1887	5		27.382	2.56076	1.1452	30.5616	24.2024	5
26.42	28.496	4.99071	2.23192	34.6928	22.2992	5		27.612	6.29294	2.81429	35.4257	19.7983	5
26.5	29.468	5.55391	2.48378	36.3641	22.5719	5		28.322	8.98141	4.01661	39.4739	17.1701	5
26.58	26.362	4.69135	2.09803	32.1871	20.5369	5		26.04	6.89284	3.08257	34.5986	17.4814	5
26.67	26.63	5.78261	2.58606	33.8101	19.4499	5		25.696	6.16826	2.75853	33.3549	18.0371	5
26.75	27.334	5.99199	2.6797	34.774	19.894	5		27.554	4.22131	1.88783	32.7954	22.3126	5
26.83	27.914	8.03867	3.595	37.8953	17.9327	5		25.576	4.95297	2.21503	31.7259	19.4261	5
26.92	27.2	6.60474	2.95373	35.4009	18.9991	5		27.112	4.64664	2.07804	32.8816	21.3424	5
27	27.608	6.71229	3.00183	35.9424	19.2736	5		26.482	2.25723	1.00946	29.2847	23.6793	5
27.08	26.212	6.55805	2.93285	34.3549	18.0691	5		30.088	10.3045	4.6083	42.8827	17.2933	5
27.17	27.02	3.30627	1.47861	31.1253	22.9147	5		26.314	9.07094	4.05665	37.5771	15.0509	5
27.25	27.844	4.00302	1.7902	32.8144	22.8736	5		27.198	9.55285	4.27217	39.0594	15.3366	5
27.33	27.682	5.32292	2.38048	34.2913	21.0727	5		30.566	11.7565	5.25766	45.1636	15.9684	5
27.42	26.114	4.93251	2.20588	32.2385	19.9895	5		27.102	8.95646	4.00545	38.2229	15.9811	5
27.5	22.98	4.88897	2.18641	29.0505	16.9095	5		26.176	3.27975	1.46675	30.2483	22.1037	5
27.58	30.274	3.2947	1.47343	34.3649	26.1831	5		24.03	3.97815	1.77908	28.9695	19.0905	5
27.67	31.306	4.5347	2.02798	36.9366	25.6754	5		25.17	4.91603	2.19852	31.2741	19.0659	5
27.75	31.642	4.49286	2.00927	37.2206	26.0634	5		26.06	5.84195	2.6126	33.3137	18.8063	5
27.83	26.364	6.31463	2.82399	34.2046	18.5234	5		23.884	4.70899	2.10592	29.731	18.037	5
27.92	28.104	5.31815	2.37835	34.7074	21.5006	5		28.586	7.30902	3.26869	37.6614	19.5106	5
28	27.558	5.60549	2.50685	34.5181	20.5979	5		25.93	4.86339	2.17497	31.9687	19.8913	5
28.08	28.378	6.86383	3.0696	36.9006	19.8554	5		28.376	4.91321	2.19725	34.4766	22.2754	5
28.17	27.204	4.04253	1.80787	32.2235	22.1845	5		31.734	7.40712	3.31257	40.9312	22.5368	5
28.25	28.292	5.5048	2.46182	35.1271	21.4569	5		27.274	4.95777	2.21718	33.4299	21.1181	5
28.33	29.512	4.65389	2.08128	35.2906	23.7334	5		27.612	5.93489	2.65416	34.9811	20.2429	5
28.42	30.094	7.67567	3.43267	39.6246	20.5634	5		30.812	6.48431	2.89987	38.8633	22.7607	5
28.5	29.574	8.0081	3.58133	39.5174	19.6306	5		30.628	6.51671	2.91436	38.7196	22.5364	5
28.58	29.004	8.72221	3.90069	39.8341	18.1739	5		24.974	6.81228	3.04654	33.4326	16.5154	5
28.67	29.076	9.49374	4.24573	40.864	17.288	5		30.268	10.8212	4.83941	43.7043	16.8317	5
28.75	29.03	8.46819	3.78709	39.5447	18.5153	5		24.102	6.45318	2.88595	32.1147	16.0893	5
28.83	27.446	6.93681	3.10224	36.0592	18.8328	5		26.33	7.08298	3.1676	35.1247	17.5353	5
28.92	27.454	7.4353	3.32517	36.6861	18.2219	5		27.842	10.6527	4.76402	41.069	14.615	5
29	27.454	6.80071	3.04137	35.8982	19.0098	5		29.05	8.12875	3.63529	39.1432	18.9568	5
29.08	28.514	6.69984	2.99626	36.8329	20.1951	5		31.094	8.86202	3.96322	42.0977	20.0903	5
29.17	28.874	4.57292	2.04507	34.552	23.196	5		29.044	6.37865	2.85262	36.9641	21.1239	5
29.25	25.264	4.86266	2.17465	31.3018	19.2262	5		27.056	4.45197	1.99098	32.5839	21.5281	5
29.33	28.81	5.58413	2.4973	35.7436	21.8764	5		27.258	7.36104	3.29196	36.3979	18.1181	5
29.42	29.148	3.86464	1.72832	33.9466	24.3494	5		28.598	6.50107	2.90737	36.6701	20.5259	5
29.5	28.784	6.28111	2.809	36.583	20.985	5		25.106	4.51648	2.01983	30.7139	19.4981	5
29.58	29.328	5.58658	2.49839	36.2647	22.3913	5		27.726	6.76083	3.02353	36.1207	19.3313	5
29.67	27.934	3.5857	1.60357	32.3862	23.4818	5		27.786	4.51538	2.01934	33.3926	22.1794	5
29.75	28.224	6.39967	2.86202	36.1702	20.2778	5		27.376	9.43272	4.21844	39.0883	15.6637	5
29.83	28.526	6.48721	2.90117	36.5809	20.4711	5		27.422	5.37319	2.40296	34.0937	20.7503	5
29.92	28.516	7.77406	3.47667	38.1688	18.8632	5		27.096	5.95094	2.66134	34.4851	19.7069	5
30	30.044	6.01016	2.68783	37.5066	22.5814	5		28.552	5.65939	2.53096	35.5791	21.5249	5
30.08	27.612	6.88155	3.07752	36.1566	19.0674	5		26.606	6.36579	2.84687	34.5102	18.7018	5
30.17	30.75	7.44198	3.32816	39.9904	21.5096	5		31.954	13.7124	6.13236	48.9802	14.9278	5
30.25	29.5	7.29951	3.26444	38.5635	20.4365	5		30.176	9.5032	4.24996	41.9758	18.3762	5
30.33	28.734	5.74571	2.56956	35.8682	21.5998	5		27.946	5.32649	2.38208	34.5597	21.3323	5
30.42	28.05	6.97449	3.11909	36.71	19.39	5		32.592	9.87053	4.41424	44.8479	20.3361	5
30.5	28.95	5.98882	2.67828	36.3861	21.5139	5		29.022	6.07074	2.71492	36.5598	21.4842	5
30.58	28.844	7.67955	3.4344	38.3794	19.3086	5		29.132	7.04467	3.15047	37.8791	20.3849	5
30.67	28.172	8.51289	3.80708	38.7421	17.6019	5		30.28	11.6072	5.19091	44.6923	15.8677	5
30.75	28.686	6.88865	3.0807	37.2394	20.1326	5		26.65	9.17424	4.10285	38.0413	15.2587	5
30.83	29.486	9.79128	4.37879	41.6435	17.3285	5		25.44	9.69818	4.33716	37.4819	13.3981	5
30.92	27.7	8.84633	3.9562	38.6842	16.7158	5		24.682	6.57208	2.93912	32.8423	16.5217	5
31	27.622	4.99602	2.23429	33.8254	21.4186	5		25.902	8.19137	3.66329	36.0729	15.7311	5
31.08	28.756	7.28074	3.25605	37.7962	19.7158	5		28.076	5.52475	2.47074	34.9359	21.2161	5
31.17	28.508	8.69774	3.88975	39.3077	17.7083	5		28.984	9.6472	4.31436	40.9626	17.0054	5
31.25	25.368	7.71715	3.45121	34.9501	15.7859	5		28.884	10.6052	4.74279	42.0521	15.7159	5
31.33	27.612	7.40874	3.31329	36.8112	18.4128	5		32.152	9.83029	4.39624	44.3579	19.9461	5
31.42	28.906	7.26167	3.24752	37.9226	19.8894	5		29.17	2.91581	1.30399	32.7905	25.5495	5
31.5	29.756	5.9134	2.64455	37.0985	22.4135	5		28.248	5.55351	2.48361	35.1436	21.3524	5
31.58	32.198	10.9698	4.90584	45.8188	18.5772	5		28.466	7.49018	3.34971	37.7663	19.1657	5
31.67	30.938	9.68268	4.33023	42.9606	18.9154	5		28.244	4.04957	1.81102	33.2722	23.2158	5
31.75	31.094	5.93037	2.65214	38.4575	23.7305	5		30.378	5.22707	2.33762	36.8683	23.8877	5
31.83	29.534	5.29518	2.36808	36.1088	22.9592	5		26.226	9.46461	4.2327	37.9779	14.4741	5
31.92	27.106	3.39378	1.51774	31.3199	22.8921	5		27.83	11.3465	5.07431	41.9185	13.7415	5
32	27.638	7.39505	3.30717	36.8202	18.4558	5		25.758	5.73334	2.56403	32.8769	18.6391	5
32.08	26.432	7.97206	3.56521	36.3306	16.5334	5		27.142	6.03341	2.69822	34.6335	19.6505	5
32.17	26.3	7.69449	3.44108	35.854	16.746	5		28.966	7.76421	3.47226	38.6065	19.3255	5
32.25	26.988	6.91469	3.09234	35.5737	18.4023	5		32.834	10.5653	4.72496	45.9526	19.7154	5
32.33	30.796	6.27937	2.80822	38.5929	22.9991	5		29.004	6.66007	2.97847	37.2736	20.7344	5
32.42	27.9	7.8842	3.52592	37.6895	18.1105	5		28.71	9.84401	4.40237	40.933	16.487	5
32.5	28.274	6.69605	2.99456	36.5882	19.9598	5		32.112	9.45288	4.22746	43.8493	20.3747	5
32.58	30.638	6.64887	2.97346	38.8937	22.3823	5		30.056	13.7645	6.15565	47.1468	12.9652	5
32.67	28.146	6.07492	2.71679	35.689	20.603	5		29.884	12.8803	5.76027	45.8771	13.8909	5
32.75	25.502	2.73685	1.22396	28.9003	22.1037	5		30.12	9.35807	4.18505	41.7396	18.5004	5
32.83	27.678	5.21165	2.33072	34.1491	21.2069	5		25.528	3.39102	1.51651	29.7385	21.3175	5
32.92	30.626	4.28674	1.91709	35.9487	25.3033	5		29.16	9.25917	4.14083	40.6568	17.6632	5
33	29.408	6.52667	2.91882	37.5119	21.3041	5		30.928	8.1735	3.6553	41.0767	20.7793	5
33.08	29.566	14.032	6.27532	46.9891	12.1429	5		29.9	10.5052	4.69805	42.9439	16.8561	5
33.17	26.638	11.5417	5.1616	40.9689	12.3071	5		29.604	12.2429	5.47519	44.8056	14.4024	5
33.25	25.882	5.05141	2.25906	32.1542	19.6098	5		27.868	9.7253	4.34928	39.9435	15.7925	5
33.33	26.97	3.08781	1.38091	30.804	23.136	5		26.032	6.75954	3.02296	34.4251	17.6389	5
33.42	28.09	6.029	2.69625	35.576	20.604	5		29.492	7.93162	3.54713	39.3404	19.6436	5
33.5	30.658	12.2195	5.46471	45.8305	15.4855	5		27.932	7.13434	3.19058	36.7905	19.0735	5
33.58	29.498	4.63858	2.07444	35.2576	23.7384	5		29.69	12.2494	5.4781	44.8996	14.4804	5
33.67	29.492	4.99101	2.23205	35.6892	23.2948	5		31.43	15.2089	6.80162	50.3143	12.5457	5
33.75	26.168	6.78774	3.03557	34.5961	17.7399	5		29.776	10.4294	4.66418	42.7258	16.8262	5
33.83	27.192	3.74818	1.67624	31.846	22.538	5		38.618	16.4006	7.33457	58.982	18.254	5
33.92	29.872	5.49782	2.4587	36.6984	23.0456	5		30.028	6.45675	2.88755	38.0451	22.0109	5
34	29.5	6.86217	3.06885	38.0205	20.9795	5		33.27	4.56798	2.04286	38.9419	27.5981	5
34.08	28.024	7.3265	3.27651	37.121	18.927	5		29.88	6.30022	2.81755	37.7028	22.0572	5
34.17	30.494	5.45419	2.43919	37.2663	23.7217	5		30.67	8.88444	3.97324	41.7015	19.6385	5
34.25	31.746	6.84026	3.05906	40.2393	23.2527	5		28.942	6.86391	3.06963	37.4647	20.4193	5
34.33	33.134	6.02834	2.69596	40.6192	25.6488	5		25.52	6.67708	2.98608	33.8107	17.2293	5
34.42	30.368	7.88544	3.52647	40.1591	20.5769	5		26.12	4.4338	1.98286	31.6253	20.6147	5
34.5	27.706	6.00934	2.68746	35.1676	20.2444	5		28.828	4.63815	2.07424	34.587	23.069	5
34.58	29.154	5.72549	2.56052	36.2631	22.0449	5		31.16	7.35794	3.29057	40.2961	22.0239	5
34.67	29.762	7.74374	3.46311	39.3771	20.1469	5		31.306	8.25943	3.69373	41.5614	21.0506	5
34.75	26.952	4.11929	1.8422	32.0668	21.8372	5		27.612	9.70636	4.34081	39.664	15.56	5
34.83	26.156	1.85959	0.831635	28.465	23.847	5		28.522	6.5091	2.91096	36.6041	20.4399	5
34.92	29.204	3.68896	1.64975	33.7844	24.6236	5		28.304	8.75581	3.91572	39.1758	17.4322	5
35	29.234	9.02928	4.03802	40.4453	18.0227	5		31.734	11.5692	5.17391	46.0991	17.3689	5
35.08	29.21	5.52422	2.47051	36.0692	22.3508	5		25.95	6.78128	3.03268	34.3701	17.5299	5
35.17	31.688	5.5096	2.46397	38.5291	24.8469	5		27.394	6.08614	2.7218	34.9509	19.8371	5
35.25	28.566	4.14525	1.85381	33.713	23.419	5		29.88	9.06312	4.05315	41.1333	18.6267	5
35.33	25.412	6.23172	2.78691	33.1497	17.6743	5		30.144	11.2519	5.032	44.1151	16.1729	5
35.42	27.776	11.7101	5.23693	42.3161	13.2359	5		28.94	7.72381	3.45419	38.5304	19.3496	5
35.5	29.152	7.93786	3.54992	39.0082	19.2958	5		24.06	4.88514	2.1847	30.1257	17.9943	5
35.58	30.26	7.14677	3.19613	39.1339	21.3861	5		25.928	5.23564	2.34145	32.4289	19.4271	5
35.67	32.058	6.76211	3.02411	40.4543	23.6617	5		26	8.99665	4.02342	37.1708	14.8292	5
35.75	29.134	6.79723	3.03981	37.5739	20.6941	5		27.374	7.80274	3.48949	37.0624	17.6856	5
35.83	29.532	9.45021	4.22626	41.266	17.798	5		30.038	14.0696	6.29211	47.5077	12.5683	5
35.92	27.406	5.80379	2.59553	34.6124	20.1996	5		31.226	11.2013	5.00937	45.1342	17.3178	5
36	29.13	9.0774	4.05954	40.4011	17.8589	5		26.462	10.8954	4.87256	39.9904	12.9336	5
36.08	29.696	9.32206	4.16895	41.2709	18.1211	5		24.65	8.56424	3.83004	35.2839	14.0161	5
36.17	28.898	11.4215	5.10783	43.0796	14.7164	5		26.788	9.90218	4.42839	39.0832	14.4928	5
36.25	28.5	9.92143	4.437	40.8191	16.1809	5		25.228	11.0342	4.93465	38.9288	11.5272	5
36.33	24.478	11.7702	5.26378	39.0926	9.8634	5		25.206	12.4389	5.56285	40.6509	9.76106	5
36.42	28.418	9.06545	4.05419	39.6742	17.1618	5		31.156	15.391	6.88307	50.2665	12.0455	5
36.5	28.26	8.46854	3.78724	38.7751	17.7449	5		27.236	8.25104	3.68998	37.481	16.991	5
36.58	27.674	6.02057	2.69248	35.1495	20.1985	5		28.36	8.72377	3.90139	39.192	17.528	5
36.67	27.39	9.02036	4.03403	38.5903	16.1897	5		26.756	11.6868	5.22648	41.267	12.245	5
36.75	27.51	9.40487	4.20598	39.1877	15.8323	5		29.4	17.8707	7.99204	51.5895	7.21054	5
36.83	26.692	10.2867	4.60034	39.4646	13.9194	5		25.618	8.13154	3.63653	35.7146	15.5214	5
36.92	26.634	9.46534	4.23303	38.3868	14.8812	5		27.502	12.1348	5.42686	42.5694	12.4346	5
37	25.69	11.1182	4.9722	39.495	11.885	5		26.884	11.2378	5.02568	40.8375	12.9305	5
37.08	25.93	12.0523	5.38996	40.8949	10.9651	5		25.666	10.1925	4.55824	38.3217	13.0103	5
37.17	28.596	9.12127	4.07916	39.9216	17.2704	5		27.014	9.46591	4.23328	38.7675	15.2605	5
37.25	28.69	7.0876	3.16967	37.4904	19.8896	5		30.698	7.94113	3.55138	40.5582	20.8378	5
37.33	27.192	8.25036	3.68968	37.4362	16.9478	5		22.92	8.07765	3.61244	32.9497	12.8903	5
37.42	26.432	9.36398	4.1877	38.0589	14.8051	5		23.362	10.1743	4.5501	35.9951	10.7289	5
37.5	25.468	9.19055	4.11014	36.8796	14.0564	5		25.696	12.4344	5.56083	41.1353	10.2567	5
37.58	26.714	9.59467	4.29087	38.6274	14.8006	5		24.706	9.72304	4.34828	36.7787	12.6333	5
37.67	25.498	8.09648	3.62085	35.5511	15.4449	5		23.296	9.2625	4.14231	34.7969	11.7951	5
37.75	26.13	6.90279	3.08702	34.7009	17.5591	5		21.69	7.75632	3.46873	31.3207	12.0593	5
37.83	25.012	6.39069	2.85801	32.9471	17.0769	5		19.38	5.01457	2.24259	25.6064	13.1536	5
37.92	25.634	8.31159	3.71706	35.9542	15.3138	5		22.548	7.13419	3.19051	31.4063	13.6897	5
38	24.232	7.00669	3.13349	32.932	15.532	5		21.378	7.2243	3.23081	30.3482	12.4078	5
38.08	27.904	8.59432	3.8435	38.5753	17.2327	5		20.758	8.22674	3.67911	30.9729	10.5431	5
38.17	29.332	8.00249	3.57882	39.2684	19.3956	5		20.286	7.21664	3.22738	29.2466	11.3254	5
38.25	26.892	10.1865	4.55556	39.5403	14.2437	5		25.548	7.80464	3.49034	35.2387	15.8573	5
38.33	25.558	5.96108	2.66588	32.9597	18.1563	5		21.222	8.11003	3.62691	31.2919	11.1521	5
38.42	25.668	7.76766	3.4738	35.3128	16.0232	5		23.692	10.3573	4.63194	36.5523	10.8317	5
38.5	26.592	8.73756	3.90755	37.4411	15.7429	5		20.828	8.81145	3.9406	31.7689	9.88713	5
38.58	25.662	5.23801	2.34251	32.1658	19.1582	5		23.948	12.4509	5.56821	39.4078	8.48817	5
38.67	26.91	8.24627	3.68785	37.1491	16.6709	5		22.488	8.81399	3.94174	33.432	11.544	5
38.75	25.556	7.66524	3.428	35.0737	16.0383	5		22.2	7.62406	3.40958	31.6665	12.7335	5
38.83	29.078	8.47069	3.78821	39.5958	18.5602	5		22.244	8.95567	4.0051	33.3639	11.1241	5
38.92	25.916	9.9404	4.44548	38.2586	13.5734	5		19.608	8.15287	3.64608	29.7311	9.48487	5
39	24.574	8.0314	3.59175	34.5463	14.6017	5		22.362	10.069	4.50298	34.8643	9.85973	5
39.08	25.758	9.43193	4.21809	37.4693	14.0467	5		20.18	8.37027	3.7433	30.5731	9.78693	5
39.17	24.578	10.3484	4.62793	37.4272	11.7288	5		20.842	8.09132	3.61855	30.8887	10.7953	5
39.25	26.222	10.0063	4.47497	38.6465	13.7975	5		23.268	9.91028	4.43201	35.5732	10.9628	5
39.33	25.546	8.53196	3.81561	36.1398	14.9522	5		25.322	4.63512	2.07289	31.0773	19.5667	5
39.42	27.184	9.03291	4.03964	38.3998	15.9682	5		28.542	12.5227	5.60033	44.091	12.993	5
39.5	26.128	5.50058	2.45993	32.9579	19.2981	5		24.292	6.82091	3.05041	32.7613	15.8227	5
39.58	26.754	4.77754	2.13658	32.6861	20.8219	5		25.94	12.1969	5.45464	41.0845	10.7955	5
39.67	26.606	5.85949	2.62045	33.8815	19.3305	5		24.99	12.6519	5.65809	40.6994	9.28063	5
39.75	24.578	9.07755	4.0596	35.8493	13.3067	5		24.096	9.79372	4.37989	36.2565	11.9355	5
39.83	22.264	10.9356	4.89053	35.8423	8.68572	5		24.346	10.4109	4.6559	37.2729	11.4191	5
39.92	23.392	9.40929	4.20796	35.0752	11.7088	5		26.126	12.8324	5.73882	42.0595	10.1925	5
40	21.698	7.77246	3.47595	31.3488	12.0472	5		27.404	13.3344	5.96332	43.9608	10.8472	5
40.08	20.702	8.13117	3.63637	30.7982	10.6058	5		24.382	12.2572	5.4816	39.6014	9.16263	5
40.17	23.764	9.19735	4.11318	35.184	12.344	5		24.744	11.6986	5.23176	39.2697	10.2183	5
40.25	22.264	6.38679	2.85626	30.1942	14.3338	5		20.888	7.13465	3.19071	29.7468	12.0292	5
40.33	22.088	6.8785	3.07616	30.6288	13.5472	5		21.916	9.34254	4.17811	33.5163	10.3157	5
40.42	23.434	7.59247	3.39546	32.8613	14.0067	5		22.33	9.9313	4.44141	34.6613	9.99866	5
40.5	25.196	8.67263	3.87852	35.9645	14.4275	5		25.866	12.0873	5.40561	40.8744	10.8576	5
40.58	24.538	9.21742	4.12216	35.9829	13.0931	5		25.524	8.71724	3.89847	36.3479	14.7001	5
40.67	24.304	10.3184	4.61452	37.116	11.492	5		22.306	6.987	3.12468	30.9815	13.6305	5
40.75	23.528	7.2918	3.26099	32.582	14.474	5		28.752	12.3767	5.53502	44.1197	13.3843	5
40.83	23.73	6.95251	3.10926	32.3627	15.0973	5		24.394	9.71608	4.34516	36.4581	12.3299	5
40.92	22.244	8.55367	3.82532	32.8648	11.6232	5		23.61	9.00226	4.02593	34.7878	12.4322	5
41	23.43	5.85639	2.61906	30.7017	16.1583	5		21.97	9.82758	4.39503	34.1725	9.76745	5
41.08	26.162	4.99947	2.23583	32.3697	19.9543	5		20.782	7.34297	3.28388	29.8995	11.6645	5
41.17	25.172	4.98944	2.23134	31.3672	18.9768	5		22.992	10.0142	4.4785	35.4263	10.5577	5
41.25	24.282	5.41636	2.42227	31.0073	17.5567	5		19.404	9.62057	4.30245	31.3495	7.45849	5
41.33	25.344	2.97544	1.33066	29.0385	21.6495	5		20.608	10.2252	4.57284	33.3042	7.91177	5
41.42	23.888	6.44069	2.88036	31.8852	15.8908	5		19.944	10.1106	4.5216	32.498	7.39003	5
41.5	23.506	5.03447	2.25148	29.7571	17.2549	5		21.78	8.35483	3.73639	32.1539	11.4061	5
41.58	25.226	6.15726	2.75361	32.8713	17.5807	5		21.004	8.89072	3.97605	32.0433	9.96471	5
41.67	23.388	6.29551	2.81544	31.2049	15.5711	5		23.186	9.09055	4.06542	34.4734	11.8986	5
41.75	24.226	9.16757	4.09986	35.609	12.843	5		23.074	7.76599	3.47306	32.7168	13.4312	5
41.83	20.854	9.62378	4.30389	32.8035	8.90449	5		29.384	8.01881	3.58612	39.3407	19.4273	5
41.92	22.34	13.569	6.06822	39.1881	5.49191	5		26.12	7.16229	3.20308	35.0132	17.2268	5
42	23.902	14.1958	6.34855	41.5284	6.27561	5		24.416	10.4663	4.68069	37.4117	11.4203	5
42.08	24.76	6.1901	2.7683	32.446	17.074	5		23.878	9.77641	4.37214	36.017	11.739	5
42.17	25.768	4.80029	2.14676	31.7284	19.8076	5		24.806	10.485	4.68906	37.8249	11.7871	5
42.25	25.31	7.54184	3.37281	34.6744	15.9456	5		24.502	9.73991	4.35582	36.5957	12.4083	5
42.33	22.516	7.30345	3.2662	31.5844	13.4476	5		22.28	8.79513	3.9333	33.2006	11.3594	5
42.42	23.098	4.23727	1.89497	28.3593	17.8367	5		23.704	10.7165	4.79257	37.0103	10.3977	5
42.5	25.576	7.59526	3.39671	35.0068	16.1452	5		23.14	7.60842	3.40259	32.5871	13.6929	5
42.58	23.746	7.1949	3.21766	32.6797	14.8123	5		22.902	10.1548	4.54134	35.5108	10.2932	5
42.67	22.878	5.91526	2.64539	30.2228	15.5332	5		23.584	10.1393	4.53443	36.1736	10.9944	5
42.75	24.752	7.39897	3.30892	33.939	15.565	5		23.034	9.15929	4.09616	34.4068	11.6612	5
42.83	23.044	7.40567	3.31192	32.2394	13.8486	5		23.78	10.3324	4.62081	36.6094	10.9506	5
42.92	24.134	3.69621	1.653	28.7235	19.5445	5		23.228	10.4361	4.66714	36.1861	10.2699	5
43	25.438	2.61765	1.17065	28.6882	22.1878	5		23.022	10.1084	4.52062	35.5733	10.4707	5
43.08	26.082	3.71487	1.66134	30.6946	21.4694	5		26.272	3.20014	1.43114	30.2455	22.2985	5
43.17	28.352	3.30763	1.47922	32.459	24.245	5		24.012	8.64744	3.86725	34.7492	13.2748	5
43.25	27.3	8.91275	3.9859	38.3666	16.2334	5		25.374	6.31498	2.82415	33.2151	17.5329	5
43.33	25.242	5.89859	2.63793	32.5661	17.9179	5		22.93	8.67768	3.88078	33.7048	12.1552	5
43.42	24.53	6.43679	2.87862	32.5223	16.5377	5		23.222	8.7611	3.91808	34.1003	12.3437	5
43.5	26.182	7.7871	3.4825	35.851	16.513	5		25.89	12.4953	5.58809	41.405	10.375	5
43.58	23.91	7.0919	3.1716	32.7158	15.1042	5		25.376	10.8218	4.83966	38.813	11.939	5
43.67	25.732	7.2679	3.2503	34.7563	16.7077	5		26.09	5.6067	2.50739	33.0516	19.1284	5
43.75	25.134	8.76218	3.91857	36.0137	14.2543	5		23.124	10.1344	4.53226	35.7076	10.5404	5
43.83	25.818	8.22674	3.67911	36.0328	15.6032	5		22.556	9.39092	4.19975	34.2164	10.8956	5
43.92	24.126	5.98581	2.67694	31.5584	16.6936	5		27.84	9.56005	4.27538	39.7104	15.9696	5
44	25.636	8.45152	3.77963	36.1299	15.1421	5		27.502	8.22703	3.67924	37.7172	17.2868	5
44.08	24.228	5.44539	2.43525	30.9893	17.4667	5		26.136	11.0107	4.92412	39.8075	12.4645	5
44.17	21.28	7.87545	3.52201	31.0587	11.5013	5		25.344	4.62156	2.06682	31.0824	19.6056	5
44.25	24.622	4.64033	2.07522	30.3837	18.8603	5		27.338	12.0911	5.4073	42.3511	12.3249	5
44.33	23.612	8.15218	3.64577	33.7343	13.4897	5		23.392	7.81525	3.49509	33.0959	13.6881	5
44.42	24.458	8.32383	3.72253	34.7934	14.1226	5		29.14	10.68	4.77623	42.4009	15.8791	5
44.5	27.776	6.78635	3.03495	36.2024	19.3496	5		27.284	8.81058	3.94021	38.2238	16.3442	5
44.58	27.072	6.70704	2.99948	35.3999	18.7441	5		20.874	8.58432	3.83903	31.5328	10.2152	5
44.67	26.888	3.06747	1.37181	30.6968	23.0792	5		23.128	7.39464	3.30699	32.3097	13.9463	5
44.75	25.172	5.1323	2.29524	31.5446	18.7994	5		25.52	12.2938	5.49797	40.7848	10.2552	5
44.83	24.77	7.20972	3.22429	33.7221	15.8179	5		22.446	3.79327	1.6964	27.156	17.736	5
44.92	22.734	7.28254	3.25685	31.7765	13.6915	5		23.794	4.63083	2.07097	29.5439	18.0441	5
45	23.54	7.44961	3.33157	32.7899	14.2901	5		22.224	5.51809	2.46777	29.0756	15.3724	5
45.08	24.422	8.07026	3.60913	34.4426	14.4014	5		24.568	8.45664	3.78192	35.0683	14.0677	5
45.17	23.698	6.91369	3.0919	32.2825	15.1135	5		25.274	5.70795	2.55267	32.3614	18.1866	5
45.25	25.822	7.66307	3.42703	35.337	16.307	5		21.926	8.04381	3.5973	31.9137	11.9383	5
45.33	29.02	6.72515	3.00758	37.3704	20.6696	5		23.212	6.7007	2.99665	31.532	14.892	5
45.42	27.134	8.57518	3.83493	37.7815	16.4865	5		23.336	7.05419	3.15473	32.0949	14.5771	5
45.5	25.332	4.48597	2.00619	30.9021	19.7619	5		21.228	6.9086	3.08962	29.8062	12.6498	5
45.58	23.884	5.69601	2.54733	30.9565	16.8115	5		22.6	7.0967	3.17374	31.4117	13.7883	5
45.67	25.158	8.25408	3.69134	35.4068	14.9092	5		24.818	5.7491	2.57107	31.9564	17.6796	5
45.75	27.532	8.00852	3.58152	37.4759	17.5881	5		22.034	6.56259	2.93488	30.1825	13.8855	5
45.83	26.846	6.71965	3.00512	35.1895	18.5025	5		24.486	9.33693	4.1756	36.0793	12.8927	5
45.92	25.104	6.98904	3.1256	33.782	16.426	5		28.65	12.8545	5.74869	44.6109	12.6891	5
46	25.062	8.45342	3.78049	35.5583	14.5657	5		28.222	9.48486	4.24176	39.999	16.445	5
46.08	24.782	5.73031	2.56267	31.8971	17.6669	5		25.536	7.17716	3.20972	34.4476	16.6244	5
46.17	26.336	4.98707	2.23028	32.5283	20.1437	5		28.632	9.00516	4.02723	39.8134	17.4506	5
46.25	26.546	3.30613	1.47855	30.6511	22.4409	5		27.38	10.3774	4.64094	40.2653	14.4947	5
46.33	24.38	5.87782	2.62864	31.6783	17.0817	5		29.366	13.2109	5.9081	45.7695	12.9625	5
46.42	23.838	5.24783	2.3469	30.354	17.322	5		26.994	10.5548	4.72024	40.0995	13.8885	5
46.5	24.936	7.39395	3.30667	34.1168	15.7552	5		25.61	9.65519	4.31793	37.5985	13.6215	5
46.58	24.152	4.96483	2.22034	30.3167	17.9873	5		29.52	13.4761	6.02671	46.2528	12.7872	5
46.67	26.858	5.35011	2.39264	33.501	20.215	5		29.358	11.6591	5.21413	43.8347	14.8813	5
46.75	25.836	8.15545	3.64723	35.9623	15.7097	5		25.82	9.02626	4.03667	37.0276	14.6124	5
46.83	26.964	4.80281	2.14788	32.9275	21.0005	5		25.376	7.78798	3.48289	35.0461	15.7059	5
46.92	28.856	5.65101	2.52721	35.8727	21.8393	5		30.372	13.9737	6.24921	47.7226	13.0214	5
47	25.434	5.33971	2.38799	32.0641	18.8039	5		24.114	5.55253	2.48317	31.0084	17.2196	5
47.08	26.256	3.33714	1.49241	30.3996	22.1124	5		22.664	5.89878	2.63802	29.9883	15.3397	5
47.17	30.676	7.06576	3.1599	39.4493	21.9027	5		22.674	5.44775	2.43631	29.4383	15.9097	5
47.25	30.722	5.49427	2.45711	37.544	23.9	5		28.208	13.2805	5.9392	44.6979	11.7181	5
47.33	30.088	8.14843	3.64409	40.2056	19.9704	5		27.002	6.50884	2.91084	35.0838	18.9202	5
47.42	26.174	9.87217	4.41497	38.4319	13.9161	5		29.332	8.66927	3.87701	40.0963	18.5677	5
47.5	27.78	9.30902	4.16312	39.3387	16.2213	5		30.836	11.6143	5.19407	45.2571	16.4149	5
47.58	25.412	8.50965	3.80563	35.9781	14.8459	5		28.086	10.3952	4.6489	40.9934	15.1786	5
47.67	27.284	6.16234	2.75588	34.9356	19.6324	5		29.798	11.0432	4.93866	43.5099	16.0861	5
47.75	22.5	9.28624	4.15293	34.0304	10.9696	5		27.936	8.24395	3.68681	38.1722	17.6998	5
47.83	22.562	7.66052	3.42589	32.0738	13.0502	5		27.23	11.9896	5.36193	42.1171	12.3429	5
47.92	23.004	4.37218	1.9553	28.4328	17.5752	5		27.798	12.4173	5.5532	43.2161	12.3799	5

## Sheet: Supplementary Figure 1E
			Baseline							+ Tamoxifen						Heart rate day	Control	Stim1 smKO + vehicle		Heart rate night	Control	Stim1 smKO + vehicle
Time (h)	Mean	SD	SEM	Upper limit	Lower limit	N		Mean	SD	SEM	Upper limit	Lower limit	N			Mouse 1	553.723	503.436		Mouse 1	627.424	625.509
0	600.882	141.136	63.1181	776.126	425.638	5		610.046	130.277	58.2616	771.806	448.286	5			Mouse 2	483.778	473.269		Mouse 2	556.875	540.815
0.08	585.67	143.369	64.1166	763.686	407.654	5		620.044	71.6247	32.0315	708.978	531.11	5			Mouse 3	496.998	488.291		Mouse 3	585.561	578.187
0.17	527.464	116.315	52.0176	671.888	383.04	5		644.078	82.7774	37.0192	746.86	541.296	5			Mouse 4	469.851	453.207		Mouse 4	537.129	506.853
0.25	567.834	124.859	55.8386	722.867	412.801	5		613.15	64.8333	28.9943	693.651	532.649	5			Mouse 5	540.924	603.442		Mouse 5	634.945	660.232
0.33	563.606	140.87	62.9988	738.519	388.693	5		561.662	110.19	49.2786	698.481	424.843	5
0.42	529.258	126.451	56.5505	686.267	372.249	5		546.444	84.8355	37.9396	651.781	441.107	5		Paired t test				Paired t test
0.5	537.7	96.5697	43.1873	657.607	417.793	5		583.528	79.8747	35.7211	682.706	484.35	5		P value	0.8102			P value	0.5451
0.58	574.032	70.0947	31.3473	661.066	486.998	5		598.264	67.2604	30.0798	681.779	514.749	5		Significantly different (P < 0.05)?	No			Significantly different (P < 0.05)?	No
0.67	594.626	98.2501	43.9388	716.62	472.632	5		569.116	102.583	45.8765	696.49	441.742	5		One- or two-tailed P value?	Two-tailed			One- or two-tailed P value?	Two-tailed
0.75	531.376	85.8509	38.3937	637.974	424.778	5		535.022	90.0496	40.2714	646.833	423.211	5
0.83	552.638	50.2456	22.4705	615.026	490.25	5		558.312	108.134	48.3591	692.578	424.046	5		Mean of differences (B - A)	-4.726			Mean of differences (B - A)	-6.068
0.92	555.552	82.3074	36.809	657.75	453.354	5		516.61	113.271	50.6564	657.255	375.965	5		SD of differences	41.2			SD of differences	20.54
1	593.94	112.229	50.1902	733.29	454.59	5		541.496	110.297	49.3263	678.448	404.544	5		SEM of differences	18.42			SEM of differences	9.187
1.08	643.112	122.49	54.7791	795.203	491.021	5		602.454	151.755	67.8667	790.882	414.026	5		95% confidence interval	-55.88 to 46.43			95% confidence interval	-31.57 to 19.44
1.17	669.174	70.8619	31.6904	757.161	581.187	5		648.662	98.9123	44.2349	771.478	525.846	5
1.25	640.428	97.9152	43.789	762.006	518.85	5		684.714	30.0496	13.4386	722.025	647.403	5
1.33	658.382	96.8584	43.3164	778.648	538.116	5		657.99	50.3625	22.5228	720.523	595.457	5
1.42	646.316	57.9274	25.9059	718.242	574.39	5		661.548	74.9846	33.5341	754.654	568.442	5
1.5	635.45	48.6847	21.7724	695.9	575	5		617.912	71.9501	32.1771	707.25	528.574	5
1.58	644.514	45.6862	20.4315	701.241	587.787	5		621.692	59.159	26.4567	695.148	548.236	5
1.67	648.326	71.0992	31.7965	736.607	560.045	5		651.138	55.925	25.0104	720.578	581.698	5
1.75	637.988	68.791	30.7643	723.403	552.573	5		664.462	86.8651	38.8473	772.319	556.605	5
1.83	666.696	38.0061	16.9969	713.887	619.505	5		631.056	69.5217	31.091	717.379	544.733	5
1.92	602.606	54.5026	24.3743	670.28	534.932	5		642.93	66.0701	29.5474	724.967	560.893	5
2	593.852	44.8952	20.0777	649.597	538.107	5		642.366	68.8476	30.7896	727.852	556.88	5
2.08	600.138	61.6047	27.5505	676.63	523.646	5		629.662	73.2278	32.7485	720.586	538.738	5
2.17	635.758	64.804	28.9812	716.223	555.293	5		611.006	48.0581	21.4922	670.678	551.334	5
2.25	591.706	75.3502	33.6976	685.266	498.146	5		597.42	56.3162	25.1854	667.346	527.494	5
2.33	603.248	59.0084	26.3893	676.517	529.979	5		584.254	66.2633	29.6338	666.531	501.977	5
2.42	575.278	48.5627	21.7179	635.577	514.979	5		609.934	68.0768	30.4449	694.463	525.405	5
2.5	631.646	31.2086	13.9569	670.397	592.895	5		595.648	63.4548	28.3778	674.437	516.859	5
2.58	619.848	85.7237	38.3368	726.288	513.408	5		600.074	75.8957	33.9416	694.311	505.837	5
2.67	560.352	64.9823	29.061	641.038	479.666	5		598.612	102.2	45.7054	725.511	471.713	5
2.75	568.75	97.4012	43.5592	689.69	447.81	5		602.122	84.4849	37.7828	707.024	497.22	5
2.83	552.06	119.966	53.6504	701.017	403.103	5		577.786	117.417	52.5105	723.579	431.993	5
2.92	547.746	147.639	66.0262	731.064	364.428	5		599.116	115.904	51.8339	743.03	455.202	5
3	522.326	139.824	62.5314	695.941	348.711	5		599.542	85.1117	38.0631	705.222	493.862	5
3.08	559.558	118.308	52.9088	706.456	412.66	5		577.212	90.3498	40.4057	689.396	465.028	5
3.17	512.438	131.091	58.6258	675.209	349.667	5		597.926	141.79	63.4103	773.981	421.871	5
3.25	536.316	151.559	67.7791	724.501	348.131	5		572.984	160.135	71.6146	771.818	374.15	5
3.33	562.096	143.154	64.0206	739.846	384.346	5		568.796	170.568	76.2805	780.585	357.007	5
3.42	626.12	118.695	53.0822	773.5	478.74	5		575.082	145.418	65.0328	755.642	394.522	5
3.5	631.298	123.788	55.3597	785.001	477.595	5		594.542	131.966	59.0172	758.4	430.684	5
3.58	647.222	44.7718	20.0226	702.814	591.63	5		599.588	135.181	60.4546	767.437	431.739	5
3.67	614.5	120.223	53.7655	763.777	465.223	5		590.3	124.421	55.6427	744.789	435.811	5
3.75	593.144	84.4854	37.783	698.047	488.241	5		620.186	139.118	62.2154	792.924	447.448	5
3.83	571.27	115.981	51.8681	715.279	427.261	5		593.972	122.175	54.6383	745.672	442.272	5
3.92	596.172	104.895	46.9105	726.416	465.928	5		623.204	99.0572	44.2997	746.2	500.208	5
4	598.872	56.2756	25.1672	668.747	528.997	5		618.946	52.9854	23.6958	684.736	553.156	5
4.08	634.568	75.5779	33.7994	728.41	540.726	5		642.164	52.1771	23.3343	706.95	577.378	5
4.17	631.556	67.0663	29.993	714.83	548.282	5		616.89	72.7021	32.5134	707.162	526.618	5
4.25	630.356	61.0986	27.3241	706.22	554.492	5		600.59	81.99	36.6671	702.394	498.786	5
4.33	578.886	63.5597	28.4248	657.806	499.966	5		581.758	71.5251	31.987	670.568	492.948	5
4.42	606.322	32.8065	14.6715	647.057	565.587	5		567.72	101.425	45.3584	693.655	441.785	5
4.5	588.778	45.0101	20.1291	644.665	532.891	5		596.166	86.0772	38.4949	703.045	489.287	5
4.58	595.138	47.641	21.3057	654.292	535.984	5		594.832	128.996	57.689	755.002	434.662	5
4.67	578.22	114.441	51.1797	720.318	436.122	5		588.418	100.801	45.0798	713.58	463.256	5
4.75	588.57	115.014	51.4357	731.378	445.762	5		609.808	88.1035	39.4011	719.203	500.413	5
4.83	611.79	114.073	51.0151	753.431	470.149	5		613.642	125.694	56.2122	769.712	457.572	5
4.92	608.796	146.245	65.4029	790.383	427.209	5		583.854	142.255	63.6186	760.487	407.221	5
5	587.868	173.789	77.7209	803.656	372.08	5		646.092	19.9553	8.92426	670.87	621.314	5
5.08	577.196	163.007	72.899	779.596	374.796	5		612.32	87.8489	39.2872	721.399	503.241	5
5.17	567.546	123.95	55.4323	721.451	413.641	5		529.28	114.172	51.0591	671.043	387.517	5
5.25	557.314	122.64	54.8462	709.591	405.037	5		563.7	81.8042	36.584	665.273	462.127	5
5.33	557.082	109.948	49.17	693.6	420.564	5		593.368	120.496	53.8874	742.984	443.752	5
5.42	606.672	124.108	55.5029	760.773	452.571	5		551.444	117.398	52.5018	697.212	405.676	5
5.5	638.686	64.5899	28.8855	718.885	558.487	5		539.17	124.1	55.4994	693.261	385.079	5
5.58	564.86	131.504	58.8102	728.143	401.577	5		509.95	86.8965	38.8613	617.846	402.054	5
5.67	602.034	76.4669	34.197	696.98	507.088	5		511.924	65.6185	29.3455	593.4	430.448	5
5.75	567.208	71.5738	32.0088	656.079	478.337	5		510.614	112.559	50.3378	650.374	370.854	5
5.83	611.782	87.107	38.9555	719.94	503.624	5		514.05	143.151	64.019	691.795	336.305	5
5.92	604.782	42.4157	18.9689	657.448	552.116	5		535.36	118.62	53.0483	682.646	388.074	5
6	639.59	39.916	17.851	689.152	590.028	5		530.278	109.564	48.9984	666.319	394.237	5
6.08	628.144	30.8654	13.8034	666.468	589.82	5		555.74	94.3914	42.2131	672.942	438.538	5
6.17	604.662	80.4516	35.9791	704.556	504.768	5		550.476	72.6602	32.4946	640.696	460.256	5
6.25	586.57	90.2404	40.3567	698.618	474.522	5		546.536	58.9963	26.384	619.79	473.282	5
6.33	619.624	58.2044	26.0298	691.894	547.354	5		565.68	68.6548	30.7034	650.926	480.434	5
6.42	563.774	54.2907	24.2796	631.185	496.363	5		600.166	92.2407	41.2513	714.698	485.634	5
6.5	593.222	54.861	24.5346	661.341	525.103	5		570.762	105.637	47.2423	701.928	439.596	5
6.58	583.832	80.5289	36.0136	683.822	483.842	5		612.84	82.8338	37.0444	715.692	509.988	5
6.67	555.74	101.595	45.4347	681.887	429.593	5		643.216	76.6844	34.2943	738.432	548	5
6.75	576.396	122.531	54.7974	728.538	424.254	5		571.244	120.716	53.9859	721.133	421.355	5
6.83	551.392	104.215	46.6066	680.793	421.991	5		632.524	74.6201	33.3711	725.177	539.871	5
6.92	542.808	62.7216	28.0499	620.687	464.929	5		585.592	99.036	44.2902	708.561	462.623	5
7	543.916	120.619	53.9425	693.684	394.148	5		550.958	116.512	52.106	695.627	406.289	5
7.08	478.078	97.703	43.6941	599.392	356.764	5		603.66	96.2349	43.0376	723.151	484.169	5
7.17	478.734	113.592	50.7999	619.777	337.691	5		529.218	133.291	59.6097	694.721	363.715	5
7.25	529.678	88.7409	39.6861	639.864	419.492	5		544.464	96.6839	43.2383	664.513	424.415	5
7.33	484.914	45.7736	20.4706	541.749	428.079	5		531.91	87.0284	38.9203	639.97	423.85	5
7.42	546.458	118.547	53.0158	693.653	399.263	5		503.984	64.5049	28.8474	584.077	423.891	5
7.5	593.528	84.7098	37.8834	698.709	488.347	5		511.554	81.4619	36.4309	612.702	410.406	5
7.58	522.676	107.019	47.8602	655.557	389.795	5		528.87	76.5222	34.2218	623.885	433.855	5
7.67	580.982	124.709	55.7716	735.829	426.135	5		531.046	100.155	44.7905	655.404	406.688	5
7.75	568.886	106.502	47.629	701.125	436.647	5		507.4	67.3044	30.0995	590.969	423.831	5
7.83	513.47	54.8615	24.5348	581.59	445.35	5		489.022	64.8448	28.9995	569.537	408.507	5
7.92	568.86	110.47	49.4038	706.027	431.693	5		532.118	22.9837	10.2786	560.656	503.58	5
8	550.388	129.076	57.7245	710.657	390.119	5		570.446	110.239	49.3002	707.325	433.567	5
8.08	586.966	119.457	53.4227	735.291	438.641	5		547.412	67.4638	30.1707	631.179	463.645	5
8.17	591.58	62.8528	28.1086	669.622	513.538	5		506.57	136.171	60.8976	675.649	337.491	5
8.25	552.064	86.6864	38.7673	659.699	444.429	5		550.996	161	72.0014	750.904	351.088	5
8.33	567.204	111.488	49.859	705.635	428.773	5		572.964	144.576	64.6565	752.479	393.449	5
8.42	506.892	82.622	36.9497	609.481	404.303	5		619.944	140.58	62.8693	794.497	445.391	5
8.5	540.178	129.287	57.8189	700.709	379.647	5		587.904	111.493	49.861	726.34	449.468	5
8.58	523.208	123.703	55.3218	676.806	369.61	5		568.212	55.8715	24.9865	637.586	498.838	5
8.67	629.674	85.0879	38.0525	735.325	524.023	5		566.286	105.416	47.1435	697.177	435.395	5
8.75	537.046	110.54	49.435	674.3	399.792	5		522.352	83.1263	37.1752	625.567	419.137	5
8.83	574.292	73.5852	32.9083	665.66	482.924	5		510.932	101.222	45.268	636.616	385.248	5
8.92	648.65	77.0069	34.4385	744.267	553.033	5		529.522	57.4358	25.6861	600.838	458.206	5
9	577.036	125.2	55.9909	732.492	421.58	5		598.946	60.8425	27.2096	674.492	523.4	5
9.08	588.232	107.557	48.1009	721.782	454.682	5		514.642	71.2032	31.843	603.052	426.232	5
9.17	575.928	105.112	47.0074	706.441	445.415	5		573.69	114.798	51.3392	716.231	431.149	5
9.25	580.156	87.2443	39.0169	688.484	471.828	5		547.226	162.232	72.5523	748.663	345.789	5
9.33	604.07	93.1946	41.6779	719.786	488.354	5		568.47	113.58	50.7947	709.499	427.441	5
9.42	515.166	80.0845	35.8149	614.604	415.728	5		621.442	111.542	49.8832	759.94	482.944	5
9.5	552.222	142.416	63.6903	729.055	375.389	5		592.352	148.201	66.2775	776.368	408.336	5
9.58	535.694	127.634	57.0796	694.172	377.216	5		588.694	133.856	59.8622	754.898	422.49	5
9.67	591.486	132.733	59.3602	756.296	426.676	5		622.03	60.0196	26.8416	696.554	547.506	5
9.75	550.764	137.103	61.3143	721	380.528	5		572.858	84.5263	37.8013	677.811	467.905	5
9.83	590.634	87.8082	39.269	699.662	481.606	5		564.982	105.321	47.1012	695.756	434.208	5
9.92	626.734	80.1477	35.8432	726.251	527.217	5		582.686	88.8796	39.7482	693.045	472.327	5
10	574.396	79.1828	35.4116	672.714	476.078	5		565.448	123.534	55.2463	718.836	412.06	5
10.08	568.514	60.0485	26.8545	643.074	493.954	5		534.264	89.8719	40.1919	645.855	422.673	5
10.17	512.384	90.5858	40.5112	624.861	399.907	5		595.882	130.857	58.521	758.362	433.402	5
10.25	575.188	97.721	43.7021	696.525	453.851	5		628.814	103.371	46.2288	757.166	500.462	5
10.33	611.12	52.7943	23.6103	676.673	545.567	5		557.132	121.668	54.4117	708.203	406.061	5
10.42	627.28	55.3011	24.7314	695.945	558.615	5		576.934	118.968	53.2041	724.652	429.216	5
10.5	644.816	51.3372	22.9587	708.56	581.072	5		606.754	118.046	52.792	753.328	460.18	5
10.58	647.676	74.0543	33.1181	739.627	555.725	5		583.356	131.143	58.6491	746.192	420.52	5
10.67	674.846	72.2191	32.2974	764.518	585.174	5		590.31	119.464	53.4259	738.644	441.976	5
10.75	599.466	106.178	47.4842	731.303	467.629	5		561.248	125.168	55.9769	716.665	405.831	5
10.83	565.096	98.7058	44.1426	687.655	442.537	5		582.01	136.585	61.0826	751.602	412.418	5
10.92	607.036	89.3926	39.9776	718.032	496.04	5		542.908	102.751	45.9515	670.49	415.326	5
11	592.646	93.6355	41.8751	708.91	476.382	5		529.486	116.962	52.3071	674.714	384.258	5
11.08	557.57	119.927	53.633	706.479	408.661	5		558.658	103.565	46.3156	687.251	430.065	5
11.17	604.584	79.0642	35.3586	702.755	506.413	5		627.832	44.4365	19.8726	683.007	572.657	5
11.25	563.876	123.833	55.3799	717.635	410.117	5		620.816	104.099	46.5545	750.072	491.56	5
11.33	550.474	87.0173	38.9153	658.52	442.428	5		637.694	76.553	34.2356	732.747	542.641	5
11.42	571.116	116.965	52.3085	716.348	425.884	5		610.222	67.9064	30.3687	694.539	525.905	5
11.5	566.824	104.861	46.8953	697.026	436.622	5		596.248	93.193	41.6772	711.962	480.534	5
11.58	585.416	101.511	45.3971	711.459	459.373	5		594.148	123.155	55.0767	747.065	441.231	5
11.67	627.628	69.7457	31.1912	714.229	541.027	5		583.492	126.344	56.5026	740.368	426.616	5
11.75	664.146	36.635	16.3837	709.634	618.658	5		563.304	129.305	57.8271	723.858	402.75	5
11.83	628.77	101.249	45.28	754.487	503.053	5		574.978	135.58	60.633	743.322	406.634	5
11.92	619.836	97.5849	43.6413	741.004	498.668	5		596.954	122.359	54.7207	748.883	445.025	5
12	610.436	36.5078	16.3268	655.766	565.106	5		609.506	66.0947	29.5584	691.573	527.439	5
12.08	612.782	97.2508	43.4919	733.535	492.029	5		613.676	97.6313	43.662	734.901	492.451	5
12.17	610.674	39.6538	17.7337	659.911	561.437	5		609.134	43.8802	19.6238	663.618	554.65	5
12.25	592.48	92.5605	41.3943	707.409	477.551	5		598.238	90.6431	40.5368	710.786	485.69	5
12.33	604.782	49.0045	21.9155	665.629	543.935	5		574.912	41.0396	18.3534	625.869	523.955	5
12.42	605.42	85.5039	38.2385	711.587	499.253	5		512.832	67.8883	30.3606	597.126	428.538	5
12.5	552.93	112.545	50.3315	692.673	413.187	5		475.906	79.5264	35.5653	574.651	377.161	5
12.58	617.984	64.0897	28.6618	697.562	538.406	5		466.012	94.3582	42.1983	583.173	348.851	5
12.67	570.074	121.913	54.5214	721.45	418.698	5		483.032	126.385	56.5211	639.96	326.104	5
12.75	579.054	89.3463	39.9569	689.992	468.116	5		507.948	114.502	51.2068	650.121	365.775	5
12.83	530.062	100.149	44.7878	654.413	405.711	5		488.052	108.643	48.5868	622.951	353.153	5
12.92	507.316	44.7117	19.9957	562.833	451.799	5		465.722	93.6382	41.8763	581.989	349.455	5
13	514.67	39.0438	17.4609	563.149	466.191	5		483.08	49.0719	21.9456	544.011	422.149	5
13.08	529.906	95.5547	42.7333	648.553	411.259	5		481.94	43.7521	19.5665	536.265	427.615	5
13.17	554.99	122.1	54.6046	706.597	403.383	5		581.66	65.1604	29.1406	662.567	500.753	5
13.25	514.646	111.64	49.9268	653.265	376.027	5		487.052	86.4145	38.6457	594.35	379.754	5
13.33	508.176	92.137	41.2049	622.579	393.773	5		504.916	74.0009	33.0942	596.8	413.032	5
13.42	512.062	83.5059	37.345	615.748	408.376	5		491.096	73.8395	33.022	582.78	399.412	5
13.5	492.592	43.6897	19.5386	546.84	438.344	5		469.17	94.3817	42.2088	586.36	351.98	5
13.58	486.284	91.8185	41.0625	600.292	372.276	5		497.538	96.0511	42.9554	616.801	378.275	5
13.67	456.322	66.0659	29.5456	538.354	374.29	5		467.622	83.2083	37.2119	570.939	364.305	5
13.75	481.062	75.4663	33.7495	574.766	387.358	5		535.836	114.079	51.0175	677.483	394.189	5
13.83	474.222	103.782	46.4126	603.084	345.36	5		533.208	92.2659	41.2625	647.771	418.645	5
13.92	486.356	82.2979	36.8047	588.542	384.17	5		527.58	134.629	60.2079	694.744	360.416	5
14	491.32	51.9256	23.2218	555.794	426.846	5		507.722	74.5382	33.3345	600.273	415.171	5
14.08	520.388	89.4844	40.0186	631.498	409.278	5		568.32	104.618	46.7867	698.221	438.419	5
14.17	514.492	83.7963	37.4749	618.539	410.445	5		513.626	113.344	50.6888	654.361	372.891	5
14.25	538.138	100.827	45.0912	663.331	412.945	5		507.764	130.504	58.3633	669.806	345.722	5
14.33	459.094	44.3363	19.8278	514.145	404.043	5		499.082	108.173	48.3765	633.397	364.767	5
14.42	456.984	69.8637	31.244	543.731	370.237	5		488.95	96.6843	43.2385	608.999	368.901	5
14.5	485.488	63.296	28.3068	564.08	406.896	5		524.338	81.3534	36.3823	625.352	423.324	5
14.58	497.424	47.7132	21.338	556.668	438.18	5		458.686	100.869	45.1101	583.932	333.44	5
14.67	450.13	66.278	29.6404	532.425	367.835	5		489.502	87.7691	39.2515	598.482	380.522	5
14.75	487.482	68.6753	30.7125	572.754	402.21	5		479.036	82.5057	36.8977	581.48	376.592	5
14.83	517.01	48.0861	21.5047	576.717	457.303	5		486.18	54.5247	24.3842	553.881	418.479	5
14.92	488.404	70.977	31.7419	576.534	400.274	5		480.938	67.8328	30.3357	565.164	396.712	5
15	543.124	60.707	27.149	618.502	467.746	5		477.38	68.283	30.5371	562.165	392.595	5
15.08	467.136	52.0953	23.2977	531.821	402.451	5		479.54	56.4564	25.2481	549.64	409.44	5
15.17	494.248	95.0846	42.5231	612.311	376.185	5		482.898	52.4007	23.4343	547.962	417.834	5
15.25	495.87	53.4057	23.8838	562.182	429.558	5		490.89	69.1359	30.9185	576.734	405.046	5
15.33	494.64	55.0141	24.6031	562.949	426.331	5		473.56	83.474	37.3307	577.207	369.913	5
15.42	484.032	78.6116	35.1562	581.641	386.423	5		460.648	77.0439	34.4551	556.311	364.985	5
15.5	483.31	91.4289	40.8883	596.834	369.786	5		492.542	77.5737	34.692	588.862	396.222	5
15.58	471.086	39.1972	17.5295	519.756	422.416	5		464.974	68.2135	30.506	549.672	380.276	5
15.67	493.664	67.3157	30.1045	577.247	410.081	5		496.286	77.6841	34.7414	592.744	399.828	5
15.75	520.378	101.418	45.3555	646.305	394.451	5		480.546	59.288	26.5144	554.162	406.93	5
15.83	479.25	91.8067	41.0572	593.243	365.257	5		466.48	26.3891	11.8015	499.246	433.714	5
15.92	513.054	79.2812	35.4556	611.495	414.613	5		484.614	97.3875	43.553	605.537	363.691	5
16	568.908	155.38	69.4881	761.838	375.978	5		565.044	91.7586	41.0357	678.977	451.111	5
16.08	520.69	66.277	29.64	602.984	438.396	5		540.844	122.094	54.6019	692.443	389.245	5
16.17	498.438	44.6033	19.9472	553.82	443.056	5		543.182	100.505	44.947	667.975	418.389	5
16.25	507.558	88.4548	39.5582	617.389	397.727	5		549.954	70.1129	31.3555	637.011	462.897	5
16.33	508.59	81.3645	36.3873	609.617	407.563	5		555.386	78.009	34.8867	652.247	458.525	5
16.42	513.968	46.83	20.943	572.115	455.821	5		498.746	83.7293	37.4449	602.71	394.782	5
16.5	477.934	62.2923	27.858	555.28	400.588	5		465.14	84.1603	37.6377	569.639	360.641	5
16.58	459.77	49.7638	22.255	521.56	397.98	5		465.174	83.3108	37.2577	568.618	361.73	5
16.67	460.154	66.4125	29.7006	542.616	377.692	5		457.062	64.641	28.9083	537.324	376.8	5
16.75	518.196	51.7421	23.1398	582.442	453.95	5		474.658	74.6714	33.3941	567.375	381.941	5
16.83	522.692	46.8255	20.941	580.833	464.551	5		485.658	46.5278	20.8079	543.43	427.886	5
16.92	544.246	64.1693	28.6974	623.923	464.569	5		480.942	60.1413	26.896	555.617	406.267	5
17	492.548	92.5711	41.399	607.49	377.606	5		485.152	51.549	23.0534	549.159	421.145	5
17.08	507.014	119.055	53.243	654.84	359.188	5		452.1	75.0508	33.5638	545.288	358.912	5
17.17	521.808	92.9343	41.5615	637.201	406.415	5		438.928	77.0958	34.4783	534.655	343.201	5
17.25	500.642	107.653	48.144	634.311	366.973	5		472.526	110.932	49.6103	610.266	334.786	5
17.33	503.486	98.5215	44.0602	625.817	381.155	5		468.772	128.279	57.3681	628.051	309.493	5
17.42	471.938	55.0537	24.6207	540.296	403.58	5		480.78	98.4424	44.0248	603.012	358.548	5
17.5	448.342	51.9492	23.2324	512.846	383.838	5		491.342	67.6283	30.2443	575.314	407.37	5
17.58	488.026	68.8491	30.7902	573.513	402.539	5		483.168	94.4554	42.2418	600.45	365.886	5
17.67	481.216	102.453	45.8184	608.428	354.004	5		497.586	80.5685	36.0313	597.625	397.547	5
17.75	511.498	110.381	49.364	648.554	374.442	5		523.834	76.6437	34.2761	619	428.668	5
17.83	466.626	63.5434	28.4175	545.525	387.727	5		512.102	64.1978	28.7101	591.814	432.39	5
17.92	490.042	67.7994	30.3208	574.226	405.858	5		481.848	51.2928	22.9388	545.536	418.16	5
18	484.532	54.2744	24.2723	551.923	417.141	5		546.808	28.981	12.9607	582.793	510.823	5
18.08	468.88	62.2782	27.8517	546.209	391.551	5		478.326	58.1898	26.0233	550.578	406.074	5
18.17	520.842	90.0301	40.2627	632.629	409.055	5		508.888	105.995	47.4026	640.499	377.277	5
18.25	498.258	51.5181	23.0396	562.226	434.29	5		460.608	95.127	42.5421	578.724	342.492	5
18.33	526.336	98.9829	44.2665	649.24	403.432	5		509.678	73.2747	32.7694	600.661	418.695	5
18.42	485.634	59.3495	26.5419	559.326	411.942	5		454.974	76.3898	34.1626	549.825	360.123	5
18.5	534.956	33.2484	14.8691	576.239	493.673	5		430.568	99.7781	44.6221	554.459	306.677	5
18.58	514.152	73.5019	32.8711	605.417	422.887	5		429.85	70.2126	31.4	517.03	342.67	5
18.67	504.44	60.5901	27.0967	579.673	429.207	5		525.46	66.0654	29.5453	607.491	443.429	5
18.75	478.182	59.745	26.7188	552.365	403.999	5		469.004	101.017	45.1762	594.433	343.575	5
18.83	527.47	106.73	47.7311	659.993	394.947	5		529.604	124.531	55.6919	684.23	374.978	5
18.92	554.204	111.869	50.0294	693.108	415.3	5		510.09	110.596	49.46	647.413	372.767	5
19	517.89	119.816	53.5831	666.661	369.119	5		486.396	116.39	52.0511	630.913	341.879	5
19.08	468.028	100.403	44.9017	592.695	343.361	5		459.356	82.7517	37.0077	562.106	356.606	5
19.17	467.35	79.5699	35.5847	566.149	368.551	5		468.576	81.5118	36.4532	569.786	367.366	5
19.25	448.69	56.5571	25.2931	518.915	378.465	5		457.668	100.431	44.914	582.369	332.967	5
19.33	428.734	70.143	31.3689	515.828	341.64	5		461.126	94.7593	42.3777	578.785	343.467	5
19.42	411.244	47.3451	21.1734	470.031	352.457	5		540.92	111.739	49.9712	679.662	402.178	5
19.5	448.108	52.0357	23.2711	512.719	383.497	5		555.884	94.0362	42.0543	672.645	439.123	5
19.58	457.826	78.377	35.0513	555.144	360.508	5		533.29	107.153	47.9203	666.338	400.242	5
19.67	454.258	70.5803	31.5645	541.895	366.621	5		519.798	80.8604	36.1618	620.199	419.397	5
19.75	457.788	35.7704	15.997	502.203	413.373	5		478.172	62.4718	27.9382	555.741	400.603	5
19.83	463.682	55.6121	24.8705	532.734	394.63	5		503.5	71.8966	32.1531	592.771	414.229	5
19.92	456.62	52.9334	23.6725	522.345	390.895	5		497.452	87.6339	39.1911	606.264	388.64	5
20	477.304	57.034	25.5064	548.121	406.487	5		490.032	101.971	45.603	616.646	363.418	5
20.08	508.862	124.543	55.6973	663.503	354.221	5		475.99	75.2432	33.6498	569.417	382.563	5
20.17	510.09	126.906	56.7541	667.665	352.515	5		476.022	73.0235	32.6571	566.693	385.351	5
20.25	538.744	133.485	59.6961	704.487	373.001	5		448.038	77.9675	34.8681	544.847	351.229	5
20.33	514.17	129.25	57.8026	674.656	353.684	5		485.006	126.056	56.3738	641.525	328.487	5
20.42	559.026	130.161	58.2096	720.642	397.41	5		466.828	108.099	48.3432	601.05	332.606	5
20.5	609.768	56.0977	25.0876	679.422	540.114	5		507.896	77.5959	34.7019	604.244	411.548	5
20.58	548.062	117.977	52.761	694.55	401.574	5		500.994	135.399	60.5524	669.114	332.874	5
20.67	548.922	79.4374	35.5255	647.557	450.287	5		544.614	145.615	65.121	725.419	363.809	5
20.75	551.392	75.97	33.9748	645.721	457.063	5		554.064	59.7865	26.7373	628.299	479.829	5
20.83	529.41	88.3069	39.492	639.057	419.763	5		523.964	64.833	28.9942	604.465	443.463	5
20.92	490.688	74.5185	33.3257	583.215	398.161	5		503.048	82.0611	36.6988	604.94	401.156	5
21	529.86	43.5057	19.4564	583.88	475.84	5		471.512	154.474	69.0829	663.317	279.707	5
21.08	501.004	54.1417	24.2129	568.23	433.778	5		483.18	152.797	68.333	672.903	293.457	5
21.17	464.216	52.6215	23.533	529.554	398.878	5		490.11	177.542	79.3991	710.557	269.663	5
21.25	456.67	56.1037	25.0903	526.332	387.008	5		478.81	124.276	55.5778	633.119	324.501	5
21.33	482.766	64.6877	28.9292	563.086	402.446	5		517.828	128.574	57.5001	677.474	358.182	5
21.42	451.406	52.806	23.6156	516.973	385.839	5		461.034	105.482	47.1729	592.007	330.061	5
21.5	480.83	86.458	38.6652	588.182	373.478	5		487.384	116.48	52.0913	632.013	342.755	5
21.58	473.712	103.224	46.1633	601.882	345.542	5		461.178	97.1307	43.4382	581.782	340.574	5
21.67	480.454	82.3956	36.8485	582.762	378.146	5		488.214	77.6873	34.7428	584.676	391.752	5
21.75	518.504	78.8534	35.2643	616.413	420.595	5		473.096	77.7636	34.7769	569.652	376.54	5
21.83	499.298	74.4064	33.2756	591.686	406.91	5		486.4	76.6274	34.2688	581.545	391.255	5
21.92	499.396	105.134	47.0172	629.937	368.855	5		497.46	85.7684	38.3568	603.956	390.964	5
22	470.33	54.4695	24.3595	537.963	402.697	5		545.36	117.642	52.6111	691.432	399.288	5
22.08	480.924	111.93	50.0566	619.904	341.944	5		560.482	120.579	53.9246	710.201	410.763	5
22.17	464.974	114.26	51.0984	606.846	323.102	5		554.568	136.716	61.1414	724.324	384.812	5
22.25	455.62	50.8072	22.7217	518.705	392.535	5		571.242	77.4287	34.6272	667.382	475.102	5
22.33	422.818	43.5787	19.489	476.928	368.708	5		504.38	55.6098	24.8695	573.429	435.331	5
22.42	452.71	59.0949	26.428	526.086	379.334	5		493.542	89.5902	40.066	604.783	382.301	5
22.5	463.078	107.354	48.0102	596.376	329.78	5		540.334	123.264	55.1252	693.386	387.282	5
22.58	455.246	88.3789	39.5242	564.983	345.509	5		519.218	105.466	47.1658	650.171	388.265	5
22.67	518.688	144.89	64.7967	698.593	338.783	5		479.562	98.1088	43.8756	601.38	357.744	5
22.75	568.568	135.162	60.4464	736.394	400.742	5		478.018	113.141	50.5983	618.502	337.534	5
22.83	611.122	112.135	50.1481	750.355	471.889	5		506.764	152.748	68.3109	696.425	317.103	5
22.92	583.958	92.288	41.2725	698.549	469.367	5		514.172	136.775	61.1675	684	344.344	5
23	615.132	30.4798	13.631	652.978	577.286	5		500.848	138.971	62.1498	673.403	328.293	5
23.08	575.67	92.468	41.3529	690.484	460.856	5		536.19	136.124	60.8765	705.21	367.17	5
23.17	554.186	100.292	44.8521	678.715	429.657	5		574.312	108.717	48.6196	709.302	439.322	5
23.25	531.888	107.451	48.0537	665.306	398.47	5		609.054	83.1374	37.1802	712.283	505.825	5
23.33	556.612	124.223	55.5544	710.856	402.368	5		619.266	47.97	21.4528	678.829	559.703	5
23.42	491.32	90.0892	40.2891	603.18	379.46	5		606.828	36.5437	16.3428	652.203	561.453	5
23.5	501.086	115.286	51.5573	644.232	357.94	5		589.036	93.5336	41.8295	705.173	472.899	5
23.58	501.308	128.924	57.6565	661.388	341.228	5		500.46	93.3885	41.7646	616.417	384.503	5
23.67	541.078	105.189	47.042	671.688	410.468	5		531.694	122.552	54.807	683.863	379.525	5
23.75	535.84	179.872	80.4412	759.181	312.499	5		543.792	156.52	69.9981	738.138	349.446	5
23.83	525.636	150.498	67.3047	712.504	338.768	5		546.186	135.265	60.4924	714.14	378.232	5
23.92	573.096	134.003	59.9282	739.483	406.709	5		487.12	114.409	51.1653	629.178	345.062	5
24	565	131.591	58.8493	728.392	401.608	5		500.43	123.222	55.1064	653.43	347.43	5
24.08	536.378	63.465	28.3824	615.18	457.576	5		482.85	88.1704	39.431	592.328	373.372	5
24.17	566.332	78.8707	35.272	664.263	468.401	5		498.132	135.566	60.6271	666.46	329.804	5
24.25	523.082	79.4936	35.5506	621.786	424.378	5		483.102	105.872	47.3472	614.559	351.645	5
24.33	542.1	57.6546	25.7839	613.688	470.512	5		546.342	58.3785	26.1077	618.828	473.856	5
24.42	515.352	108.32	48.4423	649.849	380.855	5		558.938	106.353	47.5624	690.992	426.884	5
24.5	563.944	100.559	44.9712	688.804	439.084	5		526.752	101.632	45.4513	652.945	400.559	5
24.58	522.6	107.996	48.2971	656.694	388.506	5		625.486	53.9233	24.1153	692.441	558.531	5
24.67	540.572	110.095	49.2361	677.273	403.871	5		589.016	71.2496	31.8638	677.484	500.548	5
24.75	566.114	140.135	62.6702	740.114	392.114	5		572.95	99.3493	44.4303	696.308	449.592	5
24.83	602.324	108.982	48.7383	737.643	467.005	5		584.31	138.217	61.8127	755.93	412.69	5
24.92	612.97	115.186	51.5125	755.992	469.948	5		590.388	95.7084	42.8021	709.226	471.55	5
25	628.448	95.5613	42.7363	747.103	509.793	5		563.878	107.456	48.0556	697.302	430.454	5
25.08	667.906	50.597	22.6277	730.731	605.081	5		567.154	126.462	56.5556	724.177	410.131	5
25.17	641.44	95.3543	42.6437	759.838	523.042	5		606.134	99.6355	44.5583	729.848	482.42	5
25.25	645.428	68.2901	30.5403	730.221	560.635	5		662.152	69.3014	30.9925	748.201	576.103	5
25.33	605.184	53.3858	23.8748	671.471	538.897	5		692.75	26.0808	11.6637	725.134	660.366	5
25.42	631.936	43.5854	19.492	686.054	577.818	5		673.068	31.4547	14.067	712.124	634.012	5
25.5	656.96	54.4878	24.3677	724.616	589.304	5		617.172	40.2213	17.9875	667.113	567.231	5
25.58	624.954	89.1205	39.8559	735.612	514.296	5		618.202	60.2998	26.9669	693.074	543.33	5
25.67	638.704	68.392	30.5858	723.624	553.784	5		617.476	40.6537	18.1809	667.954	566.998	5
25.75	651.602	55.6294	24.8782	720.675	582.529	5		632.53	67.3341	30.1127	716.136	548.924	5
25.83	646.308	42.1249	18.8388	698.613	594.003	5		598.796	77.7439	34.7681	695.328	502.264	5
25.92	634.77	27.3051	12.2112	668.674	600.866	5		630.626	58.1589	26.0095	702.84	558.412	5
26	630.708	43.9231	19.643	685.246	576.17	5		612.42	92.1937	41.2303	726.894	497.946	5
26.08	633.228	29.1962	13.057	669.48	596.976	5		605.312	63.6725	28.4752	684.372	526.252	5
26.17	612.892	35.0147	15.659	656.368	569.416	5		608.714	56.3457	25.1985	678.676	538.752	5
26.25	628.7	41.0163	18.3431	679.628	577.772	5		617.698	77.266	34.5544	713.636	521.76	5
26.33	646.6	24.0557	10.758	676.469	616.731	5		620.616	55.9548	25.0238	690.093	551.139	5
26.42	652.048	46.5744	20.8287	709.878	594.218	5		604.868	69.3977	31.0356	691.037	518.699	5
26.5	627.284	50.8096	22.7228	690.372	564.196	5		613.924	69.3409	31.0102	700.022	527.826	5
26.58	586.582	44.4762	19.8904	641.807	531.357	5		606.636	68.7189	30.732	691.962	521.31	5
26.67	594.048	87.1143	38.9587	702.215	485.881	5		637.23	70.156	31.3747	724.34	550.12	5
26.75	579.018	80.002	35.778	678.354	479.682	5		624.988	90.6976	40.5612	737.604	512.372	5
26.83	618.496	80.9608	36.2068	719.022	517.97	5		615.016	96.2195	43.0307	734.488	495.544	5
26.92	604.034	120.63	53.9475	753.816	454.252	5		571.254	86.5704	38.7154	678.745	463.763	5
27	576.062	132.225	59.1328	740.241	411.883	5		565.842	117.575	52.5809	711.83	419.854	5
27.08	593.598	126.441	56.546	750.595	436.601	5		518.556	75.4106	33.7247	612.191	424.921	5
27.17	597.306	113.183	50.6168	737.841	456.771	5		597.88	74.3671	33.258	690.219	505.541	5
27.25	629.93	122.724	54.8838	782.312	477.548	5		598.364	78.5804	35.1422	695.934	500.794	5
27.33	606.58	141.525	63.2919	782.307	430.853	5		545.214	96.8588	43.3166	665.48	424.948	5
27.42	557.006	136.416	61.007	726.389	387.623	5		521.434	100.072	44.7535	645.689	397.179	5
27.5	567.496	143.93	64.3677	746.209	388.783	5		559.18	142.45	63.7054	736.055	382.305	5
27.58	615.206	120.78	54.0145	765.174	465.238	5		596.53	119.037	53.2349	744.334	448.726	5
27.67	546.688	131.618	58.8611	710.113	383.263	5		603.456	167.566	74.9379	811.517	395.395	5
27.75	548.916	150.466	67.2905	735.744	362.088	5		570.336	161.625	72.281	771.02	369.652	5
27.83	631.558	110.266	49.3126	768.472	494.644	5		625.326	116.177	51.9559	769.579	481.073	5
27.92	637.982	119.732	53.5458	786.649	489.315	5		621.992	58.2046	26.0299	694.262	549.722	5
28	639.022	129.157	57.7607	799.391	478.653	5		656.148	55.0724	24.6291	724.529	587.767	5
28.08	625.168	95.3434	42.6388	743.552	506.784	5		637.638	61.7189	27.6015	714.272	561.004	5
28.17	650.912	46.9571	20.9999	709.217	592.607	5		647.744	34.874	15.5961	691.046	604.442	5
28.25	636.5	44.9008	20.0802	692.252	580.748	5		619.266	58.6901	26.247	692.139	546.393	5
28.33	610.832	32.5128	14.5401	651.202	570.462	5		624.59	75.1991	33.6301	717.962	531.218	5
28.42	613.626	56.9117	25.4517	684.291	542.961	5		646.332	67.684	30.2692	730.373	562.291	5
28.5	638.67	53.3686	23.8672	704.936	572.404	5		573.584	93.3192	41.7336	689.455	457.713	5
28.58	603.736	29.4933	13.1898	640.357	567.115	5		591.082	78.5943	35.1484	688.67	493.494	5
28.67	621.654	85.1862	38.0964	727.427	515.881	5		574.698	83.5727	37.3749	678.467	470.929	5
28.75	629.756	68.8592	30.7948	715.256	544.256	5		555.962	131.694	58.8954	719.482	392.442	5
28.83	581.55	46.3422	20.7248	639.091	524.009	5		550.824	141.077	63.0917	725.995	375.653	5
28.92	568.834	44.5767	19.9353	624.183	513.485	5		576.706	124.626	55.7345	731.45	421.962	5
29	575.148	23.4434	10.4842	604.257	546.039	5		602.672	147.689	66.0486	786.052	419.292	5
29.08	585.634	96.3586	43.0929	705.279	465.989	5		642.65	99.905	44.6789	766.698	518.602	5
29.17	577.932	88.0417	39.3734	687.25	468.614	5		643.3	91.6446	40.9847	757.092	529.508	5
29.25	614.258	103.379	46.2327	742.621	485.895	5		624.014	83.2087	37.2121	727.331	520.697	5
29.33	612.826	110.674	49.4948	750.246	475.406	5		576.178	109.648	49.0363	712.325	440.031	5
29.42	526.732	130.289	58.2668	688.507	364.957	5		530.728	122.266	54.6791	682.542	378.914	5
29.5	526.924	133.947	59.9031	693.242	360.606	5		514.294	138.56	61.9659	686.339	342.249	5
29.58	615.44	121.465	54.3206	766.258	464.622	5		565.88	112.417	50.2744	705.464	426.296	5
29.67	586.82	118.224	52.8713	733.614	440.026	5		556.504	102.409	45.7989	683.662	429.346	5
29.75	591.702	85.245	38.1227	697.548	485.856	5		554.784	38.1319	17.0531	602.131	507.437	5
29.83	579.592	118.826	53.1405	727.134	432.05	5		567.402	81.9048	36.6289	669.1	465.704	5
29.92	592.228	116.855	52.2593	737.323	447.133	5		588.482	65.8536	29.4506	670.25	506.714	5
30	646.618	55.3783	24.766	715.379	577.857	5		604.814	54.3478	24.3051	672.296	537.332	5
30.08	613.122	111.793	49.9952	751.931	474.313	5		603.542	46.5225	20.8055	661.307	545.777	5
30.17	650.034	39.2734	17.5636	698.798	601.27	5		592.194	71.9478	32.176	681.529	502.859	5
30.25	624.992	66.3349	29.6658	707.358	542.626	5		580.152	90.1861	40.3324	692.133	468.171	5
30.33	566.702	59.9024	26.7892	641.081	492.323	5		595.026	66.6082	29.7881	677.731	512.321	5
30.42	583.302	71.8624	32.1378	672.531	494.073	5		594.534	72.4033	32.3797	684.435	504.633	5
30.5	574.096	50.2226	22.4602	636.456	511.736	5		606.542	89.3899	39.9764	717.534	495.55	5
30.58	605.116	64.6864	28.9286	685.435	524.797	5		576.584	71.45	31.9534	665.301	487.867	5
30.67	559.634	56.0122	25.0494	629.182	490.086	5		597.786	57.1231	25.5462	668.714	526.858	5
30.75	564.668	57.9987	25.9378	636.683	492.653	5		623.94	94.1315	42.0969	740.82	507.06	5
30.83	547.83	77.5275	34.6713	644.093	451.567	5		560.148	119.364	53.3812	708.358	411.938	5
30.92	523.606	98.8203	44.1938	646.308	400.904	5		564.408	89.4603	40.0079	675.488	453.328	5
31	587.18	99.0453	44.2944	710.161	464.199	5		581.602	89.7914	40.1559	693.093	470.111	5
31.08	592.05	88.5786	39.6136	702.035	482.065	5		567.272	94.5054	42.2641	684.616	449.928	5
31.17	523.708	88.9516	39.7804	634.156	413.26	5		537.15	149.424	66.8246	722.685	351.615	5
31.25	486.024	92.8724	41.5338	601.34	370.708	5		522.37	144.487	64.6166	701.775	342.965	5
31.33	540.978	84.8508	37.9464	646.334	435.622	5		514.14	149.84	67.0105	700.191	328.089	5
31.42	543.616	89.8212	40.1693	655.144	432.088	5		495.05	115.54	51.6711	638.512	351.588	5
31.5	560.764	124.729	55.7806	715.636	405.892	5		500.228	130.334	58.2873	662.06	338.396	5
31.58	571.084	112.891	50.4862	711.256	430.912	5		540.256	92.3657	41.3072	654.943	425.569	5
31.67	512.996	79.7593	35.6695	612.03	413.962	5		544.092	123.19	55.0922	697.052	391.132	5
31.75	564.762	93.8479	41.97	681.29	448.234	5		565.186	115.042	51.4485	708.03	422.342	5
31.83	617.254	115.631	51.7119	760.829	473.679	5		555.14	97.9015	43.7829	676.701	433.579	5
31.92	614.722	119.825	53.5873	763.504	465.94	5		578.528	132.145	59.0969	742.607	414.449	5
32	536.92	104.033	46.525	666.094	407.746	5		659.208	60.0694	26.8639	733.794	584.622	5
32.08	567.89	100.389	44.8951	692.539	443.241	5		598.356	110.208	49.2865	735.197	461.515	5
32.17	562.48	144.789	64.7515	742.259	382.701	5		596.186	134.551	60.1731	763.253	429.119	5
32.25	568.282	111.758	49.9797	707.048	429.516	5		558.062	87.8796	39.3009	667.179	448.945	5
32.33	571.85	101.417	45.355	697.776	445.924	5		594.154	40.4955	18.1101	644.436	543.872	5
32.42	548.018	89.4211	39.9903	659.049	436.987	5		536.04	135.609	60.646	704.42	367.66	5
32.5	505.27	64.3328	28.7705	585.15	425.39	5		601.782	123.592	55.2721	755.242	448.322	5
32.58	535.062	103.965	46.4947	664.152	405.972	5		548.55	166.24	74.3448	754.964	342.136	5
32.67	570.104	100.915	45.1305	695.406	444.802	5		549.068	122.04	54.5779	700.601	397.535	5
32.75	552.658	145.712	65.1645	733.584	371.732	5		532.258	98.4229	44.016	654.466	410.05	5
32.83	560.434	120.052	53.689	709.499	411.369	5		584.778	71.2928	31.8831	673.3	496.256	5
32.92	566.478	142.493	63.725	743.407	389.549	5		543.538	50.1011	22.4059	605.747	481.329	5
33	576.398	144.426	64.5892	755.726	397.07	5		538.064	100.009	44.7252	662.241	413.887	5
33.08	603.22	142.003	63.5055	779.54	426.9	5		479.962	72.8684	32.5877	570.44	389.484	5
33.17	584.668	162.108	72.4969	785.952	383.384	5		564.324	134.327	60.0729	731.113	397.535	5
33.25	562.92	88.4012	39.5342	672.685	453.155	5		544.294	164.78	73.6919	748.895	339.693	5
33.33	597.682	108.71	48.6164	732.663	462.701	5		538.146	146.538	65.5337	720.097	356.195	5
33.42	566.98	113.735	50.8637	708.2	425.76	5		610.794	109.452	48.9484	746.697	474.891	5
33.5	558.546	127.799	57.1534	717.229	399.863	5		584.008	133.257	59.5943	749.468	418.548	5
33.58	575.202	109.821	49.1133	711.562	438.842	5		630.108	81.2295	36.3269	730.968	529.248	5
33.67	621.306	115.349	51.5855	764.53	478.082	5		585.894	132.3	59.1662	750.166	421.622	5
33.75	635.75	55.6785	24.9002	704.884	566.616	5		601.052	108.879	48.692	736.243	465.861	5
33.83	591.474	110.476	49.4062	728.648	454.3	5		566.402	99.5292	44.5108	689.984	442.82	5
33.92	575.43	121.003	54.1143	725.675	425.185	5		588.882	135.442	60.5715	757.055	420.709	5
34	579.6	118.127	52.8278	726.274	432.926	5		575.846	102.699	45.9283	703.363	448.329	5
34.08	562.31	138.682	62.0205	734.507	390.113	5		615.476	83.2087	37.212	718.793	512.159	5
34.17	600.108	137.478	61.4821	770.81	429.406	5		599.976	130.279	58.2624	761.738	438.214	5
34.25	615.768	102.377	45.7842	742.885	488.651	5		556.884	136.494	61.042	726.364	387.404	5
34.33	658.428	73.5805	32.9062	749.79	567.066	5		561.816	94.99	42.4808	679.762	443.87	5
34.42	604.174	92.7993	41.5011	719.4	488.948	5		603.39	86.6377	38.7455	710.965	495.815	5
34.5	573.774	119.786	53.5697	722.507	425.041	5		598.646	40.7934	18.2434	649.298	547.994	5
34.58	536.826	119.708	53.5349	685.463	388.189	5		604.954	96.4888	43.1511	724.761	485.147	5
34.67	565.934	126.248	56.4599	722.692	409.176	5		594.234	108.491	48.5185	728.943	459.525	5
34.75	553.32	109.766	49.0888	689.612	417.028	5		580.256	140.607	62.8812	754.842	405.67	5
34.83	632.254	113.816	50.9001	773.575	490.933	5		632.208	60.5138	27.0626	707.346	557.07	5
34.92	609.1	90.7006	40.5625	721.72	496.48	5		578.338	104.756	46.8484	708.41	448.266	5
35	649.48	61.7208	27.6024	726.117	572.843	5		571.756	139.662	62.4589	745.17	398.342	5
35.08	605.77	92.9856	41.5844	721.227	490.313	5		577.044	138.154	61.7844	748.585	405.503	5
35.17	571.394	76.2516	34.1008	666.073	476.715	5		626.644	87.4671	39.1165	735.249	518.039	5
35.25	556.96	81.8095	36.5863	658.54	455.38	5		554.356	106.148	47.4706	686.156	422.556	5
35.33	599.616	84.2367	37.6718	704.21	495.022	5		543.946	95.3549	42.644	662.345	425.547	5
35.42	598.36	89.1545	39.8711	709.06	487.66	5		563.146	46	20.5718	620.262	506.03	5
35.5	626.22	64.566	28.8748	706.389	546.051	5		540.25	51.4513	23.0097	604.135	476.365	5
35.58	635.23	52.0859	23.2935	699.903	570.557	5		576.538	68.2712	30.5318	661.308	491.768	5
35.67	601.488	95.0693	42.5163	719.532	483.444	5		598.702	29.9384	13.3889	635.875	561.529	5
35.75	645.324	71.9749	32.1881	734.693	555.955	5		649.752	74.2853	33.2214	741.989	557.515	5
35.83	656.838	101.595	45.4346	782.985	530.691	5		616.434	76.1178	34.0409	710.947	521.921	5
35.92	641.146	55.9426	25.0183	710.608	571.684	5		604.428	63.312	28.314	683.04	525.816	5
36	606.89	41.1102	18.3851	657.935	555.845	5		598.97	79.8852	35.7257	698.161	499.779	5
36.08	623.85	36.4905	16.319	669.159	578.541	5		637.08	110.145	49.2582	773.843	500.317	5
36.17	570.036	119.344	53.3721	718.221	421.851	5		586.038	130.077	58.1722	747.55	424.526	5
36.25	591.868	104.386	46.6826	721.48	462.256	5		582.356	113.155	50.6044	722.856	441.856	5
36.33	581.18	103.368	46.2277	709.529	452.831	5		536.442	124.582	55.7148	691.131	381.753	5
36.42	602.332	101.608	45.4403	728.495	476.169	5		558.11	108.917	48.7093	693.349	422.871	5
36.5	572.996	119.226	53.3196	721.035	424.957	5		585.836	72.9568	32.6273	676.424	495.248	5
36.58	565.922	73.1758	32.7252	656.782	475.062	5		570.398	107.72	48.1738	704.15	436.646	5
36.67	538.814	62.7237	28.0509	616.696	460.932	5		549.078	123.599	55.2752	702.547	395.609	5
36.75	582.722	68.1508	30.478	667.342	498.102	5		553.77	60.7534	27.1698	629.205	478.335	5
36.83	540.298	76.0748	34.0217	634.757	445.839	5		548.622	77.9407	34.8561	645.398	451.846	5
36.92	554.404	60.6018	27.1019	629.651	479.157	5		551.774	82.4267	36.8624	654.12	449.428	5
37	537.056	90.6207	40.5268	649.576	424.536	5		541.58	84.1714	37.6426	646.093	437.067	5
37.08	513.524	94.6294	42.3196	631.022	396.026	5		530.558	78.8621	35.2682	628.478	432.638	5
37.17	537.73	69.8719	31.2477	624.487	450.973	5		540.442	82.9278	37.0864	643.41	437.474	5
37.25	498.288	43.5923	19.4951	552.415	444.161	5		543.294	94.8651	42.425	661.085	425.503	5
37.33	502.358	82.265	36.79	604.504	400.212	5		507.354	79.5506	35.5761	606.129	408.579	5
37.42	510.612	61.0936	27.3219	586.47	434.754	5		495.156	69.7017	31.1716	581.702	408.61	5
37.5	484.828	53.4904	23.9216	551.245	418.411	5		514.53	77.6718	34.7359	610.972	418.088	5
37.58	506.312	21.0096	9.39576	532.399	480.225	5		521.408	43.0176	19.2381	574.821	467.995	5
37.67	466.514	34.0351	15.2209	508.774	424.254	5		531.894	93.1117	41.6408	647.507	416.281	5
37.75	494.378	61.8918	27.6788	571.227	417.529	5		460.724	90.2601	40.3656	572.797	348.651	5
37.83	481.184	55.1031	24.6429	549.604	412.764	5		500.444	113.351	50.6923	641.188	359.7	5
37.92	472.688	67.7664	30.306	556.831	388.545	5		476.57	82.9267	37.086	579.537	373.603	5
38	487.666	94.2249	42.1386	604.662	370.67	5		459.514	68.5473	30.6553	544.627	374.401	5
38.08	485.95	74.7526	33.4304	578.768	393.132	5		492.708	90.6208	40.5268	605.229	380.187	5
38.17	482.252	99.0044	44.2761	605.182	359.322	5		483.108	92.7346	41.4722	598.253	367.963	5
38.25	484.398	55.071	24.6285	552.778	416.018	5		504.514	79.5289	35.5664	603.262	405.766	5
38.33	484.42	61.3706	27.4458	560.622	408.218	5		473.936	113.954	50.9619	615.429	332.443	5
38.42	528.154	104.901	46.913	658.405	397.903	5		462.036	88.1795	39.4351	571.525	352.547	5
38.5	497.26	89.7357	40.131	608.682	385.838	5		539.862	94.9717	42.4726	657.785	421.939	5
38.58	500.762	52.6746	23.5568	566.166	435.358	5		495.922	43.5076	19.4572	549.944	441.9	5
38.67	507.912	55.234	24.7014	576.494	439.33	5		490.13	88.4953	39.5763	600.011	380.249	5
38.75	526.864	86.0886	38.5	633.757	419.971	5		503.62	102.817	45.9811	631.284	375.956	5
38.83	520.164	64.7275	28.947	600.534	439.794	5		526.532	104.951	46.9357	656.846	396.218	5
38.92	500.484	76.7461	34.3219	595.777	405.191	5		511.606	92.0334	41.1586	625.881	397.331	5
39	531.462	92.0109	41.1485	645.709	417.215	5		482.602	107.595	48.1179	616.199	349.005	5
39.08	551.276	68.5827	30.6711	636.433	466.119	5		481.11	55.1216	24.6511	549.553	412.667	5
39.17	536.14	81.0358	36.2403	636.759	435.521	5		480.794	120.857	54.0488	630.858	330.73	5
39.25	518.732	113.62	50.8126	659.81	377.654	5		419.934	111.446	49.8402	558.313	281.555	5
39.33	511.18	130.152	58.2056	672.785	349.575	5		532.598	84.4664	37.7745	637.477	427.719	5
39.42	532.164	105.369	47.1226	662.997	401.331	5		508.746	94.7923	42.3924	626.446	391.046	5
39.5	500.592	96.6943	43.243	620.654	380.53	5		530.854	68.6754	30.7126	616.126	445.582	5
39.58	550.91	90.507	40.4759	663.289	438.531	5		516.11	89.9794	40.24	627.834	404.386	5
39.67	478.312	105.073	46.99	608.777	347.847	5		483.678	160.686	71.861	683.196	284.16	5
39.75	478.192	93.8732	41.9814	594.751	361.633	5		560.994	138.445	61.9144	732.896	389.092	5
39.83	494.88	100.805	45.0816	620.046	369.714	5		568.184	103.696	46.3744	696.94	439.428	5
39.92	444.784	42.3191	18.9257	497.33	392.238	5		513.446	119.281	53.344	661.553	365.339	5
40	512.042	59.8009	26.7438	586.295	437.789	5		527.358	89.906	40.2072	638.991	415.725	5
40.08	489.632	33.5387	14.9989	531.276	447.988	5		460.328	81.0123	36.2298	560.918	359.738	5
40.17	478.13	32.7924	14.6652	518.847	437.413	5		436.412	122.108	54.6083	588.029	284.795	5
40.25	510.83	68.1067	30.4582	595.396	426.264	5		484.476	88.8349	39.7282	594.779	374.173	5
40.33	464.838	41.9156	18.7452	516.883	412.793	5		461.35	116.296	52.009	605.75	316.95	5
40.42	512.686	57.9721	25.9259	584.668	440.704	5		472.29	109.014	48.7525	607.649	336.931	5
40.5	524.22	92.1332	41.2032	638.619	409.821	5		451.502	71.782	32.1019	540.631	362.373	5
40.58	522.582	82.9635	37.1024	625.595	419.569	5		497.358	114.121	51.0363	639.057	355.659	5
40.67	479.2	47.1501	21.0862	537.745	420.655	5		501.504	85.158	38.0838	607.242	395.766	5
40.75	505.924	53.0478	23.7237	571.792	440.056	5		492.042	88.3645	39.5178	601.761	382.323	5
40.83	482.864	45.3039	20.2605	539.116	426.612	5		455.792	75.1832	33.6229	549.144	362.44	5
40.92	482.628	59.4791	26.5999	556.481	408.775	5		477.58	63.4297	28.3666	556.338	398.822	5
41	453.772	64.7747	28.9681	534.2	373.344	5		439.61	55.919	25.0077	509.043	370.177	5
41.08	472.646	83.3468	37.2738	576.135	369.157	5		462.64	100.119	44.7744	586.954	338.326	5
41.17	509.63	112.414	50.273	649.21	370.05	5		454.02	82.9133	37.0799	556.97	351.07	5
41.25	503.798	101.569	45.4231	629.913	377.683	5		463.456	110.749	49.5282	600.968	325.944	5
41.33	515.4	66.8024	29.8749	598.346	432.454	5		448.078	105.359	47.1178	578.898	317.258	5
41.42	472.334	64.5099	28.8497	552.434	392.234	5		418.5	116.399	52.0551	563.028	273.972	5
41.5	469.064	38.0468	17.015	516.305	421.823	5		495.036	62.4872	27.9451	572.624	417.448	5
41.58	478.536	51.7155	23.1279	542.749	414.323	5		509.362	58.3811	26.1088	581.852	436.872	5
41.67	476.774	48.764	21.8079	537.323	416.225	5		503.53	61.624	27.5591	580.046	427.014	5
41.75	519.788	76.3666	34.1522	614.61	424.966	5		520.508	77.0065	34.4384	616.124	424.892	5
41.83	539.426	80.6727	36.0779	639.594	439.258	5		541.804	108.403	48.4793	676.404	407.204	5
41.92	525.186	109.659	49.0411	661.346	389.026	5		527.052	80.5408	36.019	627.057	427.047	5
42	523.424	125.013	55.9074	678.648	368.2	5		473.902	65.1684	29.1442	554.819	392.985	5
42.08	553.33	69.4103	31.0412	639.514	467.146	5		502.598	113.832	50.907	643.939	361.257	5
42.17	533.638	100.224	44.8217	658.083	409.193	5		453.41	90.2357	40.3546	565.452	341.368	5
42.25	507.502	90.6515	40.5406	620.061	394.943	5		427.438	83.7947	37.4741	531.483	323.393	5
42.33	484.406	72.8034	32.5587	574.803	394.009	5		501.958	98.2717	43.9485	623.978	379.938	5
42.42	509.374	66.8405	29.892	592.367	426.381	5		472.736	136.139	60.8832	641.775	303.697	5
42.5	551.848	42.0444	18.8028	604.053	499.643	5		505.634	74.3032	33.2294	597.894	413.374	5
42.58	513.574	42.5365	19.0229	566.39	460.758	5		441.062	110.33	49.341	578.055	304.069	5
42.67	470.102	56.4973	25.2664	540.253	399.951	5		492.614	84.6387	37.8516	597.707	387.521	5
42.75	459.698	64.2975	28.7547	539.534	379.862	5		482.432	44.597	19.9444	537.807	427.057	5
42.83	482.994	76.6278	34.269	578.14	387.848	5		479.082	75.7469	33.875	573.134	385.03	5
42.92	533.906	76.4924	34.2085	628.884	438.928	5		478.624	138.584	61.9768	650.699	306.549	5
43	491.012	98.2137	43.9225	612.96	369.064	5		477.23	132.987	59.4735	642.355	312.105	5
43.08	483.32	38.7526	17.3307	531.438	435.202	5		522.592	110.936	49.6119	660.337	384.847	5
43.17	500.908	58.0494	25.9605	572.986	428.83	5		481.156	65.176	29.1476	562.083	400.229	5
43.25	473.308	55.9649	25.0283	542.798	403.818	5		497.924	78.2117	34.9773	595.037	400.811	5
43.33	493.022	72.7166	32.5198	583.312	402.732	5		457.89	71.9881	32.1941	547.275	368.505	5
43.42	506.526	64.3372	28.7725	586.411	426.641	5		477.452	50.7898	22.7139	540.516	414.388	5
43.5	461.756	43.0003	19.2303	515.148	408.364	5		480.318	123.963	55.4381	634.239	326.397	5
43.58	488.722	36.8518	16.4806	534.48	442.964	5		495.678	130.078	58.1728	657.192	334.164	5
43.67	510.636	83.9539	37.5453	614.879	406.393	5		556.572	61.9193	27.6912	633.455	479.689	5
43.75	512.24	82.5017	36.8959	614.679	409.801	5		557.228	115.147	51.4953	700.202	414.254	5
43.83	489.3	95.5492	42.7309	607.94	370.66	5		527.818	66.1728	29.5934	609.982	445.654	5
43.92	513.974	105.076	46.9913	644.443	383.505	5		541.654	62.6496	28.0178	619.444	463.864	5
44	433.824	29.2751	13.0922	470.174	397.474	5		519.54	89.3913	39.977	630.534	408.546	5
44.08	472.966	66.5846	29.7775	555.642	390.29	5		500.896	93.4889	41.8095	616.978	384.814	5
44.17	461.724	52.6652	23.5526	527.117	396.331	5		495.638	58.1159	25.9902	567.798	423.478	5
44.25	553.258	91.9	41.0989	667.367	439.149	5		519.892	90.9753	40.6854	632.853	406.931	5
44.33	501.134	106.864	47.7909	633.823	368.445	5		516.336	103.827	46.433	645.255	387.417	5
44.42	495.004	133.759	59.8187	661.087	328.921	5		519.084	73.3841	32.8184	610.202	427.966	5
44.5	567.764	139.261	62.2794	740.679	394.849	5		513.236	136.661	61.1166	682.923	343.549	5
44.58	541.048	120.855	54.0482	691.11	390.986	5		559.57	139.753	62.4996	733.097	386.043	5
44.67	547.902	138.605	61.9861	720.003	375.801	5		530.87	111.548	49.8859	669.375	392.365	5
44.75	536.894	89.9166	40.2119	648.54	425.248	5		478.996	109.134	48.8063	614.504	343.488	5
44.83	526.666	51.8688	23.1964	591.07	462.262	5		450.716	92.875	41.535	566.036	335.396	5
44.92	513.044	36.6905	16.4085	558.601	467.487	5		467.276	91.1105	40.7459	580.405	354.147	5
45	441.756	61.9609	27.7098	518.691	364.821	5		492.61	57.5342	25.7301	564.048	421.172	5
45.08	499.694	65.8027	29.4279	581.399	417.989	5		488.26	41.1833	18.4178	539.396	437.124	5
45.17	526.7	64.1589	28.6927	606.364	447.036	5		519.034	82.3376	36.8225	621.27	416.798	5
45.25	508.41	118.662	53.067	655.748	361.072	5		506.594	69.7622	31.1986	593.215	419.973	5
45.33	500.85	105.678	47.2606	632.066	369.634	5		523.084	79.9934	35.7741	622.409	423.759	5
45.42	522.478	63.9311	28.5908	601.859	443.097	5		478.454	85.9977	38.4593	585.234	371.674	5
45.5	512.406	72.4787	32.4135	602.4	422.412	5		472.718	72.8473	32.5783	563.17	382.266	5
45.58	486.326	76.3633	34.1507	581.144	391.508	5		472.624	81.8694	36.6131	574.278	370.97	5
45.67	498.938	96.986	43.3735	619.362	378.514	5		450.056	80.7836	36.1275	550.362	349.75	5
45.75	491.718	114.498	51.2049	633.885	349.551	5		501.858	58.7647	26.2804	574.824	428.892	5
45.83	536.912	103.598	46.3307	665.547	408.277	5		466.88	147.936	66.159	650.567	283.193	5
45.92	548.526	114.684	51.2882	690.925	406.127	5		488.416	121.348	54.2683	639.089	337.743	5
46	555.714	101.849	45.5481	682.176	429.252	5		481.838	139.66	62.4577	655.248	308.428	5
46.08	495.988	124.133	55.5139	650.119	341.857	5		547.448	118.615	53.046	694.727	400.169	5
46.17	481.982	105.902	47.3607	613.476	350.488	5		550.548	117.554	52.5716	696.51	404.586	5
46.25	519.39	85.5152	38.2436	625.571	413.209	5		569.872	80.4587	35.9822	669.775	469.969	5
46.33	508.45	88.2441	39.464	618.02	398.88	5		556.178	87.8871	39.3043	665.304	447.052	5
46.42	469.446	64.8646	29.0083	549.986	388.906	5		548.504	104.913	46.9185	678.771	418.237	5
46.5	440.98	34.1362	15.2662	483.366	398.594	5		470.19	137.302	61.4031	640.672	299.708	5
46.58	512.152	89.5593	40.0521	623.355	400.949	5		481.4	67.1624	30.0359	564.793	398.007	5
46.67	544.962	92.4024	41.3236	659.695	430.229	5		523.136	66.4255	29.7064	605.614	440.658	5
46.75	475.062	45.3259	20.2704	531.342	418.782	5		481.136	86.3297	38.6078	588.328	373.944	5
46.83	512.516	93.2827	41.7173	628.342	396.69	5		459.848	80.5472	36.0218	559.861	359.835	5
46.92	458.598	65.4294	29.2609	539.839	377.357	5		485.428	82.4546	36.8748	587.809	383.047	5
47	482.99	110.832	49.5658	620.607	345.373	5		514.034	48.5419	21.7086	574.307	453.761	5
47.08	528.628	149.121	66.689	713.786	343.47	5		447.388	89.7306	40.1287	558.803	335.973	5
47.17	536.936	149.072	66.6671	722.034	351.838	5		508.756	132.426	59.2225	673.184	344.328	5
47.25	579.666	101.647	45.458	705.878	453.454	5		540.826	93.8543	41.9729	657.362	424.29	5
47.33	531.568	108.263	48.4167	665.994	397.142	5		521.036	93.7105	41.9086	637.393	404.679	5
47.42	558.268	127.947	57.2197	717.135	399.401	5		523.358	102.083	45.6528	650.11	396.606	5
47.5	534.722	115.39	51.6042	677.998	391.446	5		525.036	119.66	53.5135	673.613	376.459	5
47.58	540.04	119.638	53.504	688.591	391.489	5		526.338	131.976	59.0213	690.207	362.469	5
47.67	561.398	108.66	48.5943	696.318	426.478	5		495.82	75.0399	33.5589	588.994	402.646	5
47.75	487.732	109.748	49.0806	624.002	351.462	5		561.8	106.164	47.4781	693.62	429.98	5
47.83	481.214	53.2145	23.7982	547.289	415.139	5		532.982	118.7	53.0841	680.367	385.597	5
47.92	471.98	97.5905	43.6438	593.155	350.805	5		538.37	95.4813	42.7005	656.926	419.814	5

## Sheet: Supplementary Figure 1F
			Baseline							+ Tamoxifen						Activity day	Control	Stim1 smKO + vehicle		Activity night	Control	Stim1 smKO + vehicle
Time (h)	Mean	SD	SEM	Upper limit	Lower limit	N		Mean	SD	SEM	Upper limit	Lower limit	N			Mouse 1	0.050125	0.030854		Mouse 1	0.190926	0.195092
0	0.17	0.303315	0.135647	0.546615	-0.206615	5		0.18	0.375167	0.16778	0.645831	-0.285831	5			Mouse 2	0.040229	0.033826		Mouse 2	0.153599	0.130334
0.08	0.38	0.686112	0.306839	1.23192	-0.471921	5		0	0	0	0	0	5			Mouse 3	0.093894	0.077647		Mouse 3	0.333544	0.348942
0.17	0.07	0.156525	0.07	0.264351	-0.124351	5		0.18	0.270647	0.121037	0.516053	-0.156053	5			Mouse 4	0.113174	0.097869		Mouse 4	0.268049	0.301207
0.25	0	0	0	0	0	5		0.08	0.115109	0.0514782	0.222926	-0.0629263	5			Mouse 5	0.071324	0.092002		Mouse 5	0.262216	0.282365
0.33	0	0	0	0	0	5		0.06	0.0894427	0.04	0.171058	-0.0510578	5
0.42	0.05	0.111803	0.05	0.188822	-0.0888223	5		0.08	0.178885	0.08	0.302116	-0.142116	5		Paired t test				Paired t test
0.5	0.02	0.0447214	0.02	0.0755289	-0.0355289	5		0.64	0.732632	0.327643	1.54968	-0.269683	5		P value	0.3744			P value	0.3558
0.58	0.01	0.0223607	0.01	0.0377645	-0.0177645	5		0.07	0.109545	0.0489898	0.206017	-0.0660175	5		Significantly different (P < 0.05)?	No			Significantly different (P < 0.05)?	No
0.67	0.21	0.347131	0.155242	0.64102	-0.22102	5		0.01	0.0223607	0.01	0.0377645	-0.0177645	5		One- or two-tailed P value?	Two-tailed			One- or two-tailed P value?	Two-tailed
0.75	0	0	0	0	0	5		0.22	0.368443	0.164773	0.677482	-0.237482	5
0.83	0.09	0.201246	0.09	0.33988	-0.15988	5		0.12	0.15248	0.0681909	0.309328	-0.0693283	5		Mean of differences (B - A)	-0.00731			Mean of differences (B - A)	0.009921
0.92	0	0	0	0	0	5		0.17	0.233452	0.104403	0.459869	-0.119869	5		SD of differences	0.01636			SD of differences	0.02127
1	0.09	0.124499	0.0556776	0.244586	-0.0645859	5		0.13	0.198746	0.0888819	0.376776	-0.116776	5		SEM of differences	0.007318			SEM of differences	0.009511
1.08	0.52	0.481664	0.215407	1.11806	-0.0780646	5		0.26	0.357771	0.16	0.704231	-0.184231	5		95% confidence interval	-0.02763 to 0.01301			95% confidence interval	-0.01648 to 0.03633
1.17	0.71	0.270185	0.12083	1.04548	0.374521	5		0.64	0.950263	0.424971	1.81991	-0.539908	5
1.25	0.2	0.369121	0.165076	0.658324	-0.258324	5		1.07	0.878635	0.392938	2.16097	-0.0209698	5
1.33	0.39	0.601457	0.26898	1.13681	-0.356807	5		0.22	0.279732	0.1251	0.567333	-0.127333	5
1.42	0.33	0.411704	0.18412	0.841198	-0.181198	5		0.84	0.468241	0.209404	1.4214	0.258602	5
1.5	0.84	0.960729	0.429651	2.0329	-0.352902	5		0.41	0.462871	0.207002	0.984731	-0.164731	5
1.58	0.32	0.416233	0.186145	0.836822	-0.196822	5		0.38	0.35812	0.160156	0.824665	-0.0646648	5
1.67	0.162	0.180887	0.080895	0.386601	-0.0626005	5		0.24	0.35602	0.159217	0.682057	-0.202057	5
1.75	0.36	0.392747	0.175642	0.847659	-0.127659	5		0.712	0.775384	0.346762	1.67477	-0.250766	5
1.83	0.67	0.380132	0.17	1.142	0.198004	5		0.53	0.448051	0.200375	1.08633	-0.0263292	5
1.92	0.16	0.232916	0.104163	0.449204	-0.129204	5		0.58	0.765343	0.342272	1.5303	-0.370299	5
2	0.31	0.610737	0.27313	1.06833	-0.44833	5		0.41	0.311047	0.139104	0.796215	0.0237846	5
2.08	0.3	0.165831	0.074162	0.505907	0.0940933	5		0.42	0.408656	0.182757	0.927414	-0.0874139	5
2.17	0.41	0.238223	0.106536	0.705792	0.114208	5		0.33	0.294958	0.131909	0.696238	-0.0362383	5
2.25	0.22	0.0974679	0.043589	0.341022	0.0989776	5		0.41	0.541295	0.242074	1.08211	-0.262106	5
2.33	0.4	0.401559	0.179583	0.898602	-0.0986019	5		0.34	0.60663	0.271293	1.09323	-0.413231	5
2.42	0.25	0.504975	0.225832	0.87701	-0.37701	5		0.13	0.120416	0.0538516	0.279516	-0.0195161	5
2.5	0.5	0.685565	0.306594	1.35124	-0.351242	5		0.31	0.43359	0.193907	0.848373	-0.228373	5
2.58	0.44	0.414427	0.185338	0.954579	-0.0745795	5		0.63	0.592242	0.264858	1.36536	-0.105365	5
2.67	0.11	0.151658	0.0678233	0.298308	-0.0783077	5		0.21	0.469574	0.21	0.793053	-0.373053	5
2.75	0.44	0.670261	0.29975	1.27224	-0.392239	5		0.39	0.458803	0.205183	0.959679	-0.179679	5
2.83	0.14	0.238223	0.106536	0.435792	-0.155792	5		0.3	0.318198	0.142302	0.695095	-0.0950951	5
2.92	0	0	0	0	0	5		0.17	0.160468	0.0717635	0.369247	-0.0292474	5
3	0	0	0	0	0	5		0.62	0.450833	0.201618	1.17978	0.0602174	5
3.08	0.09	0.124499	0.0556776	0.244586	-0.0645859	5		0.01	0.0223607	0.01	0.0377645	-0.0177645	5
3.17	0.21	0.469574	0.21	0.793053	-0.373053	5		0.17	0.281957	0.126095	0.520096	-0.180096	5
3.25	0.18	0.375167	0.16778	0.645831	-0.285831	5		0.49	0.676757	0.302655	1.3303	-0.350305	5
3.33	0.02	0.0447214	0.02	0.0755289	-0.0355289	5		0.56	0.531977	0.237908	1.22054	-0.100537	5
3.42	0.08	0.178885	0.08	0.302116	-0.142116	5		0.2	0.19685	0.0880341	0.444422	-0.0444218	5
3.5	0.47	0.430987	0.192743	1.00514	-0.0651413	5		0.02	0.0447214	0.02	0.0755289	-0.0355289	5
3.58	0.44	0.171026	0.0764853	0.652357	0.227643	5		0.42	0.368443	0.164773	0.877482	-0.037482	5
3.67	0.38	0.584808	0.261534	1.10613	-0.346135	5		0.31	0.326726	0.146116	0.715684	-0.0956841	5
3.75	0.47	0.582666	0.260576	1.19348	-0.253476	5		0.38	0.400936	0.179304	0.877828	-0.117828	5
3.83	0.34	0.348927	0.156045	0.77325	-0.09325	5		0.388	0.404932	0.181091	0.89079	-0.11479	5
3.92	0.46	0.811942	0.363112	1.46816	-0.548159	5		0.27	0.402492	0.18	0.76976	-0.22976	5
4	0.34	0.357771	0.16	0.784231	-0.104231	5		0.25	0.327872	0.146629	0.657107	-0.157107	5
4.08	0.52	0.156525	0.07	0.714351	0.325649	5		0.28	0.311448	0.139284	0.666714	-0.106714	5
4.17	0.33	0.576194	0.257682	1.04544	-0.38544	5		0.42	0.566348	0.253279	1.12321	-0.283214	5
4.25	0.05	0.0612372	0.0273861	0.126036	-0.0260361	5		0.25	0.31225	0.139642	0.637709	-0.137709	5
4.33	0.07	0.109545	0.0489898	0.206017	-0.0660175	5		0.32	0.715542	0.32	1.20846	-0.568462	5
4.42	0.17	0.270647	0.121037	0.506053	-0.166053	5		0.12	0.216795	0.0969536	0.389186	-0.149186	5
4.5	0.03	0.067082	0.03	0.113293	-0.0532934	5		0.2	0.447214	0.2	0.755289	-0.355289	5
4.58	0.55	0.655744	0.293258	1.36421	-0.264214	5		1.02	1.00784	0.450722	2.2714	-0.231404	5
4.67	0.34	0.341687	0.152807	0.76426	-0.0842604	5		0.66	0.657077	0.293854	1.47587	-0.155869	5
4.75	0.09	0.151658	0.0678233	0.278308	-0.0983077	5		0.23	0.292831	0.130958	0.593598	-0.133598	5
4.83	0.07	0.156525	0.07	0.264351	-0.124351	5		0.23	0.315436	0.141067	0.621666	-0.161666	5
4.92	0.14	0.194936	0.087178	0.382045	-0.102045	5		0.27	0.523927	0.234307	0.920542	-0.380542	5
5	0.25	0.412311	0.184391	0.761951	-0.261951	5		0.17	0.171756	0.0768115	0.383263	-0.0432628	5
5.08	0.33	0.4995	0.223383	0.950211	-0.290211	5		0.29	0.458803	0.205183	0.859679	-0.279679	5
5.17	0.49	0.583524	0.26096	1.21454	-0.23454	5		0.05	0.111803	0.05	0.188822	-0.0888223	5
5.25	0.52	0.490663	0.219431	1.12924	-0.0892384	5		0.01	0.0223607	0.01	0.0377645	-0.0177645	5
5.33	0.49	0.449166	0.200873	1.04771	-0.0677131	5		0.06	0.134164	0.06	0.226587	-0.106587	5
5.42	0.04	0.0894427	0.04	0.151058	-0.0710578	5		0	0	0	0	0	5
5.5	0.11	0.159687	0.0714143	0.308278	-0.0882778	5		0.04	0.0894427	0.04	0.151058	-0.0710578	5
5.58	0.29	0.31305	0.14	0.678702	-0.0987023	5		0.24	0.536656	0.24	0.906347	-0.426347	5
5.67	0.54	0.584594	0.261438	1.26587	-0.185869	5		0.03	0.067082	0.03	0.113293	-0.0532934	5
5.75	0.3	0.509902	0.228035	0.933127	-0.333127	5		0.04	0.0894427	0.04	0.151058	-0.0710578	5
5.83	0.38	0.766975	0.343001	1.33232	-0.572325	5		0.16	0.357771	0.16	0.604231	-0.284231	5
5.92	0.25	0.34641	0.154919	0.680125	-0.180125	5		0.13	0.185742	0.0830662	0.360629	-0.100629	5
6	0.37	0.501996	0.224499	0.99331	-0.25331	5		0.04	0.065192	0.0291548	0.120947	-0.0409466	5
6.08	0.39	0.450555	0.201494	0.949438	-0.169438	5		0.48	0.543829	0.243208	1.15525	-0.195253	5
6.17	0.2	0.273861	0.122474	0.540044	-0.140044	5		0.15	0.282843	0.126491	0.501196	-0.201196	5
6.25	0.52	0.556327	0.248797	1.21077	-0.170772	5		0.14	0.31305	0.14	0.528702	-0.248702	5
6.33	0.52	0.265989	0.118954	0.850269	0.189731	5		0.18	0.284165	0.127083	0.532838	-0.172838	5
6.42	0.21	0.368103	0.164621	0.667061	-0.247061	5		0.46	0.86487	0.386782	1.53388	-0.613878	5
6.5	0.04	0.065192	0.0291548	0.120947	-0.0409466	5		0.64	0.967858	0.432839	1.84176	-0.561755	5
6.58	0.53	0.681542	0.304795	1.37625	-0.316247	5		0.25	0.337268	0.150831	0.668774	-0.168774	5
6.67	0.26	0.581378	0.26	0.981876	-0.461876	5		0.12	0.15248	0.0681909	0.309328	-0.0693283	5
6.75	0.08	0.130384	0.0583095	0.241893	-0.0818932	5		0.16	0.357771	0.16	0.604231	-0.284231	5
6.83	0.14	0.31305	0.14	0.528702	-0.248702	5		0.19	0.210357	0.0940744	0.451193	-0.0711925	5
6.92	0.19	0.324808	0.145258	0.593302	-0.213302	5		0.308	0.321434	0.14375	0.707113	-0.0911134	5
7	0.02	0.0273861	0.0122474	0.0540044	-0.0140044	5		0.32	0.416233	0.186145	0.836822	-0.196822	5
7.08	0	0	0	0	0	5		0.22	0.313449	0.140178	0.609198	-0.169198	5
7.17	0.1	0.223607	0.1	0.377645	-0.177645	5		0.01	0.0223607	0.01	0.0377645	-0.0177645	5
7.25	0	0	0	0	0	5		0.13	0.156525	0.07	0.324351	-0.0643512	5
7.33	0	0	0	0	0	5		0.17	0.236114	0.105594	0.463175	-0.123175	5
7.42	0.09	0.151658	0.0678233	0.278308	-0.0983077	5		0.1	0.223607	0.1	0.377645	-0.177645	5
7.5	0.22	0.175357	0.0784219	0.437734	0.0022658	5		0	0	0	0	0	5
7.58	0.22	0.349285	0.156205	0.653695	-0.213695	5		0.32	0.541526	0.242178	0.992393	-0.352393	5
7.67	0.21	0.31305	0.14	0.598702	-0.178702	5		0.14	0.260768	0.116619	0.463786	-0.183786	5
7.75	0	0	0	0	0	5		0.1	0.15411	0.0689202	0.291353	-0.0913533	5
7.83	0.01	0.0223607	0.01	0.0377645	-0.0177645	5		0	0	0	0	0	5
7.92	0.21	0.469574	0.21	0.793053	-0.373053	5		0.04	0.0894427	0.04	0.151058	-0.0710578	5
8	0.03	0.0447214	0.02	0.0855289	-0.0255289	5		0.38	0.464489	0.207726	0.956739	-0.196739	5
8.08	0.21	0.347131	0.155242	0.64102	-0.22102	5		0.07	0.130384	0.0583095	0.231893	-0.0918932	5
8.17	0.12	0.144049	0.0644205	0.29886	-0.05886	5		0	0	0	0	0	5
8.25	0.062	0.0687023	0.0307246	0.147305	-0.0233051	5		0.24	0.536656	0.24	0.906347	-0.426347	5
8.33	0.08	0.083666	0.0374166	0.183885	-0.0238851	5		0.04	0.065192	0.0291548	0.120947	-0.0409466	5
8.42	0.02	0.0447214	0.02	0.0755289	-0.0355289	5		0.32	0.439602	0.196596	0.865838	-0.225838	5
8.5	0.12	0.268328	0.12	0.453173	-0.213173	5		0	0	0	0	0	5
8.58	0	0	0	0	0	5		0.06	0.134164	0.06	0.226587	-0.106587	5
8.67	0.03	0.0447214	0.02	0.0855289	-0.0255289	5		0.56	1.2522	0.56	2.11481	-0.994809	5
8.75	0.19	0.324808	0.145258	0.593302	-0.213302	5		0.04	0.0894427	0.04	0.151058	-0.0710578	5
8.83	0.4	0.62849	0.281069	1.18037	-0.380374	5		0.05	0.0866025	0.0387298	0.157531	-0.0575313	5
8.92	0.25	0.351781	0.157321	0.686794	-0.186794	5		0	0	0	0	0	5
9	0.05	0.111803	0.05	0.188822	-0.0888223	5		0.14	0.155724	0.0696419	0.333357	-0.053357	5
9.08	0.03	0.0447214	0.02	0.0855289	-0.0255289	5		0.2	0.3937	0.176068	0.688844	-0.288844	5
9.17	0	0	0	0	0	5		0.06	0.0894427	0.04	0.171058	-0.0510578	5
9.25	0.25	0.364005	0.162788	0.701973	-0.201973	5		0.05	0.111803	0.05	0.188822	-0.0888223	5
9.33	0.13	0.164317	0.0734847	0.334026	-0.0740262	5		0.24	0.4114	0.183984	0.750821	-0.270821	5
9.42	0.1	0.223607	0.1	0.377645	-0.177645	5		0.08	0.130384	0.0583095	0.241893	-0.0818932	5
9.5	0.13	0.178885	0.08	0.352116	-0.0921156	5		0.02	0.0447214	0.02	0.0755289	-0.0355289	5
9.58	0.24	0.536656	0.24	0.906347	-0.426347	5		0.23	0.338378	0.151327	0.650152	-0.190152	5
9.67	0.2	0.365718	0.163554	0.654099	-0.254099	5		0.152	0.2545	0.113816	0.468003	-0.164003	5
9.75	0.06	0.134164	0.06	0.226587	-0.106587	5		0.04	0.0894427	0.04	0.151058	-0.0710578	5
9.83	0.02	0.0447214	0.02	0.0755289	-0.0355289	5		0.23	0.299166	0.133791	0.601463	-0.141463	5
9.92	0.04	0.065192	0.0291548	0.120947	-0.0409466	5		0.32	0.297069	0.132853	0.68886	-0.0488599	5
10	0	0	0	0	0	5		0.17	0.281957	0.126095	0.520096	-0.180096	5
10.08	0.14	0.31305	0.14	0.528702	-0.248702	5		0	0	0	0	0	5
10.17	0.22	0.389872	0.174356	0.70409	-0.26409	5		0.02	0.0447214	0.02	0.0755289	-0.0355289	5
10.25	0.17	0.238747	0.106771	0.466443	-0.126443	5		0.14	0.204328	0.0913783	0.393707	-0.113707	5
10.33	0.41	0.49295	0.220454	1.02208	-0.202079	5		0.15	0.158114	0.0707107	0.346324	-0.0463243	5
10.42	0.38	0.549545	0.245764	1.06235	-0.302351	5		0.09	0.119373	0.0533854	0.238222	-0.0582216	5
10.5	0.02	0.0447214	0.02	0.0755289	-0.0355289	5		0.25	0.559017	0.25	0.944111	-0.444111	5
10.58	0.24	0.429244	0.191964	0.772976	-0.292976	5		0.11	0.194936	0.087178	0.352045	-0.132045	5
10.67	0.46	0.478801	0.214126	1.05451	-0.134509	5		0.11	0.151658	0.0678233	0.298308	-0.0783077	5
10.75	0.2	0.3937	0.176068	0.688844	-0.288844	5		0.15	0.33541	0.15	0.566467	-0.266467	5
10.83	0.3	0.289396	0.129422	0.659332	-0.0593325	5		0.39	0.76518	0.342199	1.3401	-0.560096	5
10.92	0.536	0.341658	0.152794	0.960224	0.111776	5		0.11	0.151658	0.0678233	0.298308	-0.0783077	5
11	0.37	0.109545	0.0489898	0.506017	0.233983	5		0.04	0.0894427	0.04	0.151058	-0.0710578	5
11.08	0.11	0.219089	0.0979796	0.382035	-0.162035	5		0.1	0.173205	0.0774597	0.315063	-0.115063	5
11.17	0.16	0.119373	0.0533854	0.308222	0.0117784	5		0.04	0.0547723	0.0244949	0.108009	-0.0280087	5
11.25	0.27	0.363318	0.162481	0.721119	-0.181119	5		0.14	0.178185	0.0796869	0.361246	-0.0812463	5
11.33	0.27	0.216795	0.0969536	0.539186	0.00081366	5		0.27	0.338378	0.151327	0.690152	-0.150152	5
11.42	0.31	0.427785	0.191311	0.841165	-0.221165	5		0.462	0.527229	0.235784	1.11664	-0.192641	5
11.5	0	0	0	0	0	5		0.26	0.55385	0.247689	0.947696	-0.427696	5
11.58	0.19	0.424853	0.19	0.717525	-0.337525	5		0.07	0.067082	0.03	0.153293	-0.0132934	5
11.67	0.29	0.311047	0.139104	0.676215	-0.0962154	5		0.67	1.0704	0.478696	1.99907	-0.659074	5
11.75	0.88	0.806691	0.360763	1.88164	-0.121639	5		0.59	0.641677	0.286967	1.38675	-0.206748	5
11.83	0.83	0.602702	0.269537	1.57835	0.0816463	5		0.44	0.518893	0.232056	1.08429	-0.204291	5
11.92	0.31	0.531977	0.237908	0.970537	-0.350537	5		0.27	0.349285	0.156205	0.703695	-0.163695	5
12	0.86	1.51261	0.676461	2.73816	-1.01816	5		0.55	0.788987	0.352846	1.52966	-0.429656	5
12.08	0.21	0.415933	0.186011	0.726449	-0.306449	5		0.36	0.417433	0.186682	0.878311	-0.158311	5
12.17	0.47	0.533385	0.238537	1.13229	-0.192285	5		0.46	0.454698	0.203347	1.02458	-0.104582	5
12.25	0.49	0.474868	0.212368	1.07963	-0.099627	5		0.4	0.509902	0.228035	1.03313	-0.233127	5
12.33	0.76	0.945648	0.422907	1.93418	-0.414177	5		0.12	0.268328	0.12	0.453173	-0.213173	5
12.42	0.73	0.862844	0.385876	1.80136	-0.341362	5		0.22	0.279732	0.1251	0.567333	-0.127333	5
12.5	0.43	0.589067	0.263439	1.16142	-0.301423	5		0	0	0	0	0	5
12.58	0.38	0.527494	0.235903	1.03497	-0.27497	5		0	0	0	0	0	5
12.67	0.34	0.437893	0.195832	0.883716	-0.203716	5		0.01	0.0223607	0.01	0.0377645	-0.0177645	5
12.75	0.27	0.327109	0.146287	0.676159	-0.136159	5		0.03	0.067082	0.03	0.113293	-0.0532934	5
12.83	0.07	0.156525	0.07	0.264351	-0.124351	5		0	0	0	0	0	5
12.92	0.2	0.276134	0.123491	0.542866	-0.142866	5		0.13	0.290689	0.13	0.490938	-0.230938	5
13	0.27	0.603738	0.27	1.01964	-0.47964	5		0.04	0.0894427	0.04	0.151058	-0.0710578	5
13.08	0.02	0.0447214	0.02	0.0755289	-0.0355289	5		0.22	0.491935	0.22	0.830818	-0.390818	5
13.17	0.1	0.223607	0.1	0.377645	-0.177645	5		0.24	0.426321	0.190657	0.769348	-0.289348	5
13.25	0.18	0.402492	0.18	0.67976	-0.31976	5		0.22	0.491935	0.22	0.830818	-0.390818	5
13.33	0.17	0.236114	0.105594	0.463175	-0.123175	5		0	0	0	0	0	5
13.42	0.14	0.28592	0.127867	0.495016	-0.215016	5		0.02	0.0447214	0.02	0.0755289	-0.0355289	5
13.5	0	0	0	0	0	5		0	0	0	0	0	5
13.58	0.022	0.0491935	0.022	0.0830818	-0.0390818	5		0.01	0.0223607	0.01	0.0377645	-0.0177645	5
13.67	0	0	0	0	0	5		0.01	0.0223607	0.01	0.0377645	-0.0177645	5
13.75	0	0	0	0	0	5		0.05	0.111803	0.05	0.188822	-0.0888223	5
13.83	0	0	0	0	0	5		0.02	0.0447214	0.02	0.0755289	-0.0355289	5
13.92	0	0	0	0	0	5		0.18	0.402492	0.18	0.67976	-0.31976	5
14	0	0	0	0	0	5		0.062	0.056745	0.0253772	0.132458	-0.00845828	5
14.08	0.1	0.223607	0.1	0.377645	-0.177645	5		0.13	0.148324	0.0663325	0.314169	-0.0541685	5
14.17	0	0	0	0	0	5		0	0	0	0	0	5
14.25	0.01	0.0223607	0.01	0.0377645	-0.0177645	5		0	0	0	0	0	5
14.33	0	0	0	0	0	5		0.21	0.347131	0.155242	0.64102	-0.22102	5
14.42	0	0	0	0	0	5		0.18	0.402492	0.18	0.67976	-0.31976	5
14.5	0	0	0	0	0	5		0.04	0.0894427	0.04	0.151058	-0.0710578	5
14.58	0	0	0	0	0	5		0.01	0.0223607	0.01	0.0377645	-0.0177645	5
14.67	0	0	0	0	0	5		0.01	0.0223607	0.01	0.0377645	-0.0177645	5
14.75	0	0	0	0	0	5		0	0	0	0	0	5
14.83	0.24	0.536656	0.24	0.906347	-0.426347	5		0	0	0	0	0	5
14.92	0	0	0	0	0	5		0	0	0	0	0	5
15	0.05	0.0707107	0.0316228	0.137799	-0.0377989	5		0	0	0	0	0	5
15.08	0.01	0.0223607	0.01	0.0377645	-0.0177645	5		0.13	0.290689	0.13	0.490938	-0.230938	5
15.17	0	0	0	0	0	5		0	0	0	0	0	5
15.25	0.02	0.0447214	0.02	0.0755289	-0.0355289	5		0.02	0.0447214	0.02	0.0755289	-0.0355289	5
15.33	0	0	0	0	0	5		0	0	0	0	0	5
15.42	0	0	0	0	0	5		0	0	0	0	0	5
15.5	0	0	0	0	0	5		0.01	0.0223607	0.01	0.0377645	-0.0177645	5
15.58	0	0	0	0	0	5		0	0	0	0	0	5
15.67	0	0	0	0	0	5		0.01	0.0223607	0.01	0.0377645	-0.0177645	5
15.75	0.09	0.174642	0.0781025	0.306847	-0.126847	5		0	0	0	0	0	5
15.83	0.02	0.0447214	0.02	0.0755289	-0.0355289	5		0	0	0	0	0	5
15.92	0.04	0.065192	0.0291548	0.120947	-0.0409466	5		0	0	0	0	0	5
16	0	0	0	0	0	5		0.1	0.136931	0.0612372	0.270022	-0.0700218	5
16.08	0.05	0.111803	0.05	0.188822	-0.0888223	5		0.07	0.156525	0.07	0.264351	-0.124351	5
16.17	0.02	0.0447214	0.02	0.0755289	-0.0355289	5		0.03	0.067082	0.03	0.113293	-0.0532934	5
16.25	0.14	0.204328	0.0913783	0.393707	-0.113707	5		0.08	0.178885	0.08	0.302116	-0.142116	5
16.33	0	0	0	0	0	5		0.02	0.0447214	0.02	0.0755289	-0.0355289	5
16.42	0.02	0.0447214	0.02	0.0755289	-0.0355289	5		0.07	0.0974679	0.043589	0.191022	-0.0510224	5
16.5	0.11	0.245967	0.11	0.415409	-0.195409	5		0.03	0.067082	0.03	0.113293	-0.0532934	5
16.58	0	0	0	0	0	5		0	0	0	0	0	5
16.67	0	0	0	0	0	5		0	0	0	0	0	5
16.75	0	0	0	0	0	5		0	0	0	0	0	5
16.83	0	0	0	0	0	5		0	0	0	0	0	5
16.92	0	0	0	0	0	5		0	0	0	0	0	5
17	0	0	0	0	0	5		0	0	0	0	0	5
17.08	0.04	0.0894427	0.04	0.151058	-0.0710578	5		0	0	0	0	0	5
17.17	0.07	0.0974679	0.043589	0.191022	-0.0510224	5		0	0	0	0	0	5
17.25	0	0	0	0	0	5		0.01	0.0223607	0.01	0.0377645	-0.0177645	5
17.33	0.06	0.134164	0.06	0.226587	-0.106587	5		0	0	0	0	0	5
17.42	0.03	0.067082	0.03	0.113293	-0.0532934	5		0	0	0	0	0	5
17.5	0	0	0	0	0	5		0.01	0.0223607	0.01	0.0377645	-0.0177645	5
17.58	0	0	0	0	0	5		0	0	0	0	0	5
17.67	0	0	0	0	0	5		0.03	0.067082	0.03	0.113293	-0.0532934	5
17.75	0.04	0.0894427	0.04	0.151058	-0.0710578	5		0.02	0.0447214	0.02	0.0755289	-0.0355289	5
17.83	0	0	0	0	0	5		0.02	0.0447214	0.02	0.0755289	-0.0355289	5
17.92	0.04	0.0894427	0.04	0.151058	-0.0710578	5		0	0	0	0	0	5
18	0	0	0	0	0	5		0	0	0	0	0	5
18.08	0.02	0.0447214	0.02	0.0755289	-0.0355289	5		0	0	0	0	0	5
18.17	0	0	0	0	0	5		0.15	0.33541	0.15	0.566467	-0.266467	5
18.25	0	0	0	0	0	5		0.02	0.0447214	0.02	0.0755289	-0.0355289	5
18.33	0.02	0.0273861	0.0122474	0.0540044	-0.0140044	5		0.02	0.0447214	0.02	0.0755289	-0.0355289	5
18.42	0.02	0.0447214	0.02	0.0755289	-0.0355289	5		0.02	0.0447214	0.02	0.0755289	-0.0355289	5
18.5	0.07	0.156525	0.07	0.264351	-0.124351	5		0	0	0	0	0	5
18.58	0.3	0.541987	0.242384	0.972966	-0.372966	5		0	0	0	0	0	5
18.67	0.02	0.0447214	0.02	0.0755289	-0.0355289	5		0.07	0.130384	0.0583095	0.231893	-0.0918932	5
18.75	0	0	0	0	0	5		0	0	0	0	0	5
18.83	0.02	0.0447214	0.02	0.0755289	-0.0355289	5		0.07	0.130384	0.0583095	0.231893	-0.0918932	5
18.92	0.13	0.185742	0.0830662	0.360629	-0.100629	5		0.18	0.347491	0.155403	0.611467	-0.251467	5
19	0.09	0.174642	0.0781025	0.306847	-0.126847	5		0.1	0.223607	0.1	0.377645	-0.177645	5
19.08	0	0	0	0	0	5		0.03	0.067082	0.03	0.113293	-0.0532934	5
19.17	0	0	0	0	0	5		0	0	0	0	0	5
19.25	0	0	0	0	0	5		0	0	0	0	0	5
19.33	0	0	0	0	0	5		0	0	0	0	0	5
19.42	0	0	0	0	0	5		0.14	0.260768	0.116619	0.463786	-0.183786	5
19.5	0	0	0	0	0	5		0.01	0.0223607	0.01	0.0377645	-0.0177645	5
19.58	0.01	0.0223607	0.01	0.0377645	-0.0177645	5		0.24	0.43359	0.193907	0.778373	-0.298373	5
19.67	0	0	0	0	0	5		0.11	0.219089	0.0979796	0.382035	-0.162035	5
19.75	0	0	0	0	0	5		0	0	0	0	0	5
19.83	0	0	0	0	0	5		0	0	0	0	0	5
19.92	0	0	0	0	0	5		0.02	0.0447214	0.02	0.0755289	-0.0355289	5
20	0	0	0	0	0	5		0	0	0	0	0	5
20.08	0.01	0.0223607	0.01	0.0377645	-0.0177645	5		0	0	0	0	0	5
20.17	0.07	0.109545	0.0489898	0.206017	-0.0660175	5		0	0	0	0	0	5
20.25	0.14	0.260768	0.116619	0.463786	-0.183786	5		0	0	0	0	0	5
20.33	0	0	0	0	0	5		0.01	0.0223607	0.01	0.0377645	-0.0177645	5
20.42	0.27	0.435316	0.194679	0.810516	-0.270516	5		0	0	0	0	0	5
20.5	0.29	0.232916	0.104163	0.579204	0.000796223	5		0.13	0.178885	0.08	0.352116	-0.0921156	5
20.58	0.17	0.303315	0.135647	0.546615	-0.206615	5		0.04	0.0894427	0.04	0.151058	-0.0710578	5
20.67	0.26	0.43359	0.193907	0.798373	-0.278373	5		0.18	0.321325	0.143701	0.578978	-0.218978	5
20.75	0.02	0.0447214	0.02	0.0755289	-0.0355289	5		0.4	0.380789	0.170294	0.872812	-0.0728116	5
20.83	0.09	0.201246	0.09	0.33988	-0.15988	5		0	0	0	0	0	5
20.92	0.02	0.0447214	0.02	0.0755289	-0.0355289	5		0.06	0.0894427	0.04	0.171058	-0.0510578	5
21	0	0	0	0	0	5		0.16	0.191703	0.0857321	0.398031	-0.0780306	5
21.08	0	0	0	0	0	5		0.02	0.0447214	0.02	0.0755289	-0.0355289	5
21.17	0.06	0.134164	0.06	0.226587	-0.106587	5		0.02	0.0447214	0.02	0.0755289	-0.0355289	5
21.25	0	0	0	0	0	5		0.01	0.0223607	0.01	0.0377645	-0.0177645	5
21.33	0	0	0	0	0	5		0.03	0.067082	0.03	0.113293	-0.0532934	5
21.42	0	0	0	0	0	5		0.01	0.0223607	0.01	0.0377645	-0.0177645	5
21.5	0	0	0	0	0	5		0	0	0	0	0	5
21.58	0.05	0.111803	0.05	0.188822	-0.0888223	5		0	0	0	0	0	5
21.67	0.03	0.067082	0.03	0.113293	-0.0532934	5		0.05	0.111803	0.05	0.188822	-0.0888223	5
21.75	0	0	0	0	0	5		0.01	0.0223607	0.01	0.0377645	-0.0177645	5
21.83	0.11	0.245967	0.11	0.415409	-0.195409	5		0	0	0	0	0	5
21.92	0.05	0.111803	0.05	0.188822	-0.0888223	5		0.02	0.0447214	0.02	0.0755289	-0.0355289	5
22	0	0	0	0	0	5		0.06	0.0894427	0.04	0.171058	-0.0510578	5
22.08	0.06	0.134164	0.06	0.226587	-0.106587	5		0.04	0.0894427	0.04	0.151058	-0.0710578	5
22.17	0	0	0	0	0	5		0.07	0.156525	0.07	0.264351	-0.124351	5
22.25	0.06	0.134164	0.06	0.226587	-0.106587	5		0.15	0.33541	0.15	0.566467	-0.266467	5
22.33	0	0	0	0	0	5		0	0	0	0	0	5
22.42	0	0	0	0	0	5		0	0	0	0	0	5
22.5	0	0	0	0	0	5		0.06	0.108397	0.0484768	0.194593	-0.0745932	5
22.58	0	0	0	0	0	5		0.03	0.0447214	0.02	0.0855289	-0.0255289	5
22.67	0	0	0	0	0	5		0.02	0.0447214	0.02	0.0755289	-0.0355289	5
22.75	0	0	0	0	0	5		0	0	0	0	0	5
22.83	0.17	0.380132	0.17	0.641996	-0.301996	5		0.02	0.0447214	0.02	0.0755289	-0.0355289	5
22.92	0.05	0.111803	0.05	0.188822	-0.0888223	5		0.06	0.0821584	0.0367423	0.162013	-0.0420131	5
23	0.26	0.272489	0.121861	0.598339	-0.0783392	5		0.03	0.067082	0.03	0.113293	-0.0532934	5
23.08	0.01	0.0223607	0.01	0.0377645	-0.0177645	5		0	0	0	0	0	5
23.17	0.03	0.067082	0.03	0.113293	-0.0532934	5		0.03	0.0447214	0.02	0.0855289	-0.0255289	5
23.25	0.02	0.0447214	0.02	0.0755289	-0.0355289	5		0.13	0.148324	0.0663325	0.314169	-0.0541685	5
23.33	0.27	0.576194	0.257682	0.98544	-0.44544	5		0.16	0.302903	0.135462	0.536103	-0.216103	5
23.42	0	0	0	0	0	5		0.01	0.0223607	0.01	0.0377645	-0.0177645	5
23.5	0.21	0.469574	0.21	0.793053	-0.373053	5		0.11	0.219089	0.0979796	0.382035	-0.162035	5
23.58	0.05	0.0707107	0.0316228	0.137799	-0.0377989	5		0	0	0	0	0	5
23.67	0.07	0.109545	0.0489898	0.206017	-0.0660175	5		0	0	0	0	0	5
23.75	0.18	0.402492	0.18	0.67976	-0.31976	5		0.18	0.402492	0.18	0.67976	-0.31976	5
23.83	0.2	0.273861	0.122474	0.540044	-0.140044	5		0.11	0.245967	0.11	0.415409	-0.195409	5
23.92	0.18	0.303315	0.135647	0.556615	-0.196615	5		0.04	0.0894427	0.04	0.151058	-0.0710578	5
24	0.03	0.067082	0.03	0.113293	-0.0532934	5		0.07	0.156525	0.07	0.264351	-0.124351	5
24.08	0	0	0	0	0	5		0.02	0.0447214	0.02	0.0755289	-0.0355289	5
24.17	0.14	0.204328	0.0913783	0.393707	-0.113707	5		0.04	0.0894427	0.04	0.151058	-0.0710578	5
24.25	0.09	0.134164	0.06	0.256587	-0.0765867	5		0.02	0.0447214	0.02	0.0755289	-0.0355289	5
24.33	0.02	0.0273861	0.0122474	0.0540044	-0.0140044	5		0	0	0	0	0	5
24.42	0.01	0.0223607	0.01	0.0377645	-0.0177645	5		0	0	0	0	0	5
24.5	0.3	0.447214	0.2	0.855289	-0.255289	5		0.03	0.067082	0.03	0.113293	-0.0532934	5
24.58	0.05	0.111803	0.05	0.188822	-0.0888223	5		0	0	0	0	0	5
24.67	0.29	0.300832	0.134536	0.663532	-0.0835325	5		0.01	0.0223607	0.01	0.0377645	-0.0177645	5
24.75	0.07	0.0974679	0.043589	0.191022	-0.0510224	5		0	0	0	0	0	5
24.83	0.12	0.268328	0.12	0.453173	-0.213173	5		0.05	0.111803	0.05	0.188822	-0.0888223	5
24.92	0.06	0.134164	0.06	0.226587	-0.106587	5		0.04	0.0894427	0.04	0.151058	-0.0710578	5
25	0	0	0	0	0	5		0.17	0.204939	0.0916515	0.424465	-0.0844654	5
25.08	0.37	0.399375	0.178606	0.865889	-0.125889	5		0.21	0.213307	0.0953939	0.474856	-0.054856	5
25.17	0.33	0.307409	0.137477	0.711698	-0.0516981	5		0.02	0.0447214	0.02	0.0755289	-0.0355289	5
25.25	0.55	0.617454	0.276134	1.31667	-0.216671	5		0.34	0.547037	0.244643	1.01924	-0.339237	5
25.33	0.07	0.130384	0.0583095	0.231893	-0.0918932	5		0.67	0.476445	0.213073	1.26158	0.0784152	5
25.42	0.38	0.608892	0.272305	1.13604	-0.37604	5		0.78	0.459075	0.205305	1.35002	0.209983	5
25.5	0.49	0.466905	0.208806	1.06974	-0.0897388	5		0.16	0.33053	0.147817	0.570407	-0.250407	5
25.58	0.38	0.35812	0.160156	0.824665	-0.0646648	5		0.42	0.559687	0.2503	1.11494	-0.274944	5
25.67	0.15	0.111803	0.05	0.288822	0.0111777	5		0.518	0.762312	0.340916	1.46454	-0.428536	5
25.75	0.42	0.321325	0.143701	0.818978	0.0210218	5		0.5	0.655744	0.293258	1.31421	-0.314214	5
25.83	0.17	0.192354	0.0860233	0.408839	-0.0688388	5		0.45	0.545436	0.243926	1.12725	-0.227248	5
25.92	0.74	0.879915	0.39351	1.83256	-0.352558	5		1.08	0.873642	0.390704	2.16477	-0.00476957	5
26	0.608	0.785697	0.351374	1.58357	-0.367572	5		0.28	0.456344	0.204083	0.846626	-0.286626	5
26.08	1.21	0.909258	0.406633	2.33899	0.0810072	5		0.76	0.928978	0.415452	1.91348	-0.393478	5
26.17	0.3	0.375832	0.168077	0.766658	-0.166658	5		0.35	0.504975	0.225832	0.97701	-0.27701	5
26.25	0.408	0.245601	0.109836	0.712954	0.103046	5		0.07	0.0974679	0.043589	0.191022	-0.0510224	5
26.33	0.18	0.225278	0.100747	0.459719	-0.0997191	5		0.5	0.337268	0.150831	0.918774	0.0812259	5
26.42	0.49	0.43359	0.193907	1.02837	-0.0483727	5		0.49	0.395917	0.177059	0.981595	-0.00159546	5
26.5	0.66	0.50547	0.226053	1.28762	0.032376	5		0.48	0.463141	0.207123	1.05507	-0.0950661	5
26.58	0.51	0.870632	0.389358	1.59103	-0.571032	5		0.29	0.497996	0.222711	0.908344	-0.328344	5
26.67	0.36	0.461519	0.206398	0.933052	-0.213052	5		0.27	0.373497	0.167033	0.733758	-0.193758	5
26.75	0.5	0.730582	0.326726	1.40714	-0.407137	5		0.34	0.318983	0.142653	0.736069	-0.0560694	5
26.83	0.25	0.504975	0.225832	0.87701	-0.37701	5		0.54	0.661816	0.295973	1.36175	-0.281753	5
26.92	0.76	0.840684	0.375965	1.80385	-0.283847	5		0.17	0.222486	0.0994987	0.446253	-0.106253	5
27	0.42	0.559687	0.2503	1.11494	-0.274944	5		0.49	0.571621	0.255636	1.19976	-0.219761	5
27.08	0.2	0.280624	0.125499	0.548441	-0.148441	5		0.1	0.15411	0.0689202	0.291353	-0.0913533	5
27.17	0.51	0.412916	0.184662	1.0227	-0.0027035	5		0.08	0.115109	0.0514782	0.222926	-0.0629263	5
27.25	0.25	0.479583	0.214476	0.845481	-0.345481	5		0.16	0.260768	0.116619	0.483786	-0.163786	5
27.33	0.02	0.0447214	0.02	0.0755289	-0.0355289	5		0.07	0.156525	0.07	0.264351	-0.124351	5
27.42	0.3	0.643234	0.287663	1.09868	-0.498681	5		0.22	0.491935	0.22	0.830818	-0.390818	5
27.5	0.09	0.201246	0.09	0.33988	-0.15988	5		0.27	0.363318	0.162481	0.721119	-0.181119	5
27.58	0.27	0.340221	0.152151	0.69244	-0.15244	5		0.04	0.065192	0.0291548	0.120947	-0.0409466	5
27.67	0.22	0.305369	0.136565	0.599165	-0.159165	5		0.48	0.890646	0.398309	1.58588	-0.625883	5
27.75	0.17	0.228035	0.10198	0.453143	-0.113143	5		0.37	0.340221	0.152151	0.79244	-0.0524396	5
27.83	0.14	0.28592	0.127867	0.495016	-0.215016	5		0.37	0.375167	0.16778	0.835831	-0.0958309	5
27.92	0.11	0.114018	0.0509902	0.251571	-0.0315715	5		0.36	0.494217	0.22102	0.973651	-0.253651	5
28	0.31	0.512835	0.229347	0.946769	-0.326769	5		0.55	0.573367	0.256418	1.26193	-0.161929	5
28.08	0.43	0.396232	0.1772	0.921987	-0.0619873	5		0.33	0.410183	0.183439	0.839309	-0.179309	5
28.17	0.42	0.500749	0.223942	1.04176	-0.201763	5		0.32	0.486826	0.217715	0.924475	-0.284475	5
28.25	0.63	0.446654	0.19975	1.18459	0.0754055	5		0.34	0.378153	0.169115	0.809539	-0.129539	5
28.33	0.18	0.238747	0.106771	0.476443	-0.116443	5		0.49	0.63777	0.285219	1.2819	-0.301895	5
28.42	0.33	0.46179	0.206519	0.903388	-0.243388	5		0.69	0.896103	0.400749	1.80266	-0.422658	5
28.5	0.28	0.368443	0.164773	0.737482	-0.177482	5		0.15	0.19685	0.0880341	0.394422	-0.0944218	5
28.58	0.06	0.134164	0.06	0.226587	-0.106587	5		0.27	0.393065	0.175784	0.758055	-0.218055	5
28.67	0.1	0.19685	0.0880341	0.344422	-0.144422	5		0.23	0.514296	0.23	0.868582	-0.408582	5
28.75	0.41	0.654217	0.292575	1.22232	-0.402318	5		0.31	0.587792	0.262869	1.03984	-0.419841	5
28.83	0.14	0.194936	0.087178	0.382045	-0.102045	5		0.47	0.794198	0.355176	1.45613	-0.516127	5
28.92	0.77	1.05333	0.471063	2.07788	-0.53788	5		0.07	0.0974679	0.043589	0.191022	-0.0510224	5
29	0.23	0.301247	0.134722	0.604048	-0.144048	5		0.25	0.35	0.156525	0.684582	-0.184582	5
29.08	0.27	0.284165	0.127083	0.622838	-0.082838	5		0.05	0.111803	0.05	0.188822	-0.0888223	5
29.17	0.39	0.468241	0.209404	0.971398	-0.191398	5		0.55	0.320156	0.143178	0.947526	0.152474	5
29.25	0.02	0.0447214	0.02	0.0755289	-0.0355289	5		0.34	0.679522	0.303891	1.18374	-0.503738	5
29.33	0.42	0.443847	0.198494	0.971109	-0.131109	5		0.24	0.336155	0.150333	0.657391	-0.177391	5
29.42	0.11	0.167332	0.0748331	0.31777	-0.0977701	5		0.61	0.829458	0.370945	1.63991	-0.419908	5
29.5	0.08	0.130384	0.0583095	0.241893	-0.0818932	5		0.25	0.3937	0.176068	0.738844	-0.238844	5
29.58	0.39	0.470903	0.210594	0.974704	-0.194704	5		0.08	0.15248	0.0681909	0.269328	-0.109328	5
29.67	0.18	0.195576	0.0874643	0.42284	-0.0628398	5		0.05	0.0707107	0.0316228	0.137799	-0.0377989	5
29.75	0.07	0.103682	0.0463681	0.198738	-0.0587385	5		0.45	0.280624	0.125499	0.798441	0.101559	5
29.83	0.23	0.460435	0.205913	0.801705	-0.341705	5		0.2	0.27157	0.12145	0.537198	-0.137198	5
29.92	0.37	0.376829	0.168523	0.837895	-0.0978948	5		0.07	0.109545	0.0489898	0.206017	-0.0660175	5
30	0.45	0.604152	0.270185	1.20015	-0.300154	5		0.12	0.160468	0.0717635	0.319247	-0.0792474	5
30.08	0.18	0.248998	0.111355	0.489172	-0.129172	5		0.52	1.0797	0.482856	1.86062	-0.820623	5
30.17	0.59	0.881334	0.394145	1.68432	-0.504321	5		0.16	0.204328	0.0913783	0.413707	-0.0937069	5
30.25	0.37	0.589067	0.263439	1.10142	-0.361423	5		0.04	0.0894427	0.04	0.151058	-0.0710578	5
30.33	0.1	0.11726	0.0524404	0.245598	-0.045598	5		0.08	0.178885	0.08	0.302116	-0.142116	5
30.42	0.36	0.322878	0.144395	0.760906	-0.0409056	5		0.25	0.314245	0.140535	0.640187	-0.140187	5
30.5	0.29	0.366401	0.16386	0.744947	-0.164947	5		0.28	0.189077	0.0845577	0.51477	0.0452303	5
30.58	0.186	0.19995	0.0894204	0.434271	-0.0622707	5		0.4	0.555653	0.248495	1.08993	-0.289934	5
30.67	0.62	0.879346	0.393256	1.71185	-0.471853	5		0.22	0.413219	0.184797	0.733079	-0.293079	5
30.75	0.32	0.465833	0.208327	0.898408	-0.258408	5		0.36	0.724051	0.323805	1.25903	-0.539028	5
30.83	0.43	0.612985	0.274135	1.19112	-0.331121	5		0.03	0.0447214	0.02	0.0855289	-0.0255289	5
30.92	0	0	0	0	0	5		0.43	0.591185	0.264386	1.16405	-0.304053	5
31	0.28	0.397806	0.177904	0.773942	-0.213942	5		0.07	0.0974679	0.043589	0.191022	-0.0510224	5
31.08	0.27	0.521536	0.233238	0.917573	-0.377573	5		0.53	1.07506	0.480781	1.86486	-0.804861	5
31.17	0.1	0.15411	0.0689202	0.291353	-0.0913533	5		0.28	0.400936	0.179304	0.777828	-0.217828	5
31.25	0.04	0.0894427	0.04	0.151058	-0.0710578	5		0.22	0.228035	0.10198	0.503143	-0.063143	5
31.33	0.12	0.144049	0.0644205	0.29886	-0.05886	5		0.18	0.294958	0.131909	0.546238	-0.186238	5
31.42	0.29	0.458803	0.205183	0.859679	-0.279679	5		0.02	0.0447214	0.02	0.0755289	-0.0355289	5
31.5	0.15	0.33541	0.15	0.566467	-0.266467	5		0.04	0.065192	0.0291548	0.120947	-0.0409466	5
31.58	0.03	0.067082	0.03	0.113293	-0.0532934	5		0.11	0.167332	0.0748331	0.31777	-0.0977701	5
31.67	0.12	0.195576	0.0874643	0.36284	-0.12284	5		0.06	0.134164	0.06	0.226587	-0.106587	5
31.75	0.15	0.15411	0.0689202	0.341353	-0.0413533	5		0.09	0.147479	0.0659545	0.273119	-0.0931191	5
31.83	0.05	0.05	0.0223607	0.112083	-0.0120832	5		0.01	0.0223607	0.01	0.0377645	-0.0177645	5
31.92	0.2	0.339116	0.151658	0.621069	-0.221069	5		0.04	0.0894427	0.04	0.151058	-0.0710578	5
32	0.21	0.415933	0.186011	0.726449	-0.306449	5		0.99	1.02859	0.46	2.26716	-0.287165	5
32.08	0	0	0	0	0	5		0.52	0.630079	0.28178	1.30235	-0.262347	5
32.17	0	0	0	0	0	5		0.3	0.562361	0.251496	0.998264	-0.398264	5
32.25	0.23	0.514296	0.23	0.868582	-0.408582	5		0.24	0.227486	0.101735	0.522462	-0.0424615	5
32.33	0.26	0.47355	0.211778	0.847991	-0.327991	5		0.03	0.0447214	0.02	0.0855289	-0.0255289	5
32.42	0.3	0.302076	0.135093	0.675077	-0.0750771	5		0.37	0.672309	0.300666	1.20478	-0.464782	5
32.5	0.25	0.559017	0.25	0.944111	-0.444111	5		0.06	0.0821584	0.0367423	0.162013	-0.0420131	5
32.58	0	0	0	0	0	5		0.27	0.402492	0.18	0.76976	-0.22976	5
32.67	0.14	0.219089	0.0979796	0.412035	-0.132035	5		0.17	0.185742	0.0830662	0.400629	-0.0606289	5
32.75	0.05	0.111803	0.05	0.188822	-0.0888223	5		0.04	0.0894427	0.04	0.151058	-0.0710578	5
32.83	0.13	0.238747	0.106771	0.426443	-0.166443	5		0.3	0.561249	0.250998	0.996882	-0.396882	5
32.92	0.03	0.0447214	0.02	0.0855289	-0.0255289	5		0.126	0.204402	0.0914112	0.379798	-0.127798	5
33	0.05	0.111803	0.05	0.188822	-0.0888223	5		0.02	0.0447214	0.02	0.0755289	-0.0355289	5
33.08	0	0	0	0	0	5		0	0	0	0	0	5
33.17	0.03	0.067082	0.03	0.113293	-0.0532934	5		0.16	0.227486	0.101735	0.442462	-0.122462	5
33.25	0.29	0.64846	0.29	1.09517	-0.515169	5		0.09	0.174642	0.0781025	0.306847	-0.126847	5
33.33	0.02	0.0273861	0.0122474	0.0540044	-0.0140044	5		0.08	0.178885	0.08	0.302116	-0.142116	5
33.42	0.43	0.854108	0.381969	1.49051	-0.630515	5		0.54	0.402182	0.179861	1.03937	0.0406256	5
33.5	0.3	0.410792	0.183712	0.810066	-0.210066	5		0.29	0.406817	0.181934	0.79513	-0.21513	5
33.58	0.01	0.0223607	0.01	0.0377645	-0.0177645	5		0.4	0.289396	0.129422	0.759332	0.0406675	5
33.67	0.26	0.527257	0.235797	0.914676	-0.394676	5		0.08	0.178885	0.08	0.302116	-0.142116	5
33.75	0.06	0.0821584	0.0367423	0.162013	-0.0420131	5		0.28	0.521536	0.233238	0.927573	-0.367573	5
33.83	0.25	0.365718	0.163554	0.704099	-0.204099	5		0.12	0.195576	0.0874643	0.36284	-0.12284	5
33.92	0.06	0.134164	0.06	0.226587	-0.106587	5		0.68	0.873642	0.390704	1.76477	-0.40477	5
34	0.05	0.0612372	0.0273861	0.126036	-0.0260361	5		0.3	0.369121	0.165076	0.758324	-0.158324	5
34.08	0.1	0.223607	0.1	0.377645	-0.177645	5		0.12	0.268328	0.12	0.453173	-0.213173	5
34.17	0.19	0.324808	0.145258	0.593302	-0.213302	5		0.48	0.555203	0.248294	1.16938	-0.209375	5
34.25	0.36	0.586728	0.262393	1.08852	-0.368519	5		0.18	0.225278	0.100747	0.459719	-0.0997191	5
34.33	0.06	0.108397	0.0484768	0.194593	-0.0745932	5		0.16	0.221923	0.0992472	0.435554	-0.115554	5
34.42	0.46	0.690471	0.308788	1.31733	-0.397333	5		0.19	0.318983	0.142653	0.586069	-0.206069	5
34.5	0.04	0.0894427	0.04	0.151058	-0.0710578	5		0.12	0.103682	0.0463681	0.248738	-0.00873846	5
34.58	0.25	0.364005	0.162788	0.701973	-0.201973	5		0.25	0.504975	0.225832	0.87701	-0.37701	5
34.67	0.11	0.219089	0.0979796	0.382035	-0.162035	5		0.19	0.232916	0.104163	0.479204	-0.0992038	5
34.75	0.23	0.315436	0.141067	0.621666	-0.161666	5		0.34	0.679522	0.303891	1.18374	-0.503738	5
34.83	0.39	0.530801	0.237382	1.04908	-0.269077	5		0.49	0.439318	0.196469	1.03548	-0.0554849	5
34.92	0.02	0.0447214	0.02	0.0755289	-0.0355289	5		0.05	0.111803	0.05	0.188822	-0.0888223	5
35	0.44	0.846611	0.378616	1.49121	-0.611206	5		0.45	0.978519	0.437607	1.66499	-0.764992	5
35.08	0.17	0.327109	0.146287	0.576159	-0.236159	5		0.38	0.610942	0.273222	1.13858	-0.378585	5
35.17	0.1	0.223607	0.1	0.377645	-0.177645	5		0.79	0.789303	0.352987	1.77005	-0.19005	5
35.25	0.04	0.0547723	0.0244949	0.108009	-0.0280087	5		0.15	0.308221	0.13784	0.532707	-0.232707	5
35.33	0.01	0.0223607	0.01	0.0377645	-0.0177645	5		0.11	0.219089	0.0979796	0.382035	-0.162035	5
35.42	0.27	0.435316	0.194679	0.810516	-0.270516	5		0.342	0.622953	0.278593	1.1155	-0.431498	5
35.5	0.62	0.608892	0.272305	1.37604	-0.13604	5		0.06	0.0894427	0.04	0.171058	-0.0510578	5
35.58	0.18	0.303315	0.135647	0.556615	-0.196615	5		0.19	0.270185	0.12083	0.525479	-0.145479	5
35.67	0.348	0.476991	0.213317	0.940262	-0.244262	5		0.2	0.276134	0.123491	0.542866	-0.142866	5
35.75	0.58	0.361594	0.16171	1.02898	0.131022	5		0.38	0.459075	0.205305	0.950017	-0.190017	5
35.83	0.33	0.368443	0.164773	0.787482	-0.127482	5		0.16	0.230217	0.102956	0.445853	-0.125853	5
35.92	0.47	0.414729	0.185472	0.984954	-0.0449539	5		0.48	0.464489	0.207726	1.05674	-0.0967392	5
36	0.45	0.357071	0.159687	0.893363	0.00663727	5		0.16	0.304959	0.136382	0.538657	-0.218657	5
36.08	0.24	0.227486	0.101735	0.522462	-0.0424615	5		0.18	0.349285	0.156205	0.613695	-0.253695	5
36.17	0.4	0.601041	0.268794	1.14629	-0.346291	5		0.31	0.361248	0.161555	0.758548	-0.138548	5
36.25	0.25	0.31225	0.139642	0.637709	-0.137709	5		0.95	0.947365	0.423674	2.12631	-0.226309	5
36.33	0.22	0.491935	0.22	0.830818	-0.390818	5		0.59	0.823408	0.368239	1.6124	-0.432396	5
36.42	0.08	0.130384	0.0583095	0.241893	-0.0818932	5		0.26	0.405278	0.181246	0.763219	-0.243219	5
36.5	0.47	0.616036	0.2755	1.23491	-0.294909	5		0.44	0.518893	0.232056	1.08429	-0.204291	5
36.58	0.38	0.671379	0.30025	1.21363	-0.453627	5		0.29	0.395917	0.177059	0.781595	-0.201595	5
36.67	0.13	0.290689	0.13	0.490938	-0.230938	5		0.33	0.452217	0.202237	0.891501	-0.231501	5
36.75	0.07	0.130384	0.0583095	0.231893	-0.0918932	5		0.116	0.203544	0.0910275	0.368733	-0.136733	5
36.83	0.3	0.509902	0.228035	0.933127	-0.333127	5		0.29	0.357771	0.16	0.734231	-0.154231	5
36.92	0.21	0.469574	0.21	0.793053	-0.373053	5		0.47	0.845281	0.378021	1.51956	-0.579555	5
37	0.21	0.347131	0.155242	0.64102	-0.22102	5		0.88	1.24629	0.55736	2.42748	-0.667479	5
37.08	0.01	0.0223607	0.01	0.0377645	-0.0177645	5		0.43	0.593296	0.26533	1.16667	-0.306674	5
37.17	0.12	0.268328	0.12	0.453173	-0.213173	5		0.64	0.750333	0.335559	1.57166	-0.291662	5
37.25	0.13	0.290689	0.13	0.490938	-0.230938	5		0.04	0.0894427	0.04	0.151058	-0.0710578	5
37.33	0.27	0.603738	0.27	1.01964	-0.47964	5		0.29	0.568331	0.254165	0.995676	-0.415676	5
37.42	0.16	0.221923	0.0992472	0.435554	-0.115554	5		0.03	0.067082	0.03	0.113293	-0.0532934	5
37.5	0.18	0.402492	0.18	0.67976	-0.31976	5		0	0	0	0	0	5
37.58	0.15	0.33541	0.15	0.566467	-0.266467	5		0	0	0	0	0	5
37.67	0.01	0.0223607	0.01	0.0377645	-0.0177645	5		0	0	0	0	0	5
37.75	0	0	0	0	0	5		0	0	0	0	0	5
37.83	0	0	0	0	0	5		0	0	0	0	0	5
37.92	0	0	0	0	0	5		0	0	0	0	0	5
38	0	0	0	0	0	5		0	0	0	0	0	5
38.08	0	0	0	0	0	5		0	0	0	0	0	5
38.17	0.02	0.0447214	0.02	0.0755289	-0.0355289	5		0	0	0	0	0	5
38.25	0	0	0	0	0	5		0.01	0.0223607	0.01	0.0377645	-0.0177645	5
38.33	0	0	0	0	0	5		0	0	0	0	0	5
38.42	0.07	0.156525	0.07	0.264351	-0.124351	5		0	0	0	0	0	5
38.5	0	0	0	0	0	5		0	0	0	0	0	5
38.58	0	0	0	0	0	5		0	0	0	0	0	5
38.67	0.11	0.245967	0.11	0.415409	-0.195409	5		0.03	0.067082	0.03	0.113293	-0.0532934	5
38.75	0	0	0	0	0	5		0.04	0.041833	0.0187083	0.0919425	-0.0119425	5
38.83	0.1	0.223607	0.1	0.377645	-0.177645	5		0	0	0	0	0	5
38.92	0.14	0.31305	0.14	0.528702	-0.248702	5		0.05	0.111803	0.05	0.188822	-0.0888223	5
39	0.37	0.506952	0.226716	0.999464	-0.259464	5		0	0	0	0	0	5
39.08	0	0	0	0	0	5		0	0	0	0	0	5
39.17	0	0	0	0	0	5		0	0	0	0	0	5
39.25	0.03	0.0447214	0.02	0.0855289	-0.0255289	5		0	0	0	0	0	5
39.33	0.09	0.201246	0.09	0.33988	-0.15988	5		0.01	0.0223607	0.01	0.0377645	-0.0177645	5
39.42	0.06	0.108397	0.0484768	0.194593	-0.0745932	5		0	0	0	0	0	5
39.5	0.04	0.065192	0.0291548	0.120947	-0.0409466	5		0.05	0.111803	0.05	0.188822	-0.0888223	5
39.58	0.02	0.0447214	0.02	0.0755289	-0.0355289	5		0	0	0	0	0	5
39.67	0.02	0.0447214	0.02	0.0755289	-0.0355289	5		0.13	0.290689	0.13	0.490938	-0.230938	5
39.75	0.1	0.223607	0.1	0.377645	-0.177645	5		0	0	0	0	0	5
39.83	0	0	0	0	0	5		0.01	0.0223607	0.01	0.0377645	-0.0177645	5
39.92	0	0	0	0	0	5		0	0	0	0	0	5
40	0	0	0	0	0	5		0	0	0	0	0	5
40.08	0	0	0	0	0	5		0	0	0	0	0	5
40.17	0	0	0	0	0	5		0	0	0	0	0	5
40.25	0.01	0.0223607	0.01	0.0377645	-0.0177645	5		0.01	0.0223607	0.01	0.0377645	-0.0177645	5
40.33	0	0	0	0	0	5		0.05	0.111803	0.05	0.188822	-0.0888223	5
40.42	0	0	0	0	0	5		0.02	0.0447214	0.02	0.0755289	-0.0355289	5
40.5	0	0	0	0	0	5		0	0	0	0	0	5
40.58	0	0	0	0	0	5		0	0	0	0	0	5
40.67	0.04	0.0894427	0.04	0.151058	-0.0710578	5		0	0	0	0	0	5
40.75	0.03	0.067082	0.03	0.113293	-0.0532934	5		0.03	0.067082	0.03	0.113293	-0.0532934	5
40.83	0.01	0.0223607	0.01	0.0377645	-0.0177645	5		0	0	0	0	0	5
40.92	0.02	0.0447214	0.02	0.0755289	-0.0355289	5		0	0	0	0	0	5
41	0	0	0	0	0	5		0	0	0	0	0	5
41.08	0	0	0	0	0	5		0	0	0	0	0	5
41.17	0.07	0.156525	0.07	0.264351	-0.124351	5		0	0	0	0	0	5
41.25	0	0	0	0	0	5		0.02	0.0447214	0.02	0.0755289	-0.0355289	5
41.33	0	0	0	0	0	5		0.01	0.0223607	0.01	0.0377645	-0.0177645	5
41.42	0	0	0	0	0	5		0	0	0	0	0	5
41.5	0	0	0	0	0	5		0.07	0.156525	0.07	0.264351	-0.124351	5
41.58	0	0	0	0	0	5		0.02	0.0447214	0.02	0.0755289	-0.0355289	5
41.67	0	0	0	0	0	5		0	0	0	0	0	5
41.75	0.01	0.0223607	0.01	0.0377645	-0.0177645	5		0.11	0.245967	0.11	0.415409	-0.195409	5
41.83	0.03	0.067082	0.03	0.113293	-0.0532934	5		0.05	0.111803	0.05	0.188822	-0.0888223	5
41.92	0.1	0.19685	0.0880341	0.344422	-0.144422	5		0.07	0.0758288	0.0339116	0.164154	-0.0241538	5
42	0.11	0.219089	0.0979796	0.382035	-0.162035	5		0	0	0	0	0	5
42.08	0.13	0.290689	0.13	0.490938	-0.230938	5		0	0	0	0	0	5
42.17	0.08	0.130384	0.0583095	0.241893	-0.0818932	5		0	0	0	0	0	5
42.25	0.06	0.134164	0.06	0.226587	-0.106587	5		0.02	0.0447214	0.02	0.0755289	-0.0355289	5
42.33	0	0	0	0	0	5		0.12	0.268328	0.12	0.453173	-0.213173	5
42.42	0	0	0	0	0	5		0.05	0.111803	0.05	0.188822	-0.0888223	5
42.5	0.04	0.0894427	0.04	0.151058	-0.0710578	5		0.03	0.067082	0.03	0.113293	-0.0532934	5
42.58	0	0	0	0	0	5		0.03	0.067082	0.03	0.113293	-0.0532934	5
42.67	0	0	0	0	0	5		0	0	0	0	0	5
42.75	0	0	0	0	0	5		0	0	0	0	0	5
42.83	0.05	0.111803	0.05	0.188822	-0.0888223	5		0.05	0.111803	0.05	0.188822	-0.0888223	5
42.92	0.02	0.0447214	0.02	0.0755289	-0.0355289	5		0.1	0.223607	0.1	0.377645	-0.177645	5
43	0	0	0	0	0	5		0	0	0	0	0	5
43.08	0	0	0	0	0	5		0	0	0	0	0	5
43.17	0	0	0	0	0	5		0.01	0.0223607	0.01	0.0377645	-0.0177645	5
43.25	0.02	0.0447214	0.02	0.0755289	-0.0355289	5		0.1	0.223607	0.1	0.377645	-0.177645	5
43.33	0.02	0.0447214	0.02	0.0755289	-0.0355289	5		0	0	0	0	0	5
43.42	0.02	0.0447214	0.02	0.0755289	-0.0355289	5		0	0	0	0	0	5
43.5	0	0	0	0	0	5		0	0	0	0	0	5
43.58	0	0	0	0	0	5		0	0	0	0	0	5
43.67	0.05	0.111803	0.05	0.188822	-0.0888223	5		0.22	0.438178	0.195959	0.76407	-0.32407	5
43.75	0.05	0.111803	0.05	0.188822	-0.0888223	5		0.06	0.134164	0.06	0.226587	-0.106587	5
43.83	0.01	0.0223607	0.01	0.0377645	-0.0177645	5		0.02	0.0447214	0.02	0.0755289	-0.0355289	5
43.92	0.1	0.173205	0.0774597	0.315063	-0.115063	5		0.07	0.130384	0.0583095	0.231893	-0.0918932	5
44	0	0	0	0	0	5		0.03	0.067082	0.03	0.113293	-0.0532934	5
44.08	0.022	0.0491935	0.022	0.0830818	-0.0390818	5		0.08	0.115109	0.0514782	0.222926	-0.0629263	5
44.17	0	0	0	0	0	5		0.02	0.0273861	0.0122474	0.0540044	-0.0140044	5
44.25	0	0	0	0	0	5		0	0	0	0	0	5
44.33	0.08	0.15248	0.0681909	0.269328	-0.109328	5		0	0	0	0	0	5
44.42	0	0	0	0	0	5		0	0	0	0	0	5
44.5	0.28	0.261247	0.116833	0.604381	-0.044381	5		0.15	0.282843	0.126491	0.501196	-0.201196	5
44.58	0.12	0.24135	0.107935	0.419676	-0.179676	5		0.29	0.64846	0.29	1.09517	-0.515169	5
44.67	0.2	0.34641	0.154919	0.630125	-0.230125	5		0.19	0.397492	0.177764	0.683552	-0.303552	5
44.75	0	0	0	0	0	5		0	0	0	0	0	5
44.83	0	0	0	0	0	5		0.02	0.0447214	0.02	0.0755289	-0.0355289	5
44.92	0.09	0.124499	0.0556776	0.244586	-0.0645859	5		0.02	0.0447214	0.02	0.0755289	-0.0355289	5
45	0.04	0.0894427	0.04	0.151058	-0.0710578	5		0.01	0.0223607	0.01	0.0377645	-0.0177645	5
45.08	0.11	0.245967	0.11	0.415409	-0.195409	5		0	0	0	0	0	5
45.17	0.04	0.0894427	0.04	0.151058	-0.0710578	5		0.02	0.0447214	0.02	0.0755289	-0.0355289	5
45.25	0.11	0.245967	0.11	0.415409	-0.195409	5		0.02	0.0447214	0.02	0.0755289	-0.0355289	5
45.33	0.09	0.174642	0.0781025	0.306847	-0.126847	5		0	0	0	0	0	5
45.42	0.12	0.268328	0.12	0.453173	-0.213173	5		0	0	0	0	0	5
45.5	0	0	0	0	0	5		0	0	0	0	0	5
45.58	0	0	0	0	0	5		0.01	0.0223607	0.01	0.0377645	-0.0177645	5
45.67	0.02	0.0447214	0.02	0.0755289	-0.0355289	5		0	0	0	0	0	5
45.75	0	0	0	0	0	5		0	0	0	0	0	5
45.83	0.03	0.067082	0.03	0.113293	-0.0532934	5		0	0	0	0	0	5
45.92	0	0	0	0	0	5		0.04	0.0894427	0.04	0.151058	-0.0710578	5
46	0.032	0.0715542	0.032	0.120846	-0.0568462	5		0.032	0.0486826	0.0217715	0.0924475	-0.0284475	5
46.08	0.07	0.0974679	0.043589	0.191022	-0.0510224	5		0	0	0	0	0	5
46.17	0	0	0	0	0	5		0.13	0.178885	0.08	0.352116	-0.0921156	5
46.25	0.02	0.0447214	0.02	0.0755289	-0.0355289	5		0.1	0.1	0.0447214	0.224166	-0.0241664	5
46.33	0.04	0.0894427	0.04	0.151058	-0.0710578	5		0.29	0.543599	0.243105	0.964967	-0.384967	5
46.42	0.02	0.0447214	0.02	0.0755289	-0.0355289	5		0.11	0.245967	0.11	0.415409	-0.195409	5
46.5	0	0	0	0	0	5		0	0	0	0	0	5
46.58	0.03	0.067082	0.03	0.113293	-0.0532934	5		0.01	0.0223607	0.01	0.0377645	-0.0177645	5
46.67	0.03	0.067082	0.03	0.113293	-0.0532934	5		0	0	0	0	0	5
46.75	0.08	0.178885	0.08	0.302116	-0.142116	5		0	0	0	0	0	5
46.83	0.01	0.0223607	0.01	0.0377645	-0.0177645	5		0.05	0.111803	0.05	0.188822	-0.0888223	5
46.92	0	0	0	0	0	5		0	0	0	0	0	5
47	0.05	0.0707107	0.0316228	0.137799	-0.0377989	5		0	0	0	0	0	5
47.08	0.13	0.290689	0.13	0.490938	-0.230938	5		0.03	0.067082	0.03	0.113293	-0.0532934	5
47.17	0.28	0.59854	0.267675	1.02319	-0.463185	5		0.06	0.134164	0.06	0.226587	-0.106587	5
47.25	0.06	0.134164	0.06	0.226587	-0.106587	5		0.09	0.134164	0.06	0.256587	-0.0765867	5
47.33	0.14	0.31305	0.14	0.528702	-0.248702	5		0.18	0.402492	0.18	0.67976	-0.31976	5
47.42	0	0	0	0	0	5		0	0	0	0	0	5
47.5	0.01	0.0223607	0.01	0.0377645	-0.0177645	5		0.06	0.108397	0.0484768	0.194593	-0.0745932	5
47.58	0.09	0.201246	0.09	0.33988	-0.15988	5		0.04	0.0894427	0.04	0.151058	-0.0710578	5
47.67	0.24	0.345326	0.154434	0.668779	-0.188779	5		0.04	0.0547723	0.0244949	0.108009	-0.0280087	5
47.75	0.1	0.223607	0.1	0.377645	-0.177645	5		0.02	0.0447214	0.02	0.0755289	-0.0355289	5
47.83	0.01	0.0223607	0.01	0.0377645	-0.0177645	5		0.1	0.223607	0.1	0.377645	-0.177645	5
47.92	0	0	0	0	0	5		0.01	0.0223607	0.01	0.0377645	-0.0177645	5
