# Supplementary material for: STIM1-dependent peripheral coupling governs the contractility of vascular smooth muscle cells
Source: eLife. 2022 Feb 11;11:e70278. doi: 10.7554/eLife.70278 (PMC8947769; doi:10.7554/eLife.70278)
Supplement: Figure 9—source data 1. [file elife-70278-fig9-data1.xlsx]

## Sheet: Figure 9A
			Baseline							+ Tamoxifen
Time (h)	Mean	SD	SEM	Upper limit	Lower limit	N		Mean	SD	SEM	Upper limit	Lower limit	N			Systolic BP day	Control	Stim1 smKO		Systolic BP night	Control	Stim1 smKO
0	130.662	17.0495	7.62476	151.832	109.492	5		112.38	16.6016	7.42446	132.994	91.7664	5			Mouse 1	114.223	104.562		Mouse 1	127.965	117.587
0.08	127.736	9.70991	4.34241	139.792	115.68	5		108.302	12.8967	5.76758	124.315	92.2886	5			Mouse 2	123.242	104.635		Mouse 2	135.222	118.132
0.17	130.974	15.2074	6.80096	149.856	112.092	5		111.734	9.55635	4.27373	123.6	99.8682	5			Mouse 3	104.673	101.798		Mouse 3	118.989	115.861
0.25	129.788	15.9368	7.12716	149.576	110	5		103.564	9.47211	4.23606	115.325	91.8028	5			Mouse 4	101.11	92.9415		Mouse 4	120.475	109.653
0.33	123.794	7.92941	3.54614	133.64	113.948	5		111.806	14.9992	6.70786	130.43	93.182	5			Mouse 5	115.515	87.5413		Mouse 5	130.666	103.421
0.42	126.262	17.5875	7.86539	148.1	104.424	5		108.66	12.768	5.71001	124.514	92.8065	5
0.5	118.652	14.9719	6.69562	137.242	100.062	5		110.038	17.4651	7.81063	131.724	88.3522	5		Paired t test				Paired t test
0.58	121.528	16.4372	7.35096	141.938	101.118	5		110.9	21.5514	9.6381	137.66	84.1404	5		P value	0.0384			P value	0.0272
0.67	123.744	14.7014	6.57466	141.998	105.49	5		103.78	15.5196	6.94057	123.05	84.5099	5		Significantly different (P < 0.05)?	Yes			Significantly different (P < 0.05)?	Yes
0.75	128.686	8.19484	3.66484	138.861	118.511	5		106.734	23.2219	10.3852	135.568	77.9001	5		One- or two-tailed P value?	Two-tailed			One- or two-tailed P value?	Two-tailed
0.83	121.41	19.613	8.7712	145.763	97.0573	5		100.818	15.5265	6.94368	120.097	81.5393	5
0.92	118.798	17.2437	7.71163	140.209	97.3871	5		103.674	15.1124	6.75846	122.439	84.9095	5		Mean of differences (B - A)	-13.46			Mean of differences (B - A)	-13.73
1	122.112	18.9969	8.49566	145.7	98.5243	5		108.51	15.9896	7.15077	128.364	88.6563	5		SD of differences	9.895			SD of differences	9.028
1.08	118.29	14.7189	6.5825	136.566	100.014	5		113.5	7.97558	3.56679	123.403	103.597	5		SEM of differences	4.425			SEM of differences	4.038
1.17	127.672	10.0076	4.47554	140.098	115.246	5		113.552	14.2952	6.39299	131.302	95.8022	5		95% confidence interval	-25.74 to -1.171			95% confidence interval	-24.94 to -2.523
1.25	126.848	11.3145	5.05998	140.897	112.799	5		114.456	8.95188	4.0034	125.571	103.341	5
1.33	129.162	15.5507	6.95451	148.471	109.853	5		110.258	10.6427	4.75958	123.473	97.0433	5
1.42	132.954	11.8453	5.29739	147.662	118.246	5		109.64	11.0364	4.93563	123.344	95.9365	5
1.5	131.964	9.59326	4.29024	143.876	120.052	5		109.842	6.34243	2.83642	117.717	101.967	5
1.58	125.506	20.0666	8.97405	150.422	100.59	5		117.442	1.55669	0.696171	119.375	115.509	5
1.67	133.814	20.415	9.12987	159.163	108.465	5		110.98	9.63668	4.30966	122.946	99.0145	5
1.75	131.03	13.3313	5.96193	147.583	114.477	5		112.998	11.6584	5.21378	127.474	98.5222	5
1.83	125.416	7.53815	3.37116	134.776	116.056	5		120.05	6.88309	3.07821	128.596	111.504	5
1.92	118.978	14.8175	6.62659	137.376	100.58	5		110.426	6.7635	3.02473	118.824	102.028	5
2	120.954	14.4427	6.45897	138.887	103.021	5		111.542	10.4736	4.68395	124.547	98.5373	5
2.08	125.132	16.0688	7.18618	145.084	105.18	5		112.184	5.37162	2.40226	118.854	105.514	5
2.17	122.122	12.7553	5.70432	137.96	106.284	5		116.964	7.51057	3.35883	126.29	107.638	5
2.25	121.104	10.7141	4.79151	134.407	107.801	5		113.79	4.10352	1.83515	118.885	108.695	5
2.33	121.968	6.17624	2.7621	129.637	114.299	5		111.922	8.2041	3.66899	122.109	101.735	5
2.42	127.026	16.212	7.25024	147.156	106.896	5		109.392	6.96003	3.11262	118.034	100.75	5
2.5	127.702	9.73341	4.35291	139.788	115.616	5		116.89	12.0048	5.36871	131.796	101.984	5
2.58	122.488	14.1249	6.31684	140.026	104.95	5		112.774	10.826	4.84152	126.216	99.3318	5
2.67	125.212	14.542	6.50338	143.268	107.156	5		106.584	11.9075	5.32518	121.369	91.7989	5
2.75	131.228	12.3566	5.52603	146.571	115.885	5		100.942	10.9075	4.87796	114.485	87.3986	5
2.83	130.228	10.2557	4.58647	142.962	117.494	5		108.258	3.66901	1.64083	112.814	103.702	5
2.92	123.936	14.5746	6.51796	142.033	105.839	5		112.122	7.32188	3.27444	121.213	103.031	5
3	128.148	12.5728	5.62271	143.759	112.537	5		104.802	10.1624	4.54477	117.42	92.1837	5
3.08	128.474	9.73597	4.35406	140.563	116.385	5		102.018	8.1782	3.6574	112.173	91.8634	5
3.17	128.076	16.686	7.46221	148.794	107.358	5		107.648	15.9589	7.13702	127.464	87.8325	5
3.25	132.102	10.2613	4.58897	144.843	119.361	5		110.106	12.5274	5.60244	125.661	94.5511	5
3.33	130.312	6.57449	2.9402	138.475	122.149	5		116.132	17.5948	7.86863	137.979	94.2852	5
3.42	127.526	7.69067	3.43937	137.075	117.977	5		108.446	17.7416	7.93429	130.475	86.4169	5
3.5	129.2	12.3804	5.5367	144.572	113.828	5		109.902	21.4282	9.583	136.509	83.2953	5
3.58	136.806	7.37753	3.29933	145.966	127.646	5		110.992	21.9643	9.82272	138.264	83.7198	5
3.67	138.25	14.9785	6.6986	156.848	119.652	5		105.522	20.7379	9.27426	131.271	79.7725	5
3.75	122.894	7.59254	3.39549	132.321	113.467	5		106.89	16.4538	7.35837	127.32	86.4599	5
3.83	126.83	11.3963	5.09658	140.98	112.68	5		103.876	16.0988	7.19962	123.865	83.8867	5
3.92	122.38	7.42873	3.32223	131.604	113.156	5		108.56	18.6326	8.33274	131.695	85.4246	5
4	125.788	11.2748	5.04226	139.788	111.788	5		111.7	15.5641	6.96049	131.025	92.3746	5
4.08	126.47	13.0611	5.84109	142.687	110.253	5		114.132	11.5562	5.16811	128.481	99.783	5
4.17	124.196	13.9268	6.22827	141.488	106.904	5		108.68	14.242	6.3692	126.364	90.9963	5
4.25	128.804	9.38761	4.19827	140.46	117.148	5		105.254	18.7843	8.4006	128.578	81.9302	5
4.33	130.76	9.11068	4.07442	142.072	119.448	5		112.21	15.4688	6.91785	131.417	93.003	5
4.42	133.514	6.40363	2.86379	141.465	125.563	5		115.352	10.8576	4.85565	128.833	101.871	5
4.5	134.77	7.64641	3.41958	144.264	125.276	5		114.538	4.9012	2.19188	120.624	108.452	5
4.58	138.446	7.78464	3.4814	148.112	128.78	5		117.446	3.11479	1.39298	121.314	113.578	5
4.67	131.312	9.94817	4.44896	143.664	118.96	5		120.092	8.05627	3.60287	130.095	110.089	5
4.75	129.642	15.1769	6.78733	148.487	110.797	5		119.634	8.72094	3.90012	130.462	108.806	5
4.83	130.994	14.407	6.443	148.883	113.105	5		111.37	8.24679	3.68808	121.61	101.13	5
4.92	128.892	6.60953	2.95587	137.099	120.685	5		112.868	7.09177	3.17154	121.674	104.062	5
5	129.008	10.1303	4.53039	141.586	116.43	5		112.904	10.4693	4.68202	125.903	99.9046	5
5.08	126.38	16.5254	7.39039	146.899	105.861	5		117.728	6.69369	2.99351	126.039	109.417	5
5.17	125.286	12.8539	5.74843	141.246	109.326	5		118.354	3.53138	1.57928	122.739	113.969	5
5.25	125.018	8.29582	3.71	135.319	114.717	5		113.924	5.03806	2.25309	120.18	107.668	5
5.33	121.738	12.083	5.40368	136.741	106.735	5		118.16	9.20093	4.11478	129.584	106.736	5
5.42	122.948	16.8853	7.55135	143.914	101.982	5		118.582	9.92892	4.44035	130.91	106.254	5
5.5	122.304	12.1569	5.43675	137.399	107.209	5		118.65	6.58739	2.94597	126.829	110.471	5
5.58	123.392	14.5014	6.48524	141.398	105.386	5		115.356	11.2864	5.04744	129.37	101.342	5
5.67	121.318	8.61138	3.85113	132.01	110.626	5		107.51	18.3952	8.22658	130.351	84.6694	5
5.75	125.572	10.2075	4.56495	138.246	112.898	5		108.86	20.7343	9.27267	134.605	83.1149	5
5.83	127.222	4.28078	1.91442	132.537	121.907	5		109.498	15.1876	6.79211	128.356	90.6401	5
5.92	131.428	15.8287	7.07881	151.082	111.774	5		105.134	6.71979	3.00518	113.478	96.7903	5
6	133.4	8.38213	3.7486	143.808	122.992	5		108.876	12.3066	5.50369	124.157	93.5953	5
6.08	132.202	8.46058	3.78369	142.707	121.697	5		105.25	10.9214	4.88418	118.811	91.6893	5
6.17	129.968	14.1762	6.33981	147.57	112.366	5		109.618	9.00541	4.02734	120.8	98.4363	5
6.25	131.146	9.75639	4.36319	143.26	119.032	5		103.996	15.937	7.12726	123.784	84.2076	5
6.33	137.214	9.02235	4.03492	148.417	126.011	5		103.856	19.8671	8.88485	128.524	79.1877	5
6.42	128.92	2.94001	1.31481	132.571	125.269	5		103.1	11.6378	5.20458	117.55	88.6498	5
6.5	131.638	4.85441	2.17096	137.666	125.61	5		109.644	9.74467	4.35795	121.744	97.5444	5
6.58	129.884	15.5355	6.94767	149.174	110.594	5		113.548	10.2668	4.59146	126.296	100.8	5
6.67	128.186	7.73673	3.45997	137.792	118.58	5		116.876	15.5015	6.93248	136.124	97.6284	5
6.75	131.452	12.0066	5.36949	146.36	116.544	5		115.44	6.66321	2.97988	123.713	107.167	5
6.83	129.508	9.00588	4.02755	140.69	118.326	5		113.156	12.9491	5.79102	129.234	97.0776	5
6.92	123.948	5.16792	2.31117	130.365	117.531	5		115.27	12.7846	5.71744	131.144	99.3958	5
7	120.828	16.8779	7.54803	141.785	99.8713	5		107.674	11.0502	4.94179	121.395	93.9534	5
7.08	119.752	11.0121	4.92474	133.425	106.079	5		113.204	18.7233	8.3733	136.452	89.956	5
7.17	124.154	7.53053	3.36775	133.504	114.804	5		113.092	4.55376	2.0365	118.746	107.438	5
7.25	122.574	12.0489	5.38841	137.535	107.613	5		112.294	16.9296	7.57116	133.315	91.2731	5
7.33	119.508	15.1759	6.78685	138.351	100.665	5		111.532	8.05554	3.60255	121.534	101.53	5
7.42	119.244	17.0922	7.64385	140.467	98.0213	5		116.41	8.71857	3.89906	127.236	105.584	5
7.5	119.206	13.5592	6.06386	136.042	102.37	5		110.55	6.7508	3.01905	118.932	102.168	5
7.58	120.378	11.6933	5.22942	134.897	105.859	5		110.858	4.10407	1.83539	115.954	105.762	5
7.67	118.778	12.2644	5.4848	134.006	103.55	5		112.066	10.9401	4.89257	125.65	98.4821	5
7.75	116.868	16.2171	7.2525	137.004	96.7318	5		114.646	15.3239	6.85307	133.673	95.6188	5
7.83	121.504	14.3889	6.43491	139.37	103.638	5		113.916	13.0867	5.85256	130.165	97.6667	5
7.92	119.068	12.7849	5.71759	134.943	103.193	5		118.532	8.70803	3.89435	129.344	107.72	5
8	119.556	8.02886	3.59062	129.525	109.587	5		111.538	8.92868	3.99303	122.624	100.452	5
8.08	125.742	13.4908	6.03326	142.493	108.991	5		112.228	10.9883	4.9141	125.872	98.5843	5
8.17	118.25	9.26022	4.1413	129.748	106.752	5		110.896	15.5814	6.96822	130.243	91.5491	5
8.25	112.712	12.845	5.74447	128.661	96.7628	5		113.07	20.8061	9.30479	138.904	87.2358	5
8.33	126.23	15.001	6.70865	144.856	107.604	5		107.796	20.5909	9.20852	133.363	82.229	5
8.42	122.57	12.3953	5.54333	137.961	107.179	5		104.598	22.6749	10.1405	132.753	76.4434	5
8.5	129.694	12.2571	5.48154	144.913	114.475	5		102.526	18.9827	8.48932	126.096	78.9559	5
8.58	128.58	14.1585	6.33189	146.16	111	5		104.876	15.9711	7.14249	124.707	85.0453	5
8.67	129.11	16.0633	7.18375	149.055	109.165	5		107.834	22.6646	10.1359	135.976	79.6921	5
8.75	131.534	8.76132	3.91818	142.413	120.655	5		108.736	17.2014	7.69271	130.094	87.3776	5
8.83	132.184	7.60967	3.40315	141.633	122.735	5		114.338	16.5544	7.40337	134.893	93.7829	5
8.92	122.938	10.9249	4.88574	136.503	109.373	5		114.334	13.7557	6.15173	131.414	97.2541	5
9	127.236	10.7192	4.79377	140.546	113.926	5		117.904	10.4519	4.67421	130.882	104.926	5
9.08	131.954	5.93901	2.65601	139.328	124.58	5		115.996	6.26194	2.80043	123.771	108.221	5
9.17	132.554	17.4934	7.82327	154.275	110.833	5		107.638	8.87693	3.96988	118.66	96.6158	5
9.25	134.508	12.5582	5.61619	150.101	118.915	5		111.726	9.47008	4.23515	123.485	99.9673	5
9.33	129.932	8.56902	3.83218	140.572	119.292	5		116.304	11.2594	5.03535	130.284	102.324	5
9.42	131.092	7.30458	3.26671	140.162	122.022	5		122.644	8.85574	3.96041	133.64	111.648	5
9.5	123.022	10.8664	4.8596	136.514	109.53	5		110.586	3.37814	1.51075	114.781	106.391	5
9.58	125.434	10.4577	4.67681	138.419	112.449	5		122.384	8.51738	3.80909	132.96	111.808	5
9.67	126.404	5.05844	2.2622	132.685	120.123	5		119.304	11.5436	5.16247	133.637	104.971	5
9.75	130.522	8.18534	3.6606	140.685	120.359	5		123.53	11.0636	4.94779	137.267	109.793	5
9.83	122.136	7.20898	3.22396	131.087	113.185	5		116.966	9.21559	4.12134	128.409	105.523	5
9.92	123.776	16.1621	7.22789	143.844	103.708	5		114.184	16.4169	7.34187	134.568	93.7997	5
10	119.624	11.3648	5.08248	133.735	105.513	5		116.318	14.2405	6.36856	134	98.636	5
10.08	124.932	13.6498	6.10438	141.88	107.984	5		112.128	20.5466	9.18873	137.64	86.616	5
10.17	124.47	18.3425	8.203	147.245	101.695	5		110.084	16.782	7.50515	130.922	89.2464	5
10.25	125.376	12.0594	5.39314	140.35	110.402	5		105.888	19.8635	8.88324	130.552	81.2242	5
10.33	130.03	9.82386	4.39336	142.228	117.832	5		114.044	15.4139	6.89331	133.183	94.9051	5
10.42	132.276	5.33993	2.38809	138.906	125.646	5		115.976	14.7519	6.59724	134.293	97.6591	5
10.5	130.046	9.51234	4.25405	141.857	118.235	5		114.76	11.1576	4.98982	128.614	100.906	5
10.58	135.436	10.285	4.5996	148.207	122.665	5		117.766	12.9942	5.81118	133.9	101.632	5
10.67	133.028	6.3508	2.84017	140.914	125.142	5		118.6	10.5915	4.73664	131.751	105.449	5
10.75	134.132	8.71711	3.89841	144.956	123.308	5		114.278	6.927	3.09785	122.879	105.677	5
10.83	133.514	13.1703	5.88995	149.867	117.161	5		118.048	9.32824	4.17172	129.631	106.465	5
10.92	129.52	15.5705	6.96332	148.853	110.187	5		119.992	1.93589	0.865756	122.396	117.588	5
11	127.86	11.7345	5.24783	142.43	113.29	5		120.902	5.14958	2.30296	127.296	114.508	5
11.08	125.41	17.3342	7.75207	146.933	103.887	5		126.33	10.7157	4.79223	139.635	113.025	5
11.17	123.434	18.3271	8.19613	146.19	100.678	5		115.856	11.303	5.05486	129.891	101.821	5
11.25	127.834	9.66406	4.3219	139.834	115.834	5		114.86	16.8039	7.51493	135.725	93.9952	5
11.33	127.944	6.63349	2.96658	136.181	119.707	5		116.168	17.8165	7.96779	138.29	94.0459	5
11.42	130.568	6.83389	3.05621	139.053	122.083	5		115.188	10.8118	4.83517	128.613	101.763	5
11.5	124.106	9.10987	4.07406	135.417	112.795	5		111.408	15.1434	6.77232	130.211	92.605	5
11.58	118.846	3.54636	1.58598	123.249	114.443	5		106.44	12.369	5.53158	121.798	91.0819	5
11.67	119.922	9.33844	4.17628	131.517	108.327	5		107.602	8.62244	3.85607	118.308	96.8958	5
11.75	121.956	10.6288	4.75337	135.153	108.759	5		108.99	16.9858	7.59627	130.081	87.8994	5
11.83	117.752	16.7859	7.50688	138.594	96.9096	5		112.774	10.1134	4.52286	125.331	100.217	5
11.92	120.606	16.0817	7.19195	140.574	100.638	5		115.906	22.3007	9.97318	143.596	88.216	5
12	121.868	16.3491	7.31155	142.168	101.568	5		106.554	19.9592	8.92604	131.337	81.7713	5
12.08	124.57	15.3609	6.86962	143.643	105.497	5		102.284	16.9482	7.57946	123.328	81.2401	5
12.17	126.018	16.1572	7.22571	146.08	105.956	5		96.16	16.6023	7.42475	116.774	75.5456	5
12.25	126.404	16.9415	7.57648	147.44	105.368	5		99.112	16.5061	7.38174	119.607	78.617	5
12.33	133.756	13.1681	5.88895	150.106	117.406	5		99.266	21.1309	9.45002	125.503	73.0285	5
12.42	133.406	12.3371	5.51731	148.725	118.087	5		102.386	16.5729	7.41165	122.964	81.808	5
12.5	128.196	10.8594	4.85647	141.68	114.712	5		107.184	7.44214	3.32823	116.425	97.9434	5
12.58	125.134	16.797	7.51183	145.99	104.278	5		109.998	8.13868	3.63973	120.104	99.8925	5
12.67	123.224	18.0454	8.07017	145.63	100.818	5		111.268	13.3587	5.9742	127.855	94.681	5
12.75	115.882	17.1453	7.66763	137.171	94.5932	5		108.722	6.98518	3.12387	117.395	100.049	5
12.83	123.456	18.4143	8.23513	146.32	100.592	5		111.594	11.2742	5.04197	125.593	97.5952	5
12.92	115.438	11.7226	5.24252	129.994	100.882	5		100.13	8.84682	3.95642	111.115	89.1452	5
13	112.398	6.16417	2.7567	120.052	104.744	5		97.982	8.14046	3.64053	108.09	87.8743	5
13.08	108.09	8.54016	3.81928	118.694	97.486	5		99.356	11.6009	5.1881	113.76	84.9515	5
13.17	107.924	9.0818	4.06151	119.201	96.6475	5		97.86	20.2431	9.05301	122.995	72.7248	5
13.25	114.734	11.7553	5.25712	129.33	100.138	5		93.732	7.67223	3.43113	103.258	84.2057	5
13.33	117.084	10.7334	4.80013	130.411	103.757	5		97.588	8.72457	3.90174	108.421	86.755	5
13.42	117.268	17.8771	7.99488	139.465	95.0706	5		99.72	12.5523	5.61355	115.306	84.1343	5
13.5	118.246	14.2392	6.36797	135.926	100.566	5		93.592	11.0388	4.93669	107.298	79.8855	5
13.58	117.962	18.4158	8.23581	140.828	95.0957	5		94.526	14.3495	6.41728	112.343	76.7088	5
13.67	117.46	12.1903	5.45168	132.596	102.324	5		88.778	9.00986	4.02933	99.9652	77.5908	5
13.75	114.348	11.9989	5.36607	129.247	99.4494	5		91.548	10.2821	4.5983	104.315	78.7811	5
13.83	114.93	18.6693	8.34916	138.111	91.749	5		92.456	10.8923	4.87116	105.981	78.9315	5
13.92	113.696	9.81938	4.39136	125.888	101.504	5		91.472	6.48326	2.8994	99.522	83.422	5
14	107.688	6.87772	3.07581	116.228	99.1482	5		96.144	12.0011	5.36707	111.045	81.2426	5
14.08	107.75	13.4547	6.01711	124.456	91.0438	5		97.114	20.9421	9.36558	123.117	71.111	5
14.17	105.864	13.4904	6.0331	122.615	89.1134	5		92.218	16.203	7.24619	112.337	72.0994	5
14.25	109.112	10.7039	4.78692	122.403	95.8214	5		92.152	11.799	5.27669	106.802	77.5016	5
14.33	119.694	3.97469	1.77753	124.629	114.759	5		111.514	20.3411	9.09683	136.771	86.2571	5
14.42	110.628	9.40028	4.20393	122.3	98.956	5		94.724	8.48861	3.79622	105.264	84.184	5
14.5	116.004	9.98156	4.46389	128.398	103.61	5		99.77	13.3391	5.96542	116.333	83.2073	5
14.58	113.436	10.4496	4.67319	126.411	100.461	5		114.996	13.5705	6.06891	131.846	98.146	5
14.67	113.774	11.955	5.34644	128.618	98.9299	5		113.044	19.878	8.8897	137.726	88.3622	5
14.75	111.092	7.84503	3.5084	120.833	101.351	5		110.448	23.5743	10.5428	139.719	81.1766	5
14.83	110.758	8.47468	3.78999	121.281	100.235	5		103.346	8.22873	3.68	113.563	93.1287	5
14.92	111.912	12.3092	5.50483	127.196	96.6281	5		101.894	13.3078	5.95144	118.418	85.3702	5
15	106.43	8.94301	3.99943	117.534	95.3258	5		98.682	13.5911	6.07813	115.558	81.8064	5
15.08	109.318	4.97444	2.22464	115.495	103.141	5		97.208	9.72312	4.34831	109.281	85.1352	5
15.17	113.294	14.6104	6.53398	131.435	95.1528	5		97.302	18.2463	8.15999	119.958	74.6462	5
15.25	114.544	15.7843	7.05896	134.143	94.9452	5		99.722	23.0249	10.2971	128.311	71.1328	5
15.33	111.806	15.2598	6.82437	130.754	92.8585	5		92.534	23.1393	10.3482	121.265	63.8028	5
15.42	122.536	16.8851	7.55126	143.502	101.57	5		99.586	16.0526	7.17896	119.518	79.654	5
15.5	117.694	19.8924	8.89617	142.394	92.9943	5		88.396	10.1239	4.52753	100.966	75.8256	5
15.58	116.98	12.0423	5.38549	131.933	102.027	5		92.772	9.96561	4.45676	105.146	80.3981	5
15.67	111.24	13.5534	6.06127	128.069	94.4112	5		93.098	8.41668	3.76406	103.549	82.6473	5
15.75	105.634	12.5617	5.61776	121.231	90.0366	5		100.828	8.52446	3.81225	111.413	90.2435	5
15.83	110.76	8.73759	3.90757	121.609	99.9109	5		102.184	10.113	4.52267	114.741	89.627	5
15.92	108.04	9.35694	4.18455	119.658	96.4218	5		103.144	18.9725	8.48477	126.701	79.5865	5
16	106.776	13.3579	5.97385	123.362	90.1899	5		96.628	18.4655	8.25802	119.556	73.7001	5
16.08	107.656	14.3194	6.40383	125.436	89.8761	5		94.026	16.2209	7.25419	114.167	73.8851	5
16.17	108.798	12.8814	5.76076	124.792	92.8036	5		95.384	15.1811	6.78921	114.234	76.5341	5
16.25	105.346	11.5502	5.16539	119.687	91.0046	5		93.398	6.50631	2.90971	101.477	85.3193	5
16.33	109.166	10.7007	4.78551	122.453	95.8793	5		95.024	10.3344	4.62169	107.856	82.1921	5
16.42	112.936	10.0071	4.47531	125.361	100.511	5		89.808	5.35484	2.39476	96.4569	83.1591	5
16.5	107.162	12.4729	5.57807	122.649	91.6748	5		94.924	9.08633	4.06353	106.206	83.6418	5
16.58	117.612	15.6812	7.01286	137.083	98.1412	5		91.946	12.9774	5.80366	108.06	75.8325	5
16.67	124.646	14.4921	6.48105	142.64	106.652	5		98.5	19.2167	8.59398	122.361	74.6393	5
16.75	118.62	19.6128	8.77112	142.973	94.2675	5		95.588	17.9724	8.03752	117.904	73.2723	5
16.83	113.738	16.2007	7.24518	133.854	93.6222	5		100.9	16.0402	7.17341	120.817	80.9834	5
16.92	113.878	14.5058	6.4872	131.889	95.8666	5		99.498	20.8632	9.33031	125.403	73.5929	5
17	110.314	19.8207	8.86409	134.925	85.7033	5		99.864	14.6158	6.53638	118.012	81.7161	5
17.08	111.188	4.93836	2.2085	117.32	105.056	5		100.094	12.5625	5.61814	115.692	84.4955	5
17.17	111.792	6.82607	3.05271	120.268	103.316	5		101.992	14.0773	6.29557	119.471	84.5127	5
17.25	114.104	5.2401	2.34344	120.61	107.598	5		94.692	11.6161	5.19488	109.115	80.2687	5
17.33	109.204	8.59675	3.84458	119.878	98.5297	5		96.078	17.2195	7.70081	117.459	74.6971	5
17.42	107.468	7.35147	3.28768	116.596	98.3399	5		93.89	7.58933	3.39405	103.313	84.4666	5
17.5	117.612	21.5886	9.65473	144.418	90.8062	5		92.244	8.88476	3.97338	103.276	81.2121	5
17.58	111.646	15.9399	7.12855	131.438	91.854	5		95.224	18.2614	8.16677	117.899	72.5494	5
17.67	112.174	16.9429	7.57712	133.211	91.1366	5		98.402	8.04757	3.59898	108.394	88.4096	5
17.75	110.818	7.09354	3.17233	119.626	102.01	5		93.876	7.3649	3.29368	103.021	84.7313	5
17.83	110.99	13.5208	6.0467	127.778	94.2017	5		101.424	12.6713	5.66678	117.158	85.6905	5
17.92	112.93	11.7981	5.27628	127.579	98.2807	5		101.01	16.8198	7.52205	121.895	80.1254	5
18	116.092	21.8067	9.75226	143.169	89.0154	5		86.286	9.31932	4.16773	97.8575	74.7145	5
18.08	118.458	21.6073	9.66307	145.287	91.629	5		82.438	11.7791	5.26776	97.0636	67.8124	5
18.17	109.824	13.3419	5.9667	126.39	93.2578	5		86.312	11.9721	5.35411	101.177	71.4466	5
18.25	103.15	11.759	5.25877	117.751	88.5493	5		81.398	4.65531	2.08192	87.1783	75.6177	5
18.33	106.712	10.43	4.66443	119.663	93.7615	5		82.552	7.69409	3.4409	92.1055	72.9985	5
18.42	105.336	7.41285	3.31513	114.54	96.1317	5		92.992	8.24475	3.68716	103.229	82.7548	5
18.5	104.716	8.74205	3.90956	115.571	93.8613	5		97.936	21.7467	9.72541	124.938	70.9339	5
18.58	110.672	15.0148	6.71484	129.315	92.0286	5		100	18.2375	8.15605	122.645	77.3552	5
18.67	113.706	10.2401	4.57949	126.421	100.991	5		100.692	14.1425	6.3247	118.252	83.1318	5
18.75	108.888	9.68285	4.3303	120.911	96.8652	5		95.15	16.8787	7.54839	116.108	74.1923	5
18.83	116.512	21.2831	9.51809	142.938	90.0855	5		104.21	25.3164	11.3218	135.644	72.7756	5
18.92	108.806	5.73782	2.56603	115.93	101.682	5		99.8	22.752	10.175	128.05	71.5496	5
19	108.426	3.46223	1.54836	112.725	104.127	5		103.92	24.9686	11.1663	134.923	72.9173	5
19.08	109.748	10.067	4.50211	122.248	97.2481	5		95.316	16.8856	7.55147	116.282	74.3498	5
19.17	111.684	9.48368	4.24123	123.46	99.9085	5		90.976	11.1054	4.96648	104.765	77.1868	5
19.25	112.186	12.1459	5.4318	127.267	97.1049	5		88.96	14.1486	6.32745	106.528	71.3922	5
19.33	114.082	8.50767	3.80475	124.646	103.518	5		89.712	11.5275	5.15526	104.025	75.3987	5
19.42	108.408	6.59329	2.94861	116.595	100.221	5		92.036	6.91356	3.09184	100.62	83.4517	5
19.5	113.672	11.1396	4.98177	127.504	99.8404	5		88.428	10.1997	4.56143	101.093	75.7634	5
19.58	110.066	15.9111	7.11568	129.822	90.3097	5		90.678	9.8598	4.40944	102.921	78.4354	5
19.67	113.006	18.8241	8.41839	136.379	89.6328	5		97.112	16.7764	7.50261	117.943	76.2814	5
19.75	114.764	21.2365	9.49724	141.133	88.3954	5		100.988	17.7765	7.94991	123.06	78.9155	5
19.83	120.422	22.2186	9.93645	148.01	92.834	5		104.412	19.4602	8.70285	128.575	80.249	5
19.92	109.462	15.6207	6.9858	128.858	90.0663	5		103.866	26.6662	11.9255	136.976	70.7556	5
20	104.71	11.378	5.08841	118.838	90.5823	5		100.492	23.3121	10.4255	129.438	71.5462	5
20.08	106.074	14.2187	6.35879	123.729	88.4192	5		98.942	14.1974	6.34925	116.57	81.3136	5
20.17	107.406	15.0462	6.72887	126.088	88.7237	5		99.246	14.2082	6.3541	116.888	81.6042	5
20.25	109.926	7.97202	3.5652	119.825	100.027	5		94.776	6.71099	3.00125	103.109	86.4432	5
20.33	111.616	18.8035	8.40916	134.964	88.2684	5		100.446	14.4915	6.48079	118.44	82.4524	5
20.42	106.958	15.8166	7.07339	126.597	87.3191	5		94.33	17.8675	7.99057	116.515	72.1446	5
20.5	108.16	14.1195	6.31444	125.692	90.6283	5		99.358	17.528	7.83877	121.122	77.5941	5
20.58	110.806	11.7141	5.2387	125.351	96.2611	5		96.806	16.6842	7.46138	117.522	76.0899	5
20.67	105.96	10.5961	4.73873	119.117	92.8032	5		99.24	20.8073	9.3053	125.076	73.4043	5
20.75	112.3	12.1301	5.42474	127.361	97.2385	5		103.506	20.5579	9.19378	129.032	77.98	5
20.83	123.764	13.909	6.22031	141.034	106.494	5		101.408	20.8219	9.31184	127.262	75.5542	5
20.92	115.006	17.6377	7.88783	136.906	93.1059	5		95.53	8.01148	3.58284	105.478	85.5824	5
21	112.146	14.8765	6.65296	130.618	93.6744	5		94.3	8.17336	3.65524	104.449	84.1514	5
21.08	109.452	15.7223	7.03121	128.974	89.9302	5		100.478	2.97757	1.33161	104.175	96.7809	5
21.17	113.288	19.2231	8.59682	137.157	89.4194	5		95.656	6.17366	2.76094	103.322	87.9904	5
21.25	103.658	12.0623	5.39444	118.635	88.6806	5		94.464	10.1447	4.53685	107.06	81.8677	5
21.33	102.344	12.1556	5.43613	117.437	87.2509	5		89.514	10.6304	4.75406	102.713	76.3146	5
21.42	102.526	9.89224	4.42394	114.809	90.2432	5		90.526	10.1493	4.5389	103.128	77.924	5
21.5	102.928	9.91316	4.4333	115.237	90.6192	5		93.332	14.1939	6.3477	110.956	75.708	5
21.58	104.966	15.131	6.76678	123.754	86.1784	5		94.69	16.0666	7.18521	114.639	74.7406	5
21.67	111.766	14.7782	6.60902	130.116	93.4164	5		100.23	22.8849	10.2344	128.645	71.8146	5
21.75	115.486	7.74391	3.46318	125.101	105.871	5		99.23	20.197	9.03237	124.308	74.1521	5
21.83	113.92	18.7681	8.39335	137.224	90.6163	5		99.548	22.9898	10.2814	128.094	71.0024	5
21.92	109.438	15.6135	6.98258	128.825	90.0513	5		95.25	14.3148	6.40176	113.024	77.4759	5
22	107.36	11.3473	5.07465	121.449	93.2705	5		97.396	8.80744	3.93881	108.332	86.4601	5
22.08	112.344	13.1667	5.88832	128.693	95.9954	5		92.852	7.75529	3.46827	102.481	83.2225	5
22.17	112.224	8.1338	3.63755	122.323	102.125	5		102.804	16.1418	7.21881	122.847	82.7614	5
22.25	117.598	15.7995	7.06573	137.216	97.9804	5		94.89	11.4047	5.10034	109.051	80.7292	5
22.33	123.552	9.64872	4.31504	135.532	111.572	5		98.916	13.468	6.02309	115.639	82.1932	5
22.42	116.28	19.029	8.51004	139.908	92.6523	5		93.612	10.1006	4.51715	106.154	81.0704	5
22.5	114.794	15.7003	7.02139	134.288	95.2995	5		95.732	7.7155	3.45048	105.312	86.1519	5
22.58	116.614	11.9273	5.33404	131.424	101.804	5		100.722	17.0121	7.60804	121.845	79.5987	5
22.67	113.452	15.4869	6.92594	132.681	94.2225	5		98.97	18.953	8.47605	122.503	75.4367	5
22.75	116.814	20.5463	9.18858	142.326	91.3024	5		98.618	18.4721	8.26096	121.554	75.6819	5
22.83	119.896	14.6633	6.55763	138.103	101.689	5		95.822	10.1895	4.55689	108.474	83.1701	5
22.92	112.358	15.2029	6.79893	131.235	93.4812	5		97.58	15.0777	6.74294	116.301	78.8586	5
23	118.948	9.16699	4.0996	130.33	107.566	5		100.2	19.8646	8.88371	124.865	75.5349	5
23.08	114.474	12.0255	5.37796	129.406	99.5424	5		107.698	26.6195	11.9046	140.75	74.6455	5
23.17	117.222	7.02485	3.14161	125.944	108.5	5		103.634	23.7823	10.6358	133.164	74.1044	5
23.25	114.654	15.3369	6.85888	133.697	95.6107	5		109.352	19.5852	8.75879	133.67	85.0337	5
23.33	111.1	16.3806	7.32562	131.439	90.7608	5		110.05	24.8233	11.1013	140.872	79.2278	5
23.42	111.214	16.0977	7.19913	131.202	91.226	5		107.886	27.5102	12.3029	142.044	73.7276	5
23.5	110.792	15.4647	6.91604	129.994	91.59	5		107.128	20.3657	9.1078	132.415	81.8407	5
23.58	115.662	23.0371	10.3025	144.266	87.0577	5		107.988	18.0133	8.05577	130.354	85.6216	5
23.67	126.576	13.9858	6.25463	143.942	109.21	5		98.658	12.4412	5.56387	114.106	83.2102	5
23.75	120.918	10.6933	4.78218	134.195	107.641	5		101.452	14.8647	6.64772	119.909	82.995	5
23.83	123.49	22.5297	10.0756	151.464	95.5157	5		111.016	24.7813	11.0825	141.786	80.246	5
23.92	126.77	12.6239	5.64556	142.445	111.095	5		114.646	26.9647	12.059	148.127	81.1649	5
24	128.418	20.5806	9.20393	153.972	102.864	5		114.442	15.6688	7.0073	133.897	94.9866	5
24.08	125.706	17.2624	7.71997	147.14	104.272	5		113.682	17.223	7.70234	135.067	92.2969	5
24.17	121.086	18.6881	8.35758	144.29	97.8816	5		103.214	16.9688	7.58866	124.284	82.1445	5
24.25	120.574	19.5543	8.74496	144.854	96.2941	5		108.034	20.9489	9.36863	134.045	82.0225	5
24.33	119.394	14.9248	6.67459	137.926	100.862	5		106.84	19.4357	8.69189	130.973	82.7074	5
24.42	120.392	16.3569	7.31502	140.702	100.082	5		112.722	20.6234	9.22305	138.329	87.1147	5
24.5	130.804	12.5756	5.62398	146.419	115.189	5		104.27	13.8214	6.18112	121.432	87.1085	5
24.58	122.778	15.1234	6.76338	141.556	104	5		105.98	15.7948	7.06365	125.592	86.3682	5
24.67	120.444	9.13118	4.08359	131.782	109.106	5		112.64	17.3992	7.78117	134.244	91.036	5
24.75	118.082	6.71485	3.00297	126.42	109.744	5		114.832	23.3876	10.4592	143.871	85.7925	5
24.83	114.708	9.41253	4.20941	126.395	103.021	5		119.518	9.26556	4.14368	131.023	108.013	5
24.92	119.776	9.21536	4.12124	131.218	108.334	5		114.694	11.5163	5.15023	128.993	100.395	5
25	112.202	10.5786	4.73091	125.337	99.0669	5		111.72	17.3093	7.74093	133.212	90.2277	5
25.08	126.506	16.5028	7.3803	146.997	106.015	5		108.064	17.0287	7.61547	129.208	86.9201	5
25.17	126.594	15.5178	6.93977	145.862	107.326	5		115.048	14.3175	6.40298	132.826	97.2705	5
25.25	128.328	11.0859	4.95775	142.093	114.563	5		118.784	11.7797	5.26802	133.41	104.158	5
25.33	131.068	16.3451	7.30975	151.363	110.773	5		117.74	12.0389	5.38396	132.688	102.792	5
25.42	123.212	15.0131	6.71407	141.853	104.571	5		111.29	6.96463	3.11468	119.938	102.642	5
25.5	127.582	9.42427	4.21466	139.284	115.88	5		114.82	10.2799	4.5973	127.584	102.056	5
25.58	135.89	11.204	5.0106	149.802	121.978	5		110.718	8.46479	3.78557	121.228	100.208	5
25.67	136.776	7.57959	3.3897	146.187	127.365	5		115.708	12.328	5.51323	131.015	100.401	5
25.75	129.088	6.18804	2.76738	136.771	121.405	5		114.206	6.54521	2.92711	122.333	106.079	5
25.83	129.126	5.62478	2.51548	136.11	122.142	5		121.446	11.3635	5.08192	135.556	107.336	5
25.92	128.428	6.25267	2.79628	136.192	120.664	5		115.19	15.4225	6.89715	134.34	96.0404	5
26	127.894	5.60595	2.50706	134.855	120.933	5		112.122	17.8488	7.9822	134.284	89.9598	5
26.08	127.786	8.10116	3.62295	137.845	117.727	5		114.45	12.3987	5.54487	129.845	99.055	5
26.17	131.208	12.4134	5.55146	146.621	115.795	5		109.966	11.217	5.0164	123.894	96.0382	5
26.25	129.74	14.2119	6.35576	147.386	112.094	5		108.806	18.2371	8.1559	131.45	86.1616	5
26.33	127.514	13.6265	6.09397	144.434	110.594	5		109.866	9.99233	4.46871	122.273	97.4589	5
26.42	124.17	11.1673	4.99417	138.036	110.304	5		117.28	10.1911	4.55758	129.934	104.626	5
26.5	129.914	14.3054	6.39757	147.676	112.152	5		114.784	11.3949	5.09593	128.933	100.635	5
26.58	122.436	18.757	8.38838	145.726	99.1461	5		117.984	12.8184	5.73254	133.9	102.068	5
26.67	124.902	12.4246	5.55647	140.329	109.475	5		109.622	8.3682	3.74237	120.012	99.2315	5
26.75	129.654	12.6264	5.64668	145.332	113.976	5		108.934	7.92744	3.54526	118.777	99.0908	5
26.83	131.18	8.34603	3.73246	141.543	120.817	5		110.982	12.5951	5.63271	126.621	95.3431	5
26.92	129.164	12.0852	5.40469	144.17	114.158	5		108.48	15.9209	7.12004	128.248	88.7116	5
27	130.646	10.8063	4.83271	144.064	117.228	5		106.288	15.577	6.96626	125.629	86.9466	5
27.08	135.152	14.4151	6.44662	153.051	117.253	5		109.216	22.1879	9.92274	136.766	81.6661	5
27.17	127.974	7.76374	3.47205	137.614	118.334	5		108.37	9.23352	4.12935	119.835	96.9051	5
27.25	130.94	13.7017	6.12758	147.953	113.927	5		116.49	18.2371	8.1559	139.134	93.8456	5
27.33	126.122	15.837	7.08253	145.786	106.458	5		122.872	14.2148	6.35705	140.522	105.222	5
27.42	128.378	20.2218	9.04347	153.487	103.269	5		111.002	14.0696	6.29212	128.472	93.5323	5
27.5	122.504	16.1974	7.24371	142.616	102.392	5		113.498	7.51665	3.36155	122.831	104.165	5
27.58	121.228	16.4554	7.35907	141.66	100.796	5		112.716	12.966	5.79859	128.815	96.6165	5
27.67	121.734	16.981	7.59414	142.819	100.649	5		116.75	11.3639	5.08208	130.86	102.64	5
27.75	126.82	15.6387	6.99382	146.238	107.402	5		121.156	11.9452	5.34203	135.988	106.324	5
27.83	128.552	9.82401	4.39343	140.75	116.354	5		114.35	5.88664	2.63258	121.659	107.041	5
27.92	126.4	8.39468	3.75421	136.823	115.977	5		110.54	8.63619	3.86222	121.263	99.8168	5
28	130.584	8.86441	3.96429	141.591	119.577	5		115.832	6.69752	2.99522	124.148	107.516	5
28.08	130.662	8.57695	3.83573	141.312	120.012	5		117.282	5.81919	2.60242	124.507	110.057	5
28.17	120.412	14.3379	6.41209	138.215	102.609	5		115.256	18.6024	8.31923	138.354	92.1581	5
28.25	123.218	6.21735	2.78048	130.938	115.498	5		110.216	14.0736	6.2939	127.691	92.7413	5
28.33	125.35	10.8195	4.83864	138.784	111.916	5		110.524	14.2492	6.37245	128.217	92.8312	5
28.42	120.106	11.6754	5.22138	134.603	105.609	5		114.972	13.3795	5.9835	131.585	98.3591	5
28.5	120.268	11.307	5.05665	134.308	106.228	5		116.782	11.2873	5.04784	130.797	102.767	5
28.58	122.864	9.09234	4.06622	134.154	111.574	5		115.57	10.721	4.79458	128.882	102.258	5
28.67	128.922	7.9117	3.53822	138.746	119.098	5		113.108	11.7641	5.26106	127.715	98.501	5
28.75	128.254	15.7014	7.02188	147.75	108.758	5		118.064	6.83473	3.05658	126.55	109.578	5
28.83	133.656	11.2227	5.01896	147.591	119.721	5		124.018	14.0241	6.27178	141.431	106.605	5
28.92	132.2	8.45414	3.78081	142.697	121.703	5		119.944	9.02227	4.03488	131.147	108.741	5
29	126.198	11.1923	5.00536	140.095	112.301	5		120.834	9.55022	4.27099	132.692	108.976	5
29.08	131.368	9.95896	4.45378	143.734	119.002	5		112.86	3.41938	1.52919	117.106	108.614	5
29.17	122.47	16.84	7.5311	143.38	101.56	5		113.928	8.05254	3.6012	123.927	103.929	5
29.25	128	15.5645	6.96064	147.326	108.674	5		117.178	11.2497	5.03103	131.146	103.21	5
29.33	127.532	15.736	7.03733	147.071	107.993	5		119.608	8.67462	3.87941	130.379	108.837	5
29.42	133.028	14.3737	6.42809	150.875	115.181	5		115.73	3.61522	1.61678	120.219	111.241	5
29.5	129.378	19.0931	8.53871	153.085	105.671	5		110.716	8.33459	3.72734	121.065	100.367	5
29.58	125.078	13.2051	5.90552	141.474	108.682	5		107.596	9.28331	4.15162	119.123	96.0692	5
29.67	125.444	17.3879	7.77609	147.034	103.854	5		114.23	9.5428	4.26767	126.079	102.381	5
29.75	119.532	8.9442	3.99997	130.638	108.426	5		114.308	5.54581	2.48016	121.194	107.422	5
29.83	124.488	15.8668	7.09584	144.189	104.787	5		117.952	11.3275	5.06583	132.017	103.887	5
29.92	126.592	11.7423	5.2513	141.172	112.012	5		121.08	15.1657	6.7823	139.911	102.249	5
30	130.296	8.65018	3.86848	141.037	119.555	5		111.442	11.5744	5.17622	125.814	97.0705	5
30.08	131.144	9.17139	4.10157	142.532	119.756	5		114.32	11.577	5.1774	128.695	99.9452	5
30.17	126.854	12.1447	5.43126	141.934	111.774	5		116.484	6.10057	2.72826	124.059	108.909	5
30.25	126.058	14.3103	6.39975	143.827	108.289	5		113.77	9.44058	4.22196	125.492	102.048	5
30.33	126.156	18.6734	8.35101	149.342	102.97	5		118.232	4.26793	1.90868	123.531	112.933	5
30.42	123.362	16.0959	7.1983	143.348	103.376	5		116.08	6.62134	2.96116	124.301	107.859	5
30.5	131.336	16.2551	7.2695	151.519	111.153	5		115.48	4.48429	2.00544	121.048	109.912	5
30.58	130.876	11.2743	5.04203	144.875	116.877	5		110.968	10.4197	4.65985	123.906	98.0302	5
30.67	135.066	5.50762	2.46308	141.905	128.227	5		111.226	13.0429	5.83297	127.421	95.0311	5
30.75	131.286	8.487	3.7955	141.824	120.748	5		109.204	11.65	5.21003	123.669	94.7387	5
30.83	126.476	10.6743	4.7737	139.73	113.222	5		117.484	10.6195	4.74917	130.67	104.298	5
30.92	131.33	9.4483	4.22541	143.062	119.598	5		113.332	15.0941	6.75028	132.074	94.5902	5
31	131.606	10.8073	4.83318	145.025	118.187	5		107.206	15.3657	6.87175	126.285	88.127	5
31.08	129.606	9.01244	4.03048	140.796	118.416	5		110.14	4.92135	2.20089	116.251	104.029	5
31.17	125.992	8.20473	3.66927	136.18	115.804	5		111.946	11.6235	5.19818	126.378	97.5135	5
31.25	123.766	4.15742	1.85926	128.928	118.604	5		106.222	15.0933	6.74994	124.963	87.4812	5
31.33	122.56	13.2369	5.91974	138.996	106.124	5		104.206	5.01211	2.24148	110.429	97.9826	5
31.42	117.574	8.48955	3.79664	128.115	107.033	5		115.392	8.54806	3.82281	126.006	104.778	5
31.5	114.652	11.0828	4.95636	128.413	100.891	5		113.368	11.5644	5.17178	127.727	99.0088	5
31.58	121.48	12.4483	5.56704	136.937	106.023	5		109.432	5.29955	2.37003	116.012	102.852	5
31.67	112.69	12.2183	5.46417	127.861	97.519	5		106.25	10.8667	4.85972	119.743	92.7572	5
31.75	123.98	13.5663	6.06705	140.825	107.135	5		109.972	8.76493	3.9198	120.855	99.0889	5
31.83	120.108	13.4622	6.02048	136.824	103.392	5		107.768	7.35115	3.28753	116.896	98.6403	5
31.92	125.102	13.8844	6.20931	142.342	107.862	5		108.544	8.29621	3.71018	118.845	98.2429	5
32	120.914	14.5029	6.48589	138.922	102.906	5		113.816	12.5028	5.59141	129.34	98.2917	5
32.08	121.892	16.0125	7.16101	141.774	102.01	5		114.178	10.5462	4.7164	127.273	101.083	5
32.17	132.506	4.82914	2.15966	138.502	126.51	5		115.546	18.3778	8.21882	138.365	92.7269	5
32.25	138.874	9.44994	4.22614	150.608	127.14	5		117.876	10.6498	4.76272	131.099	104.653	5
32.33	132.016	19.3372	8.64788	156.026	108.006	5		119.108	7.92407	3.54375	128.947	109.269	5
32.42	130.576	9.47499	4.23734	142.341	118.811	5		113.602	7.8555	3.51309	123.356	103.848	5
32.5	128.768	15.0475	6.72943	147.452	110.084	5		121.38	1.82805	0.817527	123.65	119.11	5
32.58	132.148	13.8782	6.20652	149.38	114.916	5		124.028	9.48486	4.24176	135.805	112.251	5
32.67	132.51	5.53873	2.47699	139.387	125.633	5		118.72	8.9024	3.98128	129.774	107.666	5
32.75	126.654	13.8425	6.19053	143.842	109.466	5		116.318	12.4173	5.55319	131.736	100.9	5
32.83	129.584	16.4233	7.34471	149.976	109.192	5		113.646	12.6508	5.65763	129.354	97.9379	5
32.92	133.43	9.29933	4.15879	144.977	121.883	5		116.954	10.7493	4.80724	130.301	103.607	5
33	129.368	11.4313	5.11223	143.562	115.174	5		119.458	12.4366	5.56183	134.9	104.016	5
33.08	127.514	10.839	4.84734	140.972	114.056	5		108.5	13.9646	6.24515	125.839	91.1607	5
33.17	129.09	6.17864	2.76317	136.762	121.418	5		116.734	2.72706	1.21958	120.12	113.348	5
33.25	131.972	6.88756	3.08021	140.524	123.42	5		119.95	6.4379	2.87912	127.944	111.956	5
33.33	128.35	11.4061	5.10097	142.513	114.187	5		113.602	10.0189	4.48058	126.042	101.162	5
33.42	128.768	15.635	6.9922	148.181	109.355	5		123.16	13.2509	5.92596	139.613	106.707	5
33.5	121.722	18.1442	8.11435	144.251	99.1929	5		113.912	9.62462	4.30426	125.863	101.961	5
33.58	116.824	11.7179	5.2404	131.374	102.274	5		107.076	10.9132	4.88052	120.626	93.5255	5
33.67	116.582	17.5961	7.8692	138.43	94.7336	5		112.156	11.352	5.07677	126.251	98.0606	5
33.75	124.92	6.36994	2.84872	132.829	117.011	5		114.18	8.84064	3.95366	125.157	103.203	5
33.83	114.476	10.5102	4.70031	127.526	101.426	5		119.206	8.12721	3.6346	129.297	109.115	5
33.92	122.226	10.3068	4.60932	135.024	109.428	5		116.554	14.9189	6.67195	135.078	98.0297	5
34	124.772	16.0417	7.17405	144.69	104.854	5		117.256	12.8795	5.75987	133.248	101.264	5
34.08	125.464	16.2493	7.2669	145.64	105.288	5		124.794	15.8385	7.08321	144.46	105.128	5
34.17	126.812	18.0349	8.06547	149.205	104.419	5		121.974	14.665	6.5584	140.183	103.765	5
34.25	133.124	11.3068	5.05655	147.163	119.085	5		120.876	9.4696	4.23493	132.634	109.118	5
34.33	129.182	14.89	6.65903	147.67	110.694	5		114.546	15.919	7.11921	134.312	94.7799	5
34.42	136.626	10.3233	4.61674	149.444	123.808	5		115.8	15.4517	6.91023	134.986	96.6141	5
34.5	134.568	14.9036	6.66509	153.073	116.063	5		115.658	6.89818	3.08496	124.223	107.093	5
34.58	138.69	10.1282	4.52947	151.266	126.114	5		119.582	4.96435	2.22012	125.746	113.418	5
34.67	137.176	9.81118	4.38769	149.358	124.994	5		118.836	4.90445	2.19334	124.926	112.746	5
34.75	136.496	9.31524	4.1659	148.062	124.93	5		117.458	15.4405	6.90519	136.63	98.2861	5
34.83	136.448	9.73028	4.35151	148.53	124.366	5		117.95	7.79962	3.4881	127.635	108.265	5
34.92	132.698	6.823	3.05134	141.17	124.226	5		112.408	7.81361	3.49435	122.11	102.706	5
35	132.194	10.0079	4.47568	144.62	119.768	5		115.96	10.2837	4.59901	128.729	103.191	5
35.08	133.398	8.97335	4.01301	144.54	122.256	5		115.112	12.4414	5.56398	130.56	99.6639	5
35.17	132.484	5.82358	2.60439	139.715	125.253	5		115.082	13.6921	6.12332	132.083	98.081	5
35.25	124.114	12.9655	5.79835	140.213	108.015	5		115.784	10.9237	4.88522	129.348	102.22	5
35.33	127.932	13.5578	6.06324	144.766	111.098	5		113.19	10.34	4.6242	126.029	100.351	5
35.42	125.44	18.3107	8.18878	148.176	102.704	5		106.068	14.9387	6.68078	124.617	87.5192	5
35.5	119.036	18.1213	8.1041	141.537	96.5354	5		108.264	14.6379	6.54628	126.439	90.0886	5
35.58	126.192	17.9917	8.04615	148.532	103.852	5		105.144	11.7409	5.25071	119.722	90.5657	5
35.67	120.324	11.9289	5.33475	135.136	105.512	5		108.192	11.2202	5.01783	122.124	94.2603	5
35.75	114.212	11.2901	5.04909	128.231	100.193	5		104.162	11.254	5.03295	118.136	90.1883	5
35.83	114.276	13.0458	5.83425	130.474	98.0775	5		102.86	15.6171	6.98419	122.251	83.4688	5
35.92	125.06	9.79423	4.38011	137.221	112.899	5		103.306	11.9488	5.34366	118.142	88.4696	5
36	117.516	10.7044	4.78717	130.807	104.225	5		95.146	5.02802	2.2486	101.389	88.9029	5
36.08	121.408	16.1587	7.22641	141.472	101.344	5		100.25	7.0006	3.13077	108.942	91.5576	5
36.17	118.04	14.8628	6.64685	136.495	99.5854	5		96.588	12.2286	5.46878	111.772	81.4042	5
36.25	116.892	13.6521	6.10542	133.843	99.9406	5		96.808	10.2797	4.5972	109.572	84.0441	5
36.33	115.184	11.332	5.06783	129.255	101.113	5		94.974	5.27632	2.35964	101.525	88.4226	5
36.42	111.522	7.96738	3.56312	121.415	101.629	5		102.568	14.0729	6.29359	120.042	85.0942	5
36.5	112.046	13.2552	5.92792	128.505	95.5875	5		106.914	11.0963	4.96241	120.692	93.1362	5
36.58	116.97	18.0719	8.08201	139.409	94.5308	5		107.192	15.0079	6.71173	125.827	88.5572	5
36.67	117.384	13.7614	6.15429	134.471	100.297	5		111.056	13.7031	6.12822	128.071	94.0413	5
36.75	111.556	15.6655	7.00584	131.007	92.1047	5		102.42	16.6151	7.4305	123.05	81.7896	5
36.83	109.732	14.1248	6.31679	127.27	92.1938	5		101.732	8.04701	3.59873	111.724	91.7403	5
36.92	121.442	14.8848	6.65669	139.924	102.96	5		106.598	12.5711	5.62195	122.207	90.989	5
37	117.272	15.0477	6.72953	135.956	98.5878	5		107.782	15.2533	6.82149	126.721	88.8425	5
37.08	113.632	13.9246	6.22728	130.922	96.3423	5		113.396	29.1247	13.025	149.559	77.2329	5
37.17	111.122	12.692	5.67605	126.881	95.3628	5		102.8	15.1811	6.78921	121.65	83.9501	5
37.25	111.692	14.2449	6.37049	129.379	94.0047	5		96.29	8.50736	3.80461	106.853	85.7267	5
37.33	110.132	7.13253	3.18976	118.988	101.276	5		98.928	13.2802	5.93907	115.417	82.4385	5
37.42	103.934	8.18215	3.65917	114.093	93.7745	5		100.89	12.5238	5.60081	116.44	85.3396	5
37.5	110.456	13.6091	6.08616	127.354	93.5581	5		93.944	6.04951	2.70542	101.455	86.4325	5
37.58	111.57	11.6189	5.19614	125.997	97.1432	5		91.352	11.3003	5.05367	105.383	77.3208	5
37.67	106.888	7.85991	3.51506	116.647	97.1286	5		95.14	9.69222	4.33449	107.174	83.1055	5
37.75	106.658	8.88649	3.97416	117.692	95.624	5		101.9	10.4584	4.67716	114.886	88.9141	5
37.83	109.83	11.6823	5.2245	124.336	95.3245	5		99.85	11.2381	5.02583	113.804	85.8961	5
37.92	107.784	10.5911	4.73649	120.935	94.6334	5		101.952	13.921	6.22566	119.237	84.6668	5
38	111.458	15.9298	7.12403	131.237	91.6785	5		96.192	12.1206	5.4205	111.242	81.1423	5
38.08	115.15	9.30238	4.16015	126.7	103.6	5		98.662	15.8786	7.10111	118.378	78.9462	5
38.17	110.786	8.09735	3.62125	120.84	100.732	5		101.048	14.9101	6.66799	119.561	82.5347	5
38.25	110.14	10.4634	4.67937	123.132	97.148	5		96.71	8.41767	3.7645	107.162	86.2581	5
38.33	108.364	7.84703	3.5093	118.107	98.6206	5		99.894	14.3408	6.41341	117.7	82.0875	5
38.42	106.442	10.7821	4.8219	119.83	93.0543	5		100.914	13.1925	5.89986	117.295	84.5334	5
38.5	109.812	10.4323	4.66545	122.765	96.8586	5		94.398	9.57955	4.28411	106.293	82.5034	5
38.58	105.084	11.851	5.29994	119.799	90.369	5		94.486	12.5178	5.59811	110.029	78.9432	5
38.67	107.938	16.4356	7.35024	128.346	87.5305	5		97.516	10.2969	4.6049	110.301	84.7307	5
38.75	110.522	19.0658	8.52648	134.195	86.8487	5		95.03	9.51242	4.25408	106.841	83.2188	5
38.83	108.046	18.5083	8.27718	131.027	85.0649	5		98.036	6.29042	2.81316	105.847	90.2254	5
38.92	111.538	17.5815	7.86267	133.368	89.7077	5		95.484	9.57545	4.28227	107.373	83.5945	5
39	108.696	11.963	5.35002	123.55	93.842	5		91.48	6.25566	2.79762	99.2474	83.7126	5
39.08	106.31	9.82816	4.39528	118.513	94.1067	5		90.618	6.13694	2.74452	98.238	82.998	5
39.17	104.648	13.4292	6.0057	121.323	87.9735	5		97.168	8.11996	3.63136	107.25	87.0857	5
39.25	111.298	5.91704	2.64618	118.645	103.951	5		95.074	7.04142	3.14902	103.817	86.3309	5
39.33	103.728	14.8139	6.62499	122.122	85.3341	5		101.71	17.3895	7.77681	123.302	80.1181	5
39.42	104.82	7.08783	3.16977	113.621	96.0193	5		107.918	13.8467	6.19242	125.111	90.7251	5
39.5	106.726	10.4199	4.65994	119.664	93.7879	5		102.8	18.7837	8.4003	126.123	79.477	5
39.58	104.604	10.5465	4.71653	117.699	91.5088	5		104.296	18.4568	8.25413	127.213	81.3789	5
39.67	105.064	10.6922	4.78169	118.34	91.7879	5		105.004	27.6085	12.3469	139.284	70.7236	5
39.75	109.988	10.6812	4.77679	123.25	96.7255	5		101.414	11.4726	5.13072	115.659	87.1688	5
39.83	107.622	8.61811	3.85413	118.323	96.9212	5		96.506	14.4286	6.45265	114.421	78.5906	5
39.92	109.848	5.01756	2.24392	116.078	103.618	5		105.628	28.5187	12.754	141.039	70.2173	5
40	106.002	6.25751	2.79844	113.772	98.2323	5		96.656	14.5429	6.50376	114.713	78.5987	5
40.08	114.468	12.8969	5.76766	130.482	98.4544	5		92.272	13.9826	6.25321	109.634	74.9103	5
40.17	113.582	22.8716	10.2285	141.981	85.1832	5		94.904	16.3105	7.2943	115.156	74.6518	5
40.25	108.584	16.7919	7.50955	129.434	87.7341	5		94.4	15.49	6.92734	113.633	75.1666	5
40.33	108.328	16.1812	7.23646	128.42	88.2364	5		99.808	4.59986	2.05712	105.519	94.0965	5
40.42	103.852	12.4634	5.57379	119.327	88.3767	5		95.798	11.4864	5.13687	110.06	81.5358	5
40.5	104.58	13.1115	5.86364	120.86	88.2999	5		98.306	12.9842	5.80671	114.428	82.184	5
40.58	110.352	14.6076	6.53272	128.49	92.2143	5		89.968	17.5459	7.84677	111.754	68.1819	5
40.67	108.778	9.62542	4.30462	120.73	96.8265	5		93.584	7.50304	3.35546	102.9	84.2677	5
40.75	109.87	12.9752	5.80269	125.981	93.7591	5		90.38	8.01081	3.58254	100.327	80.4333	5
40.83	108.118	13.2556	5.92808	124.577	91.659	5		84.406	5.95498	2.66315	91.8001	77.0119	5
40.92	107.488	12.1608	5.43847	122.588	92.3884	5		88.306	6.01173	2.68853	95.7705	80.8415	5
41	107.964	12.401	5.54592	123.362	92.5661	5		88.396	5.8212	2.60332	95.624	81.168	5
41.08	109.226	15.6543	7.00083	128.663	89.7886	5		86.044	5.51542	2.46657	92.8923	79.1957	5
41.17	112.782	17.4408	7.79977	134.438	91.1264	5		93	5.57226	2.49199	99.9189	86.0811	5
41.25	113.356	14.7929	6.61559	131.724	94.9882	5		94.528	19.0912	8.53786	118.233	70.8231	5
41.33	113.514	9.17686	4.10402	124.909	102.119	5		99.422	19.8717	8.88689	124.096	74.748	5
41.42	108.914	13.4012	5.99322	125.554	92.2742	5		98.756	13.7133	6.13275	115.783	81.7287	5
41.5	106.958	12.5535	5.61411	122.545	91.3707	5		96.464	12.4808	5.5816	111.961	80.967	5
41.58	101.61	10.3398	4.62408	114.449	88.7715	5		89.774	8.19084	3.66306	99.9443	79.6037	5
41.67	106.138	10.5766	4.72998	119.271	93.0055	5		96.032	13.6313	6.09611	112.958	79.1065	5
41.75	100.844	10.5678	4.72606	113.966	87.7224	5		98.306	19.8669	8.88476	122.974	73.638	5
41.83	101.4	10.2786	4.59673	114.163	88.6374	5		96.698	12.0697	5.39772	111.684	81.7115	5
41.92	102.274	10.5345	4.71117	115.354	89.1937	5		104.592	14.0218	6.27076	122.002	87.1816	5
42	99.1	8.84753	3.95673	110.086	88.1143	5		101.326	20.213	9.03954	126.424	76.2282	5
42.08	98.422	8.49844	3.80062	108.974	87.8698	5		106.692	11.102	4.96494	120.477	92.9071	5
42.17	104.282	15.232	6.81198	123.195	85.3689	5		110.69	12.0242	5.37739	125.62	95.76	5
42.25	107.05	16.0053	7.15777	126.923	87.1768	5		107.51	12.6034	5.63639	123.159	91.8609	5
42.33	107.79	13.6713	6.114	124.765	90.8148	5		97.364	11.976	5.35584	112.234	82.4938	5
42.42	101.164	10.8557	4.85483	114.643	87.6848	5		94.3	7.11384	3.18141	103.133	85.467	5
42.5	107.644	6.43723	2.87882	115.637	99.6511	5		91.512	11.4332	5.11308	105.708	77.3158	5
42.58	105.136	8.46318	3.78485	115.644	94.6276	5		87.768	5.2092	2.32962	94.2361	81.2999	5
42.67	113.742	6.11959	2.73676	121.34	106.144	5		93.364	9.99574	4.47023	105.775	80.9527	5
42.75	111.334	13.4942	6.03479	128.089	94.5787	5		95.638	15.012	6.71357	114.278	76.9981	5
42.83	114.828	16.5508	7.40176	135.379	94.2774	5		92.334	11.7284	5.24511	106.897	77.7713	5
42.92	113.74	15.5111	6.93677	133	94.4804	5		88.636	10.0489	4.49399	101.113	76.1587	5
43	110.208	19.6958	8.80825	134.664	85.7524	5		94.874	15.4715	6.91907	114.084	75.6636	5
43.08	118.072	19.292	8.62763	142.026	94.1179	5		89.99	11.043	4.93859	103.702	76.2783	5
43.17	111.082	19.1745	8.57508	134.89	87.2738	5		94.608	13.8823	6.20833	111.845	77.3709	5
43.25	107.716	17.1345	7.66277	128.991	86.4407	5		94.906	10.0651	4.50127	107.404	82.4085	5
43.33	112.742	15.6348	6.99208	132.155	93.3289	5		92.152	10.7934	4.82697	105.554	78.7502	5
43.42	115.65	12.3165	5.50812	130.943	100.357	5		93.902	8.59342	3.84309	104.572	83.2319	5
43.5	117.004	13.135	5.87416	133.313	100.695	5		89.602	14.522	6.49445	107.633	71.5705	5
43.58	108.514	13.6215	6.09172	125.427	91.6007	5		91.876	14.2288	6.3633	109.543	74.2087	5
43.67	101.854	12.5574	5.61583	117.446	86.262	5		94.212	14.8257	6.63028	112.621	75.8034	5
43.75	100.838	11.8171	5.28478	115.511	86.1651	5		98.206	13.0042	5.81567	114.353	82.0591	5
43.83	103.34	8.6057	3.84859	114.025	92.6546	5		101.362	14.1657	6.33507	118.951	83.773	5
43.92	104.246	12.0337	5.38163	119.188	89.3042	5		97.912	11.1224	4.97411	111.722	84.1017	5
44	109.146	7.07326	3.16326	117.929	100.363	5		103.674	19.1815	8.57822	127.491	79.857	5
44.08	112.078	15.0289	6.72111	130.739	93.4172	5		105.8	25.2011	11.2703	137.091	74.5087	5
44.17	103.642	11.6914	5.22853	118.159	89.1253	5		104.674	26.0911	11.6683	137.07	72.2776	5
44.25	101.832	10.7176	4.79305	115.14	88.5244	5		101.152	27.3444	12.2288	135.105	67.1994	5
44.33	110.714	12.8138	5.73051	126.624	94.8035	5		101.81	27.1904	12.1599	135.571	68.0487	5
44.42	114.64	9.3797	4.19473	126.286	102.994	5		92.76	10.8238	4.84057	106.2	79.3204	5
44.5	109.688	10.4576	4.67678	122.673	96.7032	5		94.98	11.0565	4.94461	108.708	81.2516	5
44.58	109.01	7.58864	3.39374	118.433	99.5875	5		97.364	15.7084	7.02502	116.869	77.8594	5
44.67	103.422	9.85117	4.40558	115.654	91.1902	5		93.688	8.0881	3.61711	103.731	83.6453	5
44.75	100.308	9.61229	4.29875	112.243	88.3728	5		93.334	11.7731	5.2651	107.952	78.7157	5
44.83	109.284	17.4483	7.80312	130.949	87.6191	5		95.578	5.30319	2.37166	102.163	88.9932	5
44.92	108.576	19.1089	8.54574	132.303	84.8492	5		99.37	8.40775	3.76006	109.81	88.9304	5
45	109.09	10.4896	4.69111	122.115	96.0654	5		97.482	10.8761	4.86393	110.986	83.9776	5
45.08	115.572	18.5718	8.30554	138.632	92.5121	5		100.668	17.4442	7.80129	122.328	79.0082	5
45.17	114.472	21.6717	9.6919	141.381	87.563	5		103.942	11.0428	4.9385	117.653	90.2305	5
45.25	117.584	12.423	5.55571	133.009	102.159	5		101.28	13.669	6.11297	118.252	84.3077	5
45.33	112.262	11.2122	5.01423	126.184	98.3403	5		102.09	11.638	5.20468	116.541	87.6395	5
45.42	108.252	13.1618	5.88615	124.595	91.9094	5		101.004	11.0003	4.9195	114.663	87.3453	5
45.5	108.152	8.6468	3.86697	118.888	97.4156	5		100.338	14.6467	6.55022	118.524	82.1517	5
45.58	104.674	14.8349	6.63438	123.094	86.254	5		93.18	9.04806	4.04642	104.415	81.9453	5
45.67	103.314	11.9014	5.32249	118.092	88.5364	5		94.192	6.88913	3.08091	102.746	85.638	5
45.75	101.756	14.7232	6.58443	120.037	83.4747	5		99.108	7.29034	3.26034	108.16	90.0558	5
45.83	107.426	17.1008	7.64769	128.659	86.1926	5		95.136	9.45403	4.22797	106.875	83.3973	5
45.92	108.782	17.0933	7.64436	130.006	87.5579	5		97.16	7.38636	3.30328	106.331	87.9886	5
46	118.782	25.0262	11.1921	149.856	87.7078	5		99.164	7.04336	3.14989	107.909	90.4185	5
46.08	116.906	15.5729	6.96443	136.242	97.5696	5		101.268	12.5707	5.6218	116.877	85.6594	5
46.17	118.142	18.2514	8.1623	140.804	95.4798	5		99.804	11.9501	5.34425	114.642	84.966	5
46.25	113.948	7.39968	3.30924	123.136	104.76	5		96.408	19.8197	8.86363	121.017	71.7986	5
46.33	117.578	10.7437	4.80474	130.918	104.238	5		97.148	11.456	5.12327	111.372	82.9235	5
46.42	113.184	8.58502	3.83934	123.844	102.524	5		93.418	6.44274	2.88128	101.418	85.4183	5
46.5	112.02	9.5445	4.26843	123.871	100.169	5		90.656	5.43836	2.43211	97.4086	83.9034	5
46.58	104.378	10.7598	4.81194	117.738	91.0179	5		91.45	9.78839	4.3775	103.604	79.2961	5
46.67	109.266	20.6683	9.24316	134.929	83.6029	5		104.142	17.2873	7.7311	125.607	82.677	5
46.75	110.67	16.0853	7.19357	130.643	90.6974	5		101.052	16.8366	7.52956	121.957	80.1466	5
46.83	111.902	20.5187	9.17623	137.379	86.4247	5		102.062	19.5988	8.76487	126.397	77.7268	5
46.92	116.664	18.0441	8.06957	139.069	94.2593	5		108.378	7.72366	3.45413	117.968	98.7878	5
47	105.922	16.627	7.4358	126.567	85.2769	5		99.488	17.8333	7.9753	121.631	77.345	5
47.08	108.674	13.0816	5.85026	124.917	92.4311	5		94.23	17.9145	8.01161	116.474	71.9862	5
47.17	114.84	18.6326	8.33275	137.975	91.7046	5		103.776	19.9504	8.92208	128.548	79.0043	5
47.25	116.836	21.7861	9.74303	143.887	89.785	5		107.016	21.1516	9.45929	133.279	80.7528	5
47.33	115.726	21.7452	9.72474	142.726	88.7258	5		104.542	14.3789	6.43046	122.396	86.6882	5
47.42	119.412	15.2801	6.83349	138.385	100.439	5		100.92	16.4843	7.37199	121.388	80.4521	5
47.5	113.86	20.9467	9.36764	139.869	87.8513	5		102.314	16.4583	7.3604	122.75	81.8783	5
47.58	113.158	17.5227	7.8364	134.915	91.4007	5		105.814	19.749	8.83203	130.336	81.2924	5
47.67	112.684	21.4062	9.57313	139.263	86.1047	5		113.358	23.7733	10.6318	142.876	83.8395	5
47.75	121.204	19.8459	8.87535	145.846	96.5621	5		107.04	26.6441	11.9156	140.123	73.957	5
47.83	126.594	10.0079	4.47567	139.02	114.168	5		118.99	28.8336	12.8948	154.792	83.1884	5
47.92	122.344	16.6662	7.45335	143.038	101.65	5		105.312	12.9506	5.79167	121.392	89.2318	5

## Sheet: Figure 9B
			Baseline							+ Tamoxifen						Diastolic BP day	Control	Stim1 smKO		Diastolic BP night	Control	Stim1 smKO
Time (h)	Mean	SD	SEM	Upper limit	Lower limit	N		Mean	SD	SEM	Upper limit	Lower limit	N			Mouse 1	92.5298	89.4685		Mouse 1	105.74	101.579
0	101.438	16.2424	7.26381	121.606	81.2704	5		89.994	15.9336	7.12572	109.778	70.2098	5			Mouse 2	97.9802	90.6917		Mouse 2	107.772	102.186
0.08	97.942	10.2166	4.56901	110.628	85.2564	5		86.29	12.8011	5.72484	102.185	70.3953	5			Mouse 3	76.8072	79.2127		Mouse 3	88.921	90.312
0.17	100.004	13.7021	6.12776	117.017	82.9906	5		93.15	10.3928	4.6478	106.054	80.2456	5			Mouse 4	72.1703	71.4842		Mouse 4	88.6116	86.2359
0.25	102.09	16.7978	7.51221	122.947	81.2328	5		85.476	11.2295	5.02198	99.4192	71.5328	5			Mouse 5	83.0535	66.0932		Mouse 5	97.3785	81.2557
0.33	95.866	6.70547	2.99878	104.192	87.5401	5		93.564	15.9999	7.15537	113.431	73.6975	5
0.42	99.244	17.6276	7.88329	121.132	77.3565	5		88.858	15.6516	6.99962	108.292	69.4239	5		Paired t test				Paired t test
0.5	93.916	12.5781	5.62511	109.534	78.2982	5		92.488	16.301	7.29002	112.728	72.2477	5		P value	0.2021			P value	0.1408
0.58	94.636	13.2268	5.9152	111.059	78.2128	5		90.456	19.5833	8.75793	114.772	66.1401	5		Significantly different (P < 0.05)?	No			Significantly different (P < 0.05)?	No
0.67	94.536	13.0259	5.82535	110.71	78.3622	5		87.572	16.6797	7.45939	108.283	66.8614	5		One- or two-tailed P value?	Two-tailed			One- or two-tailed P value?	Two-tailed
0.75	99.632	9.34716	4.18018	111.238	88.026	5		88.65	24.4304	10.9256	118.984	58.3156	5
0.83	96.448	18.002	8.05072	118.8	74.0956	5		80.4	16.6848	7.46167	101.117	59.6831	5		Mean of differences (B - A)	-5.118			Mean of differences (B - A)	-5.371
0.92	93.904	15.749	7.04318	113.459	74.349	5		85.04	14.2172	6.35811	102.693	67.387	5		SD of differences	7.507			SD of differences	6.554
1	97.082	20.8828	9.33906	123.011	71.1526	5		89.98	17.5885	7.86579	111.819	68.1411	5		SEM of differences	3.357			SEM of differences	2.931
1.08	93.15	14.2241	6.36121	110.812	75.4884	5		92.544	9.63257	4.30782	104.504	80.5836	5		95% confidence interval	-14.44 to 4.203			95% confidence interval	-13.51 to 2.766
1.17	99.074	9.34094	4.1774	110.672	87.4757	5		92.406	11.3778	5.0883	106.533	78.2786	5
1.25	96.998	9.84694	4.40369	109.225	84.7714	5		93.76	10.5698	4.72695	106.884	80.6359	5
1.33	100.438	13.6106	6.08686	117.338	83.5382	5		90.562	11.8231	5.28747	105.242	75.8816	5
1.42	103.03	10.2891	4.60142	115.806	90.2544	5		90.178	12.6206	5.64412	105.849	74.5074	5
1.5	101.746	9.34432	4.17891	113.349	90.1435	5		88.098	4.91085	2.1962	94.1956	82.0004	5
1.58	96.378	16.8745	7.54652	117.33	75.4255	5		94.634	5.96994	2.66984	102.047	87.2213	5
1.67	104.224	21.6371	9.67642	131.09	77.3579	5		89.978	11.2564	5.03403	103.955	76.0013	5
1.75	103.262	14.0525	6.28447	120.71	85.8135	5		91.484	12.3803	5.53666	106.856	76.1118	5
1.83	97.916	5.78853	2.58871	105.103	90.7286	5		96.266	7.89829	3.53222	106.073	86.459	5
1.92	92.274	14.1479	6.32714	109.841	74.7071	5		89.594	7.00997	3.13495	98.298	80.89	5
2	93.28	8.61284	3.85178	103.974	82.5858	5		92.498	10.1979	4.56066	105.16	79.8356	5
2.08	97.58	14.7701	6.60538	115.919	79.2405	5		89.154	7.77385	3.47657	98.8065	79.5015	5
2.17	93.936	9.68654	4.33195	105.963	81.9086	5		95.48	9.94643	4.44818	107.83	83.1299	5
2.25	93.482	7.18128	3.21157	102.399	84.5653	5		93.514	6.60732	2.95488	101.718	85.3099	5
2.33	95.172	4.12523	1.84486	100.294	90.0499	5		92.198	9.03315	4.03975	103.414	80.9819	5
2.42	98.038	12.9958	5.81188	114.174	81.9016	5		90.02	8.4541	3.78079	100.517	79.5228	5
2.5	98.396	8.39233	3.75316	108.816	87.9756	5		95	12.6035	5.63646	110.649	79.3507	5
2.58	94.978	11.1912	5.00486	108.874	81.0823	5		92.706	12.4996	5.59	108.226	77.1857	5
2.67	97.018	11.4112	5.10325	111.187	82.8491	5		88.772	13.3956	5.99071	105.405	72.1391	5
2.75	101.494	14.5019	6.48544	119.5	83.4875	5		81.472	9.74069	4.35617	93.5667	69.3773	5
2.83	100.964	11.1817	5.00059	114.848	87.0801	5		88.46	5.93424	2.65387	95.8283	81.0917	5
2.92	96.54	13.21	5.90769	112.942	80.1376	5		90.826	8.19775	3.66614	101.005	80.6472	5
3	100.198	12.8532	5.74815	116.157	84.2386	5		85.114	6.79372	3.03825	93.5495	76.6785	5
3.08	99.508	12.4399	5.56329	114.954	84.0618	5		83.516	7.216	3.22709	92.4758	74.5562	5
3.17	97.398	16.7321	7.48283	118.174	76.6223	5		89.352	15.2167	6.8051	108.246	70.458	5
3.25	100.512	13.5192	6.04596	117.298	83.7257	5		90.348	11.5414	5.16147	104.679	76.0175	5
3.33	101.962	9.31701	4.16669	113.531	90.3934	5		95.916	17.2846	7.72992	117.378	74.4543	5
3.42	99.454	9.07937	4.06042	110.728	88.1805	5		87.23	17.924	8.01584	109.486	64.9745	5
3.5	99.108	11.7781	5.2673	113.732	84.4836	5		88.518	22.3653	10.0021	116.288	60.7478	5
3.58	103.476	9.42453	4.21478	115.178	91.7739	5		88.248	23.4655	10.4941	117.384	59.1118	5
3.67	110.47	17.9821	8.04185	132.798	88.1422	5		84.826	20.1389	9.00641	109.832	59.8202	5
3.75	96.186	6.41405	2.86845	104.15	88.2219	5		84.494	14.2878	6.38969	102.235	66.7534	5
3.83	97.242	7.61999	3.40777	106.703	87.7805	5		84.112	16.6112	7.42877	104.738	63.4864	5
3.92	94.894	4.16681	1.86346	100.068	89.7202	5		86.882	17.2534	7.71594	108.305	65.4591	5
4	96.39	7.37247	3.29707	105.544	87.2359	5		91.766	18.6531	8.34194	114.927	68.6051	5
4.08	97.654	13.2902	5.94355	114.156	81.1521	5		92.02	12.722	5.68947	107.816	76.2235	5
4.17	94.68	13.8944	6.21377	111.932	77.4278	5		90.028	14.1864	6.34436	107.643	72.4132	5
4.25	96.88	11.6305	5.20134	111.321	82.4388	5		85.532	15.4912	6.92786	104.767	66.2972	5
4.33	99.044	11.0866	4.95809	112.81	85.2781	5		91.622	15.6732	7.00927	111.083	72.1611	5
4.42	102.054	9.10144	4.07029	113.355	90.7531	5		94.356	14.5095	6.48884	112.372	76.3401	5
4.5	102.208	7.85011	3.51068	111.955	92.4608	5		92.956	10.4637	4.6795	105.948	79.9636	5
4.58	106.236	12.2525	5.47948	121.449	91.0225	5		93.668	3.90656	1.74707	98.5186	88.8174	5
4.67	100.808	9.71728	4.3457	112.874	88.7424	5		94.99	9.05986	4.05169	106.239	83.7407	5
4.75	98.782	13.4917	6.03367	115.534	82.0298	5		96.856	11.0284	4.93206	110.55	83.1624	5
4.83	102.65	16.1935	7.24197	122.757	82.5431	5		91.234	4.26659	1.90808	96.5317	85.9363	5
4.92	101.654	9.70185	4.3388	113.7	89.6076	5		90.606	2.6192	1.17134	93.8582	87.3538	5
5	98.478	4.73536	2.11772	104.358	92.5983	5		90.442	9.99187	4.4685	102.849	78.0355	5
5.08	97.04	12.4209	5.55481	112.463	81.6174	5		95.784	9.05509	4.04956	107.027	84.5406	5
5.17	96.67	10.97	4.90593	110.291	83.049	5		97.024	6.97987	3.12149	105.691	88.3573	5
5.25	96.56	9.52848	4.26127	108.391	84.7288	5		92.302	5.70582	2.55172	99.3867	85.2173	5
5.33	93.11	8.26204	3.6949	103.369	82.8513	5		97.252	8.07524	3.61136	107.279	87.2253	5
5.42	93.114	15.3927	6.88383	112.227	74.0014	5		96.754	8.63995	3.8639	107.482	86.0261	5
5.5	95.148	10.4045	4.65304	108.067	82.2291	5		96.26	5.52048	2.46883	103.115	89.4054	5
5.58	93.254	11.5189	5.15141	107.557	78.9514	5		94.676	12.3508	5.52345	110.012	79.3404	5
5.67	95.37	10.0094	4.47635	107.798	82.9417	5		87.774	15.0332	6.72305	106.44	69.1078	5
5.75	98.036	11.9519	5.34503	112.876	83.1958	5		88.894	20.6891	9.25244	114.583	63.2051	5
5.83	97.162	5.50235	2.46072	103.994	90.3299	5		88.296	15.1617	6.78054	107.122	69.4702	5
5.92	101.872	16.1541	7.22433	121.93	81.8141	5		83.866	7.30473	3.26677	92.936	74.796	5
6	103.26	9.40578	4.20639	114.939	91.5812	5		86.992	12.1846	5.44914	102.121	71.8628	5
6.08	101.9	9.27126	4.14624	113.412	90.3882	5		83.954	10.3388	4.62363	96.7913	71.1167	5
6.17	101.46	15.3017	6.84315	120.46	82.4604	5		89.356	9.62207	4.30312	101.303	77.4086	5
6.25	100.468	11.5365	5.15927	114.792	86.1436	5		85.468	11.8774	5.31174	100.216	70.7203	5
6.33	104.036	12.3589	5.52705	119.382	88.6905	5		85.112	14.4158	6.44695	103.012	67.2124	5
6.42	97.842	5.82876	2.6067	105.079	90.6046	5		82.446	7.96449	3.56183	92.3352	72.5568	5
6.5	101.016	7.37375	3.29764	110.172	91.8603	5		89.022	9.37096	4.19082	100.658	77.3864	5
6.58	102.102	18.2713	8.17117	124.789	79.4152	5		91.36	11.8162	5.28436	106.032	76.6883	5
6.67	98.176	11.0732	4.95207	111.925	84.4268	5		95.852	15.5416	6.95044	115.15	76.5545	5
6.75	100.472	13.2843	5.94092	116.967	83.9774	5		93.01	6.40232	2.86321	100.96	85.0605	5
6.83	100.182	13.7193	6.13548	117.217	83.1472	5		92.474	14.4846	6.47772	110.459	74.489	5
6.92	95.402	8.48724	3.79561	105.94	84.8637	5		92.752	11.7844	5.27015	107.384	78.1197	5
7	93.696	12.4985	5.58951	109.215	78.177	5		86.964	9.99124	4.46822	99.3698	74.5582	5
7.08	91.186	11.5226	5.15309	105.493	76.8787	5		91.838	18.813	8.41344	115.197	68.4786	5
7.17	94.232	4.77852	2.13702	100.165	88.2987	5		90.864	6.64827	2.9732	99.1189	82.6091	5
7.25	92.456	8.53541	3.81715	103.054	81.8579	5		90.596	13.4467	6.01356	107.292	73.8997	5
7.33	92.064	10.4143	4.65743	104.995	79.1329	5		89.69	5.87192	2.626	96.9809	82.3991	5
7.42	91.136	12.0238	5.37719	106.065	76.2065	5		93.688	7.00703	3.13364	102.388	84.9876	5
7.5	91.61	11.7526	5.25594	106.203	77.0172	5		90.304	2.99428	1.33908	94.0219	86.5861	5
7.58	91.742	10.5513	4.71871	104.843	78.6408	5		90.254	6.50365	2.90852	98.3293	82.1787	5
7.67	90.698	9.64243	4.31223	102.671	78.7253	5		90.892	10.2575	4.5873	103.628	78.1556	5
7.75	86.662	14.7916	6.61499	105.028	68.2958	5		93.038	15.6546	7.00093	112.476	73.6003	5
7.83	90.346	13.8015	6.17221	107.483	73.2092	5		91.396	13.0337	5.82885	107.579	75.2125	5
7.92	89.578	15.2651	6.82678	108.532	70.6238	5		98.228	9.60559	4.29575	110.155	86.3011	5
8	90.706	11.8256	5.28855	105.389	76.0226	5		91.618	11.228	5.0213	105.559	77.6766	5
8.08	96.46	17.8399	7.97823	118.611	74.3089	5		90.684	9.31863	4.16742	102.255	79.1134	5
8.17	92.014	9.63228	4.30769	103.974	80.0539	5		90.82	13.9946	6.25856	108.197	73.4435	5
8.25	87.172	13.4898	6.03282	103.922	70.4222	5		92.458	20.0005	8.94448	117.292	67.6242	5
8.33	96.04	15.1419	6.77164	114.841	77.2389	5		86.438	20.1098	8.99339	111.408	61.4683	5
8.42	92.09	9.63673	4.30968	104.056	80.1244	5		83.908	20.6985	9.25664	109.609	58.2074	5
8.5	100.202	12.4446	5.56538	115.654	84.75	5		81.67	16.6249	7.4349	102.313	61.0274	5
8.58	98.324	11.5911	5.18371	112.716	83.9317	5		84.934	15.6394	6.99417	104.353	65.5151	5
8.67	97.398	13.7217	6.13655	114.436	80.3602	5		87.68	21.2633	9.50924	114.082	61.2781	5
8.75	101.226	11.817	5.28474	115.899	86.5532	5		89.346	17.2014	7.69272	110.704	67.9876	5
8.83	101.374	9.38088	4.19526	113.022	89.7261	5		92.244	14.8792	6.65417	110.719	73.7691	5
8.92	96.514	10.1763	4.551	109.15	83.8784	5		92.692	13.9883	6.25578	110.061	75.3232	5
9	96.816	7.84185	3.50698	106.553	87.0791	5		93.71	12.1783	5.44631	108.831	78.5886	5
9.08	102.756	9.37285	4.19167	114.394	91.1181	5		93.896	4.92831	2.20401	100.015	87.7767	5
9.17	102.6	18.856	8.43268	126.013	79.1871	5		85.808	9.51324	4.25445	97.6202	73.9958	5
9.25	102.142	13.6547	6.10659	119.097	85.1874	5		88.55	13.0122	5.81922	104.707	72.3933	5
9.33	99.378	10.9643	4.90339	112.992	85.764	5		94.462	15.7445	7.04113	114.011	74.9127	5
9.42	102.086	13.528	6.04989	118.883	85.2888	5		98.294	11.2891	5.04862	112.311	84.2768	5
9.5	94.792	8.66042	3.87306	105.545	84.0387	5		89.458	7.58331	3.39136	98.8739	80.0421	5
9.58	97.126	8.78826	3.93023	108.038	86.2139	5		99.276	9.41189	4.20913	110.962	87.5896	5
9.67	96.836	3.48245	1.5574	101.16	92.512	5		94.182	7.04962	3.15269	102.935	85.4287	5
9.75	101.522	11.3743	5.08676	115.645	87.3989	5		99.176	10.3986	4.6504	112.088	86.2644	5
9.83	93.604	5.21297	2.33131	100.077	87.1312	5		93.442	10.7271	4.79732	106.761	80.1225	5
9.92	94.356	13.8505	6.19415	111.554	77.1583	5		91.568	17.4262	7.79324	113.206	69.9305	5
10	93.612	9.77556	4.37176	105.75	81.474	5		93.72	13.5572	6.06295	110.553	76.8866	5
10.08	96.628	14.4183	6.44807	114.531	78.7253	5		90.714	21.3888	9.56535	117.272	64.1563	5
10.17	94.506	15.2936	6.83951	113.496	75.5165	5		88.882	16.8804	7.54913	109.842	67.9223	5
10.25	95.398	10.8168	4.83742	108.829	81.9672	5		85.572	21.0757	9.42535	111.741	59.403	5
10.33	101.716	12.3381	5.51778	117.036	86.3962	5		92.428	17.9194	8.01379	114.678	70.1781	5
10.42	101.36	5.15065	2.30344	107.755	94.9646	5		94.396	15.0073	6.71148	113.03	75.762	5
10.5	100.762	11.0915	4.96026	114.534	86.9901	5		94.09	12.9116	5.77426	110.122	78.0581	5
10.58	104.556	13.2461	5.92382	121.003	88.1088	5		96.14	16.0448	7.17545	116.062	76.2178	5
10.67	101.746	9.61016	4.29779	113.679	89.8134	5		96.2	8.42714	3.76873	106.664	85.7363	5
10.75	104.098	10.1971	4.56029	116.759	91.4366	5		92.128	7.65815	3.42483	101.637	82.6191	5
10.83	104.01	13.0565	5.83904	120.222	87.7982	5		95.256	11.0231	4.92967	108.943	81.569	5
10.92	101.08	16.5849	7.41697	121.673	80.4872	5		96.402	7.59791	3.39789	105.836	86.968	5
11	99.5	10.9433	4.894	113.088	85.9121	5		96.738	9.66958	4.32437	108.744	84.7316	5
11.08	98.792	14.7403	6.59205	117.094	80.4895	5		100.412	11.6069	5.19074	114.824	86.0002	5
11.17	95.558	14.4744	6.47314	113.53	77.5857	5		94.384	13.2588	5.9295	110.847	77.9211	5
11.25	99.952	8.06718	3.60775	109.969	89.9353	5		93.828	16.8081	7.5168	114.698	72.958	5
11.33	100.964	10.2376	4.57838	113.676	88.2524	5		95.764	19.3112	8.63625	119.742	71.7859	5
11.42	102.308	5.24886	2.34736	108.825	95.7907	5		93.832	12.5651	5.61926	109.434	78.2304	5
11.5	95.93	4.51865	2.0208	101.541	90.3194	5		90.478	17.7372	7.93232	112.502	68.4544	5
11.58	91.41	4.59254	2.05385	97.1124	85.7076	5		87.114	12.5427	5.60928	102.688	71.5401	5
11.67	90.932	6.97357	3.11868	99.5908	82.2732	5		87.878	9.60883	4.2972	99.8089	75.9471	5
11.75	93.35	6.01062	2.68803	100.813	85.8868	5		88.914	17.0816	7.63914	110.124	67.7043	5
11.83	88.51	12.5168	5.59769	104.052	72.9683	5		93.982	12.3135	5.50678	109.271	78.6927	5
11.92	90.11	11.05	4.94169	103.83	76.3897	5		98.028	21.0075	9.39486	124.112	71.9437	5
12	93.706	15.6347	6.99205	113.119	74.2929	5		86.346	19.0348	8.51262	109.981	62.7112	5
12.08	97.51	15.8626	7.09395	117.206	77.814	5		81.978	17.2605	7.71913	103.41	60.5463	5
12.17	95.44	16.3454	7.30989	115.735	75.1445	5		77.544	17.2449	7.71217	98.9564	56.1316	5
12.25	95.674	15.7499	7.04356	115.23	76.1179	5		79.852	18.9015	8.45303	103.321	56.3826	5
12.33	101.72	13.6224	6.09211	118.634	84.8056	5		80.026	18.9678	8.48267	103.578	56.4743	5
12.42	103.048	13.333	5.96272	119.603	86.4928	5		83.808	17.6296	7.88422	105.698	61.9179	5
12.5	98.634	9.14846	4.09132	109.993	87.2747	5		86.786	4.12575	1.84509	91.9088	81.6632	5
12.58	96.204	16.5765	7.41323	116.786	75.6216	5		87.786	3.41592	1.52764	92.0274	83.5446	5
12.67	97.034	18.8068	8.41067	120.386	73.6822	5		89.278	10.1269	4.52887	101.852	76.7039	5
12.75	88.732	16.7886	7.50808	109.578	67.8862	5		88.52	8.68078	3.88216	99.2986	77.7414	5
12.83	94.254	20.3653	9.10764	119.541	68.9671	5		92.074	14.9832	6.70068	110.678	73.4699	5
12.92	87.414	16.3172	7.29727	107.674	67.1535	5		81.592	11.5769	5.17733	95.9666	67.2174	5
13	85.294	9.54318	4.26784	97.1434	73.4446	5		80.826	11.4133	5.10416	94.9974	66.6546	5
13.08	83.252	8.29996	3.71185	93.5578	72.9462	5		80.638	13.0251	5.82502	96.8108	64.4652	5
13.17	80.634	8.28098	3.70337	90.9162	70.3518	5		79.038	18.2342	8.15457	101.679	56.3973	5
13.25	88.742	9.37803	4.19398	100.386	77.0976	5		77.054	9.15669	4.095	88.4235	65.6845	5
13.33	88.876	7.62215	3.40873	98.3402	79.4118	5		79.758	12.4936	5.58731	95.2709	64.2451	5
13.42	88.968	16.5994	7.42347	109.579	68.3571	5		81.312	11.7927	5.27386	95.9546	66.6694	5
13.5	89.358	13.8019	6.1724	106.495	72.2207	5		76.57	14.8518	6.64195	95.011	58.129	5
13.58	92.656	17.2647	7.72099	114.093	71.2191	5		78.232	18.1807	8.13064	100.806	55.6577	5
13.67	91.928	14.623	6.53961	110.085	73.7711	5		71.752	12.9536	5.79301	87.836	55.668	5
13.75	88.806	12.9633	5.79739	104.902	72.7099	5		74.412	12.792	5.72074	90.2953	58.5287	5
13.83	88.23	21.4297	9.58366	114.839	61.6215	5		75.352	10.7224	4.79522	88.6657	62.0383	5
13.92	87.208	15.2254	6.80901	106.113	68.3032	5		72.908	11.0722	4.95162	86.6559	59.1601	5
14	82.726	11.009	4.92337	96.3955	69.0565	5		77.638	12.5939	5.63218	93.2754	62.0006	5
14.08	82.462	16.5168	7.38655	102.97	61.9536	5		77.802	21.5682	9.64557	104.582	51.0216	5
14.17	78.546	12.6766	5.66914	94.2861	62.8059	5		74.084	19.0943	8.53922	97.7927	50.3753	5
14.25	80.308	11.8139	5.28333	94.9769	65.6391	5		74.074	14.606	6.532	92.2097	55.9383	5
14.33	89.442	5.49036	2.45536	96.2592	82.6248	5		94.324	24.6777	11.0362	124.965	63.6825	5
14.42	84.096	8.23434	3.68251	94.3203	73.8717	5		74.98	12.1629	5.43941	90.0822	59.8778	5
14.5	90.42	14.1558	6.33066	107.997	72.8433	5		77.184	14.0141	6.26728	94.5847	59.7833	5
14.58	87.222	14.608	6.53291	105.36	69.0837	5		93.048	13.4578	6.0185	109.758	76.338	5
14.67	87.98	15.5942	6.97394	107.343	68.6172	5		93.144	19.5894	8.76064	117.467	68.8206	5
14.75	85.454	11.0261	4.93104	99.1448	71.7632	5		89.258	23.1345	10.346	117.983	60.5328	5
14.83	85.63	10.6386	4.75772	98.8396	72.4204	5		81.878	10.1201	4.52583	94.4437	69.3123	5
14.92	86.35	13.4209	6.00199	103.014	69.6858	5		82.048	15.8316	7.0801	101.706	62.3905	5
15	81.782	12.3482	5.52227	97.1143	66.4497	5		78.808	16.1069	7.20321	98.8073	58.8087	5
15.08	81.94	7.78588	3.48195	91.6074	72.2726	5		78.336	11.8605	5.30419	93.0628	63.6092	5
15.17	85.828	17.611	7.87589	107.695	63.961	5		76.276	17.6892	7.91083	98.24	54.312	5
15.25	87.466	14.2456	6.37083	105.154	69.7777	5		78.89	21.9477	9.81533	106.142	51.6383	5
15.33	85.154	14.9256	6.67495	103.687	66.6214	5		72.25	22.6916	10.148	100.425	44.0746	5
15.42	95.756	18.4696	8.25984	118.689	72.823	5		79.222	19.7958	8.85293	103.802	54.6423	5
15.5	90.386	22.4591	10.044	118.273	62.4994	5		69.894	13.7056	6.12933	86.9118	52.8762	5
15.58	89.106	15.5557	6.95673	108.421	69.791	5		73.518	13.7471	6.1479	90.5873	56.4487	5
15.67	84.578	12.7807	5.7157	100.447	68.7087	5		74.902	11.4003	5.09837	89.0573	60.7467	5
15.75	81.626	13.1413	5.87696	97.9431	65.3089	5		82.256	9.31501	4.1658	93.8221	70.6899	5
15.83	85.944	8.79507	3.93328	96.8645	75.0235	5		83.636	9.78036	4.37391	95.7799	71.4921	5
15.92	83.186	11.5766	5.17719	97.5602	68.8118	5		83.282	17.7345	7.93112	105.302	61.2617	5
16	80.866	14.1899	6.34593	98.4851	63.2469	5		79.656	18.463	8.25689	102.581	56.7312	5
16.08	81.62	15.388	6.88173	100.727	62.5133	5		76.776	18.4803	8.26465	99.7224	53.8296	5
16.17	81.968	13.3862	5.9865	98.5892	65.3468	5		77.014	16.2988	7.28902	97.2516	56.7764	5
16.25	80.26	12.3198	5.50958	95.5571	64.9629	5		76.19	6.60506	2.95387	84.3913	67.9887	5
16.33	83.018	12.7077	5.68304	98.7967	67.2393	5		77.23	8.14313	3.64172	87.341	67.119	5
16.42	85.504	9.7372	4.35461	97.5943	73.4137	5		72.436	6.88116	3.07735	80.9801	63.8919	5
16.5	81.634	12.5728	5.62271	97.2451	66.0229	5		76.71	12.3599	5.52752	92.0568	61.3632	5
16.58	91.452	17.7092	7.91978	113.441	69.4632	5		75.018	14.492	6.48102	93.0122	57.0238	5
16.67	96.274	19.2264	8.59833	120.147	72.4012	5		79.664	20.8134	9.30804	105.507	53.8208	5
16.75	90.592	21.3745	9.55895	117.132	64.0521	5		77.092	19.0239	8.50775	100.713	53.4707	5
16.83	89.502	17.906	8.0078	111.735	67.2688	5		82.144	16.6466	7.44459	102.813	61.4745	5
16.92	87.548	14.5686	6.5153	105.637	69.4586	5		80.782	21.8	9.74925	107.85	53.7137	5
17	85.376	18.5864	8.31207	108.454	62.298	5		82.262	16.0565	7.18069	102.199	62.3252	5
17.08	82.396	7.83907	3.50574	92.1295	72.6625	5		82.518	13.6425	6.10112	99.4574	65.5786	5
17.17	83.936	5.69826	2.54834	91.0113	76.8607	5		84.984	14.3968	6.43842	102.86	67.1081	5
17.25	84.542	3.17573	1.42023	88.4852	80.5988	5		78.368	13.9726	6.24874	95.7173	61.0187	5
17.33	83.808	10.0439	4.49176	96.2791	71.3369	5		74.032	16.2609	7.27209	94.2225	53.8415	5
17.42	81.978	9.42372	4.21442	93.6791	70.2769	5		74.01	7.39455	3.30694	83.1915	64.8285	5
17.5	91.956	22.2045	9.93016	119.527	64.3854	5		71.914	9.7254	4.34933	83.9897	59.8383	5
17.58	85.486	15.3425	6.86138	104.536	66.4357	5		75.504	16.0743	7.18864	95.4629	55.5451	5
17.67	86.548	19.6599	8.79215	110.959	62.1371	5		79.208	8.91573	3.98724	90.2783	68.1377	5
17.75	85.286	12.4525	5.56894	100.748	69.8241	5		75.902	9.3006	4.15935	87.4502	64.3538	5
17.83	81.958	13.4551	6.01732	98.6648	65.2512	5		81.866	10.9527	4.89819	95.4656	68.2664	5
17.92	83.66	11.6756	5.22148	98.1572	69.1628	5		82.93	15.9293	7.12382	102.709	63.1511	5
18	87.87	18.7951	8.40543	111.207	64.5328	5		68.932	8.49578	3.79943	79.4809	58.3831	5
18.08	90.842	21.9721	9.82624	118.124	63.56	5		64.928	11.5848	5.18087	79.3124	50.5436	5
18.17	84.618	14.836	6.63485	103.039	66.1967	5		67.044	11.2013	5.00938	80.9523	53.1357	5
18.25	77.894	12.8017	5.72509	93.7894	61.9986	5		62.74	5.39376	2.41216	69.4372	56.0428	5
18.33	79.48	13.1906	5.89902	95.8583	63.1017	5		64.832	9.47489	4.2373	76.5966	53.0674	5
18.42	78.29	9.54497	4.26864	90.1416	66.4384	5		73.588	8.31833	3.72007	83.9166	63.2594	5
18.5	76.548	9.97032	4.45886	88.9278	64.1682	5		77.416	21.4607	9.59751	104.063	50.769	5
18.58	82.516	14.8871	6.65773	101.001	64.0312	5		81.184	19.6788	8.8006	105.618	56.7496	5
18.67	83.778	12.778	5.71449	99.644	67.912	5		81.586	14.2806	6.38647	99.3177	63.8543	5
18.75	80.81	11.2443	5.02858	94.7716	66.8484	5		76.852	15.1121	6.75835	95.6162	58.0878	5
18.83	88.764	25.6293	11.4618	120.587	56.941	5		85.892	24.4577	10.9378	116.26	55.5238	5
18.92	81.018	8.88869	3.97514	92.0548	69.9812	5		80.794	22.5678	10.0926	108.816	52.7724	5
19	80.654	7.41768	3.31729	89.8643	71.4437	5		82.32	23.6572	10.5798	111.694	52.9457	5
19.08	80.79	9.97561	4.46123	93.1764	68.4036	5		77.156	19.0257	8.50854	100.78	53.5325	5
19.17	83.646	8.6665	3.87578	94.4069	72.8851	5		71.988	12.9641	5.79773	88.0851	55.8909	5
19.25	84.462	9.5507	4.2712	96.3208	72.6032	5		70.394	16.8442	7.53293	91.3088	49.4792	5
19.33	87.574	8.28335	3.70443	97.8591	77.2889	5		69.846	15.1592	6.77942	88.6687	51.0233	5
19.42	82.522	11.3716	5.08552	96.6417	68.4023	5		71.366	8.25925	3.69365	81.6212	61.1108	5
19.5	85.842	13.0836	5.85115	102.087	69.5966	5		68.672	12.8051	5.7266	84.5716	52.7724	5
19.58	81.952	15.7092	7.02537	101.458	62.4464	5		71.604	10.712	4.79056	84.9047	58.3033	5
19.67	87.056	21.9472	9.81509	114.307	59.8049	5		77.182	14.1629	6.33385	94.7676	59.5964	5
19.75	88.308	23.8907	10.6843	117.972	58.6437	5		83.622	19.6417	8.78404	108.01	59.2336	5
19.83	93.256	23.3586	10.4463	122.26	64.2524	5		85.514	17.8163	7.96771	107.636	63.3921	5
19.92	82.436	20.7183	9.26551	108.161	56.7108	5		81.858	22.8533	10.2203	110.234	53.4819	5
20	77.996	13.1038	5.8602	94.2665	61.7255	5		81.07	24.5866	10.9955	111.598	50.5417	5
20.08	78.786	13.7312	6.14078	95.8355	61.7365	5		79.586	17.9382	8.0222	101.859	57.3128	5
20.17	81.728	13.799	6.17109	98.8617	64.5943	5		81.446	14.2477	6.37174	99.1368	63.7552	5
20.25	83.892	7.13102	3.18909	92.7463	75.0377	5		77.894	8.96093	4.00745	89.0205	66.7675	5
20.33	83.372	14.6768	6.56366	101.596	65.1483	5		81.38	14.6963	6.57237	99.6278	63.1322	5
20.42	80.08	12.4844	5.5832	95.5815	64.5785	5		76.792	17.9557	8.03004	99.087	54.497	5
20.5	79.9	13.5018	6.0382	96.6647	63.1353	5		78.674	16.913	7.56372	99.6742	57.6738	5
20.58	83.472	10.4693	4.68203	96.4714	70.4726	5		78.368	17.5853	7.86439	100.203	56.533	5
20.67	79.386	10.3112	4.6113	92.189	66.583	5		80.086	24.7245	11.0571	110.786	49.3864	5
20.75	83.312	11.7465	5.25319	97.8972	68.7268	5		82.428	23.3008	10.4204	111.36	53.4962	5
20.83	94.268	16.6174	7.43154	114.901	73.6347	5		79.502	22.2438	9.94772	107.121	51.8827	5
20.92	86.782	21.1078	9.43969	112.991	60.5732	5		75.374	11.7773	5.26695	89.9974	60.7506	5
21	85.302	17.6727	7.90346	107.246	63.3585	5		75.228	9.71111	4.34294	87.2859	63.1701	5
21.08	81.48	16.4048	7.33646	101.849	61.1107	5		79.742	3.6678	1.64029	84.2962	75.1878	5
21.17	86.546	22.3675	10.003	114.319	58.7731	5		78.594	4.95191	2.21456	84.7426	72.4454	5
21.25	77.29	13.7854	6.16501	94.4068	60.1732	5		75.57	6.79557	3.03907	84.0078	67.1322	5
21.33	77.652	15.0819	6.74482	96.3786	58.9254	5		72.49	10.9093	4.87879	86.0357	58.9443	5
21.42	75.652	11.2776	5.04349	89.655	61.649	5		72.766	12.0475	5.3878	87.7249	57.8071	5
21.5	74.58	11.2342	5.02411	88.5292	60.6308	5		73.536	16.6165	7.43111	94.1681	52.9039	5
21.58	76.81	17.3942	7.77892	98.4077	55.2123	5		74.254	16.3433	7.30894	94.5469	53.9611	5
21.67	82.506	15.4691	6.91797	101.713	63.2986	5		79.316	20.2217	9.04342	104.425	54.2074	5
21.75	86.238	6.68494	2.98959	94.5384	77.9376	5		79.746	20.1099	8.99342	104.716	54.7763	5
21.83	84.872	17.1626	7.67533	106.182	63.5619	5		80.12	21.3939	9.56765	106.684	53.556	5
21.92	83.158	17.9579	8.03101	105.456	60.8603	5		75.69	15.4147	6.89368	94.8299	56.5501	5
22	80.604	13.7905	6.16732	97.7272	63.4808	5		78.522	10.6247	4.7515	91.7143	65.3297	5
22.08	85.572	15.052	6.73147	104.262	66.8824	5		74.57	7.91119	3.53799	84.393	64.747	5
22.17	84.946	8.21637	3.67447	95.148	74.744	5		80.996	16.0099	7.15983	100.875	61.1171	5
22.25	88.082	16.0822	7.19218	108.051	68.1133	5		76.284	11.8502	5.29959	90.998	61.57	5
22.33	93.262	11.1581	4.99006	107.117	79.4074	5		79.794	12.4557	5.57037	95.2598	64.3282	5
22.42	88.248	17.4064	7.78438	109.861	66.6351	5		75.01	11.2914	5.04968	89.0302	60.9898	5
22.5	88.338	14.5817	6.52114	106.444	70.2324	5		76.24	10.9568	4.90001	89.8446	62.6354	5
22.58	87.26	12.1225	5.42136	102.312	72.2079	5		80.492	18.8567	8.43298	103.906	57.0783	5
22.67	87.528	15.4079	6.89061	106.659	68.3966	5		77.68	15.2245	6.80859	96.5837	58.7763	5
22.75	90.718	23.2362	10.3916	119.57	61.8664	5		79.502	18.5103	8.27805	102.486	56.5184	5
22.83	91.446	18.7609	8.39011	114.741	68.1513	5		75.518	11.3086	5.05737	89.5595	61.4765	5
22.92	84.078	16.7902	7.50882	104.926	63.2302	5		77.746	13.9461	6.23689	95.0624	60.4296	5
23	89.46	13.2506	5.92587	105.913	73.0072	5		77.87	16.6759	7.4577	98.5759	57.1641	5
23.08	85.004	11.3412	5.07193	99.0859	70.9221	5		86.3	24.2258	10.8341	116.38	56.2196	5
23.17	87.41	10.708	4.78877	100.706	74.1142	5		84.974	24.9177	11.1435	115.913	54.0346	5
23.25	87.106	17.0339	7.6178	108.256	65.9556	5		91.252	20.4308	9.13692	116.62	65.8838	5
23.33	81.584	16.7222	7.47838	102.347	60.8207	5		89.292	24.8786	11.126	120.183	58.4011	5
23.42	82.362	16.1776	7.23483	102.449	62.2749	5		87.324	28.1271	12.5788	122.248	52.3996	5
23.5	82.132	16.624	7.43449	102.773	61.4905	5		87.338	20.0745	8.97757	112.264	62.4123	5
23.58	89.422	24.0477	10.7544	119.281	59.5629	5		89.888	16.9819	7.59455	110.974	68.8021	5
23.67	97.834	15.1382	6.76999	116.631	79.0375	5		81.226	13.2751	5.93679	97.7092	64.7428	5
23.75	92.758	14.9782	6.69843	111.356	74.1602	5		84.752	18.0363	8.06606	107.147	62.357	5
23.83	95.102	22.731	10.1656	123.326	66.8777	5		89.31	25.8758	11.572	121.439	57.181	5
23.92	95.18	12.8865	5.763	111.181	79.1794	5		94.868	28.7206	12.8443	130.529	59.2066	5
24	98.264	20.9633	9.37509	124.293	72.2346	5		94.604	15.6212	6.98602	114	75.2077	5
24.08	95.596	19.6639	8.79398	120.012	71.18	5		94.208	16.5092	7.38316	114.707	73.7091	5
24.17	91.216	19.3138	8.6374	115.197	67.2347	5		84.778	17.4255	7.79291	106.415	63.1414	5
24.25	91.904	20.1016	8.98969	116.863	66.9446	5		86.998	20.4943	9.16532	112.445	61.551	5
24.33	92.004	17.7992	7.96003	114.105	69.9034	5		87.81	21.1089	9.44019	114.02	61.5998	5
24.42	92.098	16.9579	7.58381	113.154	71.042	5		93.048	19.3418	8.64989	117.064	69.032	5
24.5	100.97	14.6641	6.558	119.178	82.7621	5		86.124	15.4928	6.9286	105.361	66.8871	5
24.58	95.042	13.149	5.88039	111.369	78.7154	5		87.492	17.2179	7.70007	108.871	66.1132	5
24.67	94.816	6.30264	2.81863	102.642	86.9902	5		92.86	18.2456	8.15966	115.515	70.2051	5
24.75	90.512	3.48077	1.55665	94.8339	86.1901	5		94.822	22.1969	9.92677	122.383	67.2609	5
24.83	88.208	5.39992	2.41492	94.9129	81.5031	5		97.868	6.40137	2.86278	105.816	89.9197	5
24.92	94.728	10.4464	4.67179	107.699	81.757	5		95.426	11.6197	5.19647	109.854	80.9983	5
25	87.456	12.9579	5.79496	103.545	71.3666	5		92.576	18.0791	8.08523	115.024	70.1278	5
25.08	96.732	15.9995	7.15519	116.598	76.866	5		90.32	18.5285	8.28621	113.326	67.3138	5
25.17	97.716	14.8979	6.66254	116.214	79.2178	5		93.62	11.8052	5.27944	108.278	78.9619	5
25.25	97.81	11.3638	5.08205	111.92	83.7	5		96.634	13.657	6.10761	113.591	79.6766	5
25.33	101.456	14.4018	6.44069	119.338	83.5738	5		97.13	11.1549	4.98861	110.981	83.2794	5
25.42	93.94	13.1435	5.87794	110.26	77.6202	5		90.56	7.27328	3.25271	99.591	81.529	5
25.5	96.442	10.8272	4.84209	109.886	82.9982	5		94.758	11.0179	4.92736	108.439	81.0775	5
25.58	103.936	14.5512	6.50751	122.004	85.8683	5		90.784	7.42352	3.3199	100.002	81.5665	5
25.67	105.782	8.50246	3.80241	116.339	95.2248	5		96.118	14.4059	6.44253	114.005	78.2307	5
25.75	99.504	8.95961	4.00686	110.629	88.3792	5		93.474	8.1698	3.65365	103.618	83.3299	5
25.83	99.008	7.42151	3.319	108.223	89.793	5		100.274	15.5498	6.9541	119.582	80.9663	5
25.92	98.894	7.86723	3.51833	108.662	89.1255	5		96.646	14.962	6.6912	115.224	78.0683	5
26	98.61	8.56968	3.83248	109.251	87.9693	5		92.3	15.0265	6.72006	110.958	73.6421	5
26.08	98.838	10.0175	4.47996	111.276	86.3996	5		94.306	15.3961	6.88535	113.423	75.1892	5
26.17	103.066	12.7682	5.7101	118.92	87.2122	5		91.304	12.7865	5.7183	107.181	75.4274	5
26.25	102.1	13.268	5.93365	118.574	85.6255	5		89.76	15.3702	6.87377	108.845	70.6754	5
26.33	100.852	13.4649	6.02168	117.571	84.1331	5		90.94	9.81709	4.39033	103.13	78.7505	5
26.42	98.018	11.1836	5.00144	111.904	84.1318	5		97.55	11.6365	5.20401	111.999	83.1013	5
26.5	103.67	13.0469	5.83474	119.87	87.4702	5		94.908	15.4484	6.90873	114.09	75.7263	5
26.58	96.046	16.5675	7.40921	116.617	75.4747	5		97.4	14.286	6.38891	115.138	79.6615	5
26.67	98.36	12.6536	5.65888	114.072	82.6484	5		92.72	11.388	5.09286	106.86	78.58	5
26.75	102.18	15.7187	7.0296	121.697	82.6627	5		90.416	11.2626	5.03677	104.4	76.4317	5
26.83	101.716	10.0099	4.47659	114.145	89.287	5		92.932	15.3871	6.88133	112.038	73.8264	5
26.92	99.624	13.287	5.94214	116.122	83.126	5		91.384	17.2938	7.73401	112.857	69.9109	5
27	100.392	10.4761	4.68507	113.4	87.3842	5		87.702	15.0251	6.71942	106.358	69.0459	5
27.08	105.954	18.0063	8.05268	128.312	83.5962	5		90.51	20.5472	9.189	116.023	64.9973	5
27.17	98.472	9.75605	4.36304	110.586	86.3583	5		88.218	13.3931	5.98956	104.848	71.5883	5
27.25	102.988	15.7433	7.04063	122.536	83.4401	5		95.778	16.117	7.20773	115.79	75.7661	5
27.33	100.268	13.7961	6.16981	117.398	83.1379	5		101.026	14.86	6.6456	119.477	82.5749	5
27.42	99.516	18.1998	8.1392	122.114	76.918	5		91.306	14.0149	6.26763	108.708	73.9043	5
27.5	94.702	13.993	6.25786	112.077	77.3274	5		92.3	8.27284	3.69973	102.572	82.0279	5
27.58	93.3	15.5532	6.95562	112.612	73.9881	5		90.898	13.3064	5.95079	107.42	74.376	5
27.67	93.642	16.0191	7.16394	113.532	73.7517	5		95.948	12.5788	5.6254	111.567	80.3294	5
27.75	97.914	18.3158	8.19107	120.656	75.1719	5		100.498	13.6316	6.09624	117.424	83.5721	5
27.83	99.248	8.93088	3.99401	110.337	88.1588	5		95.42	8.6571	3.87157	106.169	84.6708	5
27.92	96.906	8.76268	3.91879	107.786	86.0257	5		91.884	9.54859	4.27026	103.74	80.0279	5
28	100.564	9.53508	4.26422	112.403	88.7246	5		95.234	8.06958	3.60883	105.254	85.2143	5
28.08	102.124	12.7051	5.6819	117.899	86.3485	5		96.672	8.55341	3.8252	107.292	86.0515	5
28.17	92.818	12.401	5.54589	108.216	77.4201	5		95.286	19.4562	8.70108	119.444	71.1279	5
28.25	95.814	6.87749	3.07571	104.354	87.2745	5		90.602	14.4512	6.46277	108.546	72.6585	5
28.33	98.906	9.0664	4.05462	110.163	87.6486	5		91.78	14.6372	6.54596	109.955	73.6055	5
28.42	93.47	11.4804	5.13418	107.725	79.2152	5		95.544	16.1312	7.21409	115.574	75.5145	5
28.5	91.84	8.97065	4.0118	102.979	80.7015	5		94.764	13.1693	5.8895	111.116	78.4121	5
28.58	94.16	7.71274	3.44924	103.737	84.5834	5		95.498	14.3302	6.40864	113.291	77.7048	5
28.67	101.608	11.9233	5.33227	116.413	86.8032	5		92.51	14.8264	6.63058	110.919	74.1006	5
28.75	98.492	15.43	6.90051	117.651	79.3331	5		97.15	10.3849	4.64425	110.045	84.2555	5
28.83	102.562	14.0377	6.27783	119.992	85.1319	5		104.37	18.0522	8.07318	126.785	81.9552	5
28.92	101.594	10.3373	4.623	114.43	88.7585	5		100.35	13.1751	5.89209	116.709	83.9909	5
29	97.846	10.8309	4.84374	111.294	84.3976	5		101.212	16.6312	7.43771	121.862	80.5616	5
29.08	100.694	11.1003	4.96419	114.477	86.9112	5		93.432	4.92094	2.20071	99.5422	87.3218	5
29.17	94.104	14.4701	6.47124	112.071	76.137	5		94.382	4.83668	2.16303	100.388	88.3765	5
29.25	98.12	12.4483	5.56706	113.577	82.6634	5		96.43	8.62022	3.85508	107.133	85.7266	5
29.33	97.566	13.9242	6.22707	114.855	80.2769	5		98.892	6.88844	3.08061	107.445	90.3389	5
29.42	100.658	15.1591	6.77937	119.481	81.8354	5		96.1	4.41542	1.97464	101.582	90.6175	5
29.5	101.004	19.7147	8.81668	125.483	76.525	5		91.268	2.18995	0.979374	93.9872	88.5488	5
29.58	95.72	14.4131	6.44573	113.616	77.8238	5		88.232	2.7513	1.23042	91.6482	84.8158	5
29.67	97.044	16.1063	7.20294	117.043	77.0454	5		93.748	7.66482	3.42781	103.265	84.2309	5
29.75	92.686	13.8098	6.17592	109.833	75.5389	5		90.918	8.05228	3.60109	100.916	80.9198	5
29.83	96.41	17.0691	7.63353	117.604	75.2159	5		96.548	9.02675	4.03689	107.756	85.3398	5
29.92	96.946	11.0819	4.95598	110.706	83.186	5		97.918	13.7047	6.12891	114.935	80.9014	5
30	102.66	8.82012	3.94448	113.612	91.7084	5		90.976	11.639	5.2051	105.428	76.5243	5
30.08	102.734	9.68765	4.33245	114.763	90.7052	5		94.526	10.4179	4.65903	107.462	81.5905	5
30.17	98.012	10.1685	4.5475	110.638	85.3861	5		95.726	10.7358	4.80119	109.056	82.3957	5
30.25	96.672	12.3156	5.50772	111.964	81.3801	5		93.75	9.00173	4.02569	104.927	82.5729	5
30.33	98.706	15.7514	7.04422	118.264	79.1481	5		96.518	8.78631	3.92936	107.428	85.6083	5
30.42	95.69	14.6751	6.56291	113.912	77.4684	5		95.968	11.7295	5.24558	110.532	81.4039	5
30.5	101.674	10.7719	4.81734	115.049	88.2989	5		94.41	7.94285	3.55215	104.272	84.5476	5
30.58	102.206	8.98898	4.02	113.367	91.0447	5		91.242	12.2201	5.46501	106.415	76.0687	5
30.67	105.478	11.0173	4.9271	119.158	91.7982	5		90.73	11.9441	5.34155	105.561	75.8995	5
30.75	102.848	12.8581	5.7503	118.813	86.8826	5		89.23	10.2424	4.58054	101.948	76.5124	5
30.83	97.038	9.15735	4.09529	108.408	85.6676	5		97.388	12.0608	5.39373	112.363	82.4126	5
30.92	99.334	10.2604	4.58861	112.074	86.594	5		94.352	11.6198	5.19653	108.78	79.9241	5
31	102.004	14.0983	6.30494	119.509	84.4987	5		85.822	9.13221	4.08405	97.1611	74.4829	5
31.08	99.75	8.15988	3.64921	109.882	89.6182	5		91.394	5.30318	2.37165	97.9788	84.8092	5
31.17	99.364	6.51345	2.91291	107.452	91.2765	5		92.556	12.3374	5.51744	107.875	77.2371	5
31.25	96.314	2.81813	1.2603	99.8132	92.8148	5		85.294	14.4811	6.47614	103.275	67.3134	5
31.33	93.326	9.35275	4.18268	104.939	81.713	5		84.242	8.84248	3.95448	95.2214	73.2626	5
31.42	90.76	11.7814	5.26881	105.389	76.1314	5		94.332	9.94468	4.4474	106.68	81.984	5
31.5	87.32	8.41904	3.76511	97.7736	76.8664	5		92.17	13.2345	5.91866	108.603	75.7372	5
31.58	92.556	10.7353	4.80097	105.886	79.2264	5		90.054	8.45638	3.78181	100.554	79.554	5
31.67	88.424	11.9318	5.33608	103.239	73.6087	5		88.314	13.4905	6.03315	105.065	71.5633	5
31.75	98.062	13.897	6.21491	115.317	80.8066	5		91.118	9.80415	4.38455	103.291	78.9445	5
31.83	91.35	13.2681	5.93368	107.825	74.8755	5		87.994	9.61938	4.30192	99.938	76.05	5
31.92	96.312	8.6593	3.87256	107.064	85.5601	5		86.998	3.86152	1.72692	91.7927	82.2033	5
32	93.19	14.5256	6.49604	111.226	75.1541	5		93.822	11.6886	5.22728	108.335	79.3087	5
32.08	92.482	13.6679	6.11247	109.453	75.5111	5		94.732	11.5245	5.15392	109.042	80.4224	5
32.17	102.49	8.62355	3.85657	113.198	91.7825	5		94.238	20.6867	9.25138	119.924	68.552	5
32.25	106.624	12.8334	5.73928	122.559	90.6892	5		96.586	11.4034	5.09976	110.745	82.4268	5
32.33	101.536	19.3093	8.63536	125.512	77.5604	5		95.126	6.08777	2.72253	102.685	87.567	5
32.42	100.34	8.55702	3.82682	110.965	89.7151	5		94.076	10.6172	4.74818	107.259	80.8929	5
32.5	97.96	15.8957	7.10876	117.697	78.2229	5		98.334	6.06165	2.71085	105.861	90.8075	5
32.58	102.684	14.9587	6.68974	121.258	84.1103	5		102.854	15.4273	6.8993	122.01	83.6985	5
32.67	104.314	5.0932	2.27775	110.638	97.99	5		98.824	12.836	5.74045	114.762	82.886	5
32.75	97.862	11.2669	5.03872	111.852	83.8723	5		95.286	12.7627	5.70766	111.133	79.439	5
32.83	99.946	13.0026	5.81492	116.091	83.8012	5		93.754	12.8595	5.75092	109.721	77.7869	5
32.92	100.986	9.60486	4.29542	112.912	89.06	5		96.476	11.5337	5.15802	110.797	82.155	5
33	97.162	10.7271	4.79729	110.481	83.8426	5		98.97	14.1212	6.31519	116.504	81.4362	5
33.08	98.924	9.40869	4.2077	110.606	87.2416	5		89.878	14.8758	6.65266	108.349	71.4073	5
33.17	97.654	8.54243	3.82029	108.261	87.0472	5		97.922	6.67008	2.98295	106.204	89.64	5
33.25	101.914	9.9874	4.4665	114.315	89.513	5		98.484	10.1731	4.54955	111.116	85.8524	5
33.33	99.266	11.884	5.31471	114.022	84.51	5		92.452	12.7581	5.70561	108.293	76.6107	5
33.42	100.384	15.3203	6.85145	119.407	81.3613	5		99.952	14.266	6.37997	117.666	82.2384	5
33.5	95.898	17.4868	7.82033	117.611	74.1853	5		91.75	9.77272	4.3705	103.884	79.6156	5
33.58	92.314	10.8155	4.83685	105.743	78.8848	5		87.354	8.10474	3.62455	97.4174	77.2906	5
33.67	89.94	14.9287	6.67633	108.476	71.4035	5		91.088	13.2861	5.94172	107.585	74.5911	5
33.75	93.304	5.18098	2.317	99.737	86.871	5		93.766	11.2985	5.05283	107.795	79.7371	5
33.83	86.972	11.1204	4.97321	100.78	73.1642	5		99.408	11.6065	5.19059	113.819	84.9966	5
33.92	93.754	11.0384	4.93654	107.46	80.048	5		95.384	15.149	6.77485	114.194	76.574	5
34	95.112	15.349	6.8643	114.17	76.0537	5		95.034	13.2537	5.92726	111.491	78.5773	5
34.08	95.43	14.3314	6.4092	113.225	77.6352	5		103.918	15.5666	6.96158	123.246	84.5896	5
34.17	97.58	16.7615	7.49596	118.392	76.7679	5		98.96	13.2758	5.93711	115.444	82.4759	5
34.25	100.874	12.4667	5.57529	116.353	85.3945	5		98.156	12.2889	5.49577	113.415	82.8973	5
34.33	97.574	15.7572	7.04682	117.139	78.0089	5		93.466	15.2144	6.80408	112.357	74.5748	5
34.42	105.604	10.8019	4.83075	119.016	92.1917	5		94.466	16.3441	7.30932	114.76	74.1721	5
34.5	103.446	14.3087	6.39904	121.213	85.6794	5		94.698	10.7734	4.81803	108.075	81.321	5
34.58	107.062	11.2486	5.03051	121.029	93.0951	5		96.822	8.19559	3.66518	106.998	86.6458	5
34.67	102.888	12.3695	5.53181	118.247	87.5292	5		98.304	9.3191	4.16763	109.875	86.7328	5
34.75	103.214	13.7124	6.13238	120.24	86.1878	5		98.144	20.5873	9.20691	123.706	72.5815	5
34.83	103.658	12.6488	5.65671	119.364	87.9525	5		96.034	11.1739	4.99712	109.908	82.1598	5
34.92	100.054	8.09273	3.61918	110.102	90.0056	5		91.492	10.6549	4.76501	104.722	78.2622	5
35	103.73	13.1994	5.90293	120.119	87.3408	5		95.934	14.9291	6.67648	114.471	77.3971	5
35.08	100.722	11.2536	5.03275	114.695	86.7488	5		94.956	15.7649	7.0503	114.531	75.3812	5
35.17	100.866	9.15257	4.09315	112.23	89.5016	5		93.178	17.6994	7.91543	115.155	71.2012	5
35.25	96.162	14.0081	6.26461	113.555	78.7687	5		95.136	17.0106	7.60736	116.257	74.0146	5
35.33	99.724	11.6098	5.19206	114.139	85.3085	5		93.48	12.6164	5.64222	109.145	77.8147	5
35.42	96.416	16.4346	7.34976	116.822	76.0098	5		87.4	15.6083	6.98025	106.78	68.0197	5
35.5	91.736	15.8089	7.06995	111.365	72.1067	5		87.736	14.6251	6.54056	105.896	69.5765	5
35.58	98.998	17.4626	7.80949	120.681	77.3154	5		86.944	14.4829	6.47696	104.927	68.9611	5
35.67	92.738	11.073	4.95201	106.487	78.989	5		89.792	11.5821	5.17969	104.173	75.4109	5
35.75	86.262	7.47489	3.34287	95.5433	76.9807	5		86.98	13.8426	6.1906	104.168	69.7922	5
35.83	84.568	8.05441	3.60204	94.5689	74.5671	5		86.742	18.5627	8.3015	109.791	63.6933	5
35.92	95.726	4.58117	2.04876	101.414	90.0377	5		83.58	10.0952	4.51473	96.1149	71.0451	5
36	90.518	6.59851	2.95094	98.7111	82.3249	5		78.724	5.08445	2.27384	85.0372	72.4108	5
36.08	91.068	11.5116	5.14817	105.362	76.7744	5		82.492	6.48731	2.90121	90.5471	74.4369	5
36.17	91.146	8.6848	3.88396	101.93	80.3624	5		79.076	10.5011	4.69623	92.1148	66.0372	5
36.25	89.852	9.9936	4.46927	102.261	77.4433	5		78.814	6.17861	2.76316	86.4858	71.1422	5
36.33	89.264	9.72391	4.34867	101.338	77.1902	5		78.046	6.78784	3.03561	86.4742	69.6178	5
36.42	85.39	7.72189	3.45334	94.978	75.802	5		83.972	14.7829	6.61113	102.327	65.6166	5
36.5	84.706	11.1158	4.97113	98.5081	70.9039	5		87.214	10.685	4.77847	100.481	73.9468	5
36.58	90.168	16.7201	7.47744	110.929	69.4073	5		86.908	12.1439	5.43092	101.987	71.8293	5
36.67	89.31	10.8502	4.85234	102.782	75.8377	5		92.964	10.801	4.83035	106.375	79.5528	5
36.75	86.114	9.81654	4.39009	98.3028	73.9252	5		83.474	12.479	5.58078	98.9687	67.9793	5
36.83	83.068	10.2508	4.58428	95.796	70.34	5		82.79	6.33966	2.83518	90.6617	74.9183	5
36.92	89.878	13.1012	5.85902	106.145	73.6108	5		86.092	12.0674	5.39669	101.076	71.1084	5
37	88.33	9.74259	4.35702	100.427	76.233	5		88.558	16.4166	7.34171	108.942	68.1741	5
37.08	85.954	12.4745	5.57879	101.443	70.4648	5		92.362	22.3997	10.0175	120.175	64.5491	5
37.17	83.612	12.7506	5.70226	99.444	67.78	5		84.754	11.5353	5.15876	99.077	70.431	5
37.25	84.282	14.2442	6.37022	101.969	66.5954	5		78.906	7.711	3.44846	88.4805	69.3315	5
37.33	82.452	9.32054	4.16827	94.025	70.879	5		79.292	12.2118	5.46129	94.455	64.129	5
37.42	77.302	9.36621	4.1887	88.9317	65.6723	5		83.234	16.5563	7.40421	103.791	62.6766	5
37.5	81.29	12.1927	5.45275	96.4293	66.1507	5		75.704	8.69443	3.88827	86.4996	64.9084	5
37.58	82.702	8.37829	3.74689	93.105	72.299	5		73.768	8.52452	3.81228	84.3526	63.1834	5
37.67	80.822	9.74073	4.35619	92.9167	68.7273	5		77.232	10.3243	4.61717	90.0513	64.4127	5
37.75	80.29	9.69095	4.33392	92.3229	68.2571	5		82.86	9.598	4.29236	94.7775	70.9425	5
37.83	83.014	13.7413	6.14529	100.076	65.9519	5		81.788	10.3108	4.61114	94.5906	68.9854	5
37.92	79.556	11.9577	5.34764	94.4034	64.7086	5		83.342	10.731	4.79906	96.6663	70.0177	5
38	84.662	18.4929	8.27029	107.624	61.7	5		78.862	10.4058	4.65362	91.7825	65.9415	5
38.08	85.084	9.38705	4.19802	96.7396	73.4284	5		82.048	14.6746	6.56266	100.269	63.8271	5
38.17	83.436	9.97972	4.46306	95.8275	71.0445	5		81.226	13.7425	6.14583	98.2896	64.1624	5
38.25	82.92	9.26788	4.14472	94.4276	71.4124	5		80.24	7.79564	3.48632	89.9196	70.5604	5
38.33	81.958	8.89246	3.97683	92.9995	70.9165	5		82.5	14.7994	6.6185	100.876	64.1241	5
38.42	81.008	11.6397	5.20542	95.4606	66.5554	5		81.872	14.7564	6.59925	100.194	63.5495	5
38.5	83.472	12.6278	5.64731	99.1514	67.7926	5		76.736	11.6727	5.2202	91.2296	62.2424	5
38.58	78.64	12.8501	5.74676	94.5956	62.6844	5		75.384	13.5842	6.07504	92.251	58.517	5
38.67	81.366	15.8704	7.09745	101.072	61.6603	5		79.26	10.3253	4.61761	92.0805	66.4395	5
38.75	82.494	18.6406	8.33634	105.639	59.3486	5		79.394	11.0619	4.94704	93.1292	65.6588	5
38.83	82.61	20.1571	9.01453	107.638	57.5817	5		82.588	6.29648	2.81587	90.4061	74.7699	5
38.92	86.246	22.5206	10.0715	114.209	58.283	5		79.124	8.17711	3.65691	89.2772	68.9708	5
39	82.986	12.6572	5.66045	98.7019	67.2701	5		75.234	8.49768	3.80028	85.7853	64.6827	5
39.08	79.854	10.3803	4.64219	92.7428	66.9652	5		74.012	5.41022	2.41952	80.7297	67.2943	5
39.17	77.03	13.0644	5.84259	93.2516	60.8084	5		79.12	9.1407	4.08784	90.4697	67.7703	5
39.25	83.058	7.7239	3.45423	92.6485	73.4675	5		76.156	10.7728	4.81774	89.5322	62.7798	5
39.33	78.29	12.4048	5.54759	93.6926	62.8874	5		81.102	16.1371	7.21672	101.139	61.0652	5
39.42	78.882	7.92707	3.54509	88.7248	69.0392	5		89.986	17.0424	7.62159	111.147	68.8251	5
39.5	78.594	11.158	4.99	92.4485	64.7395	5		83.794	18.5369	8.28997	106.811	60.7774	5
39.58	77.544	11.9286	5.33463	92.3553	62.7327	5		86.124	17.0209	7.612	107.258	64.9897	5
39.67	77.72	10.4505	4.67359	90.696	64.744	5		89.316	28.922	12.9343	125.227	53.4046	5
39.75	82.804	10.1547	4.54131	95.4127	70.1953	5		81.406	11.8613	5.30455	96.1338	66.6782	5
39.83	83.376	9.95224	4.45078	95.7333	71.0187	5		77.432	16.2879	7.28416	97.6561	57.2079	5
39.92	82.112	6.93381	3.1009	90.7215	73.5025	5		88.672	30.239	13.5233	126.219	51.1254	5
40	79.236	6.05512	2.70793	86.7544	71.7176	5		78.656	17.1551	7.67198	99.9568	57.3552	5
40.08	87.62	13.6378	6.09901	104.554	70.6864	5		73.846	18.0212	8.05932	96.2223	51.4697	5
40.17	86.278	21.9002	9.79407	113.471	59.0853	5		77.44	15.738	7.03824	96.9813	57.8987	5
40.25	82.99	19.8297	8.86813	107.612	58.3681	5		76.134	13.3151	5.95467	92.6668	59.6012	5
40.33	84.292	20.1758	9.02288	109.344	59.2405	5		81.47	5.22534	2.33684	87.9581	74.9819	5
40.42	77.97	12.4459	5.56599	93.4237	62.5163	5		78.364	12.8903	5.76472	94.3694	62.3586	5
40.5	79.19	13.3416	5.96654	95.7558	62.6242	5		81.08	13.6348	6.09767	98.0099	64.1501	5
40.58	82.884	15.1808	6.78908	101.734	64.0345	5		73.06	14.9919	6.70459	91.6749	54.4451	5
40.67	80.236	8.08879	3.61742	90.2796	70.1924	5		75.256	9.44482	4.22385	86.9833	63.5287	5
40.75	82.812	11.5644	5.17174	97.1711	68.4529	5		72.846	8.29482	3.70956	83.1454	62.5466	5
40.83	81.87	9.4696	4.23493	93.6281	70.1119	5		68.016	8.17843	3.65751	78.1709	57.8611	5
40.92	80.124	11.1775	4.99874	94.0027	66.2453	5		71.538	9.66311	4.32148	83.5363	59.5397	5
41	82.438	12.6563	5.66009	98.1529	66.7231	5		71.068	9.35705	4.1846	82.6863	59.4497	5
41.08	83.274	16.9446	7.57785	104.313	62.2345	5		68.682	8.16408	3.65109	78.819	58.545	5
41.17	86.41	14.2708	6.38208	104.129	68.6905	5		74.326	8.35906	3.73829	84.7051	63.9469	5
41.25	87.076	11.2285	5.02152	101.018	73.134	5		75.322	20.0125	8.94988	100.171	50.4731	5
41.33	87.284	10.6107	4.74526	100.459	74.109	5		80.71	20.6971	9.25602	106.409	55.0112	5
41.42	82.468	12.9393	5.78661	98.5342	66.4018	5		79.87	17.1868	7.68619	101.21	58.5297	5
41.5	80.874	13.0912	5.85456	97.1289	64.6191	5		76.538	13.6355	6.09798	93.4687	59.6073	5
41.58	75.946	10.4745	4.68435	88.9518	62.9402	5		71.836	9.3009	4.15949	83.3846	60.2874	5
41.67	79.134	12.4718	5.57756	94.6198	63.6482	5		76.024	11.6092	5.19179	90.4387	61.6093	5
41.75	74.59	12.6988	5.67909	90.3577	58.8223	5		77.3	16.1023	7.20119	97.2937	57.3063	5
41.83	74.156	10.5131	4.7016	87.2097	61.1023	5		77.15	12.2763	5.49012	92.393	61.907	5
41.92	75.96	11.7437	5.25193	90.5417	61.3783	5		86.468	16.8909	7.55386	107.441	65.4951	5
42	72.46	9.90709	4.43058	84.7613	60.1587	5		84.052	22.3209	9.9822	111.767	56.337	5
42.08	73.422	10.5989	4.73996	86.5822	60.2618	5		86.858	13.6343	6.09743	103.787	69.9288	5
42.17	76.406	15.7241	7.03205	95.9301	56.8819	5		89.626	15.6121	6.98194	109.011	70.241	5
42.25	82.49	18.3345	8.19946	105.255	59.7247	5		87.818	17.6717	7.90301	109.76	65.8757	5
42.33	83.022	17.8126	7.96604	105.139	60.9047	5		79.298	14.6342	6.54463	97.4688	61.1272	5
42.42	75.688	13.0623	5.84164	91.907	59.469	5		77.878	10.1129	4.52261	90.4348	65.3212	5
42.5	82.856	9.33948	4.17674	94.4525	71.2595	5		74.76	13.5734	6.07022	91.6136	57.9064	5
42.58	78.476	9.21884	4.12279	89.9227	67.0293	5		70.26	9.00393	4.02668	81.4399	59.0801	5
42.67	84.402	5.25684	2.35093	90.9292	77.8748	5		74.894	13.1035	5.86006	91.1641	58.6239	5
42.75	84.542	13.3714	5.97985	101.145	67.9393	5		78.276	19.1455	8.56211	102.048	54.5038	5
42.83	87.358	14.8748	6.65223	105.828	68.8884	5		74.962	15.991	7.15139	94.8174	55.1066	5
42.92	85.284	14.419	6.44836	103.188	67.3805	5		72.282	11.9837	5.35927	87.1617	57.4023	5
43	81.646	17.9124	8.01067	103.887	59.4048	5		75.816	13.7796	6.16245	92.9257	58.7063	5
43.08	90.162	19.4437	8.69549	114.305	66.0194	5		71.784	11.2062	5.01157	85.6984	57.8696	5
43.17	83.728	18.1186	8.1029	106.225	61.2307	5		75.602	14.573	6.51723	93.6967	57.5073	5
43.25	80.644	17.3375	7.75358	102.171	59.1166	5		74.94	11.5659	5.17243	89.301	60.579	5
43.33	85.84	18.0177	8.05775	108.212	63.4681	5		74.21	14.0101	6.2655	91.6058	56.8142	5
43.42	88.12	15.2628	6.82573	107.071	69.1687	5		75.152	12.9995	5.81354	91.293	59.011	5
43.5	86.91	12.836	5.74042	102.848	70.972	5		70.292	13.1422	5.87739	86.6102	53.9738	5
43.58	83.154	14.7251	6.58527	101.438	64.8704	5		72.582	11.5811	5.17924	86.9619	58.2021	5
43.67	75.452	11.2923	5.05008	89.4733	61.4307	5		75.072	12.5989	5.6344	90.7156	59.4284	5
43.75	75.022	11.7941	5.27447	89.6663	60.3777	5		78.176	11.0827	4.95635	91.937	64.415	5
43.83	75.632	8.77556	3.92455	86.5283	64.7357	5		84.58	14.9175	6.67131	103.103	66.0575	5
43.92	77.848	12.3848	5.53865	93.2258	62.4702	5		79.948	14.2856	6.38874	97.686	62.21	5
44	83.258	7.72103	3.45295	92.8449	73.6711	5		85.83	21.817	9.75685	112.919	58.7406	5
44.08	85.12	13.187	5.8974	101.494	68.7462	5		85.236	28.5039	12.7473	120.628	49.8437	5
44.17	77.328	11.5111	5.14791	91.6209	63.0351	5		85.774	29.4218	13.1578	122.306	49.242	5
44.25	75.646	11.7975	5.27602	90.2946	60.9974	5		83.382	30.6352	13.7005	121.421	45.3433	5
44.33	82.97	13.9414	6.2348	100.281	65.6594	5		83.966	29.6516	13.2606	120.783	47.1487	5
44.42	86.506	5.59448	2.50193	93.4525	79.5595	5		73.662	17.3597	7.76347	95.2169	52.1071	5
44.5	82.228	9.9308	4.44119	94.5587	69.8973	5		75.486	14.783	6.61117	93.8415	57.1305	5
44.58	81.774	10.5295	4.70894	94.8481	68.6999	5		77.446	16.2729	7.27745	97.6515	57.2405	5
44.67	77.432	10.5234	4.70622	90.4986	64.3654	5		73.686	12.0542	5.39079	88.6532	58.7188	5
44.75	74.954	7.47418	3.34256	84.2344	65.6736	5		72.5	15.1754	6.78666	91.3428	53.6572	5
44.83	80.894	18.6599	8.34497	104.063	57.7247	5		74.26	6.9846	3.12361	82.9325	65.5875	5
44.92	84.102	19.7103	8.8147	108.576	59.6285	5		78.376	9.31533	4.16594	89.9425	66.8095	5
45	84.608	14.6256	6.54079	102.768	66.4479	5		77.864	11.0912	4.96012	91.6355	64.0925	5
45.08	87.232	19.3374	8.64797	111.243	63.2214	5		82.01	17.2373	7.70874	103.413	60.6071	5
45.17	87.644	20.6607	9.23974	113.298	61.9904	5		83.114	13.7612	6.15419	100.201	66.0272	5
45.25	89.024	13.8799	6.20729	106.258	71.7898	5		81.24	13.5392	6.05493	98.0512	64.4288	5
45.33	84.194	8.68996	3.88627	94.984	73.404	5		80.954	12.6493	5.65692	96.6601	65.2479	5
45.42	80.836	12.4309	5.55926	96.271	65.401	5		78.756	11.7775	5.26704	93.3796	64.1324	5
45.5	78.73	9.51149	4.25367	90.5401	66.9199	5		81.234	15.8146	7.07252	100.87	61.5975	5
45.58	78.978	15.4625	6.91504	98.1772	59.7788	5		74.124	11.55	5.16531	88.4652	59.7828	5
45.67	78.308	13.0585	5.83992	94.5222	62.0938	5		73.572	9.36136	4.18653	85.1957	61.9483	5
45.75	74.424	14.4464	6.46062	92.3616	56.4864	5		80.394	9.7159	4.34508	92.4579	68.3301	5
45.83	78.502	17.7258	7.92724	100.512	56.4925	5		75.806	9.86501	4.41177	88.055	63.557	5
45.92	81.436	17.1395	7.66504	102.718	60.1544	5		79.952	8.38757	3.75104	90.3665	69.5375	5
46	89.686	25.4222	11.3692	121.252	58.1201	5		77.618	4.00665	1.79183	82.5929	72.6431	5
46.08	88.258	16.1492	7.22212	108.31	68.2062	5		81.936	15.0045	6.71024	100.567	63.3054	5
46.17	89.816	17.4447	7.80149	111.476	68.1556	5		78.682	13.8757	6.2054	95.911	61.453	5
46.25	86.656	9.13958	4.08734	98.0043	75.3077	5		77.858	22.8469	10.2174	106.226	49.4899	5
46.33	87.362	8.5603	3.82828	97.991	76.733	5		77.762	15.7225	7.03133	97.2841	58.2399	5
46.42	85.362	8.63555	3.86193	96.0844	74.6396	5		74.402	11.3263	5.06525	88.4654	60.3386	5
46.5	84.908	10.1059	4.5195	97.4561	72.3599	5		72.414	9.7962	4.38099	84.5776	60.2504	5
46.58	78.262	10.7079	4.78874	91.5577	64.9663	5		72.976	13.8863	6.21012	90.2181	55.7339	5
46.67	83.966	20.9974	9.39034	110.038	57.8942	5		84.22	18.1548	8.11908	106.762	61.6778	5
46.75	84.24	19.4241	8.68672	108.358	60.1218	5		81.598	18.3469	8.20497	104.379	58.8174	5
46.83	84.868	20.9864	9.38539	110.926	58.81	5		84.104	23.9454	10.7087	113.836	54.3719	5
46.92	86.698	18.0182	8.05798	109.071	64.3255	5		88.18	11.2178	5.01675	102.109	74.2513	5
47	79.328	17.4216	7.79119	100.96	57.6962	5		80.726	16.9633	7.58621	101.789	59.6633	5
47.08	81.082	13.5992	6.08173	97.9676	64.1964	5		75.624	14.9865	6.70215	94.2321	57.0159	5
47.17	85.996	19.7191	8.81864	110.48	61.5115	5		82.68	22.7179	10.1598	110.888	54.472	5
47.25	87.012	20.8321	9.31639	112.878	61.1456	5		88.024	24.1796	10.8134	118.047	58.0011	5
47.33	86.962	21.1795	9.47176	113.26	60.6642	5		83.504	18.5228	8.28364	106.503	60.5049	5
47.42	89.92	15.7728	7.05381	109.505	70.3355	5		80.704	19.254	8.61063	104.611	56.797	5
47.5	87.182	20.8444	9.32192	113.064	61.3002	5		81.666	21.1006	9.43647	107.866	55.4662	5
47.58	85.078	17.5911	7.86699	106.92	63.2357	5		85.978	23.0649	10.3149	114.617	57.3392	5
47.67	83.12	20.2779	9.06855	108.298	57.9417	5		93.602	25.3359	11.3306	125.061	62.1433	5
47.75	89.936	19.0146	8.50361	113.546	66.3262	5		86.372	26.4166	11.8139	119.173	53.5715	5
47.83	95.01	12.8175	5.73218	110.925	79.0949	5		100.522	32.3899	14.4852	140.739	60.3046	5
47.92	94.358	17.9153	8.01198	116.603	72.1132	5		86.366	17.7602	7.94262	108.418	64.3138	5

## Sheet: Figure 9C
			Baseline							+ Tamoxifen						MAP day	Control	Stim1 smKO		MAP night	Control	Stim1 smKO
Time (h)	Mean	SD	SEM	Upper limit	Lower limit	N		Mean	SD	SEM	Upper limit	Lower limit	N			Mouse 1	103.255	96.941		Mouse 1	116.784	109.649
0	116.132	16.8427	7.53227	137.045	95.2191	5		101.384	17.2635	7.72047	122.819	79.9485	5			Mouse 2	111.287	98.0102		Mouse 2	122.303	110.721
0.08	112.72	9.79461	4.38028	124.882	100.558	5		97.172	13.4193	6.0013	113.834	80.5097	5			Mouse 3	91.7841	91.0203		Mouse 3	104.928	103.739
0.17	115.448	13.8252	6.18281	132.614	98.2818	5		102.106	10.5632	4.724	115.222	88.9901	5			Mouse 4	86.9754	82.2472		Mouse 4	104.849	97.7626
0.25	115.584	16.3475	7.31081	135.882	95.2859	5		94.458	10.6183	4.74865	107.642	81.2736	5			Mouse 5	94.5477	74.8464		Mouse 5	109.392	90.3172
0.33	109.582	8.26185	3.69481	119.84	99.3236	5		102.318	15.7646	7.05016	121.892	82.7436	5
0.42	112.244	18.6372	8.3348	135.385	89.1029	5		98.496	14.4643	6.46863	116.456	80.5362	5		Paired t test				Paired t test
0.5	105.832	14.3592	6.42163	123.661	88.0027	5		100.892	17.4137	7.78765	122.514	79.27	5		P value	0.0562			P value	0.036
0.58	107.782	14.1676	6.33594	125.373	90.1906	5		100.566	21.6092	9.66393	127.397	73.7346	5		Significantly different (P < 0.05)?	No			Significantly different (P < 0.05)?	Yes
0.67	108.762	13.385	5.98593	125.382	92.1424	5		95.314	16.9502	7.58036	116.36	74.2675	5		One- or two-tailed P value?	Two-tailed			One- or two-tailed P value?	Two-tailed
0.75	113.74	9.79215	4.37918	125.899	101.581	5		97.37	24.6689	11.0323	128.001	66.7395	5
0.83	108.516	19.4232	8.68631	132.633	84.3989	5		90.432	17.0968	7.64593	111.661	69.2035	5		Mean of differences (B - A)	-8.957			Mean of differences (B - A)	-9.213
0.92	105.742	17.2458	7.71257	127.156	84.3285	5		94.634	15.6235	6.98706	114.033	75.2348	5		SD of differences	7.518			SD of differences	6.635
1	108.896	19.6665	8.79514	133.315	84.4768	5		99.226	17.2489	7.71394	120.643	77.8087	5		SEM of differences	3.362			SEM of differences	2.967
1.08	105.052	13.4967	6.0359	121.81	88.2936	5		103.014	8.84694	3.95647	113.999	92.0291	5		95% confidence interval	-18.29 to 0.3782			95% confidence interval	-17.45 to -0.9751
1.17	113.096	8.55243	3.82476	123.715	102.477	5		102.966	12.2775	5.49066	118.211	87.7215	5
1.25	111.842	8.93378	3.99531	122.935	100.749	5		104.134	10.099	4.5164	116.674	91.5945	5
1.33	114.684	12.5044	5.59214	130.21	99.1577	5		100.378	11.2928	5.05029	114.4	86.3561	5
1.42	117.814	9.27483	4.14783	129.33	106.298	5		99.76	11.5955	5.18566	114.158	85.3623	5
1.5	116.954	9.58133	4.2849	128.851	105.057	5		98.922	5.42944	2.42812	105.664	92.1805	5
1.58	110.864	17.5449	7.8463	132.649	89.0792	5		106.098	4.27681	1.91265	111.408	100.788	5
1.67	118.852	20.2207	9.04296	143.959	93.7447	5		100.458	10.709	4.78919	113.755	87.1611	5
1.75	116.788	11.7141	5.23872	131.333	102.243	5		102.378	12.1967	5.45455	117.522	87.2337	5
1.83	111.09	5.29453	2.36779	117.664	104.516	5		108.252	6.74973	3.01857	116.633	99.8711	5
1.92	105.196	13.7519	6.15005	122.271	88.1207	5		100.116	6.91186	3.09108	108.698	91.5338	5
2	106.618	10.0844	4.50988	119.139	94.0966	5		101.714	10.3053	4.60866	114.51	88.9183	5
2.08	110.98	13.1464	5.87923	127.303	94.6566	5		100.84	6.7271	3.00845	109.193	92.4872	5
2.17	107.468	9.49604	4.24676	119.259	95.6771	5		106.002	9.47488	4.23729	117.767	94.2374	5
2.25	106.6	7.68761	3.438	116.145	97.0546	5		103.452	5.68052	2.5404	110.505	96.3987	5
2.33	108.012	2.54522	1.13826	111.172	104.852	5		101.672	8.71002	3.89524	112.487	90.8571	5
2.42	112.262	15.1055	6.75538	131.018	93.5061	5		99.1	8.14063	3.6406	109.208	88.9921	5
2.5	112.464	9.02468	4.03596	123.67	101.258	5		105.568	12.9941	5.81113	121.702	89.4337	5
2.58	108.26	12.2858	5.49437	123.515	93.0052	5		102.448	12.3038	5.50245	117.725	87.1708	5
2.67	110.87	12.3723	5.53305	126.232	95.5078	5		97.51	13.152	5.88174	113.84	81.1797	5
2.75	116.142	12.5825	5.62706	131.765	100.519	5		90.944	10.8768	4.86423	104.449	77.4387	5
2.83	115.288	11.2209	5.01815	129.221	101.355	5		97.824	4.93008	2.2048	103.946	91.7025	5
2.92	109.89	14.046	6.28156	127.33	92.4496	5		100.902	8.4501	3.779	111.394	90.4098	5
3	113.91	12.7818	5.71618	129.781	98.0393	5		94.602	8.12751	3.63473	104.694	84.5104	5
3.08	113.604	10.6496	4.76266	126.827	100.381	5		92.226	8.09359	3.61956	102.276	82.1765	5
3.17	112.43	16.4455	7.35465	132.85	92.0102	5		97.912	16.5287	7.39185	118.435	77.3889	5
3.25	116.08	11.8	5.27711	130.732	101.428	5		99.988	13.0374	5.8305	116.176	83.7999	5
3.33	115.604	6.10821	2.73167	123.188	108.02	5		105.554	17.9826	8.04208	127.882	83.2256	5
3.42	113.162	6.49451	2.90444	121.226	105.098	5		97.56	18.4702	8.26013	120.494	74.6262	5
3.5	113.706	10.9648	4.90359	127.321	100.091	5		99.016	22.7377	10.1686	127.249	70.7834	5
3.58	119.848	9.53724	4.26518	131.69	108.006	5		99.344	23.5674	10.5397	128.607	70.0812	5
3.67	123.788	16.7544	7.4928	144.591	102.985	5		94.996	21.3072	9.52886	121.452	68.5396	5
3.75	108.886	6.7605	3.02339	117.28	100.492	5		95.448	16.3131	7.29543	115.703	75.1926	5
3.83	111.41	10.3837	4.64371	124.303	98.517	5		93.714	16.7613	7.49587	114.526	72.9021	5
3.92	107.732	5.70003	2.54913	114.81	100.654	5		97.56	18.6267	8.33012	120.688	74.4319	5
4	110.298	8.62513	3.85727	121.008	99.5885	5		101.146	17.179	7.68268	122.477	79.8154	5
4.08	111.504	14.0057	6.26353	128.894	94.1137	5		102.882	12.4945	5.58769	118.396	87.3681	5
4.17	109.046	15.0871	6.74716	127.779	90.3129	5		99.208	13.9705	6.24779	116.555	81.8614	5
4.25	112.17	11.7451	5.25258	126.753	97.5865	5		95.272	17.1068	7.6504	116.513	74.0311	5
4.33	114.704	11.4274	5.11048	128.893	100.515	5		101.816	15.8374	7.0827	121.481	82.1513	5
4.42	117.508	8.5219	3.81111	128.089	106.927	5		104.296	12.2628	5.48409	119.522	89.0697	5
4.5	118.38	7.38791	3.30397	127.553	109.207	5		103.58	7.69492	3.44127	113.135	94.0255	5
4.58	122.004	9.77974	4.37363	134.147	109.861	5		105.758	3.2737	1.46404	109.823	101.693	5
4.67	115.896	9.6897	4.33337	127.927	103.865	5		107.614	8.589	3.84112	118.279	96.9493	5
4.75	113.78	13.5688	6.06813	130.628	96.9322	5		108.056	10.4784	4.6861	121.067	95.0453	5
4.83	115.88	15.2211	6.8071	134.78	96.9805	5		101.018	6.22706	2.78483	108.75	93.2861	5
4.92	114.796	7.46092	3.33662	124.06	105.532	5		101.62	5.26323	2.35379	108.155	95.0848	5
5	113.048	6.62026	2.96067	121.268	104.828	5		101.37	9.98853	4.46701	113.772	88.9676	5
5.08	111.02	13.725	6.13802	128.062	93.9781	5		106.702	8.39876	3.75604	117.13	96.2736	5
5.17	110.31	11.0844	4.95711	124.073	96.5468	5		107.228	5.90021	2.63866	114.554	99.9019	5
5.25	110.286	8.07812	3.61264	120.316	100.256	5		102.844	5.74765	2.57043	109.981	95.7073	5
5.33	106.596	11.0117	4.92457	120.269	92.9232	5		107.31	9.13703	4.0862	118.655	95.9649	5
5.42	107.384	16.4516	7.35739	127.811	86.9566	5		107.462	8.98463	4.01805	118.618	96.3061	5
5.5	108.028	11.5971	5.18639	122.428	93.6283	5		107.434	6.32082	2.82676	115.282	99.5857	5
5.58	107.576	13.7733	6.1596	124.678	90.4742	5		104.964	11.5659	5.17244	119.325	90.603	5
5.67	107.202	9.87409	4.41583	119.462	94.9417	5		97.016	16.7058	7.47106	117.759	76.273	5
5.75	111.078	10.6172	4.74814	124.261	97.8951	5		98.814	21.0225	9.40153	124.917	72.7112	5
5.83	112.004	5.43626	2.43117	118.754	105.254	5		98.316	15.7506	7.0439	117.873	78.759	5
5.92	115.934	15.1898	6.79308	134.795	97.0734	5		94.038	6.48789	2.90147	102.094	85.9822	5
6	117.972	7.0828	3.16752	126.766	109.178	5		97.692	12.3116	5.50594	112.979	82.4051	5
6.08	116.654	8.38276	3.74888	127.063	106.245	5		94.314	10.6251	4.75168	107.507	81.1212	5
6.17	115.18	15.0519	6.73142	133.869	96.4906	5		99.146	9.40822	4.20748	110.828	87.4642	5
6.25	115.506	10.6883	4.77993	128.777	102.235	5		94.542	14.5004	6.48477	112.547	76.5374	5
6.33	120.26	10.9328	4.88929	133.835	106.685	5		93.794	17.6303	7.88451	115.685	71.9031	5
6.42	112.802	5.09904	2.28036	119.133	106.471	5		92.748	10.1015	4.51751	105.291	80.2054	5
6.5	115.624	7.39616	3.30766	124.808	106.44	5		99.104	9.84987	4.405	111.334	86.8738	5
6.58	115.308	18.1465	8.11538	137.84	92.7761	5		102.392	11.4936	5.1401	116.663	88.1208	5
6.67	112.386	11.4863	5.13685	126.648	98.1238	5		106.484	16.2951	7.28739	126.717	86.251	5
6.75	115.1	14.3549	6.41969	132.924	97.2761	5		103.974	6.11216	2.73344	111.563	96.3848	5
6.83	114.12	12.8421	5.74316	130.066	98.1744	5		102.34	14.427	6.45197	120.254	84.4265	5
6.92	109.06	7.778	3.47843	118.718	99.4023	5		103.786	12.9837	5.8065	119.907	87.6646	5
7	106.658	15.3206	6.85159	125.681	87.6349	5		96.946	10.8829	4.86696	110.459	83.4331	5
7.08	104.798	12.5599	5.61694	120.393	89.2029	5		102.092	19.5746	8.75401	126.397	77.787	5
7.17	108.176	5.86911	2.62475	115.463	100.889	5		101.364	6.47061	2.89374	109.398	93.3297	5
7.25	106.99	11.1541	4.98828	120.84	93.1403	5		100.816	15.2556	6.82253	119.758	81.8736	5
7.33	105.096	12.8435	5.74377	121.043	89.1487	5		100.36	7.40823	3.31306	109.559	91.1615	5
7.42	104.442	13.7461	6.14745	121.51	87.3739	5		104.682	7.6292	3.41188	114.155	95.2091	5
7.5	104.618	12.4564	5.57067	120.085	89.1513	5		100.168	3.59313	1.6069	104.629	95.7065	5
7.58	105.35	11.5739	5.17599	119.721	90.9791	5		100.506	6.02261	2.69339	107.984	93.0279	5
7.67	104.128	10.8087	4.83379	117.549	90.7073	5		101.312	11.5326	5.15756	115.632	86.9923	5
7.75	101.364	16.1704	7.23164	121.442	81.2858	5		103.78	16.4187	7.34265	124.166	83.3935	5
7.83	105.552	14.6608	6.55653	123.756	87.3482	5		102.546	13.9308	6.23002	119.843	85.2487	5
7.92	103.614	14.502	6.48551	121.621	85.6073	5		108.052	9.46908	4.2347	119.809	96.2946	5
8	104.616	9.97355	4.46031	117	92.2322	5		101.006	10.5589	4.72206	114.117	87.8954	5
8.08	110.17	16.7121	7.47389	130.921	89.4192	5		100.982	11.0631	4.94757	114.719	87.2454	5
8.17	104.538	11.0779	4.95417	118.293	90.783	5		100.484	15.3605	6.86944	119.557	81.4114	5
8.25	99.046	13.7241	6.13759	116.087	82.0053	5		102.472	20.5513	9.19082	127.99	76.9542	5
8.33	110.316	15.1923	6.79419	129.18	91.4523	5		96.858	20.9408	9.365	122.859	70.8566	5
8.42	106.68	10.9349	4.89026	120.258	93.1025	5		93.896	22.3012	9.97338	121.587	66.2055	5
8.5	114.416	10.5813	4.7321	127.554	101.278	5		91.87	18.6056	8.32069	114.972	68.7681	5
8.58	112.904	11.8355	5.293	127.6	98.2083	5		94.618	16.495	7.37677	115.099	74.1368	5
8.67	112.586	14.3089	6.39915	130.353	94.8191	5		97.556	22.7398	10.1695	125.791	69.3208	5
8.75	115.774	9.44674	4.22471	127.504	104.044	5		99.016	18.1473	8.11571	121.549	76.4832	5
8.83	116.308	7.84032	3.5063	126.043	106.573	5		102.434	14.9241	6.67427	120.965	83.9033	5
8.92	108.87	9.18723	4.10865	120.277	97.4626	5		103.696	14.6192	6.53789	121.848	85.5439	5
9	111.292	7.22449	3.23089	120.262	102.322	5		105.984	12.1471	5.43233	121.067	90.9014	5
9.08	116.568	6.25386	2.79681	124.333	108.803	5		104.726	6.04621	2.70395	112.233	97.2186	5
9.17	116.62	17.9406	8.02328	138.896	94.3438	5		96.478	8.76067	3.91789	107.356	85.6002	5
9.25	117.458	13.1039	5.86023	133.729	101.187	5		99.946	11.2006	5.00906	113.853	86.0386	5
9.33	114.018	9.77044	4.36947	126.15	101.886	5		105.172	13.7324	6.14131	122.223	88.121	5
9.42	116.108	10.0319	4.4864	128.564	103.652	5		110.182	10.3652	4.63545	123.052	97.3119	5
9.5	108.502	9.06402	4.05355	119.756	97.2475	5		99.936	5.86705	2.62382	107.221	92.6511	5
9.58	110.546	9.36058	4.18618	122.169	98.9233	5		110.472	9.82627	4.39444	122.673	98.2711	5
9.67	110.882	4.03904	1.80632	115.897	105.867	5		106.826	9.26825	4.14489	118.334	95.3179	5
9.75	115.382	9.99339	4.46918	127.79	102.974	5		110.778	10.2477	4.58292	123.502	98.0538	5
9.83	107.262	6.88707	3.07999	115.813	98.7106	5		105.258	10.1323	4.53131	117.839	92.6771	5
9.92	108.64	15.8145	7.07247	128.276	89.0037	5		102.49	17.5048	7.8284	124.225	80.7549	5
10	105.87	12.0106	5.37129	120.783	90.9569	5		104.668	14.3953	6.43776	122.542	86.7939	5
10.08	109.868	14.9262	6.6752	128.401	91.3347	5		100.88	22.0856	9.87698	128.303	73.4571	5
10.17	108.64	16.7737	7.50144	129.467	87.8127	5		98.886	17.8513	7.98333	121.051	76.7207	5
10.25	109.364	10.4375	4.66778	122.324	96.4042	5		95.42	20.984	9.38434	121.475	69.3649	5
10.33	115.404	10.7181	4.79328	128.712	102.096	5		103.06	17.376	7.77077	124.635	81.4849	5
10.42	116.334	3.35959	1.50245	120.505	112.163	5		104.906	15.7634	7.04959	124.479	85.3332	5
10.5	114.714	10.9225	4.88471	128.276	101.152	5		104.21	12.8642	5.75306	120.183	88.2369	5
10.58	119.278	12.2906	5.49652	134.539	104.017	5		106.586	15.1917	6.79395	125.449	87.723	5
10.67	117.086	8.91317	3.98609	128.153	106.019	5		107.194	9.80636	4.38554	119.37	95.0178	5
10.75	118.618	9.4738	4.23681	130.381	106.855	5		103.254	8.22712	3.67928	113.469	93.0387	5
10.83	118.254	14.1531	6.32947	135.827	100.681	5		106.742	10.6983	4.78443	120.026	93.4583	5
10.92	114.352	17.1037	7.649	135.589	93.115	5		108.098	4.82901	2.1596	114.094	102.102	5
11	112.534	12.0452	5.38676	127.49	97.578	5		109.076	7.71802	3.4516	118.659	99.4928	5
11.08	110.978	16.3109	7.29445	131.231	90.7253	5		113.12	11.345	5.07363	127.207	99.0333	5
11.17	108.584	16.2707	7.2765	128.787	88.3812	5		104.99	12.225	5.46718	120.169	89.8107	5
11.25	112.364	8.59895	3.84557	123.041	101.687	5		104.202	17.0806	7.63866	125.41	82.9937	5
11.33	113.25	8.90285	3.98147	124.304	102.196	5		105.56	18.8686	8.43828	128.988	82.1316	5
11.42	115.472	1.8543	0.829267	117.774	113.17	5		104.098	12.452	5.56868	119.559	88.6369	5
11.5	109.096	4.48937	2.00771	114.67	103.522	5		100.688	16.6899	7.46393	121.411	79.9648	5
11.58	104.02	2.03357	0.909439	106.545	101.495	5		96.482	12.8324	5.73884	112.416	80.5484	5
11.67	104.656	6.95463	3.11021	113.291	96.0207	5		97.65	9.13801	4.08664	108.996	86.3037	5
11.75	107.44	6.45088	2.88492	115.45	99.4302	5		98.594	17.3814	7.77318	120.176	77.0122	5
11.83	102.768	13.5075	6.04073	119.54	85.9963	5		103.234	11.9148	5.32845	118.028	88.4398	5
11.92	104.658	12.1221	5.42117	119.71	89.6064	5		106.346	21.9957	9.8368	133.657	79.0347	5
12	107.128	14.4864	6.4785	125.115	89.1408	5		96.312	20.0552	8.96894	121.214	71.4102	5
12.08	110.238	14.1522	6.32907	127.81	92.6657	5		91.756	17.6909	7.9116	113.722	69.7899	5
12.17	110.218	15.6173	6.98426	129.609	90.8266	5		86.596	17.2765	7.7263	108.048	65.1443	5
12.25	110.69	14.9441	6.68321	129.246	92.1344	5		89.144	17.7269	7.92771	111.155	67.1331	5
12.33	117.17	12.1488	5.43309	132.255	102.085	5		89.516	20.5525	9.19138	115.035	63.9967	5
12.42	117.45	11.7125	5.23798	131.993	102.907	5		92.81	17.2473	7.71324	114.225	71.3946	5
12.5	112.896	9.97057	4.45898	125.276	100.516	5		96.718	5.53756	2.47647	103.594	89.8422	5
12.58	110.116	15.806	7.06867	129.742	90.4902	5		98.838	4.54251	2.03147	104.478	93.1977	5
12.67	109.284	18.3444	8.20385	132.062	86.5065	5		100.332	11.236	5.0249	114.283	86.3806	5
12.75	101.698	17.7405	7.93378	123.726	79.6703	5		98.69	7.03135	3.14451	107.421	89.9594	5
12.83	108.052	20.0064	8.94715	132.893	83.2107	5		101.334	12.7423	5.69853	117.156	85.5124	5
12.92	100.674	13.9008	6.21663	117.934	83.4139	5		90.4	9.50277	4.24977	102.199	78.6008	5
13	98.288	6.81353	3.0471	106.748	89.8279	5		88.812	9.1253	4.08096	100.143	77.4814	5
13.08	94.762	7.39916	3.309	103.949	85.5747	5		89.472	12.0868	5.4054	104.48	74.4642	5
13.17	93.464	8.52213	3.81121	104.046	82.8824	5		87.902	19.2834	8.62378	111.845	63.9585	5
13.25	100.96	10.7127	4.79088	114.262	87.6584	5		84.886	8.48411	3.79421	95.4204	74.3516	5
13.33	102.414	9.89466	4.42503	114.7	90.1282	5		88.248	10.3033	4.60777	101.041	75.4548	5
13.42	102.468	17.7202	7.92473	124.471	80.4654	5		90.262	12.6422	5.65377	105.959	74.5646	5
13.5	103.384	14.954	6.68764	121.952	84.8161	5		84.714	13.0809	5.84994	100.956	68.472	5
13.58	104.716	18.182	8.13126	127.292	82.14	5		86.286	16.3561	7.31465	106.595	65.9773	5
13.67	104.004	13.8892	6.21142	121.25	86.7583	5		79.922	11.1309	4.97789	93.7428	66.1012	5
13.75	100.878	12.8957	5.76711	116.89	84.8659	5		82.776	11.7334	5.24735	97.345	68.207	5
13.83	100.972	19.7446	8.83007	125.488	76.4558	5		83.368	11.0867	4.95811	97.1339	69.6021	5
13.92	99.826	13.6415	6.10066	116.764	82.8878	5		81.838	9.1566	4.09495	93.2074	70.4686	5
14	94.582	9.55163	4.27162	106.442	82.7221	5		86.442	12.2562	5.48115	101.66	71.2239	5
14.08	94.512	15.8451	7.08616	114.186	74.8377	5		87.368	21.9353	9.80976	114.604	60.1318	5
14.17	91.612	12.5147	5.59676	107.151	76.0729	5		82.886	18.1377	8.1114	105.407	60.3651	5
14.25	93.954	11.5529	5.16662	108.299	79.6092	5		82.898	13.6041	6.08395	99.7898	66.0062	5
14.33	103.608	6.39495	2.85991	111.548	95.6676	5		102.478	23.0332	10.3008	131.077	73.8785	5
14.42	96.62	8.80162	3.9362	107.549	85.6913	5		84.828	10.5638	4.72426	97.9446	71.7114	5
14.5	102.522	12.3333	5.51563	117.836	87.2082	5		88.394	14.1743	6.33893	105.994	70.7943	5
14.58	99.682	11.7519	5.25562	114.274	85.09	5		103.934	13.7808	6.16294	121.045	86.8229	5
14.67	100.238	13.9583	6.24236	117.57	82.9064	5		102.606	20.1813	9.02535	127.664	77.5476	5
14.75	97.674	7.78983	3.48372	107.346	88.0016	5		99.79	24.025	10.7443	129.621	69.959	5
14.83	97.532	10.4693	4.68201	110.531	84.5326	5		92.86	9.58191	4.28516	104.758	80.9625	5
14.92	98.282	12.3419	5.51947	113.606	82.9575	5		92.11	14.9939	6.70547	110.727	73.4926	5
15	93.45	10.7053	4.78755	106.742	80.1576	5		88.824	15.0711	6.74001	107.537	70.1107	5
15.08	94.944	7.79794	3.48734	104.626	85.2616	5		87.776	11.5707	5.17457	102.143	73.4091	5
15.17	98.648	14.689	6.56914	116.887	80.4091	5		86.646	17.969	8.03597	108.957	64.3346	5
15.25	100.25	13.1742	5.8917	116.608	83.892	5		89.188	22.3421	9.99168	116.929	61.4467	5
15.33	97.774	14.1238	6.31636	115.311	80.237	5		82.228	23.1698	10.3618	110.997	53.4589	5
15.42	108.586	16.3669	7.31949	128.908	88.2638	5		89.18	18.6845	8.35597	112.38	65.9801	5
15.5	103.288	20.9956	9.38951	129.357	77.2185	5		78.696	12.0324	5.38105	93.6362	63.7558	5
15.58	102.224	13.3912	5.98872	118.851	85.5967	5		83.136	12.4809	5.58163	98.6331	67.6389	5
15.67	97.09	12.0805	5.40257	112.09	82.0901	5		84.01	10.934	4.88985	97.5864	70.4336	5
15.75	92.678	12.4154	5.55235	108.094	77.2622	5		91.108	9.16468	4.09857	102.487	79.7285	5
15.83	97.518	8.97253	4.01264	108.659	86.3771	5		92.748	10.6299	4.75384	105.947	79.5492	5
15.92	95.06	10.1536	4.54084	107.667	82.4526	5		93.128	18.8966	8.45082	116.591	69.6648	5
16	93.214	12.6219	5.64468	108.886	77.5419	5		87.648	18.7936	8.40476	110.983	64.3127	5
16.08	94.022	13.5619	6.06508	110.861	77.1826	5		84.68	17.63	7.88438	106.571	62.7894	5
16.17	94.952	11.7081	5.23603	109.49	80.4145	5		85.954	16.4115	7.33943	106.332	65.5765	5
16.25	92.15	11.714	5.23866	106.695	77.6051	5		84.402	5.75125	2.57204	91.5431	77.2609	5
16.33	95.374	11.801	5.27758	110.027	80.7211	5		85.956	8.41129	3.76164	96.4	75.512	5
16.42	98.734	10.1834	4.55414	111.378	86.0897	5		81.082	7.03962	3.14821	89.8228	72.3412	5
16.5	93.81	12.1692	5.44222	108.92	78.7	5		85.732	11.1071	4.96726	99.5233	71.9407	5
16.58	103.82	17.5933	7.86797	125.665	81.975	5		83.462	14.5734	6.51742	101.557	65.3668	5
16.67	110.122	17.3162	7.74403	131.623	88.6211	5		89.054	20.6172	9.22029	114.654	63.4544	5
16.75	103.688	20.7228	9.26752	129.419	77.9572	5		86.366	19.3558	8.65617	110.399	62.3326	5
16.83	100.916	17.1472	7.66846	122.207	79.625	5		91.568	17.2814	7.72848	113.026	70.1103	5
16.92	100.438	14.6037	6.53096	118.571	82.3051	5		89.642	22.0631	9.86694	117.037	62.247	5
17	97.19	18.899	8.45188	120.656	73.7238	5		90.988	15.3758	6.87628	110.08	71.8964	5
17.08	96.19	6.7284	3.00903	104.544	87.8356	5		90.988	13.2433	5.92257	107.432	74.5443	5
17.17	97.2	6.05894	2.70964	104.723	89.6768	5		93.164	14.3539	6.41925	110.987	75.3413	5
17.25	98.668	2.52798	1.13055	101.807	95.5291	5		86.412	13.3603	5.97491	103.001	69.823	5
17.33	95.578	9.20454	4.11639	107.007	84.1491	5		85.314	16.7173	7.47619	106.071	64.5568	5
17.42	93.782	8.82422	3.94631	104.739	82.8253	5		84.184	7.96882	3.56377	94.0786	74.2894	5
17.5	104.236	20.9089	9.35075	130.198	78.2742	5		82.288	9.54542	4.26884	94.1402	70.4358	5
17.58	98.072	14.784	6.61159	116.429	79.7153	5		85.236	17.1904	7.6878	106.581	63.8913	5
17.67	98.916	17.605	7.8732	120.775	77.0565	5		88.31	7.83776	3.50515	98.0419	78.5781	5
17.75	97.544	9.91796	4.43545	109.859	85.2292	5		84.436	8.57609	3.83534	95.0846	73.7874	5
17.83	96.078	11.6766	5.22194	110.576	81.5796	5		91.382	12.0587	5.39282	106.355	76.4091	5
17.92	98.206	9.88658	4.42141	110.482	85.9302	5		91.7	16.6015	7.42443	112.314	71.0865	5
18	101.548	18.548	8.29491	124.578	78.5176	5		77.536	9.01588	4.03203	88.7307	66.3413	5
18.08	103.994	20.9388	9.36412	129.993	77.995	5		73.396	12.1437	5.43084	88.4744	58.3176	5
18.17	96.472	12.7345	5.69504	112.284	80.66	5		76.568	11.0333	4.93423	90.2676	62.8684	5
18.25	90.012	11.2564	5.03402	103.989	76.0353	5		71.82	4.25028	1.90078	77.0974	66.5426	5
18.33	92.586	11.8841	5.31473	107.342	77.83	5		73.448	8.30662	3.71483	83.762	63.134	5
18.42	91.476	9.02332	4.03535	102.68	80.2721	5		82.98	7.85616	3.51338	92.7347	73.2253	5
18.5	90.19	8.65314	3.8698	100.934	79.4457	5		87.146	21.2516	9.504	113.533	60.7587	5
18.58	95.996	14.5984	6.52861	114.122	77.8697	5		89.996	18.741	8.38124	113.266	66.726	5
18.67	98.152	11.9369	5.33833	112.974	83.3304	5		91.028	14.3823	6.43195	108.886	73.1701	5
18.75	94.324	9.98105	4.46366	106.717	81.9309	5		85.586	15.9477	7.13204	105.388	65.7843	5
18.83	102.058	23.7551	10.6236	131.554	72.5622	5		94.528	24.8411	11.1093	125.372	63.6837	5
18.92	94.42	8.125	3.63361	104.509	84.3315	5		90.158	23.0409	10.3042	118.767	61.549	5
19	94.064	5.91074	2.64336	101.403	86.7248	5		93.048	24.8097	11.0953	123.853	62.2426	5
19.08	94.554	9.78866	4.37762	106.708	82.3998	5		86.17	18.3941	8.22608	109.009	63.3307	5
19.17	97	9.19173	4.11067	108.413	85.587	5		81.6	12.9844	5.8068	97.7223	65.4777	5
19.25	97.176	10.8435	4.84938	110.64	83.712	5		79.734	16.1353	7.21594	99.7687	59.6993	5
19.33	99.944	9.98934	4.46737	112.347	87.5406	5		79.946	14.0774	6.2956	97.4254	62.4666	5
19.42	95.002	9.83862	4.39997	107.218	82.7857	5		82	8.30859	3.71571	92.3165	71.6835	5
19.5	99.26	13.2079	5.90676	115.66	82.8602	5		78.262	11.8366	5.2935	92.9591	63.5649	5
19.58	95.54	16.1414	7.21865	115.582	75.4978	5		81.268	11.1448	4.98412	95.1061	67.4299	5
19.67	99.264	20.7146	9.26383	124.985	73.5435	5		87.136	16.3376	7.30641	107.422	66.8502	5
19.75	101.042	22.3392	9.9904	128.78	73.3042	5		91.814	19.4724	8.70833	115.992	67.6358	5
19.83	106.238	22.8309	10.2103	134.586	77.8897	5		94.646	19.0266	8.50895	118.271	71.0214	5
19.92	94.992	17.9534	8.02899	117.284	72.7	5		92.694	25.1737	11.258	123.951	61.4368	5
20	90.672	11.5253	5.15428	104.983	76.3614	5		90.442	24.3094	10.8715	120.626	60.2579	5
20.08	91.97	12.2836	5.49339	107.222	76.7179	5		88.916	16.7023	7.46952	109.655	68.1773	5
20.17	93.87	12.9832	5.80628	109.991	77.7492	5		89.944	14.7095	6.57828	108.208	71.6798	5
20.25	95.932	7.15711	3.20076	104.819	87.0453	5		86.058	6.91703	3.09339	94.6466	77.4694	5
20.33	97.094	15.1459	6.77344	115.9	78.2879	5		90.766	14.961	6.69075	109.343	72.1895	5
20.42	93.17	12.1542	5.43553	108.261	78.0785	5		84.976	18.0958	8.0927	107.445	62.5071	5
20.5	93.69	12.0496	5.38873	108.652	78.7285	5		88.524	17.2975	7.7357	110.002	67.0463	5
20.58	96.812	9.5166	4.25596	108.628	84.9956	5		87.514	17.6595	7.89756	109.441	65.5869	5
20.67	91.736	10.8066	4.83287	105.154	78.3178	5		89.694	23.6324	10.5687	119.037	60.3505	5
20.75	96.968	12.8629	5.75245	112.939	80.9966	5		93.162	22.9134	10.2472	121.613	64.7113	5
20.83	108.25	16.3168	7.29707	128.51	87.9901	5		90.57	22.2473	9.94931	118.194	62.9463	5
20.92	100.044	19.5209	8.73003	124.282	75.8056	5		85.45	10.8581	4.85589	98.9321	71.9679	5
21	97.888	15.8159	7.0731	117.526	78.2499	5		84.578	9.7498	4.36024	96.684	72.472	5
21.08	94.87	15.5582	6.95782	114.188	75.552	5		89.976	3.39858	1.51989	94.1959	85.7561	5
21.17	99.366	20.937	9.36332	125.363	73.3693	5		87.046	5.18068	2.31687	93.4787	80.6133	5
21.25	89.872	12.2833	5.49327	105.124	74.6203	5		85.016	8.81913	3.94404	95.9664	74.0656	5
21.33	89.536	13.8058	6.17413	106.678	72.3939	5		80.772	11.2125	5.01437	94.6941	66.8499	5
21.42	88.416	10.9204	4.88377	101.976	74.8565	5		81.294	11.1883	5.00354	95.1861	67.4019	5
21.5	88.356	10.8033	4.83139	101.77	74.9419	5		83.176	15.4252	6.89834	102.329	64.0231	5
21.58	90.208	16.7466	7.48929	111.002	69.4144	5		84.274	16.6302	7.43726	104.923	63.6249	5
21.67	96.586	14.7558	6.599	114.908	78.2642	5		89.688	21.8645	9.7781	116.836	62.5396	5
21.75	100.542	6.06605	2.71282	108.074	93.01	5		89.176	20.5097	9.17222	114.642	63.7098	5
21.83	98.984	16.5899	7.41922	119.583	78.3849	5		89.804	22.3728	10.0054	117.583	62.0246	5
21.92	95.716	16.9063	7.56071	116.708	74.7241	5		85.666	15.8999	7.11063	105.408	65.9237	5
22	93.298	11.6087	5.19156	107.712	78.8839	5		87.824	9.39716	4.20254	99.4921	76.1559	5
22.08	98.284	13.9111	6.22122	115.557	81.0111	5		83.81	7.69304	3.44043	93.3622	74.2578	5
22.17	97.926	7.61013	3.40335	107.375	88.4768	5		92.118	15.732	7.03555	111.652	72.5842	5
22.25	102.414	14.3168	6.40268	120.191	84.6373	5		85.764	11.4947	5.14057	100.037	71.4915	5
22.33	108.2	9.28424	4.15204	119.728	96.6721	5		89.272	12.9025	5.77016	105.293	73.2515	5
22.42	101.734	17.0211	7.61209	122.869	80.5995	5		84.104	10.6779	4.77531	97.3624	70.8456	5
22.5	101.23	14.1872	6.34472	118.846	83.6142	5		86.338	10.1167	4.5243	98.8995	73.7765	5
22.58	101.448	12.5647	5.61911	117.049	85.8469	5		90.634	18.6455	8.33853	113.785	67.4825	5
22.67	99.82	16.2313	7.25886	119.974	79.6662	5		88.354	17.6574	7.89664	110.279	66.4294	5
22.75	103.082	22.3772	10.0074	130.867	75.297	5		89.256	19.4929	8.71747	113.46	65.0524	5
22.83	105.362	17.4686	7.81218	127.052	83.6719	5		85.878	11.7464	5.25314	100.463	71.2929	5
22.92	97.95	15.9892	7.15057	117.803	78.0968	5		87.598	15.3321	6.85671	106.635	68.5607	5
23	103.384	11.4563	5.1234	117.609	89.1592	5		89.164	18.9758	8.48625	112.726	65.6024	5
23.08	99.59	10.987	4.91354	113.232	85.9478	5		97.002	25.9631	11.6111	129.239	64.7645	5
23.17	102.35	9.30842	4.16285	113.908	90.7921	5		94.272	25.0113	11.1854	125.328	63.2163	5
23.25	100.562	15.8602	7.09291	120.255	80.8689	5		100.368	20.9333	9.36167	126.36	74.3758	5
23.33	95.908	16.9287	7.57074	116.928	74.8883	5		99.758	25.59	11.4442	131.532	67.9838	5
23.42	96.202	16.1416	7.21875	116.244	76.1595	5		97.332	28.7433	12.8544	133.022	61.6425	5
23.5	95.894	16.3456	7.30998	116.19	75.5982	5		96.97	21.2241	9.49171	123.323	70.6168	5
23.58	102.082	24.3166	10.8747	132.275	71.8889	5		98.976	18.2652	8.16846	121.655	76.2967	5
23.67	111.678	15.4615	6.91461	130.876	92.48	5		89.658	13.205	5.90544	106.054	73.2619	5
23.75	106.372	13.7985	6.17089	123.505	89.2389	5		92.78	16.9433	7.57729	113.818	71.7421	5
23.83	108.648	22.7929	10.1933	136.949	80.3469	5		100.152	26.4369	11.823	132.978	67.3262	5
23.92	110.7	12.0152	5.37337	125.619	95.7811	5		104.262	28.685	12.8283	139.879	68.6448	5
24	113.126	21.066	9.42101	139.283	86.9691	5		104.202	16.1707	7.23177	124.281	84.1234	5
24.08	110.064	19.931	8.91342	134.812	85.3164	5		104.064	17.5189	7.83471	125.817	82.3114	5
24.17	105.676	20.4445	9.14304	131.061	80.2909	5		93.976	18.0728	8.08239	116.416	71.5357	5
24.25	105.788	20.6037	9.21424	131.371	80.2052	5		97.498	21.684	9.6974	124.422	70.5737	5
24.33	105.154	17.23	7.70548	126.548	83.7602	5		97.306	21.2324	9.4954	123.669	70.9426	5
24.42	105.836	17.4357	7.7975	127.485	84.1867	5		103.272	21.129	9.44918	129.507	77.0369	5
24.5	115.662	12.5407	5.60837	131.233	100.091	5		95.064	15.402	6.88801	114.188	75.9398	5
24.58	108.512	12.2016	5.45672	123.662	93.3617	5		96.716	17.7193	7.92433	118.717	74.7145	5
24.67	106.924	5.72341	2.55959	114.031	99.8174	5		102.932	18.9658	8.48175	126.481	79.3829	5
24.75	103.82	2.57619	1.15211	107.019	100.621	5		104.848	23.9912	10.7292	134.637	75.0589	5
24.83	100.946	4.99959	2.23588	107.154	94.7382	5		108.888	8.37953	3.74744	119.293	98.4834	5
24.92	106.494	7.72648	3.45539	116.088	96.9003	5		105.084	12.4328	5.5601	120.521	89.6467	5
25	99.28	11.7711	5.2642	113.896	84.6642	5		102.018	18.5401	8.29137	125.039	78.9975	5
25.08	111.016	15.7418	7.03995	130.562	91.47	5		98.97	18.5387	8.29074	121.989	75.9512	5
25.17	111.892	13.5007	6.03768	128.655	95.1287	5		104.436	13.8471	6.19262	121.629	87.2425	5
25.25	112.952	9.70552	4.34044	125.003	100.901	5		107.83	13.498	6.0365	124.59	91.07	5
25.33	115.94	14.3173	6.40288	133.717	98.1628	5		107.45	11.7374	5.24914	122.024	92.8761	5
25.42	108.396	12.7649	5.70862	124.246	92.5463	5		101.036	7.1133	3.18116	109.868	92.2037	5
25.5	112.106	8.47699	3.79102	122.632	101.58	5		104.89	10.2278	4.57401	117.59	92.1905	5
25.58	119.922	12.1251	5.4225	134.977	104.867	5		100.556	7.88621	3.52682	110.348	90.764	5
25.67	121.132	6.17477	2.76144	128.799	113.465	5		105.96	13.5624	6.06527	122.8	89.1201	5
25.75	113.938	7.52937	3.36724	123.287	104.589	5		104.128	7.43852	3.32661	113.364	94.8919	5
25.83	113.836	6.18874	2.76769	121.52	106.152	5		111	13.7094	6.13105	128.023	93.9775	5
25.92	113.598	7.17717	3.20973	122.51	104.686	5		105.672	15.7712	7.05311	125.255	86.0894	5
26	113.09	7.22666	3.23186	122.063	104.117	5		102.034	17.1313	7.66135	123.305	80.7627	5
26.08	113.336	7.94812	3.55451	123.205	103.467	5		104.418	14.4602	6.46678	122.373	86.4634	5
26.17	116.868	11.0619	4.94704	130.603	103.133	5		100.758	12.8581	5.75034	116.723	84.7925	5
26.25	115.526	13.1422	5.87736	131.844	99.2078	5		99.378	17.4534	7.80541	121.049	77.7067	5
26.33	113.734	13.5737	6.07035	130.588	96.88	5		100.344	10.1633	4.54518	112.963	87.7246	5
26.42	110.05	10.9608	4.9018	123.66	96.4404	5		107.276	11.3833	5.09078	121.41	93.1417	5
26.5	116.22	14.2695	6.38151	133.938	98.5021	5		104.862	13.8731	6.20424	122.088	87.6363	5
26.58	109.012	17.0823	7.63941	130.222	87.8016	5		107.82	14.218	6.3585	125.474	90.166	5
26.67	111.068	11.0242	4.93017	124.756	97.3797	5		101.164	9.55723	4.27412	113.031	89.2971	5
26.75	115.702	12.9652	5.79821	131.8	99.6036	5		99.668	9.79023	4.37832	111.824	87.5118	5
26.83	116.242	10.3397	4.62404	129.08	103.404	5		101.8	14.5442	6.50437	119.859	83.741	5
26.92	114.056	12.2161	5.46322	129.224	98.8877	5		99.712	16.957	7.5834	120.767	78.6571	5
27	115.278	10.5201	4.70471	128.34	102.216	5		96.67	15.9907	7.15126	116.525	76.8149	5
27.08	119.908	16.5527	7.40259	140.461	99.3551	5		99.538	21.4641	9.59906	126.189	72.8867	5
27.17	112.906	9.0483	4.04652	124.141	101.671	5		98.366	11.8051	5.27941	113.024	83.708	5
27.25	116.318	15.2137	6.80379	135.208	97.4276	5		106.278	17.8648	7.98939	128.46	84.0959	5
27.33	112.658	14.2062	6.3532	130.297	95.0187	5		112.096	15.0286	6.721	130.756	93.4355	5
27.42	113.554	19.6844	8.80312	137.995	89.1126	5		101.176	14.6473	6.55048	119.363	82.9889	5
27.5	108.224	15.7529	7.04493	127.784	88.6641	5		103.048	8.21624	3.67441	113.25	92.8462	5
27.58	106.914	15.675	7.01007	126.377	87.4509	5		101.984	13.9476	6.23757	119.302	84.6657	5
27.67	107.356	16.2158	7.25192	127.491	87.2214	5		106.326	12.7105	5.68429	122.108	90.5439	5
27.75	111.982	16.7289	7.48141	132.754	91.2103	5		110.672	13.2899	5.94341	127.174	94.1705	5
27.83	113.68	8.29154	3.70809	123.975	103.385	5		104.742	7.88443	3.52602	114.532	94.9522	5
27.92	111.644	7.9726	3.56545	121.543	101.745	5		101.118	8.85498	3.96007	112.113	90.1231	5
28	115.316	8.73179	3.90498	126.158	104.474	5		105.532	7.34384	3.28427	114.651	96.4134	5
28.08	116.19	10.1137	4.52298	128.748	103.632	5		106.9	7.2218	3.22969	115.867	97.933	5
28.17	106.256	11.7899	5.27262	120.895	91.6169	5		105.074	19.233	8.60124	128.955	81.1931	5
28.25	109.008	4.52903	2.02544	114.632	103.384	5		99.966	14.5085	6.48838	117.981	81.9514	5
28.33	111.646	7.61902	3.40733	121.106	102.186	5		100.772	14.7944	6.61627	119.142	82.4023	5
28.42	106.324	12.045	5.3867	121.28	91.3681	5		105.182	15.0554	6.73298	123.876	86.4882	5
28.5	105.518	11.3623	5.08139	119.626	91.4098	5		105.728	12.988	5.80839	121.855	89.6013	5
28.58	107.97	7.72741	3.4558	117.565	98.3752	5		105.328	12.8931	5.76599	121.337	89.319	5
28.67	114.862	9.98335	4.46469	127.258	102.466	5		102.592	13.3724	5.98031	119.196	85.988	5
28.75	113.134	14.9161	6.67068	131.655	94.6132	5		107.44	8.89888	3.9797	118.489	96.3906	5
28.83	117.858	12.5776	5.62486	133.475	102.241	5		114.452	16.2546	7.26926	134.635	94.2693	5
28.92	116.622	8.07021	3.60911	126.642	106.602	5		109.844	11.7994	5.27685	124.495	95.1931	5
29	111.722	9.98204	4.46411	124.116	99.3277	5		110.846	13.5224	6.04739	127.636	94.0558	5
29.08	115.464	10.2412	4.57999	128.18	102.748	5		103.024	1.14415	0.51168	104.445	101.603	5
29.17	107.672	14.6341	6.54455	125.843	89.5014	5		103.984	6.77874	3.03155	112.401	95.5671	5
29.25	112.462	12.4678	5.57577	127.943	96.9812	5		106.728	9.03151	4.03901	117.942	95.5139	5
29.33	112.068	14.9529	6.68713	130.634	93.5016	5		109.036	7.49936	3.35381	118.348	99.7243	5
29.42	116.434	14.6065	6.53223	134.57	98.2976	5		105.66	2.9337	1.31199	109.303	102.017	5
29.5	114.55	19.1121	8.54718	138.281	90.8192	5		100.654	5.3046	2.37229	107.241	94.0675	5
29.58	109.764	14.2218	6.36016	127.423	92.1054	5		97.71	6.13571	2.74397	105.328	90.0915	5
29.67	110.552	16.8179	7.52121	131.434	89.6698	5		103.588	8.42075	3.76587	114.044	93.1323	5
29.75	105.104	12.2051	5.45831	120.259	89.9493	5		102.686	6.64946	2.97373	110.942	94.4296	5
29.83	110.048	16.9673	7.58799	131.116	88.9804	5		107.06	10.374	4.6394	119.941	94.179	5
29.92	111.132	11.8548	5.30163	125.852	96.4123	5		109.174	14.6597	6.55602	127.376	90.9716	5
30	116.112	7.0386	3.14776	124.852	107.372	5		100.716	11.5104	5.14762	115.008	86.4239	5
30.08	116.236	9.30473	4.1612	127.789	104.683	5		103.84	11.6852	5.22579	118.349	89.3309	5
30.17	112.216	10.8348	4.84548	125.669	98.7628	5		106.168	8.36492	3.74091	116.554	95.7816	5
30.25	110.924	13.0442	5.83352	127.12	94.7275	5		103.44	8.99063	4.02073	114.603	92.2767	5
30.33	112.046	16.8651	7.54232	132.987	91.1052	5		107.358	6.09181	2.72434	114.922	99.794	5
30.42	108.78	14.6394	6.54692	126.957	90.6028	5		106.064	8.99676	4.02348	117.235	94.893	5
30.5	116.018	12.2325	5.47053	131.207	100.829	5		104.756	5.80065	2.59413	111.958	97.5535	5
30.58	116.23	10.2471	4.58266	128.954	103.506	5		100.692	11.5808	5.17907	115.071	86.3126	5
30.67	119.9	7.68399	3.43639	129.441	110.359	5		100.442	13.0329	5.82851	116.625	84.2595	5
30.75	116.208	9.43155	4.21792	127.919	104.497	5		98.632	11.3382	5.0706	112.71	84.5538	5
30.83	111.176	8.86572	3.96487	122.184	100.168	5		107.19	11.4811	5.13451	121.446	92.9343	5
30.92	114.754	8.79671	3.93401	125.677	103.831	5		103.718	13.0694	5.84483	119.946	87.4901	5
31	116.066	11.7163	5.23971	130.614	101.518	5		95.916	11.9697	5.35303	110.778	81.0536	5
31.08	114.024	7.28817	3.25937	123.073	104.975	5		100.392	3.56473	1.59419	104.818	95.9658	5
31.17	112.052	5.51562	2.46666	118.901	105.203	5		102.164	12.2206	5.4652	117.338	86.9902	5
31.25	109.446	2.84994	1.27453	112.985	105.907	5		95.698	14.797	6.61741	114.071	77.3251	5
31.33	107.29	11.3297	5.06681	121.358	93.2223	5		93.864	5.36024	2.39717	100.52	87.2084	5
31.42	103.516	10.4285	4.66378	116.465	90.5673	5		104.802	8.86521	3.96464	115.81	93.7944	5
31.5	100.15	9.62308	4.30357	112.099	88.2014	5		102.384	12.091	5.40727	117.397	87.371	5
31.58	105.958	10.4436	4.67052	118.925	92.9906	5		99.124	6.4483	2.88377	107.131	91.1174	5
31.67	99.976	11.3733	5.0863	114.098	85.8542	5		96.76	11.9138	5.32801	111.553	81.9671	5
31.75	110.252	13.3244	5.95886	126.796	93.7076	5		100.336	8.3029	3.71317	110.645	90.0266	5
31.83	105.258	13.1234	5.86898	121.553	88.9631	5		97.872	9.3077	4.16253	109.429	86.315	5
31.92	109.852	10.5225	4.70582	122.917	96.7865	5		97.46	5.91012	2.64309	104.798	90.1216	5
32	106.188	12.9239	5.77973	122.235	90.1409	5		103.522	12.7766	5.71385	119.386	87.6578	5
32.08	106.248	14.2123	6.35592	123.895	88.6011	5		104.264	11.3433	5.07289	118.349	90.1794	5
32.17	116.914	5.37572	2.4041	123.589	110.239	5		105.002	19.7255	8.82151	129.494	80.5096	5
32.25	122.426	10.915	4.88133	135.979	108.873	5		107.128	10.6594	4.76705	120.363	93.8926	5
32.33	116.514	18.5584	8.29955	139.557	93.4708	5		107.226	6.36925	2.84841	115.134	99.3175	5
32.42	115.358	8.70159	3.89147	126.162	104.554	5		103.848	9.00757	4.02831	115.032	92.6636	5
32.5	113.074	14.658	6.55524	131.274	94.8737	5		109.876	3.70532	1.65707	114.477	105.275	5
32.58	116.798	14.7742	6.60721	135.143	98.4535	5		113.312	12.7899	5.71981	129.193	97.4313	5
32.67	117.724	5.49338	2.45671	124.545	110.903	5		108.48	11.3331	5.06831	122.552	94.4081	5
32.75	111.742	13.2792	5.93864	128.23	95.2537	5		105.538	13.1759	5.89244	121.898	89.178	5
32.83	114.134	15.8166	7.07338	133.773	94.4952	5		103.652	13.3276	5.96029	120.2	87.1036	5
32.92	116.558	10.5233	4.70616	129.624	103.492	5		106.72	11.1111	4.96906	120.516	92.9237	5
33	112.652	11.9917	5.36285	127.542	97.7623	5		109.042	13.3177	5.95585	125.578	92.5059	5
33.08	112.424	10.6407	4.75865	125.636	99.2119	5		99.068	15.1445	6.77283	117.872	80.2636	5
33.17	113.162	8.55775	3.82714	123.788	102.536	5		106.94	5.22606	2.33716	113.429	100.451	5
33.25	116.548	8.88208	3.97219	127.577	105.519	5		109.028	9.02748	4.03721	120.237	97.8189	5
33.33	113.178	12.4174	5.55324	128.596	97.7597	5		103.14	11.1054	4.9665	116.929	89.3508	5
33.42	113.898	15.4402	6.90505	133.069	94.7265	5		111.578	13.3101	5.95247	128.105	95.0513	5
33.5	108.296	17.3713	7.76869	129.865	86.7267	5		102.948	9.99239	4.46873	115.355	90.5408	5
33.58	103.946	10.43	4.66444	116.897	90.9954	5		96.844	9.29488	4.1568	108.385	85.3029	5
33.67	102.628	16.7264	7.48027	123.397	81.8594	5		101.278	12.2149	5.46268	116.445	86.1112	5
33.75	108.2	5.67157	2.5364	115.242	101.158	5		103.844	10.9084	4.87837	117.389	90.2995	5
33.83	100.068	10.7982	4.8291	113.476	86.6603	5		109.268	10.2215	4.57118	121.96	96.5764	5
33.92	107.46	9.13868	4.08694	118.807	96.1128	5		105.692	15.9471	7.13176	125.493	85.8911	5
34	109.386	15.5596	6.95846	128.706	90.0662	5		105.536	13.3721	5.98019	122.14	88.9323	5
34.08	110.044	15.0302	6.72173	128.707	91.3815	5		114.198	16.4702	7.3657	134.648	93.7476	5
34.17	111.722	17.0152	7.60942	132.849	90.5949	5		110.418	14.1256	6.31718	127.957	92.8787	5
34.25	116.552	11.1206	4.9733	130.36	102.744	5		109.618	11.5494	5.16504	123.958	95.2775	5
34.33	113.004	14.9218	6.67324	131.532	94.4761	5		104.12	16.199	7.24442	124.234	84.0063	5
34.42	120.68	10.8788	4.86513	134.188	107.172	5		105.018	16.4449	7.3544	125.437	84.5989	5
34.5	118.578	13.8846	6.20939	135.818	101.338	5		104.992	9.46226	4.23165	116.741	93.2431	5
34.58	122.632	9.75103	4.36079	134.74	110.524	5		107.962	6.90239	3.08684	116.532	99.3916	5
34.67	119.666	11.7221	5.24227	134.221	105.111	5		108.282	7.30385	3.26638	117.351	99.2131	5
34.75	119.408	12.0961	5.40955	134.427	104.389	5		107.594	18.2386	8.15656	130.24	84.9478	5
34.83	119.792	11.7297	5.24566	134.356	105.228	5		106.548	9.275	4.1479	118.064	95.0316	5
34.92	116.04	8.65656	3.87133	126.789	105.291	5		101.824	9.06897	4.05577	113.085	90.5634	5
35	117.204	12.9453	5.7893	133.278	101.13	5		105.658	13.1791	5.89386	122.022	89.294	5
35.08	116.5	11.2268	5.02079	130.44	102.56	5		104.934	13.9929	6.25779	122.308	87.5596	5
35.17	116.194	7.01279	3.13622	124.902	107.486	5		104.08	15.7255	7.03265	123.606	84.5542	5
35.25	109.696	13.1105	5.86318	125.975	93.4172	5		105.368	13.537	6.05394	122.176	88.5596	5
35.33	113.266	12.041	5.38489	128.217	98.3151	5		103.192	11.2192	5.0174	117.123	89.2615	5
35.42	110.078	17.1144	7.6538	131.328	88.8276	5		96.646	15.8031	7.06735	116.268	77.0239	5
35.5	104.602	16.3954	7.33223	124.96	84.2445	5		97.95	15.1611	6.78024	116.775	79.125	5
35.58	111.826	17.4018	7.78233	133.433	90.2188	5		95.734	13.5081	6.04103	112.507	78.9614	5
35.67	105.96	9.98244	4.46428	118.355	93.5652	5		98.72	11.8339	5.29228	113.414	84.0263	5
35.75	99.674	8.68229	3.88284	110.454	88.8935	5		95.154	12.7368	5.69607	110.969	79.3392	5
35.83	98.734	9.86	4.40953	110.977	86.4912	5		94.376	17.2378	7.70899	115.78	72.9724	5
35.92	110.208	6.79121	3.03712	118.64	101.776	5		92.656	10.5226	4.70586	105.722	79.5904	5
36	103.258	6.76688	3.02624	111.66	94.8558	5		86.496	5.59796	2.50348	93.4468	79.5452	5
36.08	105.76	13.2331	5.91804	122.191	89.3289	5		90.854	5.55021	2.48213	97.7455	83.9625	5
36.17	104.058	10.27	4.59288	116.81	91.3061	5		87.43	11.3828	5.09052	101.564	73.2964	5
36.25	103.11	10.2459	4.5821	115.832	90.388	5		87.408	7.25943	3.24651	96.4218	78.3942	5
36.33	101.736	10.168	4.54725	114.361	89.1108	5		85.628	6.04005	2.70119	93.1277	78.1283	5
36.42	97.45	6.134	2.74321	105.066	89.8336	5		92.798	15.0991	6.75251	111.546	74.05	5
36.5	97.942	11.4669	5.12817	112.18	83.7039	5		96.786	11.3445	5.07342	110.872	82.6999	5
36.58	103.158	16.4842	7.37197	123.626	82.6901	5		96.772	14.2579	6.37632	114.476	79.0685	5
36.67	102.846	11.0938	4.96131	116.621	89.0712	5		101.464	12.6218	5.64464	117.136	85.792	5
36.75	98.468	10.6874	4.77955	111.738	85.1978	5		92.558	14.8951	6.66129	111.053	74.0633	5
36.83	95.746	10.1747	4.55027	108.38	83.1124	5		91.794	7.49776	3.3531	101.104	82.4843	5
36.92	105.072	12.9152	5.77585	121.108	89.0357	5		95.924	12.5372	5.6068	111.491	80.357	5
37	102.196	10.4716	4.68303	115.198	89.1938	5		97.726	16.119	7.20866	117.74	77.7116	5
37.08	99.162	11.7948	5.27478	113.807	84.5169	5		102.358	26.3599	11.7885	135.088	69.6279	5
37.17	96.894	12.4594	5.57202	112.364	81.4236	5		93.714	13.657	6.10761	110.671	76.7566	5
37.25	97.622	13.5688	6.06816	114.47	80.7741	5		87.64	8.55373	3.82534	98.2609	77.0191	5
37.33	95.85	7.79316	3.48521	105.526	86.1735	5		88.99	13.6447	6.1021	105.932	72.0479	5
37.42	90.2	8.79077	3.93135	101.115	79.2848	5		91.754	14.9042	6.66536	110.26	73.248	5
37.5	95.544	12.1111	5.41625	110.582	80.5061	5		84.154	7.23619	3.23612	93.1389	75.1691	5
37.58	96.958	8.37449	3.74519	107.356	86.5597	5		82.23	10.4456	4.6714	95.1999	69.2601	5
37.67	93.444	8.49683	3.7999	103.994	82.8938	5		85.622	10.3782	4.64128	98.5083	72.7357	5
37.75	93.23	8.9535	4.00413	104.347	82.1128	5		92.05	10.2624	4.5895	104.793	79.3075	5
37.83	96.048	12.8279	5.73682	111.976	80.12	5		90.172	10.8422	4.84879	103.634	76.7096	5
37.92	93.148	11.0231	4.92968	106.835	79.461	5		92.418	12.6656	5.66424	108.144	76.6916	5
38	97.79	17.6244	7.88186	119.674	75.9064	5		86.908	12.1012	5.41184	101.934	71.8823	5
38.08	99.706	9.87036	4.41416	111.962	87.4503	5		89.796	16.0593	7.18196	109.736	69.8557	5
38.17	96.578	9.70357	4.33957	108.627	84.5294	5		90.724	14.9188	6.67187	109.248	72.1999	5
38.25	96.064	9.46494	4.23285	107.816	84.3117	5		87.7	8.24959	3.68933	97.9432	77.4568	5
38.33	94.718	7.71978	3.45239	104.303	85.1326	5		90.732	15.4901	6.92739	109.966	71.4985	5
38.42	93.188	11.1669	4.99401	107.054	79.3224	5		90.888	14.506	6.48729	108.9	72.8764	5
38.5	96.146	12.7389	5.69703	111.963	80.3285	5		85.322	10.6713	4.77233	98.5721	72.0719	5
38.58	91.446	13.1739	5.89153	107.804	75.0885	5		84.854	13.6182	6.09024	101.763	67.9448	5
38.67	94.358	15.981	7.14691	114.201	74.515	5		88.118	9.42892	4.21674	99.8255	76.4105	5
38.75	96.384	18.6242	8.32899	119.509	73.259	5		86.532	9.75675	4.36335	98.6466	74.4174	5
38.83	94.94	19.6481	8.78689	119.336	70.5437	5		89.618	6.06328	2.71158	97.1466	82.0894	5
38.92	98.324	20.3281	9.09101	123.565	73.0833	5		86.738	8.40783	3.7601	97.1777	76.2983	5
39	95.126	13.1734	5.89132	111.483	78.7691	5		82.972	7.28053	3.25595	92.012	73.932	5
39.08	92.202	10.1322	4.53127	104.783	79.6212	5		81.692	6.1059	2.73064	89.2735	74.1105	5
39.17	90.346	13.4334	6.00759	107.026	73.6663	5		87.738	9.16673	4.09949	99.12	76.356	5
39.25	96.924	7.87734	3.52285	106.705	87.143	5		85.308	9.77686	4.37235	97.4476	73.1684	5
39.33	90.432	12.325	5.51192	105.736	75.1285	5		91.146	17.02	7.61157	112.279	70.0129	5
39.42	91.174	7.73241	3.45804	100.775	81.5729	5		98.626	15.764	7.0499	118.2	79.0523	5
39.5	92.184	11.0727	4.95188	105.933	78.4354	5		93.112	19.1513	8.56471	116.891	69.3325	5
39.58	90.564	11.0203	4.92842	104.247	76.8805	5		94.9	18.5407	8.29168	117.921	71.8786	5
39.67	91.052	10.6472	4.76158	104.272	77.8317	5		97.074	29.2426	13.0777	133.383	60.7645	5
39.75	95.966	10.6859	4.77888	109.234	82.6977	5		91.152	11.9827	5.35884	106.031	76.2735	5
39.83	94.764	9.3639	4.18766	106.391	83.1372	5		86.644	15.8061	7.0687	106.27	67.0181	5
39.92	95.534	6.43111	2.87608	103.519	87.5487	5		96.656	30.0485	13.4381	133.966	59.3459	5
40	92.186	5.27153	2.3575	98.7315	85.6405	5		87.612	16.2082	7.24851	107.737	67.4869	5
40.08	100.722	12.2239	5.46668	115.9	85.5441	5		82.928	16.2497	7.26709	103.105	62.7513	5
40.17	99.27	20.9892	9.38667	125.332	73.2084	5		85.966	16.1841	7.23775	106.061	65.8708	5
40.25	95.202	18.0568	8.07522	117.622	72.7816	5		84.854	15.2295	6.81084	103.764	65.9441	5
40.33	95.668	17.588	7.86561	117.506	73.8296	5		90.086	4.14762	1.85487	95.2359	84.9361	5
40.42	90.822	11.7945	5.27467	105.467	76.1772	5		86.296	12.8163	5.73162	102.21	70.3825	5
40.5	91.41	12.1587	5.43754	106.507	76.313	5		89.274	13.6889	6.12187	106.271	72.277	5
40.58	96.17	15.4698	6.91832	115.378	76.9617	5		81.02	16.2444	7.26473	101.19	60.8499	5
40.67	93.958	9.45803	4.22976	105.702	82.2143	5		84.072	8.8185	3.94376	95.0216	73.1224	5
40.75	95.796	12.3249	5.51188	111.099	80.4926	5		81.434	8.4074	3.75991	91.8732	70.9948	5
40.83	94.196	12.1759	5.44521	109.314	79.0777	5		76.086	6.99117	3.12655	84.7667	67.4053	5
40.92	92.952	11.6693	5.21868	107.441	78.4626	5		79.628	8.57293	3.83393	90.2727	68.9833	5
41	94.17	12.5399	5.608	109.74	78.5997	5		79.53	8.09209	3.61889	89.5777	69.4823	5
41.08	95.538	16.9693	7.58889	116.608	74.4679	5		77.19	7.26971	3.25112	86.2165	68.1635	5
41.17	99.056	15.2639	6.82624	118.009	80.1033	5		83.528	6.63603	2.96772	91.7677	75.2883	5
41.25	99.81	11.5182	5.15109	114.112	85.5083	5		84.684	20.0187	8.95262	109.54	59.8275	5
41.33	100.058	8.97387	4.01323	111.201	88.9155	5		89.752	20.6705	9.24413	115.418	64.0862	5
41.42	95.136	11.8379	5.29408	109.835	80.4373	5		89.114	15.8136	7.07204	108.749	69.4789	5
41.5	93.386	12.7695	5.71069	109.241	77.5306	5		86.458	13.3544	5.97229	103.04	69.8763	5
41.58	88.242	10.829	4.84287	101.688	74.796	5		80.68	8.23099	3.68101	90.9001	70.4599	5
41.67	91.86	12.1344	5.42668	106.927	76.7931	5		85.458	12.9915	5.80997	101.589	69.3269	5
41.75	87.258	11.7642	5.26111	101.865	72.6508	5		87.402	18.6064	8.32102	110.505	64.2992	5
41.83	87.16	9.60816	4.2969	99.0901	75.2299	5		86.368	12.5523	5.61357	101.954	70.7822	5
41.92	88.534	10.8237	4.84048	101.973	75.0947	5		95.336	15.7907	7.06182	114.943	75.7292	5
42	85.266	8.47778	3.79138	95.7926	74.7394	5		92.456	21.7832	9.74175	119.503	65.4086	5
42.08	84.926	8.77737	3.92536	95.8245	74.0275	5		96.524	12.1164	5.41862	111.568	81.4795	5
42.17	89.588	15.8445	7.08587	109.262	69.9145	5		100.094	13.4325	6.00719	116.773	83.4154	5
42.25	94.012	16.9737	7.59086	115.088	72.9364	5		97.628	14.7868	6.61286	115.988	79.2678	5
42.33	94.79	15.83	7.07937	114.445	75.1345	5		87.812	12.1605	5.43834	102.911	72.7128	5
42.42	87.49	11.7425	5.25142	102.07	72.9097	5		85.538	8.10987	3.62684	95.6077	75.4683	5
42.5	94.348	8.35233	3.73528	104.719	83.9772	5		82.716	12.8534	5.74823	98.6756	66.7564	5
42.58	91.134	9.69017	4.33357	103.166	79.1021	5		78.516	7.2549	3.24449	87.5242	69.5078	5
42.67	98.638	7.17148	3.20718	107.543	89.7334	5		83.534	11.8964	5.32024	98.3054	68.7626	5
42.75	97.296	14.0777	6.29575	114.776	79.8162	5		86.71	17.3365	7.7531	108.236	65.1839	5
42.83	100.296	16.805	7.51543	121.162	79.4298	5		83.63	14.5769	6.51897	101.73	65.5304	5
42.92	99.146	15.5259	6.9434	118.424	79.868	5		80.236	11.8909	5.31776	95.0005	65.4715	5
43	95.638	19.3851	8.66927	119.708	71.5683	5		85.444	15.4721	6.91933	104.655	66.2329	5
43.08	103.842	18.8801	8.44343	127.285	80.3993	5		80.776	11.9117	5.32708	95.5663	65.9857	5
43.17	97.008	17.6794	7.90648	118.96	75.0561	5		84.728	14.4657	6.46925	102.69	66.7665	5
43.25	93.876	16.2023	7.24591	113.994	73.7581	5		84.784	11.4778	5.13304	99.0356	70.5324	5
43.33	98.872	16.9534	7.58178	119.922	77.8216	5		82.878	13.4476	6.01396	99.5754	66.1806	5
43.42	101.236	14.1455	6.32605	118.8	83.6721	5		84.502	11.5198	5.15181	98.8057	70.1983	5
43.5	101.358	13.2457	5.92367	117.805	84.9113	5		79.99	14.8525	6.64223	98.4318	61.5482	5
43.58	95.176	13.8167	6.17901	112.332	78.0203	5		82.082	13.8641	6.20021	99.2965	64.8675	5
43.67	88.144	11.5386	5.1602	102.471	73.817	5		84.588	13.9654	6.24551	101.928	67.2477	5
43.75	87.42	11.0993	4.96376	101.202	73.6384	5		87.708	11.9508	5.34456	102.547	72.8691	5
43.83	89.14	9.24266	4.13344	100.616	77.6637	5		92.594	14.3312	6.40912	110.389	74.7994	5
43.92	90.454	11.852	5.30039	105.17	75.7378	5		88.79	12.0865	5.40523	103.797	73.7827	5
44	95.864	7.197	3.2186	104.8	86.9277	5		94.968	21.0112	9.39651	121.057	68.8791	5
44.08	98.3	14.3245	6.40609	116.086	80.5138	5		95.58	27.2428	12.1834	129.406	61.7536	5
44.17	90.08	11.1537	4.98808	103.929	76.2309	5		95.37	27.8911	12.4733	130.001	60.7386	5
44.25	88.368	11.3828	5.09052	102.502	74.2344	5		92.158	29.347	13.1244	128.597	55.7189	5
44.33	96.68	13.5108	6.04222	113.456	79.9041	5		92.922	28.7827	12.872	128.66	57.1835	5
44.42	100.018	6.93731	3.10246	108.632	91.4042	5		82.95	14.1819	6.34236	100.559	65.3408	5
44.5	95.362	10.8281	4.84249	108.807	81.9171	5		84.768	13.2497	5.92543	101.22	68.3164	5
44.58	94.87	10.0361	4.48827	107.331	82.4086	5		87.048	16.1851	7.2382	107.144	66.9515	5
44.67	89.966	9.94951	4.44956	102.32	77.612	5		83.258	9.72114	4.34742	95.3284	71.1876	5
44.75	86.818	7.71803	3.45161	96.4012	77.2348	5		82.65	13.911	6.2212	99.9228	65.3772	5
44.83	94.506	18.8936	8.44947	117.965	71.0465	5		84.692	5.43639	2.43123	91.4422	77.9418	5
44.92	95.636	19.8784	8.88988	120.318	70.9537	5		88.202	7.72072	3.45281	97.7885	78.6155	5
45	96.078	13.4296	6.0059	112.753	79.4029	5		87.416	10.0185	4.4804	99.8556	74.9764	5
45.08	100.424	17.8466	7.98123	122.583	78.2645	5		91.266	17.6912	7.91175	113.233	69.2995	5
45.17	100.208	19.5409	8.73895	124.471	75.9448	5		93.592	13.0941	5.85588	109.851	77.3335	5
45.25	103.07	11.3709	5.08521	117.189	88.9512	5		91.322	14.6131	6.53518	109.467	73.1774	5
45.33	97.742	7.8943	3.53044	107.544	87.9399	5		91.522	12.6109	5.63976	107.18	75.8635	5
45.42	94.122	11.3353	5.0693	108.197	80.0474	5		89.808	11.3665	5.08326	103.921	75.6946	5
45.5	93.184	9.40766	4.20723	104.865	81.5028	5		90.322	15.6171	6.98416	109.713	70.9309	5
45.58	91.14	14.6297	6.54259	109.305	72.9749	5		83.426	10.9654	4.90387	97.0413	69.8107	5
45.67	90.218	13.1254	5.86988	106.515	73.9206	5		83.452	8.25138	3.69013	93.6974	73.2066	5
45.75	87.704	15.0799	6.74392	106.428	68.9799	5		89.536	8.03576	3.5937	99.5137	79.5583	5
45.83	92.81	18.6269	8.33022	115.938	69.6816	5		85.532	8.69163	3.88701	96.3241	74.7399	5
45.92	94.456	17.7755	7.94943	116.527	72.3848	5		88.01	6.58991	2.9471	96.1925	79.8275	5
46	103.888	25.1219	11.2349	135.081	72.695	5		88.232	4.52439	2.02337	93.8498	82.6142	5
46.08	101.718	15.3109	6.84726	120.729	82.707	5		91.216	13.6409	6.10039	108.153	74.2786	5
46.17	103.33	16.851	7.536	124.253	82.4067	5		89.426	13.1209	5.86783	105.718	73.1343	5
46.25	99.872	7.80527	3.49062	109.564	90.1805	5		86.738	21.6416	9.67843	113.61	59.8664	5
46.33	102.18	9.63778	4.31015	114.147	90.2131	5		87.218	13.5886	6.07702	104.091	70.3455	5
46.42	98.8	9.82207	4.39256	110.996	86.6043	5		83.53	8.61793	3.85406	94.2306	72.8294	5
46.5	98.068	10.9862	4.91319	111.709	84.4268	5		81.26	7.41847	3.31764	90.4713	72.0487	5
46.58	90.868	11.6084	5.19143	105.282	76.4543	5		81.984	12.5395	5.60782	97.5538	66.4142	5
46.67	95.716	21.1249	9.44735	121.946	69.486	5		93.652	18.0632	8.07812	116.08	71.2236	5
46.75	96.68	18.3069	8.18708	119.411	73.949	5		91.322	17.7286	7.92848	113.335	69.309	5
46.83	97.504	20.8697	9.33322	123.417	71.5908	5		92.642	21.2853	9.51907	119.071	66.2128	5
46.92	101.102	18.2069	8.14238	123.709	78.4951	5		98.148	9.53556	4.26443	109.988	86.308	5
47	92.328	17.6341	7.88621	114.224	70.4324	5		90.108	17.9817	8.04167	112.435	67.7807	5
47.08	94.706	14.4738	6.47289	112.678	76.7344	5		84.544	16.5889	7.41877	105.142	63.9462	5
47.17	100.134	20.295	9.0762	125.334	74.9344	5		93.194	22.199	9.92767	120.758	65.6304	5
47.25	101.648	22.5335	10.0773	129.627	73.669	5		97.164	23.0904	10.3263	125.835	68.4935	5
47.33	100.992	22.5254	10.0737	128.961	73.023	5		93.778	17.1927	7.68879	115.126	72.4305	5
47.42	104.028	16.6601	7.45064	124.714	83.3417	5		90.676	18.5323	8.2879	113.687	67.6651	5
47.5	100.06	20.8919	9.34314	126.001	74.1193	5		91.596	19.3597	8.65794	115.634	67.5577	5
47.58	98.868	17.5964	7.86936	120.717	77.0192	5		95.734	21.855	9.77387	122.871	68.5974	5
47.67	97.668	21.8041	9.75109	124.741	70.5946	5		103.12	25.1445	11.245	134.341	71.8989	5
47.75	105.316	19.7546	8.83452	129.845	80.7874	5		96.426	27.0871	12.1137	130.059	62.7929	5
47.83	110.338	11.6567	5.21302	124.812	95.8643	5		109.736	31.2822	13.9898	148.578	70.894	5
47.92	107.278	17.3033	7.73828	128.763	85.7931	5		95.85	16.0503	7.17789	115.779	75.921	5

## Sheet: Figure 9D
			Baseline							+ Tamoxifen						Pulse pressure day	Control	Stim1 smKO		Pulse pressure night	Control	Stim1 smKO
Time (h)	Mean	SD	SEM	Upper limit	Lower limit	N		Mean	SD	SEM	Upper limit	Lower limit	N			Mouse 1	21.6929	15.0931		Mouse 1	22.225	16.0072
0	28.23	4.99589	2.23423	34.4332	22.0268	5		22.386	4.25716	1.90386	27.672	17.1	5			Mouse 2	25.2616	13.9431		Mouse 2	27.4495	15.9462
0.08	28.794	2.90731	1.30019	32.4039	25.1841	5		22.012	4.59299	2.05405	27.715	16.309	5			Mouse 3	27.866	22.5855		Mouse 3	30.068	25.5485
0.17	29.97	3.0403	1.35966	33.745	26.195	5		18.584	3.81723	1.70712	23.3237	13.8443	5			Mouse 4	28.9399	21.4573		Mouse 4	31.8634	23.4171
0.25	26.698	3.07454	1.37497	30.5155	22.8805	5		18.088	5.73058	2.56279	25.2035	10.9725	5			Mouse 5	32.4613	21.4481		Mouse 5	33.2876	22.165
0.33	26.924	3.70856	1.65852	31.5288	22.3192	5		18.236	2.31159	1.03377	21.1062	15.3658	5
0.42	26.02	3.51786	1.57324	30.388	21.652	5		19.8	5.40472	2.41706	26.5108	13.0892	5		Paired t test				Paired t test
0.5	23.738	6.16064	2.75512	31.3874	16.0886	5		17.55	5.48502	2.45298	24.3606	10.7394	5		P value	0.0023			P value	0.0035
0.58	25.89	4.52017	2.02148	31.5025	20.2775	5		20.444	4.15138	1.85655	25.5986	15.2894	5		Significantly different (P < 0.05)?	Yes			Significantly different (P < 0.05)?	Yes
0.67	28.21	4.10404	1.83538	33.3058	23.1142	5		16.212	2.36227	1.05644	19.1451	13.2789	5		One- or two-tailed P value?	Two-tailed			One- or two-tailed P value?	Two-tailed
0.75	28.056	2.98805	1.3363	31.7662	24.3458	5		18.08	2.84974	1.27444	21.6184	14.5416	5
0.83	23.96	4.03337	1.80378	28.9681	18.9519	5		20.416	6.13089	2.74182	28.0285	12.8035	5		Mean of differences (B - A)	-8.339			Mean of differences (B - A)	-8.362
0.92	23.898	3.57648	1.59945	28.3388	19.4572	5		18.638	4.07281	1.82142	23.6951	13.5809	5		SD of differences	2.699			SD of differences	3.036
1	24.034	3.7603	1.68166	28.703	19.365	5		18.53	4.41148	1.97287	24.0076	13.0524	5		SEM of differences	1.207			SEM of differences	1.358
1.08	24.14	6.18794	2.76733	31.8233	16.4567	5		20.954	6.90168	3.08653	29.5236	12.3844	5		95% confidence interval	-11.69 to -4.987			95% confidence interval	-12.13 to -4.593
1.17	27.598	5.55959	2.48633	34.5011	20.6949	5		21.144	6.95973	3.11249	29.7856	12.5024	5
1.25	28.854	4.12459	1.84457	33.9754	23.7326	5		20.696	4.59117	2.05324	26.3967	14.9953	5
1.33	27.724	4.71365	2.10801	33.5768	21.8712	5		19.696	5.10261	2.28196	26.0317	13.3603	5
1.42	28.924	4.27128	1.91017	34.2275	23.6205	5		19.46	4.87344	2.17947	25.5112	13.4088	5
1.5	29.22	3.63691	1.62648	33.7358	24.7042	5		21.746	6.00645	2.68617	29.204	14.288	5
1.58	28.128	5.4797	2.45059	34.9319	21.3241	5		22.81	4.68693	2.09606	28.6296	16.9904	5
1.67	28.588	6.55484	2.93141	36.7269	20.4491	5		21.002	3.50275	1.56648	25.3512	16.6528	5
1.75	26.77	5.85132	2.61679	34.0354	19.5046	5		21.516	2.84261	1.27125	25.0456	17.9864	5
1.83	26.5	7.78182	3.48014	36.1624	16.8376	5		23.786	7.28124	3.25627	32.8269	14.7451	5
1.92	25.704	5.99149	2.67947	33.1434	18.2646	5		20.834	3.47005	1.55186	25.1426	16.5254	5
2	26.67	6.91733	3.09353	35.259	18.081	5		19.04	3.74309	1.67396	23.6877	14.3923	5
2.08	26.554	6.87196	3.07324	35.0867	18.0213	5		23.032	4.13366	1.84863	28.1646	17.8994	5
2.17	27.188	7.01947	3.1392	35.9038	18.4722	5		21.484	3.00115	1.34215	25.2104	17.7576	5
2.25	26.624	5.32554	2.38165	33.2365	20.0115	5		20.276	4.53803	2.02947	25.9107	14.6413	5
2.33	25.796	5.3852	2.40833	32.4826	19.1094	5		19.724	5.19258	2.32219	26.1714	13.2766	5
2.42	27.99	6.46113	2.8895	36.0125	19.9675	5		19.37	5.84929	2.61588	26.6328	12.1072	5
2.5	28.304	6.70774	2.99979	36.6328	19.9752	5		21.89	3.87899	1.73474	26.7064	17.0736	5
2.58	26.508	5.34135	2.38872	33.1402	19.8758	5		20.068	5.24313	2.3448	26.5782	13.5578	5
2.67	27.194	5.87098	2.62558	34.4838	19.9042	5		17.814	6.90304	3.08713	26.3853	9.24275	5
2.75	28.736	5.3308	2.38401	35.3551	22.1169	5		19.472	4.17354	1.86647	24.6541	14.2899	5
2.83	28.266	2.59988	1.1627	31.4942	25.0378	5		19.798	3.18671	1.42514	23.7548	15.8412	5
2.92	26.394	1.91897	0.858188	28.7767	24.0113	5		21.296	5.11317	2.28668	27.6448	14.9472	5
3	26.95	1.56232	0.698692	28.8899	25.0101	5		19.69	5.74275	2.56823	26.8206	12.5594	5
3.08	27.968	4.42576	1.97926	33.4633	22.4727	5		18.506	4.99782	2.23509	24.7116	12.3004	5
3.17	29.68	4.09288	1.83039	34.762	24.598	5		18.296	2.04827	0.916016	20.8393	15.7527	5
3.25	30.59	4.85112	2.16949	36.6135	24.5665	5		19.758	3.7559	1.67969	24.4216	15.0944	5
3.33	27.35	7.51928	3.36272	36.6864	18.0136	5		20.216	5.0737	2.26903	26.5158	13.9162	5
3.42	27.074	5.13839	2.29796	33.4542	20.6938	5		21.216	5.38591	2.40865	27.9035	14.5285	5
3.5	29.092	4.77047	2.13342	35.0153	23.1687	5		21.384	4.78355	2.13927	27.3236	15.4444	5
3.58	32.326	5.01389	2.24228	38.5516	26.1004	5		22.744	3.8341	1.71466	27.5047	17.9833	5
3.67	26.78	4.16345	1.86195	31.9496	21.6104	5		20.696	4.05967	1.81554	25.7367	15.6553	5
3.75	25.71	6.89143	3.08194	34.2668	17.1532	5		22.398	4.56498	2.04152	28.0662	16.7298	5
3.83	28.59	5.9481	2.66007	35.9755	21.2045	5		19.764	3.90288	1.74542	24.6101	14.9179	5
3.92	26.486	5.54387	2.47929	33.3696	19.6024	5		21.678	6.01557	2.69024	29.1473	14.2087	5
4	28.398	7.07064	3.16209	37.1774	19.6186	5		19.934	4.96938	2.22238	26.1043	13.7637	5
4.08	27.814	5.47751	2.44962	34.6152	21.0128	5		22.116	2.80946	1.25643	25.6044	18.6276	5
4.17	28.518	3.64767	1.63129	33.0472	23.9888	5		18.65	5.19028	2.32117	25.0946	12.2054	5
4.25	30.924	2.55603	1.14309	34.0977	27.7503	5		19.72	4.68631	2.09578	25.5388	13.9012	5
4.33	30.716	2.3053	1.03096	33.5784	27.8536	5		20.584	2.35123	1.0515	23.5034	17.6646	5
4.42	30.46	2.84971	1.27443	33.9984	26.9216	5		20.998	5.16158	2.30833	27.4069	14.5891	5
4.5	31.562	2.81439	1.25863	35.0565	28.0675	5		21.582	6.47628	2.89628	29.6234	13.5406	5
4.58	31.208	5.56537	2.48891	38.1183	24.2977	5		23.778	5.26657	2.35528	30.3173	17.2387	5
4.67	29.504	3.51009	1.56976	33.8624	25.1456	5		25.104	6.60112	2.95211	33.3004	16.9076	5
4.75	29.858	5.63074	2.51814	36.8495	22.8665	5		22.78	4.90672	2.19435	28.8725	16.6875	5
4.83	27.342	2.66008	1.18962	30.6449	24.0391	5		20.134	5.02949	2.24926	26.3789	13.8891	5
4.92	26.236	6.53978	2.92468	34.3562	18.1158	5		22.26	5.88285	2.63089	29.5645	14.9555	5
5	29.532	8.67803	3.88093	40.3072	18.7568	5		22.464	4.99396	2.23337	28.6648	16.2632	5
5.08	28.336	8.15533	3.64717	38.4622	18.2098	5		21.942	3.66797	1.64036	26.4964	17.3876	5
5.17	27.614	8.2732	3.69989	37.8865	17.3415	5		21.328	4.77694	2.13631	27.2593	15.3967	5
5.25	27.458	5.20173	2.32629	33.9168	20.9992	5		21.624	3.32429	1.48667	25.7517	17.4963	5
5.33	27.628	6.30209	2.81838	35.4531	19.8029	5		20.91	2.98905	1.33674	24.6214	17.1986	5
5.42	28.836	3.83251	1.71395	33.5947	24.0773	5		21.832	5.96759	2.66879	29.2417	14.4223	5
5.5	26.156	6.46111	2.8895	34.1785	18.1335	5		22.392	4.7124	2.10745	28.2432	16.5408	5
5.58	29.136	6.4436	2.88167	37.1368	21.1352	5		20.678	5.31679	2.37774	27.2797	14.0763	5
5.67	24.948	3.97496	1.77765	29.8836	20.0124	5		19.736	5.7639	2.57769	26.8928	12.5792	5
5.75	26.538	3.96221	1.77195	31.4577	21.6183	5		19.966	4.00944	1.79308	24.9444	14.9876	5
5.83	29.056	3.62547	1.62136	33.5576	24.5544	5		21.202	5.79765	2.59279	28.4007	14.0033	5
5.92	28.558	6.30115	2.81796	36.3819	20.7341	5		21.268	4.40927	1.97188	26.7428	15.7932	5
6	29.144	6.19654	2.77118	36.838	21.45	5		21.884	5.5489	2.48155	28.7739	14.9941	5
6.08	29.298	2.18947	0.97916	32.0166	26.5794	5		21.298	4.25218	1.90163	26.5778	16.0182	5
6.17	27.508	1.72983	0.773605	29.6559	25.3601	5		20.262	3.73539	1.67052	24.9001	15.6239	5
6.25	29.682	2.30657	1.03153	32.546	26.818	5		18.53	6.25338	2.7966	26.2946	10.7654	5
6.33	32.182	4.55071	2.03514	37.8325	26.5315	5		18.742	7.57488	3.38759	28.1475	9.33654	5
6.42	30.074	6.39357	2.85929	38.0127	22.1353	5		20.652	8.45712	3.78214	31.1529	10.1511	5
6.5	29.626	6.6409	2.9699	37.8718	21.3802	5		20.626	6.53684	2.92337	28.7426	12.5094	5
6.58	26.782	5.12765	2.29316	33.1488	20.4152	5		22.186	3.53359	1.58027	26.5735	17.7985	5
6.67	29.008	3.73545	1.67055	33.6462	24.3698	5		21.026	4.73488	2.1175	26.9051	15.1469	5
6.75	29.98	4.3253	1.93433	35.3506	24.6094	5		22.428	5.13972	2.29855	28.8098	16.0462	5
6.83	28.326	5.66403	2.53303	35.3588	21.2932	5		20.684	4.59369	2.05436	26.3878	14.9802	5
6.92	27.544	4.54634	2.03319	33.189	21.899	5		22.518	4.59543	2.05514	28.224	16.812	5
7	26.132	7.24656	3.24076	35.1298	17.1342	5		20.708	3.43009	1.53398	24.967	16.449	5
7.08	27.566	6.37359	2.85036	35.4799	19.6521	5		21.364	4.18782	1.87285	26.5639	16.1641	5
7.17	28.922	5.72097	2.55849	36.0255	21.8185	5		22.23	2.23732	1.00056	25.008	19.452	5
7.25	29.116	6.758	3.02227	37.5072	20.7248	5		21.696	5.70598	2.55179	28.7809	14.6111	5
7.33	26.442	8.64754	3.8673	37.1793	15.7047	5		21.842	4.47213	2	27.3949	16.2891	5
7.42	27.11	5.07786	2.27089	33.415	20.805	5		22.722	7.76479	3.47252	32.3633	13.0807	5
7.5	26.602	7.08891	3.17026	35.404	17.8	5		20.246	6.35474	2.84193	28.1365	12.3555	5
7.58	27.636	5.18238	2.31763	34.0708	21.2012	5		20.602	4.24269	1.89739	25.87	15.334	5
7.67	27.08	7.10182	3.17603	35.8981	18.2619	5		21.176	2.74946	1.2296	24.5899	17.7621	5
7.75	29.204	6.11426	2.73438	36.7959	21.6121	5		21.608	3.96352	1.77254	26.5294	16.6866	5
7.83	30.158	7.13232	3.18967	39.0139	21.3021	5		22.52	3.53029	1.57879	26.9034	18.1366	5
7.92	28.49	4.00168	1.78961	33.4587	23.5213	5		20.304	2.87702	1.28664	23.8763	16.7317	5
8	27.85	6.64626	2.9723	36.1024	19.5976	5		19.92	3.89278	1.7409	24.7535	15.0865	5
8.08	28.286	6.05548	2.70809	35.8049	20.7671	5		21.544	4.30758	1.92641	26.8926	16.1954	5
8.17	25.24	4.72774	2.11431	31.1103	19.3697	5		20.078	3.81626	1.70669	24.8165	15.3395	5
8.25	24.542	4.50864	2.01633	30.1402	18.9438	5		20.608	7.15061	3.19785	29.4867	11.7293	5
8.33	29.19	5.88474	2.63174	36.4969	21.8831	5		21.358	2.65837	1.18886	24.6588	18.0572	5
8.42	29.482	5.01893	2.24453	35.7138	23.2502	5		20.688	4.97033	2.2228	26.8595	14.5165	5
8.5	28.494	6.67103	2.98337	36.7772	20.2108	5		20.86	5.23626	2.34173	27.3617	14.3583	5
8.58	29.25	7.339	3.2821	38.3626	20.1374	5		19.944	5.23884	2.34288	26.4489	13.4391	5
8.67	30.708	7.75801	3.46949	40.3408	21.0752	5		20.152	4.23528	1.89407	25.4108	14.8932	5
8.75	29.31	6.03971	2.70104	36.8093	21.8107	5		19.392	4.71751	2.10973	25.2496	13.5344	5
8.83	29.812	5.89334	2.63558	37.1295	22.4945	5		22.092	4.82776	2.15904	28.0865	16.0975	5
8.92	25.424	4.68069	2.09327	31.2358	19.6122	5		21.642	2.99649	1.34007	25.3626	17.9214	5
9	29.42	3.90383	1.74585	34.2672	24.5728	5		24.198	4.91341	2.19734	30.2988	18.0972	5
9.08	28.198	5.86514	2.62297	35.4805	20.9155	5		22.102	4.74829	2.1235	27.9978	16.2062	5
9.17	28.952	1.99127	0.890525	31.4245	26.4795	5		21.832	6.4972	2.90564	29.8993	13.7647	5
9.25	31.37	5.06561	2.26541	37.6598	25.0802	5		23.178	6.46458	2.89105	31.2048	15.1512	5
9.33	29.556	4.08007	1.82466	34.6221	24.4899	5		21.844	5.34578	2.3907	28.4817	15.2063	5
9.42	28.006	6.95903	3.11217	36.6468	19.3652	5		24.35	4.60341	2.05871	30.0659	18.6341	5
9.5	27.228	4.14489	1.85365	32.3746	22.0814	5		21.124	5.04335	2.25545	27.3861	14.8619	5
9.58	27.308	5.22303	2.33581	33.7932	20.8228	5		23.108	3.48639	1.55916	27.4369	18.7791	5
9.67	28.568	3.98804	1.78351	33.5198	23.6162	5		25.124	7.57352	3.38698	34.5278	15.7202	5
9.75	28	7.94194	3.55174	37.8612	18.1388	5		24.354	5.96935	2.66957	31.7659	16.9421	5
9.83	27.53	6.88347	3.07838	36.077	18.983	5		23.528	4.84874	2.16842	29.5485	17.5075	5
9.92	28.42	6.09429	2.72545	35.9871	20.8529	5		22.614	5.15751	2.30651	29.0179	16.2101	5
10	25.01	5.90036	2.63872	32.3363	17.6837	5		22.602	4.67859	2.09233	28.4112	16.7928	5
10.08	27.306	4.63518	2.07291	33.0613	21.5507	5		21.412	4.26007	1.90516	26.7016	16.1224	5
10.17	28.962	8.10674	3.62545	39.0279	18.8961	5		21.202	6.2422	2.7916	28.9527	13.4513	5
10.25	28.978	6.96392	3.11436	37.6248	20.3312	5		20.314	6.33769	2.8343	28.1833	12.4447	5
10.33	27.314	5.70342	2.55065	34.3957	20.2323	5		21.614	5.02803	2.2486	27.8571	15.3709	5
10.42	29.912	6.1457	2.74844	37.5429	22.2811	5		21.582	4.7681	2.13236	27.5024	15.6616	5
10.5	28.282	5.47298	2.44759	35.0776	21.4864	5		20.672	5.71525	2.55594	27.7684	13.5756	5
10.58	29.88	3.55251	1.58873	34.291	25.469	5		21.628	5.00445	2.23806	27.8418	15.4142	5
10.67	30.284	2.82281	1.2624	33.789	26.779	5		22.4	4.79121	2.14269	28.3491	16.4509	5
10.75	29.034	3.34208	1.49462	33.1837	24.8843	5		22.148	3.82338	1.70987	26.8954	17.4006	5
10.83	28.506	3.56061	1.59235	32.9271	24.0849	5		22.792	4.18364	1.87098	27.9867	17.5973	5
10.92	27.44	1.87799	0.839863	29.7718	25.1082	5		23.584	6.72074	3.00561	31.9289	15.2391	5
11	27.36	6.89939	3.0855	35.9267	18.7933	5		24.164	5.32247	2.38028	30.7727	17.5553	5
11.08	25.618	7.38236	3.30149	34.7844	16.4516	5		25.918	4.8794	2.18213	31.9766	19.8594	5
11.17	26.876	7.72764	3.45591	36.4711	17.2809	5		21.474	4.97834	2.22638	27.6554	15.2926	5
11.25	26.882	3.44034	1.53857	31.1537	22.6103	5		21.032	3.3708	1.50747	25.2174	16.8466	5
11.33	25.978	7.30559	3.26716	35.0491	16.9069	5		20.404	2.92867	1.30974	24.0404	16.7676	5
11.42	27.26	9.04772	4.04626	38.4942	16.0258	5		21.354	3.35284	1.49944	25.5171	17.1909	5
11.5	27.174	8.72053	3.89994	38.002	16.346	5		20.926	4.73801	2.1189	26.809	15.043	5
11.58	26.436	5.46876	2.4457	33.2264	19.6456	5		19.324	5.20802	2.3291	25.7906	12.8574	5
11.67	27.99	4.89156	2.18757	34.0637	21.9163	5		19.728	5.49417	2.45707	26.5499	12.9061	5
11.75	27.604	4.39607	1.96598	33.0624	22.1456	5		20.076	2.30266	1.02978	22.9351	17.2169	5
11.83	28.244	4.72442	2.11282	34.1101	22.3779	5		18.792	3.31181	1.48109	22.9042	14.6798	5
11.92	29.498	6.98151	3.12223	38.1667	20.8293	5		17.876	3.99915	1.78848	22.8416	12.9104	5
12	27.158	5.85872	2.6201	34.4326	19.8834	5		20.206	5.9243	2.64943	27.562	12.85	5
12.08	26.062	5.26167	2.35309	32.5952	19.5288	5		20.308	3.75136	1.67766	24.9659	15.6501	5
12.17	29.578	4.2494	1.90039	34.8543	24.3017	5		18.618	3.42842	1.53324	22.8749	14.3611	5
12.25	29.732	5.11929	2.28942	36.0884	23.3756	5		19.262	4.72089	2.11124	25.1238	13.4002	5
12.33	31.034	5.27447	2.35882	37.5831	24.4849	5		19.24	5.81918	2.60242	26.4655	12.0145	5
12.42	29.362	5.87189	2.62599	36.6529	22.0711	5		18.578	6.27876	2.80794	26.3741	10.7819	5
12.5	28.564	4.45266	1.99129	34.0927	23.0353	5		20.394	5.37454	2.40357	27.0674	13.7206	5
12.58	27.93	4.25406	1.90247	33.2121	22.6479	5		22.216	6.11188	2.73332	29.8049	14.6271	5
12.67	25.192	2.35533	1.05333	28.1165	22.2675	5		21.99	6.434	2.87737	29.9789	14.0011	5
12.75	26.15	2.13877	0.956488	28.8056	23.4944	5		20.202	4.03746	1.80561	25.2152	15.1888	5
12.83	28.202	5.88073	2.62994	35.5039	20.9001	5		19.518	7.00549	3.13295	28.2165	10.8195	5
12.92	27.018	4.54034	2.0305	32.6556	21.3804	5		18.536	6.0402	2.70126	26.0359	11.0361	5
13	26.102	5.93942	2.65619	33.4768	18.7272	5		17.158	4.67129	2.08906	22.9582	11.3578	5
13.08	23.836	4.66142	2.08465	29.6239	18.0481	5		18.72	6.83364	3.0561	27.2051	10.2349	5
13.17	26.292	4.84417	2.16638	32.3068	20.2772	5		18.824	4.28855	1.9179	24.1489	13.4991	5
13.25	24.992	5.85661	2.61916	32.2639	17.7201	5		16.682	4.75952	2.12852	22.5917	10.7723	5
13.33	27.206	5.22844	2.33823	33.698	20.714	5		17.83	4.35314	1.94678	23.2351	12.4249	5
13.42	27.302	7.03129	3.14449	36.0325	18.5715	5		18.406	4.946	2.21192	24.5473	12.2647	5
13.5	27.89	6.36485	2.84645	35.793	19.987	5		17.022	4.67227	2.0895	22.8234	11.2206	5
13.58	24.31	5.6127	2.51008	31.2791	17.3409	5		16.294	4.83923	2.16417	22.3027	10.2853	5
13.67	24.534	4.84192	2.16537	30.546	18.522	5		17.028	5.76048	2.57617	24.1806	9.87542	5
13.75	24.542	5.8585	2.62	31.8163	17.2677	5		17.134	4.40921	1.97186	22.6088	11.6592	5
13.83	25.7	4.5507	2.03513	31.3504	20.0496	5		17.104	3.62062	1.61919	21.5996	12.6084	5
13.92	25.484	5.90094	2.63898	32.811	18.157	5		18.564	5.76065	2.57624	25.7168	11.4112	5
14	23.96	4.58584	2.05085	29.6541	18.2659	5		18.504	6.36274	2.8455	26.4044	10.6036	5
14.08	24.288	2.39778	1.07232	27.2652	21.3108	5		19.312	2.25891	1.01021	22.1168	16.5072	5
14.17	26.318	4.21401	1.88456	31.5504	21.0856	5		18.136	4.84537	2.16692	24.1523	12.1197	5
14.25	27.804	2.4146	1.07984	30.8021	24.8059	5		18.078	3.4316	1.53466	22.3389	13.8171	5
14.33	29.256	4.6233	2.0676	34.9966	23.5154	5		17.192	5.79847	2.59316	24.3918	9.99225	5
14.42	25.53	2.15223	0.962507	28.2023	22.8577	5		19.742	4.36405	1.95166	25.1607	14.3233	5
14.5	24.586	5.11819	2.28892	30.9411	18.2309	5		22.584	7.39515	3.30721	31.7663	13.4017	5
14.58	25.21	5.23603	2.34163	31.7114	18.7086	5		21.95	6.31387	2.82365	29.7897	14.1103	5
14.67	24.796	4.3083	1.92673	30.1455	19.4465	5		19.902	6.7062	2.9991	28.2288	11.5752	5
14.75	24.636	6.12408	2.73877	32.24	17.032	5		21.188	4.73597	2.11799	27.0685	15.3075	5
14.83	24.124	3.4124	1.52607	28.3611	19.8869	5		21.47	5.45503	2.43956	28.2433	14.6967	5
14.92	24.562	5.24606	2.34611	31.0758	18.0482	5		19.846	4.43367	1.9828	25.3511	14.3409	5
15	23.65	3.63072	1.62371	28.1581	19.1419	5		19.874	4.14249	1.85258	25.0176	14.7304	5
15.08	26.376	3.5726	1.59772	30.812	21.94	5		18.87	3.64382	1.62957	23.3944	14.3456	5
15.17	26.466	4.51337	2.01844	32.0701	20.8619	5		21.026	5.10955	2.28506	27.3703	14.6817	5
15.25	26.076	5.24392	2.34515	32.5872	19.5648	5		20.832	5.7155	2.55605	27.9287	13.7353	5
15.33	25.656	6.20051	2.77295	33.355	17.957	5		20.288	4.41551	1.97468	25.7706	14.8054	5
15.42	25.78	4.7909	2.14256	31.7287	19.8313	5		20.362	4.1714	1.86551	25.5415	15.1825	5
15.5	26.308	4.8388	2.16398	32.3162	20.2998	5		18.498	4.4311	1.98165	23.9999	12.9961	5
15.58	26.874	5.00099	2.23651	33.0836	20.6644	5		19.252	4.45544	1.99253	24.7842	13.7198	5
15.67	25.662	6.25169	2.79584	33.4245	17.8995	5		18.198	3.13379	1.40148	22.0891	14.3069	5
15.75	23.01	5.10829	2.2845	29.3528	16.6672	5		18.574	4.87369	2.17958	24.6255	12.5225	5
15.83	23.816	4.88975	2.18676	29.8874	17.7446	5		18.552	3.66644	1.63968	23.1045	13.9995	5
15.92	23.858	5.37154	2.40222	30.5276	17.1884	5		19.862	5.44432	2.43478	26.622	13.102	5
16	24.91	4.11259	1.83921	30.0165	19.8035	5		16.97	4.57598	2.04644	22.6518	11.2882	5
16.08	25.034	4.22558	1.88974	30.2808	19.7872	5		17.252	3.94562	1.76454	22.1511	12.3529	5
16.17	25.824	3.54978	1.58751	30.2316	21.4164	5		18.37	5.52787	2.47214	25.2338	11.5062	5
16.25	24.084	5.1949	2.32323	30.5343	17.6337	5		17.21	4.49292	2.0093	22.7887	11.6313	5
16.33	25.15	3.77449	1.688	29.8366	20.4634	5		17.794	4.12289	1.84381	22.9132	12.6748	5
16.42	26.43	2.58164	1.15454	29.6355	23.2245	5		17.372	3.01663	1.34908	21.1176	13.6264	5
16.5	24.528	5.36459	2.39912	31.189	17.867	5		18.212	4.76865	2.13261	24.1331	12.2909	5
16.58	25.162	4.6555	2.082	30.9426	19.3814	5		16.926	3.10246	1.38746	20.7782	13.0738	5
16.67	27.374	4.14912	1.85554	32.5258	22.2222	5		18.838	1.76851	0.790901	21.0339	16.6421	5
16.75	27.028	5.03866	2.25336	33.2843	20.7717	5		18.496	2.35157	1.05165	21.4159	15.5761	5
16.83	23.236	2.4097	1.07765	26.228	20.244	5		18.756	2.02157	0.904072	21.2661	16.2459	5
16.92	25.328	5.18232	2.31761	31.7627	18.8933	5		18.716	1.88659	0.84371	21.0585	16.3735	5
17	23.942	4.04232	1.80778	28.9612	18.9228	5		17.604	4.7051	2.10419	23.4462	11.7618	5
17.08	27.79	3.71385	1.66088	32.4013	23.1787	5		17.572	1.36273	0.609429	19.264	15.88	5
17.17	26.858	5.48498	2.45296	33.6685	20.0475	5		17.004	2.17676	0.973476	19.7068	14.3012	5
17.25	28.562	3.71016	1.65924	33.1688	23.9552	5		16.322	2.5902	1.15837	19.5382	13.1058	5
17.33	24.396	4.47933	2.00322	29.9578	18.8342	5		22.046	5.14703	2.30182	28.4369	15.6551	5
17.42	24.49	5.81613	2.60105	31.7117	17.2683	5		19.88	5.00502	2.23831	26.0946	13.6654	5
17.5	24.656	2.78748	1.2466	28.1171	21.1949	5		20.328	5.65199	2.52765	27.3459	13.3101	5
17.58	25.16	1.64554	0.735908	27.2032	23.1168	5		19.726	6.27269	2.80523	27.5146	11.9374	5
17.67	24.628	5.09414	2.27817	30.9532	18.3028	5		19.192	8.28336	3.70443	29.4771	8.90685	5
17.75	24.534	5.76998	2.58041	31.6984	17.3696	5		17.976	4.67405	2.0903	23.7796	12.1724	5
17.83	28.032	3.86462	1.72831	32.8306	23.2334	5		19.556	6.86858	3.07172	28.0845	11.0275	5
17.92	28.27	4.73813	2.11896	34.1532	22.3868	5		18.078	6.06563	2.71263	25.6095	10.5465	5
18	27.222	5.01544	2.24297	33.4495	20.9945	5		17.352	6.21845	2.78098	25.0732	9.63077	5
18.08	26.614	2.74848	1.22916	30.0267	23.2013	5		17.516	4.6575	2.0829	23.2991	11.7329	5
18.17	24.21	4.18525	1.8717	29.4067	19.0133	5		19.27	6.14792	2.74943	26.9036	11.6364	5
18.25	24.256	2.92098	1.3063	27.8829	20.6291	5		18.658	5.80447	2.59584	25.8652	11.4508	5
18.33	26.232	3.77124	1.68655	30.9146	21.5494	5		17.72	5.39533	2.41287	24.4192	11.0208	5
18.42	26.046	4.09437	1.83106	31.1298	20.9622	5		19.402	6.08698	2.72218	26.96	11.844	5
18.5	27.172	4.71676	2.1094	33.0286	21.3154	5		20.52	5.71596	2.55626	27.6173	13.4227	5
18.58	27.158	5.67313	2.5371	34.2021	20.1139	5		18.818	5.04359	2.25556	25.0804	12.5556	5
18.67	28.936	3.46894	1.55136	33.2433	24.6287	5		19.106	1.75234	0.783668	21.2818	16.9302	5
18.75	27.08	3.93929	1.7617	31.9713	22.1887	5		18.298	3.06893	1.37247	22.1086	14.4874	5
18.83	26.752	4.1659	1.86305	31.9246	21.5794	5		18.32	6.03781	2.70019	25.8169	10.8231	5
18.92	26.784	5.09888	2.28029	33.1151	20.4529	5		19.004	4.80561	2.14914	24.971	13.037	5
19	26.77	4.60817	2.06084	32.4918	21.0482	5		21.602	3.75557	1.67954	26.2652	16.9388	5
19.08	27.956	6.60476	2.95374	36.1569	19.7551	5		18.162	2.95146	1.31993	21.8267	14.4973	5
19.17	27.04	4.87807	2.18154	33.0969	20.9831	5		18.992	3.14435	1.40619	22.8962	15.0878	5
19.25	26.724	4.74741	2.12311	32.6187	20.8293	5		18.566	3.15817	1.41238	22.4874	14.6446	5
19.33	25.51	3.58944	1.60524	29.9669	21.0531	5		19.87	3.68946	1.64998	24.4511	15.2889	5
19.42	24.89	4.6528	2.0808	30.6672	19.1128	5		20.668	4.1076	1.83697	25.7683	15.5677	5
19.5	26.83	5.23471	2.34103	33.3298	20.3302	5		19.756	3.82909	1.71242	24.5104	15.0016	5
19.58	27.116	2.91298	1.30272	30.7329	23.4991	5		19.076	3.3268	1.48779	23.2068	14.9452	5
19.67	24.95	4.96894	2.22218	31.1198	18.7802	5		19.93	6.08816	2.72271	27.4895	12.3705	5
19.75	25.458	5.31594	2.37736	32.0586	18.8574	5		17.366	3.94304	1.76338	22.2619	12.4701	5
19.83	26.166	3.59485	1.60766	30.6296	21.7024	5		18.896	4.44045	1.98583	24.4096	13.3824	5
19.92	26.032	4.98644	2.23001	32.2235	19.8405	5		22.008	6.00969	2.68762	29.47	14.546	5
20	25.712	3.76284	1.68279	30.3842	21.0398	5		19.418	3.48732	1.55958	23.7481	15.0879	5
20.08	26.288	4.24483	1.89835	31.5587	21.0173	5		19.352	4.75122	2.12481	25.2514	13.4526	5
20.17	24.682	3.90239	1.7452	29.5275	19.8365	5		17.798	4.25416	1.90252	23.0802	12.5158	5
20.25	25.032	3.56208	1.59301	29.4549	20.6091	5		16.884	4.37032	1.95447	22.3105	11.4575	5
20.33	27.246	5.56362	2.48812	34.1541	20.3379	5		19.068	5.85714	2.61939	26.3406	11.7954	5
20.42	25.876	5.42411	2.42573	32.6109	19.1411	5		17.538	5.48613	2.45347	24.3499	10.7261	5
20.5	27.256	5.37895	2.40554	33.9349	20.5771	5		20.678	6.73245	3.01084	29.0374	12.3186	5
20.58	26.338	2.7799	1.24321	29.7897	22.8863	5		18.436	3.77693	1.68909	23.1257	13.7463	5
20.67	25.576	3.22908	1.44409	29.5854	21.5666	5		19.154	5.1633	2.3091	25.5651	12.7429	5
20.75	27.988	6.35706	2.84296	35.8813	20.0947	5		21.078	3.61008	1.61448	25.5605	16.5955	5
20.83	28.496	5.99481	2.68096	35.9395	21.0525	5		21.908	4.12698	1.84564	27.0323	16.7837	5
20.92	27.226	4.49755	2.01137	32.8104	21.6416	5		20.16	4.21098	1.88321	25.3886	14.9314	5
21	25.85	3.71769	1.6626	30.4661	21.2339	5		19.07	2.50001	1.11804	22.1742	15.9658	5
21.08	26.974	2.76876	1.23823	30.4119	23.5361	5		20.736	3.87178	1.73151	25.5434	15.9286	5
21.17	25.74	3.58636	1.60387	30.1931	21.2869	5		17.058	2.95825	1.32297	20.7312	13.3848	5
21.25	25.368	2.58604	1.15651	28.579	22.157	5		18.896	5.12757	2.29312	25.2627	12.5293	5
21.33	23.692	4.39706	1.96643	29.1517	18.2323	5		17.022	3.39691	1.51914	21.2398	12.8042	5
21.42	25.878	2.40834	1.07704	28.8684	22.8876	5		17.758	4.02079	1.79815	22.7505	12.7655	5
21.5	27.35	2.92459	1.30792	30.9814	23.7186	5		19.794	6.05723	2.70888	27.315	12.273	5
21.58	27.154	3.10113	1.38687	31.0046	23.3034	5		20.434	4.60863	2.06104	26.1564	14.7116	5
21.67	28.26	3.78353	1.69205	32.9579	23.5621	5		20.912	6.22691	2.78476	28.6437	13.1803	5
21.75	28.248	3.31734	1.48356	32.367	24.129	5		19.484	3.82586	1.71098	24.2344	14.7336	5
21.83	28.05	1.61558	0.72251	30.056	26.044	5		19.428	5.11204	2.28617	25.7754	13.0806	5
21.92	25.28	3.45078	1.54323	29.5647	20.9953	5		19.558	3.10289	1.38765	23.4107	15.7053	5
22	25.754	5.03955	2.25376	32.0114	19.4966	5		18.878	4.22699	1.89037	24.1265	13.6295	5
22.08	25.772	4.55069	2.03513	31.4224	20.1216	5		18.282	4.14991	1.8559	23.4348	13.1292	5
22.17	26.28	5.27058	2.35708	32.8243	19.7357	5		21.808	5.71216	2.55455	28.9006	14.7154	5
22.25	28.514	7.47076	3.34102	37.7902	19.2378	5		18.606	2.73544	1.22333	22.0025	15.2095	5
22.33	29.29	6.07935	2.71877	36.8385	21.7415	5		19.126	4.01087	1.79372	24.1062	14.1458	5
22.42	27.034	5.09802	2.2799	33.364	20.704	5		18.602	4.63842	2.07437	24.3614	12.8426	5
22.5	25.45	3.15787	1.41224	29.371	21.529	5		19.492	3.98376	1.78159	24.4385	14.5455	5
22.58	28.35	2.61889	1.1712	31.6018	25.0982	5		20.23	3.64731	1.63113	24.7587	15.7013	5
22.67	24.928	4.10092	1.83399	30.02	19.836	5		21.29	4.34843	1.94468	26.6893	15.8907	5
22.75	25.098	3.26193	1.45878	29.1482	21.0478	5		19.116	1.01663	0.454649	20.3783	17.8537	5
22.83	27.452	3.53684	1.58173	31.8436	23.0604	5		20.302	4.1692	1.86452	25.4787	15.1253	5
22.92	27.276	3.98999	1.78438	32.2302	22.3218	5		19.832	3.38396	1.51335	24.0337	15.6303	5
23	28.492	5.53543	2.47552	35.3651	21.6189	5		22.326	5.66768	2.53466	29.3634	15.2886	5
23.08	28.47	7.08934	3.17045	37.2726	19.6674	5		21.396	6.36715	2.84748	29.3019	13.4901	5
23.17	28.812	4.28538	1.91648	34.133	23.491	5		18.664	6.394	2.85948	26.6032	10.7248	5
23.25	26.548	5.20073	2.32584	33.0056	20.0904	5		18.104	5.07376	2.26906	24.4039	11.8041	5
23.33	28.514	4.67555	2.09097	34.3195	22.7085	5		20.752	3.7492	1.67669	25.4072	16.0968	5
23.42	27.854	5.89054	2.63433	35.1681	20.5399	5		20.556	2.80466	1.25428	24.0384	17.0736	5
23.5	27.66	2.46676	1.10317	30.7229	24.5971	5		19.788	2.6722	1.19505	23.106	16.47	5
23.58	25.24	2.96767	1.32718	28.9248	21.5552	5		18.098	4.23262	1.89289	23.3535	12.8425	5
23.67	27.738	4.05006	1.81124	32.7668	22.7092	5		17.43	6.87349	3.07392	25.9646	8.89544	5
23.75	27.156	3.50361	1.56686	31.5063	22.8057	5		16.702	6.43298	2.87691	24.6896	8.71441	5
23.83	27.39	2.67663	1.19703	30.7135	24.0665	5		21.704	3.08037	1.37758	25.5288	17.8792	5
23.92	30.59	6.69993	2.9963	38.9091	22.2709	5		19.776	6.00253	2.68441	27.2291	12.3229	5
24	29.152	1.52986	0.684174	31.0516	27.2524	5		19.838	4.19859	1.87767	25.0512	14.6248	5
24.08	29.108	3.60742	1.61329	33.5872	24.6288	5		19.474	3.12409	1.39713	23.3531	15.5949	5
24.17	28.866	2.97303	1.32958	32.5575	25.1745	5		18.436	5.39936	2.41467	25.1402	11.7318	5
24.25	27.668	2.23248	0.998396	30.44	24.896	5		21.034	3.51745	1.57305	25.4015	16.6665	5
24.33	26.392	4.06232	1.81672	31.436	21.348	5		19.028	3.6371	1.62656	23.5441	14.5119	5
24.42	27.294	3.42803	1.53306	31.5505	23.0375	5		19.672	4.44033	1.98578	25.1854	14.1586	5
24.5	28.832	4.37028	1.95445	34.2584	23.4056	5		18.144	2.01031	0.899036	20.6401	15.6479	5
24.58	26.734	5.43411	2.43021	33.4813	19.9867	5		18.49	3.30744	1.47913	22.5967	14.3833	5
24.67	24.628	5.46085	2.44217	31.4085	17.8475	5		19.78	3.5653	1.59445	24.2069	15.3531	5
24.75	26.572	5.68849	2.54397	33.6352	19.5088	5		20.014	3.83124	1.71338	24.7711	15.2569	5
24.83	25.5	7.75786	3.46942	35.1327	15.8673	5		21.648	7.21301	3.22576	30.6041	12.6919	5
24.92	24.048	5.62114	2.51385	31.0276	17.0684	5		19.268	2.90193	1.29778	22.8712	15.6648	5
25	23.746	3.05747	1.36734	27.5424	19.9496	5		19.144	4.92842	2.20405	25.2634	13.0246	5
25.08	28.774	5.84696	2.61484	36.034	21.514	5		17.742	6.50695	2.91	25.8214	9.66256	5
25.17	27.878	4.63784	2.07411	33.6366	22.1194	5		21.432	5.97433	2.6718	28.8501	14.0139	5
25.25	29.522	4.34216	1.94187	34.9135	24.1305	5		22.152	5.04597	2.25663	28.4174	15.8866	5
25.33	28.614	5.40872	2.41885	35.3298	21.8982	5		20.612	7.12366	3.1858	29.4572	11.7668	5
25.42	28.27	4.49716	2.01119	33.854	22.686	5		20.73	5.74589	2.56964	27.8645	13.5955	5
25.5	30.146	4.86686	2.17653	36.189	24.103	5		20.062	8.03506	3.59339	30.0388	10.0852	5
25.58	30.954	5.18143	2.3172	37.3876	24.5204	5		19.93	6.30079	2.8178	27.7535	12.1065	5
25.67	29.99	4.03277	1.80351	34.9973	24.9827	5		19.588	5.21747	2.33332	26.0663	13.1097	5
25.75	28.582	3.85414	1.72362	33.3675	23.7965	5		20.73	4.74328	2.12126	26.6196	14.8404	5
25.83	29.118	3.26163	1.45864	33.1678	25.0682	5		21.17	4.45242	1.99118	26.6984	15.6416	5
25.92	28.534	3.22727	1.44328	32.5412	24.5268	5		18.546	5.65571	2.52931	25.5685	11.5235	5
26	28.282	3.21976	1.43992	32.2799	24.2841	5		19.822	5.51007	2.46418	26.6637	12.9803	5
26.08	27.95	5.88665	2.63259	35.2592	20.6408	5		20.148	4.42865	1.98055	25.6469	14.6491	5
26.17	27.142	3.73189	1.66895	31.7757	22.5083	5		18.66	3.8372	1.71605	23.4245	13.8955	5
26.25	26.64	6.00296	2.68461	34.0937	19.1863	5		19.048	5.43585	2.43099	25.7975	12.2985	5
26.33	25.662	5.97356	2.67146	33.0791	18.2449	5		18.926	7.36404	3.2933	28.0697	9.78234	5
26.42	25.154	5.44957	2.43712	31.9205	18.3875	5		19.728	6.13173	2.74219	27.3415	12.1145	5
26.5	25.242	5.87783	2.62865	32.5403	17.9437	5		19.88	5.92014	2.64756	27.2308	12.5292	5
26.58	25.392	5.0355	2.25194	31.6444	19.1396	5		20.586	2.16449	0.967991	23.2736	17.8984	5
26.67	25.544	5.29007	2.36579	32.1125	18.9755	5		16.902	4.66105	2.08448	22.6895	11.1145	5
26.75	26.476	5.19531	2.32341	32.9268	20.0252	5		18.512	3.81752	1.70725	23.2521	13.7719	5
26.83	28.462	2.76669	1.2373	31.8973	25.0267	5		18.048	3.00983	1.34604	21.7852	14.3108	5
26.92	28.54	4.38865	1.96266	33.9892	23.0908	5		17.094	1.95942	0.87628	19.5269	14.6611	5
27	29.256	3.56131	1.59267	33.678	24.834	5		18.586	6.57694	2.9413	26.7524	10.4196	5
27.08	28.196	4.98593	2.22978	34.3869	22.0051	5		18.714	7.56729	3.38419	28.11	9.31797	5
27.17	28.506	3.37427	1.50902	32.6957	24.3163	5		20.15	6.45825	2.88822	28.169	12.131	5
27.25	26.952	3.09153	1.38258	30.7906	23.1134	5		20.714	6.68481	2.98954	29.0143	12.4137	5
27.33	24.854	3.15549	1.41118	28.7721	20.9359	5		21.846	6.91421	3.09213	30.4311	13.2609	5
27.42	27.864	5.31678	2.37774	34.4657	21.2623	5		19.694	6.81319	3.04695	28.1537	11.2343	5
27.5	26.798	4.58471	2.05034	32.4907	21.1053	5		21.194	6.07276	2.71582	28.7343	13.6537	5
27.58	26.926	4.33113	1.93694	32.3038	21.5482	5		21.818	3.88401	1.73698	26.6406	16.9954	5
27.67	27.092	3.42571	1.53202	31.3456	22.8384	5		20.802	4.85425	2.17089	26.8293	14.7747	5
27.75	27.904	3.94622	1.7648	32.8039	23.0041	5		20.662	4.73434	2.11726	26.5405	14.7835	5
27.83	28.304	3.3987	1.51994	32.524	24.084	5		18.932	3.39608	1.51877	23.1488	14.7152	5
27.92	28.494	2.60641	1.16562	31.7303	25.2577	5		18.658	7.20495	3.22215	27.6041	9.71188	5
28	29.02	3.31063	1.48056	33.1307	24.9093	5		20.596	5.54254	2.4787	27.478	13.714	5
28.08	27.538	5.56885	2.49046	34.4526	20.6234	5		20.61	4.87212	2.17888	26.6595	14.5605	5
28.17	26.592	6.32253	2.82752	34.4425	18.7415	5		19.974	4.94579	2.21183	26.115	13.833	5
28.25	26.402	5.30325	2.37169	32.9869	19.8171	5		19.61	6.56495	2.93594	27.7615	11.4585	5
28.33	25.444	6.26173	2.80033	33.219	17.669	5		18.742	4.7638	2.13044	24.657	12.827	5
28.42	25.638	6.03193	2.69756	33.1276	18.1484	5		19.428	3.84818	1.72096	24.2061	14.6499	5
28.5	27.426	5.47761	2.44966	34.2274	20.6246	5		22.016	4.1609	1.86081	27.1824	16.8496	5
28.58	27.704	2.92586	1.30848	31.3369	24.0711	5		20.072	6.5808	2.94302	28.2431	11.9009	5
28.67	26.314	4.90842	2.19511	32.4086	20.2194	5		20.596	3.49565	1.5633	24.9364	16.2556	5
28.75	28.764	5.38794	2.40956	35.454	22.074	5		20.914	5.74787	2.57053	28.0509	13.7771	5
28.83	30.094	2.92657	1.3088	33.7278	26.4602	5		19.646	6.0832	2.72049	27.1993	12.0927	5
28.92	29.604	5.14264	2.29986	35.9894	23.2186	5		19.596	6.11937	2.73667	27.1942	11.9978	5
29	27.352	3.73419	1.66998	31.9886	22.7154	5		19.622	7.32361	3.27522	28.7155	10.5285	5
29.08	29.67	2.52281	1.12823	32.8025	26.5375	5		19.426	8.07795	3.61257	29.4561	9.3959	5
29.17	27.368	2.60822	1.16643	30.6065	24.1295	5		19.542	7.2792	3.25536	28.5803	10.5037	5
29.25	28.878	2.73292	1.2222	32.2714	25.4846	5		20.75	8.63583	3.86206	31.4728	10.0272	5
29.33	28.964	2.21651	0.991255	31.7162	26.2118	5		20.712	7.87877	3.52349	30.4948	10.9292	5
29.42	31.374	3.43324	1.53539	35.6369	27.1111	5		19.63	6.9196	3.09454	28.2218	11.0382	5
29.5	27.372	1.95088	0.872459	29.7943	24.9497	5		19.45	7.71326	3.44948	29.0273	9.87272	5
29.58	28.356	2.14636	0.959883	31.0211	25.6909	5		19.36	7.53748	3.37086	28.719	10.001	5
29.67	27.4	2.48206	1.11001	30.4819	24.3181	5		20.48	6.77446	3.02963	28.8916	12.0684	5
29.75	25.844	5.92515	2.64981	33.201	18.487	5		23.39	4.8682	2.17712	29.4347	17.3453	5
29.83	27.078	5.83085	2.60763	34.318	19.838	5		21.404	7.06784	3.16083	30.1799	12.6281	5
29.92	28.648	7.14883	3.19705	37.5244	19.7716	5		23.162	7.2215	3.22955	32.1287	14.1953	5
30	26.636	6.08604	2.72176	34.1928	19.0792	5		20.464	6.20472	2.77483	28.1682	12.7598	5
30.08	27.408	6.16188	2.75568	35.059	19.757	5		19.796	5.0067	2.23906	26.0126	13.5794	5
30.17	27.844	6.34814	2.83898	35.7263	19.9617	5		20.758	5.25965	2.35218	27.2887	14.2273	5
30.25	28.386	4.41866	1.97608	33.8725	22.8995	5		20.018	6.25821	2.79876	27.7886	12.2474	5
30.33	26.45	5.9056	2.64106	33.7828	19.1172	5		21.712	6.04445	2.70316	29.2172	14.2068	5
30.42	26.672	6.06896	2.71412	34.2076	19.1364	5		20.112	6.67368	2.98456	28.3985	11.8255	5
30.5	28.666	6.77482	3.02979	37.078	20.254	5		21.07	5.43853	2.43219	27.8228	14.3172	5
30.58	27.672	4.65047	2.07975	33.4463	21.8977	5		19.726	2.98307	1.33407	23.43	16.022	5
30.67	28.586	7.16754	3.20542	37.4857	19.6863	5		20.496	6.52545	2.91827	28.5984	12.3936	5
30.75	27.438	7.90544	3.53542	37.2539	17.6221	5		19.974	6.72423	3.00717	28.3232	11.6248	5
30.83	28.436	4.91143	2.19646	34.5343	22.3377	5		20.096	6.97298	3.11841	28.7541	11.4379	5
30.92	30.996	4.49526	2.01034	36.5776	25.4144	5		18.984	7.07482	3.16396	27.7686	10.1994	5
31	28.598	4.66679	2.08705	34.3926	22.8034	5		21.384	8.62777	3.85845	32.0968	10.6712	5
31.08	28.854	7.35296	3.28834	37.9839	19.7241	5		18.744	6.86619	3.07065	27.2695	10.2185	5
31.17	25.626	5.53156	2.47379	32.4943	18.7577	5		19.39	5.36667	2.40005	26.0536	12.7264	5
31.25	26.452	5.34744	2.39145	33.0917	19.8123	5		20.928	4.98729	2.23038	27.1205	14.7355	5
31.33	28.234	8.37314	3.74458	38.6306	17.8374	5		19.96	8.43373	3.77168	30.4319	9.48814	5
31.42	25.812	5.07927	2.27152	32.1188	19.5052	5		21.06	7.69704	3.44222	30.6171	11.5029	5
31.5	26.336	6.36663	2.84724	34.2412	18.4308	5		21.198	6.56274	2.93495	29.3467	13.0493	5
31.58	27.926	7.02196	3.14031	36.6449	19.2071	5		19.382	5.06341	2.26443	25.6691	13.0949	5
31.67	23.266	4.40536	1.97014	28.736	17.796	5		17.932	6.37621	2.85153	25.8491	10.0149	5
31.75	24.918	3.58203	1.60193	29.3657	20.4703	5		18.854	6.67271	2.98413	27.1393	10.5687	5
31.83	27.756	4.08002	1.82464	32.822	22.69	5		19.778	4.00323	1.7903	24.7487	14.8073	5
31.92	27.79	7.01692	3.13806	36.5027	19.0773	5		21.546	6.66784	2.98195	29.8252	13.2668	5
32	26.724	7.22273	3.2301	35.6922	17.7558	5		19.994	5.96523	2.66773	27.4008	12.5872	5
32.08	28.408	6.24903	2.79465	36.1672	20.6488	5		19.448	7.018	3.13855	28.162	10.734	5
32.17	29.018	7.36275	3.29272	38.1601	19.8759	5		21.306	8.46406	3.78524	31.8155	10.7965	5
32.25	31.248	4.52585	2.02402	36.8676	25.6284	5		21.288	8.86063	3.9626	32.2899	10.2861	5
32.33	29.482	5.26216	2.35331	36.0158	22.9482	5		23.982	8.33074	3.72562	34.326	13.638	5
32.42	29.234	3.24321	1.45041	33.261	25.207	5		19.526	6.37353	2.85033	27.4398	11.6122	5
32.5	29.81	4.79562	2.14467	35.7646	23.8554	5		23.044	6.58928	2.94682	31.2257	14.8623	5
32.58	28.466	5.55104	2.4825	35.3585	21.5735	5		21.178	7.60751	3.40218	30.624	11.732	5
32.67	27.196	6.51717	2.91457	35.2881	19.1039	5		19.898	5.55545	2.48447	26.796	13	5
32.75	27.792	7.3644	3.29346	36.9361	18.6479	5		21.032	7.60833	3.40255	30.479	11.585	5
32.83	28.638	7.62338	3.40928	38.1037	19.1723	5		19.892	6.21796	2.78075	27.6126	12.1714	5
32.92	31.448	4.65278	2.08078	37.2252	25.6708	5		20.478	6.10015	2.72807	28.0523	12.9037	5
33	31.208	4.47852	2.00286	36.7688	25.6472	5		20.488	6.26462	2.80162	28.2666	12.7094	5
33.08	27.596	6.64751	2.97286	35.85	19.342	5		18.622	5.35961	2.39689	25.2768	11.9672	5
33.17	30.432	5.80354	2.59542	37.638	23.226	5		18.808	4.64294	2.07638	24.573	13.043	5
33.25	29.06	3.97569	1.77798	33.9965	24.1235	5		21.464	4.52607	2.02412	27.0839	15.8441	5
33.33	28.082	1.59512	0.713361	30.0626	26.1014	5		21.15	4.72112	2.11135	27.012	15.288	5
33.42	27.382	3.15942	1.41293	31.3049	23.4591	5		23.204	5.75886	2.57544	30.3546	16.0534	5
33.5	24.824	3.9444	1.76399	29.7216	19.9264	5		22.162	4.48763	2.00693	27.7341	16.5899	5
33.58	23.512	4.86489	2.17564	29.5526	17.4714	5		19.72	6.82149	3.05066	28.19	11.25	5
33.67	25.644	5.64691	2.52537	32.6556	18.6324	5		21.068	5.85129	2.61678	28.3333	13.8027	5
33.75	30.616	5.33162	2.38437	37.2361	23.9959	5		20.414	3.15389	1.41046	24.3301	16.4979	5
33.83	26.5	3.3211	1.48524	30.6237	22.3763	5		19.802	7.53349	3.36908	29.1561	10.4479	5
33.92	27.474	5.03616	2.25224	33.7272	21.2208	5		21.168	5.02699	2.24814	27.4098	14.9262	5
34	28.656	2.87273	1.28472	32.223	25.089	5		22.22	5.02991	2.24944	28.4655	15.9745	5
34.08	29.036	4.00683	1.79191	34.0111	24.0609	5		20.88	7.96708	3.56299	30.7724	10.9876	5
34.17	28.234	2.50399	1.11982	31.3431	25.1249	5		23.014	8.32305	3.72218	33.3484	12.6796	5
34.25	31.25	2.4679	1.10368	34.3143	28.1857	5		22.718	5.35637	2.39544	29.3688	16.0672	5
34.33	30.61	2.57598	1.15201	33.8085	27.4115	5		21.08	6.75432	3.02063	29.4666	12.6934	5
34.42	30.022	1.80789	0.808513	32.2668	27.7772	5		21.336	4.82995	2.16002	27.3332	15.3388	5
34.5	30.118	1.99186	0.890788	32.5912	27.6448	5		20.962	5.57199	2.49187	27.8805	14.0435	5
34.58	30.628	4.00574	1.79142	35.6018	25.6542	5		22.76	5.58586	2.49807	29.6958	15.8242	5
34.67	33.29	2.95939	1.32348	36.9646	29.6154	5		20.532	6.62488	2.96274	28.7579	12.3061	5
34.75	32.282	4.88544	2.18484	38.3481	26.2159	5		19.314	6.23826	2.78983	27.0598	11.5682	5
34.83	31.79	2.88178	1.28877	35.3682	28.2118	5		21.916	6.5786	2.94204	30.0844	13.7476	5
34.92	31.646	2.19904	0.983441	34.3765	28.9155	5		20.914	4.17444	1.86687	26.0972	15.7308	5
35	27.464	4.14385	1.85319	32.6093	22.3187	5		20.024	5.05368	2.26008	26.299	13.749	5
35.08	31.674	3.04158	1.36024	35.4506	27.8974	5		20.156	4.58491	2.05044	25.8489	14.4631	5
35.17	30.616	5.54155	2.47825	37.4967	23.7353	5		21.904	5.71835	2.55732	29.0043	14.8037	5
35.25	26.95	4.15378	1.85762	32.1076	21.7924	5		20.65	7.79333	3.48528	30.3267	10.9733	5
35.33	27.212	1.70264	0.761442	29.3261	25.0979	5		19.71	6.69331	2.99334	28.0208	11.3992	5
35.42	28.022	2.92253	1.30699	31.6508	24.3932	5		18.67	5.26838	2.35609	25.2116	12.1284	5
35.5	26.298	2.48983	1.11349	29.3895	23.2065	5		20.524	4.48135	2.00412	26.0883	14.9597	5
35.58	26.19	4.50567	2.015	31.7845	20.5955	5		18.202	3.91871	1.7525	23.0677	13.3363	5
35.67	26.586	5.02434	2.24695	32.8245	20.3475	5		18.398	3.79365	1.69657	23.1084	13.6876	5
35.75	26.95	5.76377	2.57764	34.1067	19.7933	5		17.182	3.67911	1.64535	21.7502	12.6138	5
35.83	28.708	5.74516	2.56931	35.8416	21.5744	5		16.12	4.62082	2.06649	21.8575	10.3825	5
35.92	28.336	6.70966	3.00065	36.6671	20.0049	5		19.728	8.92819	3.99281	30.8138	8.64219	5
36	26	3.77243	1.68708	30.6841	21.3159	5		16.426	2.8946	1.29451	20.0201	12.8319	5
36.08	29.336	5.54167	2.47831	36.2169	22.4551	5		17.76	4.32379	1.93366	23.1287	12.3913	5
36.17	25.894	7.13056	3.18888	34.7478	17.0402	5		17.516	4.77195	2.13408	23.4412	11.5908	5
36.25	26.04	4.54522	2.03269	31.6836	20.3964	5		17.994	5.08439	2.27381	24.3071	11.6809	5
36.33	24.926	4.06377	1.81737	29.9718	19.8802	5		16.926	2.20761	0.987272	19.6671	14.1849	5
36.42	25.13	3.62677	1.62194	29.6332	20.6268	5		18.6	6.21375	2.77888	26.3154	10.8846	5
36.5	26.338	2.4118	1.07859	29.3326	23.3434	5		19.696	7.50549	3.35656	29.0153	10.3767	5
36.58	25.8	3.29949	1.47558	29.8969	21.7031	5		20.284	7.88822	3.52772	30.0785	10.4895	5
36.67	27.072	4.12097	1.84296	32.1889	21.9551	5		18.092	7.69472	3.44118	27.6463	8.53774	5
36.75	24.446	5.13668	2.2972	30.824	18.068	5		18.946	8.22849	3.67989	29.163	8.72898	5
36.83	25.662	3.72643	1.66651	30.289	21.035	5		18.944	6.5047	2.90899	27.0207	10.8673	5
36.92	30.564	4.27668	1.91259	35.8742	25.2538	5		20.506	7.45229	3.33277	29.7592	11.2528	5
37	27.942	5.05529	2.26079	34.219	21.665	5		19.224	7.20673	3.22295	28.1723	10.2757	5
37.08	26.678	3.82833	1.71208	31.4315	21.9245	5		21.036	9.30592	4.16174	32.5908	9.48117	5
37.17	26.508	1.20993	0.541095	28.0103	25.0057	5		18.044	8.33982	3.72968	28.3992	7.68875	5
37.25	26.41	2.80443	1.25418	29.8922	22.9278	5		17.388	5.36434	2.39901	24.0487	10.7273	5
37.33	26.682	3.55385	1.58933	31.0947	22.2693	5		19.638	4.90038	2.19152	25.7226	13.5534	5
37.42	25.632	2.96989	1.32817	29.3196	21.9444	5		17.658	6.38467	2.85531	25.5856	9.73038	5
37.5	28.166	4.32265	1.93315	33.5333	22.7987	5		18.24	7.28993	3.26015	27.2916	9.18836	5
37.58	27.87	3.36931	1.5068	32.0536	23.6864	5		17.586	7.14763	3.19652	26.461	8.71105	5
37.67	25.066	2.97943	1.33244	28.7654	21.3666	5		17.908	6.42253	2.87224	25.8826	9.93337	5
37.75	25.366	2.53813	1.13508	28.5175	22.2145	5		19.036	8.01466	3.58427	28.9875	9.08448	5
37.83	25.816	2.57826	1.15303	29.0173	22.6147	5		18.06	6.82371	3.05165	26.5327	9.58725	5
37.92	27.234	2.43512	1.08902	30.2576	24.2104	5		18.61	7.34593	3.2852	27.7312	9.48882	5
38	25.796	3.46288	1.54865	30.0957	21.4963	5		17.326	4.01527	1.79569	22.3116	12.3404	5
38.08	29.066	3.77186	1.68683	33.7494	24.3826	5		16.612	4.76163	2.12947	22.5243	10.6997	5
38.17	26.35	1.64327	0.734895	28.3904	24.3096	5		19.824	6.49575	2.90499	27.8895	11.7585	5
38.25	26.218	1.46592	0.655579	28.0382	24.3978	5		16.47	3.15665	1.4117	20.3895	12.5505	5
38.33	25.406	3.28334	1.46835	29.4828	21.3292	5		17.39	3.96336	1.77247	22.3112	12.4688	5
38.42	24.436	4.19452	1.87585	29.6442	19.2278	5		19.038	4.77217	2.13418	24.9634	13.1126	5
38.5	25.34	3.74773	1.67603	29.9934	20.6866	5		17.662	7.4827	3.34637	26.953	8.371	5
38.58	25.446	2.54372	1.13759	28.6045	22.2875	5		19.11	5.59867	2.5038	26.0617	12.1583	5
38.67	25.57	3.36005	1.50266	29.7421	21.3979	5		18.256	4.67531	2.09086	24.0612	12.4508	5
38.75	27.028	1.52744	0.683092	28.9246	25.1314	5		15.638	3.43525	1.53629	19.9034	11.3726	5
38.83	24.434	2.83609	1.26834	27.9555	20.9125	5		15.45	4.03405	1.80408	20.4589	10.4411	5
38.92	24.294	4.5647	2.0414	29.9618	18.6262	5		16.36	5.54704	2.48071	23.2476	9.47243	5
39	24.706	5.15632	2.30598	31.1084	18.3036	5		16.244	5.40248	2.41606	22.9521	9.53594	5
39.08	25.456	5.25678	2.35091	31.9832	18.9288	5		16.606	4.98649	2.23003	22.7976	10.4144	5
39.17	26.618	4.8516	2.1697	32.6421	20.5939	5		18.046	4.97789	2.22618	24.2269	11.8651	5
39.25	27.244	2.87785	1.28701	30.8173	23.6707	5		18.916	4.59458	2.05476	24.6209	13.2111	5
39.33	24.436	3.70181	1.6555	29.0324	19.8396	5		20.608	5.70493	2.55132	27.6916	13.5244	5
39.42	24.938	4.68426	2.09486	30.7543	19.1217	5		17.93	4.43962	1.98546	23.4425	12.4175	5
39.5	27.132	2.77654	1.24171	30.5795	23.6845	5		19.004	3.93793	1.7611	23.8936	14.1144	5
39.58	26.058	3.98592	1.78256	31.0072	21.1088	5		18.174	3.66678	1.63983	22.7269	13.6211	5
39.67	26.34	3.71928	1.66331	30.9581	21.7219	5		15.688	4.69363	2.09906	21.5159	9.86009	5
39.75	26.184	6.20494	2.77494	33.8885	18.4795	5		20.008	6.66457	2.98049	28.2832	11.7328	5
39.83	23.252	3.35967	1.50249	27.4236	19.0804	5		19.074	5.8659	2.62331	26.3575	11.7905	5
39.92	26.736	2.2413	1.00234	29.5189	23.9531	5		16.956	4.46215	1.99553	22.4965	11.4155	5
40	25.766	3.56335	1.59358	30.1905	21.3415	5		18	3.62017	1.61899	22.495	13.505	5
40.08	25.846	2.20715	0.987069	28.5865	23.1055	5		18.428	7.15794	3.20113	27.3158	9.54024	5
40.17	26.304	1.49594	0.669004	28.1615	24.4465	5		17.464	6.5232	2.91727	25.5636	9.36437	5
40.25	24.594	2.95739	1.32258	28.2661	20.9219	5		18.262	6.45099	2.88497	26.272	10.252	5
40.33	23.034	4.60553	2.05966	28.7525	17.3155	5		18.336	5.45044	2.43751	25.1036	11.5684	5
40.42	24.882	5.35862	2.39645	31.5356	18.2284	5		17.434	3.73077	1.66845	22.0664	12.8016	5
40.5	24.396	2.55729	1.14365	27.5713	21.2207	5		17.224	6.58833	2.94639	25.4045	9.0435	5
40.58	26.464	2.81636	1.25951	29.961	22.967	5		16.908	5.49416	2.45706	23.7299	10.0861	5
40.67	27.542	4.62612	2.06887	33.2861	21.7979	5		18.326	5.7729	2.58172	25.494	11.158	5
40.75	26.058	4.45382	1.99181	31.5881	20.5279	5		17.534	6.63709	2.9682	25.775	9.29297	5
40.83	25.248	6.36755	2.84766	33.1544	17.3416	5		16.39	5.89825	2.63778	23.7136	9.06635	5
40.92	26.368	5.03098	2.24992	32.6148	20.1212	5		16.768	4.98874	2.23103	22.9623	10.5737	5
41	24.526	5.12178	2.29053	30.8855	18.1665	5		17.328	5.86573	2.62324	24.6113	10.0447	5
41.08	24.952	3.85852	1.72558	29.743	20.161	5		17.36	4.76422	2.13062	23.2756	11.4444	5
41.17	25.372	6.45496	2.88674	33.3869	17.3571	5		18.674	5.4692	2.4459	25.4649	11.8831	5
41.25	25.28	3.12205	1.39622	29.1565	21.4035	5		19.204	3.66166	1.63754	23.7505	14.6575	5
41.33	25.228	6.31024	2.82202	33.0632	17.3928	5		18.71	3.89597	1.74233	23.5475	13.8725	5
41.42	25.448	2.06265	0.922445	28.0091	22.8869	5		18.886	4.64398	2.07685	24.6523	13.1197	5
41.5	25.08	3.20885	1.43504	29.0643	21.0957	5		19.922	3.69927	1.65436	24.5152	15.3288	5
41.58	24.666	1.87655	0.839217	26.996	22.336	5		17.938	6.51564	2.91388	26.0282	9.84776	5
41.67	26.004	4.23066	1.89201	31.2571	20.7509	5		20.004	5.47296	2.44758	26.7996	13.2084	5
41.75	25.256	2.67482	1.19622	28.5772	21.9348	5		21.006	6.25743	2.79841	28.7756	13.2364	5
41.83	26.242	2.79385	1.24945	29.711	22.773	5		19.544	4.72965	2.11517	25.4166	13.6714	5
41.92	25.314	3.00409	1.34347	29.0441	21.5839	5		18.122	5.56736	2.4898	25.0348	11.2092	5
42	25.638	4.89281	2.18813	31.7132	19.5628	5		17.276	3.32407	1.48657	21.4034	13.1486	5
42.08	24	3.96202	1.77187	28.9195	19.0805	5		19.836	6.06611	2.71285	27.3681	12.3039	5
42.17	26.878	4.08783	1.82813	31.9537	21.8023	5		21.064	7.35791	3.29056	30.2001	11.9279	5
42.25	23.562	4.7318	2.11613	29.4373	17.6867	5		19.686	7.15681	3.20062	28.5724	10.7996	5
42.33	23.768	3.63325	1.62484	28.2793	19.2567	5		18.068	3.62425	1.62082	22.5681	13.5679	5
42.42	24.48	2.99857	1.341	28.2032	20.7568	5		16.42	3.58815	1.60467	20.8753	11.9647	5
42.5	23.788	4.61105	2.06213	29.5134	18.0626	5		16.756	3.28224	1.46786	20.8314	12.6806	5
42.58	25.66	3.72234	1.66468	30.2819	21.0381	5		17.51	4.14408	1.85329	22.6556	12.3644	5
42.67	28.34	4.91785	2.19933	34.4463	22.2337	5		18.468	3.43161	1.53466	22.7289	14.2071	5
42.75	25.796	6.01333	2.68924	33.2625	18.3295	5		17.366	5.9211	2.648	24.718	10.014	5
42.83	26.474	3.07086	1.37333	30.287	22.661	5		17.372	5.84368	2.61337	24.6279	10.1161	5
42.92	27.454	3.31413	1.48212	31.569	23.339	5		16.354	4.15102	1.85639	21.5082	11.1998	5
43	27.564	3.25236	1.4545	31.6023	23.5257	5		19.056	4.57162	2.04449	24.7324	13.3796	5
43.08	26.91	5.06239	2.26397	33.1958	20.6242	5		18.202	4.17481	1.86703	23.3857	13.0183	5
43.17	26.352	3.4065	1.52343	30.5817	22.1223	5		19.004	7.81679	3.49577	28.7098	9.29818	5
43.25	26.072	2.48895	1.11309	29.1624	22.9816	5		19.966	3.91422	1.75049	24.8261	15.1059	5
43.33	25.906	2.55279	1.14164	29.0757	22.7363	5		17.942	5.12828	2.29343	24.3096	11.5744	5
43.42	26.53	4.63417	2.07246	32.2841	20.7759	5		18.75	5.03836	2.25322	25.0059	12.4941	5
43.5	29.094	4.26941	1.90934	34.3952	23.7928	5		19.312	3.99401	1.78618	24.2712	14.3528	5
43.58	24.362	2.21502	0.990588	27.1123	21.6117	5		19.292	4.08243	1.82572	24.361	14.223	5
43.67	25.398	3.82574	1.71092	30.1483	20.6477	5		19.142	6.38008	2.85326	27.0639	11.2201	5
43.75	24.812	3.18735	1.42543	28.7696	20.8544	5		20.036	5.39458	2.41253	26.7343	13.3377	5
43.83	26.71	0.837825	0.374687	27.7503	25.6697	5		16.784	4.7874	2.14099	22.7283	10.8397	5
43.92	25.396	1.53622	0.68702	27.3035	23.4885	5		17.966	5.26271	2.35355	24.5005	11.4315	5
44	24.886	3.51646	1.57261	29.2523	20.5197	5		17.842	2.93874	1.31424	21.4909	14.1931	5
44.08	25.96	3.72648	1.66653	30.587	21.333	5		20.56	3.76437	1.68348	25.2341	15.8859	5
44.17	25.314	1.79198	0.801396	27.539	23.089	5		18.896	4.98016	2.2272	25.0797	12.7123	5
44.25	25.186	2.68767	1.20196	28.5232	21.8488	5		17.77	6.09445	2.72552	25.3373	10.2027	5
44.33	26.746	5.61951	2.51312	33.7235	19.7685	5		17.846	4.6526	2.08071	23.623	12.069	5
44.42	27.136	4.71023	2.10648	32.9845	21.2875	5		19.098	7.5024	3.35518	28.4135	9.78253	5
44.5	26.462	4.84417	2.16638	32.4768	20.4472	5		19.494	6.19197	2.76913	27.1823	11.8057	5
44.58	26.234	2.30422	1.03048	29.0951	23.3729	5		19.916	7.32855	3.27743	29.0156	10.8164	5
44.67	24.99	2.76577	1.23689	28.4242	21.5558	5		20	4.71745	2.10971	25.8575	14.1425	5
44.75	24.352	2.27981	1.01956	27.1828	21.5212	5		20.832	4.75492	2.12647	26.736	14.928	5
44.83	27.392	1.99887	0.893921	29.8739	24.9101	5		21.318	5.24397	2.34518	27.8293	14.8067	5
44.92	23.474	5.12243	2.29082	29.8343	17.1137	5		20.99	5.58954	2.49972	27.9303	14.0497	5
45	23.482	4.1668	1.86345	28.6558	18.3082	5		19.616	5.96833	2.66912	27.0267	12.2053	5
45.08	27.338	1.2706	0.568229	28.9157	25.7603	5		18.654	5.52875	2.47253	25.5189	11.7891	5
45.17	25.826	1.54801	0.69229	27.7481	23.9039	5		20.822	3.19937	1.4308	24.7945	16.8495	5
45.25	27.56	5.85376	2.61788	34.8284	20.2916	5		20.04	6.13	2.74142	27.6514	12.4286	5
45.33	27.064	4.56511	2.04158	32.7323	21.3957	5		21.138	5.92014	2.64757	28.4888	13.7872	5
45.42	26.414	2.01505	0.901158	28.916	23.912	5		22.248	5.68871	2.54407	29.3115	15.1845	5
45.5	28.426	1.14071	0.510143	29.8424	27.0096	5		19.104	7.42237	3.31939	28.3201	9.88791	5
45.58	24.696	2.66229	1.19061	28.0017	21.3903	5		19.056	5.1471	2.30185	25.447	12.665	5
45.67	24.008	2.00967	0.898751	26.5033	21.5127	5		20.622	5.72305	2.55942	27.7281	13.5159	5
45.75	26.332	2.03338	0.909354	28.8568	23.8072	5		18.714	3.72117	1.66416	23.3344	14.0936	5
45.83	27.922	1.5686	0.701501	29.8697	25.9743	5		19.328	7.58883	3.39383	28.7508	9.90523	5
45.92	26.348	3.22809	1.44365	30.3562	22.3398	5		17.21	5.60762	2.50781	24.1728	10.2472	5
46	28.094	3.31295	1.4816	32.2076	23.9804	5		21.548	5.65148	2.52742	28.5652	14.5308	5
46.08	27.646	3.73064	1.66839	32.2782	23.0138	5		19.332	2.99411	1.33901	23.0497	15.6143	5
46.17	27.324	6.8313	3.05505	35.8062	18.8418	5		21.122	4.76041	2.12892	27.0328	15.2112	5
46.25	26.292	4.11611	1.84078	31.4028	21.1812	5		18.548	3.90896	1.74814	23.4016	13.6944	5
46.33	29.218	6.07925	2.71872	36.7664	21.6696	5		19.388	7.49883	3.35358	28.699	10.077	5
46.42	26.824	6.92422	3.0966	35.4216	18.2264	5		19.018	7.27635	3.25408	28.0528	9.98322	5
46.5	26.112	0.847508	0.379017	27.1643	25.0597	5		18.24	6.87658	3.0753	26.7784	9.7016	5
46.58	25.116	1.54545	0.691148	27.0349	23.1971	5		18.478	5.86281	2.62193	25.7576	11.1984	5
46.67	24.304	2.94182	1.31562	27.9568	20.6512	5		19.922	6.04774	2.70463	27.4313	12.4127	5
46.75	25.432	3.50811	1.56888	29.7879	21.0761	5		19.452	4.84578	2.1671	25.4688	13.4352	5
46.83	26.032	2.17384	0.97217	28.7312	23.3328	5		17.956	5.18016	2.31664	24.388	11.524	5
46.92	28.968	1.24921	0.558663	30.5191	27.4169	5		20.198	5.63523	2.52015	27.1951	13.2009	5
47	25.592	1.96069	0.876849	28.0265	23.1575	5		18.762	6.88293	3.07814	27.3083	10.2157	5
47.08	26.594	3.99225	1.78539	31.551	21.637	5		18.606	8.13123	3.6364	28.7023	8.50974	5
47.17	27.846	3.00928	1.34579	31.5825	24.1095	5		21.094	6.65525	2.97632	29.3576	12.8304	5
47.25	28.824	3.67446	1.64327	33.3864	24.2616	5		18.994	6.63409	2.96686	27.2313	10.7567	5
47.33	27.76	2.88533	1.29036	31.3426	24.1774	5		21.04	4.55313	2.03622	26.6935	15.3865	5
47.42	28.492	3.63998	1.62785	33.0116	23.9724	5		20.216	3.49524	1.56312	24.5559	15.8761	5
47.5	25.678	2.36237	1.05648	28.6113	22.7447	5		20.646	7.00105	3.13096	29.3389	11.9531	5
47.58	27.082	2.29032	1.02426	29.9258	24.2382	5		19.842	4.94229	2.21026	25.9787	13.7053	5
47.67	28.562	3.2917	1.4721	32.6492	24.4748	5		19.756	2.65466	1.1872	23.0522	16.4598	5
47.75	30.266	2.28156	1.02035	33.0989	27.4331	5		20.67	4.61612	2.06439	26.4017	14.9383	5
47.83	30.586	5.9907	2.67912	38.0244	23.1476	5		18.472	5.63722	2.52104	25.4715	11.4725	5
47.92	26.984	5.7411	2.5675	34.1125	19.8555	5		18.946	5.13407	2.29603	25.3208	12.5712	5

## Sheet: Figure 9E
			Baseline							+ Tamoxifen						Heart rate day	Control	Stim1 smKO		Heart rate night	Control	Stim1 smKO
Time (h)	Mean	SD	SEM	Upper limit	Lower limit	N		Mean	SD	SEM	Upper limit	Lower limit	N			Mouse 1	505.731	492.228		Mouse 1	565.139	580.187
0	667.598	114.691	51.2912	810.005	525.191	5		615.344	103.422	46.2517	743.759	486.929	5			Mouse 2	522.192	542.123		Mouse 2	595.199	623.639
0.08	651.054	99.4023	44.454	774.478	527.63	5		593.852	65.7884	29.4215	675.539	512.165	5			Mouse 3	558.298	556.156		Mouse 3	614.039	621.632
0.17	662.344	89.4932	40.0226	773.464	551.224	5		600.688	101.831	45.54	727.127	474.249	5			Mouse 4	434.28	455.137		Mouse 4	541.214	539.797
0.25	632.158	69.5155	31.0883	718.473	545.843	5		563.544	104.248	46.6211	692.985	434.103	5			Mouse 5	489.043	450.213		Mouse 5	567.635	544.524
0.33	620.578	94.9743	42.4738	738.504	502.652	5		620.084	93.2217	41.69	735.834	504.334	5
0.42	588.62	118.806	53.1317	736.137	441.103	5		574.514	92.6896	41.452	689.603	459.425	5		Paired t test				Paired t test
0.5	561.996	123.277	55.1312	715.065	408.927	5		589.722	94.6204	42.3155	707.209	472.235	5		P value	0.8183			P value	0.5714
0.58	578.32	138.88	62.1091	750.762	405.878	5		557.448	141.725	63.3812	733.422	381.474	5		Significantly different (P < 0.05)?	No			Significantly different (P < 0.05)?	No
0.67	586.618	121.472	54.3238	737.445	435.791	5		534.662	130.23	58.2406	696.364	372.96	5		One- or two-tailed P value?	Two-tailed			One- or two-tailed P value?	Two-tailed
0.75	612.644	106.596	47.6714	745.001	480.287	5		570.198	142.413	63.6889	747.027	393.369	5
0.83	564.248	121.766	54.4554	715.44	413.056	5		560.958	131.984	59.0251	724.838	397.078	5		Mean of differences (B - A)	-2.737			Mean of differences (B - A)	5.311
0.92	571.67	109.948	49.1701	708.188	435.152	5		616.824	116.807	52.2378	761.859	471.789	5		SD of differences	24.95			SD of differences	19.29
1	560.806	104.375	46.678	690.405	431.207	5		593.682	114.544	51.2255	735.907	451.457	5		SEM of differences	11.16			SEM of differences	8.626
1.08	525.96	84.9588	37.9947	631.45	420.47	5		626.03	54.0137	24.1557	693.097	558.963	5		95% confidence interval	-33.71 to 28.24			95% confidence interval	-18.64 to 29.26
1.17	620.534	74.0566	33.1191	712.487	528.581	5		677.23	24.6433	11.0208	707.829	646.631	5
1.25	619.046	95.9597	42.9145	738.196	499.896	5		643.258	39.9391	17.8613	692.849	593.667	5
1.33	635.194	46.6244	20.8511	693.086	577.302	5		606.142	30.7604	13.7565	644.336	567.948	5
1.42	652.498	24.0442	10.7529	682.353	622.643	5		603.258	21.1539	9.4603	629.524	576.992	5
1.5	652.26	26.7733	11.9734	685.503	619.017	5		610.77	65.3503	29.2255	691.913	529.627	5
1.58	599.81	76.4771	34.2016	694.769	504.851	5		628.266	41.8121	18.6989	680.183	576.349	5
1.67	625.832	76.5163	34.2191	720.84	530.824	5		622.61	48.6015	21.7353	682.957	562.263	5
1.75	626.712	34.6368	15.49	669.719	583.705	5		636.498	23.1712	10.3625	665.269	607.727	5
1.83	554.216	48.7466	21.8002	614.743	493.689	5		648.176	38.3059	17.1309	695.739	600.613	5
1.92	543.266	99.5559	44.5227	666.881	419.651	5		607.554	31.5215	14.0968	646.693	568.415	5
2	578.916	100.775	45.068	704.045	453.787	5		625.994	43.575	19.4873	680.099	571.889	5
2.08	563.722	94.8821	42.4325	681.534	445.91	5		631.04	41.4635	18.543	682.524	579.556	5
2.17	526.132	77.468	34.6447	622.321	429.943	5		628.478	45.3407	20.277	684.776	572.18	5
2.25	551.232	73.6845	32.9527	642.723	459.741	5		605.548	53.0977	23.746	671.477	539.619	5
2.33	557.01	68.4771	30.6239	642.036	471.984	5		561.884	44.0616	19.7049	616.594	507.174	5
2.42	602.33	120.864	54.0521	752.403	452.257	5		562.068	41.9334	18.7532	614.135	510.001	5
2.5	574.538	120.423	53.855	724.063	425.013	5		632.516	66.2481	29.627	714.774	550.258	5
2.58	607.764	57.4487	25.6918	679.096	536.432	5		593.97	23.7778	10.6337	623.494	564.446	5
2.67	648.154	40.3265	18.0346	698.226	598.082	5		564.568	67.0464	29.9841	647.817	481.319	5
2.75	606.612	23.1667	10.3605	635.377	577.847	5		543.448	43.5621	19.4816	597.538	489.358	5
2.83	601.072	58.4024	26.1183	673.588	528.556	5		585.946	33.0389	14.7755	626.969	544.923	5
2.92	608.99	73.0226	32.6567	699.66	518.32	5		585.244	29.0337	12.9843	621.294	549.194	5
3	639.18	44.5386	19.9183	694.482	583.878	5		603.304	55.3683	24.7615	672.053	534.555	5
3.08	600.266	60.7911	27.1866	675.748	524.784	5		563.748	94.3226	42.1823	680.865	446.631	5
3.17	601.146	38.4809	17.2092	648.926	553.366	5		553.546	91.7745	41.0428	667.499	439.593	5
3.25	608.172	43.2571	19.3451	661.883	554.461	5		589.944	80.3171	35.9189	689.671	490.217	5
3.33	594.214	88.7004	39.668	704.35	484.078	5		577.734	92.9396	41.5639	693.134	462.334	5
3.42	589.432	62.6799	28.0313	667.259	511.605	5		582.984	104.244	46.6193	712.42	453.548	5
3.5	611.378	73.3273	32.793	702.426	520.33	5		569.852	134.442	60.1244	736.784	402.92	5
3.58	603.466	102.521	45.8486	730.762	476.17	5		599.92	112.82	50.4548	740.005	459.835	5
3.67	644.826	43.6833	19.5358	699.066	590.586	5		529.516	123.641	55.294	683.037	375.995	5
3.75	546.764	84.6563	37.8594	651.879	441.649	5		523.438	68.4087	30.5933	608.379	438.497	5
3.83	572.37	69.5816	31.1178	658.767	485.973	5		547.852	89.3927	39.9776	658.848	436.856	5
3.92	554.282	108.554	48.5468	689.069	419.495	5		582.036	125.255	56.0156	737.56	426.512	5
4	539.082	88.9086	39.7611	649.477	428.687	5		541.852	89.823	40.1701	653.382	430.322	5
4.08	592.34	146.012	65.2984	773.637	411.043	5		581.024	38.0154	17.001	628.226	533.822	5
4.17	584.974	159.275	71.23	782.74	387.208	5		610.812	32.6126	14.5848	651.306	570.318	5
4.25	571.502	129.267	57.8098	732.008	410.996	5		580.168	76.7267	34.3132	675.437	484.899	5
4.33	607.048	85.7042	38.3281	713.464	500.632	5		598.504	96.2937	43.0639	718.068	478.94	5
4.42	633.978	91.7908	41.0501	747.951	520.005	5		584.498	71.3601	31.9132	673.103	495.893	5
4.5	659.47	52.8216	23.6225	725.057	593.883	5		591.744	23.6726	10.5867	621.137	562.351	5
4.58	624.67	45.2309	20.2279	680.832	568.508	5		616.732	30.9601	13.8458	655.174	578.29	5
4.67	645.244	14.5406	6.50275	663.299	627.189	5		607.726	68.1626	30.4832	692.361	523.091	5
4.75	566.084	76.644	34.2763	661.25	470.918	5		612.258	69.4965	31.0798	698.549	525.967	5
4.83	573.59	57.0662	25.5208	644.447	502.733	5		581.988	27.6849	12.3811	616.363	547.613	5
4.92	608.716	79.3576	35.4898	707.251	510.181	5		627.488	34.4289	15.3971	670.237	584.739	5
5	558.528	66.6688	29.8152	641.308	475.748	5		604.452	76.2258	34.0892	699.099	509.805	5
5.08	537.532	48.8258	21.8356	598.157	476.907	5		618.868	38.5011	17.2182	666.673	571.063	5
5.17	528.178	65.8387	29.4439	609.927	446.429	5		594.832	84.6065	37.8372	699.885	489.779	5
5.25	553.144	71.0601	31.7791	641.377	464.911	5		576.516	40.3011	18.0232	626.556	526.476	5
5.33	537.258	103.99	46.506	666.379	408.137	5		601.24	42.0936	18.8248	653.506	548.974	5
5.42	534.02	137.732	61.5955	705.037	363.003	5		582.554	48.3595	21.627	642.6	522.508	5
5.5	561.04	95.6212	42.7631	679.769	442.311	5		598.806	86.3586	38.6208	706.034	491.578	5
5.58	501.108	64.54	28.8632	581.245	420.971	5		597.826	92.5938	41.4092	712.796	482.856	5
5.67	519.532	89.5965	40.0688	630.781	408.283	5		571.364	110.765	49.5354	708.896	433.832	5
5.75	566.646	74.711	33.4118	659.412	473.88	5		570.45	107.637	48.1366	704.099	436.801	5
5.83	648.92	59.3092	26.5239	722.562	575.278	5		553.3	91.3581	40.8566	666.736	439.864	5
5.92	606.112	109.368	48.9107	741.91	470.314	5		520.078	31.9333	14.281	559.728	480.428	5
6	644.39	71.146	31.8175	732.729	556.051	5		523.466	89.6051	40.0726	634.725	412.207	5
6.08	601.542	62.162	27.7997	678.726	524.358	5		514.654	75.6988	33.8535	608.646	420.662	5
6.17	629.43	97.2237	43.4798	750.149	508.711	5		588.84	82.8716	37.0613	691.739	485.941	5
6.25	615.866	84.647	37.8553	720.969	510.763	5		560.75	83.359	37.2793	664.254	457.246	5
6.33	621.556	44.4544	19.8806	676.753	566.359	5		531.436	139.872	62.5526	705.11	357.762	5
6.42	562.096	89.7101	40.1196	673.486	450.706	5		570.434	131.912	58.9928	734.224	406.644	5
6.5	574.774	87.4112	39.0915	683.309	466.239	5		521.916	67.4792	30.1776	605.702	438.13	5
6.58	574.012	124.03	55.4678	728.015	420.009	5		570.87	79.8024	35.6887	669.958	471.782	5
6.67	546.54	106.513	47.6339	678.793	414.287	5		619.264	64.2589	28.7375	699.052	539.476	5
6.75	554.262	86.0762	38.4945	661.14	447.384	5		607.53	77.5954	34.7017	703.877	511.183	5
6.83	541.578	79.0433	35.3492	639.723	443.433	5		556.584	70.875	31.6963	644.587	468.581	5
6.92	548.464	39.46	17.6471	597.46	499.468	5		555.966	47.3969	21.1965	614.817	497.115	5
7	541.582	76.1266	34.0448	636.106	447.058	5		526.722	70.677	31.6077	614.479	438.965	5
7.08	511.324	96.361	43.0939	630.972	391.676	5		535.334	126.607	56.6203	692.537	378.131	5
7.17	504.846	66.2271	29.6177	587.078	422.614	5		542.66	72.6954	32.5104	632.923	452.397	5
7.25	511.732	98.8636	44.2132	634.487	388.977	5		554.026	80.678	36.0803	654.201	453.851	5
7.33	515.054	98.3376	43.9779	637.156	392.952	5		576.498	63.7211	28.4969	655.618	497.378	5
7.42	509.76	56.6097	25.3166	580.05	439.47	5		540.73	58.4952	26.1598	613.361	468.099	5
7.5	477.96	33.6769	15.0608	519.775	436.145	5		555.824	72.767	32.5424	646.176	465.472	5
7.58	509.29	79.5594	35.5801	608.076	410.504	5		571.16	34.0444	15.2251	613.432	528.888	5
7.67	502.614	64.3846	28.7937	582.558	422.67	5		568.65	82.9866	37.1127	671.691	465.609	5
7.75	497.504	98.5208	44.0598	619.834	375.174	5		600.432	98.8262	44.1964	723.141	477.723	5
7.83	523.72	79.7349	35.6585	622.724	424.716	5		566.212	60.3306	26.9807	641.122	491.302	5
7.92	485.41	99.998	44.7205	609.574	361.246	5		580.516	63.8004	28.5324	659.735	501.297	5
8	494.01	58.5393	26.1796	566.696	421.324	5		529.054	50.1821	22.4421	591.363	466.745	5
8.08	495.432	73.7979	33.0034	587.064	403.8	5		537.736	75.838	33.9158	631.901	443.571	5
8.17	550.488	119.66	53.5137	699.066	401.91	5		532.61	119.201	53.3081	680.617	384.603	5
8.25	477.162	71.9824	32.1915	566.54	387.784	5		559.178	106.795	47.7604	691.782	426.574	5
8.33	526.894	99.2257	44.3751	650.099	403.689	5		553.708	108.899	48.701	688.924	418.492	5
8.42	524.278	76.2415	34.0962	618.944	429.612	5		523.652	110.89	49.5916	661.34	385.964	5
8.5	598.918	111.988	50.0827	737.97	459.866	5		543.394	122.24	54.6672	695.175	391.613	5
8.58	603.086	127.436	56.9909	761.318	444.854	5		540.552	78.5498	35.1286	638.085	443.019	5
8.67	560.422	118.015	52.7781	706.957	413.887	5		544.392	114.613	51.2567	686.703	402.081	5
8.75	609.632	49.4913	22.1332	671.084	548.18	5		575.79	109.549	48.992	711.814	439.766	5
8.83	622.85	90.5239	40.4835	735.25	510.45	5		569.578	78.6056	35.1535	667.18	471.976	5
8.92	538.346	115.923	51.8424	682.283	394.409	5		574.882	62.1168	27.7795	652.01	497.754	5
9	533.45	109.555	48.9943	669.48	397.42	5		598.648	91.7855	41.0477	712.615	484.681	5
9.08	595.548	91.8478	41.0756	709.592	481.504	5		619.08	47.9401	21.4395	678.606	559.554	5
9.17	545.466	86.6346	38.7442	653.037	437.895	5		594.974	70.437	31.5004	682.433	507.515	5
9.25	542.188	90.6201	40.5265	654.708	429.668	5		567.49	73.0739	32.6796	658.223	476.757	5
9.33	570.112	74.3465	33.2488	662.425	477.799	5		612.182	55.5002	24.8204	681.095	543.269	5
9.42	599.828	51.1188	22.861	663.3	536.356	5		583.608	19.3243	8.64207	607.602	559.614	5
9.5	551.754	88.2629	39.4724	661.347	442.161	5		577.806	27.7962	12.4308	612.32	543.292	5
9.58	534.454	59.0168	26.3931	607.733	461.175	5		574.336	40.6804	18.1928	624.847	523.825	5
9.67	550.922	99.994	44.7187	675.081	426.763	5		600.594	53.6318	23.9849	667.187	534.001	5
9.75	574.95	85.7005	38.3264	681.361	468.539	5		576.806	84.8914	37.9646	682.213	471.399	5
9.83	519.218	98.6367	44.1117	641.692	396.744	5		574.866	99.2472	44.3847	698.098	451.634	5
9.92	548.438	143.289	64.081	726.355	370.521	5		546.934	103.385	46.2354	675.304	418.564	5
10	541.098	127.958	57.2247	699.979	382.217	5		571.802	95.2439	42.5944	690.063	453.541	5
10.08	507.21	97.948	43.8037	628.829	385.591	5		554.634	126.411	56.5327	711.594	397.674	5
10.17	488.316	67.4191	30.1508	572.028	404.604	5		544.522	122.526	54.7951	696.658	392.386	5
10.25	521.88	84.6485	37.8559	626.985	416.775	5		529.984	108.645	48.5874	664.884	395.084	5
10.33	629.148	65.5422	29.3114	710.529	547.767	5		581.284	93.7457	41.9243	697.685	464.883	5
10.42	588.066	85.2406	38.1208	693.906	482.226	5		565.512	85.7028	38.3275	671.926	459.098	5
10.5	568.932	77.2563	34.5501	664.858	473.006	5		583.644	88.9619	39.785	694.105	473.183	5
10.58	613.32	60.5429	27.0756	688.494	538.146	5		528.22	87.2198	39.0059	636.518	419.922	5
10.67	634.914	105.299	47.0913	765.66	504.168	5		583.876	47.3117	21.1584	642.621	525.131	5
10.75	642.024	108.934	48.7166	777.283	506.765	5		595.098	68.2528	30.5236	679.845	510.351	5
10.83	602.736	115.356	51.5888	745.97	459.502	5		626.35	56.7951	25.3996	696.87	555.83	5
10.92	539.064	119.217	53.3156	687.092	391.036	5		603.376	60.3557	26.9919	678.318	528.434	5
11	502.838	125.412	56.086	658.558	347.118	5		622.142	25.4626	11.3872	653.758	590.526	5
11.08	514.636	130.018	58.1456	676.074	353.198	5		593.382	60.2175	26.9301	668.152	518.612	5
11.17	501.376	71.6929	32.0621	590.395	412.357	5		603.044	55.0732	24.6295	671.426	534.662	5
11.25	526.576	92.2693	41.2641	641.143	412.009	5		596.588	53.4789	23.9165	662.991	530.185	5
11.33	517.464	77.2503	34.5474	613.383	421.545	5		580.662	36.253	16.2128	625.676	535.648	5
11.42	531.138	57.4327	25.6847	602.45	459.826	5		583.27	83.4636	37.326	686.904	479.636	5
11.5	508.164	58.8864	26.3348	581.281	435.047	5		519.312	77.7445	34.7684	615.845	422.779	5
11.58	455.388	31.8445	14.2413	494.928	415.848	5		525.618	72.491	32.419	615.627	435.609	5
11.67	483.222	66.6852	29.8225	566.023	400.421	5		572.238	68.1157	30.4623	656.815	487.661	5
11.75	569.938	103.284	46.1898	698.181	441.695	5		542.322	82.5437	36.9147	644.814	439.83	5
11.83	516.472	91.6963	41.0078	630.328	402.616	5		568.124	81.1462	36.2897	668.88	467.368	5
11.92	488.422	105.618	47.234	619.565	357.279	5		564.868	124.695	55.7654	719.697	410.039	5
12	509.992	106.332	47.5529	642.02	377.964	5		511.246	119.962	53.6487	660.199	362.293	5
12.08	548.546	71.3814	31.9227	637.178	459.914	5		519.884	112.277	50.2118	659.294	380.474	5
12.17	536.272	98.2934	43.9581	658.319	414.225	5		503.252	90.3057	40.3859	615.381	391.123	5
12.25	590.152	100.806	45.082	715.32	464.984	5		510.22	74.9695	33.5274	603.307	417.133	5
12.33	569.272	70.8184	31.6709	657.205	481.339	5		524.282	113.583	50.7959	665.314	383.25	5
12.42	560.644	92.5226	41.3774	675.526	445.762	5		481.506	71.2038	31.8433	569.917	393.095	5
12.5	565.006	79.1872	35.4136	663.33	466.682	5		519.302	28.7011	12.8355	554.939	483.665	5
12.58	563.448	48.8613	21.8514	624.117	502.779	5		555.942	53.4002	23.8813	622.247	489.637	5
12.67	538.604	82.1913	36.757	640.658	436.55	5		586.974	31.1653	13.9375	625.671	548.277	5
12.75	498.626	50.5102	22.5888	561.343	435.909	5		516.608	39.6258	17.7212	565.81	467.406	5
12.83	490.804	46.4302	20.7642	548.455	433.153	5		521.282	68.6073	30.6821	606.469	436.095	5
12.92	459.514	30.2928	13.5473	497.127	421.901	5		494.05	66.3302	29.6638	576.41	411.69	5
13	482.864	63.9575	28.6027	562.278	403.45	5		489.102	50.3896	22.5349	551.669	426.535	5
13.08	436.132	35.5888	15.9158	480.321	391.943	5		466.384	54.3059	24.2863	533.814	398.954	5
13.17	427.566	43.8813	19.6243	482.052	373.08	5		481.26	43.3319	19.3786	535.064	427.456	5
13.25	492.736	107.453	48.0545	626.157	359.315	5		462.758	29.9349	13.3873	499.927	425.589	5
13.33	513.104	98.0522	43.8503	634.852	391.356	5		484.122	43.1353	19.2907	537.682	430.562	5
13.42	467.09	56.5556	25.2925	537.313	396.867	5		504.186	82.356	36.8307	606.444	401.928	5
13.5	508.188	98.839	44.2022	630.913	385.463	5		464.102	52.7699	23.5994	529.624	398.58	5
13.58	554.074	135.751	60.7098	722.631	385.517	5		477.618	34.4445	15.4041	520.387	434.849	5
13.67	496.722	62.3611	27.8887	574.153	419.291	5		464.542	40.3165	18.0301	514.602	414.482	5
13.75	486.534	65.976	29.5054	568.454	404.614	5		474.462	52.5507	23.5014	539.712	409.212	5
13.83	496.076	88.2324	39.4587	605.631	386.521	5		488.952	32.001	14.3113	528.687	449.217	5
13.92	508.832	51.0489	22.8298	572.218	445.446	5		441.094	38.2523	17.1069	488.59	393.598	5
14	484.964	32.503	14.5358	525.322	444.606	5		475.618	64.4233	28.811	555.61	395.626	5
14.08	475.614	57.9269	25.9057	547.54	403.688	5		501.566	97.748	43.7142	622.936	380.196	5
14.17	440.092	34.3476	15.3607	482.74	397.444	5		471.556	63.1092	28.2233	549.916	393.196	5
14.25	419.172	38.3083	17.132	466.738	371.606	5		460.226	66.3075	29.6536	542.558	377.894	5
14.33	446.596	54.6551	24.4425	514.459	378.733	5		481.046	92.6955	41.4547	596.143	365.949	5
14.42	455.19	61.4872	27.4979	531.536	378.844	5		488.184	101.554	45.4163	614.28	362.088	5
14.5	502.374	97.1802	43.4603	623.039	381.709	5		500.16	99.1427	44.338	623.262	377.058	5
14.58	460.264	44.199	19.7664	515.144	405.384	5		556.506	71.036	31.7683	644.709	468.303	5
14.67	474.678	66.6583	29.8105	557.445	391.911	5		533.884	66.3782	29.6853	616.303	451.465	5
14.75	492.976	49.4317	22.1065	554.354	431.598	5		509.186	90.0549	40.2738	621.004	397.368	5
14.83	487.376	62.2954	27.8593	564.726	410.026	5		508.602	27.894	12.4746	543.237	473.967	5
14.92	482.388	45.8458	20.5028	539.313	425.463	5		496.884	55.6078	24.8686	565.93	427.838	5
15	458.552	68.3611	30.572	543.434	373.67	5		501.814	77.6765	34.738	598.262	405.366	5
15.08	462.946	33.605	15.0286	504.672	421.22	5		487.942	65.7895	29.422	569.631	406.253	5
15.17	501.198	104.895	46.9103	631.442	370.954	5		457.74	64.9925	29.0655	538.439	377.041	5
15.25	531.442	107.195	47.9391	664.542	398.342	5		486.642	87.1667	38.9821	594.874	378.41	5
15.33	509.796	90.8957	40.6498	622.658	396.934	5		463.094	88.3193	39.4976	572.757	353.431	5
15.42	545.774	45.7507	20.4603	602.581	488.967	5		442.682	80.5878	36.0399	542.745	342.619	5
15.5	487.12	63.3435	28.3281	565.771	408.469	5		441.086	41.321	18.4793	492.393	389.779	5
15.58	485.23	86.588	38.7233	592.743	377.717	5		458.982	57.5827	25.7518	530.48	387.484	5
15.67	454.2	69.7251	31.182	540.775	367.625	5		483.832	65.0912	29.1097	564.653	403.011	5
15.75	433.456	52.2696	23.3757	498.357	368.555	5		488.878	52.192	23.341	553.683	424.073	5
15.83	484.332	61.6277	27.5607	560.853	407.811	5		513.444	23.9804	10.7243	543.22	483.668	5
15.92	469.486	74.9038	33.498	562.491	376.481	5		523.568	69.8928	31.257	610.351	436.785	5
16	464.876	50.553	22.608	527.646	402.106	5		513.286	83.551	37.3652	617.028	409.544	5
16.08	477.456	64.9177	29.0321	558.062	396.85	5		481.374	89.6569	40.0958	592.698	370.05	5
16.17	494.732	43.5931	19.4954	548.86	440.604	5		491.81	80.2658	35.896	591.473	392.147	5
16.25	467.238	56.9834	25.4838	537.992	396.484	5		520.488	57.7421	25.8231	592.184	448.792	5
16.33	492.102	50.9601	22.79	555.377	428.827	5		506.222	67.3971	30.1409	589.907	422.537	5
16.42	518.182	51.6108	23.081	582.265	454.099	5		473.628	18.7693	8.39388	496.933	450.323	5
16.5	473.118	36.4912	16.3193	518.428	427.808	5		463.026	32.9994	14.7578	504	422.052	5
16.58	552.588	119.613	53.4927	701.107	404.069	5		474.238	53.8401	24.078	541.089	407.387	5
16.67	565.294	89.6429	40.0895	676.6	453.988	5		522.778	110.712	49.5119	660.245	385.311	5
16.75	505.646	98.0288	43.8398	627.365	383.927	5		483.662	81.5111	36.4529	584.871	382.453	5
16.83	524.9	120.893	54.065	675.008	374.792	5		519.362	67.2208	30.062	602.828	435.896	5
16.92	521.14	48.6594	21.7611	581.559	460.721	5		490.684	98.3377	43.978	612.786	368.582	5
17	489.728	53.3335	23.8514	555.95	423.506	5		516.9	39.527	17.677	565.979	467.821	5
17.08	465.42	43.018	19.2382	518.834	412.006	5		534.656	43.6179	19.5065	588.815	480.497	5
17.17	494.474	48.1563	21.5362	554.268	434.68	5		533.738	47.5319	21.2569	592.757	474.719	5
17.25	470.652	43.3426	19.3834	524.469	416.835	5		488.276	40.6083	18.1606	538.698	437.854	5
17.33	467.988	50.7345	22.6892	530.983	404.993	5		461.96	42.0132	18.7889	514.126	409.794	5
17.42	440.61	39.9474	17.865	490.211	391.009	5		516.746	43.2785	19.3547	570.483	463.009	5
17.5	550.298	113.65	50.826	691.413	409.183	5		508.568	30.8134	13.7802	546.828	470.308	5
17.58	528.108	117.906	52.7291	674.508	381.708	5		490.838	72.3184	32.3418	580.633	401.043	5
17.67	501.776	63.6564	28.468	580.816	422.736	5		481.768	56.6762	25.3463	552.141	411.395	5
17.75	488.942	43.9097	19.637	543.463	434.421	5		452.114	36.115	16.1511	496.957	407.271	5
17.83	478.668	33.9115	15.1657	520.775	436.561	5		497.322	70.5503	31.5511	584.922	409.722	5
17.92	519.532	88.1295	39.4127	628.959	410.105	5		480.966	102.591	45.8802	608.35	353.582	5
18	517.25	100.405	44.9026	641.92	392.58	5		454.2	39.8493	17.8211	503.679	404.721	5
18.08	493.898	96.2858	43.0603	613.453	374.343	5		450.162	58.7692	26.2824	523.134	377.19	5
18.17	490.758	92.9834	41.5835	606.212	375.304	5		483.596	38.6372	17.2791	531.57	435.622	5
18.25	450.884	60.5908	27.097	526.117	375.651	5		428.632	35.7168	15.973	472.98	384.284	5
18.33	450.678	38.1503	17.0613	498.048	403.308	5		443.506	34.0355	15.2211	485.767	401.245	5
18.42	484.904	46.5478	20.8168	542.701	427.107	5		481.418	69.57	31.1126	567.801	395.035	5
18.5	480.72	78.7198	35.2046	578.464	382.976	5		486.526	69.8828	31.2526	573.297	399.755	5
18.58	461.538	101.765	45.5108	587.896	335.18	5		497.576	51.6254	23.0876	561.677	433.475	5
18.67	447.348	109.638	49.0314	583.481	311.215	5		504.482	76.2472	34.0988	599.155	409.809	5
18.75	452.11	61.5184	27.5119	528.495	375.725	5		474.764	43.7868	19.5821	529.133	420.395	5
18.83	508.814	96.426	43.123	628.543	389.085	5		490.358	80.6141	36.0517	590.454	390.262	5
18.92	466.822	54.9472	24.5731	535.048	398.596	5		485.926	111.437	49.8359	624.293	347.559	5
19	473.08	53.1314	23.7611	539.051	407.109	5		485.794	85.7508	38.3489	592.268	379.32	5
19.08	493.488	44.9318	20.0941	549.278	437.698	5		474.07	61.5512	27.5265	550.496	397.644	5
19.17	487.758	46.4911	20.7915	545.484	430.032	5		472.708	52.2763	23.3787	537.618	407.798	5
19.25	473.158	36.735	16.4284	518.771	427.545	5		470.748	61.421	27.4683	547.012	394.484	5
19.33	525.16	84.5	37.7896	630.081	420.239	5		467.328	49.0576	21.9392	528.241	406.415	5
19.42	493.762	64.8436	28.9989	574.276	413.248	5		477.374	43.5668	19.4837	531.469	423.279	5
19.5	506.202	76.5286	34.2246	601.225	411.179	5		461.776	57.2768	25.615	532.895	390.657	5
19.58	503.148	89.1347	39.8622	613.823	392.473	5		502.992	28.3428	12.6753	538.184	467.8	5
19.67	524.478	99.4208	44.4623	647.925	401.031	5		532.934	100.015	44.7281	657.119	408.749	5
19.75	521.094	72.7592	32.5389	611.436	430.752	5		505.332	102.668	45.9145	632.811	377.853	5
19.83	529.204	53.5301	23.9394	595.67	462.738	5		509.128	66.9496	29.9408	592.257	425.999	5
19.92	464.91	47.2951	21.151	523.635	406.185	5		468.52	72.0123	32.2049	557.935	379.105	5
20	475.766	95.8346	42.8585	594.76	356.772	5		477.83	97.4425	43.5776	598.821	356.839	5
20.08	482.844	117.283	52.4505	628.47	337.218	5		472.014	77.0866	34.4742	567.73	376.298	5
20.17	495.896	103.913	46.4713	624.921	366.871	5		488.314	85.6993	38.3259	594.724	381.904	5
20.25	496.574	80.4476	35.9773	596.463	396.685	5		504.182	54.6463	24.4386	572.034	436.33	5
20.33	499.378	99.7662	44.6168	623.254	375.502	5		506.15	70.3985	31.4832	593.561	418.739	5
20.42	488.294	64.1968	28.7097	568.005	408.583	5		487.744	122.881	54.954	640.321	335.167	5
20.5	498.782	75.1732	33.6185	592.122	405.442	5		488.462	127.006	56.7987	646.16	330.764	5
20.58	516.838	92.6089	41.416	631.827	401.849	5		487.804	41.9465	18.759	539.887	435.721	5
20.67	492.812	117.272	52.4456	638.424	347.2	5		519.636	83.9001	37.5212	623.812	415.46	5
20.75	497.73	107.539	48.093	631.258	364.202	5		515.488	93.8337	41.9637	631.998	398.978	5
20.83	538.104	121.225	54.2136	688.625	387.583	5		517.752	85.4062	38.1948	623.798	411.706	5
20.92	483.506	109.146	48.8117	619.029	347.983	5		496.72	83.7451	37.452	600.703	392.737	5
21	444.596	91.2887	40.8255	557.946	331.246	5		506.722	37.1358	16.6077	552.832	460.612	5
21.08	469.622	133.186	59.5624	634.994	304.25	5		489.708	40.0292	17.9016	539.411	440.005	5
21.17	478.852	113.049	50.5569	619.22	338.484	5		512.63	88.652	39.6464	622.706	402.554	5
21.25	477.724	76.1242	34.0438	572.245	383.203	5		484.256	58.5899	26.2022	557.005	411.507	5
21.33	491.03	91.967	41.1289	605.222	376.838	5		461.994	61.5819	27.5403	538.458	385.53	5
21.42	466.802	75.7962	33.8971	560.915	372.689	5		524.182	74.4175	33.2805	616.583	431.781	5
21.5	454.774	92.0791	41.179	569.105	340.443	5		496.664	64.3651	28.7849	576.584	416.744	5
21.58	460.758	88.1371	39.4161	570.195	351.321	5		495.302	86.4654	38.6685	602.663	387.941	5
21.67	473.748	101.822	45.5362	600.177	347.319	5		502.64	106.014	47.4109	634.274	371.006	5
21.75	529.234	91.2286	40.7987	642.509	415.959	5		514.982	126.539	56.5898	672.101	357.863	5
21.83	529.742	88.2534	39.4681	639.323	420.161	5		497.294	84.576	37.8236	602.309	392.279	5
21.92	501.794	70.8879	31.702	589.813	413.775	5		482.016	71.6749	32.054	571.012	393.02	5
22	483.296	53.0954	23.745	549.223	417.369	5		497.178	37.7977	16.9036	544.11	450.246	5
22.08	512.108	74.6172	33.3698	604.758	419.458	5		495.842	65.2582	29.1844	576.871	414.813	5
22.17	494.928	53.402	23.8821	561.235	428.621	5		516.816	66.496	29.7379	599.382	434.25	5
22.25	541.2	92.5328	41.3819	656.095	426.305	5		511.358	93.1007	41.6359	626.958	395.758	5
22.33	564.12	110.608	49.4654	701.458	426.782	5		538.494	58.3303	26.0861	610.921	466.067	5
22.42	554.838	106.172	47.4816	686.668	423.008	5		503.734	41.4975	18.5583	555.26	452.208	5
22.5	547.628	123.522	55.2409	701.001	394.255	5		505.532	74.245	33.2034	597.719	413.345	5
22.58	502.922	121.66	54.4081	653.983	351.861	5		504.648	84.0623	37.5938	609.025	400.271	5
22.67	505.718	105.351	47.1145	636.529	374.907	5		517.812	90.4686	40.4588	630.144	405.48	5
22.75	541.054	90.4255	40.4395	653.332	428.776	5		522.028	75.0509	33.5638	615.216	428.84	5
22.83	561.336	86.6585	38.7548	668.937	453.735	5		511.024	42.813	19.1465	564.183	457.865	5
22.92	510.106	148.337	66.3382	694.29	325.922	5		513.388	72.2937	32.3307	603.152	423.624	5
23	509.562	133.101	59.5244	674.828	344.296	5		511.824	91.2127	40.7916	625.08	398.568	5
23.08	509.662	99.2717	44.3957	632.924	386.4	5		551.046	106.318	47.5467	683.057	419.035	5
23.17	528.506	98.6996	44.1398	651.058	405.954	5		508.338	145.877	65.2381	689.468	327.208	5
23.25	507.726	137.474	61.4801	678.422	337.03	5		570.018	119.508	53.4455	718.406	421.63	5
23.33	479.696	148.268	66.3073	663.795	295.597	5		611.102	85.7313	38.3402	717.551	504.653	5
23.42	480.028	129.524	57.925	640.854	319.202	5		559.326	101.066	45.1979	684.815	433.837	5
23.5	533.926	123.837	55.3818	687.691	380.161	5		534.906	119.828	53.5888	683.692	386.12	5
23.58	565.728	134.226	60.0277	732.392	399.064	5		544.762	122.046	54.5805	696.302	393.222	5
23.67	599.126	89.674	40.1034	710.471	487.781	5		543.946	116.614	52.1514	688.742	399.15	5
23.75	556.17	85.6264	38.2933	662.489	449.851	5		506.144	101.093	45.21	631.667	380.621	5
23.83	544.272	118.916	53.1807	691.925	396.619	5		565.834	162.078	72.4833	767.08	364.588	5
23.92	574.344	127.858	57.1798	733.101	415.587	5		542.08	144.184	64.4808	721.107	363.053	5
24	611.664	136.027	60.8332	780.564	442.764	5		582.226	102.165	45.6895	709.08	455.372	5
24.08	560.928	127.284	56.9229	718.971	402.885	5		592.726	101.627	45.449	718.913	466.539	5
24.17	548.064	170.746	76.36	760.073	336.055	5		573.37	143.957	64.3793	752.116	394.624	5
24.25	556.278	152.878	68.3691	746.101	366.455	5		581.004	118.448	52.9714	728.076	433.932	5
24.33	534.472	138.371	61.8813	706.282	362.662	5		565.712	149.943	67.0564	751.891	379.533	5
24.42	583.524	135.086	60.4124	751.256	415.792	5		576.602	116.021	51.886	720.661	432.543	5
24.5	631.424	77.1	34.4802	727.156	535.692	5		561.582	121.479	54.3271	712.418	410.746	5
24.58	564.06	86.2478	38.5712	671.151	456.969	5		571.364	146.309	65.4316	753.031	389.697	5
24.67	569.546	96.1401	42.9952	688.92	450.172	5		602.408	102.143	45.6798	729.235	475.581	5
24.75	566.84	58.9114	26.346	639.988	493.692	5		610.548	142.639	63.7899	787.657	433.439	5
24.83	525.36	83.6405	37.4052	629.213	421.507	5		638.05	20.7932	9.29898	663.868	612.232	5
24.92	553.252	90.3884	40.4229	665.484	441.02	5		614.112	47.5006	21.2429	673.092	555.132	5
25	545.23	97.6872	43.687	666.525	423.935	5		563.214	94.5017	42.2625	680.553	445.875	5
25.08	548.294	56.136	25.1048	617.996	478.592	5		563.652	87.3828	39.0788	672.152	455.152	5
25.17	612.816	85.5469	38.2577	719.036	506.596	5		583.3	47.1973	21.1073	641.903	524.697	5
25.25	639.808	81.2905	36.3542	740.744	538.872	5		615.652	73.7774	32.9942	707.259	524.045	5
25.33	642.624	61.4596	27.4856	718.936	566.312	5		617.676	71.362	31.914	706.284	529.068	5
25.42	593.314	39.3471	17.5965	642.17	544.458	5		630.514	38.7386	17.3244	678.614	582.414	5
25.5	626.128	95.2758	42.6086	744.429	507.827	5		628.196	42.9874	19.2246	681.572	574.82	5
25.58	652.878	45.0122	20.1301	708.768	596.988	5		618.428	64.9528	29.0478	699.078	537.778	5
25.67	662.824	66.0057	29.5186	744.781	580.867	5		613.32	65.0797	29.1045	694.127	532.513	5
25.75	589.06	80.9876	36.2188	689.619	488.501	5		646.446	40.0008	17.8889	696.114	596.778	5
25.83	616.85	92.8884	41.541	732.186	501.514	5		635.41	46.315	20.7127	692.918	577.902	5
25.92	644.664	85.1771	38.0924	750.425	538.903	5		608.312	60.5823	27.0932	683.535	533.089	5
26	641.196	60.0622	26.8606	715.773	566.619	5		603.368	61.0144	27.2865	679.127	527.609	5
26.08	653.08	59.4749	26.598	726.928	579.232	5		595.244	62.7512	28.0632	673.16	517.328	5
26.17	652.198	66.4416	29.7136	734.696	569.7	5		611.776	49.2538	22.027	672.933	550.619	5
26.25	617.006	61.8609	27.665	693.816	540.196	5		619.322	72.8366	32.5735	709.761	528.883	5
26.33	618.8	74.6445	33.3821	711.483	526.117	5		646.806	65.0588	29.0952	727.587	566.025	5
26.42	543.888	82.3541	36.8299	646.144	441.632	5		616.92	67.0093	29.9675	700.123	533.717	5
26.5	640.844	49.805	22.2735	702.685	579.003	5		606.78	50.1208	22.4147	669.013	544.547	5
26.58	594.086	73.6756	32.9487	685.566	502.606	5		647.394	46.4177	20.7586	705.029	589.759	5
26.67	578.168	70.9991	31.7517	666.325	490.011	5		615.484	76.6261	34.2682	710.628	520.34	5
26.75	645.312	16.5944	7.42124	665.917	624.707	5		585.876	75.0547	33.5655	679.069	492.683	5
26.83	680.832	44.7013	19.991	736.336	625.328	5		612.638	55.8126	24.9601	681.938	543.338	5
26.92	612.376	50.2999	22.4948	674.832	549.92	5		584.226	53.1051	23.7493	650.165	518.287	5
27	648.678	45.7471	20.4587	705.481	591.875	5		545.712	96.9359	43.3511	666.074	425.35	5
27.08	607.872	64.7386	28.952	688.256	527.488	5		620.122	92.584	41.4048	735.08	505.164	5
27.17	617.586	38.0425	17.0131	664.822	570.35	5		596.94	88.6408	39.6414	707.002	486.878	5
27.25	599.378	99.8096	44.6362	723.308	475.448	5		620.424	69.1406	30.9206	706.273	534.575	5
27.33	609.018	106.796	47.7605	741.622	476.414	5		664.916	25.5009	11.4044	696.58	633.252	5
27.42	574.074	108.031	48.3127	708.212	439.936	5		602.214	39.4684	17.6508	651.22	553.208	5
27.5	596.812	108.463	48.5062	731.487	462.137	5		636.362	60.6569	27.1266	711.678	561.046	5
27.58	581.002	101.787	45.5207	707.388	454.616	5		589.824	78.9314	35.2992	687.83	491.818	5
27.67	600.616	114.84	51.3582	743.209	458.023	5		613.156	63.6728	28.4754	692.216	534.096	5
27.75	602.686	123.13	55.0654	755.572	449.8	5		634.746	50.304	22.4966	697.207	572.285	5
27.83	637.26	73.5981	32.9141	728.644	545.876	5		607.282	46.4435	20.7702	664.949	549.615	5
27.92	627.816	48.0504	21.4888	687.478	568.154	5		596.954	77.9962	34.8809	693.799	500.109	5
28	636.704	37.5701	16.8019	683.353	590.055	5		602.05	74.9045	33.4983	695.056	509.044	5
28.08	644.966	25.9448	11.6029	677.181	612.751	5		615.572	28.4007	12.7012	650.836	580.308	5
28.17	544.434	75.6869	33.8482	638.412	450.456	5		580.508	86.19	38.5453	687.527	473.489	5
28.25	581.172	91.4757	40.9092	694.754	467.59	5		556.728	108.316	48.4404	691.22	422.236	5
28.33	602.326	75.2764	33.6646	695.794	508.858	5		578.2	99.4309	44.4668	701.66	454.74	5
28.42	553.384	69.7635	31.1992	640.007	466.761	5		601.834	122.087	54.5989	753.425	450.243	5
28.5	522.386	81.3678	36.3888	623.418	421.354	5		612.584	80.7949	36.1326	712.904	512.264	5
28.58	570.472	63.5043	28.4	649.323	491.621	5		601.3	83.1008	37.1638	704.483	498.117	5
28.67	658.83	33.1981	14.8466	700.051	617.609	5		568.968	63.7344	28.5029	648.105	489.831	5
28.75	600.444	68.9049	30.8152	686.001	514.887	5		589.818	96.1426	42.9963	709.195	470.441	5
28.83	647.246	36.0865	16.1384	692.053	602.439	5		628.872	27.0227	12.0849	662.425	595.319	5
28.92	635.094	56.8829	25.4388	705.724	564.464	5		614.73	35.5997	15.9207	658.933	570.527	5
29	584.956	64.2153	28.718	664.69	505.222	5		578.048	56.8413	25.4202	648.626	507.47	5
29.08	571.942	86.4198	38.6481	679.246	464.638	5		551.388	150.384	67.2537	738.114	364.662	5
29.17	549.204	70.7364	31.6343	637.035	461.373	5		598.61	84.9767	38.0027	704.122	493.098	5
29.25	577.598	57.8962	25.892	649.486	505.71	5		517.258	160.129	71.6118	716.084	318.432	5
29.33	573.97	99.8774	44.6665	697.984	449.956	5		598.458	97.8274	43.7497	719.927	476.989	5
29.42	582.466	82.5373	36.9118	684.95	479.982	5		561.796	99.8215	44.6415	685.741	437.851	5
29.5	593.332	108.45	48.5005	727.991	458.673	5		558.712	71.5487	31.9975	647.551	469.873	5
29.58	541.116	106.589	47.6681	673.464	408.768	5		599.45	75.4873	33.7589	693.18	505.72	5
29.67	547.04	67.4816	30.1787	630.829	463.251	5		597.982	50.4262	22.5513	660.594	535.37	5
29.75	500.948	97.8389	43.7549	622.431	379.465	5		587.134	67.391	30.1382	670.811	503.457	5
29.83	571.098	128.053	57.2669	730.096	412.1	5		620.88	33.3085	14.896	662.238	579.522	5
29.92	547.906	143.326	64.0973	725.869	369.943	5		602.664	53.8602	24.087	669.54	535.788	5
30	626.98	118.116	52.8233	773.641	480.319	5		569.066	52.8988	23.6571	634.749	503.383	5
30.08	593.014	92.8386	41.5187	708.288	477.74	5		622.846	31.0741	13.8968	661.43	584.262	5
30.17	619.506	89.9039	40.2062	731.136	507.876	5		616.256	61.7447	27.6131	692.922	539.59	5
30.25	578.544	104.127	46.5668	707.834	449.254	5		594.056	68.8873	30.8073	679.591	508.521	5
30.33	608.808	108.241	48.4069	743.207	474.409	5		605.708	19.4594	8.70251	629.87	581.546	5
30.42	561.738	107.399	48.0303	695.092	428.384	5		603.708	60.8966	27.2338	679.321	528.095	5
30.5	595.274	96.681	43.2371	715.319	475.229	5		593.972	69.3944	31.0341	680.137	507.807	5
30.58	636.512	113.863	50.9209	777.891	495.133	5		564.17	26.9912	12.0708	597.684	530.656	5
30.67	621.776	39.1373	17.5027	670.371	573.181	5		538.838	42.1862	18.8662	591.219	486.457	5
30.75	585.402	40.7722	18.2339	636.027	534.777	5		539.798	44.096	19.7203	594.55	485.046	5
30.83	563.064	49.9025	22.3171	625.026	501.102	5		563.822	47.6994	21.3318	623.049	504.595	5
30.92	560.758	29.2026	13.0598	597.018	524.498	5		526.882	157.665	70.5099	722.649	331.115	5
31	565.082	37.5161	16.7777	611.664	518.5	5		540.026	35.5056	15.8786	584.112	495.94	5
31.08	563.11	57.326	25.637	634.29	491.93	5		492.04	122.332	54.7087	643.936	340.144	5
31.17	580.57	54.3114	24.2888	648.007	513.133	5		575.266	86.374	38.6276	682.514	468.018	5
31.25	551.046	83.2568	37.2336	654.423	447.669	5		575.772	81.0046	36.2263	676.352	475.192	5
31.33	510.244	53.9359	24.1209	577.214	443.274	5		540.862	74.253	33.2069	633.059	448.665	5
31.42	505.11	76.6694	34.2876	600.308	409.912	5		563.944	55.4565	24.8009	632.802	495.086	5
31.5	467.112	75.9052	33.9459	561.361	372.863	5		555.646	89.3245	39.9471	666.557	444.735	5
31.58	516.822	100.745	45.0546	641.914	391.73	5		518.06	55.8852	24.9926	587.451	448.669	5
31.67	525.816	86.8448	38.8382	633.648	417.984	5		476.582	102.068	45.6464	603.317	349.847	5
31.75	607.632	79.0418	35.3486	705.775	509.489	5		541.952	98.1255	43.8831	663.791	420.113	5
31.83	556.746	45.5687	20.379	613.327	500.165	5		531.12	64.8613	29.0069	611.656	450.584	5
31.92	544.398	102.283	45.7422	671.399	417.397	5		537.02	84.4492	37.7668	641.877	432.163	5
32	496.28	62.9934	28.1715	574.497	418.063	5		547.932	74.1859	33.1769	640.046	455.818	5
32.08	530.348	87.2348	39.0126	638.664	422.032	5		580.736	113.842	50.9117	722.089	439.383	5
32.17	622.684	77.071	34.4672	718.38	526.988	5		583.502	94.1983	42.1268	700.465	466.539	5
32.25	648.898	69.2644	30.976	734.901	562.895	5		530.804	170.11	76.0756	742.024	319.584	5
32.33	651.624	61.7275	27.6054	728.269	574.979	5		582.198	50.713	22.6795	645.166	519.23	5
32.42	660.726	29.9794	13.4072	697.95	623.502	5		560.058	89.1714	39.8787	670.779	449.337	5
32.5	601.822	53.777	24.0498	668.595	535.049	5		608.898	65.3687	29.2338	690.064	527.732	5
32.58	588.764	73.0417	32.6653	679.457	498.071	5		618.606	45.1493	20.1914	674.666	562.546	5
32.67	612.932	105.926	47.3715	744.457	481.407	5		614.446	22.5558	10.0873	642.453	586.439	5
32.75	578.46	111.604	49.911	717.035	439.885	5		584.208	84.2646	37.6843	688.836	479.58	5
32.83	539.886	116.556	52.1254	684.609	395.163	5		602.826	73.2465	32.7568	693.774	511.878	5
32.92	564.384	132.295	59.164	728.65	400.118	5		605.078	38.721	17.3166	653.156	557	5
33	539.246	115.827	51.7992	683.064	395.428	5		613.174	45.7301	20.4511	669.955	556.393	5
33.08	553.68	88.05	39.3771	663.008	444.352	5		552.228	77.9773	34.8725	649.05	455.406	5
33.17	618.314	82.9546	37.0984	721.316	515.312	5		584.778	58.9978	26.3846	658.033	511.523	5
33.25	624.706	86.8161	38.8253	732.502	516.91	5		600.216	61.258	27.3954	676.278	524.154	5
33.33	593.236	76.2747	34.1111	687.944	498.528	5		584.696	55.5484	24.842	653.668	515.724	5
33.42	598.266	96.2422	43.0408	717.767	478.765	5		612.958	37.8381	16.9217	659.94	565.976	5
33.5	581.672	120.601	53.9342	731.417	431.927	5		573.914	72.385	32.3716	663.792	484.036	5
33.58	525.406	98.548	44.072	647.77	403.042	5		542.602	73.3921	32.8219	633.73	451.474	5
33.67	532.96	134.69	60.235	700.199	365.721	5		548.638	84.4556	37.7697	653.503	443.773	5
33.75	516.618	110.678	49.4966	654.043	379.193	5		568.21	77.7604	34.7755	664.762	471.658	5
33.83	471.608	107.855	48.234	605.527	337.689	5		624.868	50.2215	22.4598	687.226	562.51	5
33.92	560.95	114.433	51.1758	703.037	418.863	5		585.098	96.5157	43.1631	704.938	465.258	5
34	556.306	118.83	53.1422	703.852	408.76	5		574.704	119.862	53.6041	723.533	425.875	5
34.08	553.048	116.248	51.9879	697.389	408.707	5		577.476	119.378	53.3874	725.703	429.249	5
34.17	580.31	101.417	45.3549	706.235	454.385	5		610.612	89.6068	40.0734	721.874	499.35	5
34.25	565.884	102.378	45.7847	693.003	438.765	5		628.01	41.0254	18.3471	678.95	577.07	5
34.33	562.768	121.838	54.4877	714.05	411.486	5		589.44	81.5723	36.4802	690.725	488.155	5
34.42	633.356	89.7331	40.1299	744.774	521.938	5		584.138	79.3464	35.4848	682.66	485.616	5
34.5	601.87	109.443	48.9446	737.762	465.978	5		589.692	56.0943	25.0861	659.342	520.042	5
34.58	636.662	66.0068	29.5191	718.62	554.704	5		572.246	52.3941	23.4313	637.302	507.19	5
34.67	637.098	53.5893	23.9659	703.638	570.558	5		579.396	95.3515	42.6425	697.79	461.002	5
34.75	595.996	60.9261	27.247	671.646	520.346	5		585	100.957	45.1493	710.354	459.646	5
34.83	636.1	49.6535	22.2057	697.753	574.447	5		569.456	63.1439	28.2388	647.859	491.053	5
34.92	610.502	60.7847	27.1838	685.976	535.028	5		558.006	53.8054	24.0625	624.814	491.198	5
35	595.372	74.7369	33.4233	688.17	502.574	5		566.232	54.6709	24.4496	634.115	498.349	5
35.08	565.262	29.9004	13.3719	602.388	528.136	5		605.046	62.2312	27.8306	682.316	527.776	5
35.17	568.284	53.6956	24.0134	634.956	501.612	5		595.258	64.6968	28.9333	675.59	514.926	5
35.25	554.634	84.3951	37.7427	659.424	449.844	5		568.736	21.4031	9.57175	595.311	542.161	5
35.33	586.98	72.9176	32.6097	677.519	496.441	5		586.91	38.9384	17.4138	635.258	538.562	5
35.42	554.554	78.7281	35.2083	652.308	456.8	5		541.902	55.02	24.6057	610.218	473.586	5
35.5	531.05	64.106	28.6691	610.648	451.452	5		548.054	59.5324	26.6237	621.973	474.135	5
35.58	572.188	101.925	45.5821	698.744	445.632	5		512.796	49.1447	21.9782	573.817	451.775	5
35.67	526.048	58.2067	26.0308	598.321	453.775	5		535.242	72.2601	32.3157	624.965	445.519	5
35.75	485.81	42.9921	19.2267	539.192	432.428	5		531.862	55.9149	25.0059	601.29	462.434	5
35.83	477.684	73.8762	33.0384	569.413	385.955	5		534.228	39.2665	17.5605	582.984	485.472	5
35.92	597.836	75.8347	33.9143	691.997	503.675	5		505.748	62.666	28.0251	583.558	427.938	5
36	492.526	56.7684	25.3876	563.013	422.039	5		495.674	68.6904	30.7193	580.964	410.384	5
36.08	525.472	69.093	30.8993	611.262	439.682	5		504.764	87.2986	39.0411	613.16	396.368	5
36.17	527.574	81.9452	36.647	629.322	425.826	5		485.228	14.4944	6.48211	503.225	467.231	5
36.25	561.948	70.0231	31.3153	648.893	475.003	5		507.29	71.198	31.8407	595.694	418.886	5
36.33	519.71	70.0482	31.3265	606.686	432.734	5		463.968	67.0268	29.9753	547.193	380.743	5
36.42	448.68	37.3883	16.7205	495.104	402.256	5		483.576	71.2206	31.8508	572.008	395.144	5
36.5	500.862	45.6042	20.3948	557.487	444.237	5		538.222	109.921	49.1583	674.707	401.737	5
36.58	557.856	96.8948	43.3327	678.167	437.545	5		532.702	111.584	49.902	671.252	394.152	5
36.67	542.542	98.3531	43.9848	664.664	420.42	5		549.366	70.4725	31.5163	636.869	461.863	5
36.75	538.326	108.188	48.3833	672.66	403.992	5		481.798	71.127	31.809	570.114	393.482	5
36.83	486.426	90.1963	40.337	598.42	374.432	5		522.94	64.5178	28.8532	603.049	442.831	5
36.92	475.97	69.4455	31.057	562.198	389.742	5		539.46	71.6059	32.0231	628.37	450.55	5
37	497.58	71.8202	32.119	586.757	408.403	5		513.17	76.9506	34.4134	608.717	417.623	5
37.08	491.172	83.4753	37.3313	594.82	387.524	5		503.18	89.8141	40.1661	614.699	391.661	5
37.17	474.98	75.976	33.9775	569.317	380.643	5		464.91	138.025	61.7266	636.291	293.529	5
37.25	529.062	89.7586	40.1413	640.512	417.612	5		518.388	56.182	25.1253	588.147	448.629	5
37.33	489.62	61.1702	27.3561	565.573	413.667	5		481.602	81.5084	36.4516	582.808	380.396	5
37.42	449.718	48.2936	21.5976	509.682	389.754	5		481.792	68.9176	30.8209	567.364	396.22	5
37.5	485.434	79.0481	35.3514	583.585	387.283	5		458.044	78.3094	35.021	555.278	360.81	5
37.58	490.186	32.7177	14.6318	530.81	449.562	5		466.046	74.0235	33.1043	557.958	374.134	5
37.67	483.18	56.2838	25.1709	553.066	413.294	5		465.776	59.1668	26.4602	539.241	392.311	5
37.75	508.766	87.8885	39.3049	617.894	399.638	5		468.092	90.357	40.4089	580.285	355.899	5
37.83	520.466	98.5366	44.0669	642.815	398.117	5		439.652	69.7458	31.1913	526.253	353.051	5
37.92	468.762	76.841	34.3644	564.173	373.351	5		511.94	81.7079	36.5409	613.394	410.486	5
38	512.456	84.2196	37.6641	617.028	407.884	5		481.07	79.804	35.6894	580.16	381.98	5
38.08	517.03	101.101	45.2137	642.563	391.497	5		515.238	104.412	46.6945	644.883	385.593	5
38.17	495.182	50.4533	22.5634	557.828	432.536	5		521.738	73.6766	32.9492	613.22	430.256	5
38.25	486.876	73.5942	32.9123	578.255	395.497	5		458.456	51.1878	22.8919	522.014	394.898	5
38.33	501.674	61.0019	27.2809	577.418	425.93	5		480.98	74.275	33.2168	573.205	388.755	5
38.42	482.732	55.7502	24.9323	551.955	413.509	5		475.662	43.863	19.6161	530.125	421.199	5
38.5	522.116	94.3011	42.1728	639.206	405.026	5		468.732	98.4142	44.0122	590.929	346.535	5
38.58	509.836	110.246	49.3036	646.725	372.947	5		488.636	94.9163	42.4479	606.49	370.782	5
38.67	548.182	107.934	48.2695	682.2	414.164	5		488.998	62.0955	27.77	566.1	411.896	5
38.75	538.816	88.1897	39.4396	648.318	429.314	5		507.634	62.1244	27.7829	584.772	430.496	5
38.83	515.864	79.7889	35.6827	614.935	416.793	5		511.136	74.2611	33.2106	603.343	418.929	5
38.92	526.104	93.2707	41.7119	641.915	410.293	5		501.77	73.1689	32.7221	592.621	410.919	5
39	486.334	95.5764	42.7431	605.008	367.66	5		458.818	62.7896	28.0804	536.782	380.854	5
39.08	465.604	22.0327	9.85332	492.961	438.247	5		459.814	58.7256	26.2629	532.731	386.897	5
39.17	465.702	44.2862	19.8054	520.691	410.713	5		522.53	80.5225	36.0107	622.512	422.548	5
39.25	517.66	97.0269	43.3917	638.135	397.185	5		500.28	53.0086	23.7062	566.099	434.461	5
39.33	482.478	47.3422	21.1721	541.261	423.695	5		500.864	45.4627	20.3315	557.313	444.415	5
39.42	481.644	122.015	54.5666	633.145	330.143	5		472.792	41.1616	18.408	523.901	421.683	5
39.5	477.908	92.8542	41.5257	593.202	362.614	5		480.014	77.7537	34.7725	576.558	383.47	5
39.58	467.358	37.0177	16.5548	513.322	421.394	5		496.72	73.5271	32.8823	588.016	405.424	5
39.67	485.76	98.21	43.9208	607.704	363.816	5		483.528	84.6908	37.8749	588.685	378.371	5
39.75	483.108	45.3655	20.2881	539.437	426.779	5		506.964	115.455	51.6329	650.32	363.608	5
39.83	498.296	52.9203	23.6667	564.005	432.587	5		461.42	74.8751	33.4851	554.39	368.45	5
39.92	486.712	77.5115	34.6642	582.955	390.469	5		530.046	70.3147	31.4457	617.353	442.739	5
40	482.852	79.8043	35.6896	581.942	383.762	5		498.678	68.4787	30.6246	583.706	413.65	5
40.08	563.38	85.6814	38.3179	669.767	456.993	5		466.842	55.9162	25.0065	536.271	397.413	5
40.17	523.354	96.2066	43.0249	642.81	403.898	5		513.214	32.2658	14.4297	553.277	473.151	5
40.25	478.796	46.9294	20.9874	537.067	420.525	5		499.632	64.6215	28.8996	579.87	419.394	5
40.33	513.792	67.0336	29.9784	597.025	430.559	5		523.854	65.6481	29.3587	605.367	442.341	5
40.42	488.378	52.1985	23.3439	553.191	423.565	5		455.858	50.0601	22.3876	518.016	393.7	5
40.5	504.928	77.9975	34.8815	601.775	408.081	5		455.262	48.4852	21.6833	515.464	395.06	5
40.58	487.68	107.194	47.9386	620.779	354.581	5		489.558	73.8301	33.0178	581.23	397.886	5
40.67	490.032	120.778	54.0137	639.998	340.066	5		459.002	54.6937	24.4598	526.913	391.091	5
40.75	526.024	95.9553	42.9125	645.168	406.88	5		463.804	73.9569	33.0745	555.634	371.974	5
40.83	458.574	66.2328	29.6202	540.813	376.335	5		488.228	64.8858	29.0178	568.794	407.662	5
40.92	468.852	39.7957	17.7972	518.265	419.439	5		483.14	78.9814	35.3216	581.208	385.072	5
41	497.042	71.1533	31.8207	585.391	408.693	5		470.812	66.2148	29.6122	553.029	388.595	5
41.08	502.694	71.7705	32.0967	591.809	413.579	5		479.758	60.1718	26.9096	554.471	405.045	5
41.17	535.768	112.429	50.2799	675.367	396.169	5		472.704	64.7956	28.9775	553.158	392.25	5
41.25	534.55	72.1963	32.2872	624.194	444.906	5		448.888	70.3456	31.4595	536.234	361.542	5
41.33	505.93	51.6657	23.1056	570.081	441.779	5		473.9	54.8974	24.5509	542.064	405.736	5
41.42	470.6	53.5703	23.9574	537.116	404.084	5		490.252	71.5756	32.0096	579.125	401.379	5
41.5	471.092	63.047	28.1955	549.375	392.809	5		492.98	57.2518	25.6038	564.067	421.893	5
41.58	445.698	41.8021	18.6945	497.602	393.794	5		476.8	67.3723	30.1298	560.454	393.146	5
41.67	474.38	54.5831	24.4103	542.154	406.606	5		493.152	86.4581	38.6652	600.504	385.8	5
41.75	455.228	50.8964	22.7615	518.424	392.032	5		497.416	94.8663	42.4255	615.208	379.624	5
41.83	439.462	39.916	17.851	489.024	389.9	5		475.47	56.996	25.4894	546.24	404.7	5
41.92	462.818	54.5202	24.3822	530.514	395.122	5		500.302	34.9139	15.614	543.653	456.951	5
42	447.192	55.9446	25.0192	516.656	377.728	5		500.694	29.6914	13.2784	537.561	463.827	5
42.08	441.392	39.5679	17.6953	490.522	392.262	5		528.218	60.5999	27.1011	603.463	452.973	5
42.17	458.952	68.5314	30.6482	544.045	373.859	5		555.124	51.17	22.8839	618.66	491.588	5
42.25	481.058	94.386	42.2107	598.254	363.862	5		487.562	76.1227	34.0431	582.081	393.043	5
42.33	502.308	44.4217	19.866	557.465	447.151	5		493.498	55.9196	25.008	562.931	424.065	5
42.42	486.232	54.807	24.5104	554.284	418.18	5		501.342	48.3157	21.6075	561.334	441.35	5
42.5	493.116	42.6366	19.0677	546.056	440.176	5		504.892	40.2732	18.0107	554.898	454.886	5
42.58	488.446	45.6156	20.3999	545.085	431.807	5		474.262	57.3844	25.6631	545.514	403.01	5
42.67	505.334	73.5411	32.8886	596.647	414.021	5		500.742	89.9842	40.2422	612.472	389.012	5
42.75	523.328	83.4223	37.3076	626.91	419.746	5		472.912	90.2172	40.3464	584.931	360.893	5
42.83	542.196	80.2034	35.868	641.782	442.61	5		455.904	62.6238	28.0062	533.662	378.146	5
42.92	564.3	95.2294	42.5879	682.543	446.057	5		491.342	73.1807	32.7274	582.208	400.476	5
43	493.202	63.4995	28.3978	572.047	414.357	5		520.112	82.1456	36.7366	622.109	418.115	5
43.08	534.076	72.8382	32.5742	624.517	443.635	5		478.952	60.4373	27.0284	553.995	403.909	5
43.17	511.242	96.7571	43.2711	631.382	391.102	5		454.532	74.1084	33.1423	546.55	362.514	5
43.25	488.462	74.3494	33.2501	580.779	396.145	5		475.802	81.3382	36.3755	576.797	374.807	5
43.33	526.314	119.784	53.5689	675.045	377.583	5		457.304	63.1385	28.2364	535.701	378.907	5
43.42	518.77	106.465	47.6126	650.964	386.576	5		481.796	70.3485	31.4608	569.145	394.447	5
43.5	522.028	126.442	56.5465	679.026	365.03	5		486.056	67.0873	30.0024	569.356	402.756	5
43.58	493.516	91.0196	40.7052	606.532	380.5	5		515.496	90.7865	40.601	628.222	402.77	5
43.67	440.348	79.5502	35.5759	539.123	341.573	5		497.864	59.2358	26.4911	571.415	424.313	5
43.75	464.402	77.0036	34.437	560.015	368.789	5		505.806	102.079	45.6513	632.554	379.058	5
43.83	466.048	91.2492	40.8079	579.349	352.747	5		545.066	69.7759	31.2047	631.704	458.428	5
43.92	478.542	80.2119	35.8719	578.138	378.946	5		522.058	105.565	47.21	653.134	390.982	5
44	565.83	45.0968	20.1679	621.825	509.835	5		593.378	82.1118	36.7215	695.333	491.423	5
44.08	538.52	36.1592	16.1709	583.418	493.622	5		533.562	61.9117	27.6877	610.435	456.689	5
44.17	461.484	53.6373	23.9873	528.084	394.884	5		537.754	67.0185	29.9716	620.969	454.539	5
44.25	486.622	61.6385	27.5656	563.156	410.088	5		511.59	102.228	45.7176	638.523	384.657	5
44.33	532.194	116.66	52.1721	677.047	387.341	5		507.084	74.1252	33.1498	599.123	415.045	5
44.42	545.054	113.379	50.7047	685.833	404.275	5		479.708	96.6984	43.2448	599.775	359.641	5
44.5	520.98	117.572	52.5798	666.965	374.995	5		480.368	109.937	49.1651	616.872	343.864	5
44.58	503.192	86.3551	38.6192	610.416	395.968	5		474.63	80.5082	36.0044	574.594	374.666	5
44.67	498.818	83.6671	37.4171	602.704	394.932	5		465.896	52.209	23.3486	530.722	401.07	5
44.75	464.884	37.9308	16.9632	511.981	417.787	5		479.854	78.5871	35.1452	577.433	382.275	5
44.83	510.01	106.337	47.5553	642.045	377.975	5		516.704	42.5311	19.0205	569.513	463.895	5
44.92	525.474	128.186	57.3266	684.638	366.31	5		507.808	40.8528	18.2699	558.533	457.083	5
45	530.504	98.1159	43.8788	652.331	408.677	5		520.156	36.7277	16.4251	565.759	474.553	5
45.08	526.206	109.495	48.9675	662.162	390.25	5		520.682	70.7231	31.6283	608.496	432.868	5
45.17	553.716	110.368	49.358	690.756	416.676	5		533.162	60.8914	27.2315	608.769	457.555	5
45.25	541.474	87.3459	39.0623	649.928	433.02	5		548.974	80.6224	36.0554	649.08	448.868	5
45.33	519.61	64.6616	28.9176	599.898	439.322	5		519.08	99.1671	44.3489	642.212	395.948	5
45.42	492.6	75.234	33.6457	586.015	399.185	5		528.704	70.6361	31.5894	616.41	440.998	5
45.5	476.466	80.0209	35.7864	575.825	377.107	5		495.15	70.1574	31.3754	582.262	408.038	5
45.58	474.796	85.6987	38.3256	581.205	368.387	5		495.65	67.3178	30.1054	579.236	412.064	5
45.67	483.92	113.401	50.7143	624.725	343.115	5		497.814	63.5176	28.4059	576.682	418.946	5
45.75	483.794	137.42	61.4563	654.424	313.164	5		531.038	42.317	18.9247	583.581	478.495	5
45.83	514.048	170.878	76.4191	726.222	301.874	5		464	84.4394	37.7624	568.845	359.155	5
45.92	487.218	86.8973	38.8617	595.115	379.321	5		527.5	44.6696	19.9769	582.965	472.035	5
46	583.694	122.961	54.9897	736.37	431.018	5		492.512	68.705	30.7258	577.82	407.204	5
46.08	533.618	95.95	42.9101	652.756	414.48	5		501.658	28.6467	12.8112	537.228	466.088	5
46.17	562.378	76.7095	34.3056	657.625	467.131	5		509.642	88.089	39.3946	619.019	400.265	5
46.25	545.248	91.1515	40.7642	658.428	432.068	5		488.908	78.3385	35.034	586.178	391.638	5
46.33	523.686	106.811	47.7674	656.309	391.063	5		505.856	59.6866	26.6927	579.967	431.745	5
46.42	515.472	93.4281	41.7823	631.478	399.466	5		476.77	59.6321	26.6683	550.813	402.727	5
46.5	531.54	68.175	30.4888	616.19	446.89	5		456.084	101.843	45.5457	582.539	329.629	5
46.58	470.316	90.232	40.353	582.354	358.278	5		489.44	53.0049	23.7045	555.254	423.626	5
46.67	472.888	119.744	53.5513	621.57	324.206	5		503.564	70.9376	31.7242	591.645	415.483	5
46.75	497.574	138.392	61.8907	669.41	325.738	5		527.29	55.7262	24.9215	596.483	458.097	5
46.83	486.27	139.606	62.4335	659.613	312.927	5		511.472	91.2697	40.817	624.798	398.146	5
46.92	523.646	125.111	55.9515	678.992	368.3	5		577.398	64.552	28.8686	657.55	497.246	5
47	500.258	102.433	45.8096	627.446	373.07	5		523.53	74.1515	33.1615	615.601	431.459	5
47.08	516.19	111.522	49.8741	654.663	377.717	5		528.966	129.712	58.009	690.025	367.907	5
47.17	548.886	139.652	62.4541	722.286	375.486	5		550.374	108.493	48.5194	685.085	415.663	5
47.25	557.944	162.852	72.8294	760.151	355.737	5		531.116	121.588	54.3758	682.087	380.145	5
47.33	569.734	132.051	59.0549	733.697	405.771	5		541.36	126.114	56.3999	697.951	384.769	5
47.42	524.382	63.497	28.3967	603.224	445.54	5		512.16	118.595	53.0372	659.415	364.905	5
47.5	530.502	114.53	51.2196	672.71	388.294	5		532.07	105.137	47.0186	662.614	401.526	5
47.58	564.308	122.434	54.7542	716.33	412.286	5		549.6	121.237	54.2186	700.135	399.065	5
47.67	543.574	161.149	72.0678	743.666	343.482	5		570.48	88.5496	39.6006	680.429	460.531	5
47.75	564.22	146.209	65.3864	745.762	382.678	5		567.766	121.327	54.2589	718.413	417.119	5
47.83	572.69	88.7494	39.6899	682.887	462.493	5		614.4	99.069	44.305	737.41	491.39	5
47.92	544.458	124.307	55.5919	698.806	390.11	5		592.264	87.7317	39.2348	701.197	483.331	5

## Sheet: Figure 9F
			Baseline							+ Tamoxifen						Activity day	Control	Stim1 smKO		Activity night	Control	Stim1 smKO
Time (h)	Mean	SD	SEM	Upper limit	Lower limit	N		Mean	SD	SEM	Upper limit	Lower limit	N			Mouse 1	0.041965	0.021131		Mouse 1	0.196481	0.099952
0	0.21	0.31305	0.14	0.598702	-0.178702	5		0	0	0	0	0	5			Mouse 2	0.012277	0.009499		Mouse 2	0.091098	0.110022
0.08	0.31	0.43359	0.193907	0.848373	-0.228373	5		0.05	0.0866025	0.0387298	0.157531	-0.0575313	5			Mouse 3	0.023562	0.02061		Mouse 3	0.161064	0.152383
0.17	1.21	1.00087	0.447605	2.45275	-0.03275	5		0.02	0.0447214	0.02	0.0755289	-0.0355289	5			Mouse 4	0.01436	0.026916		Mouse 4	0.181917	0.190457
0.25	0.06	0.0894427	0.04	0.171058	-0.0510578	5		0.03	0.067082	0.03	0.113293	-0.0532934	5			Mouse 5	0.022383	0.007589		Mouse 5	0.108131	0.093976
0.33	0.26	0.357771	0.16	0.704231	-0.184231	5		0.03	0.067082	0.03	0.113293	-0.0532934	5
0.42	0.04	0.0894427	0.04	0.151058	-0.0710578	5		0	0	0	0	0	5		Paired t test				Paired t test
0.5	0.1	0.223607	0.1	0.377645	-0.177645	5		0.23	0.315436	0.141067	0.621666	-0.161666	5		P value	0.3731			P value	0.4189
0.58	0.12	0.268328	0.12	0.453173	-0.213173	5		0.04	0.0894427	0.04	0.151058	-0.0710578	5		Significantly different (P < 0.05)?	No			Significantly different (P < 0.05)?	No
0.67	0.22	0.313449	0.140178	0.609198	-0.169198	5		0.04	0.0894427	0.04	0.151058	-0.0710578	5		One- or two-tailed P value?	Two-tailed			One- or two-tailed P value?	Two-tailed
0.75	0.22	0.389872	0.174356	0.70409	-0.26409	5		0.13	0.263629	0.117898	0.457338	-0.197338	5
0.83	0.15	0.206155	0.0921954	0.405976	-0.105976	5		0	0	0	0	0	5		Mean of differences (B - A)	-0.00576			Mean of differences (B - A)	-0.01838
0.92	0.15	0.223607	0.1	0.427645	-0.127645	5		0.06	0.134164	0.06	0.226587	-0.106587	5		SD of differences	0.01286			SD of differences	0.04565
1	0.07	0.083666	0.0374166	0.173885	-0.0338851	5		0.25	0.504975	0.225832	0.87701	-0.37701	5		SEM of differences	0.005749			SEM of differences	0.02042
1.08	0.08	0.178885	0.08	0.302116	-0.142116	5		0.19	0.235584	0.105357	0.482517	-0.102517	5		95% confidence interval	-0.02172 to 0.01020			95% confidence interval	-0.07506 to 0.03830
1.17	0.36	0.350714	0.156844	0.795468	-0.0754684	5		0.37	0.717287	0.32078	1.26063	-0.520629	5
1.25	0.23	0.315436	0.141067	0.621666	-0.161666	5		0.15	0.173205	0.0774597	0.365063	-0.0650625	5
1.33	0.22	0.491935	0.22	0.830818	-0.390818	5		0.13	0.290689	0.13	0.490938	-0.230938	5
1.42	0.13	0.109545	0.0489898	0.266017	-0.00601748	5		0.06	0.0547723	0.0244949	0.128009	-0.00800874	5
1.5	0.35	0.489898	0.219089	0.958289	-0.258289	5		0.27	0.435316	0.194679	0.810516	-0.270516	5
1.58	0.02	0.0447214	0.02	0.0755289	-0.0355289	5		0.3	0.412311	0.184391	0.811951	-0.211951	5
1.67	0.2	0.340955	0.15248	0.623351	-0.223351	5		0.47	0.845281	0.378021	1.51956	-0.579555	5
1.75	0.82	1.01156	0.452383	2.07602	-0.436015	5		0.29	0.406817	0.181934	0.79513	-0.21513	5
1.83	0.05	0.0866025	0.0387298	0.157531	-0.0575313	5		0.12	0.160468	0.0717635	0.319247	-0.0792474	5
1.92	0.14	0.31305	0.14	0.528702	-0.248702	5		0.28	0.493204	0.220567	0.892393	-0.332393	5
2	0.13	0.290689	0.13	0.490938	-0.230938	5		0.09	0.174642	0.0781025	0.306847	-0.126847	5
2.08	0.26	0.55385	0.247689	0.947696	-0.427696	5		0.28	0.46984	0.210119	0.863384	-0.303384	5
2.17	0.32	0.563028	0.251794	1.01909	-0.379091	5		0.32	0.375167	0.16778	0.785831	-0.145831	5
2.25	0.14	0.31305	0.14	0.528702	-0.248702	5		0.14	0.204328	0.0913783	0.393707	-0.113707	5
2.33	0.18	0.246475	0.110227	0.486039	-0.126039	5		0.08	0.109545	0.0489898	0.216017	-0.0560175	5
2.42	0.25	0.433013	0.193649	0.787656	-0.287656	5		0.27	0.380132	0.17	0.741996	-0.201996	5
2.5	0.01	0.0223607	0.01	0.0377645	-0.0177645	5		0.14	0.204328	0.0913783	0.393707	-0.113707	5
2.58	0.02	0.0447214	0.02	0.0755289	-0.0355289	5		0.14	0.151658	0.0678233	0.328308	-0.0483077	5
2.67	0.21	0.415933	0.186011	0.726449	-0.306449	5		0.14	0.31305	0.14	0.528702	-0.248702	5
2.75	0.13	0.238747	0.106771	0.426443	-0.166443	5		0	0	0	0	0	5
2.83	0.1	0.173205	0.0774597	0.315063	-0.115063	5		0.04	0.0894427	0.04	0.151058	-0.0710578	5
2.92	0.17	0.238747	0.106771	0.466443	-0.126443	5		0.22	0.228035	0.10198	0.503143	-0.063143	5
3	0.11	0.245967	0.11	0.415409	-0.195409	5		0.02	0.0447214	0.02	0.0755289	-0.0355289	5
3.08	0.41	0.587792	0.262869	1.13984	-0.319841	5		0.04	0.0894427	0.04	0.151058	-0.0710578	5
3.17	0.15	0.259808	0.11619	0.472594	-0.172594	5		0	0	0	0	0	5
3.25	0.11	0.174642	0.0781025	0.326847	-0.106847	5		0.08	0.130384	0.0583095	0.241893	-0.0818932	5
3.33	0.16	0.191703	0.0857321	0.398031	-0.0780306	5		0.19	0.317017	0.141774	0.583629	-0.203629	5
3.42	0.21	0.339853	0.151987	0.631983	-0.211983	5		0	0	0	0	0	5
3.5	0.4	0.547723	0.244949	1.08009	-0.280087	5		0	0	0	0	0	5
3.58	0.23	0.342053	0.152971	0.654714	-0.194714	5		0.35	0.282843	0.126491	0.701196	-0.00119561	5
3.67	0.02	0.0447214	0.02	0.0755289	-0.0355289	5		0.05	0.0866025	0.0387298	0.157531	-0.0575313	5
3.75	0	0	0	0	0	5		0.05	0.111803	0.05	0.188822	-0.0888223	5
3.83	0.2	0.447214	0.2	0.755289	-0.355289	5		0.12	0.268328	0.12	0.453173	-0.213173	5
3.92	0.01	0.0223607	0.01	0.0377645	-0.0177645	5		0.21	0.469574	0.21	0.793053	-0.373053	5
4	0.25	0.559017	0.25	0.944111	-0.444111	5		0	0	0	0	0	5
4.08	0.02	0.0447214	0.02	0.0755289	-0.0355289	5		0.02	0.0273861	0.0122474	0.0540044	-0.0140044	5
4.17	0.16	0.33053	0.147817	0.570407	-0.250407	5		0.15	0.229129	0.10247	0.434501	-0.134501	5
4.25	0.49	0.630872	0.282135	1.27333	-0.293332	5		0.02	0.0447214	0.02	0.0755289	-0.0355289	5
4.33	0.12	0.164317	0.0734847	0.324026	-0.0840262	5		0	0	0	0	0	5
4.42	0.06	0.108397	0.0484768	0.194593	-0.0745932	5		0.04	0.0894427	0.04	0.151058	-0.0710578	5
4.5	0.4	0.280624	0.125499	0.748441	0.0515589	5		0.18	0.248998	0.111355	0.489172	-0.129172	5
4.58	0.07	0.109545	0.0489898	0.206017	-0.0660175	5		0.42	0.592242	0.264858	1.15536	-0.315365	5
4.67	0.35	0.482183	0.215639	0.948709	-0.248709	5		0	0	0	0	0	5
4.75	0.05	0.0707107	0.0316228	0.137799	-0.0377989	5		0.11	0.151658	0.0678233	0.298308	-0.0783077	5
4.83	0.08	0.178885	0.08	0.302116	-0.142116	5		0.152	0.198167	0.0886228	0.398056	-0.0940563	5
4.92	0.21	0.442154	0.197737	0.759006	-0.339006	5		0.35	0.585235	0.261725	1.07667	-0.376665	5
5	0.15	0.165831	0.074162	0.355907	-0.0559067	5		0.15	0.212132	0.0948683	0.413397	-0.113397	5
5.08	0.11	0.159687	0.0714143	0.308278	-0.0882778	5		0.25	0.278388	0.124499	0.595665	-0.0956646	5
5.17	0	0	0	0	0	5		0.14	0.147479	0.0659545	0.323119	-0.0431191	5
5.25	0	0	0	0	0	5		0.1	0.173205	0.0774597	0.315063	-0.115063	5
5.33	0.1	0.223607	0.1	0.377645	-0.177645	5		0.02	0.0447214	0.02	0.0755289	-0.0355289	5
5.42	0.19	0.397492	0.177764	0.683552	-0.303552	5		0	0	0	0	0	5
5.5	0.29	0.491681	0.219886	0.900502	-0.320502	5		0.03	0.067082	0.03	0.113293	-0.0532934	5
5.58	0.01	0.0223607	0.01	0.0377645	-0.0177645	5		0.05	0.0707107	0.0316228	0.137799	-0.0377989	5
5.67	0.08	0.178885	0.08	0.302116	-0.142116	5		0.25	0.377492	0.168819	0.718718	-0.218718	5
5.75	0.14	0.31305	0.14	0.528702	-0.248702	5		0.13	0.290689	0.13	0.490938	-0.230938	5
5.83	0.34	0.625899	0.279911	1.11716	-0.437157	5		0.1	0.223607	0.1	0.377645	-0.177645	5
5.92	0	0	0	0	0	5		0.01	0.0223607	0.01	0.0377645	-0.0177645	5
6	0.03	0.0447214	0.02	0.0855289	-0.0255289	5		0.24	0.336155	0.150333	0.657391	-0.177391	5
6.08	0.14	0.25836	0.115542	0.460797	-0.180797	5		0.08	0.178885	0.08	0.302116	-0.142116	5
6.17	0.06	0.134164	0.06	0.226587	-0.106587	5		0.05	0.0866025	0.0387298	0.157531	-0.0575313	5
6.25	0.16	0.216217	0.0966954	0.428469	-0.108469	5		0	0	0	0	0	5
6.33	0.27	0.268328	0.12	0.603173	-0.0631734	5		0.02	0.0447214	0.02	0.0755289	-0.0355289	5
6.42	0.26	0.43359	0.193907	0.798373	-0.278373	5		0.47	0.69606	0.311288	1.33427	-0.394273	5
6.5	0.19	0.324808	0.145258	0.593302	-0.213302	5		0.04	0.0547723	0.0244949	0.108009	-0.0280087	5
6.58	0.17	0.248998	0.111355	0.479172	-0.139172	5		0.04	0.0894427	0.04	0.151058	-0.0710578	5
6.67	0.27	0.294958	0.131909	0.636238	-0.0962383	5		0.1	0.173205	0.0774597	0.315063	-0.115063	5
6.75	0.21	0.235584	0.105357	0.502517	-0.0825166	5		0.2	0.3937	0.176068	0.688844	-0.288844	5
6.83	0.13	0.290689	0.13	0.490938	-0.230938	5		0	0	0	0	0	5
6.92	0.03	0.067082	0.03	0.113293	-0.0532934	5		0.232	0.190709	0.0852877	0.468797	-0.00479675	5
7	0.15	0.259808	0.11619	0.472594	-0.172594	5		0.11	0.219089	0.0979796	0.382035	-0.162035	5
7.08	0.07	0.156525	0.07	0.264351	-0.124351	5		0.12	0.178885	0.08	0.342116	-0.102116	5
7.17	0.01	0.0223607	0.01	0.0377645	-0.0177645	5		0.01	0.0223607	0.01	0.0377645	-0.0177645	5
7.25	0.09	0.201246	0.09	0.33988	-0.15988	5		0.02	0.0447214	0.02	0.0755289	-0.0355289	5
7.33	0.05	0.111803	0.05	0.188822	-0.0888223	5		0.24	0.272489	0.121861	0.578339	-0.0983392	5
7.42	0	0	0	0	0	5		0.14	0.0821584	0.0367423	0.242013	0.0379869	5
7.5	0	0	0	0	0	5		0.04	0.0894427	0.04	0.151058	-0.0710578	5
7.58	0	0	0	0	0	5		0.23	0.315436	0.141067	0.621666	-0.161666	5
7.67	0.12	0.268328	0.12	0.453173	-0.213173	5		0.12	0.216795	0.0969536	0.389186	-0.149186	5
7.75	0.26	0.527257	0.235797	0.914676	-0.394676	5		0.06	0.134164	0.06	0.226587	-0.106587	5
7.83	0.1	0.141421	0.0632456	0.275598	-0.0755978	5		0.28	0.515509	0.230543	0.92009	-0.36009	5
7.92	0.03	0.067082	0.03	0.113293	-0.0532934	5		0.02	0.0447214	0.02	0.0755289	-0.0355289	5
8	0	0	0	0	0	5		0	0	0	0	0	5
8.08	0	0	0	0	0	5		0	0	0	0	0	5
8.17	0	0	0	0	0	5		0	0	0	0	0	5
8.25	0	0	0	0	0	5		0.06	0.0894427	0.04	0.171058	-0.0510578	5
8.33	0	0	0	0	0	5		0.06	0.0894427	0.04	0.171058	-0.0510578	5
8.42	0	0	0	0	0	5		0.07	0.130384	0.0583095	0.231893	-0.0918932	5
8.5	0.17	0.380132	0.17	0.641996	-0.301996	5		0.32	0.486826	0.217715	0.924475	-0.284475	5
8.58	0.02	0.0447214	0.02	0.0755289	-0.0355289	5		0.19	0.424853	0.19	0.717525	-0.337525	5
8.67	0.27	0.380132	0.17	0.741996	-0.201996	5		0.06	0.134164	0.06	0.226587	-0.106587	5
8.75	0.32	0.465833	0.208327	0.898408	-0.258408	5		0.04	0.0894427	0.04	0.151058	-0.0710578	5
8.83	0.13	0.238747	0.106771	0.426443	-0.166443	5		0.19	0.270185	0.12083	0.525479	-0.145479	5
8.92	0	0	0	0	0	5		0	0	0	0	0	5
9	0.2	0.447214	0.2	0.755289	-0.355289	5		0.07	0.156525	0.07	0.264351	-0.124351	5
9.08	0.06	0.134164	0.06	0.226587	-0.106587	5		0.04	0.0894427	0.04	0.151058	-0.0710578	5
9.17	0.06	0.134164	0.06	0.226587	-0.106587	5		0.1	0.15411	0.0689202	0.291353	-0.0913533	5
9.25	0.21	0.31305	0.14	0.598702	-0.178702	5		0.13	0.263629	0.117898	0.457338	-0.197338	5
9.33	0.46	0.779744	0.348712	1.42818	-0.508179	5		0.39	0.602495	0.269444	1.1381	-0.358096	5
9.42	0.16	0.221923	0.0992472	0.435554	-0.115554	5		0.05	0.0707107	0.0316228	0.137799	-0.0377989	5
9.5	0.2	0.308221	0.13784	0.582707	-0.182707	5		0.09	0.201246	0.09	0.33988	-0.15988	5
9.58	0.01	0.0223607	0.01	0.0377645	-0.0177645	5		0.11	0.219089	0.0979796	0.382035	-0.162035	5
9.67	0.12	0.268328	0.12	0.453173	-0.213173	5		0.15	0.33541	0.15	0.566467	-0.266467	5
9.75	0.32	0.493204	0.220567	0.932393	-0.292393	5		0.09	0.134164	0.06	0.256587	-0.0765867	5
9.83	0	0	0	0	0	5		0.21	0.31305	0.14	0.598702	-0.178702	5
9.92	0.13	0.198746	0.0888819	0.376776	-0.116776	5		0.21	0.227486	0.101735	0.492462	-0.0724615	5
10	0.26	0.477493	0.213542	0.852886	-0.332886	5		0.21	0.347131	0.155242	0.64102	-0.22102	5
10.08	0	0	0	0	0	5		0.15	0.33541	0.15	0.566467	-0.266467	5
10.17	0.02	0.0447214	0.02	0.0755289	-0.0355289	5		0.24	0.345326	0.154434	0.668779	-0.188779	5
10.25	0	0	0	0	0	5		0.11	0.245967	0.11	0.415409	-0.195409	5
10.33	0.12	0.268328	0.12	0.453173	-0.213173	5		0.19	0.224722	0.100499	0.469029	-0.0890293	5
10.42	0.45	0.779423	0.348569	1.41778	-0.517781	5		0.47	0.580517	0.259615	1.19081	-0.250807	5
10.5	0.14	0.31305	0.14	0.528702	-0.248702	5		0.2	0.369121	0.165076	0.658324	-0.258324	5
10.58	0.07	0.130384	0.0583095	0.231893	-0.0918932	5		0.25	0.264575	0.118322	0.578513	-0.0785134	5
10.67	0.06	0.0894427	0.04	0.171058	-0.0510578	5		0.1	0.1	0.0447214	0.224166	-0.0241664	5
10.75	0.24	0.230217	0.102956	0.525853	-0.0458525	5		0.2	0.318198	0.142302	0.595095	-0.195095	5
10.83	0.3	0.398434	0.178185	0.794722	-0.194722	5		0.21	0.347131	0.155242	0.64102	-0.22102	5
10.92	0.44	0.69857	0.31241	1.30739	-0.427389	5		0.21	0.31305	0.14	0.598702	-0.178702	5
11	0.25	0.559017	0.25	0.944111	-0.444111	5		0.06	0.134164	0.06	0.226587	-0.106587	5
11.08	0.05	0.0707107	0.0316228	0.137799	-0.0377989	5		0.11	0.159687	0.0714143	0.308278	-0.0882778	5
11.17	0.03	0.0447214	0.02	0.0855289	-0.0255289	5		0.15	0.33541	0.15	0.566467	-0.266467	5
11.25	0	0	0	0	0	5		0.18	0.325192	0.14543	0.58378	-0.22378	5
11.33	0.22	0.491935	0.22	0.830818	-0.390818	5		0.02	0.0447214	0.02	0.0755289	-0.0355289	5
11.42	0	0	0	0	0	5		0.212	0.174557	0.0780641	0.428741	-0.00474062	5
11.5	0.03	0.067082	0.03	0.113293	-0.0532934	5		0.06	0.134164	0.06	0.226587	-0.106587	5
11.58	0	0	0	0	0	5		0.21	0.391152	0.174929	0.69568	-0.27568	5
11.67	0	0	0	0	0	5		0.07	0.156525	0.07	0.264351	-0.124351	5
11.75	0.19	0.424853	0.19	0.717525	-0.337525	5		0	0	0	0	0	5
11.83	0.02	0.0447214	0.02	0.0755289	-0.0355289	5		0	0	0	0	0	5
11.92	0.05	0.111803	0.05	0.188822	-0.0888223	5		0	0	0	0	0	5
12	0.06	0.0894427	0.04	0.171058	-0.0510578	5		0.02	0.0447214	0.02	0.0755289	-0.0355289	5
12.08	0.03	0.067082	0.03	0.113293	-0.0532934	5		0	0	0	0	0	5
12.17	0.2	0.280624	0.125499	0.548441	-0.148441	5		0.02	0.0447214	0.02	0.0755289	-0.0355289	5
12.25	0.14	0.219089	0.0979796	0.412035	-0.132035	5		0.04	0.0547723	0.0244949	0.108009	-0.0280087	5
12.33	0.33	0.290689	0.13	0.690938	-0.0309379	5		0	0	0	0	0	5
12.42	0.04	0.065192	0.0291548	0.120947	-0.0409466	5		0.01	0.0223607	0.01	0.0377645	-0.0177645	5
12.5	0.18	0.268328	0.12	0.513173	-0.153173	5		0	0	0	0	0	5
12.58	0.16	0.357771	0.16	0.604231	-0.284231	5		0	0	0	0	0	5
12.67	0.02	0.0447214	0.02	0.0755289	-0.0355289	5		0	0	0	0	0	5
12.75	0.02	0.0447214	0.02	0.0755289	-0.0355289	5		0	0	0	0	0	5
12.83	0	0	0	0	0	5		0.01	0.0223607	0.01	0.0377645	-0.0177645	5
12.92	0	0	0	0	0	5		0	0	0	0	0	5
13	0	0	0	0	0	5		0.07	0.156525	0.07	0.264351	-0.124351	5
13.08	0	0	0	0	0	5		0	0	0	0	0	5
13.17	0	0	0	0	0	5		0	0	0	0	0	5
13.25	0	0	0	0	0	5		0.01	0.0223607	0.01	0.0377645	-0.0177645	5
13.33	0	0	0	0	0	5		0	0	0	0	0	5
13.42	0.01	0.0223607	0.01	0.0377645	-0.0177645	5		0	0	0	0	0	5
13.5	0.02	0.0447214	0.02	0.0755289	-0.0355289	5		0	0	0	0	0	5
13.58	0.01	0.0223607	0.01	0.0377645	-0.0177645	5		0	0	0	0	0	5
13.67	0.04	0.0894427	0.04	0.151058	-0.0710578	5		0	0	0	0	0	5
13.75	0.02	0.0447214	0.02	0.0755289	-0.0355289	5		0	0	0	0	0	5
13.83	0	0	0	0	0	5		0	0	0	0	0	5
13.92	0.02	0.0447214	0.02	0.0755289	-0.0355289	5		0	0	0	0	0	5
14	0	0	0	0	0	5		0	0	0	0	0	5
14.08	0	0	0	0	0	5		0	0	0	0	0	5
14.17	0	0	0	0	0	5		0	0	0	0	0	5
14.25	0	0	0	0	0	5		0	0	0	0	0	5
14.33	0	0	0	0	0	5		0	0	0	0	0	5
14.42	0	0	0	0	0	5		0	0	0	0	0	5
14.5	0	0	0	0	0	5		0	0	0	0	0	5
14.58	0	0	0	0	0	5		0	0	0	0	0	5
14.67	0	0	0	0	0	5		0	0	0	0	0	5
14.75	0	0	0	0	0	5		0	0	0	0	0	5
14.83	0	0	0	0	0	5		0.06	0.134164	0.06	0.226587	-0.106587	5
14.92	0	0	0	0	0	5		0	0	0	0	0	5
15	0	0	0	0	0	5		0	0	0	0	0	5
15.08	0	0	0	0	0	5		0.02	0.0447214	0.02	0.0755289	-0.0355289	5
15.17	0.02	0.0447214	0.02	0.0755289	-0.0355289	5		0	0	0	0	0	5
15.25	0	0	0	0	0	5		0	0	0	0	0	5
15.33	0.01	0.0223607	0.01	0.0377645	-0.0177645	5		0	0	0	0	0	5
15.42	0.01	0.0223607	0.01	0.0377645	-0.0177645	5		0.02	0.0447214	0.02	0.0755289	-0.0355289	5
15.5	0	0	0	0	0	5		0	0	0	0	0	5
15.58	0.01	0.0223607	0.01	0.0377645	-0.0177645	5		0.02	0.0447214	0.02	0.0755289	-0.0355289	5
15.67	0	0	0	0	0	5		0	0	0	0	0	5
15.75	0	0	0	0	0	5		0	0	0	0	0	5
15.83	0	0	0	0	0	5		0.05	0.111803	0.05	0.188822	-0.0888223	5
15.92	0	0	0	0	0	5		0.02	0.0447214	0.02	0.0755289	-0.0355289	5
16	0	0	0	0	0	5		0	0	0	0	0	5
16.08	0	0	0	0	0	5		0	0	0	0	0	5
16.17	0	0	0	0	0	5		0	0	0	0	0	5
16.25	0	0	0	0	0	5		0	0	0	0	0	5
16.33	0	0	0	0	0	5		0.04	0.0547723	0.0244949	0.108009	-0.0280087	5
16.42	0	0	0	0	0	5		0.064	0.143108	0.064	0.241692	-0.113692	5
16.5	0	0	0	0	0	5		0	0	0	0	0	5
16.58	0	0	0	0	0	5		0	0	0	0	0	5
16.67	0.06	0.134164	0.06	0.226587	-0.106587	5		0	0	0	0	0	5
16.75	0	0	0	0	0	5		0	0	0	0	0	5
16.83	0	0	0	0	0	5		0.04	0.0894427	0.04	0.151058	-0.0710578	5
16.92	0	0	0	0	0	5		0.01	0.0223607	0.01	0.0377645	-0.0177645	5
17	0.02	0.0447214	0.02	0.0755289	-0.0355289	5		0	0	0	0	0	5
17.08	0	0	0	0	0	5		0.07	0.156525	0.07	0.264351	-0.124351	5
17.17	0	0	0	0	0	5		0.06	0.134164	0.06	0.226587	-0.106587	5
17.25	0	0	0	0	0	5		0.02	0.0447214	0.02	0.0755289	-0.0355289	5
17.33	0	0	0	0	0	5		0	0	0	0	0	5
17.42	0	0	0	0	0	5		0	0	0	0	0	5
17.5	0	0	0	0	0	5		0	0	0	0	0	5
17.58	0	0	0	0	0	5		0	0	0	0	0	5
17.67	0	0	0	0	0	5		0	0	0	0	0	5
17.75	0	0	0	0	0	5		0	0	0	0	0	5
17.83	0	0	0	0	0	5		0.03	0.067082	0.03	0.113293	-0.0532934	5
17.92	0	0	0	0	0	5		0	0	0	0	0	5
18	0.02	0.0447214	0.02	0.0755289	-0.0355289	5		0	0	0	0	0	5
18.08	0	0	0	0	0	5		0	0	0	0	0	5
18.17	0.04	0.0894427	0.04	0.151058	-0.0710578	5		0	0	0	0	0	5
18.25	0	0	0	0	0	5		0	0	0	0	0	5
18.33	0	0	0	0	0	5		0	0	0	0	0	5
18.42	0	0	0	0	0	5		0	0	0	0	0	5
18.5	0	0	0	0	0	5		0.05	0.0707107	0.0316228	0.137799	-0.0377989	5
18.58	0	0	0	0	0	5		0.1	0.223607	0.1	0.377645	-0.177645	5
18.67	0	0	0	0	0	5		0	0	0	0	0	5
18.75	0.01	0.0223607	0.01	0.0377645	-0.0177645	5		0	0	0	0	0	5
18.83	0	0	0	0	0	5		0	0	0	0	0	5
18.92	0	0	0	0	0	5		0.02	0.0447214	0.02	0.0755289	-0.0355289	5
19	0	0	0	0	0	5		0.01	0.0223607	0.01	0.0377645	-0.0177645	5
19.08	0	0	0	0	0	5		0	0	0	0	0	5
19.17	0	0	0	0	0	5		0	0	0	0	0	5
19.25	0.01	0.0223607	0.01	0.0377645	-0.0177645	5		0	0	0	0	0	5
19.33	0.01	0.0223607	0.01	0.0377645	-0.0177645	5		0	0	0	0	0	5
19.42	0	0	0	0	0	5		0	0	0	0	0	5
19.5	0.05	0.111803	0.05	0.188822	-0.0888223	5		0	0	0	0	0	5
19.58	0.02	0.0447214	0.02	0.0755289	-0.0355289	5		0	0	0	0	0	5
19.67	0	0	0	0	0	5		0	0	0	0	0	5
19.75	0.01	0.0223607	0.01	0.0377645	-0.0177645	5		0.04	0.0894427	0.04	0.151058	-0.0710578	5
19.83	0.08	0.178885	0.08	0.302116	-0.142116	5		0	0	0	0	0	5
19.92	0	0	0	0	0	5		0.01	0.0223607	0.01	0.0377645	-0.0177645	5
20	0	0	0	0	0	5		0	0	0	0	0	5
20.08	0	0	0	0	0	5		0	0	0	0	0	5
20.17	0	0	0	0	0	5		0	0	0	0	0	5
20.25	0	0	0	0	0	5		0	0	0	0	0	5
20.33	0	0	0	0	0	5		0.01	0.0223607	0.01	0.0377645	-0.0177645	5
20.42	0	0	0	0	0	5		0	0	0	0	0	5
20.5	0	0	0	0	0	5		0.03	0.067082	0.03	0.113293	-0.0532934	5
20.58	0	0	0	0	0	5		0.04	0.0894427	0.04	0.151058	-0.0710578	5
20.67	0.03	0.067082	0.03	0.113293	-0.0532934	5		0	0	0	0	0	5
20.75	0	0	0	0	0	5		0	0	0	0	0	5
20.83	0.02	0.0447214	0.02	0.0755289	-0.0355289	5		0.01	0.0223607	0.01	0.0377645	-0.0177645	5
20.92	0	0	0	0	0	5		0	0	0	0	0	5
21	0	0	0	0	0	5		0	0	0	0	0	5
21.08	0	0	0	0	0	5		0	0	0	0	0	5
21.17	0	0	0	0	0	5		0	0	0	0	0	5
21.25	0	0	0	0	0	5		0	0	0	0	0	5
21.33	0	0	0	0	0	5		0	0	0	0	0	5
21.42	0	0	0	0	0	5		0	0	0	0	0	5
21.5	0	0	0	0	0	5		0	0	0	0	0	5
21.58	0	0	0	0	0	5		0	0	0	0	0	5
21.67	0	0	0	0	0	5		0.12	0.268328	0.12	0.453173	-0.213173	5
21.75	0.1	0.223607	0.1	0.377645	-0.177645	5		0	0	0	0	0	5
21.83	0	0	0	0	0	5		0	0	0	0	0	5
21.92	0	0	0	0	0	5		0	0	0	0	0	5
22	0	0	0	0	0	5		0	0	0	0	0	5
22.08	0	0	0	0	0	5		0	0	0	0	0	5
22.17	0	0	0	0	0	5		0	0	0	0	0	5
22.25	0	0	0	0	0	5		0	0	0	0	0	5
22.33	0	0	0	0	0	5		0.01	0.0223607	0.01	0.0377645	-0.0177645	5
22.42	0.03	0.0447214	0.02	0.0855289	-0.0255289	5		0	0	0	0	0	5
22.5	0	0	0	0	0	5		0	0	0	0	0	5
22.58	0.02	0.0447214	0.02	0.0755289	-0.0355289	5		0	0	0	0	0	5
22.67	0.01	0.0223607	0.01	0.0377645	-0.0177645	5		0	0	0	0	0	5
22.75	0.08	0.178885	0.08	0.302116	-0.142116	5		0	0	0	0	0	5
22.83	0	0	0	0	0	5		0.01	0.0223607	0.01	0.0377645	-0.0177645	5
22.92	0.01	0.0223607	0.01	0.0377645	-0.0177645	5		0.1	0.173205	0.0774597	0.315063	-0.115063	5
23	0.02	0.0447214	0.02	0.0755289	-0.0355289	5		0	0	0	0	0	5
23.08	0.19	0.424853	0.19	0.717525	-0.337525	5		0	0	0	0	0	5
23.17	0	0	0	0	0	5		0.29	0.64846	0.29	1.09517	-0.515169	5
23.25	0.03	0.067082	0.03	0.113293	-0.0532934	5		0.26	0.52607	0.235266	0.913203	-0.393203	5
23.33	0	0	0	0	0	5		0.1	0.223607	0.1	0.377645	-0.177645	5
23.42	0.05	0.111803	0.05	0.188822	-0.0888223	5		0	0	0	0	0	5
23.5	0.14	0.219089	0.0979796	0.412035	-0.132035	5		0.02	0.0447214	0.02	0.0755289	-0.0355289	5
23.58	0	0	0	0	0	5		0.01	0.0223607	0.01	0.0377645	-0.0177645	5
23.67	0.05	0.111803	0.05	0.188822	-0.0888223	5		0.01	0.0223607	0.01	0.0377645	-0.0177645	5
23.75	0	0	0	0	0	5		0	0	0	0	0	5
23.83	0.24	0.482701	0.21587	0.839352	-0.359352	5		0	0	0	0	0	5
23.92	0	0	0	0	0	5		0.03	0.0447214	0.02	0.0855289	-0.0255289	5
24	0.38	0.849706	0.38	1.43505	-0.675049	5		0.02	0.0447214	0.02	0.0755289	-0.0355289	5
24.08	0.08	0.178885	0.08	0.302116	-0.142116	5		0.17	0.299166	0.133791	0.541463	-0.201463	5
24.17	0.44	0.665582	0.297658	1.26643	-0.38643	5		0	0	0	0	0	5
24.25	0.17	0.352846	0.157797	0.608116	-0.268116	5		0.17	0.248998	0.111355	0.479172	-0.139172	5
24.33	0	0	0	0	0	5		0.31	0.482701	0.21587	0.909352	-0.289352	5
24.42	0.16	0.357771	0.16	0.604231	-0.284231	5		0	0	0	0	0	5
24.5	0.06	0.0894427	0.04	0.171058	-0.0510578	5		0.06	0.134164	0.06	0.226587	-0.106587	5
24.58	0.04	0.0894427	0.04	0.151058	-0.0710578	5		0	0	0	0	0	5
24.67	0.03	0.0447214	0.02	0.0855289	-0.0255289	5		0	0	0	0	0	5
24.75	0.09	0.174642	0.0781025	0.306847	-0.126847	5		0.02	0.0273861	0.0122474	0.0540044	-0.0140044	5
24.83	0	0	0	0	0	5		0.13	0.263629	0.117898	0.457338	-0.197338	5
24.92	0.02	0.0447214	0.02	0.0755289	-0.0355289	5		0	0	0	0	0	5
25	0.02	0.0447214	0.02	0.0755289	-0.0355289	5		0.02	0.0447214	0.02	0.0755289	-0.0355289	5
25.08	0.09	0.134164	0.06	0.256587	-0.0765867	5		0.148	0.330938	0.148	0.558914	-0.262914	5
25.17	0.12	0.268328	0.12	0.453173	-0.213173	5		0.12	0.15248	0.0681909	0.309328	-0.0693283	5
25.25	0.26	0.55385	0.247689	0.947696	-0.427696	5		0.11	0.245967	0.11	0.415409	-0.195409	5
25.33	0.03	0.067082	0.03	0.113293	-0.0532934	5		0.15	0.15411	0.0689202	0.341353	-0.0413533	5
25.42	0.06	0.134164	0.06	0.226587	-0.106587	5		0.26	0.397492	0.177764	0.753552	-0.233552	5
25.5	0.13	0.290689	0.13	0.490938	-0.230938	5		0.44	0.43359	0.193907	0.978373	-0.0983727	5
25.58	0.18	0.24135	0.107935	0.479676	-0.119676	5		0.1	0.223607	0.1	0.377645	-0.177645	5
25.67	0.32	0.35812	0.160156	0.764665	-0.124665	5		0.3	0.462331	0.206761	0.87406	-0.27406	5
25.75	0.01	0.0223607	0.01	0.0377645	-0.0177645	5		0.22	0.389872	0.174356	0.70409	-0.26409	5
25.83	0.16	0.219089	0.0979796	0.432035	-0.112035	5		0.15	0.165831	0.074162	0.355907	-0.0559067	5
25.92	0.26	0.581378	0.26	0.981876	-0.461876	5		0.13	0.238747	0.106771	0.426443	-0.166443	5
26	0.39	0.581378	0.26	1.11188	-0.331876	5		0.16	0.281514	0.125897	0.509546	-0.189546	5
26.08	0.29	0.497996	0.222711	0.908344	-0.328344	5		0.19	0.288097	0.128841	0.54772	-0.16772	5
26.17	0.186	0.242858	0.108609	0.487548	-0.115548	5		0.242	0.319875	0.143052	0.639177	-0.155177	5
26.25	0.27	0.178885	0.08	0.492116	0.0478844	5		0.06	0.134164	0.06	0.226587	-0.106587	5
26.33	0.17	0.327109	0.146287	0.576159	-0.236159	5		0.32	0.485541	0.217141	0.922879	-0.282879	5
26.42	0.09	0.174642	0.0781025	0.306847	-0.126847	5		0.03	0.067082	0.03	0.113293	-0.0532934	5
26.5	0.12	0.268328	0.12	0.453173	-0.213173	5		0.34	0.544748	0.243619	1.01639	-0.336394	5
26.58	0.14	0.219089	0.0979796	0.412035	-0.132035	5		0	0	0	0	0	5
26.67	0.08	0.130384	0.0583095	0.241893	-0.0818932	5		0.01	0.0223607	0.01	0.0377645	-0.0177645	5
26.75	0.09	0.151658	0.0678233	0.278308	-0.0983077	5		0.12	0.144049	0.0644205	0.29886	-0.05886	5
26.83	0.22	0.349285	0.156205	0.653695	-0.213695	5		0.1	0.223607	0.1	0.377645	-0.177645	5
26.92	0.16	0.250998	0.11225	0.471655	-0.151655	5		0.02	0.0447214	0.02	0.0755289	-0.0355289	5
27	0.51	0.339853	0.151987	0.931983	0.0880169	5		0.1	0.223607	0.1	0.377645	-0.177645	5
27.08	0.4	0.605186	0.270647	1.15144	-0.351438	5		0.22	0.319374	0.142829	0.616556	-0.176556	5
27.17	0.28	0.144049	0.0644205	0.45886	0.10114	5		0.2	0.282843	0.126491	0.551196	-0.151196	5
27.25	0.04	0.0547723	0.0244949	0.108009	-0.0280087	5		0.13	0.290689	0.13	0.490938	-0.230938	5
27.33	0.14	0.31305	0.14	0.528702	-0.248702	5		0.18	0.23076	0.103199	0.466526	-0.106526	5
27.42	0.14	0.232916	0.104163	0.429204	-0.149204	5		0.08	0.15248	0.0681909	0.269328	-0.109328	5
27.5	0.28	0.626099	0.28	1.0574	-0.497405	5		0.22	0.491935	0.22	0.830818	-0.390818	5
27.58	0.2	0.3937	0.176068	0.688844	-0.288844	5		0.02	0.0447214	0.02	0.0755289	-0.0355289	5
27.67	0.18	0.402492	0.18	0.67976	-0.31976	5		0.53	0.383406	0.171464	1.00606	0.0539388	5
27.75	0.14	0.260768	0.116619	0.463786	-0.183786	5		0.1	0.136931	0.0612372	0.270022	-0.0700218	5
27.83	0.49	0.489132	0.218746	1.09734	-0.117337	5		0.52	0.588005	0.262964	1.2501	-0.210105	5
27.92	0.17	0.178885	0.08	0.392116	-0.0521156	5		0.13	0.290689	0.13	0.490938	-0.230938	5
28	0.18	0.303315	0.135647	0.556615	-0.196615	5		0.29	0.33429	0.149499	0.705076	-0.125076	5
28.08	0.02	0.0447214	0.02	0.0755289	-0.0355289	5		0.33	0.429535	0.192094	0.863338	-0.203338	5
28.17	0.03	0.0447214	0.02	0.0855289	-0.0255289	5		0.13	0.185742	0.0830662	0.360629	-0.100629	5
28.25	0.2	0.447214	0.2	0.755289	-0.355289	5		0.13	0.263629	0.117898	0.457338	-0.197338	5
28.33	0.13	0.198746	0.0888819	0.376776	-0.116776	5		0	0	0	0	0	5
28.42	0.13	0.178885	0.08	0.352116	-0.0921156	5		0.17	0.281957	0.126095	0.520096	-0.180096	5
28.5	0.05	0.0707107	0.0316228	0.137799	-0.0377989	5		0.24	0.378153	0.169115	0.709539	-0.229539	5
28.58	0.02	0.0447214	0.02	0.0755289	-0.0355289	5		0.11	0.174642	0.0781025	0.326847	-0.106847	5
28.67	0.226	0.310451	0.138838	0.611476	-0.159476	5		0.13	0.290689	0.13	0.490938	-0.230938	5
28.75	0.05	0.0707107	0.0316228	0.137799	-0.0377989	5		0.02	0.0447214	0.02	0.0755289	-0.0355289	5
28.83	0.12	0.268328	0.12	0.453173	-0.213173	5		0.04	0.0894427	0.04	0.151058	-0.0710578	5
28.92	0.21	0.300832	0.134536	0.583532	-0.163532	5		0.03	0.0447214	0.02	0.0855289	-0.0255289	5
29	0.03	0.067082	0.03	0.113293	-0.0532934	5		0.17	0.281957	0.126095	0.520096	-0.180096	5
29.08	0.23	0.327109	0.146287	0.636159	-0.176159	5		0.05	0.0866025	0.0387298	0.157531	-0.0575313	5
29.17	0.43	0.609918	0.272764	1.18731	-0.327313	5		0.05	0.0707107	0.0316228	0.137799	-0.0377989	5
29.25	0.04	0.0894427	0.04	0.151058	-0.0710578	5		0.01	0.0223607	0.01	0.0377645	-0.0177645	5
29.33	0.08	0.130384	0.0583095	0.241893	-0.0818932	5		0.106	0.237023	0.106	0.400303	-0.188303	5
29.42	0.21	0.274773	0.122882	0.551175	-0.131175	5		0.36	0.362974	0.162327	0.810692	-0.0906915	5
29.5	0.07	0.130384	0.0583095	0.231893	-0.0918932	5		0.11	0.194936	0.087178	0.352045	-0.132045	5
29.58	0.04	0.0894427	0.04	0.151058	-0.0710578	5		0.08	0.130384	0.0583095	0.241893	-0.0818932	5
29.67	0.09	0.134164	0.06	0.256587	-0.0765867	5		0	0	0	0	0	5
29.75	0.04	0.0894427	0.04	0.151058	-0.0710578	5		0.21	0.469574	0.21	0.793053	-0.373053	5
29.83	0.11	0.245967	0.11	0.415409	-0.195409	5		0.14	0.194936	0.087178	0.382045	-0.102045	5
29.92	0.02	0.0447214	0.02	0.0755289	-0.0355289	5		0.06	0.134164	0.06	0.226587	-0.106587	5
30	0.26	0.43359	0.193907	0.798373	-0.278373	5		0.02	0.0273861	0.0122474	0.0540044	-0.0140044	5
30.08	0.02	0.0447214	0.02	0.0755289	-0.0355289	5		0.12	0.216795	0.0969536	0.389186	-0.149186	5
30.17	0.36	0.392747	0.175642	0.847659	-0.127659	5		0.4	0.715017	0.319766	1.28781	-0.487811	5
30.25	0.37	0.827345	0.37	1.39728	-0.657285	5		0.11	0.174642	0.0781025	0.326847	-0.106847	5
30.33	0.12	0.268328	0.12	0.453173	-0.213173	5		0.04	0.0894427	0.04	0.151058	-0.0710578	5
30.42	0.1	0.0935414	0.041833	0.216147	-0.016147	5		0	0	0	0	0	5
30.5	0.04	0.0547723	0.0244949	0.108009	-0.0280087	5		0.15	0.33541	0.15	0.566467	-0.266467	5
30.58	0.23	0.338378	0.151327	0.650152	-0.190152	5		0.42	0.584808	0.261534	1.14613	-0.306135	5
30.67	0.42	0.413219	0.184797	0.933079	-0.0930792	5		0.04	0.0894427	0.04	0.151058	-0.0710578	5
30.75	0.06	0.0894427	0.04	0.171058	-0.0510578	5		0.02	0.0447214	0.02	0.0755289	-0.0355289	5
30.83	0.12	0.268328	0.12	0.453173	-0.213173	5		0.01	0.0223607	0.01	0.0377645	-0.0177645	5
30.92	0.21	0.201246	0.09	0.45988	-0.0398801	5		0.06	0.065192	0.0291548	0.140947	-0.0209466	5
31	0.152	0.157385	0.0703847	0.347419	-0.0434191	5		0.064	0.117175	0.0524023	0.209492	-0.0814921	5
31.08	0.33	0.528678	0.236432	0.98644	-0.32644	5		0.17	0.327109	0.146287	0.576159	-0.236159	5
31.17	0.08	0.178885	0.08	0.302116	-0.142116	5		0.03	0.067082	0.03	0.113293	-0.0532934	5
31.25	0	0	0	0	0	5		0.01	0.0223607	0.01	0.0377645	-0.0177645	5
31.33	0	0	0	0	0	5		0.15	0.33541	0.15	0.566467	-0.266467	5
31.42	0	0	0	0	0	5		0.03	0.0447214	0.02	0.0855289	-0.0255289	5
31.5	0	0	0	0	0	5		0.17	0.263629	0.117898	0.497338	-0.157338	5
31.58	0	0	0	0	0	5		0.04	0.0894427	0.04	0.151058	-0.0710578	5
31.67	0	0	0	0	0	5		0	0	0	0	0	5
31.75	0.02	0.0273861	0.0122474	0.0540044	-0.0140044	5		0	0	0	0	0	5
31.83	0.05	0.111803	0.05	0.188822	-0.0888223	5		0.03	0.067082	0.03	0.113293	-0.0532934	5
31.92	0.23	0.486826	0.217715	0.834475	-0.374475	5		0.02	0.0447214	0.02	0.0755289	-0.0355289	5
32	0	0	0	0	0	5		0.02	0.0273861	0.0122474	0.0540044	-0.0140044	5
32.08	0.09	0.134164	0.06	0.256587	-0.0765867	5		0.05	0.111803	0.05	0.188822	-0.0888223	5
32.17	0.05	0.111803	0.05	0.188822	-0.0888223	5		0.28	0.363318	0.162481	0.731119	-0.171119	5
32.25	0.16	0.181659	0.0812404	0.385559	-0.0655595	5		0.06	0.134164	0.06	0.226587	-0.106587	5
32.33	0.11	0.134164	0.06	0.276587	-0.0565867	5		0.16	0.151658	0.0678233	0.348308	-0.0283077	5
32.42	0.31	0.343511	0.153623	0.736526	-0.116526	5		0.22	0.270647	0.121037	0.556053	-0.116053	5
32.5	0.04	0.065192	0.0291548	0.120947	-0.0409466	5		0.09	0.151658	0.0678233	0.278308	-0.0983077	5
32.58	0.02	0.0447214	0.02	0.0755289	-0.0355289	5		0.14	0.204328	0.0913783	0.393707	-0.113707	5
32.67	0.16	0.174642	0.0781025	0.376847	-0.0568473	5		0.12	0.195576	0.0874643	0.36284	-0.12284	5
32.75	0.36	0.461519	0.206398	0.933052	-0.213052	5		0.1	0.223607	0.1	0.377645	-0.177645	5
32.83	0.04	0.0894427	0.04	0.151058	-0.0710578	5		0.32	0.394652	0.176494	0.810025	-0.170025	5
32.92	0.17	0.380132	0.17	0.641996	-0.301996	5		0.4	0.465027	0.207966	0.977407	-0.177407	5
33	0.28	0.476445	0.213073	0.871585	-0.311585	5		0.35	0.438748	0.196214	0.894778	-0.194778	5
33.08	0.04	0.0547723	0.0244949	0.108009	-0.0280087	5		0.08	0.130384	0.0583095	0.241893	-0.0818932	5
33.17	0.19	0.424853	0.19	0.717525	-0.337525	5		0.17	0.352846	0.157797	0.608116	-0.268116	5
33.25	0.11	0.194936	0.087178	0.352045	-0.132045	5		0	0	0	0	0	5
33.33	0.07	0.156525	0.07	0.264351	-0.124351	5		0.02	0.0447214	0.02	0.0755289	-0.0355289	5
33.42	0.06	0.0547723	0.0244949	0.128009	-0.00800874	5		0.08	0.130384	0.0583095	0.241893	-0.0818932	5
33.5	0.04	0.0894427	0.04	0.151058	-0.0710578	5		0.08	0.178885	0.08	0.302116	-0.142116	5
33.58	0.02	0.0447214	0.02	0.0755289	-0.0355289	5		0.11	0.245967	0.11	0.415409	-0.195409	5
33.67	0.02	0.0447214	0.02	0.0755289	-0.0355289	5		0.02	0.0447214	0.02	0.0755289	-0.0355289	5
33.75	0.18	0.402492	0.18	0.67976	-0.31976	5		0.08	0.109545	0.0489898	0.216017	-0.0560175	5
33.83	0	0	0	0	0	5		0.11	0.194936	0.087178	0.352045	-0.132045	5
33.92	0.02	0.0447214	0.02	0.0755289	-0.0355289	5		0.18	0.268328	0.12	0.513173	-0.153173	5
34	0.16	0.357771	0.16	0.604231	-0.284231	5		0	0	0	0	0	5
34.08	0.04	0.0894427	0.04	0.151058	-0.0710578	5		0.15	0.212132	0.0948683	0.413397	-0.113397	5
34.17	0.05	0.111803	0.05	0.188822	-0.0888223	5		0.3	0.331662	0.148324	0.711813	-0.111813	5
34.25	0.09	0.201246	0.09	0.33988	-0.15988	5		0.18	0.130384	0.0583095	0.341893	0.0181068	5
34.33	0.13	0.198746	0.0888819	0.376776	-0.116776	5		0.23	0.297069	0.132853	0.59886	-0.13886	5
34.42	0.11	0.245967	0.11	0.415409	-0.195409	5		0.31	0.332415	0.148661	0.722748	-0.102748	5
34.5	0.37	0.420714	0.188149	0.892385	-0.152385	5		0.256	0.22289	0.0996795	0.532755	-0.0207546	5
34.58	0.29	0.374833	0.167631	0.755417	-0.175417	5		0.23	0.299166	0.133791	0.601463	-0.141463	5
34.67	0.46	0.326726	0.146116	0.865684	0.0543159	5		0.02	0.0447214	0.02	0.0755289	-0.0355289	5
34.75	0.15	0.187083	0.083666	0.382294	-0.0822941	5		0.02	0.0447214	0.02	0.0755289	-0.0355289	5
34.83	0.21	0.204328	0.0913783	0.463707	-0.0437069	5		0.25	0.531507	0.237697	0.909953	-0.409953	5
34.92	0.36	0.198116	0.0886002	0.605994	0.114006	5		0.05	0.0707107	0.0316228	0.137799	-0.0377989	5
35	0	0	0	0	0	5		0.11	0.151658	0.0678233	0.298308	-0.0783077	5
35.08	0.3	0.3937	0.176068	0.788844	-0.188844	5		0.12	0.189077	0.0845577	0.35477	-0.11477	5
35.17	0.08	0.083666	0.0374166	0.183885	-0.0238851	5		0.24	0.336155	0.150333	0.657391	-0.177391	5
35.25	0	0	0	0	0	5		0.23	0.389872	0.174356	0.71409	-0.25409	5
35.33	0.4	0.56899	0.25446	1.10649	-0.306495	5		0.28	0.389872	0.174356	0.76409	-0.20409	5
35.42	0.02	0.0447214	0.02	0.0755289	-0.0355289	5		0.04	0.0894427	0.04	0.151058	-0.0710578	5
35.5	0	0	0	0	0	5		0.32	0.66106	0.295635	1.14081	-0.500814	5
35.58	0.04	0.0894427	0.04	0.151058	-0.0710578	5		0	0	0	0	0	5
35.67	0.04	0.0894427	0.04	0.151058	-0.0710578	5		0	0	0	0	0	5
35.75	0	0	0	0	0	5		0	0	0	0	0	5
35.83	0.19	0.424853	0.19	0.717525	-0.337525	5		0.02	0.0447214	0.02	0.0755289	-0.0355289	5
35.92	0.12	0.268328	0.12	0.453173	-0.213173	5		0	0	0	0	0	5
36	0.03	0.067082	0.03	0.113293	-0.0532934	5		0	0	0	0	0	5
36.08	0.05	0.0866025	0.0387298	0.157531	-0.0575313	5		0	0	0	0	0	5
36.17	0	0	0	0	0	5		0	0	0	0	0	5
36.25	0.04	0.0894427	0.04	0.151058	-0.0710578	5		0.05	0.111803	0.05	0.188822	-0.0888223	5
36.33	0	0	0	0	0	5		0	0	0	0	0	5
36.42	0	0	0	0	0	5		0	0	0	0	0	5
36.5	0.01	0.0223607	0.01	0.0377645	-0.0177645	5		0	0	0	0	0	5
36.58	0.01	0.0223607	0.01	0.0377645	-0.0177645	5		0.1	0.223607	0.1	0.377645	-0.177645	5
36.67	0.04	0.0894427	0.04	0.151058	-0.0710578	5		0.16	0.304959	0.136382	0.538657	-0.218657	5
36.75	0.14	0.219089	0.0979796	0.412035	-0.132035	5		0.05	0.111803	0.05	0.188822	-0.0888223	5
36.83	0	0	0	0	0	5		0.32	0.715542	0.32	1.20846	-0.568462	5
36.92	0.042	0.0939149	0.042	0.158611	-0.0746107	5		0.01	0.0223607	0.01	0.0377645	-0.0177645	5
37	0.04	0.0894427	0.04	0.151058	-0.0710578	5		0.04	0.0894427	0.04	0.151058	-0.0710578	5
37.08	0.23	0.514296	0.23	0.868582	-0.408582	5		0	0	0	0	0	5
37.17	0.11	0.174642	0.0781025	0.326847	-0.106847	5		0	0	0	0	0	5
37.25	0	0	0	0	0	5		0	0	0	0	0	5
37.33	0	0	0	0	0	5		0	0	0	0	0	5
37.42	0	0	0	0	0	5		0	0	0	0	0	5
37.5	0	0	0	0	0	5		0	0	0	0	0	5
37.58	0.01	0.0223607	0.01	0.0377645	-0.0177645	5		0	0	0	0	0	5
37.67	0	0	0	0	0	5		0	0	0	0	0	5
37.75	0	0	0	0	0	5		0	0	0	0	0	5
37.83	0	0	0	0	0	5		0	0	0	0	0	5
37.92	0	0	0	0	0	5		0	0	0	0	0	5
38	0	0	0	0	0	5		0	0	0	0	0	5
38.08	0	0	0	0	0	5		0.02	0.0447214	0.02	0.0755289	-0.0355289	5
38.17	0	0	0	0	0	5		0.02	0.0447214	0.02	0.0755289	-0.0355289	5
38.25	0	0	0	0	0	5		0	0	0	0	0	5
38.33	0.01	0.0223607	0.01	0.0377645	-0.0177645	5		0	0	0	0	0	5
38.42	0	0	0	0	0	5		0.01	0.0223607	0.01	0.0377645	-0.0177645	5
38.5	0.1	0.15411	0.0689202	0.291353	-0.0913533	5		0	0	0	0	0	5
38.58	0	0	0	0	0	5		0	0	0	0	0	5
38.67	0	0	0	0	0	5		0	0	0	0	0	5
38.75	0.01	0.0223607	0.01	0.0377645	-0.0177645	5		0	0	0	0	0	5
38.83	0.05	0.111803	0.05	0.188822	-0.0888223	5		0.02	0.0447214	0.02	0.0755289	-0.0355289	5
38.92	0	0	0	0	0	5		0	0	0	0	0	5
39	0	0	0	0	0	5		0	0	0	0	0	5
39.08	0	0	0	0	0	5		0	0	0	0	0	5
39.17	0	0	0	0	0	5		0	0	0	0	0	5
39.25	0.02	0.0447214	0.02	0.0755289	-0.0355289	5		0.06	0.134164	0.06	0.226587	-0.106587	5
39.33	0	0	0	0	0	5		0	0	0	0	0	5
39.42	0.04	0.0894427	0.04	0.151058	-0.0710578	5		0	0	0	0	0	5
39.5	0	0	0	0	0	5		0.02	0.0447214	0.02	0.0755289	-0.0355289	5
39.58	0	0	0	0	0	5		0	0	0	0	0	5
39.67	0.02	0.0447214	0.02	0.0755289	-0.0355289	5		0	0	0	0	0	5
39.75	0	0	0	0	0	5		0	0	0	0	0	5
39.83	0	0	0	0	0	5		0	0	0	0	0	5
39.92	0	0	0	0	0	5		0.1	0.173205	0.0774597	0.315063	-0.115063	5
40	0	0	0	0	0	5		0	0	0	0	0	5
40.08	0	0	0	0	0	5		0	0	0	0	0	5
40.17	0.16	0.357771	0.16	0.604231	-0.284231	5		0	0	0	0	0	5
40.25	0	0	0	0	0	5		0.03	0.067082	0.03	0.113293	-0.0532934	5
40.33	0	0	0	0	0	5		0.05	0.0707107	0.0316228	0.137799	-0.0377989	5
40.42	0	0	0	0	0	5		0	0	0	0	0	5
40.5	0.01	0.0223607	0.01	0.0377645	-0.0177645	5		0	0	0	0	0	5
40.58	0	0	0	0	0	5		0	0	0	0	0	5
40.67	0	0	0	0	0	5		0	0	0	0	0	5
40.75	0.02	0.0447214	0.02	0.0755289	-0.0355289	5		0	0	0	0	0	5
40.83	0	0	0	0	0	5		0	0	0	0	0	5
40.92	0	0	0	0	0	5		0	0	0	0	0	5
41	0.02	0.0447214	0.02	0.0755289	-0.0355289	5		0	0	0	0	0	5
41.08	0	0	0	0	0	5		0.16	0.357771	0.16	0.604231	-0.284231	5
41.17	0.01	0.0223607	0.01	0.0377645	-0.0177645	5		0.02	0.0447214	0.02	0.0755289	-0.0355289	5
41.25	0.04	0.0894427	0.04	0.151058	-0.0710578	5		0	0	0	0	0	5
41.33	0.04	0.0894427	0.04	0.151058	-0.0710578	5		0	0	0	0	0	5
41.42	0	0	0	0	0	5		0	0	0	0	0	5
41.5	0.06	0.108397	0.0484768	0.194593	-0.0745932	5		0	0	0	0	0	5
41.58	0	0	0	0	0	5		0	0	0	0	0	5
41.67	0	0	0	0	0	5		0	0	0	0	0	5
41.75	0	0	0	0	0	5		0.02	0.0447214	0.02	0.0755289	-0.0355289	5
41.83	0	0	0	0	0	5		0.01	0.0223607	0.01	0.0377645	-0.0177645	5
41.92	0	0	0	0	0	5		0	0	0	0	0	5
42	0	0	0	0	0	5		0	0	0	0	0	5
42.08	0	0	0	0	0	5		0.04	0.0894427	0.04	0.151058	-0.0710578	5
42.17	0.01	0.0223607	0.01	0.0377645	-0.0177645	5		0.02	0.0447214	0.02	0.0755289	-0.0355289	5
42.25	0	0	0	0	0	5		0.07	0.109545	0.0489898	0.206017	-0.0660175	5
42.33	0	0	0	0	0	5		0	0	0	0	0	5
42.42	0	0	0	0	0	5		0	0	0	0	0	5
42.5	0	0	0	0	0	5		0.02	0.0447214	0.02	0.0755289	-0.0355289	5
42.58	0	0	0	0	0	5		0	0	0	0	0	5
42.67	0.02	0.0447214	0.02	0.0755289	-0.0355289	5		0	0	0	0	0	5
42.75	0	0	0	0	0	5		0.03	0.067082	0.03	0.113293	-0.0532934	5
42.83	0.02	0.0447214	0.02	0.0755289	-0.0355289	5		0.15	0.33541	0.15	0.566467	-0.266467	5
42.92	0.11	0.245967	0.11	0.415409	-0.195409	5		0	0	0	0	0	5
43	0	0	0	0	0	5		0.01	0.0223607	0.01	0.0377645	-0.0177645	5
43.08	0.02	0.0447214	0.02	0.0755289	-0.0355289	5		0	0	0	0	0	5
43.17	0	0	0	0	0	5		0	0	0	0	0	5
43.25	0.01	0.0223607	0.01	0.0377645	-0.0177645	5		0	0	0	0	0	5
43.33	0.04	0.0547723	0.0244949	0.108009	-0.0280087	5		0	0	0	0	0	5
43.42	0	0	0	0	0	5		0	0	0	0	0	5
43.5	0.12	0.216795	0.0969536	0.389186	-0.149186	5		0	0	0	0	0	5
43.58	0.12	0.268328	0.12	0.453173	-0.213173	5		0	0	0	0	0	5
43.67	0	0	0	0	0	5		0.04	0.0547723	0.0244949	0.108009	-0.0280087	5
43.75	0	0	0	0	0	5		0	0	0	0	0	5
43.83	0	0	0	0	0	5		0.03	0.067082	0.03	0.113293	-0.0532934	5
43.92	0	0	0	0	0	5		0	0	0	0	0	5
44	0.03	0.0447214	0.02	0.0855289	-0.0255289	5		0.03	0.0447214	0.02	0.0855289	-0.0255289	5
44.08	0.01	0.0223607	0.01	0.0377645	-0.0177645	5		0.08	0.178885	0.08	0.302116	-0.142116	5
44.17	0	0	0	0	0	5		0.01	0.0223607	0.01	0.0377645	-0.0177645	5
44.25	0	0	0	0	0	5		0	0	0	0	0	5
44.33	0	0	0	0	0	5		0.01	0.0223607	0.01	0.0377645	-0.0177645	5
44.42	0.03	0.067082	0.03	0.113293	-0.0532934	5		0	0	0	0	0	5
44.5	0.01	0.0223607	0.01	0.0377645	-0.0177645	5		0	0	0	0	0	5
44.58	0	0	0	0	0	5		0	0	0	0	0	5
44.67	0	0	0	0	0	5		0	0	0	0	0	5
44.75	0	0	0	0	0	5		0	0	0	0	0	5
44.83	0	0	0	0	0	5		0.05	0.111803	0.05	0.188822	-0.0888223	5
44.92	0	0	0	0	0	5		0.02	0.0447214	0.02	0.0755289	-0.0355289	5
45	0.14	0.31305	0.14	0.528702	-0.248702	5		0	0	0	0	0	5
45.08	0	0	0	0	0	5		0	0	0	0	0	5
45.17	0.02	0.0447214	0.02	0.0755289	-0.0355289	5		0	0	0	0	0	5
45.25	0.01	0.0223607	0.01	0.0377645	-0.0177645	5		0	0	0	0	0	5
45.33	0	0	0	0	0	5		0	0	0	0	0	5
45.42	0	0	0	0	0	5		0	0	0	0	0	5
45.5	0	0	0	0	0	5		0	0	0	0	0	5
45.58	0	0	0	0	0	5		0	0	0	0	0	5
45.67	0	0	0	0	0	5		0	0	0	0	0	5
45.75	0	0	0	0	0	5		0	0	0	0	0	5
45.83	0.02	0.0447214	0.02	0.0755289	-0.0355289	5		0	0	0	0	0	5
45.92	0	0	0	0	0	5		0.01	0.0223607	0.01	0.0377645	-0.0177645	5
46	0	0	0	0	0	5		0.02	0.0447214	0.02	0.0755289	-0.0355289	5
46.08	0.05	0.111803	0.05	0.188822	-0.0888223	5		0.05	0.0707107	0.0316228	0.137799	-0.0377989	5
46.17	0.08	0.178885	0.08	0.302116	-0.142116	5		0	0	0	0	0	5
46.25	0.06	0.134164	0.06	0.226587	-0.106587	5		0	0	0	0	0	5
46.33	0	0	0	0	0	5		0	0	0	0	0	5
46.42	0	0	0	0	0	5		0	0	0	0	0	5
46.5	0.01	0.0223607	0.01	0.0377645	-0.0177645	5		0.06	0.134164	0.06	0.226587	-0.106587	5
46.58	0	0	0	0	0	5		0	0	0	0	0	5
46.67	0	0	0	0	0	5		0.02	0.0447214	0.02	0.0755289	-0.0355289	5
46.75	0.01	0.0223607	0.01	0.0377645	-0.0177645	5		0.1	0.223607	0.1	0.377645	-0.177645	5
46.83	0.03	0.0447214	0.02	0.0855289	-0.0255289	5		0	0	0	0	0	5
46.92	0.04	0.0894427	0.04	0.151058	-0.0710578	5		0.03	0.0447214	0.02	0.0855289	-0.0255289	5
47	0	0	0	0	0	5		0	0	0	0	0	5
47.08	0.17	0.380132	0.17	0.641996	-0.301996	5		0.13	0.290689	0.13	0.490938	-0.230938	5
47.17	0	0	0	0	0	5		0.06	0.0894427	0.04	0.171058	-0.0510578	5
47.25	0.08	0.130384	0.0583095	0.241893	-0.0818932	5		0	0	0	0	0	5
47.33	0.01	0.0223607	0.01	0.0377645	-0.0177645	5		0	0	0	0	0	5
47.42	0.04	0.0894427	0.04	0.151058	-0.0710578	5		0	0	0	0	0	5
47.5	0	0	0	0	0	5		0	0	0	0	0	5
47.58	0	0	0	0	0	5		0	0	0	0	0	5
47.67	0.3	0.67082	0.3	1.13293	-0.532934	5		0.02	0.0447214	0.02	0.0755289	-0.0355289	5
47.75	0.22	0.303315	0.135647	0.596615	-0.156615	5		0	0	0	0	0	5
47.83	0.23	0.286356	0.128062	0.585558	-0.125558	5		0.07	0.156525	0.07	0.264351	-0.124351	5
47.92	0.18	0.402492	0.18	0.67976	-0.31976	5		0.22	0.491935	0.22	0.830818	-0.390818	5
